# Supplementary material
Source: PubMed Central journal article supplement (PMC4983523)
Supplement: NIHMS800666-supplement-5.pdf [file NIHMS800666-supplement-5.pdf]

Supplemental Table 2  
Vehicle versus FSH, 24 hours

|    | A              | B                         | C                      | D         | E                      | F         | G                         |
|----|----------------|---------------------------|------------------------|-----------|------------------------|-----------|---------------------------|
| 1  | Feature ID     | Fold Change: FSH/Veh RPKM | Veh: Unique gene reads | Veh: RPKM | FSH: Unique gene reads | FSH: RPKM |                           |
| 2  | AABR07002068.1 | ∞                         | 1205                   | 0         | 824                    | 0.09      | Genes up-regulated by FSH |
| 3  | AABR07056415.1 | ∞                         | 3                      | 0         | 33                     | 1.05      |                           |
| 4  | Acsm3          | ∞                         | 21                     | 0         | 21                     | 0.71      |                           |
| 5  | Acsm5          | ∞                         | 2                      | 0         | 23                     | 1.1       |                           |
| 6  | Aox2           | ∞                         | 9                      | 0         | 27                     | 0.66      |                           |
| 7  | Auts2l         | ∞                         | 37                     | 0         | 42                     | 0.55      |                           |
| 8  | Brinp3         | ∞                         | 26                     | 0         | 14                     | 0.24      |                           |
| 9  | Cacna1d        | ∞                         | 11                     | 0         | 20                     | 0.26      |                           |
| 10 | Ccdc81         | ∞                         | 36                     | 0         | 16                     | 0.19      |                           |
| 11 | Cml5           | ∞                         | 10                     | 0         | 43                     | 1.22      |                           |
| 12 | Cyp19a1        | ∞, > 27.7                 | 0                      | 0         | 278                    | 27.7      |                           |
| 13 | Dpp6           | ∞                         | 17                     | 0         | 20                     | 0.73      |                           |
| 14 | Edil3          | ∞                         | 20                     | 0         | 15                     | 0.82      |                           |
| 15 | Fam189a1       | ∞                         | 86                     | 0         | 70                     | 0.23      |                           |
| 16 | Fstl5          | ∞                         | 19                     | 0         | 24                     | 0.1       |                           |
| 17 | Gabbr2         | ∞                         | 10                     | 0         | 39                     | 0.26      |                           |
| 18 | Grid2          | ∞                         | 12                     | 0         | 24                     | 0.18      |                           |
| 19 | Heatr9         | ∞, > 3.31                 | 1                      | 0         | 20                     | 3.31      |                           |
| 20 | Hist1h2bo      | ∞                         | 29                     | 0         | 37                     | 2.45      |                           |
| 21 | Inmt           | ∞, >27.1                  | 0                      | 0         | 85                     | 27.12     |                           |
| 22 | Iqcg           | ∞                         | 169                    | 0         | 94                     | 0.12      |                           |
| 23 | Itgam          | ∞                         | 749                    | 0         | 1144                   | 0.05      |                           |
| 24 | Kcne4          | ∞, > 33.96                | 0                      | 0         | 59                     | 33.96     |                           |
| 25 | Kcnh8          | ∞                         | 37                     | 0         | 17                     | 0.1       |                           |
| 26 | L3mbtl4        | ∞                         | 8                      | 0         | 84                     | 1.04      |                           |
| 27 | Lrrc74b        | ∞, > 4.12                 | 0                      | 0         | 25                     | 4.12      |                           |
| 28 | Megf11         | ∞                         | 30                     | 0         | 26                     | 0.21      |                           |
| 29 | Mmd2           | ∞, > 4.56                 | 1                      | 0         | 37                     | 4.56      |                           |
| 30 | Nos1           | ∞                         | 152                    | 0         | 210                    | 0.11      |                           |
| 31 | Pld5           | ∞                         | 14                     | 0         | 23                     | 0.3       |                           |
| 32 | Ptpr           | ∞                         | 29                     | 0         | 33                     | 0.1       |                           |
| 33 | Ptprt          | ∞                         | 23                     | 0         | 23                     | 0.1       |                           |
| 34 | RGD1564074     | ∞, > 2.22                 | 1                      | 0         | 22                     | 2.22      |                           |
| 35 | Ric3           | ∞                         | 16                     | 0         | 28                     | 0.18      |                           |
| 36 | Rn60_X_0640.3  | ∞                         | 14                     | 0         | 26                     | 0.45      |                           |
| 37 | Rnf152         | ∞, > 2.11                 | 1                      | 0         | 40                     | 2.11      |                           |
| 38 | Rtp2           | ∞                         | 70                     | 0         | 72                     | 0.39      |                           |
| 39 | Serpine3       | ∞                         | 27                     | 0         | 15                     | 0.3       |                           |
| 40 | Setbp1         | ∞                         | 4                      | 0         | 30                     | 1.18      |                           |
| 41 | Slc7a9         | ∞                         | 22                     | 0         | 5                      | 0.42      |                           |
| 42 | Srgap3         | ∞, > 2.64                 | 6                      | 0         | 62                     | 2.64      |                           |
| 43 | Stox1          | ∞                         | 3                      | 0         | 23                     | 1.2       |                           |
| 44 | Sycp3          | ∞                         | 10                     | 0         | 28                     | 0.66      |                           |
| 45 | Tmem132d       | ∞                         | 19                     | 0         | 23                     | 0.11      |                           |
| 46 | Tmprss11d      | ∞                         | 16                     | 0         | 26                     | 0.22      |                           |
| 47 | Slc26a7        | 284.81                    | 12                     | 0.05      | 267                    | 13.42     |                           |
| 48 | Lhcgr          | 215.06                    | 3                      | 0.24      | 419                    | 50.96     |                           |
| 49 | Cyp11a1        | 204.53                    | 5                      | 0.5       | 686                    | 102.64    |                           |
| 50 | Ass1           | 91.55                     | 4                      | 0.48      | 211                    | 43.73     |                           |

Supplemental Table 2  
Vehicle versus FSH, 24 hours

|     | A            | B     | C   | D     | E    | F      | G |
|-----|--------------|-------|-----|-------|------|--------|---|
| 51  | Chst1        | 69.75 | 3   | 0.11  | 50   | 7.36   |   |
| 52  | Fam110c      | 65.39 | 2   | 0.08  | 46   | 5.24   |   |
| 53  | Acsbg1       | 61.39 | 5   | 0.32  | 193  | 19.93  |   |
| 54  | Mrap         | 59.58 | 2   | 0.6   | 107  | 35.51  |   |
| 55  | Nppc         | 51.59 | 2   | 0.49  | 41   | 25.2   |   |
| 56  | Map2k6       | 50.86 | 4   | 0.12  | 100  | 5.97   |   |
| 57  | Rasd1        | 50.44 | 7   | 1.05  | 244  | 52.75  |   |
| 58  | Kcnq1        | 45.05 | 152 | 0.06  | 123  | 2.81   |   |
| 59  | Rxrg         | 45.05 | 1   | 0.12  | 33   | 5.29   |   |
| 60  | Rasal1       | 43.59 | 2   | 0.08  | 33   | 3.35   |   |
| 61  | Nptx2        | 41.88 | 18  | 1.44  | 338  | 60.22  |   |
| 62  | Calml3       | 41.66 | 3   | 0.54  | 86   | 22.65  |   |
| 63  | Slc6a7       | 40.69 | 1   | 0.05  | 37   | 2.18   |   |
| 64  | LOC100911154 | 39.97 | 203 | 17.44 | 4860 | 697    |   |
| 65  | Trim7        | 39.23 | 4   | 0.33  | 95   | 12.75  |   |
| 66  | AY172581.20  | 37.78 | 1   | 3.61  | 16   | 136.43 |   |
| 67  | Tmem178b     | 37.05 | 4   | 0.05  | 62   | 1.93   |   |
| 68  | Kit          | 35.96 | 8   | 0.19  | 106  | 6.81   |   |
| 69  | Grid1        | 33.42 | 13  | 0.09  | 41   | 3.02   |   |
| 70  | RGD1309821   | 33.42 | 2   | 0.11  | 24   | 3.57   |   |
| 71  | Tmem25       | 33.42 | 2   | 0.1   | 24   | 3.28   |   |
| 72  | Cldn11       | 31.97 | 2   | 0.13  | 22   | 4.3    |   |
| 73  | Grik1        | 31.97 | 3   | 0.08  | 34   | 2.58   |   |
| 74  | Ereg         | 30.52 | 2   | 0.12  | 24   | 3.62   |   |
| 75  | Igfbp4       | 29.95 | 32  | 3.55  | 646  | 106.32 |   |
| 76  | Wfdc10       | 29.06 | 1   | 0.51  | 20   | 14.87  |   |
| 77  | Star         | 27.8  | 16  | 3.24  | 310  | 90.05  |   |
| 78  | Fgl2         | 27.61 | 1   | 0.07  | 3    | 1.87   |   |
| 79  | Adgrb1       | 27.61 | 7   | 0.18  | 102  | 4.86   |   |
| 80  | Stox2        | 27.61 | 6   | 0.04  | 29   | 1.2    |   |
| 81  | Ccrl2        | 26.16 | 1   | 0.12  | 18   | 3.26   |   |
| 82  | Exoc3l1      | 26.16 | 3   | 0.2   | 46   | 5.19   |   |
| 83  | Tmem132c     | 26.16 | 7   | 0.08  | 34   | 2.02   |   |
| 84  | Lrrc17       | 25.43 | 1   | 0.24  | 13   | 6.14   |   |
| 85  | Fam198a      | 25.43 | 2   | 0.23  | 61   | 5.86   |   |
| 86  | Ddit4        | 25.14 | 11  | 1.45  | 175  | 36.42  |   |
| 87  | Fads6        | 24.22 | 5   | 0.42  | 58   | 10.08  |   |
| 88  | Cybb         | 23.98 | 3   | 0.12  | 33   | 2.79   |   |
| 89  | Raet1c       | 23.98 | 6   | 0.42  | 33   | 10.08  |   |
| 90  | Scarb1       | 23.49 | 292 | 24.4  | 4486 | 573.11 |   |
| 91  | Tmem86a      | 22.89 | 14  | 1.65  | 193  | 37.79  |   |
| 92  | Prlr         | 22.28 | 16  | 0.25  | 265  | 5.6    |   |
| 93  | Ly6g6e       | 21.8  | 2   | 0.96  | 37   | 21.01  |   |
| 94  | RGD1306091   | 21.8  | 7   | 0.08  | 26   | 1.82   |   |
| 95  | Crabp2_2     | 21.8  | 12  | 4.99  | 202  | 108.76 |   |
| 96  | Slc37a2      | 21.8  | 3   | 0.05  | 20   | 1.18   |   |
| 97  | Etnk2        | 20.81 | 34  | 2.55  | 388  | 53.06  |   |
| 98  | Hunk         | 19.86 | 15  | 0.35  | 61   | 6.92   |   |
| 99  | Nxpe2        | 18.89 | 1   | 0.3   | 17   | 5.65   |   |
| 100 | Rhbg         | 18.89 | 2   | 0.1   | 18   | 1.87   |   |
| 101 | Acpp         | 18.16 | 3   | 0.09  | 25   | 1.6    |   |
| 102 | Fdxr         | 18.12 | 18  | 2.03  | 217  | 36.78  |   |
| 103 | Sfrp4        | 18.06 | 9   | 0.38  | 89   | 6.86   |   |
| 104 | Fbxl8        | 17.44 | 4   | 0.13  | 16   | 2.22   |   |

Supplemental Table 2  
Vehicle versus FSH, 24 hours

|     | A              | B     | C    | D      | E     | F       | G |
|-----|----------------|-------|------|--------|-------|---------|---|
| 105 | Hao2           | 17.44 | 6    | 0.23   | 69    | 3.94    |   |
| 106 | Phyhip_2       | 17.44 | 0    | 0.27   | 0     | 4.7     |   |
| 107 | Vom2r6         | 17.44 | 2    | 0.2    | 28    | 3.44    |   |
| 108 | Myom2          | 16.95 | 6    | 0.17   | 37    | 2.81    |   |
| 109 | Grem2          | 16.32 | 67   | 4.02   | 767   | 65.62   |   |
| 110 | Adck3          | 16.13 | 11   | 0.97   | 131   | 15.57   |   |
| 111 | Tenm2          | 15.98 | 17   | 0.03   | 36    | 0.43    |   |
| 112 | Cited4         | 15.98 | 1    | 0.28   | 11    | 4.46    |   |
| 113 | Dner           | 15.98 | 5    | 0.16   | 13    | 2.6     |   |
| 114 | Spef1          | 15.98 | 2    | 0.17   | 12    | 2.65    |   |
| 115 | Scube1         | 15.98 | 3    | 0.06   | 21    | 0.94    |   |
| 116 | Adcyap1r1      | 15.5  | 5    | 0.12   | 37    | 1.8     |   |
| 117 | Bmp6           | 15.5  | 35   | 1.47   | 178   | 22.85   |   |
| 118 | Hsd11b2        | 15.26 | 2    | 0.27   | 22    | 4.08    |   |
| 119 | Pgm5           | 14.89 | 9    | 0.58   | 64    | 8.71    |   |
| 120 | Pappa          | 14.66 | 16   | 0.53   | 174   | 7.79    |   |
| 121 | Atp1b2         | 14.57 | 37   | 2.9    | 350   | 42.24   |   |
| 122 | RGD1561916     | 14.53 | 3    | 0.21   | 13    | 3.11    |   |
| 123 | Dusp15         | 14.53 | 1    | 0.08   | 10    | 1.16    |   |
| 124 | Ecel1          | 14.53 | 1    | 0.03   | 10    | 0.49    |   |
| 125 | Pde4d          | 14.53 | 81   | 0.83   | 176   | 12.04   |   |
| 126 | SNORD36_6      | 14.53 | 0    | 3.51   | 0     | 51      |   |
| 127 | Sox18          | 14.53 | 4    | 0.61   | 40    | 8.86    |   |
| 128 | Trpc2          | 14.53 | 6    | 0.06   | 16    | 0.86    |   |
| 129 | Unc5d          | 14.53 | 12   | 0.25   | 58    | 3.6     |   |
| 130 | Rasgef1b       | 14.4  | 38   | 3.07   | 381   | 44.24   |   |
| 131 | Myo7a          | 14.24 | 8    | 0.18   | 64    | 2.61    |   |
| 132 | Inha           | 13.99 | 1520 | 265.89 | 14653 | 3720.95 |   |
| 133 | Myrip          | 13.95 | 6    | 0.27   | 87    | 3.74    |   |
| 134 | Cyp17a1        | 13.8  | 2    | 0.27   | 19    | 3.77    |   |
| 135 | Gstt1          | 13.8  | 5    | 0.53   | 20    | 7.26    |   |
| 136 | Tubb4a         | 13.8  | 2    | 0.23   | 20    | 3.21    |   |
| 137 | Btbd11         | 13.47 | 71   | 0.8    | 270   | 10.78   |   |
| 138 | AABR07068327.1 | 13.08 | 1    | 0.88   | 14    | 11.56   |   |
| 139 | Acan           | 13.08 | 8    | 0.04   | 11    | 0.47    |   |
| 140 | Aldh1l1        | 13.08 | 3    | 0.08   | 14    | 1.08    |   |
| 141 | Bsn            | 13.08 | 6    | 0.02   | 12    | 0.2     |   |
| 142 | Epcam          | 13.08 | 1    | 0.17   | 9     | 2.23    |   |
| 143 | Kirrel3        | 13.08 | 21   | 0.07   | 40    | 0.94    |   |
| 144 | Ldlrad1        | 13.08 | 6    | 0.13   | 10    | 1.75    |   |
| 145 | Prkcb          | 13.08 | 23   | 0.29   | 131   | 3.83    |   |
| 146 | Syn3           | 13.08 | 131  | 0.11   | 131   | 1.44    |   |
| 147 | Tmem45al       | 13.08 | 5    | 0.32   | 6     | 4.13    |   |
| 148 | Dpep2          | 13.08 | 2    | 0.15   | 11    | 2       |   |
| 149 | Hbq1b          | 13.08 | 1    | 0.58   | 9     | 7.54    |   |
| 150 | Sgk1           | 12.99 | 94   | 5.66   | 749   | 73.46   |   |
| 151 | Smoc2          | 12.93 | 10   | 0.8    | 106   | 10.33   |   |
| 152 | Flvcr2         | 12.84 | 23   | 1.29   | 203   | 16.59   |   |
| 153 | Tns4           | 12.79 | 20   | 1.12   | 167   | 14.32   |   |
| 154 | Isyna1         | 12.65 | 393  | 48.66  | 3424  | 615.35  |   |
| 155 | Folr1          | 12.43 | 9    | 2.16   | 80    | 26.81   |   |
| 156 | Lilrb3l        | 12.25 | 291  | 0.34   | 212   | 4.19    |   |
| 157 | Tbc1d30        | 12.25 | 11   | 0.77   | 81    | 9.38    |   |
| 158 | Gsta1          | 11.76 | 18   | 1.89   | 110   | 22.18   |   |

Supplemental Table 2  
Vehicle versus FSH, 24 hours

|     | A               | B     | C   | D     | E    | F      | G |
|-----|-----------------|-------|-----|-------|------|--------|---|
| 159 | Dnah9           | 11.62 | 26  | 0.02  | 36   | 0.22   |   |
| 160 | Faah_1          | 11.62 | 0   | 0.14  | 0    | 1.66   |   |
| 161 | Nr0b1           | 11.62 | 10  | 1.4   | 81   | 16.27  |   |
| 162 | Aard            | 11.62 | 1   | 0.2   | 8    | 2.33   |   |
| 163 | Ap5z1           | 11.62 | 2   | 0.51  | 13   | 5.94   |   |
| 164 | AY172581.3      | 11.62 | 2   | 7.33  | 16   | 85.19  |   |
| 165 | Cntfr           | 11.62 | 2   | 0.13  | 10   | 1.56   |   |
| 166 | Gldn            | 11.62 | 11  | 0.84  | 78   | 9.72   |   |
| 167 | Hsd17b13        | 11.62 | 5   | 0.19  | 22   | 2.23   |   |
| 168 | Hsf2bp          | 11.62 | 7   | 0.09  | 21   | 1.08   |   |
| 169 | Mt1m            | 11.62 | 0   | 0.67  | 1    | 7.74   |   |
| 170 | SNORA7_2        | 11.62 | 0   | 1.78  | 0    | 20.69  |   |
| 171 | SNORD42_1       | 11.62 | 0   | 3.83  | 0    | 44.56  |   |
| 172 | Syt13           | 11.62 | 2   | 0.07  | 10   | 0.84   |   |
| 173 | Wfikkn2         | 11.62 | 1   | 0.08  | 10   | 0.88   |   |
| 174 | Oas1a           | 11.43 | 12  | 1.84  | 100  | 21.03  |   |
| 175 | Slc27a6         | 11.38 | 6   | 0.49  | 56   | 5.63   |   |
| 176 | Kcnt1           | 11.31 | 23  | 0.6   | 163  | 6.74   |   |
| 177 | Fbxo2           | 11.14 | 3   | 0.57  | 24   | 6.41   |   |
| 178 | Rplp1_2         | 11.14 | 1   | 2.17  | 9    | 24.21  |   |
| 179 | Ptx3            | 11.08 | 3   | 1.04  | 14   | 11.48  |   |
| 180 | AABR07001634.1  | 10.9  | 2   | 0.34  | 16   | 3.7    |   |
| 181 | AABR07002969.1  | 10.9  | 13  | 1.01  | 21   | 11.04  |   |
| 182 | AY172581.10     | 10.9  | 2   | 7.33  | 15   | 79.87  |   |
| 183 | Cebpa           | 10.82 | 27  | 2.52  | 200  | 27.23  |   |
| 184 | Srcin1          | 10.75 | 20  | 0.52  | 242  | 5.6    |   |
| 185 | Lrrc4b          | 10.66 | 8   | 0.55  | 45   | 5.9    |   |
| 186 | Hsd17b1         | 10.61 | 26  | 4.03  | 174  | 42.81  |   |
| 187 | Cgnl1           | 10.55 | 62  | 2.02  | 461  | 21.28  |   |
| 188 | Nrbp2           | 10.44 | 86  | 7.14  | 588  | 74.54  |   |
| 189 | Asphd2          | 10.38 | 18  | 1.2   | 128  | 12.5   |   |
| 190 | Hmgcs2          | 10.21 | 489 | 54.12 | 3312 | 552.64 |   |
| 191 | Abca8           | 10.17 | 4   | 0.1   | 24   | 1.04   |   |
| 192 | AC103129.2      | 10.17 | 0   | 0.17  | 0    | 1.73   |   |
| 193 | Adgrg3          | 10.17 | 10  | 0.08  | 29   | 0.81   |   |
| 194 | Tmem258         | 10.17 | 1   | 1.77  | 2    | 17.98  |   |
| 195 | AY172581.17     | 10.17 | 1   | 4.15  | 7    | 42.24  |   |
| 196 | Dnah11          | 10.17 | 10  | 0.02  | 25   | 0.19   |   |
| 197 | ENSRNOG00000051 | 10.17 | 1   | 0.8   | 7    | 8.12   |   |
| 198 | Fermt1          | 10.17 | 14  | 0.55  | 83   | 5.55   |   |
| 199 | Mcf2l           | 10.17 | 10  | 0.04  | 21   | 0.41   |   |
| 200 | Mctp2           | 10.17 | 11  | 0.03  | 30   | 0.29   |   |
| 201 | Pnmal2          | 10.17 | 2   | 0.19  | 14   | 1.97   |   |
| 202 | RT1-S3          | 10.17 | 1   | 0.14  | 5    | 1.43   |   |
| 203 | Rtp4            | 10.17 | 1   | 0.13  | 8    | 1.31   |   |
| 204 | Sik1            | 10.02 | 94  | 4.45  | 623  | 44.6   |   |
| 205 | Slc25a30        | 9.94  | 89  | 9.51  | 543  | 94.57  |   |
| 206 | Sostdc1         | 9.72  | 42  | 5.94  | 284  | 57.71  |   |
| 207 | Rims4           | 9.69  | 5   | 0.76  | 28   | 7.38   |   |
| 208 | Jak3            | 9.69  | 2   | 0.19  | 14   | 1.83   |   |
| 209 | Mgll            | 9.69  | 14  | 0.55  | 52   | 5.36   |   |
| 210 | Dnm1            | 9.45  | 6   | 0.16  | 23   | 1.47   |   |
| 211 | Mypop           | 9.45  | 5   | 0.12  | 20   | 1.12   |   |
| 212 | Abcc9           | 9.45  | 7   | 0.14  | 31   | 1.31   |   |

Supplemental Table 2  
Vehicle versus FSH, 24 hours

|     | A            | B    | C   | D       | E    | F       | G |
|-----|--------------|------|-----|---------|------|---------|---|
| 213 | Htr1b        | 9.45 | 4   | 0.65    | 26   | 6.12    |   |
| 214 | Kif26b       | 9.45 | 24  | 0.2     | 88   | 1.9     |   |
| 215 | Mt1_1        | 9.45 | 0   | 3.84    | 0    | 36.3    |   |
| 216 | RGD1563680   | 9.45 | 27  | 0.18    | 62   | 1.75    |   |
| 217 | Ifitm3       | 9.41 | 18  | 6.76    | 116  | 63.62   |   |
| 218 | Fam222a      | 9.39 | 24  | 1.79    | 123  | 16.83   |   |
| 219 | Inhbb        | 9.3  | 120 | 8.95    | 720  | 83.23   |   |
| 220 | Tnfaip6      | 9.2  | 6   | 0.55    | 22   | 5.05    |   |
| 221 | Trpm3        | 9.2  | 30  | 0.11    | 82   | 1.05    |   |
| 222 | Cbfa2t3      | 9.08 | 33  | 1.41    | 147  | 12.8    |   |
| 223 | Csdc2        | 8.83 | 64  | 5.25    | 379  | 46.38   |   |
| 224 | Cdo1         | 8.72 | 4   | 0.33    | 14   | 2.87    |   |
| 225 | Fgf22        | 8.72 | 25  | 0.51    | 24   | 4.44    |   |
| 226 | LOC100362409 | 8.72 | 0   | 0.33    | 0    | 2.87    |   |
| 227 | Slc25a21     | 8.72 | 12  | 0.12    | 20   | 1.03    |   |
| 228 | AC119015.2   | 8.72 | 14  | 0.86    | 37   | 7.47    |   |
| 229 | Aldh1a3      | 8.72 | 1   | 0.07    | 6    | 0.64    |   |
| 230 | Ccdc114      | 8.72 | 7   | 0.1     | 20   | 0.84    |   |
| 231 | Cdh1         | 8.72 | 2   | 0.06    | 7    | 0.49    |   |
| 232 | Cftr         | 8.72 | 4   | 0.04    | 12   | 0.32    |   |
| 233 | Chrne        | 8.72 | 2   | 0.14    | 8    | 1.22    |   |
| 234 | Gal3st4      | 8.72 | 3   | 0.11    | 8    | 0.98    |   |
| 235 | Gja4         | 8.72 | 1   | 0.16    | 6    | 1.37    |   |
| 236 | Igln5        | 8.72 | 2   | 0.49    | 12   | 4.3     |   |
| 237 | Kcnc2        | 8.72 | 18  | 0.07    | 27   | 0.59    |   |
| 238 | Kcnn1        | 8.72 | 3   | 0.09    | 8    | 0.82    |   |
| 239 | LOC100911963 | 8.72 | 0   | 0.24    | 0    | 2.12    |   |
| 240 | Nell1        | 8.72 | 16  | 0.09    | 36   | 0.75    |   |
| 241 | Nfkbil1      | 8.72 | 1   | 0.15    | 6    | 1.29    |   |
| 242 | Pcdh8        | 8.72 | 1   | 0.08    | 6    | 0.68    |   |
| 243 | Plxna4a      | 8.72 | 6   | 0.04    | 18   | 0.38    |   |
| 244 | Pramef8      | 8.72 | 0   | 0.07    | 3    | 0.59    |   |
| 245 | Ptgds        | 8.72 | 1   | 0.32    | 6    | 2.76    |   |
| 246 | Ptprz1       | 8.72 | 7   | 0.03    | 12   | 0.28    |   |
| 247 | Rab3il1      | 8.72 | 1   | 0.22    | 7    | 1.92    |   |
| 248 | SNORD74      | 8.72 | 1   | 3.08    | 6    | 26.82   |   |
| 249 | Spock2       | 8.72 | 22  | 1.56    | 83   | 13.6    |   |
| 250 | Sstr3        | 8.72 | 1   | 0.06    | 7    | 0.56    |   |
| 251 | Sybu         | 8.72 | 5   | 0.08    | 9    | 0.7     |   |
| 252 | Tgfb1        | 8.72 | 11  | 0.84    | 59   | 7.32    |   |
| 253 | Tmem184a     | 8.72 | 3   | 0.24    | 14   | 2.09    |   |
| 254 | Tmem198      | 8.72 | 3   | 0.31    | 19   | 2.73    |   |
| 255 | Tppp         | 8.72 | 2   | 0.2     | 8    | 1.73    |   |
| 256 | Ttyh2        | 8.72 | 5   | 0.36    | 27   | 3.17    |   |
| 257 | Efcc1        | 8.72 | 6   | 0.15    | 18   | 1.29    |   |
| 258 | SNORD71      | 8.72 | 1   | 2.97    | 6    | 25.86   |   |
| 259 | Gdpd5        | 8.63 | 21  | 1.26    | 113  | 10.87   |   |
| 260 | Greb1l       | 8.62 | 98  | 3.36    | 526  | 28.99   |   |
| 261 | Hba2         | 8.61 | 190 | 121.23  | 1074 | 1043.3  |   |
| 262 | Abi3bp       | 8.6  | 77  | 1.76    | 215  | 15.11   |   |
| 263 | 5_8S_rRNA_1  | 8.48 | 4   | 2177.35 | 14   | 18470.2 |   |
| 264 | Derl3        | 8.48 | 10  | 2.18    | 38   | 18.45   |   |
| 265 | Scg2         | 8.48 | 6   | 0.62    | 37   | 5.26    |   |
| 266 | Dapk1        | 8.4  | 52  | 1.74    | 287  | 14.6    |   |

Supplemental Table 2  
Vehicle versus FSH, 24 hours

|     | A              | B    | C   | D     | E    | F      | G |
|-----|----------------|------|-----|-------|------|--------|---|
| 267 | Phyhip_1       | 8.36 | 0   | 0.32  | 0    | 2.65   |   |
| 268 | Mro            | 8.32 | 26  | 2.68  | 132  | 22.32  |   |
| 269 | Kcng2          | 8.23 | 17  | 0.81  | 63   | 6.7    |   |
| 270 | Mgat3          | 8.23 | 3   | 0.28  | 17   | 2.3    |   |
| 271 | Micall2        | 8.23 | 7   | 0.23  | 22   | 1.91   |   |
| 272 | Tenm4          | 8.23 | 197 | 4.14  | 1056 | 34.08  |   |
| 273 | Col24a1        | 7.99 | 5   | 0.12  | 22   | 0.98   |   |
| 274 | Efcab6         | 7.99 | 9   | 0.1   | 21   | 0.84   |   |
| 275 | Slc46a3        | 7.99 | 5   | 0.21  | 12   | 1.65   |   |
| 276 | Tmtc2          | 7.96 | 132 | 5.17  | 670  | 41.14  |   |
| 277 | AY172581.21    | 7.91 | 26  | 94.75 | 145  | 749.64 |   |
| 278 | Dhrs3          | 7.91 | 10  | 1.08  | 63   | 8.53   |   |
| 279 | Abcc10         | 7.89 | 9   | 0.24  | 43   | 1.87   |   |
| 280 | Elmo1          | 7.82 | 86  | 5.6   | 457  | 43.85  |   |
| 281 | LOC501189      | 7.75 | 15  | 0.93  | 75   | 7.24   |   |
| 282 | Plau           | 7.75 | 26  | 3.19  | 131  | 24.72  |   |
| 283 | Chst15         | 7.72 | 39  | 1.35  | 157  | 10.43  |   |
| 284 | SNORD44_1      | 7.63 | 4   | 16.34 | 21   | 124.65 |   |
| 285 | Tst            | 7.63 | 30  | 6.38  | 140  | 48.7   |   |
| 286 | Ackr3          | 7.6  | 32  | 3.86  | 171  | 29.36  |   |
| 287 | Wnt5a          | 7.59 | 10  | 0.45  | 51   | 3.41   |   |
| 288 | Net1           | 7.58 | 108 | 8.18  | 559  | 62.05  |   |
| 289 | Gch1           | 7.56 | 11  | 0.84  | 46   | 6.35   |   |
| 290 | Sepp1          | 7.56 | 10  | 4.09  | 56   | 30.92  |   |
| 291 | Trim62         | 7.56 | 28  | 1.74  | 96   | 13.18  |   |
| 292 | Gem            | 7.52 | 18  | 2.61  | 96   | 19.6   |   |
| 293 | Selenbp1_2     | 7.5  | 0   | 5.33  | 0    | 39.97  |   |
| 294 | AABR07035065.1 | 7.27 | 1   | 0.16  | 4    | 1.17   |   |
| 295 | Ablim2         | 7.27 | 12  | 0.24  | 29   | 1.78   |   |
| 296 | Catsperd       | 7.27 | 17  | 0.36  | 65   | 2.61   |   |
| 297 | Fbxo36         | 7.27 | 17  | 0.23  | 33   | 1.64   |   |
| 298 | Fndc8          | 7.27 | 1   | 0.11  | 7    | 0.78   |   |
| 299 | Galnt12        | 7.27 | 1   | 0.14  | 5    | 1.04   |   |
| 300 | Gpx3           | 7.27 | 10  | 1.36  | 43   | 9.87   |   |
| 301 | Npas2          | 7.27 | 6   | 0.06  | 22   | 0.42   |   |
| 302 | Pianp          | 7.27 | 2   | 0.17  | 11   | 1.22   |   |
| 303 | Slc2a3         | 7.27 | 21  | 0.7   | 52   | 5.05   |   |
| 304 | Slc35g2        | 7.27 | 1   | 0.16  | 9    | 1.16   |   |
| 305 | Slc5a2         | 7.27 | 0   | 0.1   | 3    | 0.76   |   |
| 306 | SNORD45_2      | 7.27 | 0   | 3.08  | 0    | 22.35  |   |
| 307 | Tgfb3l         | 7.27 | 9   | 0.28  | 8    | 2.02   |   |
| 308 | A2m            | 7.27 | 0   | 0.05  | 1    | 0.4    |   |
| 309 | AABR07034293.1 | 7.27 | 0   | 0.43  | 2    | 3.09   |   |
| 310 | Ankrd55        | 7.27 | 10  | 0.09  | 20   | 0.63   |   |
| 311 | Ano3           | 7.27 | 11  | 0.04  | 13   | 0.3    |   |
| 312 | AY172581.14    | 7.27 | 1   | 3.32  | 5    | 24.14  |   |
| 313 | Cyp4f1         | 7.27 | 1   | 0.11  | 6    | 0.81   |   |
| 314 | Duoxa1         | 7.27 | 1   | 0.15  | 5    | 1.09   |   |
| 315 | Fam115c_1      | 7.27 | 0   | 0.23  | 2    | 1.65   |   |
| 316 | G0s2           | 7.27 | 1   | 0.34  | 5    | 2.48   |   |
| 317 | Itgb4          | 7.27 | 6   | 0.04  | 6    | 0.27   |   |
| 318 | Kcnh2          | 7.27 | 71  | 3.84  | 402  | 27.87  |   |
| 319 | LOC100362176   | 7.27 | 1   | 0.33  | 5    | 2.43   |   |
| 320 | Lypd3          | 7.27 | 3   | 0.15  | 5    | 1.08   |   |

Supplemental Table 2  
Vehicle versus FSH, 24 hours

|     | A              | B    | C   | D     | E    | F      | G |
|-----|----------------|------|-----|-------|------|--------|---|
| 321 | Nt5m           | 7.27 | 18  | 0.57  | 31   | 4.13   |   |
| 322 | Plip           | 7.27 | 6   | 0.17  | 12   | 1.23   |   |
| 323 | RGD1564469     | 7.27 | 1   | 0.3   | 5    | 2.16   |   |
| 324 | Rilp           | 7.27 | 1   | 0.23  | 8    | 1.64   |   |
| 325 | Sbsn           | 7.27 | 3   | 0.11  | 7    | 0.83   |   |
| 326 | SNORD83_2      | 7.27 | 0   | 6.31  | 0    | 45.83  |   |
| 327 | Ttc30b         | 7.27 | 5   | 0.49  | 18   | 3.52   |   |
| 328 | XAF1           | 7.27 | 26  | 0.91  | 34   | 6.63   |   |
| 329 | Zbtb7c         | 7.27 | 21  | 0.06  | 22   | 0.45   |   |
| 330 | Zfp605         | 7.27 | 2   | 0.15  | 10   | 1.12   |   |
| 331 | AABR07068163.1 | 7.27 | 2   | 0.26  | 9    | 1.9    |   |
| 332 | Slc25a18       | 7.27 | 4   | 0.13  | 8    | 0.92   |   |
| 333 | SNORA7_1       | 7.27 | 0   | 1.78  | 0    | 12.93  |   |
| 334 | Susd3          | 7.27 | 2   | 0.19  | 6    | 1.42   |   |
| 335 | Tcte1          | 7.27 | 3   | 0.15  | 17   | 1.11   |   |
| 336 | Zfp383_1       | 7.27 | 0   | 0.09  | 0    | 0.64   |   |
| 337 | Chst8          | 7.24 | 123 | 5.94  | 352  | 42.95  |   |
| 338 | Fdx1           | 7.17 | 55  | 8.52  | 241  | 61.1   |   |
| 339 | Rab7l1         | 7.12 | 40  | 5.57  | 196  | 39.65  |   |
| 340 | Ptgr1          | 7.04 | 18  | 2.63  | 77   | 18.51  |   |
| 341 | Cacna2d3       | 6.96 | 217 | 1.83  | 1614 | 12.71  |   |
| 342 | Celsr2         | 6.95 | 70  | 1.53  | 312  | 10.65  |   |
| 343 | Abo            | 6.9  | 4   | 0.6   | 19   | 4.13   |   |
| 344 | Trpt1          | 6.9  | 1   | 0.35  | 13   | 2.39   |   |
| 345 | Galnt6         | 6.85 | 9   | 0.46  | 43   | 3.15   |   |
| 346 | Tox            | 6.8  | 61  | 2.74  | 401  | 18.61  |   |
| 347 | Irf4           | 6.78 | 5   | 0.16  | 16   | 1.05   |   |
| 348 | Plxnc1         | 6.75 | 283 | 12.55 | 1297 | 84.67  |   |
| 349 | Fbxo44         | 6.7  | 41  | 5.86  | 175  | 39.31  |   |
| 350 | Emilin3        | 6.68 | 5   | 0.51  | 24   | 3.41   |   |
| 351 | AABR07028245.1 | 6.62 | 0   | 0.75  | 0    | 4.97   |   |
| 352 | Iqgap2         | 6.59 | 60  | 0.5   | 129  | 3.3    |   |
| 353 | 5_8S_rRNA_23   | 6.54 | 0   | 3.24  | 4    | 21.16  |   |
| 354 | Pcdhb5         | 6.54 | 2   | 0.19  | 6    | 1.26   |   |
| 355 | Slc7a4         | 6.54 | 6   | 0.64  | 27   | 4.15   |   |
| 356 | Spata18        | 6.54 | 2   | 0.24  | 11   | 1.55   |   |
| 357 | Zfp879         | 6.54 | 3   | 0.21  | 10   | 1.38   |   |
| 358 | Ppapdc1a       | 6.54 | 9   | 0.4   | 19   | 2.62   |   |
| 359 | SNORD29_1      | 6.54 | 1   | 7.79  | 9    | 50.92  |   |
| 360 | Prkce          | 6.48 | 34  | 1.67  | 89   | 10.85  |   |
| 361 | Mt1_2          | 6.44 | 3   | 5.01  | 10   | 32.25  |   |
| 362 | Clstn3         | 6.39 | 6   | 0.32  | 23   | 2.02   |   |
| 363 | Lmo2           | 6.39 | 6   | 0.68  | 31   | 4.35   |   |
| 364 | AABR07011951.1 | 6.39 | 2   | 10.46 | 24   | 66.83  |   |
| 365 | Caskin1        | 6.37 | 21  | 0.55  | 75   | 3.48   |   |
| 366 | Rap1gap2       | 6.36 | 46  | 0.87  | 148  | 5.55   |   |
| 367 | Nr5a1          | 6.36 | 210 | 19.53 | 863  | 124.12 |   |
| 368 | Egfr           | 6.35 | 115 | 4.85  | 460  | 30.83  |   |
| 369 | Cmpk2          | 6.3  | 3   | 0.19  | 13   | 1.23   |   |
| 370 | MacroD1        | 6.3  | 18  | 0.58  | 41   | 3.63   |   |
| 371 | Slc27a1        | 6.3  | 172 | 12.2  | 703  | 76.82  |   |
| 372 | SNORD87        | 6.3  | 0   | 8.79  | 0    | 55.38  |   |
| 373 | Ypel1          | 6.3  | 10  | 2.03  | 27   | 12.76  |   |
| 374 | Enpp2          | 6.3  | 6   | 0.28  | 13   | 1.77   |   |

Supplemental Table 2  
Vehicle versus FSH, 24 hours

|     | A              | B    | C   | D     | E    | F      | G |
|-----|----------------|------|-----|-------|------|--------|---|
| 375 | Sord           | 6.21 | 41  | 3.85  | 188  | 23.89  |   |
| 376 | Sema6d         | 6.18 | 12  | 0.32  | 37   | 1.99   |   |
| 377 | B4galt1        | 6.17 | 445 | 29.91 | 1462 | 184.59 |   |
| 378 | Fam122b        | 6.1  | 0   | 0.45  | 1    | 2.77   |   |
| 379 | Omd            | 6.1  | 0   | 1.96  | 1    | 11.97  |   |
| 380 | Gramd1b        | 6.09 | 78  | 3.61  | 311  | 21.99  |   |
| 381 | Sbk1           | 6.06 | 0   | 1.79  | 0    | 10.88  |   |
| 382 | Thnsl2         | 6.02 | 15  | 0.96  | 54   | 5.8    |   |
| 383 | Olfml2a        | 5.99 | 8   | 0.34  | 35   | 2.03   |   |
| 384 | Phyhipl        | 5.99 | 18  | 1.23  | 65   | 7.37   |   |
| 385 | Lhpp           | 5.97 | 18  | 1.37  | 65   | 8.17   |   |
| 386 | Fam46c         | 5.92 | 37  | 3.33  | 120  | 19.69  |   |
| 387 | Boc            | 5.92 | 22  | 0.84  | 84   | 4.98   |   |
| 388 | Fam43a         | 5.87 | 24  | 2.51  | 97   | 14.73  |   |
| 389 | AABR07041096.1 | 5.86 | 31  | 1.62  | 113  | 9.49   |   |
| 390 | AABR07036331.2 | 5.81 | 63  | 0.26  | 80   | 1.49   |   |
| 391 | AABR07043169.1 | 5.81 | 1   | 0.53  | 4    | 3.09   |   |
| 392 | AABR07051326.1 | 5.81 | 1   | 0.09  | 2    | 0.53   |   |
| 393 | Aurkc          | 5.81 | 18  | 1.12  | 31   | 6.54   |   |
| 394 | Bcl11b         | 5.81 | 6   | 0.04  | 4    | 0.25   |   |
| 395 | Cabp4          | 5.81 | 6   | 0.35  | 20   | 2.01   |   |
| 396 | Ccdc28b        | 5.81 | 9   | 0.81  | 21   | 4.71   |   |
| 397 | Chrd           | 5.81 | 3   | 0.15  | 8    | 0.89   |   |
| 398 | Duox2          | 5.81 | 1   | 0.04  | 5    | 0.26   |   |
| 399 | Egflam         | 5.81 | 6   | 0.06  | 11   | 0.33   |   |
| 400 | Eml6           | 5.81 | 25  | 0.07  | 30   | 0.43   |   |
| 401 | Hfe            | 5.81 | 1   | 0.1   | 5    | 0.61   |   |
| 402 | Kcnk5          | 5.81 | 7   | 0.36  | 22   | 2.09   |   |
| 403 | Kdm4d_1        | 5.81 | 1   | 0.11  | 4    | 0.62   |   |
| 404 | LOC100909593   | 5.81 | 0   | 0.17  | 0    | 0.99   |   |
| 405 | Lrfn5          | 5.81 | 13  | 0.08  | 12   | 0.48   |   |
| 406 | Mei1           | 5.81 | 7   | 0.06  | 10   | 0.36   |   |
| 407 | Mfsd4          | 5.81 | 13  | 0.28  | 7    | 1.61   |   |
| 408 | Nudt15         | 5.81 | 7   | 0.23  | 17   | 1.36   |   |
| 409 | Plac1_1        | 5.81 | 1   | 0.24  | 2    | 1.37   |   |
| 410 | Plet1          | 5.81 | 1   | 0.16  | 4    | 0.96   |   |
| 411 | Prdm8          | 5.81 | 3   | 0.12  | 4    | 0.7    |   |
| 412 | Prss36         | 5.81 | 7   | 0.18  | 9    | 1.05   |   |
| 413 | Rab40b         | 5.81 | 5   | 0.13  | 12   | 0.77   |   |
| 414 | RGD1561157     | 5.81 | 1   | 0.3   | 4    | 1.73   |   |
| 415 | Rn60_10_0699.2 | 5.81 | 1   | 0.47  | 4    | 2.73   |   |
| 416 | Spint1         | 5.81 | 1   | 0.1   | 3    | 0.6    |   |
| 417 | Spint3         | 5.81 | 6   | 0.94  | 8    | 5.49   |   |
| 418 | Tle2           | 5.81 | 6   | 0.35  | 17   | 2.04   |   |
| 419 | Tmem151b       | 5.81 | 5   | 0.15  | 8    | 0.86   |   |
| 420 | Tnfsf10        | 5.81 | 9   | 0.45  | 30   | 2.64   |   |
| 421 | Tshr           | 5.81 | 9   | 0.05  | 10   | 0.27   |   |
| 422 | Ufsp1          | 5.81 | 1   | 0.38  | 4    | 2.21   |   |
| 423 | Xpa            | 5.81 | 42  | 0.21  | 39   | 1.2    |   |
| 424 | 7SK_400        | 5.81 | 0   | 0.78  | 0    | 4.55   |   |
| 425 | AABR07015719.1 | 5.81 | 0   | 0.54  | 0    | 3.13   |   |
| 426 | AABR07017110.1 | 5.81 | 0   | 0.28  | 0    | 1.6    |   |
| 427 | AABR07028970.2 | 5.81 | 8   | 0.81  | 7    | 4.69   |   |
| 428 | AABR07072761.1 | 5.81 | 1   | 0.29  | 1    | 1.68   |   |



Supplemental Table 2  
Vehicle versus FSH, 24 hours

|     | A              | B    | C    | D      | E    | F      | G |
|-----|----------------|------|------|--------|------|--------|---|
| 429 | AC107531.2     | 5.81 | 1    | 0.28   | 4    | 1.65   |   |
| 430 | AC111319.3     | 5.81 | 0    | 0.81   | 0    | 4.73   |   |
| 431 | Ctf1           | 5.81 | 3    | 0.36   | 8    | 2.07   |   |
| 432 | Cux2           | 5.81 | 16   | 0.1    | 17   | 0.57   |   |
| 433 | Dcxr           | 5.81 | 2    | 0.44   | 8    | 2.54   |   |
| 434 | Dlg2           | 5.81 | 19   | 0.1    | 22   | 0.57   |   |
| 435 | Dnajb13        | 5.81 | 6    | 0.11   | 7    | 0.64   |   |
| 436 | Flywch2        | 5.81 | 2    | 0.4    | 8    | 2.35   |   |
| 437 | Hist1h1d       | 5.81 | 1    | 0.38   | 4    | 2.19   |   |
| 438 | Kif17          | 5.81 | 8    | 0.14   | 13   | 0.78   |   |
| 439 | Lancl3         | 5.81 | 11   | 0.2    | 12   | 1.15   |   |
| 440 | LOC100361240   | 5.81 | 0    | 0.99   | 3    | 5.75   |   |
| 441 | LOC100912338   | 5.81 | 1    | 0.65   | 4    | 3.8    |   |
| 442 | LOC500331      | 5.81 | 32   | 0.41   | 78   | 2.4    |   |
| 443 | Lppr3          | 5.81 | 2    | 0.2    | 4    | 1.14   |   |
| 444 | Matk           | 5.81 | 3    | 0.15   | 6    | 0.89   |   |
| 445 | Msr1           | 5.81 | 166  | 0.04   | 173  | 0.25   |   |
| 446 | Mtmr7          | 5.81 | 14   | 0.09   | 9    | 0.52   |   |
| 447 | Pde9a          | 5.81 | 5    | 0.22   | 18   | 1.28   |   |
| 448 | Plekhn1        | 5.81 | 10   | 0.18   | 19   | 1.03   |   |
| 449 | Plp1           | 5.81 | 9    | 0.49   | 27   | 2.86   |   |
| 450 | Pmch           | 5.81 | 0    | 0.11   | 0    | 0.65   |   |
| 451 | Prg4           | 5.81 | 3    | 0.16   | 12   | 0.91   |   |
| 452 | Slc8a3         | 5.81 | 44   | 0.06   | 80   | 0.33   |   |
| 453 | SNORD14_4      | 5.81 | 0    | 2.97   | 0    | 17.24  |   |
| 454 | Spn            | 5.81 | 1    | 0.06   | 4    | 0.37   |   |
| 455 | Thsd1          | 5.81 | 4    | 0.06   | 11   | 0.34   |   |
| 456 | Tmem220        | 5.81 | 3    | 0.43   | 6    | 2.51   |   |
| 457 | Zfp353         | 5.81 | 1    | 0.16   | 4    | 0.91   |   |
| 458 | Gria1          | 5.68 | 28   | 0.92   | 69   | 5.23   |   |
| 459 | Rmdn2          | 5.64 | 29   | 2.03   | 174  | 11.48  |   |
| 460 | Igdcc4         | 5.64 | 88   | 4.49   | 320  | 25.33  |   |
| 461 | AC106663.1     | 5.63 | 0    | 0.72   | 0    | 4.06   |   |
| 462 | C1qtnf6        | 5.63 | 8    | 0.67   | 31   | 3.78   |   |
| 463 | Ifi2712b       | 5.59 | 40   | 17.68  | 125  | 98.75  |   |
| 464 | Faah_2         | 5.57 | 3    | 0.42   | 8    | 2.33   |   |
| 465 | Tert           | 5.57 | 10   | 0.44   | 31   | 2.47   |   |
| 466 | Mzf1           | 5.57 | 11   | 0.41   | 34   | 2.31   |   |
| 467 | Ccbe1          | 5.56 | 97   | 19.21  | 346  | 106.73 |   |
| 468 | Tmem216        | 5.55 | 17   | 2.09   | 44   | 11.61  |   |
| 469 | AABR07027870.1 | 5.52 | 6    | 0.4    | 11   | 2.23   |   |
| 470 | C4b            | 5.52 | 4    | 0.23   | 11   | 1.29   |   |
| 471 | LOC102555919   | 5.52 | 8    | 0.29   | 20   | 1.62   |   |
| 472 | Kcnma1         | 5.5  | 66   | 0.73   | 141  | 4.04   |   |
| 473 | Selenbp1_1     | 5.48 | 0    | 8.83   | 0    | 48.44  |   |
| 474 | Adgrg1         | 5.45 | 1769 | 107.52 | 6393 | 585.93 |   |
| 475 | Angptl1        | 5.45 | 60   | 0.39   | 122  | 2.14   |   |
| 476 | Pard6a         | 5.45 | 4    | 0.28   | 12   | 1.52   |   |
| 477 | Tmem14a        | 5.45 | 3    | 0.92   | 13   | 5.02   |   |
| 478 | Dfnb31         | 5.42 | 80   | 3.23   | 283  | 17.47  |   |
| 479 | Gstt3          | 5.4  | 9    | 0.98   | 31   | 5.27   |   |
| 480 | Lrrn3          | 5.39 | 216  | 15.98  | 788  | 86.21  |   |
| 481 | Abhd8          | 5.39 | 50   | 5.61   | 179  | 30.28  |   |
| 482 | AC126892.1     | 5.39 | 0    | 1.89   | 0    | 10.19  |   |

Supplemental Table 2  
Vehicle versus FSH, 24 hours

|     | A              | B    | C   | D     | E    | F      | G |
|-----|----------------|------|-----|-------|------|--------|---|
| 483 | Bckdha         | 5.39 | 77  | 8.15  | 265  | 43.92  |   |
| 484 | Pfkm           | 5.38 | 240 | 17.67 | 841  | 95.1   |   |
| 485 | Cybrd1         | 5.37 | 15  | 0.83  | 53   | 4.45   |   |
| 486 | Adck1          | 5.33 | 27  | 1.08  | 59   | 5.74   |   |
| 487 | Ccpg1os        | 5.33 | 3   | 1.01  | 11   | 5.4    |   |
| 488 | Lrrc56         | 5.33 | 7   | 0.35  | 7    | 1.87   |   |
| 489 | Magee2         | 5.33 | 3   | 0.35  | 11   | 1.87   |   |
| 490 | Matn2          | 5.33 | 160 | 0.86  | 158  | 4.57   |   |
| 491 | Tmem56         | 5.33 | 4   | 0.71  | 13   | 3.78   |   |
| 492 | Rn60_13_0839.5 | 5.23 | 20  | 0.88  | 54   | 4.61   |   |
| 493 | Tmem79         | 5.23 | 3   | 0.2   | 9    | 1.07   |   |
| 494 | Inhba          | 5.2  | 640 | 57.66 | 2225 | 299.69 |   |
| 495 | Aldh3b1        | 5.19 | 6   | 0.79  | 13   | 4.1    |   |
| 496 | Acad10         | 5.18 | 46  | 2.02  | 149  | 10.45  |   |
| 497 | Trim2          | 5.18 | 152 | 4.77  | 492  | 24.71  |   |
| 498 | AABR07064724.1 | 5.15 | 0   | 34.26 | 1    | 176.51 |   |
| 499 | Mmp11          | 5.13 | 296 | 45.58 | 1028 | 233.77 |   |
| 500 | Irs3           | 5.09 | 4   | 0.51  | 14   | 2.57   |   |
| 501 | Lace1          | 5.09 | 35  | 0.58  | 42   | 2.94   |   |
| 502 | LOC100361636   | 5.09 | 0   | 0.2   | 1    | 1.02   |   |
| 503 | Mrpl53_1       | 5.09 | 0   | 1.38  | 0    | 7.04   |   |
| 504 | Pcdhga3        | 5.09 | 2   | 0.21  | 7    | 1.05   |   |
| 505 | AABR07027212.1 | 5.09 | 3   | 2.24  | 7    | 11.42  |   |
| 506 | Arg2           | 5.09 | 15  | 0.33  | 17   | 1.66   |   |
| 507 | Arrb2          | 5.09 | 20  | 2.63  | 59   | 13.36  |   |
| 508 | Astn2          | 5.09 | 43  | 0.11  | 79   | 0.56   |   |
| 509 | Ceacam18       | 5.09 | 7   | 0.44  | 9    | 2.23   |   |
| 510 | Cradd          | 5.09 | 10  | 0.63  | 15   | 3.2    |   |
| 511 | Cubn           | 5.09 | 6   | 0.04  | 11   | 0.22   |   |
| 512 | Dmtn           | 5.09 | 6   | 0.15  | 7    | 0.75   |   |
| 513 | Efna1          | 5.09 | 5   | 0.65  | 14   | 3.3    |   |
| 514 | Rad9b          | 5.09 | 19  | 0.29  | 29   | 1.47   |   |
| 515 | Rn60_X_0224.3  | 5.09 | 25  | 0.76  | 38   | 3.88   |   |
| 516 | SNORD100       | 5.09 | 0   | 6.64  | 0    | 33.79  |   |
| 517 | Dhh            | 5.04 | 17  | 1.71  | 62   | 8.62   |   |
| 518 | Tmem252        | 5.03 | 16  | 1.56  | 48   | 7.84   |   |
| 519 | Slc7a7         | 4.98 | 20  | 0.98  | 42   | 4.88   |   |
| 520 | Tmem38b        | 4.97 | 109 | 9.02  | 355  | 44.85  |   |
| 521 | Papln          | 4.96 | 30  | 0.65  | 54   | 3.24   |   |
| 522 | Usp49          | 4.95 | 53  | 1.49  | 164  | 7.36   |   |
| 523 | Csrnp3         | 4.94 | 85  | 2.46  | 334  | 12.14  |   |
| 524 | Ephx2          | 4.94 | 7   | 0.59  | 20   | 2.9    |   |
| 525 | Irak2          | 4.94 | 14  | 0.42  | 33   | 2.09   |   |
| 526 | Kcnab1         | 4.94 | 77  | 1.07  | 208  | 5.29   |   |
| 527 | Brms1_2        | 4.94 | 0   | 1.69  | 0    | 8.34   |   |
| 528 | Prkar2b        | 4.94 | 822 | 53.14 | 2893 | 262.47 |   |
| 529 | Sesn3          | 4.92 | 74  | 5.72  | 257  | 28.14  |   |
| 530 | Gstt2          | 4.91 | 31  | 3.81  | 90   | 18.7   |   |
| 531 | Gpcpd1         | 4.88 | 68  | 3.26  | 232  | 15.9   |   |
| 532 | Ihh            | 4.88 | 17  | 1.54  | 48   | 7.49   |   |
| 533 | Atp2b4         | 4.85 | 191 | 4.99  | 602  | 24.23  |   |
| 534 | Fuca1          | 4.85 | 385 | 56.08 | 1301 | 272.09 |   |
| 535 | AABR07045680.1 | 4.84 | 5   | 0.94  | 14   | 4.55   |   |
| 536 | AABR07062344.2 | 4.84 | 0   | 0.89  | 6    | 4.3    |   |

Supplemental Table 2  
Vehicle versus FSH, 24 hours

|     | A              | B    | C   | D      | E    | F       | G |
|-----|----------------|------|-----|--------|------|---------|---|
| 537 | C1rl           | 4.84 | 9   | 0.64   | 28   | 3.11    |   |
| 538 | Pelo           | 4.84 | 1   | 0.47   | 6    | 2.27    |   |
| 539 | Pth1r          | 4.84 | 7   | 0.34   | 13   | 1.64    |   |
| 540 | Snai2          | 4.84 | 3   | 0.38   | 10   | 1.85    |   |
| 541 | Tmem218        | 4.84 | 3   | 0.58   | 15   | 2.83    |   |
| 542 | AABR07008379.1 | 4.84 | 0   | 1.71   | 1    | 8.27    |   |
| 543 | Lce1m          | 4.84 | 5   | 0.9    | 11   | 4.37    |   |
| 544 | S100b          | 4.84 | 4   | 0.5    | 11   | 2.44    |   |
| 545 | Slc25a35       | 4.84 | 6   | 0.88   | 25   | 4.25    |   |
| 546 | Slco5a1        | 4.84 | 46  | 1.3    | 134  | 6.3     |   |
| 547 | Tekt1          | 4.84 | 4   | 0.52   | 20   | 2.53    |   |
| 548 | Tprkb_1        | 4.84 | 0   | 0.46   | 3    | 2.23    |   |
| 549 | Msh2           | 4.81 | 145 | 10.47  | 474  | 50.39   |   |
| 550 | Brd8           | 4.8  | 367 | 18.95  | 1240 | 90.89   |   |
| 551 | Adck5          | 4.74 | 120 | 7.65   | 419  | 36.27   |   |
| 552 | Zfp647         | 4.72 | 0   | 0.62   | 0    | 2.93    |   |
| 553 | Coch           | 4.72 | 16  | 0.41   | 17   | 1.95    |   |
| 554 | Hdhd3          | 4.72 | 4   | 0.84   | 13   | 3.99    |   |
| 555 | Tex9           | 4.72 | 21  | 0.6    | 33   | 2.85    |   |
| 556 | Zcchc24        | 4.69 | 56  | 2.25   | 148  | 10.56   |   |
| 557 | Ptpn4          | 4.67 | 395 | 6.81   | 1186 | 31.79   |   |
| 558 | Dach1          | 4.65 | 52  | 1.56   | 119  | 7.27    |   |
| 559 | Sod3           | 4.65 | 5   | 0.72   | 16   | 3.35    |   |
| 560 | Zfp347         | 4.63 | 14  | 2.29   | 38   | 10.59   |   |
| 561 | Acss3          | 4.63 | 66  | 2.09   | 193  | 9.68    |   |
| 562 | Rassf2         | 4.62 | 24  | 1.24   | 58   | 5.74    |   |
| 563 | Sifn3          | 4.6  | 7   | 0.28   | 21   | 1.31    |   |
| 564 | Bst2           | 4.58 | 143 | 41.68  | 451  | 190.77  |   |
| 565 | Havcr1         | 4.57 | 18  | 0.89   | 43   | 4.07    |   |
| 566 | Hdac4          | 4.54 | 203 | 6.86   | 604  | 31.16   |   |
| 567 | Fhdc1          | 4.54 | 63  | 2.97   | 173  | 13.49   |   |
| 568 | Fth1           | 4.53 | 515 | 574.28 | 1539 | 2602.97 |   |
| 569 | RT1-CE5        | 4.52 | 8   | 2.43   | 14   | 10.98   |   |
| 570 | 7SK_212        | 4.48 | 41  | 88.83  | 102  | 398.17  |   |
| 571 | Vwa5a_2        | 4.47 | 0   | 2.11   | 4    | 9.45    |   |
| 572 | Fkbp5          | 4.45 | 237 | 16.18  | 726  | 71.94   |   |
| 573 | Ablim1         | 4.42 | 421 | 11.64  | 1246 | 51.52   |   |
| 574 | Slc25a23       | 4.4  | 51  | 4.64   | 144  | 20.43   |   |
| 575 | Ssbp4          | 4.38 | 74  | 10.67  | 197  | 46.77   |   |
| 576 | AABR07012583.3 | 4.36 | 8   | 1.41   | 15   | 6.14    |   |
| 577 | AABR07038021.1 | 4.36 | 4   | 0.16   | 4    | 0.7     |   |
| 578 | Ccdc69         | 4.36 | 2   | 0.35   | 18   | 1.51    |   |
| 579 | LOC100362333   | 4.36 | 0   | 0.57   | 0    | 2.48    |   |
| 580 | Rn60_12_0174.2 | 4.36 | 1   | 0.24   | 1    | 1.04    |   |
| 581 | AABR07000550.1 | 4.36 | 1   | 0.59   | 3    | 2.57    |   |
| 582 | AABR07000699.1 | 4.36 | 0   | 0.23   | 0    | 0.98    |   |
| 583 | AABR07020860.1 | 4.36 | 0   | 0.07   | 1    | 0.32    |   |
| 584 | AABR07022162.1 | 4.36 | 1   | 0.12   | 3    | 0.51    |   |
| 585 | AABR07024907.1 | 4.36 | 0   | 0.74   | 0    | 3.2     |   |
| 586 | AABR07038019.1 | 4.36 | 0   | 0.51   | 0    | 2.23    |   |
| 587 | AABR07043772.1 | 4.36 | 1   | 0.18   | 3    | 0.8     |   |
| 588 | AABR07050407.1 | 4.36 | 0   | 0.28   | 1    | 1.2     |   |
| 589 | AABR07051376.1 | 4.36 | 8   | 0.37   | 7    | 1.61    |   |
| 590 | AABR07055801.1 | 4.36 | 1   | 0.89   | 4    | 3.89    |   |

Supplemental Table 2  
Vehicle versus FSH, 24 hours

|     | A               | B    | C  | D     | E  | F      | G |
|-----|-----------------|------|----|-------|----|--------|---|
| 591 | Abat            | 4.36 | 9  | 0.09  | 14 | 0.41   |   |
| 592 | Ablim3          | 4.36 | 2  | 0.1   | 8  | 0.43   |   |
| 593 | AC108546.1      | 4.36 | 0  | 0.34  | 0  | 1.49   |   |
| 594 | AC110981.1      | 4.36 | 1  | 0.3   | 1  | 1.29   |   |
| 595 | AC111781.1      | 4.36 | 1  | 0.2   | 3  | 0.87   |   |
| 596 | AC118794.1      | 4.36 | 6  | 0.02  | 6  | 0.09   |   |
| 597 | AC126148.2      | 4.36 | 4  | 0.98  | 5  | 4.26   |   |
| 598 | Adcy5           | 4.36 | 59 | 0.82  | 90 | 3.58   |   |
| 599 | Adhfe1          | 4.36 | 2  | 0.13  | 14 | 0.55   |   |
| 600 | Armc2           | 4.36 | 7  | 0.07  | 8  | 0.29   |   |
| 601 | Arsi            | 4.36 | 1  | 0.14  | 3  | 0.63   |   |
| 602 | AY172581.2      | 4.36 | 17 | 62.29 | 51 | 271.55 |   |
| 603 | Camk2b          | 4.36 | 8  | 0.06  | 15 | 0.26   |   |
| 604 | Cdh18           | 4.36 | 14 | 0.11  | 17 | 0.47   |   |
| 605 | Cdh5            | 4.36 | 1  | 0.06  | 6  | 0.27   |   |
| 606 | Cdhr2           | 4.36 | 4  | 0.19  | 11 | 0.83   |   |
| 607 | Comp            | 4.36 | 2  | 0.09  | 4  | 0.39   |   |
| 608 | Creb3l4         | 4.36 | 0  | 0.09  | 1  | 0.41   |   |
| 609 | Cyp2r1          | 4.36 | 1  | 0.15  | 4  | 0.64   |   |
| 610 | Cyp2t1          | 4.36 | 4  | 0.53  | 20 | 2.3    |   |
| 611 | Cyp3a9_1        | 4.36 | 1  | 0.15  | 3  | 0.65   |   |
| 612 | Dnajc6          | 4.36 | 3  | 0.05  | 7  | 0.21   |   |
| 613 | Drp2            | 4.36 | 4  | 0.04  | 7  | 0.16   |   |
| 614 | Ebf3            | 4.36 | 1  | 0.05  | 4  | 0.22   |   |
| 615 | ENSRNOG00000050 | 4.36 | 1  | 0.11  | 3  | 0.46   |   |
| 616 | Esrrg           | 4.36 | 6  | 0.05  | 10 | 0.2    |   |
| 617 | Fam227b         | 4.36 | 4  | 0.14  | 18 | 0.6    |   |
| 618 | Far2            | 4.36 | 5  | 0.06  | 8  | 0.25   |   |
| 619 | Frmppd1         | 4.36 | 3  | 0.11  | 6  | 0.49   |   |
| 620 | Gchfr           | 4.36 | 1  | 0.39  | 3  | 1.72   |   |
| 621 | Gda             | 4.36 | 1  | 0.15  | 18 | 0.65   |   |
| 622 | Gna14           | 4.36 | 6  | 0.09  | 6  | 0.4    |   |
| 623 | Hapln2          | 4.36 | 5  | 0.18  | 4  | 0.78   |   |
| 624 | Hhip1           | 4.36 | 2  | 0.1   | 3  | 0.46   |   |
| 625 | Hsbp111         | 4.36 | 1  | 0.63  | 5  | 2.73   |   |
| 626 | Hvcn1           | 4.36 | 7  | 0.21  | 11 | 0.92   |   |
| 627 | Ism2            | 4.36 | 3  | 0.17  | 5  | 0.74   |   |
| 628 | Ln timer        | 4.36 | 24 | 0.4   | 53 | 1.76   |   |
| 629 | LOC100360619    | 4.36 | 1  | 0.81  | 1  | 3.52   |   |
| 630 | LOC100909485    | 4.36 | 0  | 0.32  | 0  | 1.39   |   |
| 631 | LOC100909752    | 4.36 | 1  | 0.05  | 2  | 0.21   |   |
| 632 | LOC100911545    | 4.36 | 0  | 0.06  | 0  | 0.25   |   |
| 633 | LOC681458       | 4.36 | 1  | 0.07  | 4  | 0.3    |   |
| 634 | LOC687679       | 4.36 | 0  | 1.96  | 1  | 8.53   |   |
| 635 | Lpxn            | 4.36 | 4  | 0.14  | 4  | 0.63   |   |
| 636 | Lrrc27          | 4.36 | 4  | 0.2   | 11 | 0.87   |   |
| 637 | Lrrc73          | 4.36 | 3  | 0.19  | 3  | 0.84   |   |
| 638 | Lrtomt          | 4.36 | 3  | 0.28  | 3  | 1.24   |   |
| 639 | Lztfl1          | 4.36 | 7  | 1.04  | 22 | 4.54   |   |
| 640 | Mapk12          | 4.36 | 1  | 0.11  | 4  | 0.5    |   |
| 641 | Morn1           | 4.36 | 51 | 0.24  | 70 | 1.05   |   |
| 642 | Mx1             | 4.36 | 1  | 0.08  | 8  | 0.33   |   |
| 643 | Myom3           | 4.36 | 9  | 0.12  | 7  | 0.5    |   |
| 644 | Nlrp5           | 4.36 | 7  | 0.08  | 5  | 0.37   |   |

Supplemental Table 2  
Vehicle versus FSH, 24 hours

|     | A            | B    | C    | D     | E    | F      | G |
|-----|--------------|------|------|-------|------|--------|---|
| 645 | Nova2        | 4.36 | 8    | 0.68  | 19   | 2.94   |   |
| 646 | Ntn3         | 4.36 | 1    | 0.1   | 4    | 0.45   |   |
| 647 | Nxnl2        | 4.36 | 40   | 3.36  | 73   | 14.63  |   |
| 648 | P2rx3        | 4.36 | 4    | 0.06  | 4    | 0.28   |   |
| 649 | Plcb2        | 4.36 | 1    | 0.07  | 3    | 0.31   |   |
| 650 | Ppp1r14a     | 4.36 | 2    | 0.33  | 6    | 1.46   |   |
| 651 | Prex1        | 4.36 | 2    | 0.05  | 8    | 0.22   |   |
| 652 | RGD1310110   | 4.36 | 21   | 1.94  | 58   | 8.47   |   |
| 653 | RGD1560289   | 4.36 | 11   | 0.18  | 11   | 0.8    |   |
| 654 | RGD1561444   | 4.36 | 25   | 0.35  | 37   | 1.51   |   |
| 655 | RGD1563905   | 4.36 | 1    | 0.43  | 2    | 1.86   |   |
| 656 | Rln1         | 4.36 | 1    | 0.31  | 3    | 1.37   |   |
| 657 | Rnf208       | 4.36 | 2    | 0.44  | 7    | 1.91   |   |
| 658 | Scn2b        | 4.36 | 7    | 1.68  | 27   | 7.33   |   |
| 659 | Sdsl         | 4.36 | 5    | 0.36  | 9    | 1.58   |   |
| 660 | Sec14l2      | 4.36 | 5    | 0.19  | 12   | 0.84   |   |
| 661 | Sema6c       | 4.36 | 3    | 0.15  | 8    | 0.66   |   |
| 662 | Sftpd        | 4.36 | 1    | 0.07  | 4    | 0.3    |   |
| 663 | Shbg         | 4.36 | 1    | 0.17  | 3    | 0.72   |   |
| 664 | Sirt4        | 4.36 | 8    | 0.29  | 6    | 1.28   |   |
| 665 | Slc16a6      | 4.36 | 6    | 0.2   | 10   | 0.86   |   |
| 666 | Smpd5        | 4.36 | 2    | 0.27  | 5    | 1.19   |   |
| 667 | SNORND104_2  | 4.36 | 1    | 3.56  | 3    | 15.52  |   |
| 668 | Ssc5d        | 4.36 | 4    | 0.11  | 11   | 0.48   |   |
| 669 | Tbxa2r       | 4.36 | 6    | 0.26  | 6    | 1.15   |   |
| 670 | Tcf23        | 4.36 | 2    | 0.06  | 4    | 0.24   |   |
| 671 | Ticam2       | 4.36 | 13   | 0.38  | 28   | 1.64   |   |
| 672 | Tnfrsf4      | 4.36 | 3    | 0.25  | 4    | 1.07   |   |
| 673 | Trim45       | 4.36 | 5    | 0.43  | 15   | 1.88   |   |
| 674 | Trim69       | 4.36 | 1    | 0.05  | 3    | 0.22   |   |
| 675 | Tssk6        | 4.36 | 1    | 0.19  | 3    | 0.83   |   |
| 676 | Tsx          | 4.36 | 1    | 0.31  | 6    | 1.37   |   |
| 677 | Upp2         | 4.36 | 3    | 0.1   | 5    | 0.43   |   |
| 678 | Utf1         | 4.36 | 1    | 0.24  | 3    | 1.05   |   |
| 679 | Wif1         | 4.36 | 2    | 0.11  | 4    | 0.48   |   |
| 680 | Zfp763       | 4.36 | 4    | 0.57  | 11   | 2.49   |   |
| 681 | Zfp94_2      | 4.36 | 3    | 0.33  | 9    | 1.45   |   |
| 682 | ACEA_U3_5    | 4.36 | 0    | 1.15  | 0    | 5.03   |   |
| 683 | Camkk1       | 4.36 | 2    | 0.13  | 5    | 0.57   |   |
| 684 | Dhdh         | 4.36 | 28   | 1.49  | 54   | 6.5    |   |
| 685 | Fam229b      | 4.36 | 1    | 0.37  | 3    | 1.62   |   |
| 686 | Gpr157       | 4.36 | 3    | 0.11  | 3    | 0.46   |   |
| 687 | Hamp         | 4.36 | 4    | 2.08  | 12   | 9.05   |   |
| 688 | Haus2_2      | 4.36 | 2    | 0.99  | 3    | 4.31   |   |
| 689 | Hpse         | 4.36 | 4    | 0.15  | 5    | 0.68   |   |
| 690 | Lag3         | 4.36 | 2    | 0.13  | 4    | 0.58   |   |
| 691 | LOC100911851 | 4.36 | 0    | 0.06  | 0    | 0.27   |   |
| 692 | Mag          | 4.36 | 3    | 0.1   | 3    | 0.42   |   |
| 693 | Mtnr1a       | 4.36 | 1    | 0.14  | 5    | 0.61   |   |
| 694 | Rftn2        | 4.36 | 6    | 0.17  | 9    | 0.73   |   |
| 695 | RGD1563482   | 4.36 | 18   | 0.48  | 45   | 2.11   |   |
| 696 | Greb1        | 4.34 | 1495 | 40.75 | 4244 | 176.77 |   |
| 697 | Fam78a       | 4.33 | 61   | 5.41  | 173  | 23.46  |   |
| 698 | Rps6ka5      | 4.29 | 78   | 1.96  | 237  | 8.4    |   |

Supplemental Table 2  
Vehicle versus FSH, 24 hours

|     | A              | B    | C   | D      | E   | F      | G |
|-----|----------------|------|-----|--------|-----|--------|---|
| 699 | Zfp691         | 4.29 | 23  | 3.76   | 65  | 16.13  |   |
| 700 | Ifitm1         | 4.29 | 19  | 8.77   | 58  | 37.61  |   |
| 701 | RGD1562618     | 4.28 | 70  | 2.02   | 218 | 8.64   |   |
| 702 | Amhr2          | 4.27 | 66  | 6.13   | 175 | 26.19  |   |
| 703 | Gpam           | 4.26 | 219 | 16.75  | 668 | 71.35  |   |
| 704 | Mycn           | 4.25 | 15  | 1.24   | 40  | 5.27   |   |
| 705 | Ednrb          | 4.22 | 263 | 23.49  | 731 | 99.14  |   |
| 706 | Nudt12         | 4.21 | 12  | 0.64   | 33  | 2.7    |   |
| 707 | Trpv4          | 4.21 | 11  | 0.78   | 35  | 3.27   |   |
| 708 | Tmem176a       | 4.21 | 81  | 18.23  | 237 | 76.77  |   |
| 709 | Zmym3          | 4.21 | 257 | 10.37  | 754 | 43.65  |   |
| 710 | Tgfbr3         | 4.2  | 141 | 4.95   | 403 | 20.78  |   |
| 711 | Hmgb3_2        | 4.2  | 2   | 1.39   | 3   | 5.83   |   |
| 712 | Lrrc16b        | 4.2  | 11  | 0.5    | 29  | 2.11   |   |
| 713 | Slit3          | 4.2  | 21  | 0.39   | 32  | 1.63   |   |
| 714 | Syng1          | 4.2  | 22  | 1.87   | 56  | 7.84   |   |
| 715 | Slfn5          | 4.19 | 28  | 1.1    | 79  | 4.61   |   |
| 716 | Hap1           | 4.19 | 26  | 1.17   | 49  | 4.92   |   |
| 717 | Pld1           | 4.17 | 172 | 5.63   | 464 | 23.48  |   |
| 718 | Nfkb1a         | 4.17 | 51  | 7.16   | 135 | 29.84  |   |
| 719 | Hmgb1          | 4.15 | 33  | 2.46   | 67  | 10.21  |   |
| 720 | Faxdc2         | 4.15 | 74  | 3.65   | 98  | 15.13  |   |
| 721 | Lrfn3          | 4.15 | 10  | 0.74   | 22  | 3.07   |   |
| 722 | Gria3          | 4.14 | 189 | 3.58   | 468 | 14.85  |   |
| 723 | Alk            | 4.13 | 59  | 0.99   | 163 | 4.09   |   |
| 724 | Grk5           | 4.13 | 44  | 2.01   | 153 | 8.31   |   |
| 725 | AABR07029907.2 | 4.12 | 0   | 19.17  | 0   | 78.91  |   |
| 726 | Dcaf12l1       | 4.12 | 12  | 0.85   | 34  | 3.49   |   |
| 727 | LOC501110      | 4.12 | 18  | 0.74   | 41  | 3.06   |   |
| 728 | Olfm2          | 4.12 | 15  | 0.3    | 24  | 1.22   |   |
| 729 | Ppara          | 4.12 | 18  | 0.7    | 43  | 2.89   |   |
| 730 | Slc25a42       | 4.12 | 34  | 2.13   | 87  | 8.78   |   |
| 731 | Fam210b        | 4.11 | 205 | 25.35  | 585 | 104.25 |   |
| 732 | AABR07026311.1 | 4.1  | 3   | 3.4    | 10  | 13.94  |   |
| 733 | Adam8          | 4.07 | 14  | 0.89   | 48  | 3.64   |   |
| 734 | Cbln1          | 4.07 | 31  | 3.06   | 88  | 12.44  |   |
| 735 | Cyb5d1         | 4.07 | 7   | 1.81   | 17  | 7.38   |   |
| 736 | Cyp2s1         | 4.07 | 9   | 0.47   | 19  | 1.93   |   |
| 737 | Rnase4         | 4.07 | 7   | 4.49   | 11  | 18.29  |   |
| 738 | Rnf157         | 4.07 | 8   | 0.58   | 21  | 2.37   |   |
| 739 | Shpk           | 4.07 | 11  | 0.42   | 19  | 1.69   |   |
| 740 | Taco1          | 4.07 | 7   | 0.83   | 18  | 3.37   |   |
| 741 | Fam69b         | 4.05 | 25  | 2.14   | 58  | 8.66   |   |
| 742 | Ankrd54        | 4.05 | 13  | 1.58   | 39  | 6.41   |   |
| 743 | Gdf1           | 4.04 | 30  | 0.85   | 41  | 3.41   |   |
| 744 | SNORD47_2      | 4.04 | 36  | 115    | 95  | 464.19 |   |
| 745 | Man1a1         | 4.03 | 118 | 3.62   | 308 | 14.62  |   |
| 746 | LOC287167      | 4    | 297 | 178.31 | 818 | 713.17 |   |
| 747 | Cx3cl1         | 4    | 15  | 0.96   | 34  | 3.82   |   |
| 748 | Dnah1          | 4    | 6   | 0.07   | 14  | 0.29   |   |
| 749 | Man1c1         | 4    | 11  | 0.24   | 19  | 0.96   |   |
| 750 | Ndst2          | 4    | 0   | 0.29   | 0   | 1.16   |   |
| 751 | Hp             | 4    | 13  | 2.53   | 38  | 10.13  |   |
| 752 | Osgin1         | 4    | 4   | 0.45   | 12  | 1.81   |   |

Supplemental Table 2  
Vehicle versus FSH, 24 hours

|     | A              | B    | C   | D     | E    | F      | G |
|-----|----------------|------|-----|-------|------|--------|---|
| 753 | Slc7a2         | 4    | 7   | 0.38  | 18   | 1.51   |   |
| 754 | Alas1          | 3.98 | 445 | 50.35 | 1262 | 200.34 |   |
| 755 | Mycl           | 3.98 | 26  | 1.61  | 52   | 6.4    |   |
| 756 | Ndr3           | 3.98 | 21  | 4.55  | 63   | 18.09  |   |
| 757 | Pde7b          | 3.97 | 484 | 10.28 | 1064 | 40.79  |   |
| 758 | Tsen34_2       | 3.96 | 0   | 2.04  | 0    | 8.08   |   |
| 759 | Acacb          | 3.96 | 44  | 0.97  | 115  | 3.84   |   |
| 760 | Fshr           | 3.96 | 48  | 1.9   | 134  | 7.5    |   |
| 761 | Tmem164        | 3.95 | 132 | 4.11  | 330  | 16.22  |   |
| 762 | AABR07064716.2 | 3.94 | 0   | 21.8  | 0    | 85.99  |   |
| 763 | Ncam2          | 3.94 | 20  | 0.35  | 51   | 1.37   |   |
| 764 | Tmtc4          | 3.93 | 136 | 11.35 | 366  | 44.66  |   |
| 765 | Plbd1          | 3.93 | 145 | 17.16 | 410  | 67.46  |   |
| 766 | Dpf1           | 3.93 | 23  | 1.8   | 47   | 7.09   |   |
| 767 | Apc2           | 3.92 | 12  | 0.25  | 28   | 0.99   |   |
| 768 | Tox2           | 3.89 | 68  | 4.56  | 197  | 17.73  |   |
| 769 | Crym           | 3.88 | 172 | 31.46 | 451  | 122.09 |   |
| 770 | B3gnt7         | 3.88 | 101 | 9.55  | 263  | 37.07  |   |
| 771 | LOC100911750   | 3.87 | 0   | 0.38  | 0    | 1.46   |   |
| 772 | AABR07012065.1 | 3.87 | 10  | 1.8   | 24   | 6.97   |   |
| 773 | Alkbh6_2       | 3.87 | 0   | 1.04  | 0    | 4.02   |   |
| 774 | Kcnk12         | 3.87 | 85  | 1.19  | 124  | 4.6    |   |
| 775 | Lipg           | 3.87 | 12  | 0.81  | 38   | 3.15   |   |
| 776 | Magi2          | 3.87 | 28  | 0.18  | 70   | 0.69   |   |
| 777 | Pip5k1b        | 3.87 | 19  | 0.26  | 34   | 1      |   |
| 778 | RGD1561333     | 3.87 | 0   | 3.86  | 1    | 14.97  |   |
| 779 | Scn3b          | 3.87 | 4   | 0.19  | 19   | 0.75   |   |
| 780 | Slc3a1         | 3.87 | 16  | 0.32  | 45   | 1.23   |   |
| 781 | Zcchc12        | 3.87 | 9   | 1.07  | 24   | 4.16   |   |
| 782 | Zdhc24         | 3.87 | 16  | 0.89  | 26   | 3.46   |   |
| 783 | Zfp945         | 3.87 | 6   | 0.69  | 16   | 2.66   |   |
| 784 | Nat8l          | 3.87 | 3   | 0.23  | 8    | 0.88   |   |
| 785 | P2ry4          | 3.87 | 3   | 0.64  | 7    | 2.46   |   |
| 786 | Pi16           | 3.87 | 3   | 0.4   | 12   | 1.54   |   |
| 787 | Syn2           | 3.87 | 21  | 0.28  | 28   | 1.1    |   |
| 788 | Phyh           | 3.86 | 102 | 12.75 | 293  | 49.2   |   |
| 789 | Prdm11         | 3.83 | 25  | 0.45  | 51   | 1.72   |   |
| 790 | Nr5a2          | 3.83 | 338 | 12.85 | 940  | 49.14  |   |
| 791 | Hadh           | 3.8  | 77  | 10.21 | 187  | 38.85  |   |
| 792 | Dhtkd1         | 3.8  | 19  | 0.75  | 40   | 2.83   |   |
| 793 | Phactr1        | 3.79 | 53  | 3.59  | 113  | 13.64  |   |
| 794 | Xylt1          | 3.79 | 96  | 7.93  | 268  | 30.06  |   |
| 795 | Slc25a10       | 3.79 | 35  | 3.64  | 80   | 13.79  |   |
| 796 | AABR07069454.1 | 3.78 | 5   | 0.56  | 14   | 2.1    |   |
| 797 | Epb4114b       | 3.78 | 15  | 0.17  | 28   | 0.65   |   |
| 798 | AABR07065498.1 | 3.78 | 18  | 0.96  | 26   | 3.64   |   |
| 799 | Galnt16        | 3.78 | 85  | 0.32  | 26   | 1.22   |   |
| 800 | LOC100912534   | 3.78 | 1   | 1.58  | 2    | 5.96   |   |
| 801 | Prss35         | 3.76 | 586 | 46.39 | 1524 | 174.55 |   |
| 802 | Fam188b        | 3.76 | 42  | 1.5   | 90   | 5.66   |   |
| 803 | N4bp3_2        | 3.76 | 0   | 1.14  | 1    | 4.3    |   |
| 804 | Akr1c19        | 3.75 | 29  | 2.21  | 81   | 8.28   |   |
| 805 | Gnrhr          | 3.74 | 455 | 36.76 | 1159 | 137.62 |   |
| 806 | Dhrs1          | 3.74 | 74  | 5.15  | 126  | 19.26  |   |

Supplemental Table 2  
Vehicle versus FSH, 24 hours

|     | A              | B    | C    | D      | E    | F      | G |
|-----|----------------|------|------|--------|------|--------|---|
| 807 | Mafb           | 3.74 | 7    | 0.91   | 17   | 3.41   |   |
| 808 | 09/02/15       | 3.74 | 8    | 1.73   | 19   | 6.47   |   |
| 809 | Dhrs11         | 3.74 | 41   | 2.48   | 47   | 9.27   |   |
| 810 | Parp10         | 3.74 | 28   | 1.82   | 67   | 6.82   |   |
| 811 | Tmem246        | 3.73 | 72   | 10.14  | 182  | 37.84  |   |
| 812 | Aldh2          | 3.73 | 211  | 24.97  | 528  | 93.22  |   |
| 813 | Usp27x         | 3.73 | 23   | 3.05   | 59   | 11.36  |   |
| 814 | Creg1          | 3.72 | 1068 | 123.81 | 2710 | 461.14 |   |
| 815 | Socs3          | 3.71 | 9    | 2.6    | 23   | 9.65   |   |
| 816 | Mgat5          | 3.71 | 89   | 5.56   | 220  | 20.59  |   |
| 817 | Mccc2          | 3.7  | 96   | 7.63   | 219  | 28.2   |   |
| 818 | Ephx1          | 3.68 | 171  | 20.74  | 420  | 76.29  |   |
| 819 | AC141169.2     | 3.67 | 31   | 1.07   | 63   | 3.91   |   |
| 820 | Nudt16l1       | 3.67 | 11   | 4.14   | 25   | 15.19  |   |
| 821 | Nol4l          | 3.65 | 54   | 6.12   | 101  | 22.36  |   |
| 822 | 1110034G24Rik  | 3.63 | 28   | 1.48   | 42   | 5.38   |   |
| 823 | AABR07001064.1 | 3.63 | 1    | 0.18   | 1    | 0.65   |   |
| 824 | AABR07059171.1 | 3.63 | 0    | 0.56   | 1    | 2.04   |   |
| 825 | Cp             | 3.63 | 16   | 0.66   | 28   | 2.39   |   |
| 826 | Gtf2ird2       | 3.63 | 78   | 3.87   | 168  | 14.04  |   |
| 827 | LOC691921      | 3.63 | 11   | 1.33   | 20   | 4.83   |   |
| 828 | Pcdhb14        | 3.63 | 2    | 0.21   | 4    | 0.76   |   |
| 829 | Ropn1l         | 3.63 | 2    | 0.48   | 5    | 1.75   |   |
| 830 | Slc44a3        | 3.63 | 8    | 0.27   | 10   | 1      |   |
| 831 | Vstm2b         | 3.63 | 6    | 0.49   | 14   | 1.77   |   |
| 832 | AABR07031184.1 | 3.63 | 0    | 1.43   | 1    | 5.2    |   |
| 833 | AC111257.2     | 3.63 | 0    | 0.18   | 0    | 0.67   |   |
| 834 | Ankrd37        | 3.63 | 3    | 0.57   | 6    | 2.08   |   |
| 835 | Arntl2         | 3.63 | 11   | 0.25   | 22   | 0.91   |   |
| 836 | Bzrap1         | 3.63 | 3    | 0.09   | 5    | 0.33   |   |
| 837 | Cln3           | 3.63 | 29   | 3.27   | 60   | 11.9   |   |
| 838 | Cpne7          | 3.63 | 5    | 0.21   | 7    | 0.75   |   |
| 839 | Fbxl16         | 3.63 | 2    | 0.35   | 4    | 1.26   |   |
| 840 | Fhl4           | 3.63 | 2    | 0.26   | 6    | 0.94   |   |
| 841 | Gabrg1         | 3.63 | 5    | 0.57   | 19   | 2.08   |   |
| 842 | Hcn4           | 3.63 | 3    | 0.09   | 6    | 0.33   |   |
| 843 | Hilpda         | 3.63 | 4    | 3.91   | 9    | 14.2   |   |
| 844 | Hyal1          | 3.63 | 3    | 0.3    | 5    | 1.08   |   |
| 845 | Kbtbd6_1       | 3.63 | 0    | 0.68   | 0    | 2.46   |   |
| 846 | LOC100911393_2 | 3.63 | 0    | 1.1    | 0    | 4      |   |
| 847 | LOC102554591   | 3.63 | 17   | 0.11   | 14   | 0.39   |   |
| 848 | Mapk4          | 3.63 | 2    | 0.11   | 6    | 0.39   |   |
| 849 | Notch3         | 3.63 | 6    | 0.2    | 15   | 0.74   |   |
| 850 | Padi4          | 3.63 | 150  | 0.22   | 152  | 0.8    |   |
| 851 | Pxmp2          | 3.63 | 10   | 0.55   | 20   | 1.98   |   |
| 852 | Rac3           | 3.63 | 5    | 1.73   | 11   | 6.29   |   |
| 853 | RGD1305587     | 3.63 | 4    | 0.81   | 9    | 2.93   |   |
| 854 | Rpl8           | 3.63 | 0    | 4.51   | 0    | 16.37  |   |
| 855 | Scnn1a         | 3.63 | 4    | 0.15   | 6    | 0.54   |   |
| 856 | Shc2           | 3.63 | 4    | 0.13   | 7    | 0.46   |   |
| 857 | SNORD58_1      | 3.63 | 2    | 7.55   | 5    | 27.43  |   |
| 858 | Vpreb3         | 3.63 | 5    | 1.55   | 13   | 5.64   |   |
| 859 | Zc3h12b        | 3.63 | 4    | 0.31   | 12   | 1.14   |   |
| 860 | Zfp74_2        | 3.63 | 0    | 0.24   | 0    | 0.88   |   |



Supplemental Table 2  
Vehicle versus FSH, 24 hours

|     | A              | B    | C   | D     | E    | F     | G |
|-----|----------------|------|-----|-------|------|-------|---|
| 861 | AABR07031674.3 | 3.63 | 0   | 1.63  | 0    | 5.92  |   |
| 862 | Cd40           | 3.63 | 2   | 0.36  | 5    | 1.31  |   |
| 863 | Efnb3          | 3.63 | 2   | 0.16  | 5    | 0.58  |   |
| 864 | L2hgdh         | 3.63 | 8   | 0.31  | 12   | 1.11  |   |
| 865 | Poli           | 3.63 | 5   | 0.39  | 11   | 1.43  |   |
| 866 | Reep6          | 3.63 | 8   | 0.7   | 17   | 2.56  |   |
| 867 | Tmem53         | 3.63 | 29  | 0.7   | 46   | 2.53  |   |
| 868 | Zfp324         | 3.63 | 1   | 0.29  | 3    | 1.04  |   |
| 869 | Gusb           | 3.63 | 125 | 9.72  | 303  | 35.26 |   |
| 870 | Sema7a         | 3.6  | 171 | 14.16 | 395  | 50.95 |   |
| 871 | Slc44a2        | 3.59 | 103 | 6.92  | 255  | 24.86 |   |
| 872 | Mrc2           | 3.59 | 176 | 6.71  | 418  | 24.13 |   |
| 873 | Vkorc1         | 3.59 | 36  | 3.55  | 86   | 12.75 |   |
| 874 | Rn60_1_0959.1  | 3.57 | 1   | 0.52  | 8    | 1.87  |   |
| 875 | Smpdl3a        | 3.57 | 13  | 1.54  | 28   | 5.49  |   |
| 876 | Lipe           | 3.57 | 33  | 0.74  | 51   | 2.64  |   |
| 877 | Itm2c          | 3.56 | 613 | 78.99 | 1508 | 281.4 |   |
| 878 | Dpyd           | 3.56 | 68  | 1.14  | 126  | 4.07  |   |
| 879 | Rbbp9          | 3.55 | 82  | 9.11  | 188  | 32.35 |   |
| 880 | Pgap2          | 3.53 | 27  | 1.31  | 57   | 4.61  |   |
| 881 | Psd            | 3.53 | 8   | 0.44  | 20   | 1.54  |   |
| 882 | Zdhhc18        | 3.53 | 38  | 3.52  | 55   | 12.43 |   |
| 883 | Zfp521         | 3.53 | 192 | 3.27  | 390  | 11.55 |   |
| 884 | Slc26a2        | 3.52 | 48  | 3.29  | 109  | 11.58 |   |
| 885 | Cyp27a1        | 3.51 | 47  | 3.94  | 114  | 13.84 |   |
| 886 | Adcy9          | 3.51 | 152 | 5.3   | 334  | 18.59 |   |
| 887 | Mfap3l         | 3.5  | 27  | 2.85  | 70   | 9.97  |   |
| 888 | Efnb1          | 3.5  | 95  | 7.1   | 225  | 24.86 |   |
| 889 | Ptpv           | 3.49 | 16  | 0.65  | 40   | 2.27  |   |
| 890 | AABR07069473.1 | 3.49 | 11  | 0.41  | 14   | 1.44  |   |
| 891 | Map4k1         | 3.49 | 8   | 0.44  | 15   | 1.55  |   |
| 892 | Pex11g         | 3.49 | 37  | 1.08  | 46   | 3.77  |   |
| 893 | Prodh          | 3.49 | 8   | 0.53  | 18   | 1.86  |   |
| 894 | RGD1304810     | 3.49 | 23  | 0.5   | 35   | 1.74  |   |
| 895 | RGD1306001     | 3.49 | 10  | 1.37  | 16   | 4.77  |   |
| 896 | Slc25a28       | 3.49 | 104 | 10.73 | 254  | 37.43 |   |
| 897 | Tubd1          | 3.49 | 11  | 0.86  | 15   | 2.99  |   |
| 898 | RGD1565368     | 3.48 | 12  | 46.05 | 36   | 160.1 |   |
| 899 | Mfsd12         | 3.47 | 42  | 4.9   | 94   | 17.01 |   |
| 900 | Lhfpl2         | 3.46 | 85  | 4     | 186  | 13.83 |   |
| 901 | Angpt2         | 3.46 | 10  | 2.14  | 29   | 7.41  |   |
| 902 | Gfpt2          | 3.46 | 39  | 2.41  | 84   | 8.34  |   |
| 903 | AABR07009106.2 | 3.45 | 8   | 0.98  | 17   | 3.37  |   |
| 904 | Gstz1          | 3.45 | 35  | 3.18  | 68   | 10.99 |   |
| 905 | Cntnap1        | 3.45 | 9   | 0.37  | 23   | 1.28  |   |
| 906 | Cep70          | 3.45 | 20  | 0.68  | 35   | 2.36  |   |
| 907 | Kcnk1          | 3.45 | 16  | 0.78  | 21   | 2.7   |   |
| 908 | Zadh2          | 3.45 | 90  | 4.38  | 188  | 15.1  |   |
| 909 | Gstm5          | 3.43 | 11  | 2.86  | 26   | 9.83  |   |
| 910 | Igsf11         | 3.43 | 448 | 19.15 | 979  | 65.65 |   |
| 911 | AABR07062513.1 | 3.43 | 24  | 0.57  | 42   | 1.94  |   |
| 912 | Snx21          | 3.43 | 39  | 1.88  | 67   | 6.45  |   |
| 913 | Fbln1          | 3.42 | 39  | 2.4   | 77   | 8.21  |   |
| 914 | Ddx26b         | 3.42 | 64  | 1.59  | 104  | 5.45  |   |

Supplemental Table 2  
Vehicle versus FSH, 24 hours

|     | A              | B    | C    | D      | E    | F       | G |
|-----|----------------|------|------|--------|------|---------|---|
| 915 | AC135696.1     | 3.41 | 8    | 2.24   | 18   | 7.66    |   |
| 916 | 5_8S_rRNA_14   | 3.41 | 0    | 395.73 | 0    | 1351.25 |   |
| 917 | Map3k5         | 3.4  | 212  | 6.38   | 471  | 21.7    |   |
| 918 | Madd           | 3.4  | 74   | 2.86   | 179  | 9.72    |   |
| 919 | Abcc4          | 3.39 | 66   | 2.5    | 141  | 8.48    |   |
| 920 | Slc24a4        | 3.39 | 31   | 1.2    | 57   | 4.06    |   |
| 921 | Arsg           | 3.39 | 12   | 0.22   | 32   | 0.73    |   |
| 922 | Bbs5           | 3.39 | 10   | 1.09   | 37   | 3.71    |   |
| 923 | Ccdc170        | 3.39 | 5    | 0.7    | 13   | 2.39    |   |
| 924 | Gprc5b         | 3.39 | 11   | 0.26   | 20   | 0.88    |   |
| 925 | Igsf1          | 3.39 | 3    | 0.17   | 9    | 0.58    |   |
| 926 | Mov10          | 3.39 | 173  | 8.63   | 359  | 29.27   |   |
| 927 | Nfe2           | 3.39 | 6    | 0.45   | 8    | 1.53    |   |
| 928 | Paqr7          | 3.39 | 56   | 5.02   | 120  | 17.03   |   |
| 929 | Scn4b          | 3.39 | 24   | 1.4    | 60   | 4.75    |   |
| 930 | Tmem19         | 3.39 | 5    | 1.18   | 19   | 4.01    |   |
| 931 | 7SK_368        | 3.39 | 0    | 2.21   | 3    | 7.5     |   |
| 932 | AABR07072539.1 | 3.39 | 2    | 0.84   | 3    | 2.86    |   |
| 933 | AC107580.4     | 3.39 | 0    | 0.49   | 0    | 1.67    |   |
| 934 | Asap3          | 3.39 | 7    | 0.28   | 20   | 0.93    |   |
| 935 | Celf5          | 3.39 | 5    | 0.17   | 10   | 0.58    |   |
| 936 | Hdx            | 3.39 | 7    | 0.33   | 15   | 1.12    |   |
| 937 | LOC100362724   | 3.39 | 0    | 0.72   | 0    | 2.43    |   |
| 938 | LOC687399      | 3.39 | 4    | 0.5    | 10   | 1.7     |   |
| 939 | Nlgn3          | 3.39 | 10   | 0.56   | 24   | 1.91    |   |
| 940 | Nsun3          | 3.39 | 13   | 0.81   | 16   | 2.75    |   |
| 941 | Rapgef5        | 3.39 | 12   | 0.14   | 17   | 0.47    |   |
| 942 | Sez6l          | 3.39 | 7    | 0.16   | 15   | 0.53    |   |
| 943 | Sfrp1          | 3.39 | 3    | 0.19   | 7    | 0.65    |   |
| 944 | Slc22a17       | 3.39 | 84   | 6.72   | 177  | 22.77   |   |
| 945 | snosnR60_Z15_3 | 3.39 | 1    | 9.23   | 0    | 31.29   |   |
| 946 | 5_8S_rRNA_30   | 3.39 | 0    | 402.25 | 0    | 1363.08 |   |
| 947 | Dtx3l          | 3.38 | 91   | 4.15   | 199  | 14.06   |   |
| 948 | Tmem206        | 3.38 | 171  | 26.1   | 400  | 88.31   |   |
| 949 | Bambi          | 3.38 | 172  | 27.53  | 408  | 93.11   |   |
| 950 | Pitpnm3        | 3.37 | 51   | 1.16   | 101  | 3.9     |   |
| 951 | Agbl5          | 3.37 | 101  | 2.13   | 115  | 7.17    |   |
| 952 | LOC690000      | 3.37 | 28   | 2.58   | 68   | 8.7     |   |
| 953 | Itn2b          | 3.36 | 2067 | 276    | 4686 | 927.35  |   |
| 954 | Pyroxd2        | 3.36 | 54   | 3.67   | 122  | 12.32   |   |
| 955 | Neto2          | 3.35 | 41   | 3.63   | 79   | 12.16   |   |
| 956 | Zfp385b        | 3.34 | 168  | 3.7    | 444  | 12.36   |   |
| 957 | Arrdc4         | 3.33 | 23   | 0.99   | 49   | 3.29    |   |
| 958 | Eci1           | 3.33 | 143  | 30.08  | 327  | 100.2   |   |
| 959 | LOC100911867   | 3.33 | 43   | 2.09   | 107  | 6.94    |   |
| 960 | MGC112715      | 3.32 | 2    | 0.93   | 7    | 3.1     |   |
| 961 | Msr2           | 3.32 | 19   | 1.52   | 32   | 5.05    |   |
| 962 | Pkhd11l        | 3.32 | 14   | 0.13   | 27   | 0.44    |   |
| 963 | Rbl2           | 3.31 | 100  | 3.85   | 213  | 12.74   |   |
| 964 | Glb1l          | 3.31 | 28   | 1.94   | 52   | 6.44    |   |
| 965 | Slc16a2        | 3.31 | 66   | 3.91   | 137  | 12.92   |   |
| 966 | Hist1h4b_6     | 3.3  | 10   | 2.11   | 22   | 6.98    |   |
| 967 | Lrrc4c         | 3.3  | 20   | 0.97   | 45   | 3.22    |   |
| 968 | Tef            | 3.3  | 94   | 4.61   | 209  | 15.22   |   |

Supplemental Table 2  
Vehicle versus FSH, 24 hours

|      | A              | B    | C   | D      | E   | F       | G |
|------|----------------|------|-----|--------|-----|---------|---|
| 969  | Abca2          | 3.3  | 288 | 8.67   | 647 | 28.62   |   |
| 970  | Ppt2           | 3.3  | 25  | 7.38   | 99  | 24.34   |   |
| 971  | Ebf4           | 3.29 | 44  | 2.81   | 82  | 9.25    |   |
| 972  | Hmgcl          | 3.29 | 26  | 3.19   | 55  | 10.49   |   |
| 973  | Oplah          | 3.29 | 27  | 1.34   | 65  | 4.39    |   |
| 974  | Rps4x          | 3.27 | 0   | 23.33  | 0   | 76.36   |   |
| 975  | Csmd2          | 3.27 | 23  | 0.1    | 28  | 0.31    |   |
| 976  | AABR07028795.2 | 3.27 | 8   | 0.56   | 13  | 1.84    |   |
| 977  | Amigo2         | 3.27 | 8   | 0.64   | 18  | 2.11    |   |
| 978  | Cd99l2_1       | 3.27 | 2   | 0.47   | 10  | 1.54    |   |
| 979  | Gfra3          | 3.27 | 5   | 0.45   | 9   | 1.47    |   |
| 980  | Lynx1          | 3.27 | 5   | 0.26   | 12  | 0.86    |   |
| 981  | Mtcp1_2        | 3.27 | 4   | 3.57   | 9   | 11.68   |   |
| 982  | Nhej1          | 3.27 | 18  | 0.71   | 19  | 2.31    |   |
| 983  | Nr3c2          | 3.27 | 26  | 0.76   | 49  | 2.48    |   |
| 984  | RGD1565367     | 3.27 | 13  | 0.5    | 21  | 1.64    |   |
| 985  | SNORD26        | 3.27 | 4   | 13.29  | 9   | 43.45   |   |
| 986  | SNORD66        | 3.27 | 0   | 26.58  | 0   | 86.9    |   |
| 987  | Sparcl1        | 3.27 | 5   | 0.36   | 16  | 1.19    |   |
| 988  | Trim34         | 3.27 | 26  | 1.55   | 44  | 5.08    |   |
| 989  | Zfp961         | 3.27 | 4   | 0.79   | 10  | 2.57    |   |
| 990  | Dennd3         | 3.27 | 12  | 0.35   | 24  | 1.14    |   |
| 991  | Zfp667         | 3.27 | 5   | 0.3    | 14  | 0.96    |   |
| 992  | Rn5-8s         | 3.27 | 0   | 385.96 | 0   | 1261.32 |   |
| 993  | Gamt           | 3.26 | 68  | 11.3   | 151 | 36.88   |   |
| 994  | Abcc3          | 3.26 | 130 | 3.41   | 227 | 11.13   |   |
| 995  | Stk17b         | 3.26 | 50  | 3.13   | 104 | 10.2    |   |
| 996  | Slc36a1        | 3.25 | 49  | 2.74   | 93  | 8.91    |   |
| 997  | Abtb1          | 3.25 | 38  | 3.96   | 79  | 12.86   |   |
| 998  | LOC102556347   | 3.24 | 5   | 5.85   | 21  | 18.94   |   |
| 999  | Slc46a1        | 3.24 | 26  | 2.41   | 61  | 7.78    |   |
| 1000 | Ldhb           | 3.23 | 190 | 32.35  | 424 | 104.57  |   |
| 1001 | Nkd1           | 3.22 | 57  | 4.48   | 157 | 14.45   |   |
| 1002 | GImp           | 3.22 | 52  | 28.88  | 132 | 92.94   |   |
| 1003 | Zfp184         | 3.22 | 119 | 1.7    | 176 | 5.45    |   |
| 1004 | Gcdh           | 3.21 | 34  | 4.39   | 88  | 14.1    |   |
| 1005 | Fut8           | 3.21 | 152 | 11.28  | 339 | 36.25   |   |
| 1006 | Fbxo31         | 3.21 | 50  | 3.57   | 88  | 11.43   |   |
| 1007 | Rnf122         | 3.21 | 49  | 5.32   | 89  | 17.06   |   |
| 1008 | Dnajc28        | 3.2  | 5   | 0.88   | 11  | 2.82    |   |
| 1009 | Dok2           | 3.2  | 5   | 0.44   | 14  | 1.42    |   |
| 1010 | Gsap           | 3.2  | 11  | 0.33   | 18  | 1.06    |   |
| 1011 | Ogdhl          | 3.2  | 69  | 4.47   | 150 | 14.29   |   |
| 1012 | Prrx1          | 3.2  | 20  | 1.45   | 21  | 4.62    |   |
| 1013 | Shisa7         | 3.2  | 5   | 0.2    | 14  | 0.65    |   |
| 1014 | Bphl           | 3.2  | 24  | 2.11   | 45  | 6.74    |   |
| 1015 | Calr3          | 3.2  | 6   | 0.89   | 12  | 2.85    |   |
| 1016 | Gpr162         | 3.2  | 10  | 0.43   | 18  | 1.39    |   |
| 1017 | Ift27          | 3.2  | 14  | 2.44   | 27  | 7.8     |   |
| 1018 | Phf7           | 3.2  | 20  | 1.5    | 33  | 4.81    |   |
| 1019 | Supt7l         | 3.2  | 4   | 0.65   | 9   | 2.08    |   |
| 1020 | Slc41a3        | 3.19 | 113 | 6.87   | 210 | 21.92   |   |
| 1021 | Nphp4          | 3.18 | 43  | 1.34   | 88  | 4.24    |   |
| 1022 | Naglu          | 3.17 | 67  | 6.18   | 143 | 19.59   |   |

Supplemental Table 2  
Vehicle versus FSH, 24 hours

|      | A              | B    | C   | D      | E   | F       | G |
|------|----------------|------|-----|--------|-----|---------|---|
| 1023 | LOC100912282   | 3.16 | 0   | 6.46   | 1   | 20.44   |   |
| 1024 | Fam84b         | 3.15 | 41  | 10.95  | 89  | 34.54   |   |
| 1025 | Tmem150a       | 3.15 | 74  | 12.2   | 161 | 38.45   |   |
| 1026 | Tmem176b       | 3.15 | 251 | 34.35  | 517 | 108.21  |   |
| 1027 | Tm7sf3         | 3.15 | 35  | 2.92   | 65  | 9.2     |   |
| 1028 | 5_8S_rRNA_13   | 3.15 | 0   | 400.62 | 0   | 1261.32 |   |
| 1029 | AABR07072266.1 | 3.15 | 0   | 2.4    | 0   | 7.54    |   |
| 1030 | Bcl7a          | 3.15 | 12  | 2.36   | 42  | 7.44    |   |
| 1031 | Ech1           | 3.15 | 85  | 16.55  | 174 | 52.12   |   |
| 1032 | Galm           | 3.15 | 57  | 3.88   | 92  | 12.2    |   |
| 1033 | Styx11         | 3.15 | 36  | 0.91   | 47  | 2.87    |   |
| 1034 | Enpp5          | 3.15 | 86  | 9.18   | 186 | 28.86   |   |
| 1035 | Rnf167         | 3.14 | 67  | 8.18   | 143 | 25.71   |   |
| 1036 | Satb1          | 3.14 | 94  | 4.01   | 193 | 12.61   |   |
| 1037 | Wnt11          | 3.14 | 83  | 6.08   | 176 | 19.07   |   |
| 1038 | Amigo1         | 3.13 | 26  | 1.4    | 56  | 4.37    |   |
| 1039 | Abhd4          | 3.13 | 293 | 30.26  | 631 | 94.61   |   |
| 1040 | Cxxc5_1        | 3.13 | 125 | 19.89  | 287 | 62.16   |   |
| 1041 | Bzw2           | 3.13 | 440 | 42.32  | 972 | 132.25  |   |
| 1042 | Ccdc134        | 3.12 | 28  | 3.23   | 55  | 10.08   |   |
| 1043 | Tmem8a         | 3.12 | 24  | 1.11   | 48  | 3.48    |   |
| 1044 | Extl2          | 3.12 | 47  | 3.69   | 77  | 11.5    |   |
| 1045 | Gaa            | 3.11 | 235 | 15.63  | 480 | 48.68   |   |
| 1046 | Appl2          | 3.11 | 96  | 5.3    | 195 | 16.49   |   |
| 1047 | Ddb2           | 3.11 | 22  | 0.95   | 35  | 2.95    |   |
| 1048 | Lins           | 3.11 | 30  | 1.75   | 48  | 5.45    |   |
| 1049 | LOC102552796   | 3.11 | 7   | 0.72   | 15  | 2.25    |   |
| 1050 | Tlhc1          | 3.11 | 24  | 1.28   | 38  | 4       |   |
| 1051 | Tor3a          | 3.11 | 6   | 0.96   | 13  | 3       |   |
| 1052 | Pomgnt2        | 3.1  | 30  | 3.52   | 64  | 10.91   |   |
| 1053 | Vwa1           | 3.1  | 17  | 1.31   | 35  | 4.07    |   |
| 1054 | Rfxank         | 3.1  | 37  | 4.21   | 42  | 13.05   |   |
| 1055 | Gstm1          | 3.09 | 48  | 10.49  | 107 | 32.44   |   |
| 1056 | Sema4a         | 3.09 | 13  | 0.59   | 22  | 1.82    |   |
| 1057 | Slc8b1         | 3.09 | 11  | 0.75   | 29  | 2.31    |   |
| 1058 | LOC100910577   | 3.09 | 6   | 1.15   | 12  | 3.54    |   |
| 1059 | Rnf150         | 3.09 | 35  | 1.41   | 72  | 4.34    |   |
| 1060 | Snph           | 3.09 | 27  | 0.42   | 29  | 1.31    |   |
| 1061 | Xkr5           | 3.09 | 20  | 0.91   | 27  | 2.82    |   |
| 1062 | Zbtb3          | 3.09 | 8   | 0.98   | 17  | 3.04    |   |
| 1063 | Zfp677         | 3.09 | 9   | 1.05   | 21  | 3.23    |   |
| 1064 | RGD1565059     | 3.09 | 9   | 1.29   | 22  | 3.98    |   |
| 1065 | Timm17b        | 3.08 | 0   | 12     | 0   | 36.97   |   |
| 1066 | Pde1a          | 3.08 | 43  | 4.37   | 109 | 13.45   |   |
| 1067 | Tmem8b         | 3.08 | 40  | 2.99   | 58  | 9.19    |   |
| 1068 | Bbs9           | 3.07 | 45  | 2.5    | 81  | 7.68    |   |
| 1069 | Foxred2        | 3.07 | 27  | 1.4    | 57  | 4.3     |   |
| 1070 | Mpst           | 3.07 | 57  | 11.06  | 120 | 33.92   |   |
| 1071 | Ston2          | 3.07 | 44  | 2.11   | 76  | 6.48    |   |
| 1072 | AABR07009638.1 | 3.07 | 0   | 3.72   | 3   | 11.41   |   |
| 1073 | Rpl39_2        | 3.07 | 0   | 6.92   | 0   | 21.23   |   |
| 1074 | SNORD75_2      | 3.07 | 18  | 72.34  | 37  | 221.91  |   |
| 1075 | Tspyl4         | 3.07 | 9   | 1.13   | 19  | 3.46    |   |
| 1076 | Crispld2       | 3.07 | 351 | 19.56  | 738 | 59.98   |   |

Supplemental Table 2  
Vehicle versus FSH, 24 hours

|      | A              | B    | C   | D     | E    | F      | G |
|------|----------------|------|-----|-------|------|--------|---|
| 1077 | LOC100360449   | 3.07 | 0   | 27.54 | 0    | 84.42  |   |
| 1078 | Giot1          | 3.06 | 19  | 2.41  | 34   | 7.38   |   |
| 1079 | Tet1           | 3.06 | 29  | 0.78  | 65   | 2.37   |   |
| 1080 | Taf9           | 3.05 | 1   | 1.39  | 1    | 4.25   |   |
| 1081 | Fam217b        | 3.05 | 10  | 0.54  | 22   | 1.65   |   |
| 1082 | Naprt1         | 3.05 | 11  | 1.24  | 25   | 3.79   |   |
| 1083 | Cep44          | 3.04 | 62  | 6.7   | 147  | 20.4   |   |
| 1084 | Pnp            | 3.04 | 315 | 64.65 | 637  | 196.48 |   |
| 1085 | Oxsm           | 3.04 | 13  | 0.88  | 28   | 2.68   |   |
| 1086 | Tmem243        | 3.04 | 31  | 2.5   | 66   | 7.6    |   |
| 1087 | Mettl15        | 3.04 | 31  | 0.52  | 52   | 1.58   |   |
| 1088 | Pla2g6         | 3.04 | 63  | 3.14  | 127  | 9.54   |   |
| 1089 | Hecw1          | 3.03 | 87  | 1     | 135  | 3.03   |   |
| 1090 | Pcdh10         | 3.03 | 91  | 6.21  | 177  | 18.82  |   |
| 1091 | Irak3          | 3.03 | 19  | 0.94  | 41   | 2.86   |   |
| 1092 | LOC680039      | 3.03 | 6   | 0.45  | 18   | 1.35   |   |
| 1093 | Pts            | 3.03 | 17  | 2.48  | 34   | 7.51   |   |
| 1094 | C1s            | 3.02 | 262 | 25.44 | 567  | 76.81  |   |
| 1095 | Mx2            | 3.02 | 12  | 1.11  | 26   | 3.34   |   |
| 1096 | Rmnd5b_1       | 3.02 | 0   | 5.24  | 0    | 15.82  |   |
| 1097 | Endod1         | 3.02 | 53  | 9.22  | 109  | 27.79  |   |
| 1098 | Stat5a         | 3.01 | 29  | 1.93  | 54   | 5.81   |   |
| 1099 | Aste1          | 3.01 | 31  | 0.97  | 48   | 2.92   |   |
| 1100 | Pde4b          | 3.01 | 24  | 1.06  | 37   | 3.19   |   |
| 1101 | Slc44a1        | 3.01 | 285 | 9.87  | 600  | 29.7   |   |
| 1102 | Slc2a13        | 3    | 33  | 0.6   | 50   | 1.8    |   |
| 1103 | Nprl3          | 3    | 104 | 5.64  | 204  | 16.93  |   |
| 1104 | Xdh            | 3    | 54  | 2.46  | 108  | 7.38   |   |
| 1105 | Mark1          | 3    | 620 | 23.94 | 1319 | 71.73  |   |
| 1106 | LOC102553763   | 2.99 | 53  | 6.05  | 104  | 18.09  |   |
| 1107 | 2310067B10Rik  | 2.99 | 118 | 5.85  | 220  | 17.5   |   |
| 1108 | Dyrk1b         | 2.99 | 60  | 5.91  | 141  | 17.67  |   |
| 1109 | Nrep           | 2.99 | 27  | 10.31 | 53   | 30.8   |   |
| 1110 | Galnt7         | 2.98 | 202 | 7.97  | 414  | 23.8   |   |
| 1111 | Gde1           | 2.98 | 88  | 13.67 | 176  | 40.78  |   |
| 1112 | Nagpa          | 2.98 | 23  | 2.22  | 41   | 6.61   |   |
| 1113 | Reep2          | 2.98 | 20  | 2.49  | 41   | 7.43   |   |
| 1114 | Mfsd3          | 2.98 | 8   | 2.17  | 14   | 6.48   |   |
| 1115 | Fam89b         | 2.98 | 121 | 24.08 | 239  | 71.81  |   |
| 1116 | Epha7          | 2.98 | 34  | 1.75  | 70   | 5.19   |   |
| 1117 | Pdxk           | 2.97 | 21  | 4.32  | 45   | 12.84  |   |
| 1118 | Zdhhc1         | 2.97 | 14  | 3.52  | 37   | 10.47  |   |
| 1119 | Znrf2          | 2.97 | 158 | 5.05  | 297  | 14.99  |   |
| 1120 | Pcgf6          | 2.97 | 48  | 2.86  | 75   | 8.49   |   |
| 1121 | Ift46          | 2.96 | 55  | 3.78  | 79   | 11.21  |   |
| 1122 | Slc41a1        | 2.96 | 152 | 7.45  | 295  | 22.04  |   |
| 1123 | Mif4gd         | 2.95 | 39  | 5.99  | 76   | 17.7   |   |
| 1124 | Tspo           | 2.95 | 68  | 18.71 | 135  | 55.24  |   |
| 1125 | AABR07002624.1 | 2.95 | 0   | 24.95 | 0    | 73.57  |   |
| 1126 | Nudt10         | 2.95 | 46  | 7.64  | 102  | 22.52  |   |
| 1127 | Manba          | 2.94 | 70  | 2.64  | 89   | 7.77   |   |
| 1128 | Rgma           | 2.94 | 52  | 3.22  | 107  | 9.47   |   |
| 1129 | Qpctl          | 2.94 | 59  | 5.18  | 112  | 15.21  |   |
| 1130 | Fntb           | 2.94 | 78  | 4.82  | 132  | 14.14  |   |

Supplemental Table 2  
Vehicle versus FSH, 24 hours

|      | A              | B    | C    | D     | E    | F      | G |
|------|----------------|------|------|-------|------|--------|---|
| 1131 | Tmem50b        | 2.92 | 110  | 8.8   | 193  | 25.75  |   |
| 1132 | Phka1          | 2.92 | 313  | 10.25 | 594  | 29.97  |   |
| 1133 | Gsta4          | 2.92 | 115  | 25.41 | 216  | 74.21  |   |
| 1134 | Ivns1abp       | 2.91 | 1597 | 88.32 | 3281 | 256.87 |   |
| 1135 | Cd274          | 2.91 | 5    | 0.13  | 3    | 0.37   |   |
| 1136 | 5_8S_rRNA_2    | 2.91 | 0    | 405.5 | 0    | 1178.5 |   |
| 1137 | AABR07000747.1 | 2.91 | 1    | 0.79  | 0    | 2.3    |   |
| 1138 | AABR07001519.1 | 2.91 | 25   | 0.25  | 22   | 0.71   |   |
| 1139 | AABR07003001.2 | 2.91 | 1815 | 0.39  | 804  | 1.12   |   |
| 1140 | AABR07004112.1 | 2.91 | 0    | 0.1   | 0    | 0.29   |   |
| 1141 | AABR07004799.1 | 2.91 | 0    | 0.38  | 1    | 1.11   |   |
| 1142 | AABR07005533.1 | 2.91 | 0    | 0.19  | 1    | 0.55   |   |
| 1143 | AABR07006866.1 | 2.91 | 2    | 0.6   | 4    | 1.74   |   |
| 1144 | AABR07007130.1 | 2.91 | 4    | 0.45  | 7    | 1.31   |   |
| 1145 | AABR07028036.1 | 2.91 | 2    | 0.22  | 3    | 0.64   |   |
| 1146 | AABR07054490.1 | 2.91 | 4    | 0.18  | 19   | 0.53   |   |
| 1147 | AABR07072711.1 | 2.91 | 1    | 0.14  | 2    | 0.41   |   |
| 1148 | AC110351.1     | 2.91 | 0    | 0.62  | 0    | 1.81   |   |
| 1149 | AC129370.1     | 2.91 | 4    | 0.5   | 13   | 1.46   |   |
| 1150 | AC133265.1     | 2.91 | 5    | 1.87  | 5    | 5.42   |   |
| 1151 | Acad11         | 2.91 | 82   | 3.59  | 136  | 10.43  |   |
| 1152 | ACEA_U3_6      | 2.91 | 0    | 1.16  | 0    | 3.37   |   |
| 1153 | Ampd1          | 2.91 | 6    | 0.1   | 4    | 0.3    |   |
| 1154 | Arrb1          | 2.91 | 55   | 0.73  | 68   | 2.13   |   |
| 1155 | Asic4          | 2.91 | 11   | 0.28  | 9    | 0.83   |   |
| 1156 | Atp6ap1l       | 2.91 | 6    | 0.44  | 5    | 1.28   |   |
| 1157 | B3galt4        | 2.91 | 3    | 0.47  | 6    | 1.38   |   |
| 1158 | Begain         | 2.91 | 2    | 0.09  | 2    | 0.26   |   |
| 1159 | Brinp1         | 2.91 | 5    | 0.08  | 8    | 0.22   |   |
| 1160 | Cacna1a        | 2.91 | 8    | 0.03  | 9    | 0.08   |   |
| 1161 | Capn6          | 2.91 | 1    | 0.07  | 2    | 0.21   |   |
| 1162 | Cbx7           | 2.91 | 8    | 0.47  | 19   | 1.36   |   |
| 1163 | Ccdc158        | 2.91 | 5    | 0.07  | 6    | 0.2    |   |
| 1164 | Cenpa          | 2.91 | 3    | 0.3   | 5    | 0.86   |   |
| 1165 | Cfap46_2       | 2.91 | 2    | 0.15  | 4    | 0.44   |   |
| 1166 | Cldn23         | 2.91 | 1    | 0.14  | 2    | 0.42   |   |
| 1167 | Clec11a        | 2.91 | 2    | 0.16  | 4    | 0.48   |   |
| 1168 | Clmn           | 2.91 | 7    | 0.05  | 10   | 0.15   |   |
| 1169 | Cntln          | 2.91 | 30   | 0.99  | 44   | 2.89   |   |
| 1170 | Cntn2          | 2.91 | 3    | 0.05  | 4    | 0.14   |   |
| 1171 | Cntnap5b       | 2.91 | 286  | 0.06  | 349  | 0.18   |   |
| 1172 | Colec10        | 2.91 | 6    | 0.05  | 2    | 0.16   |   |
| 1173 | Coro2b         | 2.91 | 19   | 0.75  | 17   | 2.17   |   |
| 1174 | Crisp3         | 2.91 | 2    | 0.17  | 4    | 0.51   |   |
| 1175 | Ctrl           | 2.91 | 1    | 0.31  | 2    | 0.91   |   |
| 1176 | Dcun1d2        | 2.91 | 0    | 0.09  | 0    | 0.27   |   |
| 1177 | Dennd2d        | 2.91 | 3    | 0.13  | 2    | 0.38   |   |
| 1178 | Fhad1          | 2.91 | 5    | 0.05  | 4    | 0.13   |   |
| 1179 | Ftl1l1         | 2.91 | 0    | 1.35  | 1    | 3.94   |   |
| 1180 | Gdnf           | 2.91 | 10   | 0.71  | 9    | 2.07   |   |
| 1181 | Gramd4         | 2.91 | 14   | 0.49  | 21   | 1.41   |   |
| 1182 | Hcn3           | 2.91 | 3    | 0.16  | 7    | 0.45   |   |
| 1183 | Hecw2          | 2.91 | 9    | 0.09  | 15   | 0.27   |   |
| 1184 | Hist1h3f       | 2.91 | 0    | 0.61  | 0    | 1.76   |   |

Supplemental Table 2  
Vehicle versus FSH, 24 hours

|      | A              | B    | C  | D    | E  | F     | G |
|------|----------------|------|----|------|----|-------|---|
| 1185 | Hoxd8          | 2.91 | 3  | 0.6  | 4  | 1.74  |   |
| 1186 | Il15           | 2.91 | 20 | 1.02 | 12 | 2.96  |   |
| 1187 | lqch           | 2.91 | 37 | 0.06 | 31 | 0.18  |   |
| 1188 | Kcne3          | 2.91 | 24 | 0.43 | 11 | 1.25  |   |
| 1189 | Kcnk7          | 2.91 | 1  | 0.16 | 1  | 0.46  |   |
| 1190 | Lias           | 2.91 | 24 | 2.83 | 47 | 8.22  |   |
| 1191 | LOC100360411   | 2.91 | 1  | 0.16 | 3  | 0.45  |   |
| 1192 | LOC100361811   | 2.91 | 1  | 1.8  | 4  | 5.23  |   |
| 1193 | LOC100365450   | 2.91 | 1  | 0.32 | 2  | 0.92  |   |
| 1194 | LOC100911109   | 2.91 | 0  | 0.17 | 0  | 0.5   |   |
| 1195 | LOC100911225   | 2.91 | 0  | 0.21 | 0  | 0.61  |   |
| 1196 | LOC103692471   | 2.91 | 0  | 0.17 | 0  | 0.49  |   |
| 1197 | LOC103693683   | 2.91 | 8  | 0.15 | 5  | 0.42  |   |
| 1198 | LOC687780      | 2.91 | 0  | 0.62 | 0  | 1.8   |   |
| 1199 | LOC690806      | 2.91 | 7  | 1.87 | 9  | 5.42  |   |
| 1200 | LOC691909      | 2.91 | 1  | 0.17 | 1  | 0.49  |   |
| 1201 | Lrp1b_2        | 2.91 | 2  | 0.22 | 4  | 0.64  |   |
| 1202 | Mdga1          | 2.91 | 6  | 0.07 | 4  | 0.21  |   |
| 1203 | Mgarp          | 2.91 | 4  | 0.62 | 7  | 1.8   |   |
| 1204 | Mia            | 2.91 | 1  | 0.44 | 2  | 1.27  |   |
| 1205 | Mmrn2          | 2.91 | 6  | 0.06 | 4  | 0.18  |   |
| 1206 | Mok            | 2.91 | 20 | 0.46 | 26 | 1.33  |   |
| 1207 | Mrgpre         | 2.91 | 1  | 0.27 | 2  | 0.78  |   |
| 1208 | Mroh8          | 2.91 | 7  | 0.07 | 8  | 0.22  |   |
| 1209 | Nanos3         | 2.91 | 2  | 0.34 | 8  | 0.98  |   |
| 1210 | Nat2           | 2.91 | 3  | 0.36 | 8  | 1.05  |   |
| 1211 | Negr1          | 2.91 | 22 | 0.14 | 28 | 0.42  |   |
| 1212 | Nmi            | 2.91 | 20 | 4.6  | 35 | 13.37 |   |
| 1213 | Notum          | 2.91 | 2  | 0.24 | 4  | 0.71  |   |
| 1214 | Npy1r          | 2.91 | 1  | 0.09 | 2  | 0.25  |   |
| 1215 | Nqo2           | 2.91 | 4  | 0.36 | 4  | 1.06  |   |
| 1216 | Nyap1          | 2.91 | 0  | 0.22 | 0  | 0.64  |   |
| 1217 | Olr1505_1      | 2.91 | 1  | 0.54 | 3  | 1.56  |   |
| 1218 | P2ry2          | 2.91 | 1  | 0.14 | 2  | 0.42  |   |
| 1219 | Plekhg4        | 2.91 | 2  | 0.06 | 2  | 0.19  |   |
| 1220 | Pnma1          | 2.91 | 1  | 0.14 | 2  | 0.41  |   |
| 1221 | Pot1b          | 2.91 | 17 | 1.43 | 41 | 4.15  |   |
| 1222 | Prob1          | 2.91 | 1  | 0.08 | 2  | 0.24  |   |
| 1223 | Ptpn7          | 2.91 | 2  | 0.06 | 3  | 0.16  |   |
| 1224 | Rasa4          | 2.91 | 17 | 0.89 | 30 | 2.58  |   |
| 1225 | Rfx2           | 2.91 | 7  | 0.15 | 8  | 0.44  |   |
| 1226 | Rfx4           | 2.91 | 24 | 0.12 | 18 | 0.34  |   |
| 1227 | RGD1306227     | 2.91 | 20 | 1.52 | 38 | 4.41  |   |
| 1228 | RGD1310049     | 2.91 | 11 | 0.42 | 20 | 1.22  |   |
| 1229 | RGD1359634     | 2.91 | 2  | 0.77 | 4  | 2.22  |   |
| 1230 | RGD1560010     | 2.91 | 7  | 0.9  | 14 | 2.62  |   |
| 1231 | RGD1564719     | 2.91 | 7  | 0.82 | 14 | 2.39  |   |
| 1232 | Rimbp3         | 2.91 | 2  | 0.09 | 4  | 0.27  |   |
| 1233 | Rltpr          | 2.91 | 11 | 0.21 | 14 | 0.62  |   |
| 1234 | Rn60_12_0174.1 | 2.91 | 1  | 0.25 | 1  | 0.72  |   |
| 1235 | Rn60_19_0291.1 | 2.91 | 2  | 0.31 | 3  | 0.89  |   |
| 1236 | Rn60_19_0706.2 | 2.91 | 3  | 1.77 | 4  | 5.16  |   |
| 1237 | Rn60_4_1360.2  | 2.91 | 0  | 0.18 | 0  | 0.52  |   |
| 1238 | Rpl10l         | 2.91 | 3  | 1.16 | 6  | 3.38  |   |

Supplemental Table 2  
Vehicle versus FSH, 24 hours

|      | A              | B    | C  | D     | E   | F     | G |
|------|----------------|------|----|-------|-----|-------|---|
| 1239 | Sema4f         | 2.91 | 2  | 0.13  | 5   | 0.36  |   |
| 1240 | Sepw1          | 2.91 | 0  | 1.87  | 0   | 5.42  |   |
| 1241 | Slc27a3        | 2.91 | 36 | 3.73  | 77  | 10.83 |   |
| 1242 | Slc30a2        | 2.91 | 2  | 0.08  | 2   | 0.23  |   |
| 1243 | Slc43a3        | 2.91 | 4  | 0.18  | 4   | 0.53  |   |
| 1244 | Slitrk3        | 2.91 | 1  | 0.08  | 2   | 0.22  |   |
| 1245 | SNORA17_124    | 2.91 | 0  | 1.89  | 0   | 5.49  |   |
| 1246 | SNORA44_21     | 2.91 | 0  | 1.93  | 0   | 5.61  |   |
| 1247 | SNORA44_25     | 2.91 | 0  | 1.93  | 0   | 5.61  |   |
| 1248 | SNORD12_1      | 2.91 | 0  | 2.71  | 0   | 7.87  |   |
| 1249 | SNORD36_3      | 2.91 | 0  | 10.53 | 0   | 30.6  |   |
| 1250 | SNORD49_1      | 2.91 | 1  | 3.51  | 2   | 10.2  |   |
| 1251 | SNORD53_SNORD9 | 2.91 | 0  | 2.8   | 0   | 8.14  |   |
| 1252 | Spdya          | 2.91 | 3  | 0.11  | 8   | 0.32  |   |
| 1253 | Synpo2l        | 2.91 | 3  | 0.08  | 3   | 0.25  |   |
| 1254 | Tle6           | 2.91 | 2  | 0.25  | 4   | 0.72  |   |
| 1255 | Trpm8          | 2.91 | 4  | 0.18  | 9   | 0.52  |   |
| 1256 | Tspan7         | 2.91 | 56 | 7.75  | 108 | 22.54 |   |
| 1257 | U3_6           | 2.91 | 0  | 1.16  | 0   | 3.37  |   |
| 1258 | Unc93b1        | 2.91 | 16 | 2.89  | 31  | 8.41  |   |
| 1259 | Usp2           | 2.91 | 9  | 0.29  | 7   | 0.85  |   |
| 1260 | Wdr24          | 2.91 | 66 | 5.37  | 118 | 15.6  |   |
| 1261 | Wdr90          | 2.91 | 64 | 2.33  | 125 | 6.76  |   |
| 1262 | Wscd1          | 2.91 | 6  | 0.17  | 4   | 0.51  |   |
| 1263 | Xkr6           | 2.91 | 80 | 0.27  | 55  | 0.78  |   |
| 1264 | Xpnpep2        | 2.91 | 2  | 0.07  | 3   | 0.21  |   |
| 1265 | Zdhhc23        | 2.91 | 6  | 0.24  | 7   | 0.7   |   |
| 1266 | Zfp37          | 2.91 | 0  | 0.14  | 1   | 0.41  |   |
| 1267 | Zp1            | 2.91 | 1  | 0.13  | 2   | 0.37  |   |
| 1268 | 1500009L16Rik  | 2.91 | 2  | 0.49  | 5   | 1.42  |   |
| 1269 | 1810024B03Rik  | 2.91 | 1  | 0.12  | 2   | 0.35  |   |
| 1270 | AABR07001929.1 | 2.91 | 9  | 0.3   | 9   | 0.87  |   |
| 1271 | AABR07019306.1 | 2.91 | 1  | 0.19  | 1   | 0.56  |   |
| 1272 | AABR07022022.1 | 2.91 | 1  | 0.26  | 1   | 0.75  |   |
| 1273 | AABR07030890.1 | 2.91 | 1  | 0.22  | 2   | 0.64  |   |
| 1274 | AABR07030914.1 | 2.91 | 6  | 0.41  | 4   | 1.19  |   |
| 1275 | AABR07042915.1 | 2.91 | 0  | 0.6   | 0   | 1.74  |   |
| 1276 | AABR07043288.1 | 2.91 | 1  | 1     | 1   | 2.91  |   |
| 1277 | AABR07043725.1 | 2.91 | 0  | 0.2   | 0   | 0.58  |   |
| 1278 | AABR07049064.1 | 2.91 | 6  | 0.53  | 7   | 1.53  |   |
| 1279 | AABR07051190.1 | 2.91 | 1  | 0.19  | 2   | 0.54  |   |
| 1280 | AABR07053509.1 | 2.91 | 0  | 0.76  | 0   | 2.19  |   |
| 1281 | AABR07058831.1 | 2.91 | 1  | 0.48  | 1   | 1.4   |   |
| 1282 | AABR07062799.2 | 2.91 | 7  | 1.99  | 13  | 5.79  |   |
| 1283 | Abcb9          | 2.91 | 5  | 0.05  | 5   | 0.13  |   |
| 1284 | Abcc6          | 2.91 | 4  | 0.04  | 6   | 0.13  |   |
| 1285 | AC099449.1     | 2.91 | 14 | 0.49  | 27  | 1.44  |   |
| 1286 | AC130741.1     | 2.91 | 1  | 0.41  | 2   | 1.2   |   |
| 1287 | AC130866.2     | 2.91 | 0  | 0.19  | 0   | 0.56  |   |
| 1288 | AC133739.1     | 2.91 | 2  | 0.05  | 2   | 0.15  |   |
| 1289 | AC135443.1     | 2.91 | 0  | 3.11  | 0   | 9.05  |   |
| 1290 | Acp5           | 2.91 | 6  | 0.97  | 16  | 2.8   |   |
| 1291 | Actl7a         | 2.91 | 1  | 0.16  | 2   | 0.46  |   |
| 1292 | Ankmy1         | 2.91 | 3  | 0.08  | 8   | 0.24  |   |



Supplemental Table 2  
Vehicle versus FSH, 24 hours

|      | A            | B    | C   | D    | E   | F     | G |
|------|--------------|------|-----|------|-----|-------|---|
| 1293 | Ankrd23      | 2.91 | 1   | 0.19 | 2   | 0.55  |   |
| 1294 | Apeg3        | 2.91 | 0   | 0.27 | 0   | 0.78  |   |
| 1295 | Bbs2         | 2.91 | 48  | 3.29 | 94  | 9.57  |   |
| 1296 | Bcl2l11      | 2.91 | 42  | 1.16 | 59  | 3.38  |   |
| 1297 | Bend5        | 2.91 | 18  | 1.36 | 32  | 3.95  |   |
| 1298 | Cdk20        | 2.91 | 31  | 2.59 | 57  | 7.53  |   |
| 1299 | Clic3        | 2.91 | 1   | 0.08 | 2   | 0.23  |   |
| 1300 | Col6a2       | 2.91 | 4   | 0.27 | 9   | 0.78  |   |
| 1301 | Col8a2       | 2.91 | 3   | 0.06 | 2   | 0.17  |   |
| 1302 | Cracr2a      | 2.91 | 2   | 0.27 | 2   | 0.78  |   |
| 1303 | Csad         | 2.91 | 44  | 4.49 | 85  | 13.05 |   |
| 1304 | Cspg5        | 2.91 | 23  | 2.32 | 36  | 6.75  |   |
| 1305 | Cthrc1       | 2.91 | 1   | 0.2  | 2   | 0.6   |   |
| 1306 | Dnah17       | 2.91 | 17  | 0.02 | 8   | 0.05  |   |
| 1307 | Dnah2        | 2.91 | 10  | 0.02 | 5   | 0.05  |   |
| 1308 | Dqx1         | 2.91 | 5   | 0.29 | 6   | 0.83  |   |
| 1309 | Ece2         | 2.91 | 4   | 0.13 | 7   | 0.39  |   |
| 1310 | Ect2l        | 2.91 | 14  | 0.1  | 27  | 0.28  |   |
| 1311 | Egfl8        | 2.91 | 1   | 0.18 | 1   | 0.53  |   |
| 1312 | Entpd7_1     | 2.91 | 0   | 0.24 | 0   | 0.71  |   |
| 1313 | Epm2a        | 2.91 | 6   | 0.22 | 8   | 0.63  |   |
| 1314 | Fam212b      | 2.91 | 3   | 0.22 | 7   | 0.64  |   |
| 1315 | Fat2         | 2.91 | 2   | 0.02 | 3   | 0.06  |   |
| 1316 | Fbxo27       | 2.91 | 6   | 0.35 | 9   | 1.03  |   |
| 1317 | Fermt3       | 2.91 | 3   | 0.61 | 5   | 1.77  |   |
| 1318 | Gm1045       | 2.91 | 3   | 0.65 | 2   | 1.9   |   |
| 1319 | Gpr19        | 2.91 | 11  | 0.98 | 22  | 2.86  |   |
| 1320 | Grhl3        | 2.91 | 2   | 0.1  | 5   | 0.29  |   |
| 1321 | Hist1h2bb    | 2.91 | 1   | 1.31 | 3   | 3.8   |   |
| 1322 | Hist1h4b_2   | 2.91 | 0   | 0.8  | 0   | 2.32  |   |
| 1323 | Hoxc8        | 2.91 | 1   | 0.12 | 2   | 0.34  |   |
| 1324 | Hoxd3        | 2.91 | 1   | 0.1  | 2   | 0.29  |   |
| 1325 | Hsd3b1       | 2.91 | 0   | 0.15 | 1   | 0.42  |   |
| 1326 | Ier5l        | 2.91 | 3   | 0.48 | 6   | 1.38  |   |
| 1327 | Igf2         | 2.91 | 7   | 0.27 | 13  | 0.77  |   |
| 1328 | Igflr1       | 2.91 | 1   | 0.2  | 2   | 0.59  |   |
| 1329 | Ikbke        | 2.91 | 8   | 0.08 | 8   | 0.22  |   |
| 1330 | Kihl41       | 2.91 | 1   | 0.11 | 3   | 0.32  |   |
| 1331 | Ldhd         | 2.91 | 108 | 1.39 | 145 | 4.05  |   |
| 1332 | Lgals5       | 2.91 | 1   | 0.55 | 2   | 1.6   |   |
| 1333 | Lhx8         | 2.91 | 1   | 0.14 | 2   | 0.41  |   |
| 1334 | LOC100361060 | 2.91 | 0   | 1.55 | 0   | 4.51  |   |
| 1335 | LOC100362384 | 2.91 | 1   | 2.24 | 2   | 6.52  |   |
| 1336 | LOC100362965 | 2.91 | 0   | 1.15 | 0   | 3.35  |   |
| 1337 | LOC100910965 | 2.91 | 0   | 0.46 | 0   | 1.35  |   |
| 1338 | LOC100911286 | 2.91 | 0   | 0.53 | 0   | 1.54  |   |
| 1339 | LOC100911337 | 2.91 | 0   | 0.66 | 0   | 1.92  |   |
| 1340 | LOC100911926 | 2.91 | 1   | 0.1  | 2   | 0.29  |   |
| 1341 | LOC100912436 | 2.91 | 0   | 0.66 | 0   | 1.91  |   |
| 1342 | LOC680161    | 2.91 | 0   | 0.62 | 0   | 1.81  |   |
| 1343 | LOC685963    | 2.91 | 0   | 1.17 | 0   | 3.4   |   |
| 1344 | Lonrf3       | 2.91 | 9   | 0.16 | 7   | 0.47  |   |
| 1345 | Morn2        | 2.91 | 3   | 0.76 | 5   | 2.2   |   |
| 1346 | Naaladl1     | 2.91 | 7   | 0.2  | 6   | 0.57  |   |

Supplemental Table 2  
Vehicle versus FSH, 24 hours

|      | A              | B    | C   | D     | E   | F     | G |
|------|----------------|------|-----|-------|-----|-------|---|
| 1347 | Nefh           | 2.91 | 2   | 0.13  | 4   | 0.38  |   |
| 1348 | Nlrc5          | 2.91 | 6   | 0.13  | 7   | 0.38  |   |
| 1349 | Nmb            | 2.91 | 2   | 0.17  | 2   | 0.51  |   |
| 1350 | Nmu            | 2.91 | 2   | 0.35  | 3   | 1.02  |   |
| 1351 | Nptxr          | 2.91 | 8   | 0.31  | 14  | 0.9   |   |
| 1352 | Oas1d          | 2.91 | 0   | 0.23  | 0   | 0.66  |   |
| 1353 | Ovol1          | 2.91 | 1   | 0.05  | 2   | 0.13  |   |
| 1354 | Pcp4l1         | 2.91 | 24  | 0.97  | 20  | 2.83  |   |
| 1355 | Pdgfrl         | 2.91 | 4   | 0.17  | 7   | 0.49  |   |
| 1356 | Phf11c         | 2.91 | 1   | 0.25  | 3   | 0.72  |   |
| 1357 | Piwil1         | 2.91 | 1   | 0.06  | 2   | 0.18  |   |
| 1358 | Pkd2l2         | 2.91 | 9   | 0.2   | 13  | 0.59  |   |
| 1359 | Prom1          | 2.91 | 4   | 0.05  | 7   | 0.15  |   |
| 1360 | Pygm           | 2.91 | 6   | 0.09  | 7   | 0.25  |   |
| 1361 | Rab19          | 2.91 | 2   | 0.12  | 3   | 0.34  |   |
| 1362 | Rag1           | 2.91 | 1   | 0.04  | 2   | 0.11  |   |
| 1363 | Ret            | 2.91 | 3   | 0.04  | 3   | 0.13  |   |
| 1364 | RGD1311447     | 2.91 | 11  | 0.27  | 5   | 0.77  |   |
| 1365 | RGD1563220     | 2.91 | 0   | 0.31  | 0   | 0.9   |   |
| 1366 | RGD1624210     | 2.91 | 2   | 0.16  | 6   | 0.47  |   |
| 1367 | Rgs22          | 2.91 | 13  | 0.05  | 7   | 0.14  |   |
| 1368 | Rhbdl1         | 2.91 | 3   | 0.33  | 4   | 0.96  |   |
| 1369 | Rn60_14_0449.2 | 2.91 | 0   | 0.83  | 0   | 2.41  |   |
| 1370 | Rn60_20_0292.1 | 2.91 | 0   | 0.61  | 0   | 1.77  |   |
| 1371 | Rn60_X_0634.2  | 2.91 | 2   | 0.38  | 3   | 1.1   |   |
| 1372 | Rnf39          | 2.91 | 1   | 0.11  | 2   | 0.31  |   |
| 1373 | Rps17l         | 2.91 | 0   | 1.83  | 2   | 5.32  |   |
| 1374 | Scgb1c1        | 2.91 | 1   | 0.54  | 2   | 1.58  |   |
| 1375 | Sh3gl2         | 2.91 | 5   | 0.17  | 6   | 0.49  |   |
| 1376 | Slc1a7         | 2.91 | 4   | 0.09  | 9   | 0.26  |   |
| 1377 | Slc25a34       | 2.91 | 4   | 0.19  | 5   | 0.55  |   |
| 1378 | Slc27a2        | 2.91 | 1   | 0.08  | 7   | 0.24  |   |
| 1379 | Slc43a2        | 2.91 | 25  | 0.78  | 37  | 2.26  |   |
| 1380 | Slitrk5        | 2.91 | 1   | 0.05  | 2   | 0.15  |   |
| 1381 | SNORD12_2      | 2.91 | 0   | 8.4   | 0   | 24.41 |   |
| 1382 | SNORD36_4      | 2.91 | 0   | 14.44 | 0   | 41.98 |   |
| 1383 | Spag8          | 2.91 | 3   | 0.42  | 8   | 1.21  |   |
| 1384 | St6galnac2     | 2.91 | 9   | 0.12  | 3   | 0.36  |   |
| 1385 | Syng3          | 2.91 | 2   | 0.2   | 4   | 0.59  |   |
| 1386 | Tesb           | 2.91 | 3   | 0.08  | 2   | 0.24  |   |
| 1387 | Tfdp2          | 2.91 | 34  | 1.27  | 65  | 3.69  |   |
| 1388 | Tirap          | 2.91 | 8   | 1.99  | 18  | 5.77  |   |
| 1389 | Tmc8           | 2.91 | 2   | 0.09  | 3   | 0.27  |   |
| 1390 | Tmem178a       | 2.91 | 7   | 0.75  | 14  | 2.17  |   |
| 1391 | Tmie           | 2.91 | 2   | 0.1   | 2   | 0.28  |   |
| 1392 | Vwa3a          | 2.91 | 14  | 0.12  | 13  | 0.35  |   |
| 1393 | Wipf3          | 2.91 | 57  | 1.89  | 89  | 5.51  |   |
| 1394 | Zfp473         | 2.91 | 3   | 0.16  | 4   | 0.45  |   |
| 1395 | Zfp951_2       | 2.91 | 0   | 0.2   | 0   | 0.59  |   |
| 1396 | Commd5         | 2.91 | 0   | 0.74  | 0   | 2.15  |   |
| 1397 | Tulp3          | 2.9  | 193 | 28.75 | 363 | 83.3  |   |
| 1398 | Pdcd4          | 2.88 | 150 | 12.98 | 275 | 37.43 |   |
| 1399 | Agtrap         | 2.88 | 58  | 4.25  | 116 | 12.24 |   |
| 1400 | Naga           | 2.88 | 110 | 11.89 | 207 | 34.21 |   |

Supplemental Table 2  
Vehicle versus FSH, 24 hours

|      | A              | B    | C    | D      | E    | F       | G |
|------|----------------|------|------|--------|------|---------|---|
| 1401 | Dhcr7          | 2.87 | 397  | 33.26  | 782  | 95.49   |   |
| 1402 | Abcb1a         | 2.87 | 2122 | 25.07  | 3957 | 71.97   |   |
| 1403 | Peg3           | 2.87 | 103  | 3.31   | 192  | 9.49    |   |
| 1404 | Sept9          | 2.87 | 240  | 16.11  | 582  | 46.19   |   |
| 1405 | Rtn2           | 2.86 | 79   | 8.88   | 165  | 25.45   |   |
| 1406 | Metazoa_SRP_26 | 2.86 | 0    | 25     | 0    | 71.45   |   |
| 1407 | Ugt1a8         | 2.86 | 43   | 0.8    | 77   | 2.29    |   |
| 1408 | Pink1          | 2.86 | 66   | 5.89   | 116  | 16.83   |   |
| 1409 | Gm2a           | 2.85 | 311  | 37.42  | 613  | 106.81  |   |
| 1410 | Gas6           | 2.85 | 1251 | 85     | 2371 | 242.47  |   |
| 1411 | Pdk2           | 2.85 | 26   | 4.89   | 49   | 13.9    |   |
| 1412 | Cog5           | 2.84 | 122  | 7.69   | 224  | 21.87   |   |
| 1413 | Ldoc1l         | 2.84 | 23   | 7.83   | 45   | 22.26   |   |
| 1414 | Hsd17b11       | 2.84 | 79   | 10.32  | 154  | 29.3    |   |
| 1415 | Pcdhac1        | 2.84 | 152  | 1.14   | 280  | 3.24    |   |
| 1416 | Cacna1h        | 2.83 | 145  | 3.77   | 249  | 10.67   |   |
| 1417 | Arhgap44       | 2.83 | 46   | 1.83   | 72   | 5.18    |   |
| 1418 | Frmf5          | 2.83 | 139  | 9.27   | 290  | 26.21   |   |
| 1419 | LOC100911238   | 2.83 | 0    | 15.65  | 1    | 44.26   |   |
| 1420 | Pik3ip1        | 2.82 | 98   | 7.7    | 187  | 21.74   |   |
| 1421 | Dennd2c        | 2.82 | 28   | 0.79   | 47   | 2.24    |   |
| 1422 | Zfp12          | 2.82 | 17   | 1.93   | 33   | 5.43    |   |
| 1423 | Blvrb          | 2.82 | 61   | 7.01   | 91   | 19.74   |   |
| 1424 | Slc25a43       | 2.8  | 26   | 1.6    | 53   | 4.49    |   |
| 1425 | Tmem180        | 2.8  | 21   | 1.58   | 40   | 4.43    |   |
| 1426 | Fndc3b         | 2.8  | 1352 | 65.19  | 2634 | 182.59  |   |
| 1427 | 03/02/15       | 2.8  | 248  | 32.32  | 440  | 90.52   |   |
| 1428 | Wdr19          | 2.8  | 36   | 1.56   | 65   | 4.36    |   |
| 1429 | Lrrm1          | 2.79 | 13   | 1.06   | 25   | 2.97    |   |
| 1430 | Ldlrad3        | 2.78 | 86   | 2.98   | 136  | 8.27    |   |
| 1431 | Cttna1         | 2.78 | 180  | 7.66   | 295  | 21.26   |   |
| 1432 | Ifi27          | 2.78 | 260  | 76.19  | 485  | 211.43  |   |
| 1433 | AABR07054405.1 | 2.77 | 143  | 9.46   | 271  | 26.26   |   |
| 1434 | Tor4a          | 2.77 | 11   | 0.91   | 22   | 2.53    |   |
| 1435 | Gpr137         | 2.77 | 14   | 1.66   | 26   | 4.6     |   |
| 1436 | Rangrf         | 2.77 | 16   | 3.27   | 38   | 9.08    |   |
| 1437 | Tmem261        | 2.77 | 24   | 6.29   | 42   | 17.44   |   |
| 1438 | Chst11         | 2.77 | 381  | 19.86  | 651  | 54.93   |   |
| 1439 | Isoc1          | 2.76 | 104  | 22.85  | 179  | 63.18   |   |
| 1440 | LOC103692171   | 2.76 | 0    | 6.55   | 1    | 18.1    |   |
| 1441 | Gins3          | 2.76 | 12   | 1.04   | 20   | 2.88    |   |
| 1442 | Cnr1           | 2.76 | 11   | 0.46   | 23   | 1.26    |   |
| 1443 | Gstk1          | 2.76 | 22   | 5.21   | 41   | 14.39   |   |
| 1444 | Srd5a1         | 2.76 | 25   | 1.83   | 49   | 5.06    |   |
| 1445 | 5_8S_rRNA_16   | 2.76 | 0    | 449.48 | 0    | 1240.03 |   |
| 1446 | Ntpcr          | 2.75 | 23   | 4.65   | 45   | 12.79   |   |
| 1447 | AABR07056556.2 | 2.75 | 0    | 37.35  | 0    | 102.81  |   |
| 1448 | Sarm1          | 2.75 | 27   | 1.73   | 57   | 4.75    |   |
| 1449 | Eml1           | 2.74 | 37   | 1.87   | 55   | 5.14    |   |
| 1450 | Adamts17       | 2.74 | 19   | 0.67   | 41   | 1.83    |   |
| 1451 | Clec2d2        | 2.74 | 51   | 3.37   | 78   | 9.22    |   |
| 1452 | Chsy1          | 2.74 | 359  | 22.33  | 684  | 61.15   |   |
| 1453 | Sptssa         | 2.74 | 94   | 13.3   | 155  | 36.4    |   |
| 1454 | Lrrn2          | 2.74 | 27   | 1.29   | 42   | 3.53    |   |

Supplemental Table 2  
Vehicle versus FSH, 24 hours

|      | A              | B    | C    | D      | E    | F      | G |
|------|----------------|------|------|--------|------|--------|---|
| 1455 | Tmem42         | 2.74 | 22   | 2.32   | 35   | 6.34   |   |
| 1456 | Lrp11          | 2.73 | 83   | 4.5    | 132  | 12.29  |   |
| 1457 | Tlr3           | 2.73 | 61   | 3.18   | 117  | 8.67   |   |
| 1458 | LOC690617      | 2.72 | 37   | 3.1    | 86   | 8.46   |   |
| 1459 | Acvr2b         | 2.72 | 18   | 1.11   | 25   | 3.03   |   |
| 1460 | Asrgl1         | 2.72 | 21   | 1.22   | 27   | 3.32   |   |
| 1461 | Ccnjl          | 2.72 | 43   | 1.37   | 103  | 3.73   |   |
| 1462 | Mest           | 2.72 | 13   | 2      | 18   | 5.44   |   |
| 1463 | Qpct           | 2.72 | 8    | 1.31   | 16   | 3.56   |   |
| 1464 | Rft1           | 2.72 | 45   | 3.71   | 69   | 10.1   |   |
| 1465 | SNORD12_3      | 2.72 | 0    | 21.9   | 0    | 59.68  |   |
| 1466 | Syce1l         | 2.72 | 19   | 1.94   | 24   | 5.29   |   |
| 1467 | Tshz3          | 2.72 | 16   | 0.4    | 21   | 1.08   |   |
| 1468 | Eda2r          | 2.72 | 19   | 1.05   | 25   | 2.86   |   |
| 1469 | LOC102723236_2 | 2.72 | 0    | 32.39  | 0    | 88.1   |   |
| 1470 | Tctn1          | 2.72 | 58   | 3.31   | 96   | 9      |   |
| 1471 | Ltbp1          | 2.72 | 380  | 11.97  | 683  | 32.53  |   |
| 1472 | Ptk2b          | 2.71 | 26   | 0.95   | 38   | 2.58   |   |
| 1473 | Pttg1          | 2.71 | 15   | 3.58   | 29   | 9.71   |   |
| 1474 | Snx29          | 2.71 | 140  | 3.41   | 229  | 9.24   |   |
| 1475 | Stk24          | 2.7  | 211  | 34.21  | 371  | 92.53  |   |
| 1476 | lft122         | 2.7  | 88   | 2.84   | 122  | 7.67   |   |
| 1477 | Id3            | 2.7  | 312  | 83.47  | 565  | 225.3  |   |
| 1478 | AC117925.2     | 2.7  | 0    | 1.94   | 0    | 5.23   |   |
| 1479 | Rcor2          | 2.7  | 0    | 0.7    | 0    | 1.88   |   |
| 1480 | Rpusd1         | 2.7  | 15   | 1.87   | 30   | 5.04   |   |
| 1481 | AABR07066529.1 | 2.7  | 21   | 2.54   | 38   | 6.84   |   |
| 1482 | Acot3          | 2.7  | 10   | 1.35   | 29   | 3.65   |   |
| 1483 | Ddx25          | 2.7  | 15   | 2.1    | 30   | 5.67   |   |
| 1484 | Enkd1          | 2.7  | 6    | 1.14   | 11   | 3.07   |   |
| 1485 | Pald1          | 2.7  | 56   | 2.85   | 101  | 7.7    |   |
| 1486 | Armt1          | 2.69 | 28   | 2.05   | 48   | 5.5    |   |
| 1487 | Klhl17         | 2.69 | 27   | 2.43   | 48   | 6.53   |   |
| 1488 | Smox           | 2.69 | 24   | 1.91   | 50   | 5.15   |   |
| 1489 | Oaf            | 2.69 | 53   | 6.77   | 104  | 18.18  |   |
| 1490 | Dock9          | 2.68 | 125  | 2.18   | 238  | 5.86   |   |
| 1491 | RGD1563072_2   | 2.68 | 11   | 2.59   | 14   | 6.95   |   |
| 1492 | Tsc22d1        | 2.68 | 1987 | 80.48  | 3084 | 215.55 |   |
| 1493 | Agpat2         | 2.68 | 46   | 8.55   | 75   | 22.9   |   |
| 1494 | Trmu           | 2.68 | 30   | 2.89   | 55   | 7.74   |   |
| 1495 | RGD1561113     | 2.68 | 34   | 43.51  | 57   | 116.38 |   |
| 1496 | Fam214a        | 2.67 | 279  | 9.06   | 484  | 24.23  |   |
| 1497 | Nbl1           | 2.67 | 160  | 19.99  | 274  | 53.45  |   |
| 1498 | Tceal1         | 2.67 | 31   | 6.58   | 55   | 17.59  |   |
| 1499 | AABR07015057.1 | 2.67 | 551  | 328.34 | 1059 | 876.66 |   |
| 1500 | Pomk           | 2.67 | 208  | 15.17  | 381  | 40.51  |   |
| 1501 | Mcoln1         | 2.67 | 106  | 8.79   | 162  | 23.44  |   |
| 1502 | Abcg1          | 2.66 | 14   | 0.77   | 25   | 2.05   |   |
| 1503 | Efhc1          | 2.66 | 8    | 0.67   | 20   | 1.8    |   |
| 1504 | LOC100912455   | 2.66 | 0    | 0.49   | 0    | 1.31   |   |
| 1505 | Mepce          | 2.66 | 0    | 0.75   | 0    | 2.01   |   |
| 1506 | Mertk          | 2.66 | 14   | 0.32   | 19   | 0.86   |   |
| 1507 | Nubpl          | 2.66 | 35   | 0.79   | 37   | 2.11   |   |
| 1508 | Rad51c         | 2.66 | 14   | 0.64   | 19   | 1.69   |   |

Supplemental Table 2  
Vehicle versus FSH, 24 hours

|      | A            | B    | C    | D     | E    | F      | G |
|------|--------------|------|------|-------|------|--------|---|
| 1509 | Scg3         | 2.66 | 16   | 1.39  | 25   | 3.72   |   |
| 1510 | Tmem140      | 2.66 | 13   | 1.09  | 22   | 2.91   |   |
| 1511 | Tmem167b     | 2.66 | 5    | 2.32  | 8    | 6.18   |   |
| 1512 | Ube2ql1      | 2.66 | 12   | 0.56  | 15   | 1.5    |   |
| 1513 | Vsig10l      | 2.66 | 15   | 1.29  | 23   | 3.45   |   |
| 1514 | Rpp25        | 2.66 | 24   | 4.33  | 44   | 11.54  |   |
| 1515 | Parp9        | 2.66 | 173  | 9.88  | 290  | 26.31  |   |
| 1516 | LOC100362830 | 2.66 | 21   | 44.54 | 40   | 118.27 |   |
| 1517 | Fut4         | 2.65 | 46   | 2.89  | 84   | 7.68   |   |
| 1518 | Dbp          | 2.65 | 22   | 2.49  | 41   | 6.59   |   |
| 1519 | Zfp167       | 2.65 | 41   | 0.88  | 55   | 2.32   |   |
| 1520 | Alad         | 2.65 | 82   | 9.66  | 142  | 25.59  |   |
| 1521 | Gatsl2       | 2.64 | 24   | 2.21  | 31   | 5.84   |   |
| 1522 | Nkiras1      | 2.64 | 12   | 1.22  | 21   | 3.21   |   |
| 1523 | Pcdhga7      | 2.64 | 22   | 2.26  | 40   | 5.96   |   |
| 1524 | Tbcel        | 2.64 | 127  | 4.63  | 173  | 12.24  |   |
| 1525 | Bcat1        | 2.64 | 358  | 24.11 | 573  | 63.62  |   |
| 1526 | Slc22a5      | 2.64 | 217  | 1.09  | 215  | 2.87   |   |
| 1527 | Htra3        | 2.64 | 153  | 12.05 | 228  | 31.76  |   |
| 1528 | Fam171b      | 2.63 | 136  | 11.67 | 237  | 30.72  |   |
| 1529 | Akr1cl       | 2.63 | 37   | 3.94  | 47   | 10.37  |   |
| 1530 | Igtp         | 2.63 | 39   | 1.23  | 68   | 3.23   |   |
| 1531 | LOC100911186 | 2.63 | 0    | 3.53  | 0    | 9.28   |   |
| 1532 | Gsto2_1      | 2.63 | 8    | 3.01  | 14   | 7.9    |   |
| 1533 | Mgmt         | 2.63 | 59   | 6.34  | 80   | 16.68  |   |
| 1534 | Lnx2         | 2.63 | 69   | 2.6   | 133  | 6.85   |   |
| 1535 | Atl1         | 2.62 | 11   | 0.47  | 17   | 1.22   |   |
| 1536 | Ccdc84       | 2.62 | 23   | 1.25  | 29   | 3.26   |   |
| 1537 | Gcat         | 2.62 | 10   | 1.59  | 18   | 4.15   |   |
| 1538 | Gpt          | 2.62 | 12   | 1.43  | 21   | 3.75   |   |
| 1539 | Hba1         | 2.62 | 11   | 8.96  | 25   | 23.44  |   |
| 1540 | Il16         | 2.62 | 13   | 0.25  | 10   | 0.65   |   |
| 1541 | Lrrc24       | 2.62 | 8    | 0.62  | 14   | 1.62   |   |
| 1542 | Nipal3       | 2.62 | 12   | 1.14  | 22   | 2.98   |   |
| 1543 | Nrxn3_2      | 2.62 | 4    | 0.96  | 5    | 2.52   |   |
| 1544 | SNORD36_7    | 2.62 | 0    | 18.06 | 0    | 47.23  |   |
| 1545 | Zfand4       | 2.62 | 38   | 0.94  | 38   | 2.45   |   |
| 1546 | Fkbpl        | 2.62 | 1    | 0.96  | 3    | 2.52   |   |
| 1547 | Fuz          | 2.62 | 12   | 1.51  | 35   | 3.96   |   |
| 1548 | Nek2         | 2.62 | 5    | 0.94  | 5    | 2.45   |   |
| 1549 | Pcdhb12      | 2.62 | 5    | 0.41  | 7    | 1.08   |   |
| 1550 | Pus7l        | 2.62 | 19   | 0.9   | 26   | 2.35   |   |
| 1551 | Slc28a2      | 2.62 | 22   | 0.3   | 17   | 0.78   |   |
| 1552 | Tubgcp5      | 2.61 | 85   | 3.64  | 155  | 9.49   |   |
| 1553 | Per3         | 2.61 | 65   | 1.94  | 109  | 5.07   |   |
| 1554 | Mks1         | 2.61 | 36   | 2.93  | 57   | 7.64   |   |
| 1555 | AC117925.5   | 2.6  | 1    | 1.91  | 2    | 4.97   |   |
| 1556 | Pigh         | 2.6  | 26   | 2     | 45   | 5.19   |   |
| 1557 | Sgsm2        | 2.6  | 250  | 8.53  | 408  | 22.19  |   |
| 1558 | Rpgrip1l     | 2.59 | 49   | 0.99  | 77   | 2.56   |   |
| 1559 | Chst12       | 2.59 | 14   | 2.16  | 25   | 5.61   |   |
| 1560 | Aplf         | 2.59 | 2432 | 5.8   | 1429 | 15.03  |   |
| 1561 | Mgat4b       | 2.59 | 473  | 45.88 | 825  | 118.83 |   |
| 1562 | Gatb         | 2.59 | 51   | 4.22  | 77   | 10.93  |   |

Supplemental Table 2  
Vehicle versus FSH, 24 hours

|      | A              | B    | C    | D     | E    | F      | G |
|------|----------------|------|------|-------|------|--------|---|
| 1563 | Apbb2          | 2.58 | 9    | 3.54  | 18   | 9.15   |   |
| 1564 | LOC100912538   | 2.58 | 0    | 2.23  | 0    | 5.76   |   |
| 1565 | Lsm10          | 2.58 | 20   | 4.95  | 40   | 12.79  |   |
| 1566 | Clstn2         | 2.58 | 41   | 0.82  | 49   | 2.12   |   |
| 1567 | Pon3           | 2.58 | 8    | 1.55  | 13   | 3.99   |   |
| 1568 | Socs7          | 2.58 | 50   | 5.17  | 102  | 13.36  |   |
| 1569 | Sema3b         | 2.58 | 127  | 12.4  | 226  | 32.01  |   |
| 1570 | Zfp799         | 2.58 | 31   | 3.55  | 56   | 9.16   |   |
| 1571 | Bdh1           | 2.58 | 96   | 5.84  | 152  | 15.05  |   |
| 1572 | Nqo1           | 2.58 | 22   | 3.47  | 40   | 8.94   |   |
| 1573 | Tmem184c       | 2.58 | 367  | 33.91 | 651  | 87.36  |   |
| 1574 | Ncoa4          | 2.57 | 437  | 29.9  | 755  | 76.96  |   |
| 1575 | AABR07035107.1 | 2.57 | 21   | 4.64  | 43   | 11.94  |   |
| 1576 | Harbi1         | 2.57 | 16   | 1.34  | 27   | 3.44   |   |
| 1577 | Nbeal2         | 2.57 | 32   | 0.75  | 50   | 1.92   |   |
| 1578 | Pdf            | 2.57 | 18   | 4.65  | 28   | 11.96  |   |
| 1579 | Ubash3b        | 2.57 | 121  | 3.7   | 249  | 9.52   |   |
| 1580 | Unc79          | 2.57 | 29   | 0.43  | 37   | 1.1    |   |
| 1581 | Abcd1          | 2.57 | 33   | 1.64  | 65   | 4.21   |   |
| 1582 | Trim25         | 2.57 | 170  | 14.03 | 300  | 36.01  |   |
| 1583 | Irf1           | 2.56 | 91   | 10.35 | 152  | 26.53  |   |
| 1584 | AABR07007000.1 | 2.56 | 21   | 11.25 | 39   | 28.81  |   |
| 1585 | Zfp157         | 2.56 | 38   | 1.62  | 55   | 4.15   |   |
| 1586 | Cry1           | 2.56 | 110  | 9.21  | 187  | 23.54  |   |
| 1587 | Mylip          | 2.55 | 136  | 7.39  | 226  | 18.88  |   |
| 1588 | Sema5a         | 2.55 | 2578 | 54.36 | 4382 | 138.85 |   |
| 1589 | Zmiz1          | 2.55 | 688  | 17.79 | 1158 | 45.4   |   |
| 1590 | Cpz            | 2.55 | 50   | 5.63  | 86   | 14.37  |   |
| 1591 | P3h4           | 2.55 | 121  | 15.86 | 212  | 40.43  |   |
| 1592 | Podxl2         | 2.55 | 81   | 8.29  | 141  | 21.11  |   |
| 1593 | Ogn_1          | 2.55 | 550  | 99.85 | 911  | 254.4  |   |
| 1594 | LOC100360491   | 2.55 | 27   | 57.74 | 77   | 146.96 |   |
| 1595 | Fkbp7          | 2.54 | 54   | 3.47  | 87   | 8.82   |   |
| 1596 | Mtg1           | 2.54 | 45   | 5.93  | 74   | 15.07  |   |
| 1597 | Nhlrc1         | 2.54 | 4    | 0.84  | 7    | 2.13   |   |
| 1598 | SNORD24_3      | 2.54 | 16   | 48.62 | 28   | 123.63 |   |
| 1599 | AABR07044711.1 | 2.54 | 0    | 0.68  | 1    | 1.73   |   |
| 1600 | B3galt6        | 2.54 | 16   | 1.87  | 28   | 4.74   |   |
| 1601 | B3gnt1         | 2.54 | 0    | 0.8   | 0    | 2.03   |   |
| 1602 | Bloc1s3        | 2.54 | 4    | 1.7   | 7    | 4.31   |   |
| 1603 | Btbd8_2        | 2.54 | 8    | 1.76  | 10   | 4.47   |   |
| 1604 | Cdk18          | 2.54 | 9    | 0.27  | 11   | 0.7    |   |
| 1605 | Cyp2j4         | 2.54 | 7    | 0.52  | 7    | 1.31   |   |
| 1606 | Ikzf4          | 2.54 | 5    | 0.57  | 10   | 1.44   |   |
| 1607 | Laptm5         | 2.54 | 6    | 0.42  | 9    | 1.08   |   |
| 1608 | LOC100912391   | 2.54 | 42   | 3.32  | 71   | 8.44   |   |
| 1609 | Lzts1          | 2.54 | 9    | 0.2   | 8    | 0.51   |   |
| 1610 | Pemt           | 2.54 | 16   | 2.24  | 29   | 5.7    |   |
| 1611 | Pex10          | 2.54 | 23   | 2.93  | 36   | 7.46   |   |
| 1612 | Pik3r5         | 2.54 | 6    | 0.21  | 9    | 0.54   |   |
| 1613 | Rn60_X_0744.1  | 2.54 | 8    | 7.44  | 12   | 18.91  |   |
| 1614 | Sema3f         | 2.54 | 8    | 0.16  | 7    | 0.42   |   |
| 1615 | Tmem223        | 2.54 | 63   | 19.99 | 105  | 50.83  |   |
| 1616 | LOC497963      | 2.54 | 13   | 0.3   | 18   | 0.76   |   |

Supplemental Table 2  
Vehicle versus FSH, 24 hours

|      | A              | B    | C   | D     | E   | F      | G |
|------|----------------|------|-----|-------|-----|--------|---|
| 1617 | Fam13c         | 2.53 | 118 | 8.72  | 276 | 22.08  |   |
| 1618 | Oxa1l          | 2.53 | 217 | 20.6  | 369 | 52.17  |   |
| 1619 | Klhl26         | 2.53 | 36  | 1.76  | 60  | 4.45   |   |
| 1620 | Ddt            | 2.53 | 100 | 39.34 | 176 | 99.45  |   |
| 1621 | Il11ra1        | 2.52 | 44  | 5.53  | 71  | 13.95  |   |
| 1622 | Pidd1          | 2.52 | 3   | 1.43  | 8   | 3.6    |   |
| 1623 | Klhl11         | 2.52 | 144 | 13.97 | 245 | 35.18  |   |
| 1624 | Sh3d19         | 2.52 | 41  | 3.15  | 57  | 7.94   |   |
| 1625 | Rab3a          | 2.52 | 11  | 2.72  | 18  | 6.84   |   |
| 1626 | Il13ra1        | 2.52 | 4   | 7.97  | 14  | 20.07  |   |
| 1627 | Gnb5           | 2.51 | 19  | 2.6   | 31  | 6.51   |   |
| 1628 | AABR07036746.1 | 2.51 | 0   | 4.52  | 0   | 11.35  |   |
| 1629 | LOC100910872   | 2.51 | 7   | 1.93  | 8   | 4.83   |   |
| 1630 | Zfp952         | 2.51 | 19  | 1.98  | 32  | 4.97   |   |
| 1631 | Crtc1          | 2.51 | 98  | 6.71  | 161 | 16.83  |   |
| 1632 | Smco4          | 2.51 | 37  | 8.02  | 53  | 20.09  |   |
| 1633 | Fam20b         | 2.5  | 50  | 3.75  | 55  | 9.39   |   |
| 1634 | Nfix           | 2.5  | 83  | 5.13  | 81  | 12.85  |   |
| 1635 | Pced1b         | 2.5  | 55  | 2.25  | 102 | 5.62   |   |
| 1636 | Cpt1a          | 2.5  | 222 | 11.57 | 398 | 28.95  |   |
| 1637 | Slc25a1        | 2.49 | 311 | 43.59 | 520 | 108.73 |   |
| 1638 | Ctsf           | 2.49 | 42  | 5.62  | 73  | 13.99  |   |
| 1639 | AABR07062512.1 | 2.49 | 12  | 1.17  | 17  | 2.92   |   |
| 1640 | Alkbh6_1       | 2.49 | 0   | 3.75  | 0   | 9.33   |   |
| 1641 | Card14         | 2.49 | 71  | 0.58  | 85  | 1.45   |   |
| 1642 | Dhx34          | 2.49 | 41  | 2.24  | 65  | 5.58   |   |
| 1643 | Glrx           | 2.49 | 10  | 1.36  | 13  | 3.39   |   |
| 1644 | Hoga1          | 2.49 | 12  | 0.98  | 21  | 2.45   |   |
| 1645 | Miip           | 2.49 | 10  | 4.84  | 21  | 12.07  |   |
| 1646 | Tspan4         | 2.49 | 0   | 2.47  | 0   | 6.16   |   |
| 1647 | Wdr78          | 2.49 | 41  | 0.47  | 31  | 1.17   |   |
| 1648 | Kcnq5          | 2.49 | 51  | 0.27  | 67  | 0.67   |   |
| 1649 | LOC100125367   | 2.49 | 6   | 0.89  | 10  | 2.21   |   |
| 1650 | Tspy26         | 2.49 | 7   | 0.84  | 12  | 2.1    |   |
| 1651 | C1qtnf1        | 2.49 | 44  | 3.03  | 80  | 7.53   |   |
| 1652 | LOC100911130   | 2.48 | 0   | 14.88 | 0   | 36.97  |   |
| 1653 | Tysnd1         | 2.48 | 28  | 1.83  | 36  | 4.54   |   |
| 1654 | Nipal2         | 2.48 | 37  | 1.93  | 41  | 4.77   |   |
| 1655 | Cdip1          | 2.48 | 256 | 11.11 | 309 | 27.52  |   |
| 1656 | Btd            | 2.47 | 153 | 14.1  | 230 | 34.88  |   |
| 1657 | Jade2          | 2.47 | 116 | 7.37  | 212 | 18.22  |   |
| 1658 | Rnasek         | 2.47 | 13  | 19.92 | 28  | 49.26  |   |
| 1659 | Psmb8          | 2.47 | 4   | 1.21  | 9   | 2.98   |   |
| 1660 | Sgsh           | 2.47 | 30  | 8.12  | 52  | 20.05  |   |
| 1661 | Il27ra         | 2.47 | 15  | 0.52  | 21  | 1.28   |   |
| 1662 | Olfml3         | 2.47 | 94  | 13.18 | 159 | 32.54  |   |
| 1663 | Rad51d         | 2.46 | 34  | 2.25  | 54  | 5.54   |   |
| 1664 | Tmem259        | 2.46 | 90  | 11.7  | 141 | 28.81  |   |
| 1665 | AY172581.15    | 2.46 | 13  | 46.94 | 22  | 115.44 |   |
| 1666 | Dedd2          | 2.46 | 19  | 1.46  | 28  | 3.58   |   |
| 1667 | Zfp606         | 2.46 | 19  | 1.32  | 35  | 3.25   |   |
| 1668 | Akr7a2         | 2.46 | 52  | 7.17  | 77  | 17.62  |   |
| 1669 | Gstm7          | 2.45 | 179 | 13.63 | 266 | 33.44  |   |
| 1670 | Mcph1          | 2.45 | 70  | 2.43  | 100 | 5.96   |   |

Supplemental Table 2  
Vehicle versus FSH, 24 hours

|      | A              | B    | C   | D     | E    | F     | G |
|------|----------------|------|-----|-------|------|-------|---|
| 1671 | Tp53i3         | 2.45 | 25  | 2.51  | 29   | 6.15  |   |
| 1672 | Abhd13         | 2.45 | 134 | 5.39  | 205  | 13.2  |   |
| 1673 | Ap1s3          | 2.45 | 43  | 1.87  | 69   | 4.57  |   |
| 1674 | Lmf1           | 2.45 | 112 | 6.58  | 156  | 16.11 |   |
| 1675 | Palm           | 2.45 | 894 | 9.42  | 119  | 23.05 |   |
| 1676 | Zhx3           | 2.45 | 91  | 5.46  | 145  | 13.37 |   |
| 1677 | Prpsap1        | 2.45 | 192 | 17.64 | 291  | 43.15 |   |
| 1678 | Anpep          | 2.45 | 234 | 14.49 | 386  | 35.45 |   |
| 1679 | Zfp869         | 2.44 | 28  | 3.91  | 50   | 9.55  |   |
| 1680 | AC117925.8     | 2.44 | 0   | 4.87  | 0    | 11.88 |   |
| 1681 | Usp21          | 2.44 | 116 | 10.45 | 170  | 25.48 |   |
| 1682 | Fam53b         | 2.43 | 68  | 1.79  | 115  | 4.36  |   |
| 1683 | Pcnxl4         | 2.43 | 66  | 3.05  | 107  | 7.41  |   |
| 1684 | Slc23a2        | 2.43 | 863 | 25.36 | 1335 | 61.7  |   |
| 1685 | AABR07037943.1 | 2.42 | 4   | 0.3   | 9    | 0.73  |   |
| 1686 | AC091229.1     | 2.42 | 15  | 0.79  | 23   | 1.92  |   |
| 1687 | Acrbp          | 2.42 | 5   | 0.59  | 8    | 1.44  |   |
| 1688 | Car11          | 2.42 | 6   | 0.56  | 13   | 1.36  |   |
| 1689 | Ccbl2          | 2.42 | 6   | 0.55  | 10   | 1.33  |   |
| 1690 | Ccdc171        | 2.42 | 18  | 0.17  | 18   | 0.41  |   |
| 1691 | Coq10a         | 2.42 | 47  | 3.91  | 67   | 9.48  |   |
| 1692 | Cpxm1          | 2.42 | 13  | 1.26  | 20   | 3.06  |   |
| 1693 | Dact3          | 2.42 | 4   | 0.27  | 5    | 0.65  |   |
| 1694 | Ero1lb         | 2.42 | 7   | 0.46  | 11   | 1.12  |   |
| 1695 | Fancb          | 2.42 | 7   | 0.48  | 15   | 1.16  |   |
| 1696 | Irak1bp1       | 2.42 | 20  | 1.21  | 22   | 2.94  |   |
| 1697 | Lrrc29         | 2.42 | 14  | 0.32  | 20   | 0.79  |   |
| 1698 | Mlxipl         | 2.42 | 5   | 0.23  | 7    | 0.55  |   |
| 1699 | Mmp15          | 2.42 | 3   | 0.19  | 6    | 0.45  |   |
| 1700 | Naa11          | 2.42 | 3   | 0.23  | 5    | 0.56  |   |
| 1701 | Parp14         | 2.42 | 145 | 4.58  | 236  | 11.08 |   |
| 1702 | RGD1307947     | 2.42 | 8   | 0.94  | 13   | 2.27  |   |
| 1703 | RGD1561777_1   | 2.42 | 15  | 1.1   | 22   | 2.66  |   |
| 1704 | RT1-M3-1       | 2.42 | 25  | 3.54  | 42   | 8.57  |   |
| 1705 | Slain1         | 2.42 | 46  | 5     | 68   | 12.11 |   |
| 1706 | Slc15a3        | 2.42 | 4   | 0.33  | 6    | 0.8   |   |
| 1707 | Stard10        | 2.42 | 12  | 1.5   | 16   | 3.64  |   |
| 1708 | Tnfaip8l2      | 2.42 | 11  | 0.54  | 9    | 1.31  |   |
| 1709 | Wnk4           | 2.42 | 0   | 0.18  | 1    | 0.43  |   |
| 1710 | AABR07005779.2 | 2.42 | 4   | 1.48  | 6    | 3.58  |   |
| 1711 | AABR07061178.1 | 2.42 | 9   | 1.94  | 13   | 4.7   |   |
| 1712 | Atp5s          | 2.42 | 20  | 0.75  | 14   | 1.82  |   |
| 1713 | Atp6v1c2       | 2.42 | 10  | 0.52  | 22   | 1.27  |   |
| 1714 | Car6           | 2.42 | 5   | 0.54  | 7    | 1.32  |   |
| 1715 | Cd302          | 2.42 | 7   | 0.62  | 10   | 1.5   |   |
| 1716 | Cited1         | 2.42 | 9   | 1.35  | 18   | 3.26  |   |
| 1717 | Dusp19         | 2.42 | 11  | 2.28  | 16   | 5.52  |   |
| 1718 | Eppin          | 2.42 | 14  | 0.54  | 29   | 1.31  |   |
| 1719 | Ggh            | 2.42 | 6   | 1.1   | 10   | 2.68  |   |
| 1720 | Kazald1        | 2.42 | 3   | 0.46  | 7    | 1.12  |   |
| 1721 | Kcns3          | 2.42 | 5   | 0.32  | 11   | 0.78  |   |
| 1722 | LOC102549158   | 2.42 | 0   | 0.47  | 1    | 1.13  |   |
| 1723 | LOC257642      | 2.42 | 7   | 9.84  | 12   | 23.82 |   |
| 1724 | Mpp2           | 2.42 | 22  | 1.56  | 36   | 3.77  |   |



Supplemental Table 2  
Vehicle versus FSH, 24 hours

|      | A              | B    | C   | D     | E   | F     | G |
|------|----------------|------|-----|-------|-----|-------|---|
| 1725 | Phf1           | 2.42 | 55  | 4.45  | 76  | 10.78 |   |
| 1726 | Prkag2         | 2.42 | 150 | 4.27  | 182 | 10.35 |   |
| 1727 | Ptges2         | 2.42 | 46  | 4.84  | 72  | 11.72 |   |
| 1728 | Rn60_X_0714.1  | 2.42 | 11  | 0.66  | 22  | 1.6   |   |
| 1729 | Slc14a2_2      | 2.42 | 5   | 0.83  | 6   | 2.01  |   |
| 1730 | Sod2           | 2.42 | 105 | 12.32 | 172 | 29.84 |   |
| 1731 | Tkfc           | 2.42 | 40  | 3.47  | 57  | 8.41  |   |
| 1732 | Vom2r44        | 2.42 | 7   | 0.11  | 10  | 0.26  |   |
| 1733 | Wnt6           | 2.42 | 13  | 1.09  | 23  | 2.64  |   |
| 1734 | Wwox           | 2.42 | 3   | 1.74  | 6   | 4.22  |   |
| 1735 | Optn           | 2.42 | 173 | 6.48  | 282 | 15.67 |   |
| 1736 | Cyb5a          | 2.41 | 72  | 21.59 | 111 | 52.14 |   |
| 1737 | Gpc1           | 2.41 | 222 | 15.76 | 368 | 38.04 |   |
| 1738 | RT1-CE10       | 2.41 | 52  | 7.43  | 72  | 17.92 |   |
| 1739 | Saal1          | 2.41 | 50  | 1.66  | 74  | 4.01  |   |
| 1740 | Sirt3          | 2.41 | 79  | 6.85  | 101 | 16.49 |   |
| 1741 | Dzip3          | 2.41 | 68  | 1.96  | 82  | 4.72  |   |
| 1742 | Arsb           | 2.41 | 170 | 8.86  | 270 | 21.33 |   |
| 1743 | Hacd3          | 2.4  | 217 | 18.92 | 352 | 45.46 |   |
| 1744 | Ttc8           | 2.4  | 71  | 4.86  | 102 | 11.68 |   |
| 1745 | Ammecr1        | 2.4  | 47  | 5.7   | 70  | 13.69 |   |
| 1746 | Mast4_2        | 2.4  | 106 | 14.84 | 163 | 35.62 |   |
| 1747 | Ednra          | 2.4  | 80  | 3.09  | 134 | 7.42  |   |
| 1748 | Nudt14         | 2.4  | 23  | 6     | 44  | 14.38 |   |
| 1749 | Tctex1d2_1     | 2.4  | 20  | 5.64  | 32  | 13.53 |   |
| 1750 | Sgcb           | 2.4  | 122 | 7.65  | 209 | 18.35 |   |
| 1751 | Tref1          | 2.4  | 161 | 6.78  | 270 | 16.24 |   |
| 1752 | Cpt1c          | 2.4  | 56  | 3.38  | 78  | 8.09  |   |
| 1753 | Fkbp10         | 2.4  | 415 | 33.86 | 683 | 81.09 |   |
| 1754 | Pex19_1        | 2.39 | 41  | 9.23  | 45  | 22.11 |   |
| 1755 | Car14          | 2.39 | 32  | 3.39  | 40  | 8.11  |   |
| 1756 | Gdf11          | 2.39 | 34  | 2.11  | 57  | 5.05  |   |
| 1757 | Ccnf           | 2.39 | 79  | 4.89  | 119 | 11.69 |   |
| 1758 | Plxna3         | 2.39 | 91  | 2.94  | 148 | 7.02  |   |
| 1759 | AABR07036019.1 | 2.39 | 17  | 1.04  | 27  | 2.47  |   |
| 1760 | Zfp287         | 2.39 | 16  | 1.52  | 25  | 3.64  |   |
| 1761 | Slc37a4        | 2.39 | 54  | 4.88  | 87  | 11.66 |   |
| 1762 | Zcchc11        | 2.39 | 567 | 21.65 | 825 | 51.65 |   |
| 1763 | RGD1311744     | 2.39 | 62  | 3.68  | 96  | 8.77  |   |
| 1764 | Sgsm3          | 2.38 | 31  | 2.2   | 48  | 5.23  |   |
| 1765 | AABR07058985.2 | 2.38 | 21  | 2.04  | 35  | 4.85  |   |
| 1766 | Reep4          | 2.38 | 65  | 7.97  | 108 | 18.99 |   |
| 1767 | Cnm3           | 2.38 | 101 | 5.04  | 154 | 11.99 |   |
| 1768 | Lemd2          | 2.38 | 14  | 6.16  | 21  | 14.67 |   |
| 1769 | Abhd14a        | 2.38 | 15  | 1.68  | 28  | 4     |   |
| 1770 | Cbr4           | 2.38 | 14  | 2.34  | 23  | 5.58  |   |
| 1771 | Chek2          | 2.38 | 25  | 1.34  | 37  | 3.18  |   |
| 1772 | Mbd4           | 2.38 | 20  | 1.61  | 26  | 3.83  |   |
| 1773 | Mecr           | 2.38 | 25  | 2.11  | 33  | 5.01  |   |
| 1774 | Stra13         | 2.38 | 12  | 13.64 | 19  | 32.42 |   |
| 1775 | Tmem126b       | 2.38 | 43  | 4.49  | 71  | 10.67 |   |
| 1776 | Uvssa          | 2.38 | 12  | 1.04  | 16  | 2.48  |   |
| 1777 | Zfp964         | 2.38 | 11  | 1.78  | 18  | 4.23  |   |
| 1778 | AABR07069599.1 | 2.38 | 11  | 5.5   | 23  | 13.09 |   |

Supplemental Table 2  
Vehicle versus FSH, 24 hours

|      | A              | B    | C    | D      | E    | F      | G |
|------|----------------|------|------|--------|------|--------|---|
| 1779 | Thra           | 2.37 | 157  | 9.12   | 210  | 21.65  |   |
| 1780 | Evl            | 2.37 | 206  | 15.79  | 316  | 37.47  |   |
| 1781 | Fut11          | 2.37 | 46   | 4.96   | 55   | 11.77  |   |
| 1782 | Emp3           | 2.37 | 604  | 191.74 | 966  | 454.95 |   |
| 1783 | Zmat1          | 2.37 | 39   | 2.44   | 63   | 5.79   |   |
| 1784 | Zfp358         | 2.37 | 86   | 10.31  | 137  | 24.42  |   |
| 1785 | Gsto1          | 2.37 | 25   | 12.28  | 40   | 29.07  |   |
| 1786 | Creb3l1        | 2.37 | 38   | 3.3    | 61   | 7.82   |   |
| 1787 | Smoc1          | 2.37 | 1923 | 164.37 | 2778 | 388.77 |   |
| 1788 | Zfp772         | 2.36 | 11   | 0.97   | 12   | 2.28   |   |
| 1789 | Hrsp12         | 2.36 | 28   | 6.73   | 54   | 15.88  |   |
| 1790 | Tcea2          | 2.36 | 34   | 3.34   | 37   | 7.88   |   |
| 1791 | Bmpr2          | 2.36 | 821  | 37.67  | 1376 | 88.9   |   |
| 1792 | Polr1c         | 2.36 | 108  | 14.41  | 135  | 34     |   |
| 1793 | Enc1           | 2.36 | 165  | 8.79   | 271  | 20.72  |   |
| 1794 | Ttc5           | 2.36 | 125  | 12.33  | 193  | 29.06  |   |
| 1795 | Nr1d1          | 2.36 | 45   | 4.4    | 70   | 10.37  |   |
| 1796 | Pcid2          | 2.36 | 58   | 4.74   | 99   | 11.18  |   |
| 1797 | Akr1e2         | 2.36 | 145  | 20.4   | 250  | 48.06  |   |
| 1798 | Ccdc53         | 2.36 | 68   | 8.92   | 84   | 21.03  |   |
| 1799 | Zfyve9         | 2.36 | 126  | 5.16   | 198  | 12.16  |   |
| 1800 | Appbp2         | 2.35 | 572  | 20.61  | 936  | 48.49  |   |
| 1801 | Rbmxl1b        | 2.35 | 30   | 6.42   | 43   | 15.1   |   |
| 1802 | Dync2h1        | 2.35 | 94   | 1.97   | 165  | 4.63   |   |
| 1803 | Pmp22          | 2.35 | 18   | 1.63   | 22   | 3.84   |   |
| 1804 | SNORD79        | 2.35 | 13   | 38.11  | 21   | 89.45  |   |
| 1805 | Lysmd4         | 2.35 | 20   | 2.46   | 30   | 5.77   |   |
| 1806 | LOC100910891   | 2.34 | 9    | 17.16  | 5    | 40.23  |   |
| 1807 | Dhodh          | 2.34 | 83   | 4.95   | 161  | 11.59  |   |
| 1808 | Cacfd1         | 2.34 | 129  | 4.4    | 140  | 10.3   |   |
| 1809 | Atp8a1         | 2.34 | 38   | 1.4    | 72   | 3.27   |   |
| 1810 | Fbxl3-ps1      | 2.34 | 21   | 1.03   | 31   | 2.42   |   |
| 1811 | Wdr34          | 2.34 | 46   | 2.05   | 57   | 4.8    |   |
| 1812 | Mrpl36_1       | 2.34 | 15   | 6.69   | 31   | 15.65  |   |
| 1813 | Sphk1          | 2.34 | 24   | 1.52   | 45   | 3.54   |   |
| 1814 | Myocd          | 2.34 | 387  | 14.49  | 641  | 33.86  |   |
| 1815 | Usp11          | 2.34 | 237  | 16.03  | 377  | 37.47  |   |
| 1816 | Zfp192         | 2.34 | 59   | 1.58   | 94   | 3.7    |   |
| 1817 | Rn60_15_0408.6 | 2.33 | 3    | 1.63   | 10   | 3.8    |   |
| 1818 | Gba            | 2.33 | 107  | 13.25  | 162  | 30.9   |   |
| 1819 | Tmem67         | 2.33 | 67   | 2.64   | 97   | 6.17   |   |
| 1820 | Ppox           | 2.33 | 55   | 6.62   | 84   | 15.42  |   |
| 1821 | Ptov1          | 2.33 | 661  | 90.43  | 1055 | 210.68 |   |
| 1822 | Nsmce4a        | 2.33 | 78   | 17.99  | 131  | 41.87  |   |
| 1823 | Ccdc18         | 2.32 | 14   | 0.21   | 18   | 0.5    |   |
| 1824 | Eef2kmt        | 2.32 | 13   | 1.49   | 10   | 3.46   |   |
| 1825 | Fam189b        | 2.32 | 47   | 3.67   | 70   | 8.54   |   |
| 1826 | Ghdc           | 2.32 | 11   | 1.16   | 18   | 2.69   |   |
| 1827 | Hint3          | 2.32 | 22   | 2.31   | 27   | 5.37   |   |
| 1828 | Il18bp         | 2.32 | 11   | 2.67   | 18   | 6.2    |   |
| 1829 | Rnf43          | 2.32 | 25   | 0.53   | 22   | 1.23   |   |
| 1830 | Slc39a8        | 2.32 | 7    | 0.38   | 10   | 0.89   |   |
| 1831 | Zfp316         | 2.32 | 16   | 0.82   | 18   | 1.9    |   |
| 1832 | Zfp773         | 2.32 | 5    | 0.97   | 9    | 2.26   |   |

Supplemental Table 2  
Vehicle versus FSH, 24 hours

|      | A          | B    | C    | D      | E    | F      | G |
|------|------------|------|------|--------|------|--------|---|
| 1833 | LOC687609  | 2.32 | 23   | 0.49   | 22   | 1.14   |   |
| 1834 | Ssbp2      | 2.32 | 159  | 9.13   | 206  | 21.23  |   |
| 1835 | Zfp652     | 2.32 | 42   | 3.3    | 63   | 7.66   |   |
| 1836 | Herpud1    | 2.32 | 251  | 32.74  | 392  | 76.07  |   |
| 1837 | Bnip3l     | 2.32 | 391  | 24.46  | 578  | 56.7   |   |
| 1838 | Cln6       | 2.32 | 45   | 3.61   | 63   | 8.37   |   |
| 1839 | Hcn2       | 2.32 | 39   | 3.14   | 60   | 7.27   |   |
| 1840 | LOC367746  | 2.31 | 53   | 19     | 82   | 43.98  |   |
| 1841 | Pnrc1      | 2.31 | 125  | 19.35  | 198  | 44.75  |   |
| 1842 | Abhd14b    | 2.31 | 52   | 7.49   | 91   | 17.34  |   |
| 1843 | Zfp41      | 2.31 | 54   | 3.53   | 88   | 8.18   |   |
| 1844 | Cox19      | 2.31 | 70   | 3.67   | 92   | 8.48   |   |
| 1845 | Plekhj1    | 2.31 | 46   | 10.27  | 48   | 23.7   |   |
| 1846 | Mknk1      | 2.31 | 95   | 5.94   | 143  | 13.7   |   |
| 1847 | Mis18a     | 2.3  | 43   | 4.85   | 58   | 11.17  |   |
| 1848 | St6gal1    | 2.3  | 72   | 3.86   | 112  | 8.9    |   |
| 1849 | Hps1       | 2.3  | 95   | 5.24   | 151  | 12.06  |   |
| 1850 | AC126148.3 | 2.3  | 0    | 1.9    | 0    | 4.38   |   |
| 1851 | Polr3gl    | 2.3  | 38   | 1.41   | 36   | 3.24   |   |
| 1852 | Sirt2      | 2.3  | 131  | 12.47  | 210  | 28.69  |   |
| 1853 | Smpdl3b    | 2.3  | 36   | 3.64   | 58   | 8.39   |   |
| 1854 | Sned1      | 2.3  | 38   | 1.07   | 59   | 2.46   |   |
| 1855 | Zfp398     | 2.3  | 72   | 2.6    | 80   | 5.97   |   |
| 1856 | Sp4        | 2.3  | 37   | 1.73   | 52   | 3.98   |   |
| 1857 | Zfp395     | 2.3  | 150  | 8.45   | 228  | 19.43  |   |
| 1858 | Esr2       | 2.3  | 475  | 22.03  | 706  | 50.58  |   |
| 1859 | Agap1      | 2.3  | 192  | 5.02   | 332  | 11.53  |   |
| 1860 | Ephb4      | 2.3  | 497  | 29.32  | 759  | 67.31  |   |
| 1861 | Ephb6      | 2.29 | 118  | 6.99   | 189  | 16.03  |   |
| 1862 | Tmem260    | 2.29 | 164  | 4.02   | 221  | 9.21   |   |
| 1863 | Ice2       | 2.29 | 63   | 2.64   | 87   | 6.06   |   |
| 1864 | RGD1311756 | 2.29 | 67   | 1.85   | 105  | 4.25   |   |
| 1865 | Bckdhb     | 2.29 | 45   | 4.34   | 53   | 9.94   |   |
| 1866 | Acot8      | 2.29 | 18   | 3.23   | 17   | 7.39   |   |
| 1867 | Ccdc61     | 2.29 | 53   | 2.58   | 69   | 5.92   |   |
| 1868 | Tpst2      | 2.29 | 68   | 4.71   | 73   | 10.8   |   |
| 1869 | Mettl7a    | 2.29 | 43   | 4.63   | 65   | 10.6   |   |
| 1870 | Tenm3      | 2.29 | 223  | 6.52   | 347  | 14.93  |   |
| 1871 | Atp8b3     | 2.28 | 12   | 0.4    | 16   | 0.91   |   |
| 1872 | Cyb561d1   | 2.28 | 15   | 2.01   | 25   | 4.58   |   |
| 1873 | SNORD82    | 2.28 | 0    | 24.22  | 0    | 55.32  |   |
| 1874 | Baiap3     | 2.28 | 4    | 0.31   | 11   | 0.71   |   |
| 1875 | E2f2       | 2.28 | 10   | 0.37   | 14   | 0.84   |   |
| 1876 | Kcnab3     | 2.28 | 7    | 0.83   | 12   | 1.89   |   |
| 1877 | Pim2       | 2.28 | 9    | 0.67   | 12   | 1.52   |   |
| 1878 | Rhbdl3     | 2.28 | 53   | 2.33   | 80   | 5.31   |   |
| 1879 | Sdhaf1     | 2.28 | 47   | 14.72  | 73   | 33.61  |   |
| 1880 | Mgst1      | 2.28 | 209  | 51.14  | 333  | 116.62 |   |
| 1881 | Bmpr1b     | 2.28 | 354  | 42.25  | 566  | 96.28  |   |
| 1882 | Tmem59     | 2.28 | 391  | 57.65  | 597  | 131.37 |   |
| 1883 | Vps41      | 2.28 | 177  | 13.19  | 273  | 30.03  |   |
| 1884 | Ckb        | 2.27 | 23   | 3.7    | 37   | 8.41   |   |
| 1885 | Sulf2      | 2.27 | 344  | 18.81  | 520  | 42.79  |   |
| 1886 | Foxo1      | 2.27 | 2228 | 152.61 | 3231 | 346.79 |   |

Supplemental Table 2  
Vehicle versus FSH, 24 hours

|      | A              | B    | C   | D     | E   | F     | G |
|------|----------------|------|-----|-------|-----|-------|---|
| 1887 | Trappc2        | 2.27 | 31  | 2.92  | 33  | 6.63  |   |
| 1888 | Sema4c         | 2.27 | 123 | 6.64  | 195 | 15.08 |   |
| 1889 | Camk1d         | 2.27 | 68  | 1.4   | 82  | 3.18  |   |
| 1890 | Snrnp25        | 2.27 | 44  | 11.05 | 57  | 25.02 |   |
| 1891 | Acadm          | 2.26 | 91  | 9.82  | 143 | 22.25 |   |
| 1892 | Fut10          | 2.26 | 48  | 2.76  | 77  | 6.26  |   |
| 1893 | Itm2a          | 2.26 | 14  | 1.39  | 15  | 3.14  |   |
| 1894 | Qrs1           | 2.26 | 25  | 1.1   | 31  | 2.48  |   |
| 1895 | Ttc38          | 2.26 | 19  | 1.12  | 29  | 2.53  |   |
| 1896 | Dzank1         | 2.26 | 24  | 0.89  | 34  | 2     |   |
| 1897 | Tbc1d32        | 2.26 | 29  | 0.57  | 38  | 1.3   |   |
| 1898 | Fibp           | 2.25 | 126 | 24.58 | 194 | 55.42 |   |
| 1899 | Rnf13          | 2.25 | 260 | 13.06 | 259 | 29.45 |   |
| 1900 | Jag2           | 2.25 | 26  | 1.1   | 34  | 2.48  |   |
| 1901 | Sucla2         | 2.25 | 224 | 22.39 | 326 | 50.36 |   |
| 1902 | Cyp2u1         | 2.25 | 76  | 4.05  | 117 | 9.12  |   |
| 1903 | Npr12          | 2.25 | 38  | 5.35  | 53  | 12.02 |   |
| 1904 | Rn60_20_0056.5 | 2.25 | 11  | 5.19  | 17  | 11.66 |   |
| 1905 | Tcf7           | 2.25 | 36  | 1.77  | 33  | 3.97  |   |
| 1906 | Tspan17        | 2.25 | 29  | 3.32  | 42  | 7.46  |   |
| 1907 | Pddc1          | 2.24 | 18  | 9.47  | 22  | 21.24 |   |
| 1908 | Zfp52          | 2.24 | 68  | 3.53  | 106 | 7.91  |   |
| 1909 | Cplx2          | 2.24 | 77  | 5.03  | 110 | 11.26 |   |
| 1910 | Grcc10         | 2.24 | 33  | 25.61 | 42  | 57.24 |   |
| 1911 | Nfs1           | 2.24 | 14  | 4.84  | 22  | 10.82 |   |
| 1912 | Rfesd          | 2.24 | 16  | 4.2   | 20  | 9.39  |   |
| 1913 | Rpain          | 2.24 | 36  | 4.21  | 43  | 9.42  |   |
| 1914 | Decr1          | 2.23 | 125 | 17.64 | 176 | 39.4  |   |
| 1915 | Abcd2          | 2.23 | 29  | 0.68  | 44  | 1.51  |   |
| 1916 | Dym            | 2.23 | 121 | 6.93  | 163 | 15.44 |   |
| 1917 | Stom1          | 2.23 | 22  | 1.72  | 28  | 3.83  |   |
| 1918 | Zp2            | 2.23 | 21  | 1.68  | 30  | 3.74  |   |
| 1919 | Sesn1          | 2.23 | 63  | 3.39  | 98  | 7.56  |   |
| 1920 | Tcf7l2         | 2.23 | 135 | 5.65  | 199 | 12.57 |   |
| 1921 | Cpped1         | 2.23 | 50  | 3.85  | 84  | 8.57  |   |
| 1922 | Tmem161a       | 2.22 | 56  | 5.78  | 81  | 12.85 |   |
| 1923 | Mfsd11         | 2.22 | 80  | 5.7   | 127 | 12.68 |   |
| 1924 | Cd320          | 2.22 | 44  | 6.5   | 60  | 14.44 |   |
| 1925 | Fbxo7          | 2.22 | 109 | 10.97 | 154 | 24.39 |   |
| 1926 | Rilpl2         | 2.22 | 39  | 6.57  | 60  | 14.61 |   |
| 1927 | Plekhd1        | 2.22 | 21  | 1.26  | 28  | 2.8   |   |
| 1928 | Zcchc4         | 2.22 | 43  | 1.71  | 48  | 3.81  |   |
| 1929 | Gpatch4        | 2.22 | 46  | 4.79  | 108 | 10.63 |   |
| 1930 | Tspan9         | 2.22 | 278 | 14.63 | 431 | 32.43 |   |
| 1931 | Ltbp3          | 2.22 | 526 | 28.56 | 793 | 63.27 |   |
| 1932 | Osbpl6         | 2.22 | 89  | 1.96  | 118 | 4.34  |   |
| 1933 | AABR07011996.1 | 2.21 | 21  | 1.54  | 33  | 3.42  |   |
| 1934 | Pdpx           | 2.21 | 23  | 2.63  | 34  | 5.83  |   |
| 1935 | Zfp169         | 2.21 | 24  | 1.95  | 40  | 4.32  |   |
| 1936 | Kcnmb4         | 2.21 | 41  | 4.77  | 48  | 10.55 |   |
| 1937 | Nrip1          | 2.21 | 379 | 10.21 | 590 | 22.57 |   |
| 1938 | Nelfcd         | 2.21 | 141 | 13.68 | 207 | 30.22 |   |
| 1939 | AABR07009715.1 | 2.21 | 13  | 7.93  | 24  | 17.5  |   |
| 1940 | Mapkapk3       | 2.2  | 159 | 13.87 | 239 | 30.57 |   |

Supplemental Table 2  
Vehicle versus FSH, 24 hours

|      | A              | B    | C   | D     | E   | F     | G |
|------|----------------|------|-----|-------|-----|-------|---|
| 1941 | RGD1562299     | 2.2  | 94  | 3.51  | 119 | 7.74  |   |
| 1942 | Mxd1           | 2.2  | 40  | 1.92  | 64  | 4.23  |   |
| 1943 | Sipa1l3        | 2.2  | 161 | 3.78  | 258 | 8.3   |   |
| 1944 | Pan3           | 2.2  | 295 | 12.75 | 423 | 28.01 |   |
| 1945 | Ermp1          | 2.2  | 298 | 13.32 | 439 | 29.25 |   |
| 1946 | Bnc2           | 2.2  | 190 | 5.2   | 353 | 11.43 |   |
| 1947 | Slc22a23       | 2.19 | 143 | 4.57  | 252 | 10.01 |   |
| 1948 | Nt5c3b         | 2.19 | 145 | 7.88  | 185 | 17.26 |   |
| 1949 | Atg13          | 2.19 | 115 | 15.09 | 161 | 33.01 |   |
| 1950 | Ilvbl          | 2.19 | 111 | 9.37  | 167 | 20.5  |   |
| 1951 | Sgpp1          | 2.19 | 242 | 18.19 | 352 | 39.77 |   |
| 1952 | Fcgrt          | 2.19 | 116 | 16.88 | 164 | 36.91 |   |
| 1953 | Prpsap2        | 2.19 | 151 | 15.06 | 225 | 32.93 |   |
| 1954 | LOC100365839   | 2.18 | 0   | 0.58  | 0   | 1.26  |   |
| 1955 | Sdk1           | 2.18 | 19  | 0.3   | 41  | 0.65  |   |
| 1956 | SNORA61_15     | 2.18 | 0   | 3.83  | 0   | 8.36  |   |
| 1957 | Tmem150b       | 2.18 | 8   | 0.52  | 11  | 1.13  |   |
| 1958 | 3082ex4-5      | 2.18 | 4   | 3.18  | 6   | 6.94  |   |
| 1959 | AABR07001099.1 | 2.18 | 4   | 0.62  | 7   | 1.36  |   |
| 1960 | AABR07010570.1 | 2.18 | 0   | 0.77  | 0   | 1.67  |   |
| 1961 | AABR07030603.1 | 2.18 | 2   | 1.58  | 3   | 3.45  |   |
| 1962 | AABR07034940.2 | 2.18 | 11  | 0.94  | 37  | 2.05  |   |
| 1963 | AABR07044933.1 | 2.18 | 0   | 0.97  | 1   | 2.11  |   |
| 1964 | AABR07045217.1 | 2.18 | 4   | 1.24  | 5   | 2.69  |   |
| 1965 | AABR07054264.1 | 2.18 | 2   | 2.6   | 3   | 5.66  |   |
| 1966 | Abtb2          | 2.18 | 87  | 2.11  | 84  | 4.59  |   |
| 1967 | AC096326.1     | 2.18 | 14  | 0.68  | 14  | 1.49  |   |
| 1968 | Acot2          | 2.18 | 14  | 1.89  | 24  | 4.12  |   |
| 1969 | Akr1b1-ps2     | 2.18 | 2   | 0.53  | 2   | 1.15  |   |
| 1970 | Ankrd6         | 2.18 | 17  | 0.3   | 17  | 0.65  |   |
| 1971 | BC024978       | 2.18 | 15  | 1.75  | 23  | 3.81  |   |
| 1972 | Bnc1           | 2.18 | 3   | 0.11  | 3   | 0.23  |   |
| 1973 | Bola2          | 2.18 | 0   | 1.93  | 1   | 4.21  |   |
| 1974 | Btbd16         | 2.18 | 9   | 0.26  | 9   | 0.57  |   |
| 1975 | Cadps          | 2.18 | 27  | 0.29  | 29  | 0.63  |   |
| 1976 | Camk2n2        | 2.18 | 5   | 1.13  | 3   | 2.46  |   |
| 1977 | Ccdc155        | 2.18 | 3   | 0.27  | 4   | 0.59  |   |
| 1978 | Cd14           | 2.18 | 36  | 5.28  | 54  | 11.51 |   |
| 1979 | Comtd1         | 2.18 | 23  | 2.38  | 36  | 5.18  |   |
| 1980 | Crispld1       | 2.18 | 3   | 0.22  | 6   | 0.49  |   |
| 1981 | Crnk1l_2       | 2.18 | 0   | 0.21  | 0   | 0.46  |   |
| 1982 | Csf1r          | 2.18 | 14  | 0.13  | 4   | 0.27  |   |
| 1983 | Dnajc22        | 2.18 | 3   | 0.34  | 4   | 0.74  |   |
| 1984 | Dnase2         | 2.18 | 23  | 3.84  | 34  | 8.37  |   |
| 1985 | Doc2g          | 2.18 | 2   | 0.34  | 4   | 0.74  |   |
| 1986 | Elavl2         | 2.18 | 18  | 0.36  | 17  | 0.79  |   |
| 1987 | Fam161b        | 2.18 | 7   | 0.56  | 6   | 1.23  |   |
| 1988 | Fam21c         | 2.18 | 352 | 18.38 | 523 | 40.07 |   |
| 1989 | Fbxo16         | 2.18 | 23  | 1.58  | 23  | 3.44  |   |
| 1990 | Gal            | 2.18 | 3   | 0.59  | 3   | 1.29  |   |
| 1991 | Gnpda2         | 2.18 | 10  | 0.82  | 9   | 1.79  |   |
| 1992 | Gria2          | 2.18 | 11  | 0.07  | 5   | 0.16  |   |
| 1993 | Gtpbp3         | 2.18 | 32  | 2.75  | 46  | 6     |   |
| 1994 | Hmg1l1_2       | 2.18 | 0   | 2.33  | 1   | 5.08  |   |

Supplemental Table 2  
Vehicle versus FSH, 24 hours

|      | A              | B    | C  | D    | E   | F     | G |
|------|----------------|------|----|------|-----|-------|---|
| 1995 | Ifi47          | 2.18 | 4  | 0.53 | 6   | 1.16  |   |
| 1996 | Kank4          | 2.18 | 4  | 0.1  | 10  | 0.23  |   |
| 1997 | Kbtbd8         | 2.18 | 16 | 0.7  | 22  | 1.53  |   |
| 1998 | LOC100910316   | 2.18 | 2  | 0.33 | 2   | 0.71  |   |
| 1999 | LOC100911874_1 | 2.18 | 0  | 0.35 | 0   | 0.75  |   |
| 2000 | LOC102553099   | 2.18 | 0  | 2.9  | 0   | 6.33  |   |
| 2001 | LOC102554393   | 2.18 | 4  | 0.11 | 13  | 0.25  |   |
| 2002 | LOC500956      | 2.18 | 9  | 1.25 | 14  | 2.72  |   |
| 2003 | LOC688286      | 2.18 | 6  | 0.42 | 14  | 0.91  |   |
| 2004 | Lysmd2         | 2.18 | 66 | 6.65 | 95  | 14.5  |   |
| 2005 | Magel2         | 2.18 | 6  | 0.4  | 9   | 0.86  |   |
| 2006 | Metrn          | 2.18 | 2  | 0.54 | 3   | 1.18  |   |
| 2007 | Mogat1         | 2.18 | 5  | 0.41 | 2   | 0.9   |   |
| 2008 | Mycbpap        | 2.18 | 2  | 0.14 | 6   | 0.32  |   |
| 2009 | Myo15b         | 2.18 | 7  | 0.05 | 8   | 0.1   |   |
| 2010 | Notch1         | 2.18 | 21 | 0.47 | 30  | 1.03  |   |
| 2011 | Npff           | 2.18 | 3  | 1.13 | 6   | 2.46  |   |
| 2012 | Nr0b2          | 2.18 | 6  | 1.35 | 11  | 2.93  |   |
| 2013 | Nudt16         | 2.18 | 9  | 1.26 | 13  | 2.75  |   |
| 2014 | Nudt7          | 2.18 | 48 | 2.34 | 97  | 5.1   |   |
| 2015 | Ogfrl1         | 2.18 | 7  | 0.58 | 6   | 1.27  |   |
| 2016 | Oxld1          | 2.18 | 9  | 1.58 | 9   | 3.45  |   |
| 2017 | Pex12          | 2.18 | 15 | 1.49 | 21  | 3.24  |   |
| 2018 | Ppidl1         | 2.18 | 2  | 0.37 | 3   | 0.82  |   |
| 2019 | Rasgrp1        | 2.18 | 5  | 0.14 | 6   | 0.3   |   |
| 2020 | Rfx8           | 2.18 | 14 | 0.28 | 14  | 0.61  |   |
| 2021 | RGD1304870     | 2.18 | 4  | 2.84 | 6   | 6.19  |   |
| 2022 | Rn60_4_1361.1  | 2.18 | 0  | 0.23 | 0   | 0.51  |   |
| 2023 | Rn60_X_0635.3  | 2.18 | 2  | 0.49 | 3   | 1.07  |   |
| 2024 | Rnf185         | 2.18 | 93 | 6.87 | 137 | 14.97 |   |
| 2025 | Rpl37_2        | 2.18 | 0  | 2.87 | 0   | 6.26  |   |
| 2026 | RT1-M6-1       | 2.18 | 22 | 0.21 | 16  | 0.45  |   |
| 2027 | Saysd1         | 2.18 | 8  | 2.65 | 15  | 5.78  |   |
| 2028 | Scn8a          | 2.18 | 5  | 0.07 | 6   | 0.16  |   |
| 2029 | Sdr42e1        | 2.18 | 2  | 0.19 | 6   | 0.42  |   |
| 2030 | Slc50a1        | 2.18 | 43 | 8.43 | 59  | 18.37 |   |
| 2031 | Smim8          | 2.18 | 10 | 1.36 | 20  | 2.96  |   |
| 2032 | Smpd3          | 2.18 | 8  | 0.1  | 4   | 0.22  |   |
| 2033 | SNORA71_5      | 2.18 | 2  | 3.78 | 3   | 8.23  |   |
| 2034 | SNORD113_21    | 2.18 | 0  | 5.25 | 0   | 11.43 |   |
| 2035 | SNORD24_1      | 2.18 | 0  | 6.64 | 0   | 14.48 |   |
| 2036 | Sox13          | 2.18 | 11 | 0.49 | 15  | 1.06  |   |
| 2037 | Tbcc           | 2.18 | 0  | 0.43 | 0   | 0.94  |   |
| 2038 | Tmem106c       | 2.18 | 36 | 6.06 | 53  | 13.2  |   |
| 2039 | Trpv6          | 2.18 | 20 | 0.68 | 30  | 1.49  |   |
| 2040 | Tuba1c_1       | 2.18 | 0  | 1.11 | 0   | 2.42  |   |
| 2041 | Ulk4           | 2.18 | 37 | 0.93 | 43  | 2.03  |   |
| 2042 | Upk1b          | 2.18 | 2  | 0.27 | 7   | 0.59  |   |
| 2043 | Uros           | 2.18 | 10 | 1.27 | 18  | 2.76  |   |
| 2044 | Yipf2          | 2.18 | 46 | 6.74 | 60  | 14.69 |   |
| 2045 | Zc3h8          | 2.18 | 19 | 1.59 | 27  | 3.47  |   |
| 2046 | AABR07036007.1 | 2.18 | 3  | 4.34 | 4   | 9.47  |   |
| 2047 | AABR07048957.1 | 2.18 | 0  | 1.2  | 0   | 2.6   |   |
| 2048 | Ephb2          | 2.18 | 6  | 0.1  | 5   | 0.22  |   |

Supplemental Table 2  
Vehicle versus FSH, 24 hours

|      | A              | B    | C    | D     | E    | F      | G |
|------|----------------|------|------|-------|------|--------|---|
| 2049 | Fndc3c1        | 2.18 | 3    | 0.12  | 4    | 0.26   |   |
| 2050 | Gmpr           | 2.18 | 6    | 0.7   | 13   | 1.52   |   |
| 2051 | Hspb11         | 2.18 | 17   | 1.2   | 20   | 2.62   |   |
| 2052 | Kcnab2         | 2.18 | 9    | 0.25  | 12   | 0.55   |   |
| 2053 | Kcnc3          | 2.18 | 5    | 0.09  | 7    | 0.19   |   |
| 2054 | Kcp            | 2.18 | 4    | 0.11  | 4    | 0.23   |   |
| 2055 | Klf15          | 2.18 | 49   | 2.67  | 68   | 5.82   |   |
| 2056 | Layn           | 2.18 | 4    | 0.25  | 11   | 0.55   |   |
| 2057 | Leap2          | 2.18 | 2    | 2.64  | 2    | 5.75   |   |
| 2058 | LOC500077      | 2.18 | 8    | 1.23  | 15   | 2.69   |   |
| 2059 | LOC679683      | 2.18 | 0    | 1.03  | 1    | 2.25   |   |
| 2060 | Mtcp1_1        | 2.18 | 4    | 4.89  | 6    | 10.65  |   |
| 2061 | Pabpc1l2a      | 2.18 | 18   | 7.11  | 27   | 15.49  |   |
| 2062 | Ptch2          | 2.18 | 2    | 0.1   | 6    | 0.22   |   |
| 2063 | Rapgef3        | 2.18 | 21   | 0.74  | 19   | 1.6    |   |
| 2064 | Rps6kl1        | 2.18 | 9    | 0.31  | 4    | 0.67   |   |
| 2065 | Spa17          | 2.18 | 6    | 1.47  | 12   | 3.21   |   |
| 2066 | Tsga10         | 2.18 | 11   | 0.19  | 18   | 0.4    |   |
| 2067 | Neo1           | 2.17 | 417  | 19.21 | 614  | 41.76  |   |
| 2068 | Slc45a4        | 2.17 | 86   | 6.51  | 132  | 14.14  |   |
| 2069 | Cand2          | 2.16 | 63   | 2.74  | 81   | 5.94   |   |
| 2070 | Ginm1          | 2.16 | 122  | 19.17 | 160  | 41.49  |   |
| 2071 | Ralgapa2       | 2.16 | 83   | 2.09  | 179  | 4.52   |   |
| 2072 | Suox           | 2.16 | 48   | 5.34  | 70   | 11.56  |   |
| 2073 | Smarcd1        | 2.16 | 259  | 17.85 | 355  | 38.58  |   |
| 2074 | Abcd3          | 2.15 | 689  | 42.13 | 1030 | 90.79  |   |
| 2075 | Rhbdd3         | 2.15 | 38   | 3.91  | 51   | 8.42   |   |
| 2076 | Rnasel         | 2.15 | 30   | 1.51  | 44   | 3.25   |   |
| 2077 | Rabl2a         | 2.15 | 38   | 3.6   | 47   | 7.74   |   |
| 2078 | Ankmy2         | 2.15 | 170  | 14.21 | 271  | 30.56  |   |
| 2079 | LOC497940      | 2.15 | 68   | 4.28  | 73   | 9.21   |   |
| 2080 | Slc9a6         | 2.15 | 104  | 3.82  | 148  | 8.21   |   |
| 2081 | Ccng2          | 2.15 | 128  | 12    | 193  | 25.79  |   |
| 2082 | Scarb2         | 2.15 | 412  | 42.96 | 618  | 92.29  |   |
| 2083 | Echs1          | 2.15 | 0    | 3.83  | 0    | 8.22   |   |
| 2084 | LOC100910318_1 | 2.15 | 9    | 5.43  | 10   | 11.66  |   |
| 2085 | Rprd1a         | 2.15 | 102  | 5.18  | 81   | 11.12  |   |
| 2086 | Pex6           | 2.15 | 69   | 3.09  | 95   | 6.64   |   |
| 2087 | Cc2d2a         | 2.15 | 102  | 3.31  | 154  | 7.1    |   |
| 2088 | Slc36a4        | 2.15 | 77   | 5.46  | 104  | 11.72  |   |
| 2089 | Relb           | 2.15 | 39   | 2.68  | 45   | 5.76   |   |
| 2090 | Slc6a8         | 2.15 | 181  | 10.69 | 264  | 22.93  |   |
| 2091 | Cnrip1         | 2.15 | 25   | 3.17  | 34   | 6.8    |   |
| 2092 | RGD1561582     | 2.14 | 63   | 7.38  | 93   | 15.82  |   |
| 2093 | Them6          | 2.14 | 19   | 3.07  | 30   | 6.57   |   |
| 2094 | Acaa2          | 2.14 | 94   | 13.92 | 150  | 29.78  |   |
| 2095 | Ralgps2        | 2.14 | 46   | 3.64  | 72   | 7.79   |   |
| 2096 | Bscl2          | 2.14 | 71   | 11.65 | 97   | 24.9   |   |
| 2097 | Me1            | 2.14 | 1329 | 88.57 | 1973 | 189.28 |   |
| 2098 | Camta1_2       | 2.14 | 15   | 7.25  | 23   | 15.5   |   |
| 2099 | Psmb9          | 2.14 | 17   | 4.62  | 25   | 9.87   |   |
| 2100 | Tmem143        | 2.14 | 34   | 2.13  | 51   | 4.55   |   |
| 2101 | Tmod2          | 2.14 | 27   | 3.2   | 48   | 6.85   |   |
| 2102 | Ccnd2          | 2.14 | 535  | 83.17 | 829  | 177.71 |   |

Supplemental Table 2  
Vehicle versus FSH, 24 hours

|      | A            | B    | C    | D      | E    | F      | G |
|------|--------------|------|------|--------|------|--------|---|
| 2103 | Mettl20      | 2.13 | 21   | 2.33   | 31   | 4.96   |   |
| 2104 | Tm2d3        | 2.13 | 31   | 4.83   | 39   | 10.29  |   |
| 2105 | Senp17_2     | 2.13 | 23   | 5.23   | 28   | 11.16  |   |
| 2106 | Noa1         | 2.13 | 61   | 4.32   | 81   | 9.21   |   |
| 2107 | Dcakd        | 2.13 | 263  | 27.79  | 366  | 59.13  |   |
| 2108 | Dcaf4        | 2.13 | 48   | 3.45   | 68   | 7.34   |   |
| 2109 | Emc4         | 2.13 | 81   | 14.71  | 129  | 31.3   |   |
| 2110 | Vars2        | 2.13 | 60   | 3.27   | 89   | 6.95   |   |
| 2111 | Eif3h_1      | 2.13 | 66   | 46.15  | 97   | 98.14  |   |
| 2112 | Fkbp4        | 2.13 | 340  | 29.34  | 486  | 62.36  |   |
| 2113 | Ifnar2       | 2.12 | 168  | 14.53  | 213  | 30.87  |   |
| 2114 | Nfkbie       | 2.12 | 13   | 2.02   | 19   | 4.29   |   |
| 2115 | Panx2        | 2.12 | 18   | 1.11   | 33   | 2.36   |   |
| 2116 | Rad54l       | 2.12 | 21   | 1.16   | 29   | 2.46   |   |
| 2117 | RGD1565498   | 2.12 | 31   | 1.98   | 41   | 4.21   |   |
| 2118 | Sirpa        | 2.12 | 16   | 0.8    | 22   | 1.71   |   |
| 2119 | Zfp524       | 2.12 | 13   | 3.09   | 19   | 6.56   |   |
| 2120 | Spin2a       | 2.12 | 16   | 4.47   | 12   | 9.48   |   |
| 2121 | Accs         | 2.12 | 27   | 2.78   | 44   | 5.88   |   |
| 2122 | Pc           | 2.12 | 32   | 1.33   | 39   | 2.82   |   |
| 2123 | Six5         | 2.12 | 50   | 5.53   | 70   | 11.72  |   |
| 2124 | Tap2_2       | 2.12 | 1    | 2.17   | 1    | 4.61   |   |
| 2125 | Pcyt1a       | 2.12 | 884  | 47.69  | 1277 | 101.04 |   |
| 2126 | Fzd3         | 2.12 | 54   | 3.17   | 74   | 6.72   |   |
| 2127 | Top3a        | 2.12 | 67   | 3.66   | 99   | 7.75   |   |
| 2128 | Add3         | 2.12 | 184  | 9.54   | 284  | 20.2   |   |
| 2129 | Akr1c14      | 2.12 | 2472 | 256.22 | 3577 | 542.17 |   |
| 2130 | Zbed3        | 2.12 | 59   | 7.85   | 87   | 16.6   |   |
| 2131 | Churc1       | 2.11 | 70   | 17.46  | 90   | 36.9   |   |
| 2132 | LOC257650    | 2.11 | 81   | 1.43   | 79   | 3.03   |   |
| 2133 | Rnf170       | 2.11 | 35   | 5.6    | 42   | 11.85  |   |
| 2134 | Taz          | 2.11 | 76   | 9.21   | 120  | 19.47  |   |
| 2135 | Arhgef9      | 2.11 | 51   | 1.03   | 55   | 2.17   |   |
| 2136 | Ephb3        | 2.11 | 12   | 0.68   | 23   | 1.45   |   |
| 2137 | Map7         | 2.11 | 72   | 2.66   | 140  | 5.63   |   |
| 2138 | Mthfr        | 2.11 | 101  | 6.15   | 140  | 12.99  |   |
| 2139 | Ybx1-ps3     | 2.11 | 7    | 10.64  | 12   | 22.46  |   |
| 2140 | Pced1a       | 2.11 | 58   | 4.23   | 69   | 8.93   |   |
| 2141 | Gdpd1        | 2.11 | 72   | 5.68   | 92   | 11.97  |   |
| 2142 | RGD1565685   | 2.11 | 58   | 5.94   | 76   | 12.52  |   |
| 2143 | Wdr62_1      | 2.11 | 1    | 1.04   | 2    | 2.19   |   |
| 2144 | Abcb6        | 2.1  | 37   | 2.5    | 49   | 5.26   |   |
| 2145 | Lrrc75a      | 2.1  | 41   | 9.3    | 58   | 19.57  |   |
| 2146 | Tmem41a      | 2.1  | 34   | 4.57   | 46   | 9.62   |   |
| 2147 | Zfp161       | 2.1  | 51   | 3.24   | 71   | 6.81   |   |
| 2148 | LOC102551660 | 2.1  | 72   | 5.27   | 99   | 11.08  |   |
| 2149 | Yipf6        | 2.1  | 120  | 6.75   | 176  | 14.17  |   |
| 2150 | Ganc         | 2.1  | 40   | 1.4    | 66   | 2.93   |   |
| 2151 | Mrpl1        | 2.1  | 0    | 2.02   | 1    | 4.24   |   |
| 2152 | Ogg1         | 2.1  | 18   | 2.96   | 33   | 6.21   |   |
| 2153 | Podxl        | 2.1  | 11   | 0.39   | 18   | 0.82   |   |
| 2154 | Tas1r2       | 2.1  | 116  | 1.49   | 106  | 3.13   |   |
| 2155 | Wdr91        | 2.1  | 51   | 2.6    | 63   | 5.47   |   |
| 2156 | Znrd1as1     | 2.1  | 15   | 0.79   | 14   | 1.66   |   |



Supplemental Table 2  
Vehicle versus FSH, 24 hours

|      | A              | B    | C    | D     | E    | F     | G |
|------|----------------|------|------|-------|------|-------|---|
| 2157 | AABR07004894.1 | 2.1  | 0    | 3.87  | 1    | 8.13  |   |
| 2158 | Adgrv1         | 2.1  | 20   | 0.1   | 33   | 0.2   |   |
| 2159 | Arrdc2         | 2.1  | 16   | 0.97  | 16   | 2.03  |   |
| 2160 | Tmem241        | 2.1  | 33   | 1.94  | 51   | 4.08  |   |
| 2161 | Vamp2          | 2.1  | 179  | 18.08 | 241  | 37.92 |   |
| 2162 | Msi1           | 2.09 | 44   | 2.93  | 63   | 6.13  |   |
| 2163 | Lrrc8d         | 2.09 | 250  | 18.68 | 346  | 39.11 |   |
| 2164 | Naa40          | 2.09 | 108  | 5.71  | 137  | 11.94 |   |
| 2165 | Traf3          | 2.09 | 187  | 6.06  | 321  | 12.65 |   |
| 2166 | Vkorc1l1_2     | 2.09 | 0    | 3.87  | 1    | 8.08  |   |
| 2167 | Hagh           | 2.09 | 39   | 6.73  | 54   | 14.07 |   |
| 2168 | Slc25a20       | 2.09 | 140  | 16.45 | 197  | 34.33 |   |
| 2169 | Paox           | 2.08 | 39   | 3.59  | 55   | 7.49  |   |
| 2170 | RGD1305089     | 2.08 | 47   | 3.2   | 67   | 6.67  |   |
| 2171 | Zfp18          | 2.08 | 44   | 4.47  | 52   | 9.32  |   |
| 2172 | Acvr1b         | 2.08 | 95   | 3.7   | 120  | 7.7   |   |
| 2173 | Zfp553         | 2.08 | 74   | 8.5   | 104  | 17.69 |   |
| 2174 | Arhgef28       | 2.08 | 447  | 10.82 | 740  | 22.5  |   |
| 2175 | Mlst8          | 2.08 | 79   | 6.92  | 100  | 14.38 |   |
| 2176 | AABR07058124.3 | 2.08 | 13   | 11.18 | 20   | 23.21 |   |
| 2177 | LOC100912512   | 2.08 | 13   | 0.65  | 12   | 1.35  |   |
| 2178 | Klhl14         | 2.08 | 22   | 0.43  | 18   | 0.89  |   |
| 2179 | LOC102546354   | 2.08 | 9    | 1.12  | 26   | 2.32  |   |
| 2180 | LOC102555083   | 2.08 | 0    | 1.09  | 0    | 2.26  |   |
| 2181 | Ppm1h          | 2.08 | 52   | 0.72  | 60   | 1.5   |   |
| 2182 | Smyd4          | 2.08 | 24   | 1.02  | 30   | 2.11  |   |
| 2183 | Zfp617         | 2.08 | 15   | 2.35  | 20   | 4.88  |   |
| 2184 | Tmem9          | 2.07 | 220  | 29.4  | 292  | 60.96 |   |
| 2185 | Slc48a1        | 2.07 | 74   | 10.93 | 107  | 22.66 |   |
| 2186 | Scaper         | 2.07 | 118  | 2.22  | 247  | 4.6   |   |
| 2187 | LOC102723236_1 | 2.07 | 0    | 39.04 | 0    | 80.86 |   |
| 2188 | Triobp         | 2.07 | 77   | 2.68  | 104  | 5.54  |   |
| 2189 | Cpt2           | 2.07 | 87   | 8.61  | 120  | 17.79 |   |
| 2190 | Fam63a         | 2.06 | 126  | 14.63 | 176  | 30.19 |   |
| 2191 | Pik3r4         | 2.06 | 170  | 7.31  | 222  | 15.06 |   |
| 2192 | Wdr6           | 2.06 | 556  | 31.43 | 807  | 64.76 |   |
| 2193 | Nr2f2          | 2.06 | 148  | 10.79 | 183  | 22.22 |   |
| 2194 | Polr2c         | 2.06 | 121  | 22.07 | 167  | 45.45 |   |
| 2195 | Rpgr           | 2.06 | 30   | 1.12  | 38   | 2.31  |   |
| 2196 | Chrm4          | 2.06 | 28   | 2.17  | 39   | 4.47  |   |
| 2197 | Hps4           | 2.06 | 69   | 4.12  | 102  | 8.47  |   |
| 2198 | Letm2          | 2.06 | 32   | 1.74  | 56   | 3.58  |   |
| 2199 | Mum1l1         | 2.06 | 24   | 1.47  | 35   | 3.02  |   |
| 2200 | Renbp          | 2.06 | 22   | 2.31  | 24   | 4.76  |   |
| 2201 | Runx2          | 2.06 | 38   | 0.53  | 61   | 1.09  |   |
| 2202 | Sytl4          | 2.06 | 19   | 1.24  | 26   | 2.54  |   |
| 2203 | Tmem203        | 2.06 | 12   | 3.61  | 17   | 7.42  |   |
| 2204 | Tstd3          | 2.06 | 13   | 1.87  | 17   | 3.86  |   |
| 2205 | Pcmt2          | 2.06 | 146  | 7.09  | 201  | 14.6  |   |
| 2206 | Hyal2          | 2.06 | 177  | 21.35 | 242  | 43.9  |   |
| 2207 | Samd8          | 2.06 | 268  | 8.93  | 365  | 18.35 |   |
| 2208 | Dolk           | 2.06 | 81   | 10.02 | 116  | 20.6  |   |
| 2209 | Man2a1         | 2.05 | 1228 | 39.01 | 1752 | 80.15 |   |
| 2210 | Etv1           | 2.05 | 74   | 2.09  | 89   | 4.3   |   |

Supplemental Table 2  
Vehicle versus FSH, 24 hours

|      | A              | B    | C   | D     | E   | F     | G |
|------|----------------|------|-----|-------|-----|-------|---|
| 2211 | Iba57          | 2.05 | 41  | 1.84  | 57  | 3.78  |   |
| 2212 | Yipf1          | 2.05 | 138 | 14.55 | 183 | 29.86 |   |
| 2213 | Brms1l         | 2.05 | 0   | 1.28  | 0   | 2.62  |   |
| 2214 | Elmod3         | 2.05 | 39  | 1.6   | 55  | 3.28  |   |
| 2215 | Ifnlr1         | 2.05 | 26  | 1.07  | 31  | 2.2   |   |
| 2216 | Pcdhga8        | 2.05 | 16  | 1.75  | 22  | 3.58  |   |
| 2217 | RGD1560755     | 2.05 | 39  | 4.5   | 55  | 9.23  |   |
| 2218 | Bmp2           | 2.05 | 391 | 27.62 | 557 | 56.57 |   |
| 2219 | Ehd3           | 2.05 | 21  | 2.11  | 34  | 4.32  |   |
| 2220 | Snrpn          | 2.05 | 4   | 4.66  | 5   | 9.53  |   |
| 2221 | Gtf2a1         | 2.04 | 218 | 9.13  | 308 | 18.66 |   |
| 2222 | Katnal1_1      | 2.04 | 0   | 4.51  | 1   | 9.22  |   |
| 2223 | Rhbdf2         | 2.04 | 50  | 2.62  | 63  | 5.36  |   |
| 2224 | Cog8           | 2.04 | 81  | 7.77  | 108 | 15.84 |   |
| 2225 | Dennd4b        | 2.04 | 103 | 4.32  | 135 | 8.8   |   |
| 2226 | Tmub1          | 2.03 | 28  | 4.37  | 37  | 8.89  |   |
| 2227 | AABR07000410.1 | 2.03 | 5   | 0.34  | 5   | 0.68  |   |
| 2228 | AABR07001899.1 | 2.03 | 87  | 0.39  | 120 | 0.79  |   |
| 2229 | Abcg2          | 2.03 | 14  | 0.91  | 15  | 1.85  |   |
| 2230 | Adgrb2         | 2.03 | 12  | 0.49  | 18  | 1     |   |
| 2231 | Atn1           | 2.03 | 0   | 0.35  | 0   | 0.71  |   |
| 2232 | Camk2n1        | 2.03 | 7   | 3.05  | 7   | 6.2   |   |
| 2233 | Chd1l          | 2.03 | 41  | 2.76  | 56  | 5.61  |   |
| 2234 | Clip4          | 2.03 | 14  | 0.48  | 24  | 0.97  |   |
| 2235 | Dcp2_3         | 2.03 | 0   | 0.96  | 0   | 1.95  |   |
| 2236 | Fam25a         | 2.03 | 7   | 3.11  | 9   | 6.34  |   |
| 2237 | Fmnl1          | 2.03 | 11  | 0.64  | 13  | 1.31  |   |
| 2238 | LOC100911365   | 2.03 | 0   | 1.42  | 0   | 2.88  |   |
| 2239 | Lppr5          | 2.03 | 15  | 0.44  | 17  | 0.9   |   |
| 2240 | Mmp17          | 2.03 | 5   | 0.36  | 8   | 0.72  |   |
| 2241 | Mrgbp          | 2.03 | 0   | 4.05  | 0   | 8.24  |   |
| 2242 | Pfn2           | 2.03 | 22  | 5.76  | 23  | 11.71 |   |
| 2243 | Phospho1       | 2.03 | 6   | 0.62  | 7   | 1.27  |   |
| 2244 | Rab36          | 2.03 | 18  | 1     | 34  | 2.03  |   |
| 2245 | Ror1           | 2.03 | 14  | 0.24  | 11  | 0.49  |   |
| 2246 | Ror2           | 2.03 | 27  | 1.26  | 51  | 2.57  |   |
| 2247 | Scn1a          | 2.03 | 11  | 0.1   | 8   | 0.21  |   |
| 2248 | Senp8          | 2.03 | 35  | 2.54  | 36  | 5.16  |   |
| 2249 | Slc6a4         | 2.03 | 5   | 0.38  | 14  | 0.77  |   |
| 2250 | Slmo1          | 2.03 | 24  | 0.95  | 24  | 1.94  |   |
| 2251 | Soga3          | 2.03 | 13  | 0.44  | 18  | 0.89  |   |
| 2252 | Tmco3          | 2.03 | 9   | 2.28  | 10  | 4.63  |   |
| 2253 | Tmem117        | 2.03 | 15  | 0.56  | 19  | 1.14  |   |
| 2254 | Tmem177        | 2.03 | 16  | 2.59  | 21  | 5.26  |   |
| 2255 | Ttc27          | 2.03 | 129 | 8.36  | 177 | 17.01 |   |
| 2256 | Vwa5b2         | 2.03 | 10  | 0.28  | 12  | 0.56  |   |
| 2257 | Zfp788         | 2.03 | 20  | 1.8   | 28  | 3.67  |   |
| 2258 | Zswim7         | 2.03 | 21  | 1.78  | 32  | 3.62  |   |
| 2259 | Apobr          | 2.03 | 5   | 0.29  | 7   | 0.59  |   |
| 2260 | Ptges3l1       | 2.03 | 10  | 0.78  | 7   | 1.58  |   |
| 2261 | Hacd2          | 2.03 | 236 | 27.03 | 307 | 54.9  |   |
| 2262 | Ctdspl         | 2.03 | 88  | 4.27  | 113 | 8.68  |   |
| 2263 | Ahi1           | 2.03 | 82  | 5     | 115 | 10.14 |   |
| 2264 | Samd11         | 2.03 | 137 | 15.11 | 178 | 30.66 |   |

Supplemental Table 2  
Vehicle versus FSH, 24 hours

|      | A              | B    | C   | D     | E   | F     | G |
|------|----------------|------|-----|-------|-----|-------|---|
| 2265 | Baiap2         | 2.03 | 107 | 5.74  | 153 | 11.65 |   |
| 2266 | LOC100910275   | 2.03 | 7   | 10.47 | 9   | 21.24 |   |
| 2267 | Armc7          | 2.03 | 105 | 4     | 130 | 8.1   |   |
| 2268 | Brca2          | 2.03 | 49  | 0.92  | 64  | 1.86  |   |
| 2269 | Mrpl44         | 2.03 | 36  | 5.33  | 47  | 10.8  |   |
| 2270 | Angel1         | 2.02 | 31  | 1.55  | 46  | 3.13  |   |
| 2271 | Sclt1          | 2.02 | 128 | 2.82  | 117 | 5.71  |   |
| 2272 | Iffo1          | 2.02 | 118 | 4.83  | 151 | 9.77  |   |
| 2273 | Them4          | 2.02 | 25  | 2.03  | 37  | 4.11  |   |
| 2274 | Rnf213         | 2.02 | 274 | 4.01  | 392 | 8.11  |   |
| 2275 | Pccb           | 2.02 | 129 | 14.18 | 180 | 28.63 |   |
| 2276 | Snx33          | 2.02 | 293 | 17.35 | 393 | 35.02 |   |
| 2277 | Clk4           | 2.02 | 91  | 6.46  | 104 | 13.03 |   |
| 2278 | Osgep          | 2.02 | 20  | 3.19  | 33  | 6.45  |   |
| 2279 | Zfp266         | 2.02 | 675 | 25.62 | 922 | 51.7  |   |
| 2280 | Chchd10        | 2.02 | 140 | 30.87 | 195 | 62.28 |   |
| 2281 | AABR07012047.1 | 2.02 | 34  | 2.3   | 47  | 4.63  |   |
| 2282 | Hbp1           | 2.01 | 321 | 23.86 | 481 | 48.04 |   |
| 2283 | RGD1306151     | 2.01 | 72  | 4.18  | 101 | 8.43  |   |
| 2284 | Ago4           | 2.01 | 18  | 0.87  | 30  | 1.74  |   |
| 2285 | Cxxc4          | 2.01 | 22  | 0.6   | 25  | 1.21  |   |
| 2286 | Fam117b        | 2.01 | 254 | 10.07 | 343 | 20.27 |   |
| 2287 | Plxnd1         | 2.01 | 51  | 1.59  | 65  | 3.2   |   |
| 2288 | Pnpo           | 2.01 | 13  | 1.58  | 21  | 3.18  |   |
| 2289 | RGD1311517     | 2.01 | 21  | 1.85  | 39  | 3.72  |   |
| 2290 | Rmdn1          | 2.01 | 56  | 1.6   | 69  | 3.22  |   |
| 2291 | Proser3        | 2.01 | 81  | 4.6   | 100 | 9.26  |   |
| 2292 | Sema4d         | 2.01 | 78  | 2.83  | 90  | 5.69  |   |
| 2293 | Scpep1         | 2.01 | 151 | 16.81 | 222 | 33.76 |   |
| 2294 | Glb1           | 2.01 | 399 | 25.4  | 498 | 51.01 |   |
| 2295 | Casp6          | 2.01 | 9   | 5.23  | 10  | 10.5  |   |
| 2296 | Cdkn2aipnl     | 2.01 | 166 | 23.08 | 237 | 46.35 |   |
| 2297 | Fam171a2       | 2.01 | 73  | 5.55  | 85  | 11.15 |   |
| 2298 | B4galt4        | 2.01 | 28  | 2.45  | 44  | 4.91  |   |
| 2299 | Cped1          | 2.01 | 151 | 4.13  | 212 | 8.29  |   |
| 2300 | Insig2         | 2.01 | 34  | 5.28  | 45  | 10.6  |   |
| 2301 | Ctps2          | 2.01 | 220 | 13.4  | 290 | 26.89 |   |
| 2302 | Sspn           | 2    | 90  | 5.54  | 113 | 11.11 |   |
| 2303 | Akap17b        | 2    | 47  | 1.4   | 60  | 2.8   |   |
| 2304 | LOC102552166   | 2    | 12  | 2.23  | 25  | 4.47  |   |
| 2305 | Fbxo22         | 2    | 60  | 8.98  | 69  | 17.98 |   |
| 2306 | Twf2           | 2    | 43  | 5.83  | 58  | 11.67 |   |
| 2307 | Mpnd           | 2    | 127 | 13.22 | 159 | 26.48 |   |
| 2308 | Ifi35          | 2    | 54  | 10.47 | 67  | 20.96 |   |
| 2309 | Wnt4           | 2    | 211 | 8.39  | 292 | 16.79 |   |
| 2310 | Tapbp          | 2    | 161 | 22.48 | 208 | 44.94 |   |
| 2311 | Ccdc142        | 2    | 0   | 0.92  | 0   | 1.84  |   |
| 2312 | Immp1l         | 2    | 30  | 3.16  | 42  | 6.32  |   |
| 2313 | Nudt1          | 2    | 9   | 2.31  | 15  | 4.62  |   |
| 2314 | AABR07001910.1 | 2    | 8   | 0.76  | 11  | 1.51  |   |
| 2315 | Dcaf8          | 2    | 377 | 17.14 | 470 | 34.25 |   |
| 2316 | Hemk1          | 2    | 10  | 1.14  | 18  | 2.27  |   |
| 2317 | LOC100910017   | 2    | 0   | 4.65  | 0   | 9.28  |   |
| 2318 | Med18          | 2    | 30  | 6.39  | 28  | 12.77 |   |

Supplemental Table 2  
Vehicle versus FSH, 24 hours

|      | A              | B    | C    | D      | E    | F       | G                          |
|------|----------------|------|------|--------|------|---------|----------------------------|
| 2319 | Naif1          | 2    | 16   | 1.31   | 23   | 2.62    |                            |
| 2320 | RGD1305420     | 2    | 8    | 0.53   | 11   | 1.06    |                            |
| 2321 | Rpl35a_1       | 2    | 0    | 5.73   | 0    | 11.44   |                            |
| 2322 | Vamp5          | 2    | 17   | 13.03  | 26   | 26.03   |                            |
| 2323 | Wars2          | 2    | 41   | 2.02   | 37   | 4.03    |                            |
| 2324 | Fam3a          | 2    | 127  | 12.04  | 161  | 24.04   |                            |
| 2325 | Fam134a        | 2    | 160  | 14.18  | 222  | 28.3    |                            |
| 2326 | LOC100910957   | 1.99 | 24   | 3.39   | 38   | 6.75    | Genes not regulated by FSH |
| 2327 | Zmym6          | 1.99 | 79   | 2.49   | 102  | 4.95    |                            |
| 2328 | Gpx4           | 1.99 | 235  | 74.6   | 381  | 148.45  |                            |
| 2329 | Mut            | 1.99 | 47   | 3.35   | 74   | 6.67    |                            |
| 2330 | Nfkbib         | 1.99 | 29   | 3.39   | 28   | 6.73    |                            |
| 2331 | Pex5           | 1.99 | 0    | 2.39   | 0    | 4.75    |                            |
| 2332 | Fam110b        | 1.99 | 30   | 4.57   | 41   | 9.08    |                            |
| 2333 | Isoc2b         | 1.99 | 53   | 7.16   | 81   | 14.22   |                            |
| 2334 | Qsox2          | 1.99 | 232  | 11.29  | 302  | 22.42   |                            |
| 2335 | Tpra1          | 1.99 | 134  | 13.44  | 169  | 26.7    |                            |
| 2336 | Kctd1          | 1.99 | 116  | 4.36   | 150  | 8.65    |                            |
| 2337 | Zranb3         | 1.98 | 275  | 9.05   | 401  | 17.94   |                            |
| 2338 | LOC100361537   | 1.98 | 154  | 18.1   | 201  | 35.88   |                            |
| 2339 | Capn5          | 1.98 | 155  | 7.2    | 201  | 14.28   |                            |
| 2340 | Gpc2           | 1.98 | 17   | 1.05   | 27   | 2.08    |                            |
| 2341 | AABR07050391.2 | 1.98 | 0    | 4.55   | 0    | 9.01    |                            |
| 2342 | Ethe1          | 1.98 | 62   | 10.68  | 77   | 21.15   |                            |
| 2343 | LOC100910370   | 1.98 | 0    | 7.08   | 0    | 14.03   |                            |
| 2344 | Psmb10         | 1.98 | 56   | 13.76  | 77   | 27.26   |                            |
| 2345 | AABR07054189.1 | 1.98 | 3    | 5.02   | 4    | 9.95    |                            |
| 2346 | LOC361346      | 1.98 | 98   | 4.84   | 125  | 9.58    |                            |
| 2347 | Taf9b          | 1.98 | 12   | 0.83   | 18   | 1.64    |                            |
| 2348 | Rnf130         | 1.98 | 121  | 16.31  | 138  | 32.33   |                            |
| 2349 | Trim24         | 1.98 | 188  | 7.69   | 250  | 15.23   |                            |
| 2350 | RT1-CE16       | 1.98 | 21   | 10.75  | 26   | 21.28   |                            |
| 2351 | Rpl18a         | 1.98 | 1975 | 760.29 | 2706 | 1504.06 |                            |
| 2352 | Tsen34_1       | 1.98 | 0    | 9.55   | 0    | 18.89   |                            |
| 2353 | Stk11ip        | 1.98 | 126  | 5.96   | 163  | 11.79   |                            |
| 2354 | Chchd5         | 1.98 | 31   | 4.13   | 36   | 8.15    |                            |
| 2355 | Zfp36l1        | 1.98 | 145  | 12.7   | 196  | 25.08   |                            |
| 2356 | Reep3          | 1.98 | 299  | 12.96  | 404  | 25.61   |                            |
| 2357 | Mboat2         | 1.97 | 76   | 3.42   | 93   | 6.76    |                            |
| 2358 | Trappc1        | 1.97 | 86   | 21.57  | 115  | 42.6    |                            |
| 2359 | RGD1310127     | 1.97 | 63   | 8.98   | 84   | 17.73   |                            |
| 2360 | Kcnk2          | 1.97 | 54   | 2.88   | 89   | 5.67    |                            |
| 2361 | Tdrkh          | 1.97 | 15   | 1.13   | 20   | 2.23    |                            |
| 2362 | Zbtb9          | 1.97 | 42   | 3.75   | 57   | 7.41    |                            |
| 2363 | Smcr8          | 1.97 | 130  | 8.34   | 169  | 16.43   |                            |
| 2364 | Ankrd10        | 1.97 | 359  | 15.17  | 373  | 29.88   |                            |
| 2365 | RGD1302996     | 1.97 | 28   | 5.68   | 36   | 11.18   |                            |
| 2366 | Parp11         | 1.97 | 80   | 4.53   | 83   | 8.91    |                            |
| 2367 | Trim23         | 1.97 | 57   | 3.54   | 86   | 6.98    |                            |
| 2368 | Mthfs          | 1.97 | 29   | 1.54   | 29   | 3.03    |                            |
| 2369 | Osbpl1a        | 1.97 | 108  | 5.58   | 158  | 10.96   |                            |
| 2370 | Zfp229         | 1.97 | 20   | 1.85   | 24   | 3.65    |                            |
| 2371 | Lrp8           | 1.97 | 479  | 12.78  | 598  | 25.13   |                            |

Supplemental Table 2  
Vehicle versus FSH, 24 hours

|      | A              | B    | C    | D     | E    | F      | G |
|------|----------------|------|------|-------|------|--------|---|
| 2372 | Coasy          | 1.96 | 65   | 6.63  | 100  | 13.03  |   |
| 2373 | Clasp2         | 1.96 | 417  | 13.64 | 584  | 26.79  |   |
| 2374 | St3gal4        | 1.96 | 1888 | 179.1 | 2552 | 351.69 |   |
| 2375 | Lmbr1l         | 1.96 | 153  | 10.68 | 189  | 20.94  |   |
| 2376 | Msh3           | 1.96 | 65   | 2.6   | 95   | 5.1    |   |
| 2377 | Sppl3          | 1.96 | 465  | 27.41 | 537  | 53.73  |   |
| 2378 | Atp1a1         | 1.96 | 1235 | 83.53 | 1664 | 163.71 |   |
| 2379 | Xylt2          | 1.96 | 131  | 8.09  | 154  | 15.85  |   |
| 2380 | Zfp629         | 1.96 | 549  | 6.14  | 577  | 12.03  |   |
| 2381 | Ypel3          | 1.96 | 34   | 6.08  | 38   | 11.9   |   |
| 2382 | Zfp94_1        | 1.96 | 169  | 10.28 | 224  | 20.12  |   |
| 2383 | Tango2         | 1.96 | 149  | 7.66  | 180  | 15     |   |
| 2384 | Nxn            | 1.96 | 161  | 13.87 | 167  | 27.15  |   |
| 2385 | Ccp1           | 1.96 | 138  | 7.72  | 174  | 15.1   |   |
| 2386 | Fastkd3        | 1.96 | 42   | 2.87  | 49   | 5.6    |   |
| 2387 | Slc9a1         | 1.95 | 181  | 6.22  | 221  | 12.17  |   |
| 2388 | Klc4           | 1.95 | 75   | 5.43  | 89   | 10.62  |   |
| 2389 | Bivm           | 1.95 | 59   | 4.79  | 70   | 9.36   |   |
| 2390 | Bmyc           | 1.95 | 29   | 9.51  | 39   | 18.58  |   |
| 2391 | Adprh          | 1.95 | 97   | 14.74 | 130  | 28.8   |   |
| 2392 | Trappc12       | 1.95 | 136  | 8.76  | 169  | 17.1   |   |
| 2393 | Hs2st1         | 1.95 | 173  | 8.29  | 213  | 16.19  |   |
| 2394 | Asb7           | 1.95 | 97   | 3.72  | 115  | 7.25   |   |
| 2395 | Dmap1          | 1.95 | 44   | 6.05  | 53   | 11.81  |   |
| 2396 | Pknox2         | 1.95 | 314  | 13.71 | 436  | 26.73  |   |
| 2397 | Chst14         | 1.95 | 85   | 10.29 | 114  | 20.06  |   |
| 2398 | Spint2         | 1.95 | 378  | 57.29 | 495  | 111.58 |   |
| 2399 | Dnajc16        | 1.95 | 66   | 5.04  | 84   | 9.8    |   |
| 2400 | Tvp23b         | 1.94 | 67   | 9.8   | 97   | 19.07  |   |
| 2401 | Orc3           | 1.94 | 135  | 6.75  | 157  | 13.13  |   |
| 2402 | Mxi1           | 1.94 | 108  | 6.01  | 117  | 11.68  |   |
| 2403 | Adgrl1         | 1.94 | 344  | 12.11 | 422  | 23.51  |   |
| 2404 | Sec14l1        | 1.94 | 431  | 21.48 | 572  | 41.66  |   |
| 2405 | Cluh           | 1.94 | 482  | 25.51 | 614  | 49.46  |   |
| 2406 | AABR07070810.1 | 1.94 | 0    | 1.5   | 0    | 2.91   |   |
| 2407 | AC103179.2     | 1.94 | 6    | 0.63  | 8    | 1.21   |   |
| 2408 | AC129162.1     | 1.94 | 11   | 1.38  | 27   | 2.67   |   |
| 2409 | Asic1          | 1.94 | 3    | 0.18  | 3    | 0.34   |   |
| 2410 | Cd93           | 1.94 | 3    | 0.16  | 4    | 0.3    |   |
| 2411 | Grhpr          | 1.94 | 15   | 2.38  | 28   | 4.61   |   |
| 2412 | Hivep3         | 1.94 | 3    | 0.07  | 6    | 0.13   |   |
| 2413 | LOC360479      | 1.94 | 6    | 0.27  | 11   | 0.53   |   |
| 2414 | Nfkbid         | 1.94 | 6    | 0.82  | 8    | 1.59   |   |
| 2415 | 6720489N17Rik  | 1.94 | 16   | 9.49  | 18   | 18.39  |   |
| 2416 | AABR07010468.1 | 1.94 | 8    | 1.07  | 22   | 2.07   |   |
| 2417 | AABR07032751.1 | 1.94 | 7    | 3.08  | 18   | 5.96   |   |
| 2418 | AABR07053136.1 | 1.94 | 3    | 2.37  | 4    | 4.6    |   |
| 2419 | AC098462.2     | 1.94 | 0    | 1.2   | 0    | 2.32   |   |
| 2420 | AC113925.2     | 1.94 | 1    | 1.2   | 1    | 2.32   |   |
| 2421 | Armc9          | 1.94 | 157  | 6.88  | 242  | 13.33  |   |
| 2422 | Atxn7l2        | 1.94 | 35   | 3.11  | 50   | 6.02   |   |
| 2423 | Chst3          | 1.94 | 3    | 0.13  | 4    | 0.26   |   |
| 2424 | Dapp1          | 1.94 | 11   | 0.49  | 10   | 0.95   |   |
| 2425 | Enox2          | 1.94 | 8    | 0.25  | 12   | 0.49   |   |

Supplemental Table 2  
Vehicle versus FSH, 24 hours

|      | A               | B    | C   | D     | E   | F     | G |
|------|-----------------|------|-----|-------|-----|-------|---|
| 2426 | ENSRNOG00000042 | 1.94 | 5   | 0.49  | 5   | 0.96  |   |
| 2427 | Fahd1           | 1.94 | 21  | 3.64  | 28  | 7.05  |   |
| 2428 | Gramd1c_2       | 1.94 | 2   | 0.79  | 3   | 1.53  |   |
| 2429 | Gyltl1b         | 1.94 | 19  | 1.56  | 21  | 3.02  |   |
| 2430 | LOC100910729    | 1.94 | 2   | 0.28  | 4   | 0.55  |   |
| 2431 | LOC100911374    | 1.94 | 0   | 0.65  | 1   | 1.26  |   |
| 2432 | LOC102550734    | 1.94 | 0   | 1.99  | 0   | 3.86  |   |
| 2433 | Maf             | 1.94 | 3   | 0.38  | 4   | 0.74  |   |
| 2434 | Mbp             | 1.94 | 18  | 0.22  | 13  | 0.43  |   |
| 2435 | Mdfi            | 1.94 | 6   | 0.46  | 4   | 0.9   |   |
| 2436 | MGC116202       | 1.94 | 13  | 0.76  | 12  | 1.46  |   |
| 2437 | Mrpl34          | 1.94 | 28  | 11.78 | 36  | 22.83 |   |
| 2438 | Nudt6           | 1.94 | 12  | 0.7   | 15  | 1.36  |   |
| 2439 | Pigu            | 1.94 | 194 | 9.8   | 233 | 18.99 |   |
| 2440 | Plcx3           | 1.94 | 12  | 0.4   | 15  | 0.77  |   |
| 2441 | Plod1           | 1.94 | 68  | 5.32  | 89  | 10.31 |   |
| 2442 | RGD1564171      | 1.94 | 13  | 2.35  | 17  | 4.55  |   |
| 2443 | Scube3          | 1.94 | 23  | 0.25  | 28  | 0.49  |   |
| 2444 | Serp2           | 1.94 | 19  | 0.77  | 13  | 1.48  |   |
| 2445 | Six4            | 1.94 | 35  | 1.38  | 49  | 2.67  |   |
| 2446 | Slc16a3         | 1.94 | 8   | 0.35  | 8   | 0.68  |   |
| 2447 | Slc35e1         | 1.94 | 91  | 15.19 | 109 | 29.44 |   |
| 2448 | Slc6a17         | 1.94 | 5   | 0.12  | 6   | 0.24  |   |
| 2449 | Slfn2           | 1.94 | 6   | 0.84  | 13  | 1.63  |   |
| 2450 | SNORD89         | 1.94 | 6   | 13    | 8   | 25.19 |   |
| 2451 | Vamp7           | 1.94 | 62  | 12.85 | 79  | 24.89 |   |
| 2452 | Zfp575          | 1.94 | 3   | 0.66  | 4   | 1.27  |   |
| 2453 | AABR07054968.1  | 1.94 | 0   | 0.51  | 0   | 0.99  |   |
| 2454 | AC131360.1      | 1.94 | 3   | 0.4   | 5   | 0.78  |   |
| 2455 | Acy3            | 1.94 | 37  | 5.06  | 42  | 9.81  |   |
| 2456 | Cacna1c         | 1.94 | 9   | 0.09  | 8   | 0.18  |   |
| 2457 | Dyx1c1          | 1.94 | 8   | 0.37  | 8   | 0.73  |   |
| 2458 | Erc5            | 1.94 | 72  | 3.11  | 98  | 6.02  |   |
| 2459 | Fam151b         | 1.94 | 28  | 1.64  | 36  | 3.18  |   |
| 2460 | Fam221a         | 1.94 | 19  | 0.99  | 20  | 1.93  |   |
| 2461 | Gpr108          | 1.94 | 110 | 13.06 | 147 | 25.31 |   |
| 2462 | Klhdc4_2        | 1.94 | 3   | 2.33  | 4   | 4.51  |   |
| 2463 | LOC102547118    | 1.94 | 3   | 0.43  | 5   | 0.83  |   |
| 2464 | Lrpap1          | 1.94 | 335 | 26.46 | 450 | 51.27 |   |
| 2465 | Lrrc39          | 1.94 | 6   | 0.26  | 3   | 0.5   |   |
| 2466 | Map10           | 1.94 | 3   | 0.27  | 4   | 0.52  |   |
| 2467 | Myh7b           | 1.94 | 10  | 0.12  | 8   | 0.24  |   |
| 2468 | Pcdhb2          | 1.94 | 3   | 0.31  | 4   | 0.6   |   |
| 2469 | Pcdhga1         | 1.94 | 6   | 0.62  | 8   | 1.2   |   |
| 2470 | RGD1309779      | 1.94 | 2   | 1.21  | 1   | 2.34  |   |
| 2471 | Rn60_20_0046.5  | 1.94 | 3   | 1.17  | 4   | 2.27  |   |
| 2472 | Rom1            | 1.94 | 3   | 0.48  | 4   | 0.94  |   |
| 2473 | Sec22a          | 1.94 | 77  | 5.49  | 80  | 10.63 |   |
| 2474 | Tap1            | 1.94 | 38  | 2.49  | 51  | 4.82  |   |
| 2475 | Zfp563          | 1.94 | 9   | 1.67  | 12  | 3.23  |   |
| 2476 | Zfp599          | 1.94 | 34  | 0.31  | 32  | 0.6   |   |
| 2477 | Tmem159         | 1.93 | 183 | 19.35 | 205 | 37.4  |   |
| 2478 | Tpst1           | 1.93 | 85  | 8.62  | 115 | 16.64 |   |
| 2479 | Fam127b         | 1.93 | 123 | 25.18 | 166 | 48.59 |   |

Supplemental Table 2  
Vehicle versus FSH, 24 hours

|      | A              | B    | C    | D      | E    | F      | G |
|------|----------------|------|------|--------|------|--------|---|
| 2480 | Pla2g16        | 1.93 | 60   | 17.78  | 88   | 34.29  |   |
| 2481 | Fbxw4          | 1.93 | 132  | 7.11   | 148  | 13.71  |   |
| 2482 | Ifitm2         | 1.93 | 242  | 92.07  | 314  | 177.48 |   |
| 2483 | Kcne2          | 1.93 | 180  | 19.16  | 229  | 36.9   |   |
| 2484 | Laptm4b        | 1.93 | 504  | 58.48  | 634  | 112.64 |   |
| 2485 | Senp7          | 1.92 | 129  | 3.93   | 167  | 7.57   |   |
| 2486 | Marf1          | 1.92 | 0    | 5.56   | 0    | 10.69  |   |
| 2487 | Susd4          | 1.92 | 55   | 2.87   | 82   | 5.51   |   |
| 2488 | Idua           | 1.92 | 226  | 19.4   | 306  | 37.3   |   |
| 2489 | Osbpl9         | 1.92 | 273  | 17.81  | 347  | 34.23  |   |
| 2490 | Tmem69         | 1.92 | 32   | 3.98   | 42   | 7.64   |   |
| 2491 | Fgfr1          | 1.92 | 335  | 20.29  | 408  | 38.89  |   |
| 2492 | AABR07027910.1 | 1.92 | 22   | 2.88   | 29   | 5.51   |   |
| 2493 | Elac2          | 1.91 | 115  | 9.13   | 158  | 17.49  |   |
| 2494 | Bex2           | 1.91 | 40   | 13.18  | 52   | 25.23  |   |
| 2495 | Bcap29         | 1.91 | 45   | 5.52   | 58   | 10.55  |   |
| 2496 | Fam173b        | 1.91 | 38   | 3.44   | 60   | 6.57   |   |
| 2497 | Hint2          | 1.91 | 48   | 16.16  | 61   | 30.89  |   |
| 2498 | Pex14          | 1.91 | 120  | 9.56   | 149  | 18.27  |   |
| 2499 | Crtap          | 1.91 | 129  | 21.4   | 184  | 40.89  |   |
| 2500 | Dhfr           | 1.91 | 38   | 1.86   | 52   | 3.56   |   |
| 2501 | Adgra3         | 1.91 | 224  | 11.41  | 297  | 21.78  |   |
| 2502 | Ypel5          | 1.91 | 191  | 15.45  | 248  | 29.47  |   |
| 2503 | Tprn           | 1.91 | 24   | 1.46   | 24   | 2.78   |   |
| 2504 | C1galt1c1      | 1.91 | 53   | 9.11   | 71   | 17.37  |   |
| 2505 | RGD1565222     | 1.91 | 23   | 1.36   | 37   | 2.59   |   |
| 2506 | Acad8          | 1.91 | 46   | 3.23   | 61   | 6.15   |   |
| 2507 | Capn10         | 1.91 | 108  | 8.78   | 129  | 16.75  |   |
| 2508 | Zfp866_1       | 1.9  | 29   | 4.64   | 38   | 8.84   |   |
| 2509 | Ccn1           | 1.9  | 368  | 22.75  | 541  | 43.32  |   |
| 2510 | Rmnd5b_2       | 1.9  | 2    | 13.24  | 1    | 25.21  |   |
| 2511 | AC127920.1     | 1.9  | 19   | 9.32   | 16   | 17.73  |   |
| 2512 | Fam35a         | 1.9  | 62   | 1.92   | 54   | 3.64   |   |
| 2513 | Id4            | 1.9  | 16   | 1.99   | 17   | 3.79   |   |
| 2514 | Abca16         | 1.9  | 49   | 0.65   | 54   | 1.24   |   |
| 2515 | Pdik1l         | 1.9  | 51   | 2.16   | 58   | 4.11   |   |
| 2516 | RGD1310429     | 1.9  | 23   | 2.75   | 29   | 5.22   |   |
| 2517 | Spata2         | 1.9  | 70   | 5.43   | 77   | 10.31  |   |
| 2518 | Tmem17         | 1.9  | 26   | 2.89   | 36   | 5.5    |   |
| 2519 | Med25          | 1.9  | 278  | 26.13  | 358  | 49.63  |   |
| 2520 | Anp32e         | 1.9  | 324  | 22.62  | 391  | 42.91  |   |
| 2521 | RGD1311739     | 1.9  | 60   | 5.94   | 71   | 11.27  |   |
| 2522 | Mxd4           | 1.9  | 266  | 13.69  | 326  | 25.96  |   |
| 2523 | Dars2          | 1.9  | 28   | 2.51   | 41   | 4.76   |   |
| 2524 | Tmem38a        | 1.9  | 28   | 2.65   | 35   | 5.02   |   |
| 2525 | Nipsnap1       | 1.9  | 120  | 9.13   | 170  | 17.3   |   |
| 2526 | Igfbp5         | 1.9  | 3923 | 165.83 | 5094 | 314.29 |   |
| 2527 | Galnt11        | 1.89 | 148  | 9.53   | 165  | 18.06  |   |
| 2528 | Asf1a          | 1.89 | 16   | 2.95   | 24   | 5.59   |   |
| 2529 | Vipas39        | 1.89 | 144  | 11.45  | 196  | 21.68  |   |
| 2530 | Sdf4           | 1.89 | 370  | 53.47  | 469  | 101.17 |   |
| 2531 | Bcl11a         | 1.89 | 139  | 4.09   | 205  | 7.74   |   |
| 2532 | AABR07035428.1 | 1.89 | 119  | 3.49   | 92   | 6.6    |   |
| 2533 | Mtrf1          | 1.89 | 26   | 1.28   | 24   | 2.42   |   |

Supplemental Table 2  
Vehicle versus FSH, 24 hours

|      | A              | B    | C    | D      | E    | F       | G |
|------|----------------|------|------|--------|------|---------|---|
| 2534 | Sts            | 1.89 | 10   | 0.97   | 15   | 1.82    |   |
| 2535 | Cars2          | 1.89 | 69   | 2.76   | 77   | 5.22    |   |
| 2536 | Mterfd2        | 1.89 | 36   | 5.75   | 42   | 10.87   |   |
| 2537 | Parg           | 1.89 | 143  | 5.64   | 182  | 10.66   |   |
| 2538 | Pgap3          | 1.89 | 24   | 2.06   | 30   | 3.9     |   |
| 2539 | Ppap2c         | 1.89 | 26   | 3.1    | 33   | 5.85    |   |
| 2540 | Adarb1         | 1.89 | 58   | 1.49   | 73   | 2.82    |   |
| 2541 | Igsf8          | 1.89 | 52   | 5.73   | 69   | 10.82   |   |
| 2542 | Sfi1           | 1.89 | 75   | 2.1    | 100  | 3.96    |   |
| 2543 | AY172581.24    | 1.89 | 5950 | 962.72 | 7703 | 1818.41 |   |
| 2544 | Sall2          | 1.89 | 110  | 4.71   | 138  | 8.88    |   |
| 2545 | Isca1          | 1.89 | 166  | 19.37  | 202  | 36.56   |   |
| 2546 | Apex1          | 1.89 | 116  | 22.28  | 151  | 42.03   |   |
| 2547 | Prr15          | 1.89 | 117  | 20.07  | 151  | 37.87   |   |
| 2548 | Reck           | 1.89 | 126  | 6.16   | 161  | 11.61   |   |
| 2549 | Fbxl6          | 1.89 | 58   | 6.15   | 68   | 11.6    |   |
| 2550 | Ppt1           | 1.89 | 109  | 16.38  | 134  | 30.88   |   |
| 2551 | Coa7           | 1.88 | 40   | 2.42   | 41   | 4.56    |   |
| 2552 | Hist1h2bg      | 1.88 | 9    | 7.09   | 16   | 13.35   |   |
| 2553 | AY172581.9     | 1.88 | 1608 | 422.91 | 2074 | 796.32  |   |
| 2554 | Slc25a12       | 1.88 | 133  | 9.73   | 157  | 18.3    |   |
| 2555 | LOC100362658   | 1.88 | 18   | 1.6    | 24   | 3       |   |
| 2556 | Ubox5          | 1.88 | 92   | 3.47   | 92   | 6.53    |   |
| 2557 | Zfp39          | 1.88 | 1609 | 1.03   | 584  | 1.94    |   |
| 2558 | AABR07016056.1 | 1.88 | 9    | 10.58  | 12   | 19.9    |   |
| 2559 | Ccdc92         | 1.88 | 21   | 2.17   | 25   | 4.08    |   |
| 2560 | Npr2           | 1.88 | 270  | 14.63  | 318  | 27.51   |   |
| 2561 | Kat2a          | 1.88 | 126  | 9.45   | 163  | 17.75   |   |
| 2562 | Atp6v0e2       | 1.88 | 90   | 25.73  | 119  | 48.3    |   |
| 2563 | Tmem229b       | 1.88 | 31   | 1.59   | 33   | 2.98    |   |
| 2564 | Lrp3           | 1.88 | 22   | 1.54   | 38   | 2.88    |   |
| 2565 | RGD1563349     | 1.88 | 119  | 7.46   | 136  | 13.98   |   |
| 2566 | Mpdu1          | 1.87 | 30   | 12.1   | 43   | 22.68   |   |
| 2567 | Pcyox1         | 1.87 | 371  | 41.19  | 473  | 77.22   |   |
| 2568 | Ift80          | 1.87 | 55   | 2.4    | 71   | 4.49    |   |
| 2569 | Mt2A           | 1.87 | 23   | 38.48  | 26   | 72.03   |   |
| 2570 | Rassf4         | 1.87 | 92   | 8.99   | 125  | 16.81   |   |
| 2571 | Npc1           | 1.87 | 192  | 9.41   | 244  | 17.61   |   |
| 2572 | AABR07036732.1 | 1.87 | 11   | 0.3    | 12   | 0.56    |   |
| 2573 | Ppp1r35        | 1.87 | 0    | 1.47   | 0    | 2.74    |   |
| 2574 | Adam22         | 1.87 | 11   | 0.75   | 21   | 1.4     |   |
| 2575 | B9d1           | 1.87 | 0    | 2.24   | 0    | 4.19    |   |
| 2576 | Casq1          | 1.87 | 10   | 0.95   | 18   | 1.77    |   |
| 2577 | Ccdc157        | 1.87 | 26   | 1.18   | 35   | 2.21    |   |
| 2578 | Ccdc17         | 1.87 | 12   | 0.79   | 14   | 1.48    |   |
| 2579 | Fam169a        | 1.87 | 36   | 1.75   | 22   | 3.27    |   |
| 2580 | LOC100910531   | 1.87 | 20   | 0.66   | 24   | 1.22    |   |
| 2581 | Ncoa7          | 1.87 | 107  | 4.19   | 157  | 7.82    |   |
| 2582 | Ogfod2         | 1.87 | 20   | 2.12   | 19   | 3.96    |   |
| 2583 | Pcdh17         | 1.87 | 13   | 0.37   | 11   | 0.7     |   |
| 2584 | Phf19          | 1.87 | 15   | 0.92   | 19   | 1.72    |   |
| 2585 | Rn60_X_0652.2  | 1.87 | 7    | 2.64   | 9    | 4.93    |   |
| 2586 | Swsap1         | 1.87 | 14   | 1.5    | 18   | 2.8     |   |
| 2587 | Wdr83          | 1.87 | 29   | 4.44   | 36   | 8.29    |   |



Supplemental Table 2  
Vehicle versus FSH, 24 hours

|      | A              | B    | C   | D      | E   | F      | G |
|------|----------------|------|-----|--------|-----|--------|---|
| 2588 | Zfp867         | 1.87 | 8   | 1.27   | 9   | 2.37   |   |
| 2589 | Zfp954         | 1.87 | 14  | 1.77   | 19  | 3.3    |   |
| 2590 | Cntf           | 1.87 | 9   | 1.59   | 11  | 2.98   |   |
| 2591 | Csf2ra         | 1.87 | 11  | 1.25   | 12  | 2.34   |   |
| 2592 | Kiz            | 1.87 | 26  | 0.74   | 42  | 1.39   |   |
| 2593 | Wdr41          | 1.87 | 55  | 3.39   | 62  | 6.34   |   |
| 2594 | Smad3          | 1.87 | 610 | 22.41  | 711 | 41.84  |   |
| 2595 | Fam49b         | 1.86 | 266 | 29.12  | 334 | 54.29  |   |
| 2596 | Ppp2r3b        | 1.86 | 62  | 5.03   | 70  | 9.37   |   |
| 2597 | Zfp955a        | 1.86 | 39  | 2.37   | 50  | 4.42   |   |
| 2598 | Ly6e           | 1.86 | 304 | 35.21  | 386 | 65.57  |   |
| 2599 | Cul9           | 1.86 | 130 | 3.07   | 163 | 5.72   |   |
| 2600 | Letmd1         | 1.86 | 87  | 5.81   | 88  | 10.82  |   |
| 2601 | Mavs           | 1.86 | 73  | 5.3    | 103 | 9.87   |   |
| 2602 | Tln2           | 1.86 | 41  | 1.01   | 65  | 1.88   |   |
| 2603 | Cul7           | 1.86 | 133 | 8.52   | 159 | 15.85  |   |
| 2604 | Impdh1         | 1.86 | 206 | 18.19  | 271 | 33.86  |   |
| 2605 | Tbc1d31        | 1.86 | 49  | 1.67   | 47  | 3.11   |   |
| 2606 | AABR07035273.1 | 1.86 | 29  | 1.16   | 45  | 2.15   |   |
| 2607 | Ldb1           | 1.86 | 481 | 41.68  | 577 | 77.53  |   |
| 2608 | Hsdl2          | 1.86 | 54  | 5.34   | 70  | 9.92   |   |
| 2609 | AC118147.2     | 1.86 | 29  | 1.09   | 30  | 2.02   |   |
| 2610 | Hmgn3          | 1.86 | 48  | 3.2    | 43  | 5.94   |   |
| 2611 | Oma1           | 1.86 | 23  | 2.44   | 35  | 4.53   |   |
| 2612 | Thap3          | 1.86 | 39  | 3.74   | 40  | 6.95   |   |
| 2613 | LOC100910472   | 1.86 | 9   | 4.15   | 10  | 7.71   |   |
| 2614 | Ccni           | 1.85 | 608 | 51.96  | 752 | 96.38  |   |
| 2615 | Tcf4           | 1.85 | 327 | 11.16  | 413 | 20.71  |   |
| 2616 | Pnkd           | 1.85 | 85  | 4.91   | 112 | 9.1    |   |
| 2617 | AABR07002768.1 | 1.85 | 22  | 2.32   | 30  | 4.3    |   |
| 2618 | Hps3           | 1.85 | 29  | 1.86   | 40  | 3.44   |   |
| 2619 | Loh12cr1       | 1.85 | 58  | 3.98   | 54  | 7.37   |   |
| 2620 | Bace2          | 1.85 | 219 | 21.97  | 310 | 40.73  |   |
| 2621 | Klhl25         | 1.85 | 76  | 5.25   | 103 | 9.73   |   |
| 2622 | Ak1            | 1.85 | 82  | 9.96   | 113 | 18.44  |   |
| 2623 | Tecr           | 1.85 | 480 | 135.02 | 705 | 249.73 |   |
| 2624 | AABR07071814.2 | 1.85 | 11  | 1.95   | 14  | 3.6    |   |
| 2625 | Glyctk         | 1.85 | 13  | 1.39   | 16  | 2.57   |   |
| 2626 | Gtpbp10        | 1.85 | 19  | 1.66   | 21  | 3.07   |   |
| 2627 | Mmaa           | 1.85 | 18  | 0.94   | 25  | 1.74   |   |
| 2628 | SNORD49_2      | 1.85 | 22  | 76.13  | 28  | 140.8  |   |
| 2629 | AC117925.4     | 1.85 | 0   | 2.54   | 0   | 4.71   |   |
| 2630 | Fmo5           | 1.85 | 44  | 3.67   | 54  | 6.79   |   |
| 2631 | Rabggta        | 1.85 | 95  | 6.99   | 105 | 12.93  |   |
| 2632 | Zbtb26         | 1.85 | 60  | 2.47   | 47  | 4.57   |   |
| 2633 | Hey2           | 1.85 | 12  | 1.03   | 14  | 1.9    |   |
| 2634 | Nt5c3a         | 1.85 | 80  | 5.44   | 88  | 10.06  |   |
| 2635 | Thumpd2        | 1.85 | 84  | 4.11   | 94  | 7.6    |   |
| 2636 | Zbtb6          | 1.85 | 34  | 3.41   | 42  | 6.31   |   |
| 2637 | Pqlc1          | 1.85 | 360 | 37.85  | 420 | 69.96  |   |
| 2638 | Ikbkb          | 1.85 | 139 | 5.2    | 130 | 9.59   |   |
| 2639 | Entpd6         | 1.85 | 46  | 3.69   | 56  | 6.81   |   |
| 2640 | Plscr3         | 1.84 | 149 | 20.12  | 180 | 37.12  |   |
| 2641 | Cab39l         | 1.84 | 130 | 6.6    | 160 | 12.18  |   |

Supplemental Table 2  
Vehicle versus FSH, 24 hours

|      | A              | B    | C    | D      | E    | F      | G |
|------|----------------|------|------|--------|------|--------|---|
| 2642 | Med9           | 1.84 | 50   | 3.44   | 50   | 6.35   |   |
| 2643 | Bcl6           | 1.84 | 111  | 6.84   | 139  | 12.61  |   |
| 2644 | Top1           | 1.84 | 255  | 28.65  | 396  | 52.81  |   |
| 2645 | Ppif           | 1.84 | 51   | 6.9    | 65   | 12.71  |   |
| 2646 | Itgb5          | 1.84 | 688  | 60.93  | 769  | 112.28 |   |
| 2647 | Ing4           | 1.84 | 161  | 20.54  | 184  | 37.82  |   |
| 2648 | Zfp874b        | 1.84 | 29   | 2.34   | 38   | 4.3    |   |
| 2649 | AABR07002008.1 | 1.84 | 15   | 1.48   | 20   | 2.72   |   |
| 2650 | Lgr4           | 1.84 | 168  | 9.61   | 212  | 17.69  |   |
| 2651 | LOC681282      | 1.84 | 20   | 5.59   | 23   | 10.28  |   |
| 2652 | Mlh3           | 1.84 | 44   | 1.36   | 50   | 2.5    |   |
| 2653 | RGD1563941     | 1.84 | 15   | 2.45   | 19   | 4.51   |   |
| 2654 | Btbd1          | 1.84 | 330  | 19.33  | 358  | 35.56  |   |
| 2655 | LOC100360679   | 1.84 | 37   | 255.6  | 40   | 469.62 |   |
| 2656 | Sorbs3         | 1.84 | 187  | 16.02  | 244  | 29.42  |   |
| 2657 | AABR07012475.2 | 1.84 | 16   | 1.44   | 22   | 2.65   |   |
| 2658 | Dennd6b        | 1.84 | 32   | 1.78   | 37   | 3.26   |   |
| 2659 | Fam58b         | 1.84 | 19   | 4.07   | 24   | 7.47   |   |
| 2660 | RGD1307830     | 1.84 | 23   | 3.52   | 34   | 6.47   |   |
| 2661 | Slc35a5        | 1.84 | 69   | 6.83   | 94   | 12.54  |   |
| 2662 | Snx14          | 1.83 | 120  | 7.08   | 148  | 13     |   |
| 2663 | RT1-A2         | 1.83 | 43   | 11.93  | 51   | 21.88  |   |
| 2664 | Glrx5          | 1.83 | 80   | 7.07   | 84   | 12.97  |   |
| 2665 | Cdk2ap2        | 1.83 | 60   | 14.49  | 78   | 26.58  |   |
| 2666 | Wbp11_2        | 1.83 | 0    | 4.22   | 0    | 7.73   |   |
| 2667 | Cant1          | 1.83 | 140  | 12.13  | 169  | 22.24  |   |
| 2668 | Urod           | 1.83 | 69   | 12.09  | 87   | 22.16  |   |
| 2669 | Mief2          | 1.83 | 49   | 6.09   | 62   | 11.16  |   |
| 2670 | Cenpv          | 1.83 | 52   | 7.61   | 91   | 13.94  |   |
| 2671 | Arsa           | 1.83 | 129  | 8.48   | 159  | 15.53  |   |
| 2672 | Igsf3          | 1.83 | 167  | 5.08   | 204  | 9.3    |   |
| 2673 | Elac1          | 1.83 | 39   | 2.37   | 52   | 4.34   |   |
| 2674 | MGC94199_2     | 1.83 | 0    | 3.34   | 0    | 6.1    |   |
| 2675 | Limk2          | 1.83 | 84   | 3.36   | 107  | 6.15   |   |
| 2676 | Trrap          | 1.83 | 1218 | 22.08  | 1520 | 40.35  |   |
| 2677 | Fbxl17         | 1.83 | 189  | 8.63   | 238  | 15.76  |   |
| 2678 | Slc35e2b       | 1.83 | 84   | 4.05   | 68   | 7.39   |   |
| 2679 | LOC100361515   | 1.83 | 134  | 10.83  | 159  | 19.76  |   |
| 2680 | Tor2a          | 1.83 | 86   | 13.68  | 106  | 24.98  |   |
| 2681 | Mkln1          | 1.82 | 151  | 9.73   | 189  | 17.76  |   |
| 2682 | Vangl2         | 1.82 | 48   | 2.56   | 59   | 4.68   |   |
| 2683 | Tmem110        | 1.82 | 77   | 7.29   | 85   | 13.3   |   |
| 2684 | Zbtb45         | 1.82 | 66   | 7.14   | 82   | 13.02  |   |
| 2685 | Nvl            | 1.82 | 104  | 4.56   | 138  | 8.3    |   |
| 2686 | Aph1a          | 1.82 | 282  | 32.81  | 342  | 59.72  |   |
| 2687 | St6galnac6     | 1.82 | 132  | 11.52  | 148  | 20.97  |   |
| 2688 | LOC685186      | 1.82 | 95   | 427.72 | 208  | 778.1  |   |
| 2689 | Adamts2        | 1.82 | 1773 | 52.7   | 2026 | 95.79  |   |
| 2690 | AABR07014855.1 | 1.82 | 3    | 1.54   | 4    | 2.8    |   |
| 2691 | AABR07029056.1 | 1.82 | 0    | 4.22   | 0    | 7.67   |   |
| 2692 | AABR07060610.1 | 1.82 | 0    | 2.04   | 0    | 3.7    |   |
| 2693 | Cryz           | 1.82 | 29   | 2.62   | 36   | 4.76   |   |
| 2694 | Garnl3         | 1.82 | 42   | 0.64   | 22   | 1.16   |   |
| 2695 | Hmg1l1_1       | 1.82 | 1    | 1.58   | 3    | 2.87   |   |

Supplemental Table 2  
Vehicle versus FSH, 24 hours

|      | A           | B    | C    | D      | E    | F       | G |
|------|-------------|------|------|--------|------|---------|---|
| 2696 | Phf21a      | 1.82 | 298  | 11.32  | 319  | 20.56   |   |
| 2697 | Pih1d1      | 1.82 | 22   | 3.88   | 27   | 7.06    |   |
| 2698 | Rab13       | 1.82 | 27   | 5.61   | 35   | 10.19   |   |
| 2699 | Rarres2     | 1.82 | 3    | 1.47   | 5    | 2.67    |   |
| 2700 | Rsph3       | 1.82 | 15   | 0.55   | 27   | 0.99    |   |
| 2701 | Sfxn4       | 1.82 | 21   | 0.75   | 24   | 1.37    |   |
| 2702 | Tefm        | 1.82 | 18   | 2.65   | 25   | 4.81    |   |
| 2703 | Thrb        | 1.82 | 9    | 0.15   | 27   | 0.28    |   |
| 2704 | Abhd12      | 1.82 | 90   | 10.23  | 109  | 18.59   |   |
| 2705 | Acer2       | 1.82 | 9    | 0.19   | 8    | 0.35    |   |
| 2706 | Actr5       | 1.82 | 32   | 3.06   | 35   | 5.56    |   |
| 2707 | Clybl       | 1.82 | 31   | 2.41   | 49   | 4.38    |   |
| 2708 | Depdc7      | 1.82 | 12   | 1.17   | 13   | 2.12    |   |
| 2709 | Ercc4       | 1.82 | 24   | 3.98   | 35   | 7.23    |   |
| 2710 | Fam98c      | 1.82 | 19   | 2.36   | 23   | 4.28    |   |
| 2711 | Fbxw17      | 1.82 | 45   | 4.31   | 62   | 7.83    |   |
| 2712 | Gas7        | 1.82 | 6    | 0.37   | 11   | 0.67    |   |
| 2713 | Grik2       | 1.82 | 58   | 0.2    | 44   | 0.37    |   |
| 2714 | Has1        | 1.82 | 21   | 0.48   | 14   | 0.86    |   |
| 2715 | Haus1_2     | 1.82 | 0    | 1.27   | 1    | 2.3     |   |
| 2716 | Inafm1      | 1.82 | 4    | 0.67   | 5    | 1.22    |   |
| 2717 | LOC685431_2 | 1.82 | 0    | 0.77   | 0    | 1.39    |   |
| 2718 | Lrrc10b     | 1.82 | 4    | 0.81   | 5    | 1.47    |   |
| 2719 | Med30       | 1.82 | 28   | 5.57   | 33   | 10.12   |   |
| 2720 | Mlkl        | 1.82 | 19   | 0.95   | 19   | 1.72    |   |
| 2721 | N4bp2l1     | 1.82 | 8    | 0.47   | 16   | 0.85    |   |
| 2722 | Nicn1       | 1.82 | 51   | 5.37   | 60   | 9.75    |   |
| 2723 | Pcdhb8      | 1.82 | 4    | 0.43   | 4    | 0.77    |   |
| 2724 | Piwil4      | 1.82 | 11   | 0.63   | 14   | 1.14    |   |
| 2725 | Pot1        | 1.82 | 67   | 3.97   | 78   | 7.21    |   |
| 2726 | Reps2       | 1.82 | 14   | 1.12   | 24   | 2.03    |   |
| 2727 | Rgl2        | 1.82 | 109  | 8      | 130  | 14.52   |   |
| 2728 | Slmo2       | 1.82 | 86   | 27.12  | 96   | 49.26   |   |
| 2729 | Sptbn5      | 1.82 | 7    | 0.16   | 10   | 0.29    |   |
| 2730 | Tmem181     | 1.82 | 82   | 6.45   | 85   | 11.72   |   |
| 2731 | Zkscan1     | 1.82 | 129  | 9.53   | 163  | 17.31   |   |
| 2732 | Zswim5      | 1.82 | 57   | 1.93   | 55   | 3.5     |   |
| 2733 | Adcy2       | 1.82 | 29   | 0.62   | 22   | 1.13    |   |
| 2734 | Fat3        | 1.82 | 16   | 0.07   | 16   | 0.13    |   |
| 2735 | Itgae       | 1.82 | 64   | 0.76   | 84   | 1.37    |   |
| 2736 | Neil1       | 1.82 | 19   | 2.31   | 27   | 4.19    |   |
| 2737 | Nrm         | 1.82 | 10   | 2.44   | 10   | 4.44    |   |
| 2738 | Opn3        | 1.82 | 109  | 1.14   | 74   | 2.07    |   |
| 2739 | Prr22       | 1.82 | 4    | 0.44   | 5    | 0.8     |   |
| 2740 | Rabepk      | 1.82 | 53   | 3.8    | 57   | 6.91    |   |
| 2741 | RGD1566085  | 1.82 | 5    | 1.04   | 13   | 1.89    |   |
| 2742 | Slc22a18    | 1.82 | 19   | 1.3    | 18   | 2.36    |   |
| 2743 | Tfb2m       | 1.82 | 30   | 4.34   | 28   | 7.88    |   |
| 2744 | Wasf1       | 1.82 | 72   | 4.14   | 78   | 7.52    |   |
| 2745 | Naa35       | 1.81 | 249  | 19.37  | 288  | 35.11   |   |
| 2746 | Gja1        | 1.81 | 7352 | 573.87 | 9096 | 1040.24 |   |
| 2747 | Ap3m1       | 1.81 | 281  | 11.2   | 196  | 20.29   |   |
| 2748 | Aar2        | 1.81 | 139  | 8.02   | 171  | 14.52   |   |
| 2749 | Ssh3        | 1.81 | 76   | 5.66   | 87   | 10.25   |   |

Supplemental Table 2  
Vehicle versus FSH, 24 hours

|      | A          | B    | C    | D     | E    | F     | G |
|------|------------|------|------|-------|------|-------|---|
| 2750 | Ano8       | 1.81 | 133  | 9.86  | 155  | 17.85 |   |
| 2751 | Rap2b      | 1.81 | 57   | 25.73 | 70   | 46.57 |   |
| 2752 | Dram2      | 1.81 | 99   | 8.72  | 114  | 15.78 |   |
| 2753 | Tcn2       | 1.81 | 158  | 19.29 | 192  | 34.89 |   |
| 2754 | Casd1      | 1.81 | 71   | 4.71  | 77   | 8.51  |   |
| 2755 | Vps51      | 1.81 | 79   | 8.71  | 98   | 15.74 |   |
| 2756 | Alg2       | 1.81 | 119  | 9.81  | 148  | 17.73 |   |
| 2757 | Pip5k1c    | 1.81 | 137  | 6.63  | 157  | 11.98 |   |
| 2758 | Fbxo21     | 1.81 | 91   | 19.83 | 130  | 35.82 |   |
| 2759 | Slc25a15   | 1.81 | 36   | 2.41  | 46   | 4.35  |   |
| 2760 | Arl6ip5    | 1.81 | 239  | 33.9  | 253  | 61.22 |   |
| 2761 | Yif1b_2    | 1.81 | 0    | 4.11  | 0    | 7.42  |   |
| 2762 | Lamb2      | 1.8  | 1366 | 56.02 | 1675 | 101.1 |   |
| 2763 | Pomt2      | 1.8  | 100  | 4.33  | 114  | 7.81  |   |
| 2764 | Dexi       | 1.8  | 180  | 9.64  | 178  | 17.38 |   |
| 2765 | Sardh      | 1.8  | 69   | 3.27  | 99   | 5.9   |   |
| 2766 | Zer1       | 1.8  | 370  | 18.3  | 432  | 32.99 |   |
| 2767 | Lrif1      | 1.8  | 37   | 1.92  | 44   | 3.47  |   |
| 2768 | Rhobtb2    | 1.8  | 29   | 1.19  | 31   | 2.14  |   |
| 2769 | Pcif1      | 1.8  | 154  | 7.58  | 168  | 13.66 |   |
| 2770 | Carf       | 1.8  | 28   | 1.43  | 39   | 2.57  |   |
| 2771 | Arrdc3     | 1.8  | 45   | 6.24  | 53   | 11.22 |   |
| 2772 | Kctd13     | 1.8  | 36   | 3.08  | 37   | 5.54  |   |
| 2773 | Lama4      | 1.8  | 83   | 2.64  | 108  | 4.75  |   |
| 2774 | Mettl10    | 1.8  | 52   | 4.88  | 65   | 8.78  |   |
| 2775 | Nav2       | 1.8  | 705  | 10.88 | 909  | 19.58 |   |
| 2776 | Acads      | 1.8  | 120  | 14.24 | 141  | 25.61 |   |
| 2777 | Dennd2a    | 1.8  | 122  | 4.63  | 166  | 8.32  |   |
| 2778 | Fgfr1      | 1.8  | 125  | 6.71  | 150  | 12.06 |   |
| 2779 | Azin2      | 1.8  | 134  | 7.27  | 126  | 13.07 |   |
| 2780 | Psme2      | 1.8  | 24   | 29.05 | 22   | 52.23 |   |
| 2781 | Galns      | 1.8  | 113  | 4.57  | 146  | 8.2   |   |
| 2782 | Alkbh8     | 1.8  | 110  | 3.28  | 91   | 5.88  |   |
| 2783 | Capg       | 1.8  | 19   | 2.87  | 22   | 5.15  |   |
| 2784 | LOC499602  | 1.8  | 39   | 1.29  | 46   | 2.32  |   |
| 2785 | Ppapdc3    | 1.8  | 23   | 2.16  | 37   | 3.87  |   |
| 2786 | Fam160b2   | 1.79 | 159  | 8.64  | 189  | 15.51 |   |
| 2787 | Pnpla6     | 1.79 | 164  | 7.44  | 199  | 13.33 |   |
| 2788 | Il17rc     | 1.79 | 51   | 3.19  | 51   | 5.72  |   |
| 2789 | Ctc1       | 1.79 | 361  | 19.44 | 449  | 34.82 |   |
| 2790 | Prex2      | 1.79 | 183  | 5.36  | 251  | 9.6   |   |
| 2791 | Recql5     | 1.79 | 69   | 2.74  | 85   | 4.91  |   |
| 2792 | Fbxo46     | 1.79 | 89   | 4.78  | 96   | 8.55  |   |
| 2793 | Lgals3bp   | 1.79 | 131  | 14.17 | 165  | 25.37 |   |
| 2794 | RGD1311575 | 1.79 | 14   | 0.48  | 19   | 0.86  |   |
| 2795 | Zfp958     | 1.79 | 15   | 4.65  | 31   | 8.32  |   |
| 2796 | Tube1      | 1.79 | 39   | 1.14  | 40   | 2.04  |   |
| 2797 | Acp2       | 1.79 | 169  | 20.15 | 216  | 36.03 |   |
| 2798 | Znf740     | 1.79 | 172  | 9.48  | 201  | 16.94 |   |
| 2799 | Mum1       | 1.79 | 122  | 8.95  | 145  | 16    |   |
| 2800 | Klhl24     | 1.79 | 130  | 15.09 | 153  | 26.95 |   |
| 2801 | Slc39a11   | 1.79 | 100  | 3.73  | 130  | 6.67  |   |
| 2802 | Med16      | 1.79 | 57   | 8.46  | 71   | 15.11 |   |
| 2803 | Qars       | 1.78 | 327  | 27.99 | 399  | 49.95 |   |

Supplemental Table 2  
Vehicle versus FSH, 24 hours

|      | A            | B    | C   | D     | E   | F      | G |
|------|--------------|------|-----|-------|-----|--------|---|
| 2804 | Scap         | 1.78 | 277 | 14.56 | 341 | 25.99  |   |
| 2805 | Rsl24d1      | 1.78 | 114 | 18.21 | 139 | 32.48  |   |
| 2806 | Bud13        | 1.78 | 82  | 7.61  | 90  | 13.57  |   |
| 2807 | Fat4         | 1.78 | 221 | 4.29  | 252 | 7.65   |   |
| 2808 | Tdp2         | 1.78 | 84  | 5.51  | 79  | 9.82   |   |
| 2809 | Xkr8         | 1.78 | 25  | 2.07  | 28  | 3.69   |   |
| 2810 | Rhot2        | 1.78 | 124 | 10.41 | 152 | 18.56  |   |
| 2811 | Nr1d2        | 1.78 | 184 | 8.38  | 211 | 14.92  |   |
| 2812 | Eci3         | 1.78 | 186 | 15.61 | 237 | 27.8   |   |
| 2813 | Glt8d1       | 1.78 | 111 | 11.62 | 126 | 20.69  |   |
| 2814 | Mocs2        | 1.78 | 99  | 12.54 | 107 | 22.33  |   |
| 2815 | Pbxip1       | 1.78 | 430 | 34.24 | 510 | 60.95  |   |
| 2816 | Nadk         | 1.78 | 353 | 19.32 | 395 | 34.39  |   |
| 2817 | Tcp11l2      | 1.78 | 65  | 5.4   | 68  | 9.6    |   |
| 2818 | Fads2        | 1.78 | 368 | 58.3  | 422 | 103.64 |   |
| 2819 | Map7d2       | 1.78 | 25  | 1.06  | 32  | 1.88   |   |
| 2820 | Padi6        | 1.78 | 9   | 1.09  | 11  | 1.94   |   |
| 2821 | Ctnna2       | 1.78 | 12  | 1.57  | 17  | 2.78   |   |
| 2822 | LOC688765    | 1.78 | 9   | 1.18  | 11  | 2.1    |   |
| 2823 | Lrrc61       | 1.78 | 12  | 0.81  | 16  | 1.44   |   |
| 2824 | Lsm5         | 1.78 | 12  | 4.16  | 9   | 7.39   |   |
| 2825 | Zfp707       | 1.78 | 19  | 3.97  | 25  | 7.05   |   |
| 2826 | Aldh5a1      | 1.78 | 20  | 0.83  | 28  | 1.47   |   |
| 2827 | Cdc40        | 1.78 | 106 | 5.12  | 116 | 9.1    |   |
| 2828 | LOC100911224 | 1.78 | 0   | 1.21  | 0   | 2.16   |   |
| 2829 | Mbnl3        | 1.78 | 37  | 1.11  | 28  | 1.98   |   |
| 2830 | Ribc1        | 1.78 | 22  | 1.58  | 22  | 2.8    |   |
| 2831 | Robo1        | 1.78 | 107 | 3.18  | 143 | 5.65   |   |
| 2832 | SNORD27      | 1.78 | 9   | 30.3  | 11  | 53.82  |   |
| 2833 | Tpk1         | 1.78 | 54  | 1.35  | 67  | 2.39   |   |
| 2834 | U2af1l4      | 1.78 | 41  | 7.47  | 49  | 13.28  |   |
| 2835 | Zcchc10      | 1.78 | 31  | 2.32  | 20  | 4.12   |   |
| 2836 | Zfp120       | 1.78 | 9   | 1.82  | 12  | 3.23   |   |
| 2837 | Clptm1       | 1.78 | 620 | 57.58 | 737 | 102.23 |   |
| 2838 | Obsl1        | 1.78 | 559 | 21.98 | 663 | 39.03  |   |
| 2839 | Zmynd8       | 1.78 | 284 | 9.36  | 377 | 16.61  |   |
| 2840 | Uhrf1bp1l    | 1.77 | 248 | 11.37 | 293 | 20.17  |   |
| 2841 | Megf8        | 1.77 | 591 | 11.1  | 718 | 19.68  |   |
| 2842 | Disp1        | 1.77 | 194 | 5.4   | 233 | 9.57   |   |
| 2843 | Rhobtb1      | 1.77 | 419 | 13.05 | 510 | 23.14  |   |
| 2844 | Exoc3l2      | 1.77 | 52  | 4.32  | 64  | 7.66   |   |
| 2845 | Acsf3        | 1.77 | 64  | 4.92  | 61  | 8.72   |   |
| 2846 | Pik3r2       | 1.77 | 206 | 15.7  | 266 | 27.82  |   |
| 2847 | Mtm1         | 1.77 | 117 | 10.66 | 143 | 18.88  |   |
| 2848 | Ppp6r1       | 1.77 | 451 | 20.76 | 535 | 36.77  |   |
| 2849 | Rhno1        | 1.77 | 33  | 11.26 | 40  | 19.94  |   |
| 2850 | Rnf220       | 1.77 | 254 | 22.45 | 266 | 39.76  |   |
| 2851 | RGD1562987   | 1.77 | 97  | 20.99 | 107 | 37.15  |   |
| 2852 | Tmem126a     | 1.77 | 156 | 9.23  | 169 | 16.33  |   |
| 2853 | Zfp251       | 1.77 | 128 | 5.76  | 140 | 10.19  |   |
| 2854 | Fanca        | 1.77 | 46  | 1.27  | 43  | 2.25   |   |
| 2855 | Parp2        | 1.77 | 67  | 7.54  | 84  | 13.34  |   |
| 2856 | Cdk19        | 1.77 | 190 | 5.78  | 236 | 10.22  |   |
| 2857 | Zc3h7b       | 1.77 | 483 | 19.19 | 574 | 33.92  |   |

Supplemental Table 2  
Vehicle versus FSH, 24 hours

|      | A              | B    | C   | D     | E   | F     | G |
|------|----------------|------|-----|-------|-----|-------|---|
| 2858 | Tm7sf2         | 1.77 | 104 | 12.17 | 115 | 21.5  |   |
| 2859 | H2afy          | 1.77 | 580 | 36.86 | 606 | 65.11 |   |
| 2860 | Acp6           | 1.77 | 78  | 10.21 | 96  | 18.03 |   |
| 2861 | Pomt1          | 1.76 | 151 | 9.58  | 167 | 16.91 |   |
| 2862 | Mpv17          | 1.76 | 70  | 13.76 | 72  | 24.28 |   |
| 2863 | AABR07052523.1 | 1.76 | 1   | 2.09  | 2   | 3.69  |   |
| 2864 | D2hgdh         | 1.76 | 19  | 0.97  | 19  | 1.7   |   |
| 2865 | Slx1b          | 1.76 | 47  | 2.28  | 49  | 4.02  |   |
| 2866 | Xrcc6bp1       | 1.76 | 26  | 3.23  | 29  | 5.69  |   |
| 2867 | Tmem248        | 1.76 | 320 | 35.86 | 357 | 63.26 |   |
| 2868 | Fam73b         | 1.76 | 158 | 8.52  | 185 | 15.03 |   |
| 2869 | Enpp4          | 1.76 | 91  | 4.76  | 109 | 8.39  |   |
| 2870 | Hexdc          | 1.76 | 110 | 8.36  | 121 | 14.75 |   |
| 2871 | Vnn1           | 1.76 | 239 | 22.28 | 291 | 39.27 |   |
| 2872 | AABR07002627.1 | 1.76 | 50  | 6.43  | 87  | 11.32 |   |
| 2873 | LOC100360117   | 1.76 | 0   | 9.88  | 0   | 17.41 |   |
| 2874 | Obfc1          | 1.76 | 63  | 5.11  | 76  | 9.01  |   |
| 2875 | S1pr3          | 1.76 | 33  | 2.23  | 40  | 3.92  |   |
| 2876 | Zfp692         | 1.76 | 53  | 3.74  | 62  | 6.6   |   |
| 2877 | RGD621098      | 1.76 | 89  | 5.56  | 107 | 9.79  |   |
| 2878 | Rpp14          | 1.76 | 67  | 8.4   | 68  | 14.78 |   |
| 2879 | Cbx6           | 1.76 | 240 | 16.58 | 265 | 29.18 |   |
| 2880 | Ipp            | 1.76 | 78  | 4.02  | 76  | 7.07  |   |
| 2881 | Kbtbd3         | 1.76 | 26  | 0.97  | 24  | 1.71  |   |
| 2882 | Mrpl49         | 1.76 | 18  | 9.3   | 21  | 16.36 |   |
| 2883 | Dhx35          | 1.76 | 68  | 1.94  | 66  | 3.41  |   |
| 2884 | Fzd8           | 1.76 | 0   | 1.59  | 0   | 2.79  |   |
| 2885 | Gnpda1         | 1.76 | 63  | 6.99  | 74  | 12.29 |   |
| 2886 | Scrn2          | 1.76 | 24  | 3.17  | 25  | 5.58  |   |
| 2887 | Tor1a          | 1.76 | 99  | 12.7  | 104 | 22.33 |   |
| 2888 | Zfp710         | 1.76 | 90  | 3.97  | 93  | 6.97  |   |
| 2889 | Galnt10        | 1.76 | 167 | 10.23 | 209 | 17.97 |   |
| 2890 | Ifnar1         | 1.76 | 257 | 13.72 | 301 | 24.1  |   |
| 2891 | Slc2a8         | 1.76 | 32  | 2.87  | 34  | 5.03  |   |
| 2892 | Tmed4          | 1.76 | 60  | 30.05 | 110 | 52.76 |   |
| 2893 | Sobp           | 1.75 | 93  | 2.78  | 98  | 4.88  |   |
| 2894 | Lmbrd1         | 1.75 | 92  | 6.16  | 111 | 10.8  |   |
| 2895 | Btrc           | 1.75 | 280 | 6.6   | 350 | 11.57 |   |
| 2896 | Tp53           | 1.75 | 390 | 38.08 | 429 | 66.73 |   |
| 2897 | Klhl42         | 1.75 | 46  | 3.01  | 52  | 5.27  |   |
| 2898 | Ii10rb         | 1.75 | 58  | 6.76  | 77  | 11.83 |   |
| 2899 | Dnaja4         | 1.75 | 72  | 6.68  | 89  | 11.69 |   |
| 2900 | Mfap2          | 1.75 | 102 | 23.62 | 123 | 41.32 |   |
| 2901 | Hif1a          | 1.75 | 798 | 47.27 | 957 | 82.68 |   |
| 2902 | Uggt2          | 1.75 | 187 | 6.54  | 194 | 11.43 |   |
| 2903 | Upf3b          | 1.75 | 123 | 6.26  | 164 | 10.94 |   |
| 2904 | LOC498369      | 1.75 | 365 | 18.15 | 399 | 31.73 |   |
| 2905 | Rgs2           | 1.75 | 139 | 38.18 | 167 | 66.74 |   |
| 2906 | Calcoco1       | 1.75 | 0   | 6.03  | 0   | 10.53 |   |
| 2907 | Rab4b          | 1.75 | 194 | 32.95 | 208 | 57.59 |   |
| 2908 | Pld3           | 1.75 | 237 | 26.83 | 293 | 46.89 |   |
| 2909 | Myo1b          | 1.75 | 463 | 20.57 | 633 | 35.92 |   |
| 2910 | LOC100361056   | 1.74 | 31  | 4.55  | 32  | 7.93  |   |
| 2911 | LOC685520      | 1.74 | 0   | 1.51  | 0   | 2.64  |   |

Supplemental Table 2  
Vehicle versus FSH, 24 hours

|      | A            | B    | C   | D      | E   | F      | G |
|------|--------------|------|-----|--------|-----|--------|---|
| 2912 | LOC689986    | 1.74 | 2   | 0.35   | 4   | 0.62   |   |
| 2913 | S100a13      | 1.74 | 13  | 2.57   | 10  | 4.49   |   |
| 2914 | Serpinc1     | 1.74 | 117 | 0.36   | 128 | 0.63   |   |
| 2915 | Abca4        | 1.74 | 19  | 0.17   | 15  | 0.3    |   |
| 2916 | AC132752.2   | 1.74 | 6   | 3.96   | 6   | 6.9    |   |
| 2917 | Ache         | 1.74 | 7   | 0.37   | 8   | 0.65   |   |
| 2918 | Arhgap4      | 1.74 | 7   | 0.39   | 8   | 0.68   |   |
| 2919 | C2_2         | 1.74 | 1   | 0.48   | 1   | 0.83   |   |
| 2920 | Chic1        | 1.74 | 24  | 0.7    | 29  | 1.23   |   |
| 2921 | Cyb5d2       | 1.74 | 8   | 0.86   | 14  | 1.5    |   |
| 2922 | Ggact        | 1.74 | 20  | 3.7    | 30  | 6.45   |   |
| 2923 | Gla          | 1.74 | 60  | 9.86   | 63  | 17.2   |   |
| 2924 | LOC100910581 | 1.74 | 0   | 1.33   | 0   | 2.31   |   |
| 2925 | Lpin1        | 1.74 | 69  | 4.43   | 89  | 7.73   |   |
| 2926 | Ndufb7       | 1.74 | 111 | 42.65  | 128 | 74.37  |   |
| 2927 | Pex26        | 1.74 | 51  | 2.75   | 60  | 4.79   |   |
| 2928 | Rab40c       | 1.74 | 59  | 4.09   | 79  | 7.13   |   |
| 2929 | Rad51        | 1.74 | 15  | 1.72   | 19  | 3.01   |   |
| 2930 | Rundc3a      | 1.74 | 5   | 0.61   | 9   | 1.06   |   |
| 2931 | Sap30        | 1.74 | 10  | 3.78   | 12  | 6.58   |   |
| 2932 | Spata9       | 1.74 | 24  | 1.2    | 27  | 2.1    |   |
| 2933 | Zfp551       | 1.74 | 5   | 0.29   | 6   | 0.5    |   |
| 2934 | Cfap70       | 1.74 | 10  | 0.31   | 14  | 0.54   |   |
| 2935 | Nat14        | 1.74 | 10  | 1.64   | 13  | 2.86   |   |
| 2936 | Nrp2         | 1.74 | 159 | 5.28   | 181 | 9.21   |   |
| 2937 | Samd5        | 1.74 | 9   | 0.5    | 13  | 0.87   |   |
| 2938 | Sfxn5        | 1.74 | 16  | 0.5    | 12  | 0.86   |   |
| 2939 | Szt2         | 1.74 | 204 | 4.03   | 244 | 7.01   |   |
| 2940 | Sgpl1        | 1.74 | 290 | 14.27  | 336 | 24.83  |   |
| 2941 | Traf2        | 1.74 | 109 | 9.75   | 122 | 16.97  |   |
| 2942 | Id1          | 1.74 | 91  | 23.93  | 109 | 41.57  |   |
| 2943 | Irf2         | 1.74 | 91  | 3.23   | 91  | 5.62   |   |
| 2944 | Samd10       | 1.74 | 42  | 5      | 51  | 8.68   |   |
| 2945 | Pdlim4       | 1.74 | 111 | 17.37  | 120 | 30.17  |   |
| 2946 | Bche         | 1.74 | 116 | 4.19   | 134 | 7.27   |   |
| 2947 | Ctdsp1       | 1.74 | 388 | 28.68  | 460 | 49.77  |   |
| 2948 | Gstp1        | 1.73 | 501 | 163.95 | 609 | 284.38 |   |
| 2949 | Snap47       | 1.73 | 58  | 4.37   | 64  | 7.58   |   |
| 2950 | Rbm45        | 1.73 | 88  | 8.58   | 107 | 14.88  |   |
| 2951 | Pafah2       | 1.73 | 39  | 2.46   | 41  | 4.26   |   |
| 2952 | Camsap3      | 1.73 | 59  | 2.95   | 71  | 5.11   |   |
| 2953 | Lime1        | 1.73 | 29  | 3.43   | 39  | 5.94   |   |
| 2954 | Parl         | 1.73 | 38  | 9.34   | 55  | 16.18  |   |
| 2955 | Adgrf5       | 1.73 | 105 | 2.73   | 123 | 4.73   |   |
| 2956 | Cyp2c13_1    | 1.73 | 124 | 17.66  | 160 | 30.58  |   |
| 2957 | Lrp12        | 1.73 | 211 | 11.59  | 243 | 20.08  |   |
| 2958 | Pkdcc        | 1.73 | 60  | 6.31   | 67  | 10.93  |   |
| 2959 | Stom         | 1.73 | 71  | 6.74   | 83  | 11.67  |   |
| 2960 | Glul         | 1.73 | 274 | 27.27  | 329 | 47.21  |   |
| 2961 | Psenen       | 1.73 | 75  | 31.85  | 85  | 55.13  |   |
| 2962 | Top3b        | 1.73 | 148 | 9.27   | 149 | 16.03  |   |
| 2963 | Tspan15      | 1.73 | 50  | 5.95   | 37  | 10.3   |   |
| 2964 | Tor1aip2_1   | 1.73 | 13  | 6.68   | 16  | 11.56  |   |
| 2965 | Trappc6a     | 1.73 | 25  | 5.42   | 45  | 9.38   |   |

Supplemental Table 2  
Vehicle versus FSH, 24 hours

|      | A          | B    | C    | D      | E    | F      | G |
|------|------------|------|------|--------|------|--------|---|
| 2966 | AC141516.3 | 1.73 | 9    | 10.42  | 8    | 18.03  |   |
| 2967 | RT1-CE4    | 1.73 | 22   | 2.28   | 17   | 3.95   |   |
| 2968 | Masp1      | 1.73 | 4740 | 183.58 | 6273 | 317.31 |   |
| 2969 | Ermard     | 1.73 | 86   | 4.53   | 100  | 7.82   |   |
| 2970 | Ino80c     | 1.73 | 50   | 3.56   | 53   | 6.16   |   |
| 2971 | Dzip1      | 1.73 | 156  | 12.55  | 193  | 21.67  |   |
| 2972 | Bcat2      | 1.73 | 163  | 21.79  | 179  | 37.61  |   |
| 2973 | LOC691135  | 1.73 | 12   | 0.94   | 10   | 1.63   |   |
| 2974 | Lpar2      | 1.73 | 18   | 1.94   | 19   | 3.35   |   |
| 2975 | Taf1a      | 1.73 | 36   | 2.93   | 24   | 5.06   |   |
| 2976 | Tm9sf1     | 1.73 | 163  | 13.26  | 188  | 22.88  |   |
| 2977 | Fam69a     | 1.73 | 22   | 1.79   | 29   | 3.08   |   |
| 2978 | Hscb       | 1.73 | 38   | 4.18   | 41   | 7.21   |   |
| 2979 | Sin3a      | 1.72 | 339  | 16.51  | 402  | 28.48  |   |
| 2980 | Gtf2i      | 1.72 | 979  | 46.54  | 1175 | 80.28  |   |
| 2981 | Gripap1    | 1.72 | 176  | 10.14  | 218  | 17.49  |   |
| 2982 | Mul1       | 1.72 | 77   | 4.4    | 90   | 7.58   |   |
| 2983 | Casp2      | 1.72 | 174  | 11.1   | 206  | 19.13  |   |
| 2984 | Plbd2      | 1.72 | 311  | 34.36  | 369  | 59.19  |   |
| 2985 | Ssbp3      | 1.72 | 445  | 39.09  | 510  | 67.33  |   |
| 2986 | Zfp786     | 1.72 | 28   | 1.58   | 34   | 2.72   |   |
| 2987 | Tshz1      | 1.72 | 389  | 30.63  | 461  | 52.74  |   |
| 2988 | Pik3c3     | 1.72 | 88   | 5.22   | 102  | 8.99   |   |
| 2989 | Pank1      | 1.72 | 139  | 9.5    | 159  | 16.35  |   |
| 2990 | Tbc1d17    | 1.72 | 126  | 12.16  | 150  | 20.92  |   |
| 2991 | Kctd2      | 1.72 | 64   | 7.46   | 81   | 12.84  |   |
| 2992 | Peo1       | 1.72 | 54   | 3.39   | 60   | 5.83   |   |
| 2993 | Rxra       | 1.72 | 71   | 7.53   | 95   | 12.95  |   |
| 2994 | RT1-A1     | 1.72 | 150  | 13.99  | 161  | 24.06  |   |
| 2995 | Has3       | 1.72 | 18   | 0.39   | 20   | 0.68   |   |
| 2996 | Usp30      | 1.72 | 103  | 6.09   | 122  | 10.46  |   |
| 2997 | Cpne8      | 1.72 | 37   | 1.62   | 43   | 2.79   |   |
| 2998 | Efna4      | 1.72 | 27   | 3.62   | 37   | 6.22   |   |
| 2999 | Lmo3       | 1.72 | 18   | 1.15   | 22   | 1.97   |   |
| 3000 | RGD1309540 | 1.72 | 159  | 6.98   | 159  | 11.99  |   |
| 3001 | Rita1      | 1.72 | 15   | 2.15   | 13   | 3.69   |   |
| 3002 | Grin2d     | 1.72 | 30   | 0.52   | 18   | 0.9    |   |
| 3003 | Sppl2b     | 1.72 | 157  | 12.2   | 177  | 20.94  |   |
| 3004 | Arhgap39   | 1.72 | 114  | 3.3    | 139  | 5.65   |   |
| 3005 | Cdkl5      | 1.71 | 168  | 4.23   | 235  | 7.25   |   |
| 3006 | Prps2      | 1.71 | 769  | 64.53  | 930  | 110.63 |   |
| 3007 | Fbn2       | 1.71 | 235  | 7.28   | 283  | 12.47  |   |
| 3008 | Dalrd3     | 1.71 | 112  | 9.62   | 162  | 16.48  |   |
| 3009 | Bean1      | 1.71 | 44   | 7.06   | 54   | 12.09  |   |
| 3010 | Klhl7      | 1.71 | 182  | 9.23   | 205  | 15.81  |   |
| 3011 | Rxrb       | 1.71 | 113  | 6.63   | 139  | 11.35  |   |
| 3012 | Ndst1      | 1.71 | 286  | 16.26  | 322  | 27.83  |   |
| 3013 | Ccdc120    | 1.71 | 66   | 2.89   | 63   | 4.95   |   |
| 3014 | Eepd1      | 1.71 | 75   | 4.97   | 89   | 8.5    |   |
| 3015 | RGD1560212 | 1.71 | 18   | 6.73   | 21   | 11.51  |   |
| 3016 | Tsc22d3_1  | 1.71 | 90   | 11.58  | 106  | 19.81  |   |
| 3017 | Bag6       | 1.71 | 1068 | 64.77  | 1238 | 110.85 |   |
| 3018 | Ergic3     | 1.71 | 239  | 39.21  | 269  | 67.08  |   |
| 3019 | Cblb       | 1.71 | 273  | 6.78   | 319  | 11.59  |   |



Supplemental Table 2  
Vehicle versus FSH, 24 hours

|      | A              | B    | C    | D     | E    | F      | G |
|------|----------------|------|------|-------|------|--------|---|
| 3020 | Spg20          | 1.71 | 128  | 7.05  | 144  | 12.06  |   |
| 3021 | Dync2li1       | 1.71 | 22   | 2.49  | 23   | 4.26   |   |
| 3022 | Pigy           | 1.71 | 20   | 2.83  | 24   | 4.84   |   |
| 3023 | Thbs3          | 1.71 | 78   | 5.37  | 86   | 9.19   |   |
| 3024 | Mbtd1          | 1.71 | 142  | 5.57  | 177  | 9.52   |   |
| 3025 | Tmub2          | 1.71 | 97   | 7.85  | 102  | 13.4   |   |
| 3026 | Slc9a8         | 1.71 | 178  | 8     | 195  | 13.65  |   |
| 3027 | Tmem205        | 1.71 | 29   | 3.97  | 29   | 6.77   |   |
| 3028 | Tob1           | 1.71 | 183  | 22.61 | 214  | 38.56  |   |
| 3029 | Btf3l4         | 1.71 | 27   | 12.01 | 29   | 20.49  |   |
| 3030 | Aldh6a1        | 1.7  | 91   | 8.79  | 96   | 14.97  |   |
| 3031 | Rasef          | 1.7  | 43   | 3.57  | 55   | 6.08   |   |
| 3032 | Alms1          | 1.7  | 166  | 2.99  | 199  | 5.09   |   |
| 3033 | Cenpe          | 1.7  | 160  | 4.41  | 208  | 7.51   |   |
| 3034 | Gns_2          | 1.7  | 196  | 27.61 | 211  | 46.94  |   |
| 3035 | C1r            | 1.7  | 459  | 40.75 | 532  | 69.28  |   |
| 3036 | Pigt           | 1.7  | 487  | 49.14 | 554  | 83.51  |   |
| 3037 | Cdk5rap3       | 1.7  | 70   | 7.6   | 73   | 12.92  |   |
| 3038 | Ppm1l          | 1.7  | 136  | 3.82  | 158  | 6.49   |   |
| 3039 | Ambra1         | 1.7  | 436  | 13.99 | 501  | 23.75  |   |
| 3040 | Megf9          | 1.7  | 129  | 7.71  | 137  | 13.09  |   |
| 3041 | Tgfa           | 1.7  | 145  | 6.92  | 179  | 11.74  |   |
| 3042 | Med13l         | 1.7  | 871  | 19.58 | 993  | 33.22  |   |
| 3043 | Hsd17b4        | 1.7  | 214  | 16.71 | 233  | 28.35  |   |
| 3044 | Gata4          | 1.7  | 1168 | 66.54 | 1370 | 112.88 |   |
| 3045 | Stat3          | 1.7  | 449  | 22.9  | 535  | 38.84  |   |
| 3046 | AABR07013202.1 | 1.7  | 4    | 1.76  | 5    | 2.99   |   |
| 3047 | AABR07030911.1 | 1.7  | 1    | 3.3   | 0    | 5.59   |   |
| 3048 | AC105693.1     | 1.7  | 9    | 1.71  | 17   | 2.9    |   |
| 3049 | Asb13          | 1.7  | 32   | 3.14  | 32   | 5.32   |   |
| 3050 | Cd1d1          | 1.7  | 18   | 2.44  | 22   | 4.14   |   |
| 3051 | Gatsl3         | 1.7  | 6    | 0.94  | 8    | 1.6    |   |
| 3052 | Gemin4         | 1.7  | 102  | 7.5   | 120  | 12.72  |   |
| 3053 | Gli4           | 1.7  | 43   | 2.62  | 48   | 4.45   |   |
| 3054 | Grasp          | 1.7  | 10   | 0.73  | 6    | 1.23   |   |
| 3055 | LOC100911721   | 1.7  | 0    | 0.89  | 1    | 1.51   |   |
| 3056 | Mpv17l2        | 1.7  | 19   | 2.65  | 21   | 4.49   |   |
| 3057 | Nceh1          | 1.7  | 130  | 7.69  | 136  | 13.04  |   |
| 3058 | RGD1562339     | 1.7  | 34   | 6.05  | 43   | 10.26  |   |
| 3059 | RragB_2        | 1.7  | 0    | 1.14  | 0    | 1.93   |   |
| 3060 | Sap25          | 1.7  | 8    | 1.26  | 7    | 2.14   |   |
| 3061 | Slc29a1        | 1.7  | 7    | 0.71  | 11   | 1.2    |   |
| 3062 | Slitrk6        | 1.7  | 7    | 0.35  | 7    | 0.6    |   |
| 3063 | AABR07029195.1 | 1.7  | 2    | 3.68  | 2    | 6.23   |   |
| 3064 | Gramd1c_1      | 1.7  | 6    | 0.45  | 5    | 0.76   |   |
| 3065 | Il6r           | 1.7  | 30   | 1.3   | 38   | 2.21   |   |
| 3066 | Mis18bp1       | 1.7  | 30   | 0.81  | 31   | 1.37   |   |
| 3067 | Nxpe3          | 1.7  | 11   | 0.45  | 11   | 0.76   |   |
| 3068 | Pcdhb19        | 1.7  | 6    | 0.62  | 7    | 1.05   |   |
| 3069 | Rnf123         | 1.7  | 126  | 8.04  | 137  | 13.63  |   |
| 3070 | Rundc3b        | 1.7  | 17   | 0.4   | 21   | 0.68   |   |
| 3071 | Syne3          | 1.7  | 14   | 0.49  | 23   | 0.83   |   |
| 3072 | Ttc39c         | 1.7  | 53   | 3.59  | 62   | 6.08   |   |
| 3073 | Ttf2           | 1.7  | 73   | 3.96  | 109  | 6.7    |   |

Supplemental Table 2  
Vehicle versus FSH, 24 hours

|      | A              | B    | C    | D     | E    | F      | G |
|------|----------------|------|------|-------|------|--------|---|
| 3074 | Zmym1          | 1.7  | 36   | 1.17  | 30   | 1.98   |   |
| 3075 | Tacc1          | 1.69 | 359  | 9.98  | 430  | 16.9   |   |
| 3076 | Aplp2          | 1.69 | 1089 | 73.57 | 1263 | 124.54 |   |
| 3077 | Reln           | 1.69 | 120  | 1.91  | 143  | 3.23   |   |
| 3078 | Zfp512         | 1.69 | 134  | 6.31  | 133  | 10.68  |   |
| 3079 | Entpd5         | 1.69 | 78   | 3.61  | 100  | 6.12   |   |
| 3080 | Rnf166         | 1.69 | 102  | 10.36 | 110  | 17.54  |   |
| 3081 | Casp9          | 1.69 | 76   | 4.9   | 93   | 8.3    |   |
| 3082 | L3mbtl2        | 1.69 | 215  | 13.12 | 231  | 22.19  |   |
| 3083 | Vps28          | 1.69 | 129  | 29.58 | 153  | 50.03  |   |
| 3084 | Asl            | 1.69 | 43   | 7.66  | 52   | 12.95  |   |
| 3085 | LOC100911664   | 1.69 | 683  | 44.14 | 665  | 74.61  |   |
| 3086 | Rnf168         | 1.69 | 57   | 3.24  | 63   | 5.48   |   |
| 3087 | Trub1          | 1.69 | 90   | 2.59  | 99   | 4.38   |   |
| 3088 | Ago1           | 1.69 | 156  | 11.74 | 172  | 19.82  |   |
| 3089 | Abca3          | 1.69 | 446  | 14.45 | 477  | 24.4   |   |
| 3090 | AABR07052758.1 | 1.69 | 21   | 3.71  | 22   | 6.25   |   |
| 3091 | Armc10         | 1.69 | 146  | 15.24 | 154  | 25.71  |   |
| 3092 | Dcps           | 1.69 | 81   | 11.54 | 92   | 19.47  |   |
| 3093 | Drg2           | 1.69 | 89   | 12.74 | 84   | 21.49  |   |
| 3094 | Stim1          | 1.69 | 163  | 8.22  | 188  | 13.87  |   |
| 3095 | Nop10          | 1.69 | 73   | 30.78 | 100  | 51.9   |   |
| 3096 | Mrps33         | 1.69 | 27   | 10.61 | 34   | 17.89  |   |
| 3097 | Nipa1          | 1.69 | 38   | 3.39  | 50   | 5.71   |   |
| 3098 | Adi1           | 1.69 | 25   | 4.44  | 29   | 7.48   |   |
| 3099 | Dnase111       | 1.69 | 68   | 7.8   | 69   | 13.14  |   |
| 3100 | Phospho2       | 1.69 | 31   | 2.96  | 41   | 4.99   |   |
| 3101 | Tbc1d14        | 1.69 | 296  | 10.6  | 326  | 17.87  |   |
| 3102 | Tmem189        | 1.68 | 263  | 31.58 | 275  | 53.2   |   |
| 3103 | Akt2           | 1.68 | 369  | 36.29 | 388  | 61.14  |   |
| 3104 | Copz2          | 1.68 | 61   | 11.99 | 58   | 20.2   |   |
| 3105 | Ppwd1          | 1.68 | 62   | 4.47  | 68   | 7.53   |   |
| 3106 | RGD1309534     | 1.68 | 53   | 4.4   | 60   | 7.42   |   |
| 3107 | Fv1            | 1.68 | 134  | 17.76 | 148  | 29.9   |   |
| 3108 | Kdm4b          | 1.68 | 243  | 5.93  | 263  | 9.98   |   |
| 3109 | Fam73a         | 1.68 | 74   | 5.25  | 80   | 8.84   |   |
| 3110 | Jrkl           | 1.68 | 19   | 1.63  | 22   | 2.75   |   |
| 3111 | Mcee           | 1.68 | 21   | 5.82  | 27   | 9.8    |   |
| 3112 | Plek2          | 1.68 | 22   | 1.63  | 26   | 2.74   |   |
| 3113 | Ptcd2          | 1.68 | 43   | 2.78  | 44   | 4.69   |   |
| 3114 | Dock3          | 1.68 | 233  | 4.91  | 294  | 8.25   |   |
| 3115 | Abhd16a        | 1.68 | 177  | 9.8   | 191  | 16.48  |   |
| 3116 | Ccdc91         | 1.68 | 99   | 7.14  | 118  | 12     |   |
| 3117 | Senp1          | 1.68 | 47   | 6.55  | 56   | 11.01  |   |
| 3118 | Nelfa          | 1.68 | 159  | 15.28 | 194  | 25.68  |   |
| 3119 | Rspry1         | 1.68 | 99   | 8.4   | 115  | 14.11  |   |
| 3120 | Bahcc1         | 1.68 | 110  | 3.29  | 128  | 5.52   |   |
| 3121 | MGC94207       | 1.68 | 41   | 8.3   | 47   | 13.93  |   |
| 3122 | Lepr           | 1.68 | 33   | 0.75  | 59   | 1.26   |   |
| 3123 | Morn4          | 1.68 | 30   | 3.82  | 32   | 6.41   |   |
| 3124 | Nudt13         | 1.68 | 15   | 1.27  | 21   | 2.13   |   |
| 3125 | RGD1306271     | 1.68 | 107  | 2.54  | 133  | 4.26   |   |
| 3126 | Slu7           | 1.68 | 158  | 15.51 | 172  | 26.01  |   |
| 3127 | LOC102555377   | 1.68 | 28   | 1.2   | 21   | 2.01   |   |

Supplemental Table 2  
Vehicle versus FSH, 24 hours

|      | A              | B    | C   | D      | E    | F      | G |
|------|----------------|------|-----|--------|------|--------|---|
| 3128 | Prr3           | 1.68 | 138 | 9.92   | 146  | 16.63  |   |
| 3129 | Zfp53          | 1.68 | 28  | 3.27   | 30   | 5.49   |   |
| 3130 | RGD1304567     | 1.67 | 48  | 7.46   | 49   | 12.49  |   |
| 3131 | Kdm6a          | 1.67 | 308 | 12.12  | 380  | 20.26  |   |
| 3132 | Slc16a1        | 1.67 | 336 | 30.56  | 368  | 51.1   |   |
| 3133 | Tmx4           | 1.67 | 365 | 17.73  | 410  | 29.64  |   |
| 3134 | Foxo3          | 1.67 | 106 | 6.92   | 125  | 11.57  |   |
| 3135 | Wdr59          | 1.67 | 76  | 2.46   | 88   | 4.11   |   |
| 3136 | Acsl4          | 1.67 | 844 | 35.98  | 992  | 60.11  |   |
| 3137 | Zfp532         | 1.67 | 345 | 8.4    | 356  | 14.03  |   |
| 3138 | Usf2           | 1.67 | 147 | 13.23  | 174  | 22.09  |   |
| 3139 | Amn1           | 1.67 | 80  | 5.43   | 74   | 9.07   |   |
| 3140 | Panx1          | 1.67 | 41  | 2.31   | 50   | 3.85   |   |
| 3141 | Timm21         | 1.67 | 32  | 5.12   | 33   | 8.55   |   |
| 3142 | Abca7          | 1.67 | 26  | 0.99   | 31   | 1.65   |   |
| 3143 | Siah1          | 1.67 | 102 | 6.46   | 90   | 10.77  |   |
| 3144 | Rbm4b_2        | 1.67 | 81  | 15.74  | 102  | 26.23  |   |
| 3145 | St7l           | 1.67 | 119 | 2.73   | 133  | 4.54   |   |
| 3146 | Amfr           | 1.67 | 846 | 103.23 | 992  | 172.03 |   |
| 3147 | Fbn1           | 1.67 | 765 | 18.39  | 863  | 30.64  |   |
| 3148 | Clstn1         | 1.67 | 581 | 30.66  | 666  | 51.09  |   |
| 3149 | Ptk7           | 1.67 | 326 | 29.11  | 394  | 48.49  |   |
| 3150 | Ulk1           | 1.67 | 217 | 10.09  | 248  | 16.81  |   |
| 3151 | Xpo7           | 1.67 | 413 | 18.57  | 465  | 30.94  |   |
| 3152 | Dguok          | 1.67 | 100 | 8.43   | 113  | 14.04  |   |
| 3153 | Wdr33          | 1.66 | 338 | 12.11  | 397  | 20.16  |   |
| 3154 | Erlec1         | 1.66 | 153 | 14.63  | 164  | 24.34  |   |
| 3155 | Insr           | 1.66 | 346 | 10.58  | 412  | 17.61  |   |
| 3156 | Csrp2          | 1.66 | 443 | 68.75  | 478  | 114.35 |   |
| 3157 | Pycr2          | 1.66 | 85  | 12.82  | 96   | 21.32  |   |
| 3158 | Ralgapa1       | 1.66 | 337 | 9.01   | 358  | 14.99  |   |
| 3159 | Fst            | 1.66 | 135 | 25.23  | 146  | 41.96  |   |
| 3160 | Mdh1           | 1.66 | 585 | 105.32 | 679  | 175.11 |   |
| 3161 | Polr2a         | 1.66 | 922 | 33.21  | 1044 | 55.21  |   |
| 3162 | Dhx40          | 1.66 | 151 | 8.35   | 165  | 13.88  |   |
| 3163 | Tep1           | 1.66 | 328 | 9      | 364  | 14.96  |   |
| 3164 | AABR07028908.2 | 1.66 | 5   | 0.27   | 5    | 0.44   |   |
| 3165 | Alg8           | 1.66 | 43  | 2.62   | 40   | 4.35   |   |
| 3166 | Klhl15         | 1.66 | 27  | 0.75   | 25   | 1.25   |   |
| 3167 | Rhpn1          | 1.66 | 7   | 0.66   | 9    | 1.09   |   |
| 3168 | Scrn3          | 1.66 | 58  | 3.31   | 63   | 5.5    |   |
| 3169 | Als2cl         | 1.66 | 18  | 1.22   | 25   | 2.03   |   |
| 3170 | Ankle1         | 1.66 | 11  | 1.08   | 15   | 1.8    |   |
| 3171 | Atmin_2        | 1.66 | 90  | 7.36   | 103  | 12.22  |   |
| 3172 | Fscn1          | 1.66 | 11  | 1.18   | 12   | 1.96   |   |
| 3173 | Gca            | 1.66 | 41  | 2.83   | 28   | 4.7    |   |
| 3174 | Itpr1p1        | 1.66 | 14  | 1.86   | 16   | 3.09   |   |
| 3175 | Micb           | 1.66 | 65  | 5.82   | 72   | 9.66   |   |
| 3176 | Mme            | 1.66 | 333 | 23.12  | 369  | 38.39  |   |
| 3177 | Mthfsd         | 1.66 | 20  | 1.59   | 20   | 2.65   |   |
| 3178 | Pih1d2         | 1.66 | 18  | 1.34   | 13   | 2.22   |   |
| 3179 | Plagl1         | 1.66 | 7   | 0.38   | 7    | 0.62   |   |
| 3180 | RGD1566189     | 1.66 | 3   | 3.16   | 2    | 5.25   |   |
| 3181 | Zmat5          | 1.66 | 17  | 3.68   | 17   | 6.1    |   |

Supplemental Table 2  
Vehicle versus FSH, 24 hours

|      | A              | B    | C    | D      | E    | F      | G |
|------|----------------|------|------|--------|------|--------|---|
| 3182 | AABR07065886.1 | 1.66 | 5    | 2.16   | 5    | 3.58   |   |
| 3183 | Mmp19          | 1.66 | 36   | 4.35   | 40   | 7.22   |   |
| 3184 | Atg9a          | 1.66 | 235  | 13.3   | 262  | 22.08  |   |
| 3185 | Fmnl3          | 1.66 | 134  | 10.57  | 152  | 17.54  |   |
| 3186 | Ercc6          | 1.66 | 116  | 2.57   | 136  | 4.26   |   |
| 3187 | Cnp            | 1.66 | 216  | 23.06  | 241  | 38.24  |   |
| 3188 | Zfp410         | 1.66 | 189  | 10.74  | 196  | 17.8   |   |
| 3189 | Zfp687         | 1.66 | 128  | 8.14   | 149  | 13.49  |   |
| 3190 | Msi2           | 1.66 | 235  | 14.43  | 502  | 23.92  |   |
| 3191 | Dsc2           | 1.66 | 87   | 4.7    | 99   | 7.78   |   |
| 3192 | Grina          | 1.66 | 561  | 77.71  | 631  | 128.65 |   |
| 3193 | Phkg2          | 1.65 | 27   | 4.47   | 26   | 7.39   |   |
| 3194 | Ecd            | 1.65 | 73   | 7.51   | 85   | 12.43  |   |
| 3195 | Ccdc23         | 1.65 | 31   | 8.44   | 39   | 13.96  |   |
| 3196 | Gid4           | 1.65 | 87   | 4.52   | 98   | 7.47   |   |
| 3197 | Zfp523         | 1.65 | 94   | 7.91   | 105  | 13.08  |   |
| 3198 | Desi2          | 1.65 | 80   | 5.59   | 75   | 9.23   |   |
| 3199 | Tmem175        | 1.65 | 137  | 8.05   | 148  | 13.3   |   |
| 3200 | Tpcn2          | 1.65 | 41   | 1.82   | 51   | 3.01   |   |
| 3201 | Osgin2         | 1.65 | 62   | 5.63   | 68   | 9.3    |   |
| 3202 | Tmem219        | 1.65 | 33   | 2.45   | 35   | 4.04   |   |
| 3203 | Col16a1        | 1.65 | 321  | 12.93  | 346  | 21.35  |   |
| 3204 | Ctsl           | 1.65 | 820  | 119.65 | 908  | 197.45 |   |
| 3205 | Bace1          | 1.65 | 208  | 12.42  | 238  | 20.49  |   |
| 3206 | Cdr2l          | 1.65 | 109  | 5.4    | 117  | 8.9    |   |
| 3207 | Ascc1          | 1.65 | 145  | 18.62  | 198  | 30.72  |   |
| 3208 | Bcl9           | 1.65 | 171  | 6.45   | 211  | 10.64  |   |
| 3209 | RGD1359127     | 1.65 | 88   | 13.73  | 101  | 22.64  |   |
| 3210 | Gpaa1          | 1.65 | 145  | 17.4   | 169  | 28.69  |   |
| 3211 | Tmem101        | 1.65 | 50   | 7.64   | 61   | 12.6   |   |
| 3212 | Atm            | 1.65 | 343  | 2.71   | 359  | 4.46   |   |
| 3213 | Wdr81          | 1.65 | 147  | 4.84   | 164  | 7.98   |   |
| 3214 | Skiv2l         | 1.65 | 169  | 10.45  | 188  | 17.21  |   |
| 3215 | Mark4          | 1.65 | 340  | 21.95  | 363  | 36.17  |   |
| 3216 | Ptdss2         | 1.65 | 200  | 11.12  | 230  | 18.32  |   |
| 3217 | Ift172         | 1.65 | 60   | 2.19   | 60   | 3.6    |   |
| 3218 | LOC654482      | 1.65 | 25   | 2.84   | 28   | 4.68   |   |
| 3219 | Fitm2          | 1.65 | 60   | 3.35   | 67   | 5.52   |   |
| 3220 | Pigx           | 1.65 | 136  | 27     | 137  | 44.46  |   |
| 3221 | Slc11a2        | 1.65 | 161  | 6.77   | 175  | 11.15  |   |
| 3222 | Tmem128        | 1.65 | 170  | 25.76  | 167  | 42.4   |   |
| 3223 | Tubg1          | 1.65 | 179  | 31.71  | 181  | 52.19  |   |
| 3224 | Mtch1          | 1.65 | 799  | 98.02  | 885  | 161.33 |   |
| 3225 | Ctsz           | 1.65 | 107  | 19.49  | 123  | 32.07  |   |
| 3226 | Prkd1          | 1.64 | 100  | 2.8    | 129  | 4.6    |   |
| 3227 | Fgfr2          | 1.64 | 499  | 19.89  | 551  | 32.7   |   |
| 3228 | Rogdi          | 1.64 | 93   | 13.69  | 99   | 22.5   |   |
| 3229 | Man2b1         | 1.64 | 354  | 25.5   | 427  | 41.9   |   |
| 3230 | Ints5          | 1.64 | 94   | 7      | 103  | 11.5   |   |
| 3231 | LOC100910881   | 1.64 | 0    | 0.83   | 0    | 1.36   |   |
| 3232 | Repin1         | 1.64 | 55   | 5.11   | 53   | 8.39   |   |
| 3233 | Glg1           | 1.64 | 1176 | 35.23  | 1332 | 57.84  |   |
| 3234 | Prepl          | 1.64 | 64   | 4.7    | 86   | 7.72   |   |
| 3235 | Ubxn2b         | 1.64 | 171  | 5.53   | 170  | 9.08   |   |

Supplemental Table 2  
Vehicle versus FSH, 24 hours

|      | A              | B    | C    | D      | E    | F      | G |
|------|----------------|------|------|--------|------|--------|---|
| 3236 | Mto1           | 1.64 | 72   | 3.9    | 55   | 6.39   |   |
| 3237 | Aifm2          | 1.64 | 100  | 5.69   | 106  | 9.33   |   |
| 3238 | Rpn1           | 1.64 | 1224 | 133.74 | 1357 | 219.17 |   |
| 3239 | Txndc5         | 1.64 | 1107 | 100.52 | 1235 | 164.73 |   |
| 3240 | Fbxl12         | 1.64 | 53   | 6.17   | 58   | 10.11  |   |
| 3241 | Stx5           | 1.64 | 217  | 22     | 241  | 36.04  |   |
| 3242 | Adcy6          | 1.64 | 512  | 20.72  | 580  | 33.93  |   |
| 3243 | Dpagt1         | 1.64 | 143  | 13.52  | 161  | 22.14  |   |
| 3244 | Mrps17         | 1.64 | 72   | 13.57  | 84   | 22.21  |   |
| 3245 | Smo            | 1.64 | 324  | 20.98  | 353  | 34.35  |   |
| 3246 | Arhgef6        | 1.64 | 105  | 7.07   | 140  | 11.57  |   |
| 3247 | Vezf1          | 1.64 | 252  | 13.37  | 269  | 21.88  |   |
| 3248 | Sppl2a         | 1.64 | 67   | 5.98   | 48   | 9.79   |   |
| 3249 | Ctsd           | 1.64 | 600  | 72.46  | 667  | 118.54 |   |
| 3250 | Fam174a        | 1.63 | 52   | 8.67   | 61   | 14.17  |   |
| 3251 | Slc16a7        | 1.63 | 20   | 0.81   | 18   | 1.33   |   |
| 3252 | Zfp235         | 1.63 | 77   | 0.85   | 66   | 1.38   |   |
| 3253 | Ap4m1          | 1.63 | 54   | 7.32   | 60   | 11.96  |   |
| 3254 | Cbwd1          | 1.63 | 37   | 1.82   | 35   | 2.97   |   |
| 3255 | Cntnap3        | 1.63 | 26   | 1.4    | 29   | 2.28   |   |
| 3256 | Cxcl16         | 1.63 | 8    | 1.17   | 9    | 1.91   |   |
| 3257 | Emilin1        | 1.63 | 8    | 0.52   | 10   | 0.85   |   |
| 3258 | Ftl1           | 1.63 | 95   | 234.72 | 106  | 383.71 |   |
| 3259 | Hook2          | 1.63 | 34   | 2.3    | 36   | 3.77   |   |
| 3260 | LOC100911727   | 1.63 | 0    | 0.8    | 0    | 1.3    |   |
| 3261 | LOC102553866   | 1.63 | 17   | 1.11   | 18   | 1.82   |   |
| 3262 | Marc2          | 1.63 | 59   | 6.16   | 70   | 10.07  |   |
| 3263 | Rnf215         | 1.63 | 81   | 7.2    | 95   | 11.77  |   |
| 3264 | Slc10a7        | 1.63 | 170  | 4.61   | 163  | 7.54   |   |
| 3265 | Smpd2          | 1.63 | 35   | 4.79   | 37   | 7.82   |   |
| 3266 | Tceanc2        | 1.63 | 39   | 5.13   | 50   | 8.39   |   |
| 3267 | Wdr62_2        | 1.63 | 0    | 0.39   | 0    | 0.64   |   |
| 3268 | Zswim8         | 1.63 | 0    | 0.73   | 0    | 1.2    |   |
| 3269 | AABR07042514.3 | 1.63 | 32   | 19.74  | 41   | 32.26  |   |
| 3270 | Chac2          | 1.63 | 13   | 1.65   | 13   | 2.7    |   |
| 3271 | Ctu1           | 1.63 | 26   | 2.66   | 27   | 4.35   |   |
| 3272 | Gabarapl1      | 1.63 | 201  | 27.19  | 219  | 44.45  |   |
| 3273 | MGC116121      | 1.63 | 58   | 7.44   | 70   | 12.17  |   |
| 3274 | Mmp2           | 1.63 | 8    | 0.65   | 9    | 1.06   |   |
| 3275 | Porcn          | 1.63 | 18   | 2.13   | 19   | 3.48   |   |
| 3276 | Rsl1d1         | 1.63 | 0    | 1.23   | 0    | 2.01   |   |
| 3277 | 03/06/15       | 1.63 | 277  | 17.93  | 287  | 29.29  |   |
| 3278 | LOC100911674   | 1.63 | 121  | 9.47   | 137  | 15.47  |   |
| 3279 | Pxylp1         | 1.63 | 88   | 6.43   | 98   | 10.5   |   |
| 3280 | Slc35b2        | 1.63 | 160  | 20.85  | 176  | 34.02  |   |
| 3281 | Cables1        | 1.63 | 118  | 4.7    | 115  | 7.66   |   |
| 3282 | Tmem120a       | 1.63 | 109  | 14.42  | 128  | 23.52  |   |
| 3283 | Wrb            | 1.63 | 140  | 13.06  | 147  | 21.29  |   |
| 3284 | Poldip2        | 1.63 | 153  | 22.18  | 167  | 36.15  |   |
| 3285 | Slc39a3        | 1.63 | 78   | 4.98   | 95   | 8.11   |   |
| 3286 | Eya3           | 1.63 | 368  | 18.24  | 410  | 29.72  |   |
| 3287 | Rbm43          | 1.63 | 39   | 4.34   | 46   | 7.07   |   |
| 3288 | Gtf2h2         | 1.63 | 43   | 5.39   | 50   | 8.78   |   |
| 3289 | Aars2          | 1.63 | 57   | 3.25   | 61   | 5.29   |   |

Supplemental Table 2  
Vehicle versus FSH, 24 hours

|      | A              | B    | C   | D     | E   | F     | G |
|------|----------------|------|-----|-------|-----|-------|---|
| 3290 | Gpm6a          | 1.63 | 30  | 2.09  | 33  | 3.4   |   |
| 3291 | RGD1311164     | 1.63 | 37  | 2.79  | 45  | 4.54  |   |
| 3292 | RGD1565784     | 1.63 | 25  | 3.62  | 28  | 5.89  |   |
| 3293 | Hdac8          | 1.63 | 85  | 3.17  | 103 | 5.16  |   |
| 3294 | Ctbs           | 1.63 | 76  | 14.19 | 71  | 23.08 |   |
| 3295 | Pan2           | 1.63 | 101 | 5.37  | 130 | 8.74  |   |
| 3296 | Mib2           | 1.63 | 140 | 7.74  | 159 | 12.58 |   |
| 3297 | Foxm1          | 1.63 | 66  | 4.3   | 74  | 6.99  |   |
| 3298 | Aga            | 1.63 | 107 | 16.02 | 116 | 26.04 |   |
| 3299 | Ap3s2          | 1.63 | 90  | 15.3  | 100 | 24.86 |   |
| 3300 | Camta2         | 1.62 | 155 | 7.13  | 168 | 11.58 |   |
| 3301 | Chst2          | 1.62 | 34  | 5.32  | 38  | 8.64  |   |
| 3302 | Amacr          | 1.62 | 27  | 2.45  | 30  | 3.97  |   |
| 3303 | Mapre2         | 1.62 | 67  | 7.82  | 68  | 12.69 |   |
| 3304 | Nudt2          | 1.62 | 27  | 4.68  | 27  | 7.6   |   |
| 3305 | AABR07072440.1 | 1.62 | 0   | 14.56 | 1   | 23.64 |   |
| 3306 | Eif3f          | 1.62 | 398 | 70.6  | 427 | 114.6 |   |
| 3307 | Slc4a3         | 1.62 | 203 | 9.2   | 223 | 14.93 |   |
| 3308 | Ptprd          | 1.62 | 590 | 11.23 | 694 | 18.23 |   |
| 3309 | Elp3           | 1.62 | 370 | 23.29 | 385 | 37.78 |   |
| 3310 | Nudt5          | 1.62 | 62  | 7.94  | 69  | 12.88 |   |
| 3311 | Abcb8          | 1.62 | 126 | 7.32  | 123 | 11.87 |   |
| 3312 | Evc            | 1.62 | 63  | 3     | 72  | 4.87  |   |
| 3313 | Rrnad1         | 1.62 | 56  | 3.19  | 61  | 5.16  |   |
| 3314 | Lrrc57         | 1.62 | 20  | 3.57  | 24  | 5.79  |   |
| 3315 | Ndfip1         | 1.62 | 497 | 56.97 | 540 | 92.32 |   |
| 3316 | Bmp1           | 1.62 | 388 | 21.38 | 417 | 34.65 |   |
| 3317 | Mapk9          | 1.62 | 223 | 10.84 | 261 | 17.56 |   |
| 3318 | Suds3          | 1.62 | 273 | 21.02 | 282 | 34.05 |   |
| 3319 | Uevld          | 1.62 | 75  | 3.21  | 63  | 5.2   |   |
| 3320 | Sil1           | 1.62 | 87  | 6.73  | 95  | 10.9  |   |
| 3321 | Mier1          | 1.62 | 267 | 8.84  | 271 | 14.3  |   |
| 3322 | Extl3          | 1.62 | 233 | 17.27 | 255 | 27.93 |   |
| 3323 | Cd99l2_2       | 1.62 | 94  | 27.59 | 108 | 44.59 |   |
| 3324 | Zfp516         | 1.62 | 210 | 9.34  | 265 | 15.08 |   |
| 3325 | Asb1           | 1.61 | 10  | 1.11  | 12  | 1.79  |   |
| 3326 | Atg4a          | 1.61 | 26  | 1.83  | 16  | 2.95  |   |
| 3327 | Atraid         | 1.61 | 46  | 10.9  | 54  | 17.59 |   |
| 3328 | Cfp            | 1.61 | 47  | 3.03  | 53  | 4.9   |   |
| 3329 | Cisd3          | 1.61 | 21  | 4.56  | 22  | 7.37  |   |
| 3330 | Crem           | 1.61 | 68  | 1.92  | 72  | 3.11  |   |
| 3331 | Depdc1b        | 1.61 | 18  | 0.9   | 15  | 1.45  |   |
| 3332 | Dnajc4         | 1.61 | 13  | 2.31  | 12  | 3.73  |   |
| 3333 | Ssc4d          | 1.61 | 28  | 2.55  | 29  | 4.11  |   |
| 3334 | Brpf3          | 1.61 | 200 | 7.11  | 223 | 11.48 |   |
| 3335 | Ccdc126        | 1.61 | 40  | 3.9   | 45  | 6.29  |   |
| 3336 | Lmbr1          | 1.61 | 39  | 2.69  | 42  | 4.34  |   |
| 3337 | RGD1562550     | 1.61 | 9   | 0.91  | 9   | 1.46  |   |
| 3338 | AABR07052388.1 | 1.61 | 10  | 1.28  | 10  | 2.06  |   |
| 3339 | Pdzrn3         | 1.61 | 767 | 19.22 | 919 | 31.02 |   |
| 3340 | Tmem2          | 1.61 | 385 | 12.59 | 418 | 20.31 |   |
| 3341 | Sept10         | 1.61 | 87  | 6.69  | 93  | 10.79 |   |
| 3342 | Nsd1           | 1.61 | 585 | 13.12 | 681 | 21.14 |   |
| 3343 | Dnttip1        | 1.61 | 159 | 13.84 | 172 | 22.3  |   |

Supplemental Table 2  
Vehicle versus FSH, 24 hours

|      | A              | B    | C   | D      | E   | F      | G |
|------|----------------|------|-----|--------|-----|--------|---|
| 3344 | Sept6          | 1.61 | 80  | 4.47   | 89  | 7.2    |   |
| 3345 | Galt           | 1.61 | 85  | 14.11  | 93  | 22.72  |   |
| 3346 | Trappc9        | 1.61 | 237 | 5.93   | 235 | 9.54   |   |
| 3347 | Copg2          | 1.61 | 173 | 12.4   | 180 | 19.95  |   |
| 3348 | Cmtr2          | 1.61 | 28  | 2.72   | 31  | 4.38   |   |
| 3349 | Zfp715         | 1.61 | 47  | 4.57   | 52  | 7.34   |   |
| 3350 | Zbtb8os        | 1.61 | 56  | 7.19   | 63  | 11.56  |   |
| 3351 | Usp24          | 1.61 | 720 | 14.83  | 787 | 23.85  |   |
| 3352 | Pigs           | 1.61 | 265 | 25.81  | 286 | 41.49  |   |
| 3353 | Creld1         | 1.61 | 159 | 16.07  | 181 | 25.82  |   |
| 3354 | Hltf           | 1.61 | 69  | 2.92   | 75  | 4.69   |   |
| 3355 | Serac1         | 1.61 | 29  | 2.55   | 36  | 4.1    |   |
| 3356 | Slc52a2        | 1.61 | 39  | 3.2    | 48  | 5.13   |   |
| 3357 | AABR07029742.1 | 1.61 | 38  | 5.34   | 42  | 8.58   |   |
| 3358 | Supv3l1        | 1.61 | 108 | 7.32   | 116 | 11.76  |   |
| 3359 | Zfp426         | 1.61 | 47  | 3.47   | 50  | 5.57   |   |
| 3360 | Eif2ak3        | 1.61 | 147 | 5.83   | 146 | 9.35   |   |
| 3361 | Sh3tc2         | 1.6  | 277 | 8.28   | 307 | 13.29  |   |
| 3362 | Lta4h          | 1.6  | 116 | 11.85  | 124 | 19.01  |   |
| 3363 | Etfhd          | 1.6  | 108 | 8.62   | 110 | 13.82  |   |
| 3364 | Kdm4a          | 1.6  | 467 | 18.56  | 540 | 29.77  |   |
| 3365 | Gorasp1        | 1.6  | 64  | 5.8    | 66  | 9.31   |   |
| 3366 | Prr14          | 1.6  | 30  | 8.72   | 42  | 13.98  |   |
| 3367 | Psmb3          | 1.6  | 313 | 96.46  | 342 | 154.67 |   |
| 3368 | Slc35c2        | 1.6  | 30  | 8.16   | 31  | 13.07  |   |
| 3369 | Zfp719         | 1.6  | 58  | 4.46   | 66  | 7.15   |   |
| 3370 | Taf6           | 1.6  | 173 | 13.93  | 189 | 22.32  |   |
| 3371 | Bad            | 1.6  | 77  | 14.69  | 80  | 23.51  |   |
| 3372 | Fech           | 1.6  | 93  | 5.8    | 106 | 9.28   |   |
| 3373 | Kdelc1         | 1.6  | 77  | 8.69   | 93  | 13.9   |   |
| 3374 | Aspscr1        | 1.6  | 111 | 9.75   | 122 | 15.61  |   |
| 3375 | Nsf            | 1.6  | 143 | 7.87   | 169 | 12.59  |   |
| 3376 | Prcc           | 1.6  | 214 | 19     | 230 | 30.39  |   |
| 3377 | Fam110a        | 1.6  | 25  | 2.16   | 30  | 3.46   |   |
| 3378 | Pde6d          | 1.6  | 94  | 8.7    | 109 | 13.91  |   |
| 3379 | RGD1306215     | 1.6  | 16  | 9.7    | 25  | 15.5   |   |
| 3380 | Tlcd1          | 1.6  | 13  | 1.19   | 17  | 1.9    |   |
| 3381 | Zfp286a        | 1.6  | 11  | 0.81   | 14  | 1.29   |   |
| 3382 | 2610015P09Rik  | 1.6  | 28  | 0.75   | 46  | 1.19   |   |
| 3383 | AABR07001923.1 | 1.6  | 10  | 1.33   | 11  | 2.12   |   |
| 3384 | Arid3a         | 1.6  | 4   | 0.55   | 9   | 0.88   |   |
| 3385 | Large          | 1.6  | 201 | 6.86   | 188 | 10.96  |   |
| 3386 | Mrpl3          | 1.6  | 154 | 16.64  | 158 | 26.6   |   |
| 3387 | Osgepl1        | 1.6  | 61  | 2.77   | 42  | 4.43   |   |
| 3388 | SNORD22_1      | 1.6  | 28  | 59.33  | 32  | 94.83  |   |
| 3389 | Tmem185b       | 1.6  | 39  | 9.46   | 44  | 15.13  |   |
| 3390 | Ptprs          | 1.6  | 892 | 33.29  | 968 | 53.2   |   |
| 3391 | Prdx4          | 1.6  | 183 | 47.25  | 195 | 75.45  |   |
| 3392 | Orc5           | 1.6  | 108 | 7.67   | 113 | 12.24  |   |
| 3393 | Atf7ip         | 1.6  | 234 | 12.24  | 253 | 19.54  |   |
| 3394 | Cox7c          | 1.6  | 277 | 138.78 | 321 | 221.52 |   |
| 3395 | Ube3b          | 1.6  | 323 | 20.72  | 353 | 33.07  |   |
| 3396 | Tgoln2         | 1.6  | 428 | 22.63  | 464 | 36.11  |   |
| 3397 | LOC691920      | 1.6  | 156 | 1.72   | 165 | 2.74   |   |

Supplemental Table 2  
Vehicle versus FSH, 24 hours

|      | A              | B    | C   | D     | E   | F      | G |
|------|----------------|------|-----|-------|-----|--------|---|
| 3398 | Map2k5         | 1.6  | 147 | 5.54  | 128 | 8.85   |   |
| 3399 | Rev3l          | 1.6  | 209 | 3.52  | 217 | 5.61   |   |
| 3400 | Tbc1d24        | 1.6  | 56  | 3.36  | 75  | 5.36   |   |
| 3401 | Trappc13       | 1.6  | 218 | 20.42 | 219 | 32.58  |   |
| 3402 | Hid1           | 1.6  | 99  | 6.61  | 107 | 10.54  |   |
| 3403 | Dtx3           | 1.59 | 117 | 13.07 | 120 | 20.83  |   |
| 3404 | Eftud2         | 1.59 | 369 | 25.46 | 407 | 40.59  |   |
| 3405 | Wdr92          | 1.59 | 20  | 3.75  | 30  | 5.98   |   |
| 3406 | E2f3           | 1.59 | 76  | 3.17  | 72  | 5.05   |   |
| 3407 | Kansl1l        | 1.59 | 100 | 2.6   | 78  | 4.14   |   |
| 3408 | Cers6          | 1.59 | 120 | 6.47  | 128 | 10.3   |   |
| 3409 | Mitf           | 1.59 | 123 | 2.5   | 127 | 3.99   |   |
| 3410 | Nr2c2          | 1.59 | 133 | 9.29  | 136 | 14.79  |   |
| 3411 | Nkap           | 1.59 | 30  | 4.19  | 30  | 6.67   |   |
| 3412 | Psmf1          | 1.59 | 125 | 18.9  | 135 | 30.09  |   |
| 3413 | Znfx1          | 1.59 | 143 | 2.89  | 133 | 4.61   |   |
| 3414 | Neu1           | 1.59 | 111 | 11.08 | 121 | 17.62  |   |
| 3415 | Cog2           | 1.59 | 153 | 10.71 | 145 | 17.03  |   |
| 3416 | Zbtb12         | 1.59 | 32  | 3.31  | 36  | 5.26   |   |
| 3417 | Stat1          | 1.59 | 232 | 6.32  | 232 | 10.04  |   |
| 3418 | Ext2           | 1.59 | 706 | 56.75 | 773 | 90.14  |   |
| 3419 | Epn2           | 1.59 | 456 | 19.07 | 511 | 30.28  |   |
| 3420 | Arl5a          | 1.59 | 171 | 11.31 | 172 | 17.96  |   |
| 3421 | Phf1           | 1.59 | 132 | 8.68  | 127 | 13.78  |   |
| 3422 | Tecpr2         | 1.59 | 97  | 2.98  | 105 | 4.73   |   |
| 3423 | Tp53i11        | 1.59 | 287 | 24.13 | 308 | 38.3   |   |
| 3424 | Chmp1a         | 1.59 | 200 | 19.38 | 211 | 30.75  |   |
| 3425 | Tyk2           | 1.59 | 111 | 4.29  | 116 | 6.8    |   |
| 3426 | Ctsb           | 1.59 | 767 | 96.48 | 849 | 153.07 |   |
| 3427 | Ip6k1          | 1.59 | 247 | 32.62 | 267 | 51.72  |   |
| 3428 | Adrb2          | 1.59 | 11  | 1.34  | 11  | 2.13   |   |
| 3429 | Ifi30          | 1.59 | 69  | 13.02 | 78  | 20.64  |   |
| 3430 | Ifi44          | 1.59 | 56  | 2.8   | 62  | 4.44   |   |
| 3431 | Ndufaf6        | 1.59 | 33  | 2.51  | 28  | 3.98   |   |
| 3432 | Nme7           | 1.59 | 60  | 5.9   | 63  | 9.35   |   |
| 3433 | Sec22c         | 1.59 | 22  | 3.02  | 21  | 4.78   |   |
| 3434 | Slc5a6         | 1.59 | 79  | 5.41  | 82  | 8.57   |   |
| 3435 | Spc25          | 1.59 | 19  | 2.19  | 17  | 3.47   |   |
| 3436 | Tll5           | 1.59 | 51  | 2.05  | 66  | 3.24   |   |
| 3437 | Arl16          | 1.59 | 35  | 8.96  | 34  | 14.2   |   |
| 3438 | Fam220a        | 1.59 | 53  | 6.4   | 53  | 10.15  |   |
| 3439 | Rad54b         | 1.59 | 35  | 0.83  | 57  | 1.32   |   |
| 3440 | Rn60_20_0046.4 | 1.59 | 11  | 3.39  | 12  | 5.37   |   |
| 3441 | Setmar         | 1.59 | 11  | 1.14  | 17  | 1.81   |   |
| 3442 | Tbc1d20        | 1.58 | 286 | 35.99 | 273 | 57.02  |   |
| 3443 | Vps18          | 1.58 | 97  | 5.7   | 102 | 9.02   |   |
| 3444 | Mbd5           | 1.58 | 112 | 3.51  | 134 | 5.55   |   |
| 3445 | Pygb           | 1.58 | 412 | 14.78 | 431 | 23.4   |   |
| 3446 | Ubl3           | 1.58 | 248 | 19.79 | 258 | 31.3   |   |
| 3447 | Atg2a          | 1.58 | 188 | 6.68  | 196 | 10.57  |   |
| 3448 | Nynrin         | 1.58 | 117 | 4.57  | 122 | 7.22   |   |
| 3449 | Pigg           | 1.58 | 0   | 1.61  | 0   | 2.55   |   |
| 3450 | Rab43          | 1.58 | 58  | 8.82  | 54  | 13.95  |   |
| 3451 | Rpl31l4        | 1.58 | 2   | 19.52 | 2   | 30.87  |   |



Supplemental Table 2  
Vehicle versus FSH, 24 hours

|      | A               | B    | C    | D      | E    | F      | G |
|------|-----------------|------|------|--------|------|--------|---|
| 3452 | Mccc1           | 1.58 | 26   | 2.32   | 28   | 3.67   |   |
| 3453 | Tfap4           | 1.58 | 36   | 2.38   | 42   | 3.76   |   |
| 3454 | Lanc1           | 1.58 | 142  | 6.57   | 164  | 10.37  |   |
| 3455 | LOC100911440    | 1.58 | 0    | 2.36   | 0    | 3.73   |   |
| 3456 | Lgmn            | 1.58 | 40   | 4.4    | 41   | 6.93   |   |
| 3457 | Nova1           | 1.58 | 126  | 4.6    | 108  | 7.25   |   |
| 3458 | Zmiz2           | 1.58 | 9    | 3.99   | 3    | 6.3    |   |
| 3459 | Glis2           | 1.58 | 128  | 8.68   | 129  | 13.69  |   |
| 3460 | Cept1           | 1.58 | 98   | 6.93   | 108  | 10.93  |   |
| 3461 | Pvr11           | 1.57 | 176  | 7.41   | 179  | 11.67  |   |
| 3462 | Smpd1           | 1.57 | 327  | 34.86  | 350  | 54.88  |   |
| 3463 | Aox1            | 1.57 | 22   | 0.69   | 16   | 1.09   |   |
| 3464 | Kcnk3           | 1.57 | 16   | 0.65   | 17   | 1.02   |   |
| 3465 | Caskin2         | 1.57 | 118  | 5.52   | 121  | 8.68   |   |
| 3466 | Cirbp           | 1.57 | 132  | 17     | 149  | 26.76  |   |
| 3467 | ENSRNOG00000046 | 1.57 | 9    | 1.2    | 10   | 1.89   |   |
| 3468 | Hist3h2ba       | 1.57 | 9    | 4.75   | 5    | 7.47   |   |
| 3469 | Mgme1           | 1.57 | 13   | 1.46   | 13   | 2.3    |   |
| 3470 | St3gal3         | 1.57 | 134  | 7.43   | 119  | 11.7   |   |
| 3471 | Zfp394          | 1.57 | 40   | 3.64   | 43   | 5.74   |   |
| 3472 | Rbpms2          | 1.57 | 19   | 1.34   | 19   | 2.11   |   |
| 3473 | Nlk             | 1.57 | 234  | 6.35   | 236  | 9.99   |   |
| 3474 | Scp2            | 1.57 | 147  | 6.97   | 170  | 10.96  |   |
| 3475 | Spns1           | 1.57 | 92   | 8.32   | 110  | 13.09  |   |
| 3476 | LOC100912481    | 1.57 | 2    | 42.91  | 11   | 67.47  |   |
| 3477 | Eri3            | 1.57 | 289  | 29.98  | 377  | 47.13  |   |
| 3478 | RGD1306072      | 1.57 | 74   | 3.43   | 91   | 5.39   |   |
| 3479 | Klhdc3          | 1.57 | 245  | 27.98  | 268  | 43.95  |   |
| 3480 | Nup88           | 1.57 | 367  | 31.92  | 372  | 50.14  |   |
| 3481 | Adam9           | 1.57 | 215  | 14.98  | 230  | 23.52  |   |
| 3482 | Fbxl20          | 1.57 | 100  | 9.6    | 129  | 15.07  |   |
| 3483 | LOC100360638_2  | 1.57 | 44   | 6.24   | 52   | 9.79   |   |
| 3484 | Man2c1          | 1.57 | 207  | 13.39  | 231  | 21.03  |   |
| 3485 | Ndufaf1         | 1.57 | 29   | 3.27   | 31   | 5.13   |   |
| 3486 | Taf4b           | 1.57 | 43   | 1.57   | 41   | 2.47   |   |
| 3487 | Nmt2            | 1.57 | 259  | 18.54  | 264  | 29.08  |   |
| 3488 | Parm1           | 1.57 | 75   | 3.21   | 71   | 5.03   |   |
| 3489 | Ldah            | 1.57 | 84   | 5.76   | 100  | 9.03   |   |
| 3490 | Zfp821          | 1.57 | 179  | 8.11   | 147  | 12.72  |   |
| 3491 | Camk2g          | 1.57 | 209  | 6.21   | 213  | 9.74   |   |
| 3492 | Mettl22         | 1.57 | 61   | 6.93   | 59   | 10.87  |   |
| 3493 | Gpi             | 1.57 | 1033 | 115.43 | 1089 | 180.85 |   |
| 3494 | Atp6v0a1        | 1.57 | 898  | 39.94  | 926  | 62.56  |   |
| 3495 | Nfkb1           | 1.57 | 287  | 15.02  | 299  | 23.51  |   |
| 3496 | Dpf3            | 1.56 | 98   | 5.22   | 106  | 8.18   |   |
| 3497 | LOC100911660    | 1.56 | 0    | 1.27   | 0    | 1.99   |   |
| 3498 | Zbtb5           | 1.56 | 131  | 6.7    | 141  | 10.49  |   |
| 3499 | AABR07065420.1  | 1.56 | 13   | 1.11   | 12   | 1.74   |   |
| 3500 | Atg10           | 1.56 | 76   | 2.04   | 65   | 3.19   |   |
| 3501 | Cdk4            | 1.56 | 366  | 95.9   | 381  | 150.07 |   |
| 3502 | Cercam          | 1.56 | 17   | 1.19   | 15   | 1.86   |   |
| 3503 | Rcbtb2          | 1.56 | 98   | 7.78   | 121  | 12.17  |   |
| 3504 | Tmem179b        | 1.56 | 45   | 13.13  | 52   | 20.55  |   |
| 3505 | Capn1           | 1.56 | 325  | 24.87  | 349  | 38.93  |   |

Supplemental Table 2  
Vehicle versus FSH, 24 hours

|      | A              | B    | C   | D      | E    | F      | G |
|------|----------------|------|-----|--------|------|--------|---|
| 3506 | Mpg            | 1.56 | 20  | 2.67   | 31   | 4.18   |   |
| 3507 | Vps52          | 1.56 | 283 | 19.59  | 301  | 30.64  |   |
| 3508 | Cdc42bpg       | 1.56 | 75  | 2.76   | 75   | 4.31   |   |
| 3509 | Smarcal1       | 1.56 | 80  | 5.34   | 101  | 8.35   |   |
| 3510 | Kif16b         | 1.56 | 166 | 5.03   | 188  | 7.86   |   |
| 3511 | Creb3l2        | 1.56 | 477 | 29.93  | 492  | 46.78  |   |
| 3512 | Clptm1l        | 1.56 | 485 | 48.5   | 498  | 75.8   |   |
| 3513 | Zfp326         | 1.56 | 130 | 8.73   | 143  | 13.65  |   |
| 3514 | Tubgcp6        | 1.56 | 96  | 4.1    | 107  | 6.41   |   |
| 3515 | Wdr7           | 1.56 | 246 | 7.03   | 273  | 10.98  |   |
| 3516 | Lin37          | 1.56 | 46  | 9.99   | 48   | 15.6   |   |
| 3517 | Uck1           | 1.56 | 148 | 15.69  | 141  | 24.49  |   |
| 3518 | Epas1          | 1.56 | 983 | 47.92  | 1053 | 74.81  |   |
| 3519 | Ap1s2          | 1.56 | 68  | 3.07   | 64   | 4.79   |   |
| 3520 | Coq9           | 1.56 | 133 | 15.78  | 128  | 24.63  |   |
| 3521 | Ift22          | 1.56 | 30  | 4.26   | 32   | 6.65   |   |
| 3522 | Ddx28          | 1.56 | 26  | 3.48   | 29   | 5.44   |   |
| 3523 | Mipep          | 1.56 | 70  | 5.47   | 71   | 8.54   |   |
| 3524 | Nsmce1         | 1.56 | 74  | 7.96   | 69   | 12.43  |   |
| 3525 | Ptcd1          | 1.56 | 58  | 4.35   | 67   | 6.8    |   |
| 3526 | AC105470.1     | 1.56 | 33  | 2.13   | 30   | 3.33   |   |
| 3527 | Arv1           | 1.56 | 91  | 7.25   | 91   | 11.3   |   |
| 3528 | Rnf216         | 1.56 | 361 | 11.78  | 419  | 18.35  |   |
| 3529 | Best1          | 1.56 | 51  | 3.82   | 50   | 5.95   |   |
| 3530 | Tmem132a       | 1.56 | 383 | 26.24  | 394  | 40.89  |   |
| 3531 | Mt-nd3         | 1.56 | 560 | 405.97 | 605  | 632.58 |   |
| 3532 | Man2b2         | 1.56 | 43  | 12.69  | 49   | 19.77  |   |
| 3533 | Por            | 1.56 | 254 | 22.79  | 269  | 35.49  |   |
| 3534 | RGD1307262     | 1.56 | 38  | 9.43   | 39   | 14.68  |   |
| 3535 | AABR07053185.1 | 1.56 | 25  | 3.04   | 20   | 4.73   |   |
| 3536 | Alkbh4         | 1.56 | 34  | 3.66   | 35   | 5.7    |   |
| 3537 | Ctsh           | 1.56 | 37  | 3.98   | 33   | 6.19   |   |
| 3538 | Ino80e         | 1.56 | 109 | 11.95  | 114  | 18.61  |   |
| 3539 | Rnf149         | 1.56 | 123 | 11.77  | 111  | 18.33  |   |
| 3540 | Agrn           | 1.56 | 215 | 6.69   | 243  | 10.42  |   |
| 3541 | Apoa1bp        | 1.56 | 62  | 15.2   | 68   | 23.66  |   |
| 3542 | Atg4c          | 1.56 | 28  | 2.55   | 35   | 3.97   |   |
| 3543 | Col23a1_2      | 1.56 | 8   | 1.28   | 10   | 1.99   |   |
| 3544 | F11r           | 1.56 | 15  | 1.47   | 17   | 2.28   |   |
| 3545 | Tm6sf1         | 1.56 | 48  | 2.43   | 62   | 3.78   |   |
| 3546 | Cnpy3          | 1.56 | 121 | 15.53  | 125  | 24.16  |   |
| 3547 | Gbas           | 1.55 | 143 | 22.34  | 135  | 34.73  |   |
| 3548 | Ndor1          | 1.55 | 51  | 4.31   | 53   | 6.7    |   |
| 3549 | Nsun4_1        | 1.55 | 7   | 4.18   | 13   | 6.5    |   |
| 3550 | Tmco6          | 1.55 | 33  | 3.92   | 42   | 6.09   |   |
| 3551 | Pcnxl3         | 1.55 | 419 | 15.55  | 431  | 24.15  |   |
| 3552 | Bicap          | 1.55 | 117 | 15.07  | 125  | 23.4   |   |
| 3553 | Pofut1         | 1.55 | 157 | 10.14  | 167  | 15.74  |   |
| 3554 | Mcart1_2       | 1.55 | 122 | 16.02  | 139  | 24.87  |   |
| 3555 | Arhgap6        | 1.55 | 178 | 16.05  | 204  | 24.89  |   |
| 3556 | P3h1           | 1.55 | 503 | 45.67  | 525  | 70.85  |   |
| 3557 | Dnajc18        | 1.55 | 83  | 8.01   | 85   | 12.42  |   |
| 3558 | Homez          | 1.55 | 21  | 2.12   | 24   | 3.29   |   |
| 3559 | Ptprj          | 1.55 | 73  | 1.99   | 95   | 3.08   |   |

Supplemental Table 2  
Vehicle versus FSH, 24 hours

|      | A              | B    | C    | D      | E    | F      | G |
|------|----------------|------|------|--------|------|--------|---|
| 3560 | Zfp113         | 1.55 | 22   | 2.84   | 29   | 4.4    |   |
| 3561 | Acbd5          | 1.55 | 6    | 1.62   | 8    | 2.51   |   |
| 3562 | B4galt2        | 1.55 | 78   | 9.26   | 82   | 14.35  |   |
| 3563 | Bcdin3d        | 1.55 | 40   | 3.05   | 39   | 4.72   |   |
| 3564 | Sorcs2         | 1.55 | 25   | 0.58   | 26   | 0.89   |   |
| 3565 | Nomo1          | 1.55 | 2101 | 122.06 | 2240 | 189.01 |   |
| 3566 | Lpcat3         | 1.55 | 720  | 78.43  | 761  | 121.39 |   |
| 3567 | R3hcc1         | 1.55 | 94   | 10.77  | 96   | 16.66  |   |
| 3568 | Tmem198b       | 1.55 | 32   | 2.93   | 35   | 4.53   |   |
| 3569 | Ccdc104        | 1.55 | 56   | 5.38   | 54   | 8.32   |   |
| 3570 | Fastkd2        | 1.55 | 37   | 3.18   | 33   | 4.91   |   |
| 3571 | Hibch          | 1.55 | 51   | 3.97   | 50   | 6.14   |   |
| 3572 | Kxd1           | 1.55 | 108  | 12.97  | 105  | 20.06  |   |
| 3573 | Pml            | 1.55 | 150  | 10.24  | 149  | 15.85  |   |
| 3574 | Phc1           | 1.55 | 240  | 13.87  | 254  | 21.44  |   |
| 3575 | Fbxw5          | 1.55 | 167  | 16.76  | 188  | 25.92  |   |
| 3576 | Mlit10         | 1.55 | 249  | 10.69  | 239  | 16.52  |   |
| 3577 | Med14          | 1.54 | 417  | 19.37  | 452  | 29.92  |   |
| 3578 | Rbck1          | 1.54 | 258  | 20.97  | 254  | 32.38  |   |
| 3579 | Tpp1           | 1.54 | 344  | 33.79  | 365  | 52.18  |   |
| 3580 | Anapc2         | 1.54 | 422  | 34.11  | 423  | 52.67  |   |
| 3581 | Nmral1         | 1.54 | 34   | 6.55   | 39   | 10.12  |   |
| 3582 | RGD1563986     | 1.54 | 33   | 2.53   | 26   | 3.91   |   |
| 3583 | Bpgm           | 1.54 | 55   | 6.34   | 59   | 9.79   |   |
| 3584 | Dcp1b          | 1.54 | 68   | 3.94   | 64   | 6.09   |   |
| 3585 | Piga           | 1.54 | 36   | 1.28   | 25   | 1.98   |   |
| 3586 | Jagn1          | 1.54 | 123  | 23.9   | 126  | 36.88  |   |
| 3587 | Mbtps1         | 1.54 | 735  | 37.35  | 760  | 57.63  |   |
| 3588 | Tapbpl         | 1.54 | 94   | 10.7   | 95   | 16.51  |   |
| 3589 | Brix1          | 1.54 | 110  | 9.26   | 111  | 14.27  |   |
| 3590 | Zfp346         | 1.54 | 159  | 5.45   | 175  | 8.4    |   |
| 3591 | Atp9a          | 1.54 | 215  | 20.25  | 215  | 31.22  |   |
| 3592 | Cstf1          | 1.54 | 135  | 9.11   | 132  | 14.04  |   |
| 3593 | Dap            | 1.54 | 589  | 77.37  | 648  | 119.25 |   |
| 3594 | Ppard          | 1.54 | 50   | 1.46   | 49   | 2.25   |   |
| 3595 | Alg11          | 1.54 | 90   | 11.95  | 91   | 18.42  |   |
| 3596 | Ubiad1         | 1.54 | 92   | 6.03   | 98   | 9.28   |   |
| 3597 | Pias2          | 1.54 | 292  | 27.05  | 363  | 41.63  |   |
| 3598 | LOC100909771   | 1.54 | 0    | 2.22   | 1    | 3.41   |   |
| 3599 | Zfp949         | 1.54 | 29   | 1.38   | 25   | 2.12   |   |
| 3600 | AABR07027581.1 | 1.54 | 253  | 5.2    | 225  | 7.99   |   |
| 3601 | LOC100360638_1 | 1.54 | 15   | 1.82   | 17   | 2.8    |   |
| 3602 | Mettl3         | 1.54 | 219  | 15.54  | 204  | 23.91  |   |
| 3603 | Pex7           | 1.54 | 29   | 2.73   | 26   | 4.2    |   |
| 3604 | Ppp2r3c        | 1.54 | 68   | 4.89   | 59   | 7.53   |   |
| 3605 | Unc5c          | 1.54 | 27   | 0.45   | 28   | 0.7    |   |
| 3606 | Wash1          | 1.54 | 126  | 15.18  | 126  | 23.36  |   |
| 3607 | Blvra          | 1.54 | 20   | 3.82   | 22   | 5.88   |   |
| 3608 | Cep97          | 1.54 | 29   | 1.31   | 25   | 2.02   |   |
| 3609 | Pisd           | 1.54 | 164  | 20.63  | 166  | 31.75  |   |
| 3610 | Sp110          | 1.54 | 126  | 14.43  | 137  | 22.21  |   |
| 3611 | Tiam1          | 1.54 | 21   | 0.89   | 23   | 1.37   |   |
| 3612 | Cd81           | 1.54 | 1865 | 327.92 | 1913 | 504.21 |   |
| 3613 | Dhdds          | 1.54 | 167  | 8.56   | 173  | 13.15  |   |

Supplemental Table 2  
Vehicle versus FSH, 24 hours

|      | A            | B    | C    | D       | E    | F       | G |
|------|--------------|------|------|---------|------|---------|---|
| 3614 | Prmt2        | 1.54 | 210  | 19.69   | 192  | 30.26   |   |
| 3615 | Slc35a1      | 1.54 | 39   | 6.07    | 42   | 9.32    |   |
| 3616 | Tmem106b     | 1.54 | 123  | 11.3    | 142  | 17.36   |   |
| 3617 | Lama1        | 1.54 | 901  | 20.04   | 965  | 30.79   |   |
| 3618 | Wdtdc1       | 1.54 | 223  | 12.07   | 232  | 18.55   |   |
| 3619 | Uckl1        | 1.54 | 184  | 18.82   | 169  | 28.93   |   |
| 3620 | Pdpr         | 1.54 | 115  | 7.17    | 126  | 11.01   |   |
| 3621 | Bub3         | 1.54 | 207  | 17.57   | 216  | 26.99   |   |
| 3622 | Dph2         | 1.54 | 36   | 4.05    | 37   | 6.22    |   |
| 3623 | LOC103690024 | 1.54 | 5    | 14.66   | 3    | 22.51   |   |
| 3624 | Zfp444       | 1.54 | 198  | 8.48    | 199  | 13.02   |   |
| 3625 | Helz2        | 1.54 | 95   | 2.61    | 97   | 4.01    |   |
| 3626 | Rwdd4        | 1.53 | 103  | 7.66    | 101  | 11.76   |   |
| 3627 | Matr3        | 1.53 | 237  | 17.37   | 196  | 26.65   |   |
| 3628 | Dpp7         | 1.53 | 208  | 28.79   | 218  | 44.17   |   |
| 3629 | Acvr2a       | 1.53 | 60   | 3.96    | 59   | 6.07    |   |
| 3630 | C1d          | 1.53 | 59   | 2.76    | 55   | 4.24    |   |
| 3631 | Txndc16      | 1.53 | 32   | 1.82    | 29   | 2.8     |   |
| 3632 | Dhps         | 1.53 | 109  | 17.92   | 115  | 27.48   |   |
| 3633 | Nfatc2ip     | 1.53 | 23   | 2.07    | 21   | 3.18    |   |
| 3634 | Nme3         | 1.53 | 18   | 6.95    | 21   | 10.67   |   |
| 3635 | Fam149b1     | 1.53 | 206  | 11.71   | 198  | 17.96   |   |
| 3636 | Lman2l       | 1.53 | 165  | 8.28    | 160  | 12.69   |   |
| 3637 | Wbp1         | 1.53 | 1    | 10.48   | 0    | 16.06   |   |
| 3638 | Agpat3       | 1.53 | 252  | 8.38    | 241  | 12.85   |   |
| 3639 | Smg9         | 1.53 | 59   | 4.54    | 68   | 6.95    |   |
| 3640 | Zfp133       | 1.53 | 58   | 4.04    | 62   | 6.19    |   |
| 3641 | H3f3b_1      | 1.53 | 1090 | 164.4   | 1148 | 251.81  |   |
| 3642 | Gramd3       | 1.53 | 93   | 5.08    | 88   | 7.78    |   |
| 3643 | Rnf31        | 1.53 | 103  | 6.54    | 102  | 10.02   |   |
| 3644 | Mt-co2       | 1.53 | 4766 | 1744.52 | 5021 | 2668.93 |   |
| 3645 | Casp8        | 1.53 | 35   | 2.34    | 30   | 3.57    |   |
| 3646 | Dnmbp        | 1.53 | 94   | 3.12    | 98   | 4.77    |   |
| 3647 | RragB_1      | 1.53 | 0    | 1.21    | 0    | 1.85    |   |
| 3648 | LOC100910438 | 1.53 | 0    | 2.59    | 0    | 3.96    |   |
| 3649 | Tbccd1       | 1.53 | 51   | 3.67    | 48   | 5.62    |   |
| 3650 | Bfar         | 1.53 | 236  | 12.31   | 258  | 18.8    |   |
| 3651 | Lifr         | 1.53 | 111  | 4.49    | 118  | 6.85    |   |
| 3652 | Arid1b       | 1.53 | 565  | 14.25   | 645  | 21.76   |   |
| 3653 | Zscan21      | 1.53 | 180  | 13.36   | 171  | 20.41   |   |
| 3654 | Ahdc1        | 1.53 | 127  | 3.24    | 127  | 4.94    |   |
| 3655 | Srsf7        | 1.53 | 327  | 56.42   | 358  | 86.12   |   |
| 3656 | Pnrc2        | 1.53 | 203  | 23.24   | 224  | 35.46   |   |
| 3657 | Atmin_1      | 1.53 | 15   | 2.04    | 15   | 3.12    |   |
| 3658 | Pir          | 1.53 | 27   | 3.3     | 34   | 5.03    |   |
| 3659 | Prkd2        | 1.53 | 51   | 3.16    | 53   | 4.82    |   |
| 3660 | Rchy1        | 1.53 | 100  | 11.92   | 110  | 18.19   |   |
| 3661 | Rnpc3        | 1.53 | 91   | 6.68    | 98   | 10.19   |   |
| 3662 | Supt3h       | 1.53 | 28   | 5.56    | 44   | 8.48    |   |
| 3663 | Gnptab       | 1.53 | 226  | 10.31   | 247  | 15.73   |   |
| 3664 | Ivd          | 1.53 | 175  | 16.4    | 171  | 25.02   |   |
| 3665 | Tle1         | 1.53 | 171  | 7.74    | 133  | 11.81   |   |
| 3666 | Cnot10       | 1.52 | 137  | 10.38   | 133  | 15.83   |   |
| 3667 | Mcm2         | 1.52 | 247  | 18.64   | 260  | 28.42   |   |

Supplemental Table 2  
Vehicle versus FSH, 24 hours

|      | A              | B    | C    | D       | E    | F      | G |
|------|----------------|------|------|---------|------|--------|---|
| 3668 | Mtg2           | 1.52 | 116  | 8.32    | 117  | 12.69  |   |
| 3669 | Zmat2          | 1.52 | 105  | 13.01   | 108  | 19.83  |   |
| 3670 | Jarid2         | 1.52 | 123  | 4.83    | 135  | 7.37   |   |
| 3671 | Lemd3          | 1.52 | 103  | 6.55    | 105  | 9.98   |   |
| 3672 | Ppp2r5c        | 1.52 | 430  | 30.74   | 455  | 46.85  |   |
| 3673 | Trappc4        | 1.52 | 63   | 11.38   | 70   | 17.34  |   |
| 3674 | Uhrf1bp1       | 1.52 | 205  | 7.67    | 189  | 11.68  |   |
| 3675 | Ctr9           | 1.52 | 366  | 18.29   | 373  | 27.85  |   |
| 3676 | Cep72          | 1.52 | 34   | 2.41    | 34   | 3.68   |   |
| 3677 | Fuca2          | 1.52 | 23   | 3.17    | 27   | 4.82   |   |
| 3678 | AABR07060519.1 | 1.52 | 25   | 2.34    | 23   | 3.56   |   |
| 3679 | Chkb           | 1.52 | 78   | 12.47   | 89   | 18.98  |   |
| 3680 | Gys1           | 1.52 | 190  | 11.34   | 187  | 17.26  |   |
| 3681 | Necap1         | 1.52 | 138  | 10.44   | 128  | 15.89  |   |
| 3682 | Pqbp1          | 1.52 | 152  | 13.18   | 195  | 20.06  |   |
| 3683 | Nup214         | 1.52 | 368  | 12.32   | 358  | 18.75  |   |
| 3684 | Gltscr1l       | 1.52 | 183  | 3.36    | 181  | 5.1    |   |
| 3685 | Soga1          | 1.52 | 340  | 12.57   | 368  | 19.13  |   |
| 3686 | Apool          | 1.52 | 63   | 7.6     | 58   | 11.56  |   |
| 3687 | Fbxo8          | 1.52 | 66   | 5.81    | 61   | 8.84   |   |
| 3688 | Fig4           | 1.52 | 108  | 4.92    | 113  | 7.48   |   |
| 3689 | Phykpl         | 1.52 | 0    | 1.17    | 0    | 1.77   |   |
| 3690 | Apex2          | 1.52 | 33   | 2.97    | 33   | 4.51   |   |
| 3691 | Dlgap1         | 1.52 | 109  | 1.11    | 149  | 1.68   |   |
| 3692 | Gpr89b         | 1.52 | 134  | 15.35   | 147  | 23.31  |   |
| 3693 | Lrig3          | 1.52 | 40   | 1.44    | 40   | 2.19   |   |
| 3694 | RGD1310712     | 1.52 | 173  | 8.57    | 179  | 13.01  |   |
| 3695 | Tspan3         | 1.52 | 375  | 54.8    | 385  | 83.23  |   |
| 3696 | Med23          | 1.52 | 225  | 9.38    | 216  | 14.25  |   |
| 3697 | Ubqln2         | 1.52 | 311  | 22.92   | 323  | 34.8   |   |
| 3698 | Mt-atp8        | 1.52 | 1572 | 1949.35 | 1634 | 2956.9 |   |
| 3699 | AABR07043829.2 | 1.52 | 49   | 3.79    | 50   | 5.75   |   |
| 3700 | Cdca7l         | 1.52 | 31   | 2.22    | 32   | 3.36   |   |
| 3701 | Cttnbp2        | 1.52 | 41   | 0.97    | 42   | 1.46   |   |
| 3702 | Pdcd2          | 1.52 | 29   | 5.05    | 43   | 7.66   |   |
| 3703 | P4htm          | 1.52 | 30   | 3.79    | 37   | 5.75   |   |
| 3704 | Socs2          | 1.52 | 211  | 24.37   | 244  | 36.95  |   |
| 3705 | LOC100363675   | 1.52 | 123  | 31.86   | 174  | 48.28  |   |
| 3706 | Mroh1          | 1.52 | 184  | 6.5     | 186  | 9.86   |   |
| 3707 | Cog4           | 1.52 | 214  | 12.58   | 211  | 19.06  |   |
| 3708 | Rnaseh2a       | 1.51 | 113  | 14.17   | 116  | 21.47  |   |
| 3709 | Tbce           | 1.51 | 212  | 10.58   | 203  | 16.03  |   |
| 3710 | Rhou           | 1.51 | 41   | 7.79    | 28   | 11.79  |   |
| 3711 | Zdhhc12        | 1.51 | 17   | 5.4     | 17   | 8.18   |   |
| 3712 | Acad9          | 1.51 | 111  | 9.23    | 115  | 13.96  |   |
| 3713 | Gps1           | 1.51 | 410  | 47.18   | 432  | 71.36  |   |
| 3714 | Tcta           | 1.51 | 61   | 7.21    | 55   | 10.91  |   |
| 3715 | Ogt            | 1.51 | 907  | 29.35   | 902  | 44.36  |   |
| 3716 | Calcll         | 1.51 | 122  | 5.3     | 119  | 8.01   |   |
| 3717 | Mri1           | 1.51 | 28   | 3.33    | 29   | 5.03   |   |
| 3718 | Ppp2ca         | 1.51 | 65   | 40.19   | 76   | 60.73  |   |
| 3719 | Wdr73          | 1.51 | 28   | 4.12    | 31   | 6.22   |   |
| 3720 | Map1lc3b       | 1.51 | 408  | 23.97   | 384  | 36.21  |   |
| 3721 | Tra2a          | 1.51 | 485  | 23.75   | 562  | 35.88  |   |

Supplemental Table 2  
Vehicle versus FSH, 24 hours

|      | A              | B    | C   | D      | E   | F      | G |
|------|----------------|------|-----|--------|-----|--------|---|
| 3722 | Myd88          | 1.51 | 56  | 5.17   | 52  | 7.81   |   |
| 3723 | Osbpl7         | 1.51 | 70  | 3      | 61  | 4.53   |   |
| 3724 | Sh3glb2        | 1.51 | 53  | 6.99   | 64  | 10.56  |   |
| 3725 | Suv420h2       | 1.51 | 115 | 7.96   | 129 | 12.01  |   |
| 3726 | Gramd1a        | 1.51 | 268 | 17.06  | 290 | 25.74  |   |
| 3727 | Zbtb48         | 1.51 | 38  | 2.92   | 34  | 4.41   |   |
| 3728 | Rara           | 1.51 | 179 | 11.39  | 191 | 17.18  |   |
| 3729 | Cdc37l1        | 1.51 | 128 | 4.5    | 123 | 6.78   |   |
| 3730 | Chst10         | 1.51 | 41  | 2.46   | 35  | 3.7    |   |
| 3731 | Timmdc1        | 1.51 | 73  | 10.32  | 81  | 15.54  |   |
| 3732 | Tle3           | 1.51 | 125 | 5.75   | 122 | 8.66   |   |
| 3733 | Osbpl11        | 1.51 | 163 | 6.85   | 150 | 10.31  |   |
| 3734 | Cstf2t         | 1.51 | 193 | 13.62  | 202 | 20.5   |   |
| 3735 | Rtfdc1         | 1.51 | 224 | 22.54  | 231 | 33.92  |   |
| 3736 | Foxp2          | 1.51 | 266 | 4.13   | 393 | 6.22   |   |
| 3737 | Pibf1          | 1.51 | 89  | 2.74   | 99  | 4.12   |   |
| 3738 | Mtfr1l         | 1.5  | 156 | 19.07  | 164 | 28.7   |   |
| 3739 | Rffl           | 1.5  | 42  | 1.75   | 50  | 2.63   |   |
| 3740 | AABR07002683.1 | 1.5  | 10  | 4.02   | 12  | 6.04   |   |
| 3741 | Atg12          | 1.5  | 189 | 16.9   | 191 | 25.4   |   |
| 3742 | Gpank1         | 1.5  | 36  | 4.66   | 33  | 7      |   |
| 3743 | Ppp1r16a       | 1.5  | 74  | 5.59   | 73  | 8.4    |   |
| 3744 | Pwwp2a         | 1.5  | 134 | 5.13   | 152 | 7.71   |   |
| 3745 | Anapc11        | 1.5  | 114 | 6.82   | 108 | 10.24  |   |
| 3746 | Ptchd1         | 1.5  | 39  | 1.16   | 36  | 1.74   |   |
| 3747 | Smarcb1        | 1.5  | 363 | 22.28  | 386 | 33.45  |   |
| 3748 | LOC100909856   | 1.5  | 5   | 2.87   | 7   | 4.3    |   |
| 3749 | Ndn            | 1.5  | 182 | 28.55  | 187 | 42.85  |   |
| 3750 | Plekhg5        | 1.5  | 39  | 1.92   | 38  | 2.88   |   |
| 3751 | Gpc4           | 1.5  | 635 | 52.28  | 660 | 78.4   |   |
| 3752 | Ring1          | 1.5  | 68  | 9.16   | 72  | 13.74  |   |
| 3753 | Snx11          | 1.5  | 72  | 5.55   | 79  | 8.31   |   |
| 3754 | Retsat         | 1.5  | 173 | 18.05  | 182 | 27.04  |   |
| 3755 | Tnrc6b         | 1.5  | 694 | 8.24   | 751 | 12.35  |   |
| 3756 | Fam120b        | 1.5  | 170 | 6.65   | 184 | 9.96   |   |
| 3757 | Nol8           | 1.5  | 1   | 1.78   | 3   | 2.67   |   |
| 3758 | Nubp1          | 1.5  | 110 | 17.7   | 95  | 26.49  |   |
| 3759 | Kdelr1         | 1.5  | 502 | 81.96  | 511 | 122.62 |   |
| 3760 | Bloc1s5        | 1.5  | 41  | 4.75   | 45  | 7.11   |   |
| 3761 | AY172581.19    | 1.5  | 67  | 245.55 | 68  | 367.32 |   |
| 3762 | Ogfod3         | 1.5  | 39  | 6.45   | 40  | 9.64   |   |
| 3763 | RGD1304587     | 1.5  | 40  | 6.7    | 36  | 10.02  |   |
| 3764 | Sufu           | 1.5  | 107 | 4.89   | 82  | 7.32   |   |
| 3765 | Ppp2r5e        | 1.5  | 256 | 8.24   | 302 | 12.32  |   |
| 3766 | Evi5           | 1.49 | 224 | 7.49   | 217 | 11.2   |   |
| 3767 | Rtn4ip1        | 1.49 | 50  | 2.91   | 49  | 4.35   |   |
| 3768 | Slx4ip         | 1.49 | 57  | 1.45   | 64  | 2.16   |   |
| 3769 | Inppl1         | 1.49 | 669 | 47.76  | 686 | 71.38  |   |
| 3770 | Sema4b         | 1.49 | 563 | 35.43  | 572 | 52.95  |   |
| 3771 | Rcn3           | 1.49 | 41  | 5.25   | 43  | 7.84   |   |
| 3772 | Arsk           | 1.49 | 44  | 2.89   | 42  | 4.32   |   |
| 3773 | Galk2          | 1.49 | 125 | 7.61   | 111 | 11.36  |   |
| 3774 | Parp8          | 1.49 | 116 | 7.54   | 126 | 11.26  |   |
| 3775 | Ap3b1          | 1.49 | 389 | 13.53  | 369 | 20.19  |   |

Supplemental Table 2  
Vehicle versus FSH, 24 hours

|      | A        | B    | C   | D     | E   | F      | G |
|------|----------|------|-----|-------|-----|--------|---|
| 3776 | Fem1a    | 1.49 | 147 | 16.69 | 151 | 24.91  |   |
| 3777 | Acaa1a   | 1.49 | 95  | 14.16 | 95  | 21.13  |   |
| 3778 | Fundc1   | 1.49 | 49  | 4.58  | 46  | 6.83   |   |
| 3779 | Dctd     | 1.49 | 50  | 3.71  | 53  | 5.53   |   |
| 3780 | Pias3    | 1.49 | 161 | 12.67 | 169 | 18.9   |   |
| 3781 | Plin3    | 1.49 | 442 | 71.89 | 466 | 107.22 |   |
| 3782 | Wdfy2    | 1.49 | 217 | 6.17  | 220 | 9.2    |   |
| 3783 | Ccdc77   | 1.49 | 58  | 3.89  | 64  | 5.8    |   |
| 3784 | Katna1   | 1.49 | 69  | 4.44  | 62  | 6.62   |   |
| 3785 | Pcdhgb7  | 1.49 | 33  | 3.91  | 38  | 5.83   |   |
| 3786 | Rab24    | 1.49 | 110 | 4.75  | 90  | 7.08   |   |
| 3787 | Dcaf7    | 1.49 | 323 | 13.66 | 325 | 20.37  |   |
| 3788 | Rilpl1   | 1.49 | 169 | 11.41 | 167 | 17.01  |   |
| 3789 | Dcbld1   | 1.49 | 65  | 6.41  | 67  | 9.56   |   |
| 3790 | Krba1    | 1.49 | 223 | 7.61  | 209 | 11.34  |   |
| 3791 | Prune    | 1.49 | 101 | 6.91  | 106 | 10.3   |   |
| 3792 | Cdh24    | 1.49 | 57  | 4.25  | 55  | 6.33   |   |
| 3793 | Cbx2     | 1.49 | 87  | 5.38  | 87  | 8.01   |   |
| 3794 | Slc35a3  | 1.49 | 91  | 10.48 | 93  | 15.61  |   |
| 3795 | Rnf144a  | 1.49 | 50  | 1.97  | 52  | 2.94   |   |
| 3796 | Nfkb2    | 1.49 | 87  | 6.82  | 86  | 10.14  |   |
| 3797 | Tmem201  | 1.49 | 171 | 5.52  | 140 | 8.21   |   |
| 3798 | Nat9     | 1.49 | 44  | 8.14  | 45  | 12.11  |   |
| 3799 | Adipor2  | 1.49 | 185 | 29.66 | 183 | 44.1   |   |
| 3800 | Itpkc    | 1.49 | 61  | 3.33  | 62  | 4.95   |   |
| 3801 | Ino80d   | 1.49 | 126 | 6.29  | 131 | 9.35   |   |
| 3802 | Ncoa2    | 1.49 | 222 | 10.08 | 226 | 14.98  |   |
| 3803 | Lzic     | 1.49 | 99  | 7.86  | 100 | 11.67  |   |
| 3804 | Clpp     | 1.49 | 48  | 13.69 | 51  | 20.34  |   |
| 3805 | Ilkap    | 1.49 | 207 | 16.61 | 177 | 24.67  |   |
| 3806 | Map4k2   | 1.49 | 50  | 2.77  | 50  | 4.12   |   |
| 3807 | Smim15   | 1.49 | 90  | 8.96  | 92  | 13.31  |   |
| 3808 | Trmt10c  | 1.49 | 47  | 4.28  | 47  | 6.35   |   |
| 3809 | Zdhhc7   | 1.49 | 144 | 12.74 | 146 | 18.93  |   |
| 3810 | Deaf1    | 1.49 | 182 | 10.7  | 166 | 15.88  |   |
| 3811 | Btbd2    | 1.48 | 129 | 15.37 | 120 | 22.81  |   |
| 3812 | Wdr11    | 1.48 | 204 | 9.66  | 203 | 14.33  |   |
| 3813 | Pus10    | 1.48 | 150 | 3     | 140 | 4.45   |   |
| 3814 | Tmem104  | 1.48 | 82  | 5.93  | 67  | 8.8    |   |
| 3815 | Luc7l3   | 1.48 | 278 | 17.58 | 248 | 26.09  |   |
| 3816 | Smim19   | 1.48 | 68  | 4.83  | 79  | 7.17   |   |
| 3817 | Cluap1   | 1.48 | 82  | 6.16  | 83  | 9.14   |   |
| 3818 | Pex2     | 1.48 | 69  | 7.52  | 66  | 11.15  |   |
| 3819 | Pcdhga10 | 1.48 | 49  | 5.06  | 50  | 7.5    |   |
| 3820 | Anxa11   | 1.48 | 401 | 37.36 | 393 | 55.35  |   |
| 3821 | Agpat4   | 1.48 | 528 | 33.38 | 471 | 49.44  |   |
| 3822 | Atpaf2   | 1.48 | 89  | 8.86  | 89  | 13.13  |   |
| 3823 | Gclc     | 1.48 | 200 | 12.77 | 187 | 18.91  |   |
| 3824 | Gtf3c6   | 1.48 | 55  | 8.31  | 56  | 12.3   |   |
| 3825 | Hp1bp3   | 1.48 | 629 | 35.9  | 611 | 53.16  |   |
| 3826 | Fam222b  | 1.48 | 207 | 6.5   | 179 | 9.63   |   |
| 3827 | Fto      | 1.48 | 408 | 14.42 | 414 | 21.34  |   |
| 3828 | Nrbp1    | 1.48 | 282 | 31    | 274 | 45.9   |   |
| 3829 | Alg5     | 1.48 | 68  | 9.45  | 71  | 13.98  |   |

Supplemental Table 2  
Vehicle versus FSH, 24 hours

|      | A              | B    | C    | D      | E    | F       | G |
|------|----------------|------|------|--------|------|---------|---|
| 3830 | Got1           | 1.48 | 131  | 13.47  | 136  | 19.93   |   |
| 3831 | R3hdm1         | 1.48 | 922  | 33.73  | 973  | 49.91   |   |
| 3832 | Slc39a9        | 1.48 | 271  | 11.24  | 258  | 16.62   |   |
| 3833 | Bicc1          | 1.48 | 314  | 13.65  | 322  | 20.18   |   |
| 3834 | Rrp1b          | 1.48 | 181  | 9.73   | 180  | 14.39   |   |
| 3835 | B4galt3        | 1.48 | 196  | 21.45  | 193  | 31.7    |   |
| 3836 | Kat6b          | 1.48 | 201  | 5.25   | 222  | 7.76    |   |
| 3837 | Pla2g12a       | 1.48 | 67   | 9.6    | 75   | 14.18   |   |
| 3838 | Eif2b4         | 1.48 | 69   | 9.55   | 70   | 14.1    |   |
| 3839 | Rap2a          | 1.48 | 76   | 4.82   | 71   | 7.11    |   |
| 3840 | Dnajb9         | 1.48 | 66   | 8.41   | 66   | 12.41   |   |
| 3841 | Nol6           | 1.47 | 212  | 9.73   | 211  | 14.34   |   |
| 3842 | Gpr180         | 1.47 | 182  | 10.1   | 174  | 14.89   |   |
| 3843 | Rabl6          | 1.47 | 398  | 27.18  | 403  | 40.07   |   |
| 3844 | Apbb3          | 1.47 | 77   | 7.23   | 78   | 10.65   |   |
| 3845 | Fkrp           | 1.47 | 70   | 6.25   | 66   | 9.21    |   |
| 3846 | Slc35a2        | 1.47 | 104  | 8.82   | 88   | 13      |   |
| 3847 | Coq2           | 1.47 | 81   | 10.1   | 97   | 14.88   |   |
| 3848 | Fam57a         | 1.47 | 103  | 17.44  | 93   | 25.69   |   |
| 3849 | Tmem200a_1     | 1.47 | 72   | 4.51   | 66   | 6.64    |   |
| 3850 | Ficn           | 1.47 | 196  | 12.1   | 188  | 17.82   |   |
| 3851 | Ezh1           | 1.47 | 95   | 4.46   | 82   | 6.57    |   |
| 3852 | Med20          | 1.47 | 94   | 9.67   | 89   | 14.24   |   |
| 3853 | Atp13a2        | 1.47 | 177  | 8.35   | 184  | 12.29   |   |
| 3854 | Dip2a          | 1.47 | 295  | 11.92  | 289  | 17.54   |   |
| 3855 | Mt-cytb        | 1.47 | 8026 | 1764   | 8112 | 2594.98 |   |
| 3856 | Hsd17b10       | 1.47 | 97   | 43.89  | 79   | 64.56   |   |
| 3857 | Sash1          | 1.47 | 88   | 3.25   | 98   | 4.79    |   |
| 3858 | Mogs           | 1.47 | 0    | 8.35   | 0    | 12.28   |   |
| 3859 | Syvn1          | 1.47 | 366  | 17.41  | 360  | 25.59   |   |
| 3860 | Dpy19l1        | 1.47 | 215  | 10.69  | 228  | 15.68   |   |
| 3861 | Nfatc3         | 1.47 | 341  | 12.54  | 360  | 18.4    |   |
| 3862 | Serinc1        | 1.47 | 470  | 72.6   | 489  | 106.46  |   |
| 3863 | Dhx16          | 1.47 | 99   | 5.27   | 91   | 7.73    |   |
| 3864 | Ppp1r12c       | 1.47 | 272  | 19.35  | 279  | 28.37   |   |
| 3865 | Dirc2          | 1.46 | 143  | 11.59  | 150  | 16.98   |   |
| 3866 | Wbp1l          | 1.46 | 477  | 23.35  | 529  | 34.2    |   |
| 3867 | Slc38a10       | 1.46 | 328  | 17.57  | 312  | 25.72   |   |
| 3868 | Sepn1          | 1.46 | 179  | 27.45  | 165  | 40.14   |   |
| 3869 | Heph           | 1.46 | 171  | 9.05   | 166  | 13.24   |   |
| 3870 | Atp13a1        | 1.46 | 356  | 20.44  | 352  | 29.88   |   |
| 3871 | Maged2         | 1.46 | 107  | 36.84  | 118  | 53.84   |   |
| 3872 | Me2            | 1.46 | 591  | 42.33  | 589  | 61.86   |   |
| 3873 | Nacc2          | 1.46 | 258  | 11.13  | 271  | 16.26   |   |
| 3874 | Tgif1          | 1.46 | 311  | 41.92  | 316  | 61.17   |   |
| 3875 | Dchs1          | 1.46 | 302  | 6.94   | 300  | 10.12   |   |
| 3876 | Ncstn          | 1.46 | 927  | 78.38  | 940  | 114.27  |   |
| 3877 | Txnip          | 1.46 | 1269 | 114.87 | 1276 | 167.44  |   |
| 3878 | Rere           | 1.46 | 961  | 18.14  | 933  | 26.41   |   |
| 3879 | Kif24          | 1.45 | 31   | 0.56   | 28   | 0.81    |   |
| 3880 | 4930452B06Rik  | 1.45 | 14   | 0.46   | 15   | 0.67    |   |
| 3881 | AABR07002674.1 | 1.45 | 1    | 0.46   | 1    | 0.66    |   |
| 3882 | AABR07002774.2 | 1.45 | 30   | 2.03   | 11   | 2.94    |   |
| 3883 | AABR07005506.1 | 1.45 | 1    | 1.71   | 2    | 2.48    |   |



Supplemental Table 2  
Vehicle versus FSH, 24 hours

|      | A              | B    | C  | D    | E  | F     | G |
|------|----------------|------|----|------|----|-------|---|
| 3884 | AABR07008940.1 | 1.45 | 0  | 1.46 | 0  | 2.13  |   |
| 3885 | AABR07012276.1 | 1.45 | 1  | 0.32 | 0  | 0.47  |   |
| 3886 | AABR07015889.1 | 1.45 | 0  | 0.77 | 0  | 1.12  |   |
| 3887 | AABR07020987.1 | 1.45 | 1  | 0.09 | 1  | 0.12  |   |
| 3888 | AABR07021759.1 | 1.45 | 0  | 0.53 | 0  | 0.77  |   |
| 3889 | AABR07024825.1 | 1.45 | 0  | 0.92 | 0  | 1.34  |   |
| 3890 | AABR07027511.1 | 1.45 | 0  | 0.66 | 0  | 0.95  |   |
| 3891 | AABR07027752.3 | 1.45 | 1  | 0.42 | 1  | 0.6   |   |
| 3892 | AABR07028009.1 | 1.45 | 1  | 0.33 | 0  | 0.48  |   |
| 3893 | AABR07028981.1 | 1.45 | 0  | 7.15 | 0  | 10.4  |   |
| 3894 | AABR07028989.1 | 1.45 | 5  | 0.12 | 3  | 0.18  |   |
| 3895 | AABR07032518.1 | 1.45 | 1  | 0.34 | 1  | 0.49  |   |
| 3896 | AABR07034750.1 | 1.45 | 2  | 0.46 | 1  | 0.67  |   |
| 3897 | AABR07035008.1 | 1.45 | 8  | 0.21 | 4  | 0.31  |   |
| 3898 | AABR07035412.2 | 1.45 | 9  | 0.49 | 9  | 0.71  |   |
| 3899 | AABR07036920.1 | 1.45 | 0  | 0.92 | 0  | 1.34  |   |
| 3900 | AABR07042077.1 | 1.45 | 1  | 0.1  | 1  | 0.14  |   |
| 3901 | AABR07042999.1 | 1.45 | 2  | 0.27 | 2  | 0.39  |   |
| 3902 | AABR07043564.1 | 1.45 | 9  | 0.17 | 24 | 0.25  |   |
| 3903 | AABR07044569.1 | 1.45 | 0  | 0.15 | 4  | 0.21  |   |
| 3904 | AABR07045399.2 | 1.45 | 1  | 0.21 | 2  | 0.31  |   |
| 3905 | AABR07047089.1 | 1.45 | 1  | 0.83 | 1  | 1.21  |   |
| 3906 | AABR07049038.1 | 1.45 | 2  | 1.42 | 3  | 2.06  |   |
| 3907 | AABR07051308.1 | 1.45 | 0  | 0.09 | 0  | 0.13  |   |
| 3908 | AABR07052085.1 | 1.45 | 2  | 0.6  | 2  | 0.88  |   |
| 3909 | AABR07052432.1 | 1.45 | 3  | 0.3  | 2  | 0.43  |   |
| 3910 | AABR07053837.1 | 1.45 | 2  | 1.47 | 2  | 2.14  |   |
| 3911 | AABR07055146.1 | 1.45 | 4  | 0.23 | 1  | 0.34  |   |
| 3912 | AABR07056013.1 | 1.45 | 1  | 0.31 | 1  | 0.45  |   |
| 3913 | AABR07056330.1 | 1.45 | 1  | 0.23 | 2  | 0.34  |   |
| 3914 | AABR07058514.2 | 1.45 | 0  | 0.94 | 0  | 1.37  |   |
| 3915 | AABR07059258.1 | 1.45 | 8  | 0.32 | 18 | 0.46  |   |
| 3916 | AABR07061328.1 | 1.45 | 3  | 0.09 | 3  | 0.14  |   |
| 3917 | AABR07061336.3 | 1.45 | 0  | 3.53 | 0  | 5.14  |   |
| 3918 | AABR07063459.1 | 1.45 | 1  | 0.68 | 1  | 0.98  |   |
| 3919 | AABR07063674.1 | 1.45 | 1  | 0.29 | 1  | 0.42  |   |
| 3920 | AABR07067034.1 | 1.45 | 2  | 0.73 | 1  | 1.06  |   |
| 3921 | AABR07070131.1 | 1.45 | 20 | 0.38 | 17 | 0.56  |   |
| 3922 | AABR07071904.2 | 1.45 | 1  | 0.59 | 0  | 0.86  |   |
| 3923 | AABR07072671.1 | 1.45 | 1  | 0.21 | 1  | 0.3   |   |
| 3924 | Aasdh          | 1.45 | 39 | 2.11 | 55 | 3.07  |   |
| 3925 | Abca17         | 1.45 | 4  | 0.05 | 4  | 0.07  |   |
| 3926 | Abca8a         | 1.45 | 5  | 0.09 | 3  | 0.13  |   |
| 3927 | Abcg4          | 1.45 | 4  | 0.26 | 2  | 0.37  |   |
| 3928 | AC106663.5     | 1.45 | 0  | 1.18 | 0  | 1.71  |   |
| 3929 | AC111831.2     | 1.45 | 3  | 1.58 | 3  | 2.3   |   |
| 3930 | AC118833.1     | 1.45 | 1  | 0.68 | 1  | 0.98  |   |
| 3931 | AC126897.1     | 1.45 | 1  | 0.38 | 0  | 0.56  |   |
| 3932 | AC128986.1     | 1.45 | 1  | 0.51 | 1  | 0.74  |   |
| 3933 | AC141344.2     | 1.45 | 0  | 0.83 | 0  | 1.21  |   |
| 3934 | Actr6          | 1.45 | 80 | 9.25 | 86 | 13.44 |   |
| 3935 | Ager           | 1.45 | 3  | 0.82 | 4  | 1.19  |   |
| 3936 | Aggf1          | 1.45 | 65 | 5.21 | 69 | 7.57  |   |
| 3937 | Aifm3          | 1.45 | 2  | 0.11 | 2  | 0.15  |   |

Supplemental Table 2  
Vehicle versus FSH, 24 hours

|      | A          | B    | C   | D     | E   | F      | G |
|------|------------|------|-----|-------|-----|--------|---|
| 3938 | Akr1c12l1  | 1.45 | 1   | 0.41  | 1   | 0.59   |   |
| 3939 | Akr1c2     | 1.45 | 1   | 0.18  | 1   | 0.26   |   |
| 3940 | Aldh3b2    | 1.45 | 1   | 0.23  | 1   | 0.33   |   |
| 3941 | Aldob      | 1.45 | 1   | 0.16  | 3   | 0.23   |   |
| 3942 | Ankrd66    | 1.45 | 4   | 0.43  | 4   | 0.63   |   |
| 3943 | Anxa13     | 1.45 | 11  | 0.31  | 4   | 0.45   |   |
| 3944 | Arhgap22   | 1.45 | 23  | 0.6   | 15  | 0.88   |   |
| 3945 | Ascl2      | 1.45 | 1   | 0.16  | 1   | 0.23   |   |
| 3946 | Atf7ip2    | 1.45 | 7   | 0.21  | 4   | 0.31   |   |
| 3947 | Atp10b     | 1.45 | 98  | 0.07  | 108 | 0.1    |   |
| 3948 | Atp6v0a4   | 1.45 | 14  | 0.31  | 12  | 0.45   |   |
| 3949 | Atp7b      | 1.45 | 16  | 0.29  | 10  | 0.42   |   |
| 3950 | AY172581.6 | 1.45 | 1   | 3.78  | 1   | 5.49   |   |
| 3951 | Bfsp1      | 1.45 | 1   | 0.12  | 2   | 0.17   |   |
| 3952 | Bmi1       | 1.45 | 28  | 5.76  | 29  | 8.37   |   |
| 3953 | Bmper      | 1.45 | 11  | 0.33  | 12  | 0.48   |   |
| 3954 | Btnl7_2    | 1.45 | 0   | 0.12  | 0   | 0.17   |   |
| 3955 | Cacna1g    | 1.45 | 10  | 0.06  | 14  | 0.09   |   |
| 3956 | Car12      | 1.45 | 9   | 0.48  | 7   | 0.7    |   |
| 3957 | Casz1      | 1.45 | 35  | 1.24  | 43  | 1.8    |   |
| 3958 | Catsper2   | 1.45 | 2   | 0.23  | 2   | 0.33   |   |
| 3959 | Cbr1_2     | 1.45 | 0   | 2.64  | 0   | 3.84   |   |
| 3960 | Ccdc15     | 1.45 | 44  | 2.08  | 47  | 3.03   |   |
| 3961 | Ccdc150    | 1.45 | 5   | 0.13  | 11  | 0.19   |   |
| 3962 | Ccdc177    | 1.45 | 1   | 0.12  | 1   | 0.17   |   |
| 3963 | Ccdc42b    | 1.45 | 2   | 0.3   | 1   | 0.43   |   |
| 3964 | Ccdc89     | 1.45 | 0   | 0.45  | 0   | 0.65   |   |
| 3965 | Cd33       | 1.45 | 1   | 0.27  | 1   | 0.39   |   |
| 3966 | Cd79a      | 1.45 | 3   | 0.74  | 3   | 1.07   |   |
| 3967 | Cdc25c     | 1.45 | 89  | 4.59  | 88  | 6.67   |   |
| 3968 | Cdh17      | 1.45 | 3   | 0.14  | 3   | 0.2    |   |
| 3969 | Ceacam10_2 | 1.45 | 0   | 0.34  | 0   | 0.5    |   |
| 3970 | Cetn3      | 1.45 | 1   | 2.11  | 0   | 3.07   |   |
| 3971 | Cfap53     | 1.45 | 26  | 0.73  | 22  | 1.06   |   |
| 3972 | Cfd        | 1.45 | 1   | 0.26  | 1   | 0.38   |   |
| 3973 | Chadl      | 1.45 | 1   | 0.11  | 1   | 0.16   |   |
| 3974 | Chrna7     | 1.45 | 15  | 1.08  | 16  | 1.56   |   |
| 3975 | Clca4l     | 1.45 | 3   | 0.09  | 4   | 0.13   |   |
| 3976 | Clcn1      | 1.45 | 6   | 0.08  | 3   | 0.11   |   |
| 3977 | Clec2dl1   | 1.45 | 43  | 0.46  | 37  | 0.67   |   |
| 3978 | Cnih2      | 1.45 | 3   | 0.56  | 7   | 0.82   |   |
| 3979 | Cntn5      | 1.45 | 16  | 0.07  | 15  | 0.11   |   |
| 3980 | Crls1      | 1.45 | 91  | 7.2   | 75  | 10.46  |   |
| 3981 | Cryl1      | 1.45 | 19  | 1.54  | 16  | 2.24   |   |
| 3982 | Cyp2e1     | 1.45 | 1   | 0.11  | 1   | 0.16   |   |
| 3983 | Dagla      | 1.45 | 10  | 0.4   | 13  | 0.59   |   |
| 3984 | Daglb      | 1.45 | 41  | 3.81  | 43  | 5.54   |   |
| 3985 | Ddn        | 1.45 | 1   | 0.07  | 1   | 0.1    |   |
| 3986 | Ddost      | 1.45 | 544 | 74.72 | 537 | 108.58 |   |
| 3987 | Ddx60      | 1.45 | 5   | 0.06  | 3   | 0.09   |   |
| 3988 | Disc1      | 1.45 | 22  | 0.1   | 8   | 0.14   |   |
| 3989 | Disp2      | 1.45 | 1   | 0.04  | 1   | 0.06   |   |
| 3990 | Dnajc5b    | 1.45 | 5   | 0.26  | 3   | 0.37   |   |
| 3991 | Dpysl5     | 1.45 | 2   | 0.05  | 3   | 0.07   |   |

Supplemental Table 2  
Vehicle versus FSH, 24 hours

|      | A               | B    | C   | D     | E   | F     | G |
|------|-----------------|------|-----|-------|-----|-------|---|
| 3992 | Echdc3          | 1.45 | 20  | 1.22  | 17  | 1.77  |   |
| 3993 | Efs             | 1.45 | 10  | 0.58  | 11  | 0.84  |   |
| 3994 | Emc9            | 1.45 | 5   | 0.07  | 1   | 0.1   |   |
| 3995 | Endog           | 1.45 | 8   | 2.12  | 7   | 3.08  |   |
| 3996 | ENSRNOG00000050 | 1.45 | 0   | 0.77  | 0   | 1.12  |   |
| 3997 | Fam96a          | 1.45 | 68  | 13.77 | 75  | 20.01 |   |
| 3998 | Fau             | 1.45 | 0   | 0.62  | 0   | 0.9   |   |
| 3999 | Fbln7           | 1.45 | 3   | 0.38  | 4   | 0.55  |   |
| 4000 | Fbxl15          | 1.45 | 4   | 0.74  | 4   | 1.08  |   |
| 4001 | Fcgr2b          | 1.45 | 11  | 0.07  | 10  | 0.1   |   |
| 4002 | Fgr             | 1.45 | 2   | 0.09  | 3   | 0.14  |   |
| 4003 | Flt1            | 1.45 | 32  | 0.04  | 10  | 0.05  |   |
| 4004 | Fmn1            | 1.45 | 16  | 0.18  | 22  | 0.26  |   |
| 4005 | Fmnl2           | 1.45 | 150 | 6.91  | 149 | 10.04 |   |
| 4006 | Foxo6           | 1.45 | 3   | 0.13  | 4   | 0.19  |   |
| 4007 | Fut7            | 1.45 | 1   | 0.11  | 0   | 0.16  |   |
| 4008 | Fxyd1           | 1.45 | 2   | 0.47  | 1   | 0.68  |   |
| 4009 | G6b             | 1.45 | 6   | 0.3   | 1   | 0.43  |   |
| 4010 | Gabra5          | 1.45 | 3   | 0.09  | 5   | 0.14  |   |
| 4011 | Gas2            | 1.45 | 1   | 0.1   | 4   | 0.14  |   |
| 4012 | Gdf9            | 1.45 | 6   | 1.08  | 6   | 1.57  |   |
| 4013 | Ggnbp1          | 1.45 | 2   | 0.17  | 2   | 0.25  |   |
| 4014 | Gle1            | 1.45 | 153 | 9.36  | 132 | 13.6  |   |
| 4015 | Gmnc            | 1.45 | 2   | 0.09  | 1   | 0.13  |   |
| 4016 | Gnao1           | 1.45 | 59  | 0.72  | 46  | 1.05  |   |
| 4017 | Gnptg           | 1.45 | 53  | 8.52  | 50  | 12.38 |   |
| 4018 | Grb7            | 1.45 | 1   | 0.09  | 2   | 0.13  |   |
| 4019 | Gxylt2          | 1.45 | 3   | 0.19  | 6   | 0.27  |   |
| 4020 | Hepacam         | 1.45 | 20  | 2.78  | 18  | 4.04  |   |
| 4021 | Hist1h2bd       | 1.45 | 0   | 0.65  | 0   | 0.95  |   |
| 4022 | Hist2h2aa2_1    | 1.45 | 0   | 0.63  | 0   | 0.92  |   |
| 4023 | Hmgb2l1         | 1.45 | 0   | 0.79  | 0   | 1.14  |   |
| 4024 | Hnf1a           | 1.45 | 3   | 0.07  | 1   | 0.1   |   |
| 4025 | Hoxc4           | 1.45 | 1   | 0.12  | 1   | 0.18  |   |
| 4026 | Hoxd4           | 1.45 | 2   | 0.09  | 2   | 0.13  |   |
| 4027 | Hprt1_1         | 1.45 | 0   | 1.9   | 0   | 2.76  |   |
| 4028 | Hrasls          | 1.45 | 1   | 0.08  | 2   | 0.12  |   |
| 4029 | Hs3st3a1        | 1.45 | 2   | 0.21  | 3   | 0.3   |   |
| 4030 | Hydin           | 1.45 | 9   | 0.02  | 11  | 0.02  |   |
| 4031 | Hykk            | 1.45 | 6   | 0.3   | 8   | 0.43  |   |
| 4032 | Hyls1           | 1.45 | 8   | 2.12  | 8   | 3.07  |   |
| 4033 | Il33            | 1.45 | 1   | 0.1   | 1   | 0.15  |   |
| 4034 | Inpp4b          | 1.45 | 16  | 0.05  | 10  | 0.08  |   |
| 4035 | Irak4           | 1.45 | 41  | 1.81  | 42  | 2.63  |   |
| 4036 | Isg20l2         | 1.45 | 63  | 12.08 | 58  | 17.55 |   |
| 4037 | Itgax           | 1.45 | 1   | 0.05  | 1   | 0.08  |   |
| 4038 | Izumo4          | 1.45 | 5   | 0.36  | 3   | 0.53  |   |
| 4039 | Khdrbs2         | 1.45 | 18  | 0.13  | 18  | 0.19  |   |
| 4040 | Klf17           | 1.45 | 0   | 0.13  | 1   | 0.18  |   |
| 4041 | Klhl10          | 1.45 | 5   | 0.25  | 6   | 0.36  |   |
| 4042 | Klhl30          | 1.45 | 3   | 0.28  | 3   | 0.4   |   |
| 4043 | Klrg2           | 1.45 | 14  | 0.21  | 6   | 0.31  |   |
| 4044 | Krt14           | 1.45 | 2   | 0.35  | 3   | 0.51  |   |
| 4045 | Lamb3           | 1.45 | 6   | 0.12  | 3   | 0.17  |   |

Supplemental Table 2  
Vehicle versus FSH, 24 hours

|      | A              | B    | C   | D    | E   | F     | G |
|------|----------------|------|-----|------|-----|-------|---|
| 4046 | Lipt1          | 1.45 | 9   | 0.82 | 10  | 1.18  |   |
| 4047 | Lmntd2         | 1.45 | 2   | 0.09 | 1   | 0.12  |   |
| 4048 | Lnpep          | 1.45 | 1   | 1.27 | 0   | 1.84  |   |
| 4049 | LOC100359912   | 1.45 | 0   | 0.11 | 0   | 0.16  |   |
| 4050 | LOC100360200   | 1.45 | 1   | 0.47 | 1   | 0.69  |   |
| 4051 | LOC100360432_1 | 1.45 | 0   | 1.49 | 0   | 2.17  |   |
| 4052 | LOC100361854   | 1.45 | 0   | 3.58 | 0   | 5.2   |   |
| 4053 | LOC100362344   | 1.45 | 0   | 0.43 | 0   | 0.62  |   |
| 4054 | LOC100362684   | 1.45 | 0   | 1.38 | 0   | 2.01  |   |
| 4055 | LOC100363289   | 1.45 | 5   | 0.4  | 3   | 0.58  |   |
| 4056 | LOC100364265   | 1.45 | 2   | 0.13 | 2   | 0.19  |   |
| 4057 | LOC100366054   | 1.45 | 0   | 0.2  | 2   | 0.29  |   |
| 4058 | LOC100910373   | 1.45 | 2   | 0.1  | 1   | 0.14  |   |
| 4059 | LOC100911034   | 1.45 | 0   | 0.36 | 1   | 0.52  |   |
| 4060 | LOC100911293   | 1.45 | 127 | 8.48 | 124 | 12.32 |   |
| 4061 | LOC100911776   | 1.45 | 0   | 0.39 | 0   | 0.57  |   |
| 4062 | LOC100911994   | 1.45 | 0   | 0.24 | 0   | 0.35  |   |
| 4063 | LOC100912537   | 1.45 | 0   | 0.98 | 0   | 1.42  |   |
| 4064 | LOC100912697   | 1.45 | 1   | 0.1  | 1   | 0.14  |   |
| 4065 | LOC102553012   | 1.45 | 4   | 0.41 | 4   | 0.6   |   |
| 4066 | LOC497899      | 1.45 | 1   | 0.23 | 1   | 0.33  |   |
| 4067 | LOC499770      | 1.45 | 48  | 5.53 | 35  | 8.04  |   |
| 4068 | LOC501406      | 1.45 | 7   | 0.83 | 4   | 1.2   |   |
| 4069 | LOC680528      | 1.45 | 1   | 0.47 | 1   | 0.69  |   |
| 4070 | LOC681380      | 1.45 | 1   | 0.62 | 0   | 0.91  |   |
| 4071 | LOC684828      | 1.45 | 1   | 0.38 | 1   | 0.55  |   |
| 4072 | LOC685081      | 1.45 | 0   | 0.16 | 1   | 0.23  |   |
| 4073 | LOC689991      | 1.45 | 4   | 0.02 | 9   | 0.04  |   |
| 4074 | LOC691083      | 1.45 | 7   | 0.27 | 11  | 0.39  |   |
| 4075 | LOC691153      | 1.45 | 1   | 0.16 | 1   | 0.24  |   |
| 4076 | LOC691422      | 1.45 | 13  | 1.66 | 13  | 2.42  |   |
| 4077 | Loxl4          | 1.45 | 4   | 0.17 | 4   | 0.25  |   |
| 4078 | Ltc4s          | 1.45 | 1   | 0.49 | 1   | 0.72  |   |
| 4079 | Map3k19        | 1.45 | 2   | 0.06 | 1   | 0.08  |   |
| 4080 | Mapk11         | 1.45 | 1   | 0.1  | 3   | 0.15  |   |
| 4081 | Masp2          | 1.45 | 53  | 1.11 | 59  | 1.61  |   |
| 4082 | Mast4_1        | 1.45 | 0   | 0.1  | 0   | 0.14  |   |
| 4083 | Mctp1          | 1.45 | 40  | 0.11 | 24  | 0.16  |   |
| 4084 | Metap1d        | 1.45 | 62  | 1.32 | 64  | 1.92  |   |
| 4085 | Metazoa_SRP_16 | 1.45 | 0   | 0.88 | 0   | 1.28  |   |
| 4086 | MGC116197      | 1.45 | 2   | 0.18 | 1   | 0.26  |   |
| 4087 | Mkrn2os        | 1.45 | 10  | 0.09 | 6   | 0.12  |   |
| 4088 | Mr1            | 1.45 | 6   | 0.41 | 16  | 0.6   |   |
| 4089 | Mtfp1          | 1.45 | 4   | 0.73 | 4   | 1.06  |   |
| 4090 | Mtus2          | 1.45 | 29  | 0.43 | 28  | 0.62  |   |
| 4091 | Mylk2          | 1.45 | 1   | 0.06 | 2   | 0.08  |   |
| 4092 | Myo16          | 1.45 | 8   | 0.04 | 11  | 0.05  |   |
| 4093 | Mzt1           | 1.45 | 22  | 3.15 | 16  | 4.58  |   |
| 4094 | Nat1           | 1.45 | 1   | 0.25 | 0   | 0.36  |   |
| 4095 | Ncf1           | 1.45 | 2   | 0.09 | 1   | 0.13  |   |
| 4096 | Nek4           | 1.45 | 43  | 2.52 | 38  | 3.67  |   |
| 4097 | Nhp2_1         | 1.45 | 0   | 6.73 | 0   | 9.79  |   |
| 4098 | Nme5           | 1.45 | 4   | 0.16 | 5   | 0.24  |   |
| 4099 | Nmrk1          | 1.45 | 18  | 0.44 | 7   | 0.64  |   |

Supplemental Table 2  
Vehicle versus FSH, 24 hours

|      | A            | B    | C  | D     | E  | F     | G |
|------|--------------|------|----|-------|----|-------|---|
| 4100 | Nr4a2        | 1.45 | 20 | 1.03  | 15 | 1.5   |   |
| 4101 | Oas1e        | 1.45 | 2  | 0.43  | 0  | 0.63  |   |
| 4102 | Oasl2        | 1.45 | 7  | 0.45  | 5  | 0.65  |   |
| 4103 | Obscn        | 1.45 | 6  | ##### | 5  | 0.01  |   |
| 4104 | Olr107       | 1.45 | 1  | 0.26  | 1  | 0.38  |   |
| 4105 | Olr1461      | 1.45 | 2  | 0.54  | 2  | 0.78  |   |
| 4106 | Ostm1        | 1.45 | 98 | 15.91 | 95 | 23.12 |   |
| 4107 | Otud7a       | 1.45 | 6  | 0.56  | 10 | 0.81  |   |
| 4108 | Pabpc4l      | 1.45 | 4  | 0.68  | 4  | 0.99  |   |
| 4109 | Panx3        | 1.45 | 4  | 0.31  | 3  | 0.45  |   |
| 4110 | Pars2        | 1.45 | 32 | 2.27  | 31 | 3.3   |   |
| 4111 | Pbsn_2       | 1.45 | 0  | 0.33  | 1  | 0.48  |   |
| 4112 | Pcdhb11      | 1.45 | 5  | 0.54  | 4  | 0.78  |   |
| 4113 | Pcsk4        | 1.45 | 11 | 0.51  | 19 | 0.74  |   |
| 4114 | Pex19_2      | 1.45 | 0  | 0.55  | 0  | 0.8   |   |
| 4115 | Pigo         | 1.45 | 71 | 4.9   | 68 | 7.13  |   |
| 4116 | Plcd4        | 1.45 | 12 | 0.09  | 5  | 0.13  |   |
| 4117 | Plcg2        | 1.45 | 2  | 0.13  | 7  | 0.19  |   |
| 4118 | Pld4         | 1.45 | 1  | 0.13  | 1  | 0.18  |   |
| 4119 | Plekhg6      | 1.45 | 7  | 0.21  | 6  | 0.31  |   |
| 4120 | Pls1         | 1.45 | 3  | 0.14  | 2  | 0.2   |   |
| 4121 | Pms2         | 1.45 | 82 | 4.26  | 79 | 6.19  |   |
| 4122 | Pnlcd1       | 1.45 | 3  | 0.11  | 6  | 0.17  |   |
| 4123 | Polr2m_2     | 1.45 | 0  | 0.23  | 0  | 0.33  |   |
| 4124 | Pou2f2       | 1.45 | 5  | 0.09  | 2  | 0.13  |   |
| 4125 | Pp2d1        | 1.45 | 47 | 2.1   | 31 | 3.05  |   |
| 4126 | Ppfibp2      | 1.45 | 13 | 0.38  | 15 | 0.55  |   |
| 4127 | Ppil6        | 1.45 | 7  | 0.53  | 8  | 0.76  |   |
| 4128 | Ppp1r14d     | 1.45 | 18 | 0.42  | 14 | 0.6   |   |
| 4129 | Primpol      | 1.45 | 19 | 1.14  | 13 | 1.66  |   |
| 4130 | Pspn         | 1.45 | 1  | 0.53  | 1  | 0.77  |   |
| 4131 | Ptpn18       | 1.45 | 3  | 0.36  | 2  | 0.53  |   |
| 4132 | Ptpn20       | 1.45 | 1  | 0.08  | 3  | 0.12  |   |
| 4133 | Rab17        | 1.45 | 2  | 0.16  | 1  | 0.23  |   |
| 4134 | Rab27a       | 1.45 | 16 | 1.02  | 16 | 1.49  |   |
| 4135 | Rac2         | 1.45 | 1  | 0.18  | 2  | 0.27  |   |
| 4136 | Rasd2        | 1.45 | 2  | 0.07  | 1  | 0.1   |   |
| 4137 | Rasl10a      | 1.45 | 1  | 0.2   | 1  | 0.29  |   |
| 4138 | Rbbp8nl      | 1.45 | 7  | 0.1   | 5  | 0.14  |   |
| 4139 | Rbm48        | 1.45 | 11 | 1.34  | 10 | 1.94  |   |
| 4140 | Rdh5         | 1.45 | 9  | 0.22  | 3  | 0.31  |   |
| 4141 | RGD1306441   | 1.45 | 1  | 0.22  | 1  | 0.32  |   |
| 4142 | RGD1306502   | 1.45 | 64 | 3.07  | 66 | 4.46  |   |
| 4143 | RGD1307554   | 1.45 | 89 | 5.05  | 89 | 7.34  |   |
| 4144 | RGD1310507   | 1.45 | 5  | 0.19  | 2  | 0.28  |   |
| 4145 | RGD1560860_2 | 1.45 | 1  | 0.14  | 1  | 0.21  |   |
| 4146 | RGD1562029   | 1.45 | 7  | 0.08  | 15 | 0.11  |   |
| 4147 | RGD1562409   | 1.45 | 0  | 4.65  | 0  | 6.76  |   |
| 4148 | RGD1563072_1 | 1.45 | 0  | 0.37  | 0  | 0.53  |   |
| 4149 | RGD1563145   | 1.45 | 0  | 0.39  | 0  | 0.57  |   |
| 4150 | RGD1564114   | 1.45 | 5  | 0.43  | 8  | 0.62  |   |
| 4151 | RGD1564463   | 1.45 | 0  | 0.14  | 4  | 0.21  |   |
| 4152 | RGD1565459   | 1.45 | 1  | 0.68  | 1  | 0.98  |   |
| 4153 | RGD1565844   | 1.45 | 3  | 0.79  | 2  | 1.14  |   |

Supplemental Table 2  
Vehicle versus FSH, 24 hours

|      | A              | B    | C  | D     | E  | F     | G |
|------|----------------|------|----|-------|----|-------|---|
| 4154 | Rgs6           | 1.45 | 15 | 0.04  | 21 | 0.06  |   |
| 4155 | Rgs8           | 1.45 | 3  | 0.05  | 1  | 0.07  |   |
| 4156 | Rn60_10_0698.6 | 1.45 | 0  | 1.58  | 0  | 2.3   |   |
| 4157 | Rn60_10_0891.3 | 1.45 | 1  | 0.32  | 2  | 0.46  |   |
| 4158 | Rn60_14_0866.3 | 1.45 | 0  | 0.62  | 0  | 0.91  |   |
| 4159 | Rn60_16_0001.1 | 1.45 | 1  | 0.3   | 1  | 0.43  |   |
| 4160 | Rn60_1_2448.1  | 1.45 | 1  | 0.17  | 1  | 0.25  |   |
| 4161 | Rn60_6_0565.1  | 1.45 | 1  | 0.27  | 1  | 0.4   |   |
| 4162 | Rn60_8_0402.1  | 1.45 | 0  | 0.43  | 1  | 0.63  |   |
| 4163 | Rn60_8_0909.1  | 1.45 | 1  | 0.38  | 0  | 0.55  |   |
| 4164 | RNase_MRP      | 1.45 | 30 | 27.48 | 30 | 39.93 |   |
| 4165 | Rnf125         | 1.45 | 3  | 0.18  | 1  | 0.26  |   |
| 4166 | Rnf24          | 1.45 | 7  | 4.79  | 6  | 6.96  |   |
| 4167 | Rnf32          | 1.45 | 13 | 0.32  | 11 | 0.46  |   |
| 4168 | Rpgrip1        | 1.45 | 13 | 0.14  | 18 | 0.2   |   |
| 4169 | Rpl38_2        | 1.45 | 0  | 3.51  | 0  | 5.1   |   |
| 4170 | Rps29_3        | 1.45 | 0  | 1.46  | 0  | 2.12  |   |
| 4171 | Rpusd2         | 1.45 | 0  | 0.32  | 0  | 0.47  |   |
| 4172 | Rpusd3         | 1.45 | 24 | 2.83  | 24 | 4.12  |   |
| 4173 | RT1-A3         | 1.45 | 8  | 1.73  | 8  | 2.52  |   |
| 4174 | Rttt           | 1.45 | 64 | 1.43  | 65 | 2.07  |   |
| 4175 | S100a1         | 1.45 | 11 | 2.62  | 6  | 3.81  |   |
| 4176 | Scd4           | 1.45 | 2  | 0.44  | 3  | 0.64  |   |
| 4177 | Scgb3a1        | 1.45 | 2  | 0.4   | 2  | 0.58  |   |
| 4178 | Sgk494         | 1.45 | 22 | 1.03  | 17 | 1.5   |   |
| 4179 | Sh2b2          | 1.45 | 19 | 0.71  | 11 | 1.03  |   |
| 4180 | Sh3rf1         | 1.45 | 93 | 2.56  | 92 | 3.72  |   |
| 4181 | Shisa6         | 1.45 | 14 | 0.32  | 12 | 0.46  |   |
| 4182 | Sidt1          | 1.45 | 1  | 0.04  | 2  | 0.06  |   |
| 4183 | Skor2          | 1.45 | 1  | 0.08  | 1  | 0.12  |   |
| 4184 | Slc12a8        | 1.45 | 12 | 0.1   | 6  | 0.14  |   |
| 4185 | Slc1a5         | 1.45 | 3  | 0.09  | 5  | 0.13  |   |
| 4186 | Slc25a14       | 1.45 | 14 | 0.97  | 22 | 1.41  |   |
| 4187 | Slc25a45       | 1.45 | 1  | 0.1   | 3  | 0.15  |   |
| 4188 | Slc35g1        | 1.45 | 14 | 2.48  | 16 | 3.61  |   |
| 4189 | Slc37a1        | 1.45 | 5  | 0.26  | 5  | 0.37  |   |
| 4190 | Slc5a9         | 1.45 | 1  | 0.05  | 2  | 0.07  |   |
| 4191 | Slfn1          | 1.45 | 12 | 0.29  | 3  | 0.42  |   |
| 4192 | SNORA43_6      | 1.45 | 14 | 41.22 | 15 | 59.89 |   |
| 4193 | SNORD113_26    | 1.45 | 0  | 2.62  | 0  | 3.81  |   |
| 4194 | SNORD14_3      | 1.45 | 0  | 17.38 | 0  | 25.26 |   |
| 4195 | Spata17        | 1.45 | 10 | 0.15  | 18 | 0.21  |   |
| 4196 | Srpk3          | 1.45 | 2  | 0.12  | 3  | 0.18  |   |
| 4197 | Ssmem1         | 1.45 | 1  | 0.15  | 4  | 0.21  |   |
| 4198 | St8sia5        | 1.45 | 4  | 0.17  | 4  | 0.24  |   |
| 4199 | Syk            | 1.45 | 4  | 0.05  | 1  | 0.07  |   |
| 4200 | Syt3           | 1.45 | 2  | 0.07  | 1  | 0.1   |   |
| 4201 | Tal2           | 1.45 | 1  | 0.21  | 6  | 0.31  |   |
| 4202 | Tasp1          | 1.45 | 33 | 0.82  | 23 | 1.2   |   |
| 4203 | Tatdn3         | 1.45 | 28 | 4.26  | 26 | 6.2   |   |
| 4204 | Tg             | 1.45 | 2  | 0.03  | 4  | 0.04  |   |
| 4205 | Tigd4          | 1.45 | 1  | 0.11  | 1  | 0.16  |   |
| 4206 | Tm4sf20        | 1.45 | 5  | 0.16  | 4  | 0.24  |   |
| 4207 | Tmem156        | 1.45 | 3  | 0.14  | 6  | 0.21  |   |

Supplemental Table 2  
Vehicle versus FSH, 24 hours

|      | A              | B    | C    | D     | E    | F     | G |
|------|----------------|------|------|-------|------|-------|---|
| 4208 | Tmem169        | 1.45 | 1    | 0.08  | 1    | 0.12  |   |
| 4209 | Tmem231        | 1.45 | 35   | 2.61  | 33   | 3.79  |   |
| 4210 | Tmem238        | 1.45 | 1    | 0.47  | 1    | 0.68  |   |
| 4211 | Tmem240        | 1.45 | 7    | 0.95  | 6    | 1.39  |   |
| 4212 | Tmem80         | 1.45 | 66   | 3.69  | 54   | 5.36  |   |
| 4213 | Tp53tg5        | 1.45 | 2    | 0.24  | 2    | 0.35  |   |
| 4214 | Tph1           | 1.45 | 3    | 0.19  | 3    | 0.28  |   |
| 4215 | Trim14         | 1.45 | 11   | 0.2   | 4    | 0.3   |   |
| 4216 | Trim17         | 1.45 | 14   | 1.02  | 26   | 1.48  |   |
| 4217 | Trim43a        | 1.45 | 2    | 0.37  | 2    | 0.53  |   |
| 4218 | Trmt1l         | 1.45 | 125  | 5.78  | 111  | 8.4   |   |
| 4219 | Tstd1          | 1.45 | 8    | 0.62  | 1    | 0.9   |   |
| 4220 | Ttc32          | 1.45 | 7    | 1.02  | 7    | 1.48  |   |
| 4221 | Ttc39b         | 1.45 | 26   | 1.21  | 26   | 1.76  |   |
| 4222 | UST4r          | 1.45 | 2274 | 0.12  | 2897 | 0.18  |   |
| 4223 | Vcam1          | 1.45 | 0    | 0.06  | 1    | 0.09  |   |
| 4224 | Wfdc11         | 1.45 | 1    | 0.21  | 1    | 0.3   |   |
| 4225 | Zbtb39         | 1.45 | 0    | 0.04  | 0    | 0.06  |   |
| 4226 | Zc3h12c        | 1.45 | 70   | 4.47  | 67   | 6.49  |   |
| 4227 | Zdbf2          | 1.45 | 20   | 0.41  | 18   | 0.6   |   |
| 4228 | Zfhx4          | 1.45 | 5    | 0.02  | 7    | 0.03  |   |
| 4229 | Zfp110         | 1.45 | 71   | 3.94  | 58   | 5.72  |   |
| 4230 | Zfp174         | 1.45 | 21   | 1.39  | 19   | 2.02  |   |
| 4231 | Zfp202         | 1.45 | 85   | 2.53  | 69   | 3.68  |   |
| 4232 | Zfp239         | 1.45 | 7    | 2.88  | 7    | 4.18  |   |
| 4233 | Zfp300         | 1.45 | 3    | 0.34  | 3    | 0.49  |   |
| 4234 | Zfp341         | 1.45 | 11   | 1.16  | 11   | 1.69  |   |
| 4235 | Zfp654         | 1.45 | 25   | 3.64  | 25   | 5.28  |   |
| 4236 | Zfp74_1        | 1.45 | 0    | 0.36  | 0    | 0.53  |   |
| 4237 | Zfp866_2       | 1.45 | 9    | 1.95  | 9    | 2.84  |   |
| 4238 | Zfp87          | 1.45 | 2    | 0.46  | 2    | 0.67  |   |
| 4239 | Zfp90          | 1.45 | 24   | 1.88  | 32   | 2.74  |   |
| 4240 | Znrf4          | 1.45 | 1    | 0.21  | 1    | 0.3   |   |
| 4241 | 5S_rRNA_188    | 1.45 | 0    | 10.47 | 0    | 15.21 |   |
| 4242 | 5S_rRNA_286    | 1.45 | 0    | 4.19  | 0    | 6.09  |   |
| 4243 | 7SK_111        | 1.45 | 0    | 0.78  | 0    | 1.14  |   |
| 4244 | 7SK_32         | 1.45 | 1    | 1.55  | 0    | 2.26  |   |
| 4245 | 7SK_66         | 1.45 | 0    | 1.54  | 0    | 2.24  |   |
| 4246 | A3galt2        | 1.45 | 5    | 0.39  | 4    | 0.57  |   |
| 4247 | AABR07000411.1 | 1.45 | 25   | 0.15  | 14   | 0.21  |   |
| 4248 | AABR07001591.1 | 1.45 | 4    | 0.37  | 4    | 0.54  |   |
| 4249 | AABR07002119.1 | 1.45 | 0    | 0.37  | 0    | 0.54  |   |
| 4250 | AABR07002623.2 | 1.45 | 30   | 19.25 | 28   | 27.98 |   |
| 4251 | AABR07003537.1 | 1.45 | 6    | 4.07  | 7    | 5.92  |   |
| 4252 | AABR07003751.1 | 1.45 | 4    | 0.48  | 2    | 0.7   |   |
| 4253 | AABR07006258.1 | 1.45 | 0    | 0.49  | 0    | 0.71  |   |
| 4254 | AABR07008097.1 | 1.45 | 1    | 0.21  | 0    | 0.3   |   |
| 4255 | AABR07008462.1 | 1.45 | 0    | 0.05  | 1    | 0.07  |   |
| 4256 | AABR07010144.1 | 1.45 | 0    | 0.06  | 0    | 0.08  |   |
| 4257 | AABR07010575.1 | 1.45 | 1    | 0.58  | 1    | 0.84  |   |
| 4258 | AABR07013464.1 | 1.45 | 1    | 0.12  | 3    | 0.17  |   |
| 4259 | AABR07014265.1 | 1.45 | 0    | 0.25  | 1    | 0.36  |   |
| 4260 | AABR07014272.1 | 1.45 | 1    | 0.25  | 1    | 0.36  |   |
| 4261 | AABR07014275.1 | 1.45 | 1    | 0.24  | 0    | 0.35  |   |

Supplemental Table 2  
Vehicle versus FSH, 24 hours

|      | A              | B    | C   | D     | E   | F     | G |
|------|----------------|------|-----|-------|-----|-------|---|
| 4262 | AABR07014974.1 | 1.45 | 2   | 1.57  | 2   | 2.28  |   |
| 4263 | AABR07015608.1 | 1.45 | 0   | 4.41  | 0   | 6.41  |   |
| 4264 | AABR07015956.1 | 1.45 | 21  | 2.56  | 19  | 3.72  |   |
| 4265 | AABR07016779.1 | 1.45 | 1   | 0.78  | 0   | 1.13  |   |
| 4266 | AABR07026557.2 | 1.45 | 10  | 0.17  | 4   | 0.24  |   |
| 4267 | AABR07026969.1 | 1.45 | 10  | 0.4   | 9   | 0.58  |   |
| 4268 | AABR07032255.1 | 1.45 | 0   | 0.7   | 0   | 1.01  |   |
| 4269 | AABR07035375.1 | 1.45 | 0   | 0.33  | 0   | 0.49  |   |
| 4270 | AABR07037356.1 | 1.45 | 1   | 0.21  | 2   | 0.31  |   |
| 4271 | AABR07040624.1 | 1.45 | 14  | 11.4  | 13  | 16.57 |   |
| 4272 | AABR07041709.1 | 1.45 | 1   | 0.17  | 2   | 0.24  |   |
| 4273 | AABR07042904.1 | 1.45 | 1   | 0.28  | 0   | 0.41  |   |
| 4274 | AABR07042937.1 | 1.45 | 0   | 1     | 0   | 1.45  |   |
| 4275 | AABR07044049.1 | 1.45 | 10  | 0.08  | 22  | 0.12  |   |
| 4276 | AABR07044362.1 | 1.45 | 15  | 0.7   | 12  | 1.02  |   |
| 4277 | AABR07045405.1 | 1.45 | 4   | 1.15  | 5   | 1.68  |   |
| 4278 | AABR07050487.1 | 1.45 | 3   | 0.1   | 3   | 0.15  |   |
| 4279 | AABR07052441.1 | 1.45 | 4   | 0.1   | 7   | 0.14  |   |
| 4280 | AABR07052458.1 | 1.45 | 2   | 0.29  | 1   | 0.42  |   |
| 4281 | AABR07054983.2 | 1.45 | 5   | 0.58  | 3   | 0.85  |   |
| 4282 | AABR07056200.1 | 1.45 | 1   | 0.14  | 1   | 0.2   |   |
| 4283 | AABR07058914.1 | 1.45 | 1   | 0.16  | 1   | 0.23  |   |
| 4284 | AABR07060291.1 | 1.45 | 1   | 3.61  | 1   | 5.25  |   |
| 4285 | AABR07061825.1 | 1.45 | 1   | 1.03  | 1   | 1.49  |   |
| 4286 | AABR07064099.1 | 1.45 | 0   | 0.61  | 0   | 0.88  |   |
| 4287 | AABR07067388.1 | 1.45 | 2   | 1.03  | 2   | 1.49  |   |
| 4288 | AABR07068030.1 | 1.45 | 0   | 0.85  | 0   | 1.23  |   |
| 4289 | AABR07068674.1 | 1.45 | 1   | 0.08  | 1   | 0.12  |   |
| 4290 | AABR07072639.1 | 1.45 | 6   | 0.79  | 5   | 1.15  |   |
| 4291 | Aatk           | 1.45 | 3   | 0.05  | 3   | 0.07  |   |
| 4292 | AC094421.1     | 1.45 | 0   | 0.52  | 0   | 0.75  |   |
| 4293 | AC097037.2     | 1.45 | 1   | 1.4   | 1   | 2.03  |   |
| 4294 | AC107446.2     | 1.45 | 0   | 0.28  | 0   | 0.4   |   |
| 4295 | AC120448.1     | 1.45 | 1   | 1.95  | 1   | 2.83  |   |
| 4296 | AC128792.2     | 1.45 | 17  | 1.51  | 3   | 2.19  |   |
| 4297 | AC128967.1     | 1.45 | 1   | 0.41  | 4   | 0.6   |   |
| 4298 | AC130391.2     | 1.45 | 0   | 1.81  | 0   | 2.62  |   |
| 4299 | AC135400.1     | 1.45 | 5   | 4.47  | 5   | 6.49  |   |
| 4300 | AC139445.1     | 1.45 | 0   | 0.15  | 0   | 0.22  |   |
| 4301 | AC139950.1     | 1.45 | 1   | 0.15  | 0   | 0.21  |   |
| 4302 | Acot13         | 1.45 | 19  | 1.63  | 11  | 2.37  |   |
| 4303 | Actl7b         | 1.45 | 3   | 0.54  | 3   | 0.78  |   |
| 4304 | Adam7          | 1.45 | 2   | 0.07  | 11  | 0.1   |   |
| 4305 | Adat1          | 1.45 | 24  | 0.94  | 31  | 1.36  |   |
| 4306 | Add2           | 1.45 | 268 | 0.06  | 296 | 0.08  |   |
| 4307 | Adgre1         | 1.45 | 6   | 0.08  | 4   | 0.11  |   |
| 4308 | Adora2b        | 1.45 | 2   | 0.13  | 9   | 0.2   |   |
| 4309 | Agmat          | 1.45 | 2   | 0.17  | 4   | 0.24  |   |
| 4310 | Agxt2          | 1.45 | 1   | 0.11  | 2   | 0.16  |   |
| 4311 | Alpl           | 1.45 | 8   | 0.61  | 9   | 0.89  |   |
| 4312 | Amz2           | 1.45 | 135 | 10.01 | 137 | 14.54 |   |
| 4313 | Ankrd16        | 1.45 | 42  | 1.34  | 25  | 1.95  |   |
| 4314 | Anlnl1         | 1.45 | 0   | 0.09  | 0   | 0.12  |   |
| 4315 | Aqp2           | 1.45 | 1   | 0.07  | 1   | 0.1   |   |



Supplemental Table 2  
Vehicle versus FSH, 24 hours

|      | A          | B    | C   | D    | E   | F     | G |
|------|------------|------|-----|------|-----|-------|---|
| 4316 | Arhgap30   | 1.45 | 4   | 0.07 | 3   | 0.1   |   |
| 4317 | Aurkb      | 1.45 | 45  | 2.32 | 43  | 3.37  |   |
| 4318 | AY172581.1 | 1.45 | 1   | 3.89 | 1   | 5.66  |   |
| 4319 | AY172581.5 | 1.45 | 1   | 3.66 | 1   | 5.32  |   |
| 4320 | B4galnt1   | 1.45 | 2   | 0.09 | 1   | 0.14  |   |
| 4321 | Bag5       | 1.45 | 0   | 0.29 | 0   | 0.43  |   |
| 4322 | Bpifb6     | 1.45 | 1   | 0.44 | 1   | 0.65  |   |
| 4323 | C4a_1      | 1.45 | 0   | 0.14 | 0   | 0.2   |   |
| 4324 | C5ar2      | 1.45 | 3   | 0.2  | 1   | 0.28  |   |
| 4325 | Cabyr      | 1.45 | 11  | 0.24 | 14  | 0.35  |   |
| 4326 | Cage1      | 1.45 | 6   | 0.09 | 7   | 0.13  |   |
| 4327 | Cby1       | 1.45 | 19  | 6.43 | 18  | 9.34  |   |
| 4328 | Ccdc101    | 1.45 | 55  | 7.47 | 58  | 10.86 |   |
| 4329 | Ccdc117    | 1.45 | 54  | 4.42 | 44  | 6.42  |   |
| 4330 | Ccdc180    | 1.45 | 6   | 0.05 | 1   | 0.07  |   |
| 4331 | Ccdc51     | 1.45 | 22  | 2.16 | 32  | 3.14  |   |
| 4332 | Ccdc64b    | 1.45 | 1   | 0.04 | 0   | 0.06  |   |
| 4333 | Ccdc71l    | 1.45 | 5   | 1.91 | 5   | 2.78  |   |
| 4334 | Ccdc88b    | 1.45 | 2   | 0.04 | 2   | 0.06  |   |
| 4335 | Ccnt1      | 1.45 | 27  | 8.63 | 27  | 12.54 |   |
| 4336 | Cd300a     | 1.45 | 1   | 0.25 | 2   | 0.37  |   |
| 4337 | Cd4        | 1.45 | 1   | 0.14 | 1   | 0.21  |   |
| 4338 | Cdh22      | 1.45 | 4   | 0.1  | 6   | 0.15  |   |
| 4339 | Cdh8       | 1.45 | 14  | 0.09 | 10  | 0.13  |   |
| 4340 | Cdkl2      | 1.45 | 17  | 0.82 | 19  | 1.2   |   |
| 4341 | Cep78      | 1.45 | 32  | 2.35 | 31  | 3.42  |   |
| 4342 | Cfap97     | 1.45 | 43  | 2.2  | 43  | 3.2   |   |
| 4343 | Chrn4      | 1.45 | 3   | 0.29 | 4   | 0.42  |   |
| 4344 | Chtop      | 1.45 | 0   | 0.31 | 0   | 0.45  |   |
| 4345 | Cideb      | 1.45 | 3   | 0.2  | 2   | 0.29  |   |
| 4346 | Clic5      | 1.45 | 12  | 0.36 | 18  | 0.53  |   |
| 4347 | Cmss1      | 1.45 | 2   | 0.51 | 5   | 0.75  |   |
| 4348 | Cnm1       | 1.45 | 8   | 0.36 | 8   | 0.52  |   |
| 4349 | Cnm4       | 1.45 | 78  | 3.73 | 76  | 5.42  |   |
| 4350 | Col11a2    | 1.45 | 2   | 0.04 | 1   | 0.06  |   |
| 4351 | Col15a1    | 1.45 | 0   | 0.06 | 0   | 0.09  |   |
| 4352 | Col6a1     | 1.45 | 4   | 0.24 | 4   | 0.35  |   |
| 4353 | Col6a6     | 1.45 | 3   | 0.07 | 7   | 0.11  |   |
| 4354 | Cox6a2     | 1.45 | 1   | 0.52 | 1   | 0.76  |   |
| 4355 | Crct1      | 1.45 | 2   | 1.64 | 2   | 2.39  |   |
| 4356 | Crhr2      | 1.45 | 1   | 0.08 | 2   | 0.12  |   |
| 4357 | Csmd3      | 1.45 | 27  | 0.33 | 36  | 0.47  |   |
| 4358 | Ctnnd2     | 1.45 | 24  | 0.05 | 14  | 0.08  |   |
| 4359 | Cyba       | 1.45 | 8   | 2.27 | 9   | 3.3   |   |
| 4360 | Cycs_2     | 1.45 | 0   | 1.57 | 0   | 2.28  |   |
| 4361 | Cyp2j10    | 1.45 | 319 | 0.38 | 176 | 0.56  |   |
| 4362 | Dab1       | 1.45 | 11  | 0.04 | 14  | 0.06  |   |
| 4363 | Dhrs7l1    | 1.45 | 29  | 0.09 | 25  | 0.13  |   |
| 4364 | Dnase1l2   | 1.45 | 3   | 0.6  | 2   | 0.87  |   |
| 4365 | Dusp9      | 1.45 | 1   | 0.1  | 1   | 0.14  |   |
| 4366 | Ebf1       | 1.45 | 12  | 0.07 | 13  | 0.11  |   |
| 4367 | Eid2       | 1.45 | 4   | 1.41 | 4   | 2.05  |   |
| 4368 | Eif3h_2    | 1.45 | 0   | 1.29 | 0   | 1.88  |   |
| 4369 | Eln        | 1.45 | 4   | 0.07 | 2   | 0.1   |   |

Supplemental Table 2  
Vehicle versus FSH, 24 hours

|      | A              | B    | C   | D     | E   | F     | G |
|------|----------------|------|-----|-------|-----|-------|---|
| 4370 | Fam105a        | 1.45 | 3   | 0.33  | 5   | 0.48  |   |
| 4371 | Fam124a        | 1.45 | 28  | 0.68  | 20  | 0.98  |   |
| 4372 | Fam83g         | 1.45 | 0   | 0.09  | 0   | 0.13  |   |
| 4373 | Fbxo5          | 1.45 | 33  | 3.15  | 33  | 4.58  |   |
| 4374 | Fdxacb1        | 1.45 | 33  | 3.27  | 32  | 4.75  |   |
| 4375 | Fggy           | 1.45 | 55  | 3.87  | 70  | 5.62  |   |
| 4376 | Fkbp1b         | 1.45 | 16  | 1.34  | 9   | 1.94  |   |
| 4377 | Fndc4          | 1.45 | 19  | 3.33  | 19  | 4.84  |   |
| 4378 | Fndc5          | 1.45 | 5   | 0.46  | 4   | 0.66  |   |
| 4379 | Foxp3          | 1.45 | 4   | 0.07  | 6   | 0.1   |   |
| 4380 | Fsd1           | 1.45 | 5   | 0.21  | 5   | 0.31  |   |
| 4381 | Fuom           | 1.45 | 1   | 0.11  | 0   | 0.16  |   |
| 4382 | Gcc1           | 1.45 | 76  | 5.36  | 76  | 7.79  |   |
| 4383 | Gcgr           | 1.45 | 2   | 0.13  | 2   | 0.19  |   |
| 4384 | Gcnt2          | 1.45 | 7   | 0.04  | 4   | 0.06  |   |
| 4385 | Ggct           | 1.45 | 11  | 1.43  | 10  | 2.08  |   |
| 4386 | Ggn            | 1.45 | 8   | 0.41  | 9   | 0.6   |   |
| 4387 | Gm5611         | 1.45 | 0   | 0.68  | 1   | 0.99  |   |
| 4388 | Gm9905         | 1.45 | 1   | 0.41  | 1   | 0.59  |   |
| 4389 | Gpihbp1        | 1.45 | 1   | 0.3   | 1   | 0.44  |   |
| 4390 | Gpr155         | 1.45 | 9   | 0.3   | 7   | 0.44  |   |
| 4391 | Gpr165         | 1.45 | 2   | 0.12  | 3   | 0.18  |   |
| 4392 | Grin2c         | 1.45 | 3   | 0.05  | 1   | 0.08  |   |
| 4393 | Gsto2_2        | 1.45 | 1   | 0.49  | 0   | 0.71  |   |
| 4394 | Guca2a         | 1.45 | 3   | 0.27  | 1   | 0.4   |   |
| 4395 | H1foo          | 1.45 | 2   | 0.43  | 2   | 0.63  |   |
| 4396 | Hbb            | 1.45 | 0   | 0.38  | 1   | 0.55  |   |
| 4397 | Hist1h4b_4     | 1.45 | 2   | 1.6   | 2   | 2.32  |   |
| 4398 | Hist2h2ac      | 1.45 | 0   | 0.66  | 1   | 0.96  |   |
| 4399 | Hist3h2bb      | 1.45 | 0   | 0.33  | 0   | 0.48  |   |
| 4400 | Hs6st2         | 1.45 | 21  | 0.25  | 20  | 0.37  |   |
| 4401 | Hs6st3         | 1.45 | 2   | 0.7   | 2   | 1.01  |   |
| 4402 | Ifit2          | 1.45 | 4   | 0.15  | 2   | 0.21  |   |
| 4403 | Igfbp3         | 1.45 | 3   | 0.21  | 3   | 0.3   |   |
| 4404 | Ina            | 1.45 | 2   | 0.05  | 1   | 0.08  |   |
| 4405 | Irf8           | 1.45 | 1   | 0.09  | 1   | 0.13  |   |
| 4406 | Irg1           | 1.45 | 1   | 0.1   | 2   | 0.15  |   |
| 4407 | Izumo1         | 1.45 | 2   | 0.17  | 1   | 0.25  |   |
| 4408 | Kcnd1          | 1.45 | 8   | 0.54  | 10  | 0.78  |   |
| 4409 | Kcnip3         | 1.45 | 5   | 0.4   | 8   | 0.58  |   |
| 4410 | Kcnj8          | 1.45 | 1   | 0.1   | 1   | 0.14  |   |
| 4411 | Kcnj9          | 1.45 | 3   | 0.2   | 3   | 0.29  |   |
| 4412 | Kcnv2          | 1.45 | 2   | 0.05  | 2   | 0.07  |   |
| 4413 | Kctd14         | 1.45 | 9   | 0.92  | 7   | 1.34  |   |
| 4414 | Kifc2          | 1.45 | 8   | 0.65  | 10  | 0.94  |   |
| 4415 | Kihl3          | 1.45 | 5   | 0.53  | 16  | 0.78  |   |
| 4416 | Klk5l_2        | 1.45 | 0   | 0.36  | 0   | 0.52  |   |
| 4417 | Lmo4           | 1.45 | 197 | 15.21 | 184 | 22.1  |   |
| 4418 | LOC100174910   | 1.45 | 35  | 2.08  | 35  | 3.02  |   |
| 4419 | LOC100360056_2 | 1.45 | 0   | 14.98 | 0   | 21.76 |   |
| 4420 | LOC100360499   | 1.45 | 0   | 1.22  | 0   | 1.77  |   |
| 4421 | LOC100361079   | 1.45 | 0   | 1.64  | 0   | 2.39  |   |
| 4422 | LOC100361475   | 1.45 | 0   | 1.16  | 0   | 1.68  |   |
| 4423 | LOC100361476   | 1.45 | 0   | 0.35  | 1   | 0.51  |   |

Supplemental Table 2  
Vehicle versus FSH, 24 hours

|      | A              | B    | C   | D     | E   | F     | G |
|------|----------------|------|-----|-------|-----|-------|---|
| 4424 | LOC100363068_1 | 1.45 | 0   | 1.12  | 0   | 1.63  |   |
| 4425 | LOC100909688   | 1.45 | 12  | 1.68  | 10  | 2.44  |   |
| 4426 | LOC100909776   | 1.45 | 1   | 0.25  | 3   | 0.36  |   |
| 4427 | LOC100910109   | 1.45 | 0   | 3.23  | 0   | 4.69  |   |
| 4428 | LOC100910152   | 1.45 | 2   | 5.16  | 3   | 7.5   |   |
| 4429 | LOC100910526_2 | 1.45 | 0   | 0.08  | 1   | 0.12  |   |
| 4430 | LOC102550729   | 1.45 | 2   | 3.89  | 2   | 5.66  |   |
| 4431 | LOC102555727   | 1.45 | 0   | 0.24  | 0   | 0.35  |   |
| 4432 | LOC678817      | 1.45 | 1   | 0.13  | 2   | 0.19  |   |
| 4433 | LOC681338      | 1.45 | 0   | 0.66  | 0   | 0.96  |   |
| 4434 | LOC684762      | 1.45 | 1   | 1.82  | 2   | 2.64  |   |
| 4435 | LOC685431_1    | 1.45 | 0   | 0.72  | 2   | 1.05  |   |
| 4436 | LOC687441      | 1.45 | 1   | 0.15  | 1   | 0.21  |   |
| 4437 | Lrrc46         | 1.45 | 3   | 0.59  | 4   | 0.86  |   |
| 4438 | Map6d1         | 1.45 | 1   | 0.19  | 2   | 0.27  |   |
| 4439 | Mapk10         | 1.45 | 12  | 0.09  | 7   | 0.13  |   |
| 4440 | Mat1a          | 1.45 | 4   | 0.15  | 2   | 0.22  |   |
| 4441 | Mcoln3         | 1.45 | 2   | 0.15  | 2   | 0.22  |   |
| 4442 | Mettl23        | 1.45 | 18  | 4.41  | 26  | 6.42  |   |
| 4443 | Mmp9           | 1.45 | 1   | 0.08  | 1   | 0.11  |   |
| 4444 | Mn1            | 1.45 | 2   | 0.06  | 5   | 0.09  |   |
| 4445 | Morn3          | 1.45 | 1   | 0.27  | 3   | 0.39  |   |
| 4446 | Mos            | 1.45 | 2   | 0.49  | 2   | 0.71  |   |
| 4447 | Mroh4          | 1.45 | 2   | 0.07  | 2   | 0.1   |   |
| 4448 | Mrps36_1       | 1.45 | 44  | 4.45  | 46  | 6.46  |   |
| 4449 | Murc           | 1.45 | 3   | 0.06  | 1   | 0.09  |   |
| 4450 | Myb            | 1.45 | 6   | 0.45  | 7   | 0.65  |   |
| 4451 | Myo5b          | 1.45 | 5   | 0.06  | 12  | 0.09  |   |
| 4452 | Nalcn          | 1.45 | 8   | 0.05  | 5   | 0.07  |   |
| 4453 | Nckap5         | 1.45 | 14  | 0.08  | 32  | 0.12  |   |
| 4454 | Nek1           | 1.45 | 57  | 1.6   | 57  | 2.33  |   |
| 4455 | Neu2           | 1.45 | 1   | 0.14  | 4   | 0.2   |   |
| 4456 | Neurl1b        | 1.45 | 4   | 0.3   | 3   | 0.44  |   |
| 4457 | Nfatc4         | 1.45 | 12  | 0.5   | 14  | 0.72  |   |
| 4458 | Nlrc3          | 1.45 | 7   | 0.07  | 11  | 0.11  |   |
| 4459 | Nlrp14         | 1.45 | 6   | 0.48  | 8   | 0.69  |   |
| 4460 | Nlrp4          | 1.45 | 2   | 0.07  | 1   | 0.1   |   |
| 4461 | Nox1           | 1.45 | 4   | 0.1   | 2   | 0.14  |   |
| 4462 | Nr2f1          | 1.45 | 3   | 0.1   | 2   | 0.15  |   |
| 4463 | Nrcam          | 1.45 | 1   | 0.03  | 2   | 0.05  |   |
| 4464 | Nxpe4_1        | 1.45 | 2   | 0.32  | 2   | 0.47  |   |
| 4465 | Odf4           | 1.45 | 2   | 0.17  | 2   | 0.25  |   |
| 4466 | Orc1           | 1.45 | 34  | 1.27  | 34  | 1.84  |   |
| 4467 | P3h3           | 1.45 | 298 | 30.28 | 309 | 44.01 |   |
| 4468 | Pak2_2         | 1.45 | 0   | 0.25  | 0   | 0.37  |   |
| 4469 | Parvb          | 1.45 | 11  | 0.46  | 12  | 0.67  |   |
| 4470 | Pcsk9          | 1.45 | 5   | 0.22  | 5   | 0.33  |   |
| 4471 | Pctp           | 1.45 | 11  | 1.04  | 12  | 1.51  |   |
| 4472 | Pcyt1b         | 1.45 | 18  | 0.75  | 11  | 1.09  |   |
| 4473 | Pdzd9          | 1.45 | 2   | 0.21  | 3   | 0.31  |   |
| 4474 | Phactr4        | 1.45 | 104 | 4.74  | 110 | 6.89  |   |
| 4475 | Pigc           | 1.45 | 1   | 3.64  | 0   | 5.29  |   |
| 4476 | Pigl           | 1.45 | 60  | 1.26  | 52  | 1.83  |   |
| 4477 | Pigv           | 1.45 | 62  | 3     | 64  | 4.37  |   |

Supplemental Table 2  
Vehicle versus FSH, 24 hours

|      | A              | B    | C   | D     | E   | F     | G |
|------|----------------|------|-----|-------|-----|-------|---|
| 4478 | Pkd112         | 1.45 | 3   | 0.03  | 5   | 0.05  |   |
| 4479 | Pkp1           | 1.45 | 4   | 0.05  | 2   | 0.08  |   |
| 4480 | Pla2r1         | 1.45 | 42  | 1.02  | 32  | 1.48  |   |
| 4481 | Plg            | 1.45 | 4   | 0.08  | 1   | 0.11  |   |
| 4482 | Polg2          | 1.45 | 20  | 1.73  | 18  | 2.51  |   |
| 4483 | Prkcz          | 1.45 | 8   | 0.14  | 6   | 0.2   |   |
| 4484 | Prrt2          | 1.45 | 1   | 0.1   | 2   | 0.15  |   |
| 4485 | Prrt3          | 1.45 | 4   | 0.33  | 4   | 0.48  |   |
| 4486 | Prss53         | 1.45 | 12  | 0.5   | 13  | 0.73  |   |
| 4487 | Psd4           | 1.45 | 1   | 0.05  | 4   | 0.08  |   |
| 4488 | Pttg1ip        | 1.45 | 756 | 70.75 | 751 | 102.8 |   |
| 4489 | Pwwp2b         | 1.45 | 23  | 1.23  | 20  | 1.78  |   |
| 4490 | Pygl           | 1.45 | 28  | 1.47  | 24  | 2.14  |   |
| 4491 | Rab6b          | 1.45 | 9   | 0.32  | 10  | 0.46  |   |
| 4492 | Rdm1           | 1.45 | 18  | 1.44  | 20  | 2.09  |   |
| 4493 | Rfc4           | 1.45 | 47  | 8     | 43  | 11.63 |   |
| 4494 | Rfxap_1        | 1.45 | 0   | 3.96  | 0   | 5.75  |   |
| 4495 | RGD1306186     | 1.45 | 1   | 0.13  | 3   | 0.19  |   |
| 4496 | RGD1306739     | 1.45 | 3   | 0.19  | 5   | 0.28  |   |
| 4497 | RGD1306746     | 1.45 | 72  | 4.92  | 74  | 7.15  |   |
| 4498 | RGD1308117     | 1.45 | 18  | 1.8   | 23  | 2.61  |   |
| 4499 | RGD1311251     | 1.45 | 1   | 0.18  | 2   | 0.26  |   |
| 4500 | RGD1359508     | 1.45 | 8   | 1.09  | 8   | 1.59  |   |
| 4501 | RGD1559972     | 1.45 | 0   | 1.73  | 0   | 2.51  |   |
| 4502 | RGD1560207     | 1.45 | 3   | 0.18  | 4   | 0.26  |   |
| 4503 | RGD1560436     | 1.45 | 7   | 0.92  | 8   | 1.34  |   |
| 4504 | RGD1561118     | 1.45 | 2   | 1.68  | 2   | 2.44  |   |
| 4505 | RGD1561636     | 1.45 | 0   | 1.17  | 0   | 1.7   |   |
| 4506 | RGD1563835     | 1.45 | 0   | 0.61  | 0   | 0.89  |   |
| 4507 | RGD1565415     | 1.45 | 2   | 1.11  | 1   | 1.62  |   |
| 4508 | RGD1565472     | 1.45 | 0   | 0.52  | 0   | 0.75  |   |
| 4509 | RGD1565767     | 1.45 | 2   | 0.81  | 2   | 1.18  |   |
| 4510 | RGD1566386     | 1.45 | 10  | 0.49  | 19  | 0.72  |   |
| 4511 | RGD735029      | 1.45 | 105 | 9.13  | 97  | 13.26 |   |
| 4512 | Rhebl1         | 1.45 | 6   | 1.05  | 7   | 1.53  |   |
| 4513 | Riiad1         | 1.45 | 3   | 0.56  | 7   | 0.81  |   |
| 4514 | Rn60_13_0847.2 | 1.45 | 0   | 0.35  | 0   | 0.51  |   |
| 4515 | Rn60_17_0453.2 | 1.45 | 6   | 0.12  | 10  | 0.17  |   |
| 4516 | Rn60_5_1607.1  | 1.45 | 3   | 1.18  | 2   | 1.72  |   |
| 4517 | Rn60_9_0975.2  | 1.45 | 2   | 0.61  | 2   | 0.88  |   |
| 4518 | Rn60_X_0646.2  | 1.45 | 3   | 0.42  | 2   | 0.62  |   |
| 4519 | Rnf113a1       | 1.45 | 0   | 1.54  | 0   | 2.24  |   |
| 4520 | Rnf8           | 1.45 | 78  | 4.19  | 59  | 6.09  |   |
| 4521 | Rpl5l1         | 1.45 | 2   | 1.68  | 4   | 2.44  |   |
| 4522 | Rrp36          | 1.45 | 31  | 7.15  | 27  | 10.39 |   |
| 4523 | Rtkn           | 1.45 | 0   | 0.19  | 0   | 0.28  |   |
| 4524 | Samd15         | 1.45 | 13  | 0.13  | 4   | 0.19  |   |
| 4525 | Sass6_2        | 1.45 | 8   | 1.5   | 10  | 2.18  |   |
| 4526 | Scn5a          | 1.45 | 5   | 0.03  | 5   | 0.04  |   |
| 4527 | Scn7a          | 1.45 | 3   | 0.15  | 4   | 0.21  |   |
| 4528 | Sec16b         | 1.45 | 6   | 0.29  | 7   | 0.42  |   |
| 4529 | Sema5b         | 1.45 | 7   | 0.3   | 7   | 0.44  |   |
| 4530 | Sept1          | 1.45 | 2   | 0.35  | 3   | 0.51  |   |
| 4531 | Serpib9d       | 1.45 | 1   | 0.23  | 2   | 0.33  |   |

Supplemental Table 2  
Vehicle versus FSH, 24 hours

|      | A          | B    | C   | D     | E   | F     | G |
|------|------------|------|-----|-------|-----|-------|---|
| 4532 | Sfrp2      | 1.45 | 1   | 0.11  | 1   | 0.15  |   |
| 4533 | Sfxn2      | 1.45 | 19  | 1.93  | 21  | 2.8   |   |
| 4534 | Sh3d21     | 1.45 | 8   | 0.26  | 7   | 0.38  |   |
| 4535 | Sh3pxd2b   | 1.45 | 16  | 0.54  | 10  | 0.79  |   |
| 4536 | Siglec1    | 1.45 | 1   | 0.03  | 1   | 0.05  |   |
| 4537 | Slc14a2_1  | 1.45 | 1   | 0.09  | 1   | 0.12  |   |
| 4538 | Slc16a11   | 1.45 | 3   | 0.26  | 2   | 0.38  |   |
| 4539 | Slc18b1    | 1.45 | 27  | 1.89  | 30  | 2.74  |   |
| 4540 | Slc25a48   | 1.45 | 1   | 0.27  | 1   | 0.39  |   |
| 4541 | Slc30a6    | 1.45 | 69  | 4.12  | 66  | 5.99  |   |
| 4542 | Slc35b4    | 1.45 | 175 | 9.97  | 164 | 14.49 |   |
| 4543 | Slc35e3    | 1.45 | 182 | 11.87 | 148 | 17.24 |   |
| 4544 | Smlr1      | 1.45 | 40  | 0.44  | 49  | 0.64  |   |
| 4545 | SNORA16_1  | 1.45 | 0   | 7.33  | 0   | 10.65 |   |
| 4546 | SNORA30_2  | 1.45 | 0   | 1.86  | 0   | 2.7   |   |
| 4547 | SNORA42_12 | 1.45 | 3   | 5.58  | 3   | 8.11  |   |
| 4548 | SNORA52_1  | 1.45 | 0   | 1.86  | 0   | 2.7   |   |
| 4549 | SNORD18_1  | 1.45 | 0   | 3.66  | 0   | 5.32  |   |
| 4550 | SNORD36_2  | 1.45 | 0   | 6.08  | 0   | 8.83  |   |
| 4551 | SNORD41    | 1.45 | 0   | 3.56  | 0   | 5.17  |   |
| 4552 | SNORD65_1  | 1.45 | 3   | 10.38 | 3   | 15.09 |   |
| 4553 | SNORD95_2  | 1.45 | 0   | 3.66  | 0   | 5.32  |   |
| 4554 | Sox5       | 1.45 | 280 | 5.9   | 263 | 8.57  |   |
| 4555 | Spata25    | 1.45 | 3   | 0.47  | 4   | 0.69  |   |
| 4556 | Spata33    | 1.45 | 29  | 0.89  | 17  | 1.3   |   |
| 4557 | Spc24      | 1.45 | 26  | 5.76  | 27  | 8.37  |   |
| 4558 | Srpx2      | 1.45 | 2   | 0.12  | 1   | 0.17  |   |
| 4559 | Stk32a     | 1.45 | 7   | 0.1   | 4   | 0.14  |   |
| 4560 | Stmn2      | 1.45 | 5   | 0.12  | 2   | 0.18  |   |
| 4561 | Strip2     | 1.45 | 3   | 0.1   | 3   | 0.14  |   |
| 4562 | Sumf2      | 1.45 | 61  | 5.8   | 59  | 8.43  |   |
| 4563 | Supt4h1    | 1.45 | 101 | 16.74 | 92  | 24.32 |   |
| 4564 | Syn1       | 1.45 | 119 | 0.31  | 114 | 0.46  |   |
| 4565 | Syt14      | 1.45 | 20  | 0.12  | 13  | 0.17  |   |
| 4566 | Tab1       | 1.45 | 134 | 9.43  | 140 | 13.7  |   |
| 4567 | Tcerg1l    | 1.45 | 9   | 0.14  | 5   | 0.2   |   |
| 4568 | Tdh        | 1.45 | 2   | 0.16  | 4   | 0.23  |   |
| 4569 | Tepp       | 1.45 | 23  | 0.79  | 23  | 1.15  |   |
| 4570 | Tex26      | 1.45 | 18  | 0.57  | 10  | 0.84  |   |
| 4571 | Thbs4      | 1.45 | 3   | 0.15  | 3   | 0.22  |   |
| 4572 | Tmc6       | 1.45 | 27  | 1.9   | 28  | 2.77  |   |
| 4573 | Tmem251    | 1.45 | 2   | 1.52  | 2   | 2.21  |   |
| 4574 | Tmem39b    | 1.45 | 86  | 6.9   | 87  | 10.03 |   |
| 4575 | Tmem74     | 1.45 | 1   | 0.27  | 1   | 0.39  |   |
| 4576 | Tshz2      | 1.45 | 51  | 4.16  | 51  | 6.05  |   |
| 4577 | Ttc39a     | 1.45 | 0   | 0.13  | 0   | 0.19  |   |
| 4578 | Tuba3a     | 1.45 | 1   | 0.16  | 1   | 0.24  |   |
| 4579 | Unc13a     | 1.45 | 13  | 0.43  | 12  | 0.63  |   |
| 4580 | Urad       | 1.45 | 1   | 0.49  | 1   | 0.71  |   |
| 4581 | Vgll4      | 1.45 | 194 | 20.39 | 182 | 29.63 |   |
| 4582 | Wdpcp      | 1.45 | 81  | 1.72  | 55  | 2.5   |   |
| 4583 | Wdr27      | 1.45 | 9   | 0.35  | 15  | 0.51  |   |
| 4584 | Wee2       | 1.45 | 4   | 0.15  | 12  | 0.22  |   |
| 4585 | Zc2hc1c    | 1.45 | 2   | 0.13  | 2   | 0.18  |   |

Supplemental Table 2  
Vehicle versus FSH, 24 hours

|      | A              | B    | C    | D      | E    | F      | G |
|------|----------------|------|------|--------|------|--------|---|
| 4586 | Zfp14          | 1.45 | 0    | 0.33   | 0    | 0.48   |   |
| 4587 | Zfp146         | 1.45 | 0    | 1.42   | 0    | 2.06   |   |
| 4588 | Zfp428         | 1.45 | 10   | 1.05   | 8    | 1.53   |   |
| 4589 | Zfp438         | 1.45 | 13   | 0.43   | 14   | 0.62   |   |
| 4590 | Zfp78          | 1.45 | 3    | 0.32   | 2    | 0.47   |   |
| 4591 | Zfp791         | 1.45 | 1    | 0.13   | 3    | 0.19   |   |
| 4592 | Zglp1          | 1.45 | 5    | 0.62   | 3    | 0.9    |   |
| 4593 | Zscan30        | 1.45 | 28   | 2.2    | 20   | 3.2    |   |
| 4594 | Lrp1           | 1.45 | 2893 | 48.53  | 2903 | 70.43  |   |
| 4595 | Riok3          | 1.45 | 545  | 21.01  | 530  | 30.43  |   |
| 4596 | Synj2bp        | 1.45 | 260  | 9.22   | 251  | 13.33  |   |
| 4597 | Atxn10         | 1.45 | 639  | 80.39  | 646  | 116.22 |   |
| 4598 | Ctdnep1        | 1.45 | 221  | 32.66  | 206  | 47.22  |   |
| 4599 | R3hdm4         | 1.45 | 63   | 23.12  | 89   | 33.42  |   |
| 4600 | Uhrf1          | 1.45 | 187  | 11.76  | 185  | 17     |   |
| 4601 | Ccar2          | 1.45 | 387  | 24.92  | 377  | 36.01  |   |
| 4602 | Psap           | 1.44 | 1338 | 127.2  | 1324 | 183.71 |   |
| 4603 | Tbc1d2b        | 1.44 | 192  | 6.59   | 183  | 9.52   |   |
| 4604 | Cdkn1b         | 1.44 | 197  | 19.59  | 177  | 28.26  |   |
| 4605 | Mbd1           | 1.44 | 258  | 13.94  | 225  | 20.11  |   |
| 4606 | Setd1b         | 1.44 | 156  | 5.74   | 149  | 8.28   |   |
| 4607 | H2afy2         | 1.44 | 172  | 17.6   | 192  | 25.39  |   |
| 4608 | Spg21          | 1.44 | 151  | 20.08  | 143  | 28.97  |   |
| 4609 | Dstyk          | 1.44 | 153  | 5.42   | 147  | 7.82   |   |
| 4610 | Limd2          | 1.44 | 131  | 28.07  | 127  | 40.48  |   |
| 4611 | Gna13          | 1.44 | 406  | 16.1   | 405  | 23.21  |   |
| 4612 | Npdc1          | 1.44 | 235  | 23.35  | 196  | 33.67  |   |
| 4613 | Zfp46          | 1.44 | 116  | 6.42   | 114  | 9.25   |   |
| 4614 | Trim5          | 1.44 | 167  | 9.66   | 182  | 13.91  |   |
| 4615 | Tsnax          | 1.44 | 276  | 23.43  | 264  | 33.74  |   |
| 4616 | Zfp862         | 1.44 | 138  | 7.69   | 139  | 11.06  |   |
| 4617 | Mapk8ip1       | 1.44 | 102  | 8.08   | 97   | 11.62  |   |
| 4618 | Lonrf2         | 1.44 | 417  | 14.13  | 406  | 20.32  |   |
| 4619 | C4a_2          | 1.44 | 7    | 4.11   | 10   | 5.91   |   |
| 4620 | Cd276          | 1.44 | 316  | 13.43  | 303  | 19.3   |   |
| 4621 | Poglut1        | 1.44 | 202  | 12.98  | 193  | 18.64  |   |
| 4622 | Dis3l2         | 1.44 | 201  | 6.72   | 242  | 9.65   |   |
| 4623 | Pex1           | 1.44 | 121  | 4.68   | 106  | 6.72   |   |
| 4624 | Ppp1r37        | 1.43 | 197  | 13.42  | 173  | 19.26  |   |
| 4625 | Rb1            | 1.43 | 174  | 6.13   | 155  | 8.8    |   |
| 4626 | Lsr            | 1.43 | 685  | 72.62  | 673  | 104.14 |   |
| 4627 | AABR07067267.1 | 1.43 | 26   | 6.97   | 29   | 10     |   |
| 4628 | Selo           | 1.43 | 155  | 15.19  | 182  | 21.78  |   |
| 4629 | Cnep1r1        | 1.43 | 123  | 16.52  | 100  | 23.69  |   |
| 4630 | Litaf          | 1.43 | 107  | 8.24   | 91   | 11.81  |   |
| 4631 | Ucp2           | 1.43 | 820  | 125.51 | 806  | 179.91 |   |
| 4632 | Jmjd8          | 1.43 | 56   | 8.03   | 51   | 11.51  |   |
| 4633 | Pigq           | 1.43 | 155  | 12.03  | 162  | 17.25  |   |
| 4634 | Qdpr           | 1.43 | 78   | 13.3   | 72   | 19.06  |   |
| 4635 | Thap11         | 1.43 | 71   | 9.73   | 70   | 13.94  |   |
| 4636 | Gtpbp1         | 1.43 | 174  | 13.27  | 160  | 19.01  |   |
| 4637 | Ppp1cc         | 1.43 | 596  | 50.39  | 575  | 72.18  |   |
| 4638 | Xiap           | 1.43 | 85   | 6.81   | 82   | 9.76   |   |
| 4639 | Mfge8          | 1.43 | 1882 | 211.5  | 1844 | 302.88 |   |

Supplemental Table 2  
Vehicle versus FSH, 24 hours

|      | A            | B    | C   | D     | E   | F      | G |
|------|--------------|------|-----|-------|-----|--------|---|
| 4640 | Ccndbp1      | 1.43 | 78  | 10.8  | 78  | 15.47  |   |
| 4641 | Hdac3        | 1.43 | 169 | 19.1  | 158 | 27.36  |   |
| 4642 | Zfp68        | 1.43 | 157 | 7.34  | 152 | 10.52  |   |
| 4643 | Mcm3ap       | 1.43 | 315 | 10.53 | 308 | 15.08  |   |
| 4644 | Cd47         | 1.43 | 340 | 31.72 | 322 | 45.41  |   |
| 4645 | Pnpt1        | 1.43 | 169 | 9.41  | 160 | 13.47  |   |
| 4646 | Rab18        | 1.43 | 183 | 27.64 | 169 | 39.54  |   |
| 4647 | Src          | 1.43 | 205 | 13.68 | 196 | 19.58  |   |
| 4648 | Tmem237      | 1.43 | 94  | 2.99  | 92  | 4.28   |   |
| 4649 | Tubgcp2      | 1.43 | 295 | 22.48 | 295 | 32.16  |   |
| 4650 | Cdt1         | 1.43 | 66  | 7.01  | 65  | 10.03  |   |
| 4651 | Hmgn2        | 1.43 | 307 | 86.98 | 306 | 124.33 |   |
| 4652 | Rad50        | 1.43 | 147 | 5.83  | 141 | 8.33   |   |
| 4653 | Fpgt         | 1.43 | 113 | 3.1   | 66  | 4.43   |   |
| 4654 | Ift52        | 1.43 | 131 | 12.97 | 131 | 18.53  |   |
| 4655 | Itpr3        | 1.43 | 66  | 1.67  | 63  | 2.39   |   |
| 4656 | Chpf         | 1.43 | 358 | 29.9  | 350 | 42.7   |   |
| 4657 | Siae         | 1.43 | 80  | 4.18  | 65  | 5.96   |   |
| 4658 | Ncapd3       | 1.43 | 155 | 5.45  | 158 | 7.79   |   |
| 4659 | Aip          | 1.43 | 122 | 13.28 | 121 | 18.96  |   |
| 4660 | Diexf        | 1.43 | 85  | 4.76  | 75  | 6.8    |   |
| 4661 | Dnal4        | 1.43 | 60  | 9.42  | 67  | 13.45  |   |
| 4662 | Ncoa1        | 1.43 | 277 | 7.82  | 284 | 11.16  |   |
| 4663 | Dpy30        | 1.43 | 77  | 17.41 | 75  | 24.84  |   |
| 4664 | Eya1         | 1.43 | 105 | 7.61  | 143 | 10.86  |   |
| 4665 | Tmem184b     | 1.43 | 317 | 20.34 | 303 | 29.01  |   |
| 4666 | Rimklb       | 1.43 | 59  | 23.04 | 59  | 32.86  |   |
| 4667 | LOC100363043 | 1.43 | 113 | 24.36 | 107 | 34.72  |   |
| 4668 | Pnpla8       | 1.43 | 118 | 11.22 | 121 | 16     |   |
| 4669 | Plxna1       | 1.43 | 759 | 20.49 | 734 | 29.21  |   |
| 4670 | Slc29a3      | 1.43 | 111 | 6.56  | 109 | 9.34   |   |
| 4671 | ldh3g        | 1.42 | 212 | 38.16 | 213 | 54.38  |   |
| 4672 | Rapgef1      | 1.42 | 309 | 15.1  | 281 | 21.5   |   |
| 4673 | LOC100294508 | 1.42 | 457 | 23.4  | 447 | 33.33  |   |
| 4674 | Poc1b        | 1.42 | 177 | 4.17  | 135 | 5.93   |   |
| 4675 | Fam160a1     | 1.42 | 61  | 6.16  | 87  | 8.76   |   |
| 4676 | Lrrc8c       | 1.42 | 422 | 12.15 | 390 | 17.29  |   |
| 4677 | B3glct       | 1.42 | 89  | 6.91  | 89  | 9.83   |   |
| 4678 | Fam210a      | 1.42 | 161 | 3.84  | 161 | 5.46   |   |
| 4679 | Igfbp1       | 1.42 | 90  | 4.63  | 97  | 6.59   |   |
| 4680 | Wrap53       | 1.42 | 64  | 6.46  | 68  | 9.19   |   |
| 4681 | Ddit4l2      | 1.42 | 251 | 65.22 | 240 | 92.74  |   |
| 4682 | Slc35f6      | 1.42 | 150 | 11.7  | 144 | 16.64  |   |
| 4683 | Arpin        | 1.42 | 57  | 3     | 50  | 4.26   |   |
| 4684 | Hira         | 1.42 | 13  | 10.17 | 21  | 14.46  |   |
| 4685 | Frg1         | 1.42 | 36  | 10.3  | 50  | 14.64  |   |
| 4686 | Setdb1       | 1.42 | 257 | 11.89 | 279 | 16.9   |   |
| 4687 | Nr1h2        | 1.42 | 240 | 28.3  | 240 | 40.23  |   |
| 4688 | Emc3         | 1.42 | 330 | 39.52 | 317 | 56.13  |   |
| 4689 | Smug1        | 1.42 | 46  | 3.22  | 46  | 4.58   |   |
| 4690 | Xxyt1        | 1.42 | 64  | 9.3   | 66  | 13.21  |   |
| 4691 | Pdia4        | 1.42 | 850 | 89.33 | 821 | 126.86 |   |
| 4692 | LOC361635    | 1.42 | 356 | 23.7  | 335 | 33.65  |   |
| 4693 | Tspyl1       | 1.42 | 130 | 12.76 | 127 | 18.11  |   |

Supplemental Table 2  
Vehicle versus FSH, 24 hours

|      | A               | B    | C   | D     | E   | F     | G |
|------|-----------------|------|-----|-------|-----|-------|---|
| 4694 | Prkd3           | 1.42 | 252 | 13.57 | 248 | 19.27 |   |
| 4695 | Lrrc41          | 1.42 | 673 | 50.63 | 637 | 71.85 |   |
| 4696 | Foxp4           | 1.42 | 126 | 5.06  | 116 | 7.18  |   |
| 4697 | Tp53inp1        | 1.42 | 145 | 20.8  | 126 | 29.52 |   |
| 4698 | Amdhd2          | 1.42 | 56  | 7.11  | 55  | 10.08 |   |
| 4699 | H1fx            | 1.42 | 42  | 18.07 | 41  | 25.64 |   |
| 4700 | RGD1311805      | 1.42 | 160 | 13.97 | 142 | 19.81 |   |
| 4701 | Gigyf1          | 1.42 | 138 | 7.84  | 124 | 11.12 |   |
| 4702 | Nfyc            | 1.42 | 241 | 20.44 | 315 | 28.99 |   |
| 4703 | Sec61a2         | 1.42 | 191 | 8.49  | 182 | 12.04 |   |
| 4704 | Exoc4           | 1.42 | 251 | 8.61  | 294 | 12.21 |   |
| 4705 | Foxn3           | 1.42 | 250 | 8.02  | 247 | 11.37 |   |
| 4706 | Thtpa           | 1.42 | 120 | 12.13 | 115 | 17.19 |   |
| 4707 | Aprt            | 1.42 | 85  | 37.17 | 85  | 52.68 |   |
| 4708 | Rpl34-ps1       | 1.42 | 63  | 47.27 | 60  | 66.99 |   |
| 4709 | Rab34           | 1.42 | 252 | 53.03 | 249 | 75.15 |   |
| 4710 | Rsbn1l          | 1.42 | 114 | 5.8   | 110 | 8.22  |   |
| 4711 | RGD735065       | 1.42 | 157 | 22.09 | 154 | 31.28 |   |
| 4712 | Ctns            | 1.42 | 75  | 4.83  | 50  | 6.85  |   |
| 4713 | Zfp292          | 1.42 | 261 | 5.83  | 271 | 8.25  |   |
| 4714 | Hsp90aa1        | 1.41 | 0   | 4.3   | 0   | 6.08  |   |
| 4715 | Def8            | 1.41 | 91  | 6.05  | 84  | 8.56  |   |
| 4716 | Eil             | 1.41 | 179 | 7.91  | 147 | 11.2  |   |
| 4717 | ENSRNOG00000050 | 1.41 | 161 | 7.43  | 164 | 10.5  |   |
| 4718 | Mau2            | 1.41 | 466 | 10.96 | 442 | 15.5  |   |
| 4719 | Rnaset2         | 1.41 | 94  | 23.55 | 84  | 33.3  |   |
| 4720 | Sphk2           | 1.41 | 119 | 11.61 | 112 | 16.42 |   |
| 4721 | Gtf2h3          | 1.41 | 46  | 4.38  | 46  | 6.19  |   |
| 4722 | Chd9            | 1.41 | 321 | 6.79  | 340 | 9.59  |   |
| 4723 | Zscan26         | 1.41 | 228 | 10.91 | 224 | 15.41 |   |
| 4724 | Acadsb          | 1.41 | 57  | 4.4   | 66  | 6.21  |   |
| 4725 | Pde8a           | 1.41 | 694 | 38.06 | 558 | 53.74 |   |
| 4726 | Dlg4            | 1.41 | 99  | 5.48  | 85  | 7.74  |   |
| 4727 | Ints1_2         | 1.41 | 7   | 6.96  | 7   | 9.84  |   |
| 4728 | Zfp868          | 1.41 | 63  | 6.86  | 48  | 9.68  |   |
| 4729 | Peli1           | 1.41 | 54  | 3.66  | 38  | 5.17  |   |
| 4730 | Zc3h4           | 1.41 | 392 | 14.73 | 378 | 20.78 |   |
| 4731 | Nufip1          | 1.41 | 180 | 8.85  | 141 | 12.49 |   |
| 4732 | Slc19a1         | 1.41 | 45  | 3.41  | 39  | 4.8   |   |
| 4733 | Slc26a6         | 1.41 | 50  | 2.35  | 49  | 3.31  |   |
| 4734 | G6pdx           | 1.41 | 629 | 63.44 | 622 | 89.45 |   |
| 4735 | Pbx2            | 1.41 | 63  | 17.04 | 72  | 24.02 |   |
| 4736 | Lrig2           | 1.41 | 102 | 3.62  | 83  | 5.11  |   |
| 4737 | Stx8            | 1.41 | 104 | 9.78  | 90  | 13.78 |   |
| 4738 | Atg14           | 1.41 | 95  | 4.64  | 80  | 6.54  |   |
| 4739 | Tssc4           | 1.41 | 79  | 11.73 | 73  | 16.52 |   |
| 4740 | Xpnpep3         | 1.41 | 117 | 3.72  | 113 | 5.24  |   |
| 4741 | Pxmp4           | 1.41 | 40  | 5.8   | 35  | 8.17  |   |
| 4742 | RGD1306063      | 1.41 | 78  | 6.79  | 75  | 9.56  |   |
| 4743 | Rn60_14_1002.4  | 1.41 | 7   | 5.14  | 10  | 7.24  |   |
| 4744 | Caprin2         | 1.41 | 49  | 2.58  | 49  | 3.63  |   |
| 4745 | Dpp3            | 1.41 | 377 | 24.46 | 277 | 34.43 |   |
| 4746 | Kbtbd2          | 1.41 | 233 | 13.93 | 217 | 19.61 |   |
| 4747 | Mocs3           | 1.41 | 32  | 4.09  | 31  | 5.76  |   |



Supplemental Table 2  
Vehicle versus FSH, 24 hours

|      | A              | B    | C   | D     | E   | F     | G |
|------|----------------|------|-----|-------|-----|-------|---|
| 4748 | Slc12a9        | 1.41 | 35  | 2.44  | 36  | 3.43  |   |
| 4749 | Msantd4        | 1.41 | 96  | 8.08  | 93  | 11.37 |   |
| 4750 | Wiz            | 1.41 | 379 | 17.68 | 331 | 24.87 |   |
| 4751 | Gata6          | 1.41 | 583 | 50.23 | 530 | 70.64 |   |
| 4752 | Sh3kbp1        | 1.41 | 45  | 2.18  | 55  | 3.07  |   |
| 4753 | Trim39         | 1.41 | 78  | 3.05  | 79  | 4.29  |   |
| 4754 | Ampd2          | 1.41 | 164 | 9.98  | 158 | 14.02 |   |
| 4755 | Ppa2           | 1.41 | 75  | 9.54  | 77  | 13.41 |   |
| 4756 | Tspan13        | 1.41 | 65  | 7.83  | 71  | 11.01 |   |
| 4757 | Rnf187         | 1.41 | 258 | 32.02 | 250 | 45    |   |
| 4758 | Snopc5         | 1.4  | 31  | 6.26  | 29  | 8.79  |   |
| 4759 | Coro7          | 1.4  | 106 | 6.82  | 92  | 9.57  |   |
| 4760 | Mtmr1          | 1.4  | 177 | 10.57 | 171 | 14.84 |   |
| 4761 | Tiam2          | 1.4  | 130 | 3.8   | 122 | 5.34  |   |
| 4762 | Epm2aip1       | 1.4  | 383 | 13.05 | 370 | 18.33 |   |
| 4763 | Dhx30          | 1.4  | 338 | 18.81 | 339 | 26.42 |   |
| 4764 | Cc2d1b         | 1.4  | 165 | 11.08 | 153 | 15.56 |   |
| 4765 | Akap8l         | 1.4  | 98  | 7.04  | 106 | 9.88  |   |
| 4766 | Pard3          | 1.4  | 546 | 10.96 | 584 | 15.38 |   |
| 4767 | Cbfa2t2        | 1.4  | 160 | 8.44  | 167 | 11.84 |   |
| 4768 | Pef1           | 1.4  | 134 | 17.35 | 123 | 24.35 |   |
| 4769 | Fzd2           | 1.4  | 146 | 19.04 | 139 | 26.71 |   |
| 4770 | Golga1         | 1.4  | 98  | 3.22  | 93  | 4.52  |   |
| 4771 | Ikzf5          | 1.4  | 17  | 2.6   | 20  | 3.65  |   |
| 4772 | LOC103689982   | 1.4  | 17  | 6.32  | 23  | 8.87  |   |
| 4773 | Mocs1          | 1.4  | 59  | 4.58  | 80  | 6.42  |   |
| 4774 | Txn2           | 1.4  | 198 | 37.99 | 189 | 53.28 |   |
| 4775 | Trmt112        | 1.4  | 89  | 37.03 | 83  | 51.9  |   |
| 4776 | Cnot2          | 1.4  | 245 | 21.61 | 222 | 30.28 |   |
| 4777 | Gbp2           | 1.4  | 117 | 11.25 | 112 | 15.76 |   |
| 4778 | Kat8           | 1.4  | 103 | 9.26  | 85  | 12.97 |   |
| 4779 | Ehmt2          | 1.4  | 484 | 27.17 | 483 | 38.07 |   |
| 4780 | Entpd4         | 1.4  | 136 | 8.8   | 135 | 12.32 |   |
| 4781 | Parn           | 1.4  | 115 | 5.97  | 118 | 8.36  |   |
| 4782 | Suclg2         | 1.4  | 387 | 37.28 | 400 | 52.21 |   |
| 4783 | Stat5b         | 1.4  | 131 | 10.16 | 122 | 14.22 |   |
| 4784 | Usp33          | 1.4  | 446 | 16.08 | 374 | 22.51 |   |
| 4785 | AABR07051400.1 | 1.4  | 39  | 8.04  | 37  | 11.25 |   |
| 4786 | Ngly1          | 1.4  | 151 | 8.13  | 121 | 11.37 |   |
| 4787 | Rbm28          | 1.4  | 111 | 5     | 107 | 7     |   |
| 4788 | Smap2          | 1.4  | 101 | 6.55  | 87  | 9.16  |   |
| 4789 | Med7           | 1.4  | 28  | 5.53  | 31  | 7.72  |   |
| 4790 | Zbtb25         | 1.4  | 47  | 2.42  | 59  | 3.38  |   |
| 4791 | Zfp639         | 1.4  | 58  | 8.89  | 56  | 12.42 |   |
| 4792 | Psip1          | 1.4  | 327 | 10.17 | 257 | 14.2  |   |
| 4793 | Ecm1           | 1.4  | 207 | 25.79 | 199 | 36    |   |
| 4794 | Gfer           | 1.4  | 82  | 15.43 | 72  | 21.54 |   |
| 4795 | Ggcx           | 1.4  | 253 | 13.3  | 226 | 18.55 |   |
| 4796 | Fen1           | 1.39 | 40  | 5.74  | 42  | 8     |   |
| 4797 | Poll           | 1.39 | 49  | 5.43  | 50  | 7.57  |   |
| 4798 | Puf60          | 1.39 | 419 | 48.36 | 383 | 67.47 |   |
| 4799 | Med22_1        | 1.39 | 0   | 14.02 | 0   | 19.56 |   |
| 4800 | Cbfb           | 1.39 | 246 | 17.09 | 226 | 23.83 |   |
| 4801 | Milt6          | 1.39 | 164 | 8.25  | 160 | 11.5  |   |

Supplemental Table 2  
Vehicle versus FSH, 24 hours

|      | A            | B    | C    | D      | E    | F      | G |
|------|--------------|------|------|--------|------|--------|---|
| 4802 | Nono         | 1.39 | 1009 | 80.05  | 968  | 111.61 |   |
| 4803 | Fbxo9        | 1.39 | 122  | 8.7    | 102  | 12.13  |   |
| 4804 | Shkbp1       | 1.39 | 55   | 4.83   | 54   | 6.73   |   |
| 4805 | LOC100911274 | 1.39 | 83   | 13.37  | 79   | 18.64  |   |
| 4806 | Tymp         | 1.39 | 113  | 7.74   | 90   | 10.78  |   |
| 4807 | Zbtb24       | 1.39 | 95   | 4.83   | 97   | 6.72   |   |
| 4808 | Prkar1a      | 1.39 | 914  | 142.83 | 820  | 198.96 |   |
| 4809 | Ccdc59       | 1.39 | 33   | 3.22   | 28   | 4.49   |   |
| 4810 | Esco2        | 1.39 | 14   | 1.73   | 17   | 2.41   |   |
| 4811 | Gpd1l        | 1.39 | 112  | 6.23   | 94   | 8.68   |   |
| 4812 | Trex1        | 1.39 | 25   | 5.87   | 23   | 8.17   |   |
| 4813 | Arl13b       | 1.39 | 130  | 3.32   | 98   | 4.62   |   |
| 4814 | Brat1        | 1.39 | 19   | 1.69   | 16   | 2.36   |   |
| 4815 | Trafd1       | 1.39 | 211  | 16.04  | 180  | 22.32  |   |
| 4816 | Dgat1        | 1.39 | 110  | 10.13  | 90   | 14.09  |   |
| 4817 | Tbck         | 1.39 | 75   | 1.9    | 67   | 2.64   |   |
| 4818 | Adpgk        | 1.39 | 259  | 20.29  | 248  | 28.22  |   |
| 4819 | Naa60        | 1.39 | 30   | 10.04  | 27   | 13.97  |   |
| 4820 | Zkscan3      | 1.39 | 156  | 9.87   | 140  | 13.72  |   |
| 4821 | Eefsec       | 1.39 | 68   | 4.3    | 74   | 5.98   |   |
| 4822 | Naf1         | 1.39 | 30   | 1.04   | 31   | 1.45   |   |
| 4823 | Vps25        | 1.39 | 1    | 2.47   | 0    | 3.44   |   |
| 4824 | Zfp354a      | 1.39 | 29   | 2.05   | 21   | 2.84   |   |
| 4825 | C2cd5        | 1.39 | 71   | 2.49   | 75   | 3.46   |   |
| 4826 | Dtd2         | 1.39 | 26   | 4.39   | 26   | 6.11   |   |
| 4827 | Gsdmd        | 1.39 | 160  | 20.33  | 153  | 28.24  |   |
| 4828 | Atpaf1       | 1.39 | 87   | 3.96   | 77   | 5.5    |   |
| 4829 | Mrpl22       | 1.39 | 90   | 20.32  | 82   | 28.22  |   |
| 4830 | Vps45        | 1.39 | 100  | 8.49   | 85   | 11.79  |   |
| 4831 | Exosc4       | 1.39 | 53   | 6.24   | 50   | 8.66   |   |
| 4832 | Ubn2         | 1.39 | 296  | 8.74   | 261  | 12.14  |   |
| 4833 | Lig4         | 1.39 | 120  | 6.95   | 107  | 9.64   |   |
| 4834 | Mbtps2       | 1.39 | 115  | 2.69   | 96   | 3.74   |   |
| 4835 | Zdhhc15      | 1.39 | 38   | 1.9    | 35   | 2.64   |   |
| 4836 | G4           | 1.39 | 44   | 5.05   | 43   | 7      |   |
| 4837 | Lym9         | 1.39 | 26   | 3.48   | 25   | 4.83   |   |
| 4838 | Mfsd7b       | 1.39 | 46   | 3.09   | 40   | 4.29   |   |
| 4839 | Pros1        | 1.39 | 895  | 60.79  | 839  | 84.32  |   |
| 4840 | Ece1         | 1.39 | 1391 | 71.6   | 1318 | 99.3   |   |
| 4841 | Mknk2        | 1.39 | 328  | 22.08  | 301  | 30.6   |   |
| 4842 | Tbc1d13      | 1.39 | 118  | 10.21  | 120  | 14.15  |   |
| 4843 | Pcnt         | 1.39 | 185  | 3.98   | 178  | 5.52   |   |
| 4844 | Bbs1         | 1.39 | 46   | 2.57   | 43   | 3.56   |   |
| 4845 | Tor1aip2_2   | 1.39 | 209  | 25.17  | 186  | 34.86  |   |
| 4846 | Fbxl18       | 1.38 | 31   | 1.26   | 36   | 1.74   |   |
| 4847 | Jph1         | 1.38 | 35   | 1.17   | 31   | 1.62   |   |
| 4848 | Ppp1r3c      | 1.38 | 63   | 5.66   | 60   | 7.84   |   |
| 4849 | RGD1309594   | 1.38 | 24   | 2.93   | 24   | 4.05   |   |
| 4850 | Smarcd2      | 1.38 | 271  | 22.06  | 247  | 30.51  |   |
| 4851 | Prpf19       | 1.38 | 591  | 68.24  | 556  | 94.37  |   |
| 4852 | Helb         | 1.38 | 63   | 3.38   | 49   | 4.67   |   |
| 4853 | Cpsf6        | 1.38 | 507  | 13.63  | 458  | 18.84  |   |
| 4854 | Tbc1d5       | 1.38 | 322  | 10.01  | 364  | 13.83  |   |
| 4855 | Emc7         | 1.38 | 117  | 22.49  | 103  | 31.1   |   |

Supplemental Table 2  
Vehicle versus FSH, 24 hours

|      | A              | B    | C     | D       | E     | F       | G |
|------|----------------|------|-------|---------|-------|---------|---|
| 4856 | Rnf144b        | 1.38 | 83    | 2.04    | 64    | 2.81    |   |
| 4857 | RGD1562218     | 1.38 | 184   | 10.18   | 163   | 14.06   |   |
| 4858 | Phldb1         | 1.38 | 758   | 27.9    | 690   | 38.56   |   |
| 4859 | Zranb2         | 1.38 | 330   | 23.39   | 321   | 32.32   |   |
| 4860 | Gmppa          | 1.38 | 87    | 11.11   | 87    | 15.34   |   |
| 4861 | Cops8          | 1.38 | 184   | 25.34   | 152   | 35      |   |
| 4862 | Chmp2b         | 1.38 | 111   | 10.59   | 104   | 14.62   |   |
| 4863 | Uimc1          | 1.38 | 168   | 8.69    | 183   | 12      |   |
| 4864 | Smg6           | 1.38 | 240   | 4.46    | 217   | 6.16    |   |
| 4865 | Paip2          | 1.38 | 66    | 40.55   | 50    | 55.99   |   |
| 4866 | Snx19          | 1.38 | 236   | 10      | 229   | 13.8    |   |
| 4867 | Ndfip2         | 1.38 | 160   | 16.53   | 148   | 22.82   |   |
| 4868 | Engase         | 1.38 | 21    | 1.24    | 22    | 1.72    |   |
| 4869 | Ftsj1          | 1.38 | 62    | 6.03    | 47    | 8.32    |   |
| 4870 | Nudt22         | 1.38 | 25    | 4.66    | 23    | 6.43    |   |
| 4871 | RT1-CE2        | 1.38 | 30    | 3.24    | 24    | 4.47    |   |
| 4872 | Cecr2          | 1.38 | 62    | 2.21    | 61    | 3.04    |   |
| 4873 | Bnip3          | 1.38 | 99    | 18.33   | 105   | 25.29   |   |
| 4874 | Atp5g2         | 1.38 | 461   | 189.09  | 419   | 260.78  |   |
| 4875 | Atp6ap1        | 1.38 | 477   | 51.01   | 432   | 70.34   |   |
| 4876 | lfng2          | 1.38 | 90    | 7.45    | 84    | 10.27   |   |
| 4877 | Yeats4         | 1.38 | 84    | 14.84   | 89    | 20.45   |   |
| 4878 | Rn60_14_0846.1 | 1.38 | 121   | 15.18   | 112   | 20.93   |   |
| 4879 | Eps15          | 1.38 | 561   | 39.54   | 541   | 54.49   |   |
| 4880 | Pgp            | 1.38 | 98    | 9.49    | 93    | 13.08   |   |
| 4881 | Mt-co1         | 1.38 | 26730 | 4341.13 | 25345 | 5982.22 |   |
| 4882 | Phkb           | 1.38 | 181   | 4.64    | 180   | 6.4     |   |
| 4883 | Xrcc1          | 1.38 | 114   | 11.51   | 106   | 15.86   |   |
| 4884 | Usp8           | 1.38 | 343   | 17.53   | 311   | 24.14   |   |
| 4885 | Cntrob         | 1.38 | 29    | 1.44    | 24    | 1.98    |   |
| 4886 | Dsn1           | 1.38 | 86    | 4.39    | 76    | 6.05    |   |
| 4887 | Gstm4          | 1.38 | 45    | 5.43    | 54    | 7.47    |   |
| 4888 | LOC685619      | 1.38 | 12    | 6.12    | 12    | 8.42    |   |
| 4889 | Txlng          | 1.38 | 113   | 2.59    | 73    | 3.57    |   |
| 4890 | Hjurp          | 1.38 | 45    | 3.31    | 51    | 4.56    |   |
| 4891 | Psmg4          | 1.38 | 72    | 16.44   | 73    | 22.63   |   |
| 4892 | Ptn            | 1.38 | 45    | 7.23    | 43    | 9.95    |   |
| 4893 | Rnf19b         | 1.38 | 230   | 17.79   | 210   | 24.49   |   |
| 4894 | Sqstm1         | 1.38 | 741   | 77.07   | 707   | 106.1   |   |
| 4895 | lft140         | 1.38 | 225   | 7.81    | 218   | 10.75   |   |
| 4896 | Ube2b          | 1.38 | 360   | 39.8    | 285   | 54.75   |   |
| 4897 | Mon1b          | 1.38 | 74    | 6.92    | 71    | 9.51    |   |
| 4898 | Exosc9         | 1.38 | 101   | 7.41    | 80    | 10.2    |   |
| 4899 | Psen1          | 1.38 | 223   | 22.51   | 205   | 30.95   |   |
| 4900 | Cnpy4          | 1.37 | 96    | 15.15   | 89    | 20.82   |   |
| 4901 | Cpsf7          | 1.37 | 349   | 21.92   | 312   | 30.11   |   |
| 4902 | Ythdc1         | 1.37 | 268   | 15.36   | 231   | 21.1    |   |
| 4903 | Tmed1          | 1.37 | 203   | 37.66   | 193   | 51.72   |   |
| 4904 | Ppp4c          | 1.37 | 196   | 32.86   | 190   | 45.13   |   |
| 4905 | Copz1          | 1.37 | 538   | 53.99   | 510   | 74.12   |   |
| 4906 | Gorasp2_2      | 1.37 | 0     | 3.21    | 0     | 4.4     |   |
| 4907 | Kbtbd4         | 1.37 | 70    | 6       | 63    | 8.24    |   |
| 4908 | Malsu1         | 1.37 | 23    | 6       | 25    | 8.24    |   |
| 4909 | N6amt1         | 1.37 | 19    | 3.78    | 24    | 5.19    |   |

Supplemental Table 2  
Vehicle versus FSH, 24 hours

|      | A            | B    | C    | D      | E    | F      | G |
|------|--------------|------|------|--------|------|--------|---|
| 4910 | S100ppb      | 1.37 | 300  | 9.11   | 244  | 12.5   |   |
| 4911 | Vamp1        | 1.37 | 20   | 1.7    | 18   | 2.34   |   |
| 4912 | Cdk5rap1     | 1.37 | 68   | 3.46   | 67   | 4.74   |   |
| 4913 | F8           | 1.37 | 105  | 2.69   | 111  | 3.69   |   |
| 4914 | Tpd5211      | 1.37 | 72   | 3.37   | 79   | 4.63   |   |
| 4915 | Zbtb43       | 1.37 | 32   | 2.97   | 25   | 4.07   |   |
| 4916 | Zswim1       | 1.37 | 18   | 3.28   | 17   | 4.5    |   |
| 4917 | Prdx2        | 1.37 | 973  | 268.51 | 917  | 368.27 |   |
| 4918 | Rpap3        | 1.37 | 132  | 9.92   | 148  | 13.6   |   |
| 4919 | Chd6         | 1.37 | 530  | 10.41  | 518  | 14.28  |   |
| 4920 | Ppp5c        | 1.37 | 171  | 17.1   | 157  | 23.44  |   |
| 4921 | Spsb1        | 1.37 | 1115 | 84.86  | 1030 | 116.29 |   |
| 4922 | Fiz1         | 1.37 | 109  | 8.46   | 100  | 11.6   |   |
| 4923 | Mob2         | 1.37 | 69   | 7.33   | 56   | 10.04  |   |
| 4924 | Mrps5        | 1.37 | 80   | 7.33   | 76   | 10.05  |   |
| 4925 | RGD1308147   | 1.37 | 36   | 4.42   | 33   | 6.05   |   |
| 4926 | Rpap1        | 1.37 | 142  | 6.31   | 125  | 8.65   |   |
| 4927 | LOC100910540 | 1.37 | 13   | 6.99   | 9    | 9.57   |   |
| 4928 | Kat5         | 1.37 | 159  | 18.58  | 157  | 25.45  |   |
| 4929 | Yipf3        | 1.37 | 137  | 14.38  | 137  | 19.7   |   |
| 4930 | Spats2       | 1.37 | 29   | 6.59   | 27   | 9.03   |   |
| 4931 | Slc25a36l1   | 1.37 | 217  | 22.89  | 273  | 31.33  |   |
| 4932 | Chpf2        | 1.37 | 275  | 16.46  | 259  | 22.53  |   |
| 4933 | Drosha       | 1.37 | 263  | 12.41  | 243  | 16.98  |   |
| 4934 | Man2a2       | 1.37 | 288  | 15.9   | 275  | 21.76  |   |
| 4935 | Tgfr1_1      | 1.37 | 266  | 15.97  | 274  | 21.85  |   |
| 4936 | Atp6v0a2     | 1.37 | 311  | 8.41   | 281  | 11.5   |   |
| 4937 | Psme1        | 1.37 | 142  | 59.55  | 154  | 81.47  |   |
| 4938 | Rnf169       | 1.37 | 80   | 4.06   | 74   | 5.56   |   |
| 4939 | Spred3       | 1.37 | 35   | 1.81   | 21   | 2.47   |   |
| 4940 | Chchd4_2     | 1.37 | 26   | 6.31   | 24   | 8.63   |   |
| 4941 | Tmem161b     | 1.37 | 44   | 2.9    | 44   | 3.97   |   |
| 4942 | Zfp688       | 1.37 | 22   | 5.12   | 22   | 7      |   |
| 4943 | Adam17       | 1.37 | 357  | 19.24  | 329  | 26.27  |   |
| 4944 | Prpf18       | 1.37 | 247  | 5.68   | 215  | 7.75   |   |
| 4945 | Camkk2       | 1.37 | 69   | 3.85   | 62   | 5.25   |   |
| 4946 | LOC690035    | 1.37 | 33   | 1.81   | 26   | 2.47   |   |
| 4947 | Plcb3        | 1.37 | 175  | 10.84  | 160  | 14.8   |   |
| 4948 | Spata2L      | 1.37 | 38   | 2.71   | 36   | 3.71   |   |
| 4949 | Rnmt         | 1.36 | 148  | 6.18   | 126  | 8.44   |   |
| 4950 | Srfbp1       | 1.36 | 103  | 4.37   | 95   | 5.96   |   |
| 4951 | Zdhhc4       | 1.36 | 68   | 8.76   | 61   | 11.95  |   |
| 4952 | Lrrc14       | 1.36 | 70   | 5.02   | 69   | 6.85   |   |
| 4953 | Tti1         | 1.36 | 175  | 6.42   | 150  | 8.76   |   |
| 4954 | Trappc11     | 1.36 | 161  | 7.98   | 160  | 10.89  |   |
| 4955 | Limd1        | 1.36 | 159  | 8.5    | 140  | 11.58  |   |
| 4956 | Rplp0        | 1.36 | 2476 | 599.78 | 2312 | 817.22 |   |
| 4957 | Slc7a6       | 1.36 | 215  | 12.01  | 205  | 16.36  |   |
| 4958 | Asb15        | 1.36 | 18   | 0.94   | 16   | 1.28   |   |
| 4959 | Bbs10        | 1.36 | 16   | 1.49   | 14   | 2.03   |   |
| 4960 | Gemin2       | 1.36 | 33   | 2.83   | 45   | 3.85   |   |
| 4961 | Mgat4a       | 1.36 | 21   | 0.55   | 26   | 0.76   |   |
| 4962 | Oard1        | 1.36 | 21   | 2.87   | 24   | 3.92   |   |
| 4963 | Rpa1         | 1.36 | 198  | 14.15  | 195  | 19.28  |   |

Supplemental Table 2  
Vehicle versus FSH, 24 hours

|      | A            | B    | C   | D      | E   | F      | G |
|------|--------------|------|-----|--------|-----|--------|---|
| 4964 | Wdr89        | 1.36 | 17  | 1.9    | 16  | 2.59   |   |
| 4965 | Tspan6       | 1.36 | 195 | 29.63  | 189 | 40.36  |   |
| 4966 | Mier2        | 1.36 | 152 | 9.06   | 134 | 12.33  |   |
| 4967 | Rhoq         | 1.36 | 284 | 13.3   | 236 | 18.11  |   |
| 4968 | Cdk16        | 1.36 | 649 | 48.12  | 589 | 65.5   |   |
| 4969 | Nfyb         | 1.36 | 87  | 6.17   | 82  | 8.39   |   |
| 4970 | Usp39        | 1.36 | 158 | 10.56  | 141 | 14.37  |   |
| 4971 | Plekhm2      | 1.36 | 289 | 14.06  | 251 | 19.13  |   |
| 4972 | LOC102550456 | 1.36 | 15  | 9.94   | 12  | 13.52  |   |
| 4973 | Rbak         | 1.36 | 35  | 2.18   | 37  | 2.97   |   |
| 4974 | LOC100362023 | 1.36 | 252 | 18.45  | 241 | 25.07  |   |
| 4975 | Spcs1        | 1.36 | 113 | 30.72  | 103 | 41.75  |   |
| 4976 | Wsb1         | 1.36 | 792 | 49.24  | 820 | 66.91  |   |
| 4977 | Tf           | 1.36 | 93  | 5.87   | 87  | 7.97   |   |
| 4978 | Abca5        | 1.36 | 50  | 2.15   | 52  | 2.91   |   |
| 4979 | Fastk        | 1.36 | 169 | 16.57  | 143 | 22.5   |   |
| 4980 | Spata6       | 1.36 | 73  | 6.37   | 75  | 8.65   |   |
| 4981 | Ccdc8        | 1.36 | 262 | 19.56  | 239 | 26.56  |   |
| 4982 | Apbb1        | 1.36 | 109 | 10.02  | 104 | 13.6   |   |
| 4983 | Heatr5b      | 1.36 | 294 | 8.96   | 287 | 12.16  |   |
| 4984 | Tmem131      | 1.36 | 420 | 16.61  | 386 | 22.54  |   |
| 4985 | AC130391.3   | 1.36 | 8   | 2.9    | 6   | 3.93   |   |
| 4986 | Ncapd2       | 1.36 | 140 | 7.17   | 128 | 9.72   |   |
| 4987 | Zfp40        | 1.36 | 15  | 1.31   | 14  | 1.78   |   |
| 4988 | Apcdd1       | 1.36 | 340 | 26.04  | 311 | 35.31  |   |
| 4989 | Gsr          | 1.36 | 280 | 26.06  | 239 | 35.31  |   |
| 4990 | Ints9        | 1.36 | 139 | 10.18  | 128 | 13.79  |   |
| 4991 | Rpl9         | 1.35 | 29  | 261.74 | 13  | 354.64 |   |
| 4992 | Rprd2        | 1.35 | 238 | 10.85  | 229 | 14.71  |   |
| 4993 | Ecsit        | 1.35 | 80  | 9.88   | 70  | 13.38  |   |
| 4994 | RGD1564447   | 1.35 | 290 | 92.15  | 265 | 124.81 |   |
| 4995 | Cbll1        | 1.35 | 107 | 6.32   | 105 | 8.56   |   |
| 4996 | Xab2         | 1.35 | 159 | 13.12  | 145 | 17.77  |   |
| 4997 | Pcyox1l      | 1.35 | 182 | 17.09  | 148 | 23.15  |   |
| 4998 | Cmtr1        | 1.35 | 477 | 26.32  | 446 | 35.63  |   |
| 4999 | Pou2f1       | 1.35 | 54  | 2.62   | 59  | 3.54   |   |
| 5000 | Rbmxl1       | 1.35 | 126 | 38.44  | 114 | 52     |   |
| 5001 | Zzz3         | 1.35 | 392 | 12.46  | 347 | 16.85  |   |
| 5002 | Nlgn2        | 1.35 | 85  | 3.57   | 70  | 4.83   |   |
| 5003 | Rpl7a_1      | 1.35 | 0   | 22.17  | 0   | 29.95  |   |
| 5004 | Sirt1        | 1.35 | 111 | 6.83   | 106 | 9.23   |   |
| 5005 | Dnpep        | 1.35 | 308 | 42.66  | 283 | 57.6   |   |
| 5006 | Ccdc109b     | 1.35 | 207 | 31.43  | 172 | 42.4   |   |
| 5007 | Fancd2       | 1.35 | 57  | 2.4    | 56  | 3.24   |   |
| 5008 | RGD1309730   | 1.35 | 38  | 3.33   | 30  | 4.49   |   |
| 5009 | Zfp248       | 1.35 | 29  | 0.93   | 24  | 1.25   |   |
| 5010 | Cep41        | 1.35 | 21  | 0.98   | 16  | 1.32   |   |
| 5011 | Foxred1      | 1.35 | 40  | 3.71   | 37  | 5.01   |   |
| 5012 | Lars2        | 1.35 | 71  | 3.35   | 73  | 4.52   |   |
| 5013 | Lyplal1      | 1.35 | 18  | 2.63   | 22  | 3.56   |   |
| 5014 | Ncoa3        | 1.35 | 163 | 6.05   | 136 | 8.17   |   |
| 5015 | RGD1308134   | 1.35 | 51  | 15.56  | 54  | 21     |   |
| 5016 | Spag1        | 1.35 | 48  | 0.96   | 39  | 1.29   |   |
| 5017 | Cpsf1        | 1.35 | 244 | 12.69  | 231 | 17.12  |   |

Supplemental Table 2  
Vehicle versus FSH, 24 hours

|      | A              | B    | C    | D      | E   | F      | G |
|------|----------------|------|------|--------|-----|--------|---|
| 5018 | Tor1aip1       | 1.35 | 250  | 17.45  | 243 | 23.52  |   |
| 5019 | Elmod2         | 1.35 | 21   | 2.87   | 15  | 3.87   |   |
| 5020 | Crnk1l_1       | 1.35 | 24   | 10.28  | 20  | 13.85  |   |
| 5021 | Col18a1        | 1.35 | 151  | 6.82   | 135 | 9.18   |   |
| 5022 | Fan1           | 1.35 | 48   | 1.97   | 48  | 2.65   |   |
| 5023 | H2afv          | 1.35 | 78   | 10.78  | 51  | 14.51  |   |
| 5024 | Ttc17          | 1.35 | 221  | 8.66   | 199 | 11.67  |   |
| 5025 | Ltbr           | 1.35 | 356  | 40.95  | 331 | 55.14  |   |
| 5026 | Mms22l         | 1.35 | 85   | 3.78   | 97  | 5.09   |   |
| 5027 | Glmn           | 1.35 | 60   | 2.92   | 61  | 3.93   |   |
| 5028 | Polr2g         | 1.35 | 115  | 29.35  | 105 | 39.48  |   |
| 5029 | Dock11         | 1.35 | 71   | 2.01   | 63  | 2.7    |   |
| 5030 | Zscan2         | 1.35 | 31   | 2.12   | 33  | 2.86   |   |
| 5031 | Sik2           | 1.35 | 643  | 15.46  | 559 | 20.8   |   |
| 5032 | Jmjd1c         | 1.35 | 590  | 13.26  | 558 | 17.84  |   |
| 5033 | Prpf4          | 1.34 | 108  | 9.02   | 99  | 12.13  |   |
| 5034 | Pnma2          | 1.34 | 70   | 5.02   | 64  | 6.75   |   |
| 5035 | Atp1b3         | 1.34 | 769  | 102.38 | 709 | 137.62 |   |
| 5036 | Meaf6          | 1.34 | 63   | 8.48   | 56  | 11.4   |   |
| 5037 | MGC94199_1     | 1.34 | 0    | 5.14   | 0   | 6.91   |   |
| 5038 | Ubac2          | 1.34 | 157  | 16     | 151 | 21.5   |   |
| 5039 | Ganab          | 1.34 | 1086 | 65.8   | 988 | 88.41  |   |
| 5040 | Cdk5           | 1.34 | 57   | 6.24   | 57  | 8.38   |   |
| 5041 | Mtcl1          | 1.34 | 283  | 7.14   | 261 | 9.59   |   |
| 5042 | Ssr3           | 1.34 | 745  | 69.73  | 677 | 93.67  |   |
| 5043 | Prkaca         | 1.34 | 414  | 42.99  | 377 | 57.74  |   |
| 5044 | Hsf2           | 1.34 | 144  | 10.28  | 130 | 13.8   |   |
| 5045 | Rnf114         | 1.34 | 187  | 19.78  | 174 | 26.54  |   |
| 5046 | Elovl5         | 1.34 | 400  | 85.54  | 370 | 114.79 |   |
| 5047 | Fam134c        | 1.34 | 236  | 15.86  | 208 | 21.28  |   |
| 5048 | Men1           | 1.34 | 228  | 18.57  | 207 | 24.92  |   |
| 5049 | AABR07051947.1 | 1.34 | 15   | 8.18   | 17  | 10.97  |   |
| 5050 | Prickle3       | 1.34 | 48   | 2.99   | 38  | 4.01   |   |
| 5051 | C030039L03Rik  | 1.34 | 17   | 1.7    | 14  | 2.27   |   |
| 5052 | Ccne1          | 1.34 | 28   | 3.32   | 26  | 4.45   |   |
| 5053 | LOC499331      | 1.34 | 43   | 5.8    | 36  | 7.78   |   |
| 5054 | Prelp          | 1.34 | 14   | 0.89   | 11  | 1.2    |   |
| 5055 | Rab2b          | 1.34 | 72   | 8.45   | 73  | 11.33  |   |
| 5056 | Slc26a11       | 1.34 | 59   | 5.46   | 56  | 7.33   |   |
| 5057 | Slc7a8         | 1.34 | 17   | 0.78   | 15  | 1.04   |   |
| 5058 | Sntb1          | 1.34 | 38   | 1.01   | 43  | 1.36   |   |
| 5059 | Stk36          | 1.34 | 50   | 1.93   | 51  | 2.59   |   |
| 5060 | Tmem70         | 1.34 | 31   | 3.67   | 29  | 4.92   |   |
| 5061 | Cyhr1          | 1.34 | 399  | 10.29  | 358 | 13.8   |   |
| 5062 | Dad1           | 1.34 | 200  | 52.32  | 191 | 70.15  |   |
| 5063 | Nck2           | 1.34 | 266  | 13.98  | 238 | 18.74  |   |
| 5064 | Cxxc1          | 1.34 | 190  | 17.09  | 167 | 22.9   |   |
| 5065 | Pkm_2          | 1.34 | 200  | 92.51  | 172 | 123.95 |   |
| 5066 | Cog6           | 1.34 | 223  | 14.9   | 192 | 19.95  |   |
| 5067 | Arhgap32       | 1.34 | 355  | 7.65   | 310 | 10.24  |   |
| 5068 | Rps6ka3        | 1.34 | 562  | 16.42  | 515 | 21.98  |   |
| 5069 | Troap          | 1.34 | 44   | 4.2    | 45  | 5.62   |   |
| 5070 | Mill1          | 1.34 | 257  | 13.69  | 236 | 18.32  |   |
| 5071 | Wdsub1         | 1.34 | 76   | 4.68   | 57  | 6.26   |   |

Supplemental Table 2  
Vehicle versus FSH, 24 hours

|      | A              | B    | C   | D      | E   | F     | G |
|------|----------------|------|-----|--------|-----|-------|---|
| 5072 | Auts2          | 1.34 | 253 | 17.46  | 236 | 23.36 |   |
| 5073 | Epn1           | 1.34 | 302 | 30.41  | 270 | 40.69 |   |
| 5074 | Sfmbt1         | 1.34 | 154 | 6.36   | 145 | 8.51  |   |
| 5075 | Map2k7         | 1.34 | 136 | 21.53  | 119 | 28.79 |   |
| 5076 | Zfyve1         | 1.34 | 157 | 7.37   | 126 | 9.85  |   |
| 5077 | Rsrp1          | 1.34 | 419 | 35.71  | 381 | 47.75 |   |
| 5078 | Napa           | 1.34 | 241 | 34.53  | 213 | 46.17 |   |
| 5079 | Fam173a        | 1.34 | 31  | 5.47   | 26  | 7.32  |   |
| 5080 | P2rx4          | 1.34 | 133 | 14.17  | 118 | 18.93 |   |
| 5081 | Tox4           | 1.34 | 257 | 18.98  | 251 | 25.36 |   |
| 5082 | Fxr2           | 1.34 | 493 | 39.63  | 450 | 52.92 |   |
| 5083 | Chpt1          | 1.34 | 45  | 6.03   | 50  | 8.05  |   |
| 5084 | Elp6           | 1.34 | 46  | 7      | 56  | 9.35  |   |
| 5085 | Ncaph          | 1.34 | 47  | 3.24   | 49  | 4.32  |   |
| 5086 | Smad9          | 1.33 | 62  | 3.79   | 67  | 5.06  |   |
| 5087 | H3f3b_2        | 1.33 | 400 | 318.88 | 363 | 425.5 |   |
| 5088 | Lpin3          | 1.33 | 137 | 8.76   | 144 | 11.69 |   |
| 5089 | Sympk          | 1.33 | 329 | 17.66  | 301 | 23.57 |   |
| 5090 | Lmtk2          | 1.33 | 385 | 10.73  | 361 | 14.31 |   |
| 5091 | Ppm1b          | 1.33 | 288 | 7.95   | 248 | 10.61 |   |
| 5092 | Mrps34         | 1.33 | 74  | 20.19  | 67  | 26.92 |   |
| 5093 | Atf6b          | 1.33 | 155 | 25.42  | 179 | 33.9  |   |
| 5094 | AABR07015165.1 | 1.33 | 133 | 9.72   | 121 | 12.96 |   |
| 5095 | Gna11          | 1.33 | 201 | 32     | 175 | 42.64 |   |
| 5096 | Ccbl1          | 1.33 | 64  | 8.44   | 52  | 11.24 |   |
| 5097 | Oasl           | 1.33 | 12  | 1.09   | 14  | 1.45  |   |
| 5098 | Eid1           | 1.33 | 0   | 3.48   | 0   | 4.63  |   |
| 5099 | Fam102a        | 1.33 | 42  | 2.27   | 39  | 3.02  |   |
| 5100 | LOC100910252   | 1.33 | 27  | 2.02   | 17  | 2.69  |   |
| 5101 | LOC679087      | 1.33 | 6   | 2.04   | 4   | 2.72  |   |
| 5102 | Mrpl52         | 1.33 | 123 | 20.5   | 112 | 27.3  |   |
| 5103 | Pcdhga9        | 1.33 | 23  | 2.47   | 20  | 3.29  |   |
| 5104 | Slc10a3        | 1.33 | 62  | 8.06   | 57  | 10.74 |   |
| 5105 | Steap3         | 1.33 | 18  | 1      | 13  | 1.33  |   |
| 5106 | Timm10b_1      | 1.33 | 1   | 2.23   | 1   | 2.98  |   |
| 5107 | Trim13         | 1.33 | 15  | 2.2    | 17  | 2.92  |   |
| 5108 | Zbtb44         | 1.33 | 81  | 5.52   | 83  | 7.35  |   |
| 5109 | Zfhx2          | 1.33 | 43  | 1      | 39  | 1.34  |   |
| 5110 | Zfp322a        | 1.33 | 74  | 3.81   | 63  | 5.08  |   |
| 5111 | Dtwd2          | 1.33 | 29  | 1.66   | 21  | 2.21  |   |
| 5112 | Erc6l          | 1.33 | 27  | 1.51   | 22  | 2.01  |   |
| 5113 | Hells          | 1.33 | 1   | 0.58   | 0   | 0.78  |   |
| 5114 | Snx1           | 1.33 | 82  | 17.69  | 77  | 23.57 |   |
| 5115 | Vps53          | 1.33 | 253 | 12.79  | 209 | 17.03 |   |
| 5116 | Ap2s1          | 1.33 | 130 | 29.2   | 113 | 38.86 |   |
| 5117 | Zfp637         | 1.33 | 106 | 18.4   | 90  | 24.48 |   |
| 5118 | Eif4ebp2       | 1.33 | 252 | 32.05  | 232 | 42.65 |   |
| 5119 | Rreb1          | 1.33 | 273 | 5.81   | 231 | 7.73  |   |
| 5120 | Vps72          | 1.33 | 207 | 32.52  | 187 | 43.26 |   |
| 5121 | 3110040N11Rik  | 1.33 | 53  | 5.72   | 44  | 7.6   |   |
| 5122 | Dennd6a        | 1.33 | 191 | 8.25   | 179 | 10.97 |   |
| 5123 | Cdc23          | 1.33 | 233 | 14.73  | 215 | 19.58 |   |
| 5124 | Pdgfd          | 1.33 | 200 | 7.83   | 158 | 10.41 |   |
| 5125 | Ahsa2          | 1.33 | 85  | 6.93   | 79  | 9.2   |   |

Supplemental Table 2  
Vehicle versus FSH, 24 hours

|      | A              | B    | C     | D      | E     | F       | G |
|------|----------------|------|-------|--------|-------|---------|---|
| 5126 | Pi4ka          | 1.33 | 363   | 10.59  | 312   | 14.07   |   |
| 5127 | Aldh9a1        | 1.33 | 142   | 19.84  | 148   | 26.35   |   |
| 5128 | Uxs1           | 1.33 | 439   | 30.54  | 344   | 40.56   |   |
| 5129 | Pigm           | 1.33 | 81    | 5.46   | 74    | 7.25    |   |
| 5130 | Pja1           | 1.33 | 258   | 24.54  | 220   | 32.57   |   |
| 5131 | Stmn1          | 1.33 | 257   | 47.5   | 226   | 63.04   |   |
| 5132 | Fam13a         | 1.33 | 191   | 10.88  | 179   | 14.44   |   |
| 5133 | Tmem256        | 1.33 | 15    | 12.65  | 15    | 16.78   |   |
| 5134 | Patz1          | 1.33 | 279   | 13.35  | 248   | 17.72   |   |
| 5135 | Ubl7           | 1.33 | 228   | 37.87  | 202   | 50.24   |   |
| 5136 | Dpysl2         | 1.33 | 1185  | 111.7  | 1070  | 148.14  |   |
| 5137 | Rad17          | 1.33 | 79    | 5.14   | 68    | 6.81    |   |
| 5138 | Abhd17a        | 1.33 | 209   | 27.4   | 167   | 36.31   |   |
| 5139 | Spice1         | 1.32 | 40    | 2.47   | 47    | 3.27    |   |
| 5140 | Agpat5         | 1.32 | 51    | 3.49   | 50    | 4.62    |   |
| 5141 | Irf2bp1        | 1.32 | 102   | 9.41   | 93    | 12.46   |   |
| 5142 | Kdm3a          | 1.32 | 251   | 12.07  | 226   | 15.99   |   |
| 5143 | Rbm14          | 1.32 | 266   | 15.11  | 274   | 20.01   |   |
| 5144 | Cnot8          | 1.32 | 192   | 19.14  | 175   | 25.34   |   |
| 5145 | RGD1561277     | 1.32 | 54    | 2.29   | 52    | 3.04    |   |
| 5146 | Mia3           | 1.32 | 431   | 21.14  | 377   | 27.98   |   |
| 5147 | Scd2           | 1.32 | 11569 | 581.88 | 10466 | 770.06  |   |
| 5148 | Trub2          | 1.32 | 82    | 10.77  | 74    | 14.26   |   |
| 5149 | Gprasp1        | 1.32 | 200   | 7.43   | 174   | 9.83    |   |
| 5150 | Golph3l        | 1.32 | 76    | 4.99   | 83    | 6.6     |   |
| 5151 | Pcdh11x        | 1.32 | 138   | 3.63   | 133   | 4.8     |   |
| 5152 | Rcn2           | 1.32 | 389   | 42.46  | 336   | 56.12   |   |
| 5153 | Mt-nd1         | 1.32 | 3275  | 864.38 | 2971  | 1142.32 |   |
| 5154 | Der1l          | 1.32 | 349   | 29.85  | 311   | 39.44   |   |
| 5155 | Atp6ap2        | 1.32 | 147   | 15.08  | 129   | 19.92   |   |
| 5156 | Inip           | 1.32 | 41    | 7.69   | 47    | 10.16   |   |
| 5157 | Ino80b         | 1.32 | 0     | 2.4    | 0     | 3.17    |   |
| 5158 | Samd1          | 1.32 | 78    | 13.35  | 71    | 17.64   |   |
| 5159 | AABR07061378.1 | 1.32 | 0     | 5.87   | 0     | 7.75    |   |
| 5160 | Kitlg          | 1.32 | 25    | 1.02   | 25    | 1.35    |   |
| 5161 | Mettl8         | 1.32 | 41    | 0.88   | 32    | 1.17    |   |
| 5162 | Mrm1           | 1.32 | 41    | 2.88   | 42    | 3.8     |   |
| 5163 | Pigw           | 1.32 | 22    | 3.63   | 20    | 4.8     |   |
| 5164 | Pskh1          | 1.32 | 159   | 7.98   | 143   | 10.54   |   |
| 5165 | RGD1560883_1   | 1.32 | 27    | 2.22   | 24    | 2.93    |   |
| 5166 | Srp14          | 1.32 | 44    | 22.87  | 41    | 30.21   |   |
| 5167 | Srsf12         | 1.32 | 24    | 1.04   | 16    | 1.37    |   |
| 5168 | Tcirg1         | 1.32 | 36    | 2.93   | 31    | 3.87    |   |
| 5169 | Wdr31          | 1.32 | 16    | 1.87   | 17    | 2.48    |   |
| 5170 | Zfp870         | 1.32 | 12    | 1.64   | 13    | 2.17    |   |
| 5171 | Zkscan5        | 1.32 | 113   | 5.49   | 95    | 7.25    |   |
| 5172 | Ccdc39         | 1.32 | 48    | 0.67   | 44    | 0.89    |   |
| 5173 | Trap1          | 1.32 | 281   | 29.21  | 265   | 38.56   |   |
| 5174 | Gcc2           | 1.32 | 112   | 3.71   | 103   | 4.89    |   |
| 5175 | Cul4b          | 1.32 | 176   | 10.63  | 155   | 14.02   |   |
| 5176 | Hmcn1          | 1.32 | 446   | 5.02   | 411   | 6.62    |   |
| 5177 | Ccdc132        | 1.32 | 122   | 9.16   | 100   | 12.09   |   |
| 5178 | Pip4k2b        | 1.32 | 89    | 8.17   | 65    | 10.77   |   |
| 5179 | Ddi2           | 1.32 | 346   | 7.93   | 310   | 10.45   |   |



Supplemental Table 2  
Vehicle versus FSH, 24 hours

|      | A              | B    | C   | D     | E   | F      | G |
|------|----------------|------|-----|-------|-----|--------|---|
| 5180 | Klhl12         | 1.32 | 86  | 4.14  | 67  | 5.46   |   |
| 5181 | Depdc5         | 1.32 | 182 | 4.21  | 182 | 5.54   |   |
| 5182 | Det1           | 1.32 | 67  | 4.73  | 48  | 6.24   |   |
| 5183 | Slc25a33       | 1.32 | 71  | 7.75  | 64  | 10.21  |   |
| 5184 | Zfp317         | 1.32 | 50  | 5     | 42  | 6.59   |   |
| 5185 | Ctdspl2        | 1.32 | 168 | 8.01  | 154 | 10.55  |   |
| 5186 | Pcolce         | 1.32 | 688 | 98.73 | 611 | 130.02 |   |
| 5187 | Efr3a          | 1.32 | 294 | 13.52 | 266 | 17.8   |   |
| 5188 | Gucd1          | 1.32 | 33  | 18.59 | 32  | 24.48  |   |
| 5189 | Rars2          | 1.32 | 44  | 4.06  | 42  | 5.35   |   |
| 5190 | Eri2           | 1.32 | 37  | 2.31  | 29  | 3.04   |   |
| 5191 | Zfp280b        | 1.32 | 298 | 19.49 | 272 | 25.64  |   |
| 5192 | Sptlc1         | 1.32 | 161 | 7.8   | 160 | 10.26  |   |
| 5193 | Ctage5         | 1.32 | 188 | 11.79 | 140 | 15.51  |   |
| 5194 | Exo5           | 1.31 | 22  | 2.6   | 19  | 3.41   |   |
| 5195 | Gpr137b        | 1.31 | 89  | 2.11  | 80  | 2.78   |   |
| 5196 | Prcp           | 1.31 | 139 | 13.29 | 127 | 17.47  |   |
| 5197 | Ptger1         | 1.31 | 38  | 2.72  | 30  | 3.58   |   |
| 5198 | Sec11c         | 1.31 | 47  | 6.44  | 35  | 8.47   |   |
| 5199 | Tesk2          | 1.31 | 37  | 1.73  | 33  | 2.27   |   |
| 5200 | Gmcl1          | 1.31 | 165 | 8.75  | 139 | 11.5   |   |
| 5201 | Kdm5b          | 1.31 | 595 | 20.82 | 540 | 27.36  |   |
| 5202 | Mtss1          | 1.31 | 179 | 4.69  | 165 | 6.16   |   |
| 5203 | Phf6_2         | 1.31 | 111 | 8.32  | 98  | 10.93  |   |
| 5204 | Tmem209        | 1.31 | 109 | 8.28  | 106 | 10.88  |   |
| 5205 | Sdha           | 1.31 | 362 | 36.44 | 338 | 47.86  |   |
| 5206 | Abt1           | 1.31 | 52  | 10.04 | 42  | 13.18  |   |
| 5207 | Srpk2          | 1.31 | 267 | 12.55 | 235 | 16.48  |   |
| 5208 | Coq3           | 1.31 | 41  | 5.92  | 39  | 7.77   |   |
| 5209 | Melk           | 1.31 | 47  | 2.72  | 38  | 3.57   |   |
| 5210 | Nadsyn1        | 1.31 | 48  | 2.88  | 49  | 3.78   |   |
| 5211 | Rnf20          | 1.31 | 229 | 11.21 | 194 | 14.71  |   |
| 5212 | Dazap2         | 1.31 | 239 | 59.82 | 209 | 78.49  |   |
| 5213 | Id2            | 1.31 | 700 | 85.79 | 633 | 112.51 |   |
| 5214 | Cog1           | 1.31 | 160 | 11.9  | 142 | 15.6   |   |
| 5215 | N4bp1          | 1.31 | 206 | 7.58  | 175 | 9.94   |   |
| 5216 | Erlin2         | 1.31 | 200 | 12.56 | 182 | 16.46  |   |
| 5217 | Lamp2          | 1.31 | 711 | 62.61 | 590 | 82.07  |   |
| 5218 | Zfp646         | 1.31 | 258 | 11.28 | 232 | 14.78  |   |
| 5219 | Cnot7          | 1.31 | 237 | 18.4  | 208 | 24.1   |   |
| 5220 | Faim_2         | 1.31 | 17  | 14.99 | 23  | 19.64  |   |
| 5221 | Arl6ip1        | 1.31 | 315 | 34.14 | 276 | 44.71  |   |
| 5222 | M6pr           | 1.31 | 324 | 56.49 | 271 | 73.97  |   |
| 5223 | Dnajc11        | 1.31 | 250 | 23.27 | 225 | 30.47  |   |
| 5224 | Galnt2         | 1.31 | 904 | 52.27 | 801 | 68.43  |   |
| 5225 | Lrp5           | 1.31 | 519 | 22.77 | 463 | 29.8   |   |
| 5226 | Uri1           | 1.31 | 192 | 10.86 | 186 | 14.21  |   |
| 5227 | RT1-T24-1      | 1.31 | 78  | 2.18  | 71  | 2.85   |   |
| 5228 | AABR07072537.1 | 1.31 | 10  | 0.91  | 9   | 1.19   |   |
| 5229 | Cpt1b          | 1.31 | 10  | 0.66  | 11  | 0.86   |   |
| 5230 | Dera           | 1.31 | 121 | 14.42 | 122 | 18.86  |   |
| 5231 | Dpy19l4        | 1.31 | 101 | 7.05  | 91  | 9.22   |   |
| 5232 | Dscr3          | 1.31 | 160 | 13.06 | 141 | 17.09  |   |
| 5233 | Mblac1         | 1.31 | 10  | 1.97  | 9   | 2.58   |   |

Supplemental Table 2  
Vehicle versus FSH, 24 hours

|      | A              | B    | C    | D      | E    | F      | G |
|------|----------------|------|------|--------|------|--------|---|
| 5234 | Pcdhga5        | 1.31 | 10   | 1.03   | 9    | 1.34   |   |
| 5235 | Pfas           | 1.31 | 367  | 12.06  | 335  | 15.78  |   |
| 5236 | Pgam2          | 1.31 | 24   | 2.86   | 23   | 3.74   |   |
| 5237 | Pyurfl1        | 1.31 | 39   | 4.03   | 36   | 5.27   |   |
| 5238 | Rapsn          | 1.31 | 28   | 1.51   | 16   | 1.97   |   |
| 5239 | RGD1310553     | 1.31 | 72   | 5.1    | 63   | 6.66   |   |
| 5240 | RT1-T24-4      | 1.31 | 7    | 1.52   | 4    | 1.99   |   |
| 5241 | Scoc           | 1.31 | 101  | 13.25  | 89   | 17.33  |   |
| 5242 | Slc17a9        | 1.31 | 41   | 3.28   | 34   | 4.3    |   |
| 5243 | Snopc1         | 1.31 | 53   | 5.65   | 45   | 7.39   |   |
| 5244 | Stk19          | 1.31 | 22   | 3.39   | 20   | 4.44   |   |
| 5245 | AABR07031734.2 | 1.31 | 10   | 1.04   | 9    | 1.36   |   |
| 5246 | Kihl32         | 1.31 | 36   | 1.04   | 37   | 1.36   |   |
| 5247 | LOC100363943   | 1.31 | 16   | 3.48   | 14   | 4.54   |   |
| 5248 | Pi4k2a         | 1.31 | 131  | 17.15  | 133  | 22.43  |   |
| 5249 | Rbm4b_1        | 1.31 | 113  | 19.25  | 106  | 25.16  |   |
| 5250 | Trim37         | 1.31 | 160  | 6.15   | 136  | 8.04   |   |
| 5251 | Serpine2       | 1.31 | 1761 | 193.43 | 1571 | 252.57 |   |
| 5252 | Dhrs7          | 1.31 | 74   | 13.32  | 76   | 17.39  |   |
| 5253 | Gtf3c1         | 1.31 | 819  | 26.74  | 748  | 34.91  |   |
| 5254 | Anapc16        | 1.3  | 80   | 10.45  | 87   | 13.64  |   |
| 5255 | G6pc3          | 1.3  | 103  | 16.6   | 89   | 21.66  |   |
| 5256 | Smpd4          | 1.3  | 150  | 9.17   | 137  | 11.96  |   |
| 5257 | Mkks           | 1.3  | 56   | 3.27   | 44   | 4.27   |   |
| 5258 | Als2           | 1.3  | 283  | 10.4   | 274  | 13.56  |   |
| 5259 | Cul4a          | 1.3  | 615  | 28.69  | 582  | 37.41  |   |
| 5260 | Mlh1           | 1.3  | 106  | 6.22   | 107  | 8.11   |   |
| 5261 | Nosip          | 1.3  | 102  | 10.45  | 96   | 13.63  |   |
| 5262 | Armc5          | 1.3  | 148  | 10.39  | 136  | 13.54  |   |
| 5263 | Phf13          | 1.3  | 158  | 12.14  | 140  | 15.83  |   |
| 5264 | Cyp4f17        | 1.3  | 42   | 1.47   | 41   | 1.92   |   |
| 5265 | Trip13         | 1.3  | 45   | 2.68   | 41   | 3.49   |   |
| 5266 | Fxyd6          | 1.3  | 64   | 8.18   | 55   | 10.66  |   |
| 5267 | Rnf26          | 1.3  | 86   | 9.86   | 78   | 12.84  |   |
| 5268 | Thumpd3        | 1.3  | 124  | 10.95  | 106  | 14.27  |   |
| 5269 | Vrk3           | 1.3  | 114  | 12.56  | 112  | 16.36  |   |
| 5270 | Prpf40b        | 1.3  | 137  | 8.43   | 125  | 10.98  |   |
| 5271 | Rnf10          | 1.3  | 1377 | 80.16  | 1244 | 104.38 |   |
| 5272 | Cct2           | 1.3  | 755  | 92.69  | 684  | 120.69 |   |
| 5273 | Cnpy2          | 1.3  | 155  | 35.95  | 148  | 46.8   |   |
| 5274 | Prmt5          | 1.3  | 173  | 15.9   | 151  | 20.7   |   |
| 5275 | Rabif          | 1.3  | 16   | 5.61   | 23   | 7.3    |   |
| 5276 | Bles03         | 1.3  | 110  | 15.61  | 97   | 20.31  |   |
| 5277 | Mkrn1          | 1.3  | 124  | 7.72   | 104  | 10.03  |   |
| 5278 | Rad52          | 1.3  | 36   | 2.34   | 34   | 3.04   |   |
| 5279 | Suz12          | 1.3  | 108  | 8.52   | 92   | 11.08  |   |
| 5280 | Tmem167a       | 1.3  | 46   | 21.92  | 29   | 28.5   |   |
| 5281 | Hsp90ab1       | 1.3  | 4492 | 477.45 | 4161 | 620.59 |   |
| 5282 | Eif2d          | 1.3  | 185  | 19.93  | 160  | 25.9   |   |
| 5283 | Apeh           | 1.3  | 241  | 19.92  | 217  | 25.89  |   |
| 5284 | Pes1           | 1.3  | 211  | 24.9   | 192  | 32.36  |   |
| 5285 | Iars2          | 1.3  | 224  | 15.01  | 197  | 19.5   |   |
| 5286 | Eef2k          | 1.3  | 99   | 4.15   | 99   | 5.39   |   |
| 5287 | Ptma_1         | 1.3  | 625  | 369.9  | 696  | 480.58 |   |

Supplemental Table 2  
Vehicle versus FSH, 24 hours

|      | A            | B    | C   | D      | E   | F     | G |
|------|--------------|------|-----|--------|-----|-------|---|
| 5288 | Cir1         | 1.3  | 91  | 9.18   | 71  | 11.92 |   |
| 5289 | LOC689574    | 1.3  | 154 | 43.33  | 133 | 56.29 |   |
| 5290 | ltfg1        | 1.3  | 454 | 33.33  | 424 | 43.29 |   |
| 5291 | Dnajc5       | 1.3  | 127 | 21.69  | 101 | 28.16 |   |
| 5292 | Cox7a2l      | 1.3  | 290 | 47.21  | 229 | 61.27 |   |
| 5293 | Klf10        | 1.3  | 60  | 4.66   | 50  | 6.05  |   |
| 5294 | Sar1b        | 1.3  | 159 | 22.08  | 128 | 28.64 |   |
| 5295 | Cdkal1       | 1.3  | 139 | 4.13   | 146 | 5.35  |   |
| 5296 | Igsf10       | 1.3  | 59  | 1.27   | 52  | 1.65  |   |
| 5297 | Akap10       | 1.3  | 131 | 5.33   | 131 | 6.9   |   |
| 5298 | Sephs2       | 1.3  | 91  | 7.98   | 68  | 10.34 |   |
| 5299 | Erap1        | 1.3  | 353 | 16.44  | 303 | 21.3  |   |
| 5300 | Epc1         | 1.3  | 334 | 12.25  | 261 | 15.87 |   |
| 5301 | Fars2        | 1.3  | 138 | 5.92   | 127 | 7.66  |   |
| 5302 | Commd7       | 1.3  | 67  | 11.98  | 51  | 15.51 |   |
| 5303 | Mff_2        | 1.29 | 136 | 63.86  | 167 | 82.69 |   |
| 5304 | Bin3         | 1.29 | 100 | 8.86   | 89  | 11.47 |   |
| 5305 | Sra1         | 1.29 | 128 | 25.01  | 108 | 32.37 |   |
| 5306 | Tm2d1        | 1.29 | 140 | 9.64   | 109 | 12.48 |   |
| 5307 | Phtf2        | 1.29 | 181 | 6.63   | 141 | 8.58  |   |
| 5308 | LOC100364912 | 1.29 | 75  | 8.51   | 66  | 11.01 |   |
| 5309 | Atf2         | 1.29 | 204 | 10.11  | 189 | 13.07 |   |
| 5310 | Ppp1r10      | 1.29 | 289 | 15.83  | 247 | 20.47 |   |
| 5311 | Cerk         | 1.29 | 200 | 11.02  | 180 | 14.25 |   |
| 5312 | Vps39        | 1.29 | 353 | 10.7   | 251 | 13.84 |   |
| 5313 | Crebrf       | 1.29 | 142 | 3.81   | 120 | 4.92  |   |
| 5314 | Rbm42        | 1.29 | 208 | 28.06  | 187 | 36.27 |   |
| 5315 | Ptpa         | 1.29 | 334 | 18.28  | 275 | 23.63 |   |
| 5316 | Ndufb8       | 1.29 | 314 | 105.32 | 273 | 136.1 |   |
| 5317 | Ncor2        | 1.29 | 722 | 17.51  | 650 | 22.62 |   |
| 5318 | Amh          | 1.29 | 9   | 1.35   | 8   | 1.74  |   |
| 5319 | Dtwd1        | 1.29 | 15  | 1.44   | 13  | 1.86  |   |
| 5320 | Fam184a      | 1.29 | 72  | 1.93   | 53  | 2.49  |   |
| 5321 | Mcm3         | 1.29 | 188 | 15.3   | 165 | 19.76 |   |
| 5322 | Nphp1        | 1.29 | 85  | 5      | 86  | 6.46  |   |
| 5323 | Ppp2r5b      | 1.29 | 109 | 9.19   | 105 | 11.87 |   |
| 5324 | Rbm39        | 1.29 | 0   | 2.27   | 1   | 2.93  |   |
| 5325 | Tex261       | 1.29 | 145 | 32.25  | 124 | 41.66 |   |
| 5326 | Tmem141      | 1.29 | 37  | 8.62   | 31  | 11.14 |   |
| 5327 | Ttc7a        | 1.29 | 60  | 2      | 48  | 2.59  |   |
| 5328 | Ttyh1        | 1.29 | 22  | 1.46   | 22  | 1.88  |   |
| 5329 | B3galt1      | 1.29 | 8   | 0.84   | 9   | 1.08  |   |
| 5330 | Caap1        | 1.29 | 59  | 2.97   | 50  | 3.83  |   |
| 5331 | Coq4         | 1.29 | 32  | 2.85   | 22  | 3.68  |   |
| 5332 | Jam2         | 1.29 | 44  | 5.72   | 33  | 7.39  |   |
| 5333 | LOC102551435 | 1.29 | 20  | 1.95   | 12  | 2.52  |   |
| 5334 | Pdia5        | 1.29 | 157 | 12.9   | 125 | 16.67 |   |
| 5335 | Plag1        | 1.29 | 9   | 0.67   | 9   | 0.87  |   |
| 5336 | Ptgs2        | 1.29 | 9   | 0.51   | 8   | 0.66  |   |
| 5337 | Speg         | 1.29 | 13  | 0.19   | 14  | 0.24  |   |
| 5338 | Wdr82        | 1.29 | 251 | 32.24  | 201 | 41.64 |   |
| 5339 | Xrcc3        | 1.29 | 94  | 2.14   | 41  | 2.76  |   |
| 5340 | Tspan31      | 1.29 | 265 | 33.26  | 233 | 42.94 |   |
| 5341 | Trpc4ap      | 1.29 | 684 | 46.11  | 595 | 59.52 |   |

Supplemental Table 2  
Vehicle versus FSH, 24 hours

|      | A            | B    | C    | D      | E    | F      | G |
|------|--------------|------|------|--------|------|--------|---|
| 5342 | Arid2        | 1.29 | 518  | 14.8   | 453  | 19.1   |   |
| 5343 | Mt-nd5       | 1.29 | 3448 | 489.48 | 3024 | 631.74 |   |
| 5344 | Neurl4       | 1.29 | 238  | 10.71  | 207  | 13.81  |   |
| 5345 | Smu1         | 1.29 | 218  | 26.86  | 188  | 34.65  |   |
| 5346 | Zfp280d      | 1.29 | 174  | 5.56   | 160  | 7.18   |   |
| 5347 | Ppp1r9b      | 1.29 | 181  | 9.84   | 165  | 12.69  |   |
| 5348 | Pdhb         | 1.29 | 188  | 18.81  | 164  | 24.26  |   |
| 5349 | Hyou1        | 1.29 | 1535 | 80.72  | 1343 | 104.08 |   |
| 5350 | Polrmt       | 1.29 | 64   | 4.13   | 59   | 5.32   |   |
| 5351 | Abcg3l3      | 1.29 | 248  | 7.97   | 181  | 10.27  |   |
| 5352 | Clk1         | 1.29 | 396  | 37.22  | 358  | 47.96  |   |
| 5353 | Ttyh3        | 1.29 | 545  | 26.92  | 483  | 34.69  |   |
| 5354 | Sirt6        | 1.29 | 115  | 14.51  | 98   | 18.69  |   |
| 5355 | Snx15        | 1.29 | 57   | 6.64   | 52   | 8.56   |   |
| 5356 | Zfp280c      | 1.29 | 67   | 3.24   | 51   | 4.18   |   |
| 5357 | Ficd         | 1.29 | 132  | 9.62   | 111  | 12.39  |   |
| 5358 | Ifngr1       | 1.29 | 192  | 20.79  | 159  | 26.76  |   |
| 5359 | Inpp5k       | 1.29 | 93   | 12.55  | 84   | 16.16  |   |
| 5360 | Psmg1        | 1.29 | 92   | 19.61  | 73   | 25.24  |   |
| 5361 | Tecpr1       | 1.29 | 181  | 7.64   | 159  | 9.84   |   |
| 5362 | Pofut2       | 1.29 | 356  | 37.72  | 316  | 48.56  |   |
| 5363 | F8a1         | 1.29 | 35   | 5.76   | 31   | 7.41   |   |
| 5364 | Kif2c        | 1.29 | 43   | 3.01   | 43   | 3.87   |   |
| 5365 | Ppp1r21      | 1.29 | 85   | 5.6    | 80   | 7.2    |   |
| 5366 | LOC100910143 | 1.29 | 0    | 1.66   | 0    | 2.13   |   |
| 5367 | Lysmd1       | 1.29 | 37   | 4.27   | 31   | 5.49   |   |
| 5368 | Tgfbrap1     | 1.29 | 133  | 4.67   | 117  | 6.01   |   |
| 5369 | Vegfb        | 1.29 | 48   | 4.88   | 39   | 6.28   |   |
| 5370 | Med6         | 1.29 | 47   | 8.03   | 43   | 10.34  |   |
| 5371 | 09/02/15     | 1.29 | 185  | 16.25  | 154  | 20.9   |   |
| 5372 | Maged1       | 1.29 | 1549 | 115.26 | 1369 | 148.32 |   |
| 5373 | RGD1310352   | 1.29 | 636  | 64     | 557  | 82.33  |   |
| 5374 | Dcaf5        | 1.29 | 300  | 9.47   | 244  | 12.19  |   |
| 5375 | Atp7a        | 1.29 | 188  | 6.95   | 175  | 8.94   |   |
| 5376 | Ccdc97       | 1.29 | 148  | 11.74  | 129  | 15.1   |   |
| 5377 | Ndufs8       | 1.29 | 142  | 46.3   | 122  | 59.54  |   |
| 5378 | Ccdc62       | 1.29 | 91   | 2.26   | 95   | 2.9    |   |
| 5379 | Fbxo34       | 1.29 | 140  | 5.85   | 114  | 7.52   |   |
| 5380 | Ppcs         | 1.29 | 27   | 3.76   | 26   | 4.83   |   |
| 5381 | Mrp63        | 1.29 | 26   | 3.93   | 23   | 5.05   |   |
| 5382 | Rbpj_2       | 1.29 | 547  | 33.78  | 472  | 43.42  |   |
| 5383 | Xpo5         | 1.28 | 440  | 20.53  | 397  | 26.38  |   |
| 5384 | Tmem230      | 1.28 | 212  | 29.89  | 188  | 38.4   |   |
| 5385 | Sec23ip      | 1.28 | 376  | 18.99  | 331  | 24.4   |   |
| 5386 | Tm9sf4       | 1.28 | 319  | 24.51  | 261  | 31.47  |   |
| 5387 | Fn3krp       | 1.28 | 64   | 5.93   | 58   | 7.61   |   |
| 5388 | Pdrg1        | 1.28 | 63   | 12.54  | 57   | 16.1   |   |
| 5389 | Tp53bp1      | 1.28 | 363  | 12.54  | 331  | 16.1   |   |
| 5390 | Rexo1        | 1.28 | 271  | 11.96  | 226  | 15.34  |   |
| 5391 | Ninj1        | 1.28 | 182  | 36.73  | 152  | 47.13  |   |
| 5392 | Proser1      | 1.28 | 123  | 6.24   | 113  | 8.01   |   |
| 5393 | Mvb12b       | 1.28 | 286  | 12.87  | 254  | 16.5   |   |
| 5394 | Ccdc12       | 1.28 | 70   | 15.63  | 68   | 20.04  |   |
| 5395 | Celsr1       | 1.28 | 66   | 1.43   | 52   | 1.83   |   |

Supplemental Table 2  
Vehicle versus FSH, 24 hours

|      | A              | B    | C    | D      | E    | F      | G |
|------|----------------|------|------|--------|------|--------|---|
| 5396 | Dusp11_1       | 1.28 | 0    | 3.3    | 0    | 4.23   |   |
| 5397 | Ercc2          | 1.28 | 75   | 5.94   | 63   | 7.62   |   |
| 5398 | Fam103a1       | 1.28 | 18   | 5.36   | 16   | 6.87   |   |
| 5399 | Kcnb1          | 1.28 | 25   | 1.27   | 21   | 1.63   |   |
| 5400 | Rnf34          | 1.28 | 98   | 8.64   | 83   | 11.08  |   |
| 5401 | Stx2           | 1.28 | 120  | 6.48   | 83   | 8.3    |   |
| 5402 | Yod1           | 1.28 | 22   | 2.68   | 19   | 3.44   |   |
| 5403 | Zfp217         | 1.28 | 95   | 5.72   | 79   | 7.34   |   |
| 5404 | Odf2l          | 1.28 | 30   | 1.11   | 26   | 1.43   |   |
| 5405 | Bckdk          | 1.28 | 242  | 24.76  | 222  | 31.73  |   |
| 5406 | Unc50          | 1.28 | 159  | 23.43  | 134  | 30.02  |   |
| 5407 | Fbxo38         | 1.28 | 235  | 11.55  | 212  | 14.8   |   |
| 5408 | Adam15         | 1.28 | 190  | 15.3   | 165  | 19.6   |   |
| 5409 | Pign           | 1.28 | 126  | 5.9    | 120  | 7.56   |   |
| 5410 | Kdm6b          | 1.28 | 250  | 13.95  | 202  | 17.88  |   |
| 5411 | RGD1303003     | 1.28 | 128  | 23.04  | 114  | 29.51  |   |
| 5412 | Ap1m1          | 1.28 | 297  | 30.45  | 263  | 39     |   |
| 5413 | Rint1          | 1.28 | 101  | 6.66   | 70   | 8.53   |   |
| 5414 | Stk35          | 1.28 | 83   | 4.33   | 58   | 5.55   |   |
| 5415 | Atrn           | 1.28 | 807  | 19.22  | 689  | 24.61  |   |
| 5416 | AABR07009397.1 | 1.28 | 3    | 13.56  | 3    | 17.35  |   |
| 5417 | Asna1          | 1.28 | 243  | 38.63  | 203  | 49.42  |   |
| 5418 | RGD1307155     | 1.28 | 35   | 4.67   | 27   | 5.97   |   |
| 5419 | Nek8           | 1.28 | 34   | 2.38   | 30   | 3.04   |   |
| 5420 | Ociad1         | 1.28 | 318  | 41.62  | 272  | 53.22  |   |
| 5421 | Zfp729a        | 1.28 | 34   | 2.66   | 38   | 3.4    |   |
| 5422 | Elk1           | 1.28 | 169  | 15.01  | 158  | 19.19  |   |
| 5423 | Fbf1           | 1.28 | 119  | 4.64   | 104  | 5.93   |   |
| 5424 | Tut1           | 1.28 | 99   | 7.21   | 90   | 9.21   |   |
| 5425 | Crbn           | 1.28 | 65   | 6.4    | 61   | 8.18   |   |
| 5426 | RGD1310951     | 1.28 | 249  | 12.04  | 243  | 15.38  |   |
| 5427 | Trim41         | 1.28 | 166  | 10.5   | 141  | 13.42  |   |
| 5428 | Dph1           | 1.28 | 83   | 9.91   | 48   | 12.67  |   |
| 5429 | Hmg20b         | 1.28 | 104  | 13.53  | 109  | 17.28  |   |
| 5430 | Fbxl4          | 1.28 | 61   | 2.53   | 55   | 3.22   |   |
| 5431 | Exoc7_2        | 1.28 | 3    | 7.89   | 3    | 10.07  |   |
| 5432 | Nadk2          | 1.28 | 63   | 2.32   | 53   | 2.96   |   |
| 5433 | Pik3cd         | 1.28 | 1399 | 63.07  | 1194 | 80.54  |   |
| 5434 | Epb41l3        | 1.28 | 135  | 5.29   | 126  | 6.75   |   |
| 5435 | Sos1           | 1.28 | 284  | 8.66   | 239  | 11.05  |   |
| 5436 | Gtf2h4         | 1.28 | 41   | 5.32   | 38   | 6.79   |   |
| 5437 | Uap1l1         | 1.28 | 46   | 3.79   | 42   | 4.83   |   |
| 5438 | Atp5sl         | 1.28 | 47   | 5.07   | 50   | 6.47   |   |
| 5439 | Rps29_2        | 1.28 | 103  | 273.67 | 100  | 349.01 |   |
| 5440 | Adck2          | 1.28 | 56   | 4.87   | 50   | 6.21   |   |
| 5441 | Dnaja3         | 1.27 | 131  | 13.74  | 125  | 17.51  |   |
| 5442 | Ulk2           | 1.27 | 362  | 10.03  | 292  | 12.78  |   |
| 5443 | Ing1           | 1.27 | 81   | 10.93  | 71   | 13.92  |   |
| 5444 | Ctnnb1         | 1.27 | 1374 | 138.53 | 1190 | 176.44 |   |
| 5445 | Vapa           | 1.27 | 466  | 52.4   | 394  | 66.72  |   |
| 5446 | Psmb2          | 1.27 | 254  | 63.7   | 215  | 81.1   |   |
| 5447 | Gltscr2        | 1.27 | 256  | 35.37  | 221  | 45.02  |   |
| 5448 | Ssr4           | 1.27 | 142  | 46.63  | 123  | 59.36  |   |
| 5449 | Tfip11         | 1.27 | 182  | 11.46  | 147  | 14.59  |   |

Supplemental Table 2  
Vehicle versus FSH, 24 hours

|      | A              | B    | C     | D       | E     | F       | G |
|------|----------------|------|-------|---------|-------|---------|---|
| 5450 | Atp6v0d1       | 1.27 | 447   | 58.19   | 382   | 74.02   |   |
| 5451 | Cenpl          | 1.27 | 31    | 2.71    | 21    | 3.45    |   |
| 5452 | Ercc3          | 1.27 | 175   | 14.94   | 153   | 19      |   |
| 5453 | Gsk3a          | 1.27 | 386   | 34.18   | 297   | 43.46   |   |
| 5454 | LOC100912399_2 | 1.27 | 0     | 0.5     | 0     | 0.64    |   |
| 5455 | Nup37          | 1.27 | 40    | 2.39    | 31    | 3.04    |   |
| 5456 | Peli3          | 1.27 | 11    | 0.34    | 9     | 0.43    |   |
| 5457 | Thap2          | 1.27 | 16    | 3.05    | 16    | 3.88    |   |
| 5458 | AABR07028012.1 | 1.27 | 13    | 4.37    | 13    | 5.56    |   |
| 5459 | AABR07030729.1 | 1.27 | 1     | 1.99    | 1     | 2.53    |   |
| 5460 | AC120712.2     | 1.27 | 20    | 2.26    | 8     | 2.87    |   |
| 5461 | Arl15          | 1.27 | 108   | 3.26    | 82    | 4.14    |   |
| 5462 | Bora           | 1.27 | 31    | 1.75    | 33    | 2.22    |   |
| 5463 | Echdc2         | 1.27 | 9     | 1.43    | 8     | 1.82    |   |
| 5464 | Fcf1           | 1.27 | 103   | 25.78   | 86    | 32.77   |   |
| 5465 | Gipc2          | 1.27 | 15    | 1.59    | 13    | 2.03    |   |
| 5466 | Il4i1          | 1.27 | 16    | 1.02    | 15    | 1.29    |   |
| 5467 | lqce           | 1.27 | 64    | 3.31    | 63    | 4.21    |   |
| 5468 | LOC100910164   | 1.27 | 1     | 2.27    | 1     | 2.88    |   |
| 5469 | Lrrc48         | 1.27 | 32    | 1.1     | 26    | 1.4     |   |
| 5470 | Mapt           | 1.27 | 16    | 0.32    | 12    | 0.4     |   |
| 5471 | Nt5dc1         | 1.27 | 74    | 3.71    | 71    | 4.72    |   |
| 5472 | Pkd1l3         | 1.27 | 302   | 0.3     | 461   | 0.38    |   |
| 5473 | Plcl1          | 1.27 | 44    | 2.11    | 39    | 2.68    |   |
| 5474 | Rcbtb1         | 1.27 | 169   | 5.81    | 137   | 7.38    |   |
| 5475 | Rn60_10_0702.4 | 1.27 | 20    | 2.04    | 19    | 2.6     |   |
| 5476 | Sliitrk2       | 1.27 | 25    | 2.03    | 24    | 2.58    |   |
| 5477 | Snx17          | 1.27 | 192   | 22.96   | 165   | 29.2    |   |
| 5478 | Ttc23          | 1.27 | 102   | 6.71    | 102   | 8.53    |   |
| 5479 | Med24          | 1.27 | 230   | 14.43   | 205   | 18.34   |   |
| 5480 | Hectd4         | 1.27 | 444   | 7.45    | 379   | 9.47    |   |
| 5481 | Fubp3          | 1.27 | 296   | 21.82   | 242   | 27.72   |   |
| 5482 | Drg1           | 1.27 | 168   | 20.93   | 134   | 26.59   |   |
| 5483 | Snrk           | 1.27 | 142   | 8.24    | 133   | 10.46   |   |
| 5484 | Srrm2          | 1.27 | 3885  | 115.33  | 3413  | 146.41  |   |
| 5485 | Atg2b          | 1.27 | 287   | 6.73    | 247   | 8.54    |   |
| 5486 | Ints7          | 1.27 | 211   | 12.7    | 193   | 16.12   |   |
| 5487 | Ddx39b         | 1.27 | 359   | 51.87   | 330   | 65.84   |   |
| 5488 | Sf3b3          | 1.27 | 730   | 37.16   | 625   | 47.17   |   |
| 5489 | Syne2          | 1.27 | 1605  | 16.78   | 1476  | 21.3    |   |
| 5490 | Vps16          | 1.27 | 181   | 15.05   | 151   | 19.1    |   |
| 5491 | Spg7           | 1.27 | 266   | 12.7    | 225   | 16.11   |   |
| 5492 | AABR07034742.1 | 1.27 | 150   | 41.48   | 157   | 52.64   |   |
| 5493 | Ccp110         | 1.27 | 86    | 3.62    | 77    | 4.6     |   |
| 5494 | Mt-cox3        | 1.27 | 10241 | 3271.25 | 8904  | 4150.86 |   |
| 5495 | Tmx1           | 1.27 | 289   | 35.27   | 256   | 44.74   |   |
| 5496 | Prkcd          | 1.27 | 389   | 29.42   | 331   | 37.32   |   |
| 5497 | Ern1           | 1.27 | 301   | 8.5     | 239   | 10.78   |   |
| 5498 | Ttc9c          | 1.27 | 142   | 14.66   | 124   | 18.6    |   |
| 5499 | Sumo3          | 1.27 | 264   | 38.59   | 235   | 48.92   |   |
| 5500 | Spryd4         | 1.27 | 48    | 7.92    | 43    | 10.04   |   |
| 5501 | Tmem50a        | 1.27 | 208   | 43.25   | 182   | 54.82   |   |
| 5502 | Zfp706         | 1.27 | 191   | 18.68   | 165   | 23.67   |   |
| 5503 | LOC100909555   | 1.27 | 41269 | 2149.82 | 36245 | 2723.77 |   |

Supplemental Table 2  
Vehicle versus FSH, 24 hours

|      | A            | B    | C   | D      | E   | F      | G |
|------|--------------|------|-----|--------|-----|--------|---|
| 5504 | Map3k12      | 1.27 | 180 | 11.33  | 165 | 14.36  |   |
| 5505 | Stk16        | 1.27 | 86  | 13.13  | 74  | 16.64  |   |
| 5506 | Tubb3        | 1.27 | 535 | 71.49  | 457 | 90.52  |   |
| 5507 | Klhl13       | 1.27 | 102 | 7.88   | 94  | 9.98   |   |
| 5508 | Pcm1         | 1.27 | 420 | 11.52  | 379 | 14.58  |   |
| 5509 | Ptbp3        | 1.27 | 390 | 26.65  | 325 | 33.73  |   |
| 5510 | Wdr13        | 1.27 | 96  | 10.21  | 68  | 12.92  |   |
| 5511 | Ylpm1        | 1.27 | 406 | 10.2   | 380 | 12.91  |   |
| 5512 | Fbxo42       | 1.26 | 216 | 7.55   | 189 | 9.55   |   |
| 5513 | Gatad2a      | 1.26 | 531 | 23.55  | 477 | 29.79  |   |
| 5514 | Mcart1_1     | 1.26 | 13  | 6.26   | 15  | 7.92   |   |
| 5515 | Atg16l1      | 1.26 | 203 | 9.88   | 164 | 12.49  |   |
| 5516 | Lage3        | 1.26 | 76  | 25.82  | 66  | 32.65  |   |
| 5517 | Trim33       | 1.26 | 237 | 12.84  | 219 | 16.23  |   |
| 5518 | Tspan5       | 1.26 | 270 | 10.75  | 219 | 13.59  |   |
| 5519 | Scamp2       | 1.26 | 303 | 30.37  | 273 | 38.38  |   |
| 5520 | Donson       | 1.26 | 36  | 2.59   | 27  | 3.27   |   |
| 5521 | Fam76a       | 1.26 | 45  | 4.58   | 47  | 5.79   |   |
| 5522 | Tsc22d4_2    | 1.26 | 0   | 4.81   | 0   | 6.08   |   |
| 5523 | Vwa5a_1      | 1.26 | 1   | 6.06   | 2   | 7.65   |   |
| 5524 | LOC306766    | 1.26 | 224 | 19.48  | 188 | 24.61  |   |
| 5525 | Nt5c         | 1.26 | 28  | 7.33   | 23  | 9.26   |   |
| 5526 | Jund         | 1.26 | 635 | 94.38  | 551 | 119.25 |   |
| 5527 | Il6st        | 1.26 | 330 | 25.14  | 277 | 31.76  |   |
| 5528 | Exoc2        | 1.26 | 178 | 14.75  | 172 | 18.64  |   |
| 5529 | Srsf6        | 1.26 | 546 | 33.62  | 459 | 42.46  |   |
| 5530 | Pabpn1       | 1.26 | 491 | 56.72  | 451 | 71.64  |   |
| 5531 | Gga2         | 1.26 | 105 | 7.45   | 87  | 9.41   |   |
| 5532 | Rae1         | 1.26 | 179 | 23.54  | 149 | 29.72  |   |
| 5533 | Dhx9         | 1.26 | 631 | 35.26  | 534 | 44.52  |   |
| 5534 | Adnp         | 1.26 | 699 | 25.75  | 589 | 32.5   |   |
| 5535 | Mettl5       | 1.26 | 49  | 8.76   | 51  | 11.05  |   |
| 5536 | Tmcc3        | 1.26 | 210 | 4.76   | 166 | 6      |   |
| 5537 | Aldh1a1      | 1.26 | 544 | 59.89  | 476 | 75.53  |   |
| 5538 | Mfsd1        | 1.26 | 156 | 15.59  | 135 | 19.66  |   |
| 5539 | Minos1       | 1.26 | 216 | 67.1   | 179 | 84.6   |   |
| 5540 | Cdan1        | 1.26 | 110 | 5.57   | 83  | 7.02   |   |
| 5541 | Ctnnb1       | 1.26 | 178 | 16.93  | 171 | 21.33  |   |
| 5542 | Gtf3c2       | 1.26 | 357 | 18.57  | 307 | 23.4   |   |
| 5543 | Elmsan1      | 1.26 | 181 | 5.39   | 167 | 6.79   |   |
| 5544 | Cdkn1c       | 1.26 | 17  | 1.83   | 13  | 2.31   |   |
| 5545 | Cep126       | 1.26 | 38  | 0.9    | 37  | 1.14   |   |
| 5546 | Frk          | 1.26 | 70  | 3.27   | 63  | 4.12   |   |
| 5547 | LOC100911918 | 1.26 | 29  | 2.14   | 15  | 2.69   |   |
| 5548 | Mutyh        | 1.26 | 37  | 4.48   | 45  | 5.64   |   |
| 5549 | Rab33a       | 1.26 | 20  | 2.75   | 18  | 3.47   |   |
| 5550 | Tex264       | 1.26 | 148 | 19.39  | 133 | 24.42  |   |
| 5551 | Timm44       | 1.26 | 140 | 14.67  | 114 | 18.48  |   |
| 5552 | Tmed10       | 1.26 | 611 | 113.35 | 528 | 142.74 |   |
| 5553 | Tmem192      | 1.26 | 53  | 4.95   | 45  | 6.23   |   |
| 5554 | Usp40        | 1.26 | 123 | 10.06  | 128 | 12.67  |   |
| 5555 | Ndufa9       | 1.26 | 281 | 41.83  | 230 | 52.68  |   |
| 5556 | LOC686442    | 1.26 | 193 | 91.72  | 172 | 115.46 |   |
| 5557 | Gdi1         | 1.26 | 985 | 97.87  | 879 | 123.2  |   |

Supplemental Table 2  
Vehicle versus FSH, 24 hours

|      | A               | B    | C    | D      | E    | F      | G |
|------|-----------------|------|------|--------|------|--------|---|
| 5558 | Otub1           | 1.26 | 325  | 46.38  | 273  | 58.38  |   |
| 5559 | Decr2           | 1.26 | 102  | 5.12   | 93   | 6.45   |   |
| 5560 | Ndufs3          | 1.26 | 177  | 34.89  | 154  | 43.9   |   |
| 5561 | Fzr1            | 1.26 | 129  | 16.54  | 117  | 20.8   |   |
| 5562 | Ints3           | 1.26 | 327  | 15.9   | 294  | 20     |   |
| 5563 | Arhgap12        | 1.26 | 249  | 8.71   | 219  | 10.95  |   |
| 5564 | Arnt            | 1.26 | 215  | 17.44  | 205  | 21.93  |   |
| 5565 | Glce            | 1.26 | 165  | 8.23   | 141  | 10.35  |   |
| 5566 | Oxr1            | 1.26 | 230  | 7.57   | 176  | 9.52   |   |
| 5567 | Aplp1           | 1.26 | 527  | 55.71  | 451  | 70.04  |   |
| 5568 | Parp1           | 1.26 | 434  | 26.61  | 378  | 33.45  |   |
| 5569 | RGD1564379      | 1.26 | 82   | 7.52   | 82   | 9.45   |   |
| 5570 | LOC500034       | 1.26 | 61   | 6.59   | 42   | 8.29   |   |
| 5571 | Tbp             | 1.26 | 81   | 7.87   | 72   | 9.89   |   |
| 5572 | Zfp131          | 1.26 | 157  | 12.13  | 122  | 15.24  |   |
| 5573 | Ccdc71          | 1.26 | 86   | 12.31  | 71   | 15.46  |   |
| 5574 | Nfe2l1          | 1.26 | 1761 | 91.45  | 1475 | 114.84 |   |
| 5575 | Csk             | 1.26 | 207  | 19.75  | 176  | 24.8   |   |
| 5576 | Mfsd5           | 1.26 | 104  | 14.8   | 89   | 18.58  |   |
| 5577 | Abhd1           | 1.25 | 18   | 1.07   | 13   | 1.34   |   |
| 5578 | Gtpbp2          | 1.25 | 120  | 6.06   | 98   | 7.61   |   |
| 5579 | Nelfb           | 1.25 | 346  | 25.85  | 275  | 32.44  |   |
| 5580 | Oxnad1          | 1.25 | 82   | 3.96   | 79   | 4.97   |   |
| 5581 | Yaf2            | 1.25 | 115  | 9.37   | 82   | 11.76  |   |
| 5582 | Zfp397          | 1.25 | 25   | 2.66   | 22   | 3.34   |   |
| 5583 | Mettl25         | 1.25 | 56   | 2.41   | 48   | 3.03   |   |
| 5584 | Zdhhc16         | 1.25 | 123  | 13.11  | 111  | 16.45  |   |
| 5585 | Nip30           | 1.25 | 152  | 14.84  | 120  | 18.6   |   |
| 5586 | Bap1            | 1.25 | 412  | 26.11  | 343  | 32.72  |   |
| 5587 | Parp6           | 1.25 | 210  | 12.51  | 179  | 15.68  |   |
| 5588 | Dlg5            | 1.25 | 237  | 8.97   | 216  | 11.25  |   |
| 5589 | Kdm2a           | 1.25 | 632  | 21.38  | 557  | 26.8   |   |
| 5590 | Tada2b          | 1.25 | 163  | 9.63   | 126  | 12.07  |   |
| 5591 | AC108574.2      | 1.25 | 106  | 9.28   | 94   | 11.63  |   |
| 5592 | Alg14           | 1.25 | 91   | 9.58   | 75   | 12     |   |
| 5593 | Klhl22          | 1.25 | 222  | 15.23  | 182  | 19.08  |   |
| 5594 | LOC100911625    | 1.25 | 0    | 3.07   | 0    | 3.84   |   |
| 5595 | Arhgef10l       | 1.25 | 190  | 9.02   | 160  | 11.3   |   |
| 5596 | Tmem64          | 1.25 | 30   | 6.34   | 28   | 7.94   |   |
| 5597 | Adh4            | 1.25 | 195  | 8.87   | 173  | 11.11  |   |
| 5598 | Cdk5rap2        | 1.25 | 217  | 7.44   | 205  | 9.31   |   |
| 5599 | Dhrs7b          | 1.25 | 116  | 12.05  | 99   | 15.09  |   |
| 5600 | Crtc3           | 1.25 | 456  | 8.22   | 360  | 10.28  |   |
| 5601 | Ddah2           | 1.25 | 225  | 49.24  | 215  | 61.62  |   |
| 5602 | Gm12258         | 1.25 | 76   | 4.35   | 63   | 5.45   |   |
| 5603 | Siva1           | 1.25 | 47   | 5.08   | 36   | 6.35   |   |
| 5604 | Tmem55b         | 1.25 | 119  | 16.49  | 95   | 20.63  |   |
| 5605 | Prmt1           | 1.25 | 118  | 123.18 | 82   | 154.1  |   |
| 5606 | Pias4           | 1.25 | 102  | 6.59   | 83   | 8.24   |   |
| 5607 | Rabep2          | 1.25 | 97   | 7.29   | 81   | 9.12   |   |
| 5608 | Tfe3            | 1.25 | 91   | 11.43  | 78   | 14.3   |   |
| 5609 | ENSRNOG00000059 | 1.25 | 146  | 7.69   | 119  | 9.62   |   |
| 5610 | Hexa            | 1.25 | 376  | 47.8   | 315  | 59.74  |   |
| 5611 | Pcdh9           | 1.25 | 100  | 7.14   | 86   | 8.92   |   |



Supplemental Table 2  
Vehicle versus FSH, 24 hours

|      | A              | B    | C   | D     | E   | F     | G |
|------|----------------|------|-----|-------|-----|-------|---|
| 5612 | Edc4           | 1.25 | 348 | 15.83 | 292 | 19.78 |   |
| 5613 | Sfr1           | 1.25 | 175 | 27.99 | 156 | 34.97 |   |
| 5614 | Slc30a1        | 1.25 | 165 | 16.99 | 145 | 21.22 |   |
| 5615 | Ppfia1         | 1.25 | 190 | 9.27  | 155 | 11.57 |   |
| 5616 | Gatc           | 1.25 | 94  | 10.84 | 98  | 13.53 |   |
| 5617 | Plekha7        | 1.25 | 162 | 4.64  | 164 | 5.79  |   |
| 5618 | Stk38          | 1.25 | 167 | 15.42 | 163 | 19.23 |   |
| 5619 | Strbp          | 1.25 | 134 | 7.55  | 114 | 9.41  |   |
| 5620 | Cachd1         | 1.25 | 123 | 6.92  | 96  | 8.64  |   |
| 5621 | Cep164         | 1.25 | 145 | 6.09  | 125 | 7.6   |   |
| 5622 | Tpcn1          | 1.25 | 122 | 6.76  | 108 | 8.43  |   |
| 5623 | Ehmt1          | 1.25 | 488 | 13.99 | 415 | 17.44 |   |
| 5624 | AABR07050399.1 | 1.25 | 0   | 5.78  | 0   | 7.21  |   |
| 5625 | Coil           | 1.25 | 38  | 2.01  | 36  | 2.5   |   |
| 5626 | Med17          | 1.25 | 82  | 8.03  | 69  | 10.01 |   |
| 5627 | Mfsd9          | 1.25 | 24  | 1.67  | 21  | 2.08  |   |
| 5628 | AC098750.6     | 1.25 | 33  | 1.82  | 25  | 2.27  |   |
| 5629 | Angel2         | 1.25 | 136 | 8.87  | 122 | 11.05 |   |
| 5630 | Cdc25b         | 1.25 | 22  | 1.87  | 21  | 2.33  |   |
| 5631 | Cdon           | 1.25 | 76  | 2.55  | 65  | 3.17  |   |
| 5632 | Cenpm          | 1.25 | 11  | 1.25  | 15  | 1.56  |   |
| 5633 | Cryz11         | 1.25 | 71  | 3.82  | 65  | 4.75  |   |
| 5634 | Cstb           | 1.25 | 201 | 76.31 | 169 | 95.04 |   |
| 5635 | Exoc7_1        | 1.25 | 0   | 2.67  | 0   | 3.32  |   |
| 5636 | Fra10ac1       | 1.25 | 39  | 1.74  | 20  | 2.16  |   |
| 5637 | Gpld1          | 1.25 | 20  | 0.55  | 14  | 0.68  |   |
| 5638 | Gps2           | 1.25 | 77  | 12.87 | 65  | 16.03 |   |
| 5639 | Igsf9b         | 1.25 | 21  | 0.87  | 14  | 1.09  |   |
| 5640 | Il17re         | 1.25 | 36  | 2.26  | 26  | 2.82  |   |
| 5641 | LOC100158225   | 1.25 | 24  | 2.39  | 20  | 2.98  |   |
| 5642 | Med27          | 1.25 | 165 | 15.32 | 149 | 19.09 |   |
| 5643 | Mre11a         | 1.25 | 137 | 4.85  | 117 | 6.04  |   |
| 5644 | Msra           | 1.25 | 33  | 2.5   | 27  | 3.12  |   |
| 5645 | Pacrgl         | 1.25 | 9   | 1.06  | 13  | 1.32  |   |
| 5646 | Pbld1          | 1.25 | 7   | 0.86  | 9   | 1.07  |   |
| 5647 | Pex3           | 1.25 | 66  | 5.31  | 51  | 6.62  |   |
| 5648 | Plekha6        | 1.25 | 8   | 0.3   | 9   | 0.37  |   |
| 5649 | Rad1           | 1.25 | 19  | 2.56  | 13  | 3.19  |   |
| 5650 | RGD1310769     | 1.25 | 84  | 10.36 | 69  | 12.91 |   |
| 5651 | RGD1562037     | 1.25 | 86  | 4.26  | 69  | 5.31  |   |
| 5652 | RGD1566136     | 1.25 | 4   | 3     | 5   | 3.73  |   |
| 5653 | Rnf182         | 1.25 | 14  | 1.43  | 12  | 1.78  |   |
| 5654 | Shf            | 1.25 | 58  | 5.18  | 51  | 6.45  |   |
| 5655 | Slc2a10        | 1.25 | 46  | 2.12  | 32  | 2.64  |   |
| 5656 | SNORD81        | 1.25 | 14  | 45.3  | 12  | 56.43 |   |
| 5657 | Sox11          | 1.25 | 7   | 0.87  | 6   | 1.08  |   |
| 5658 | Spon1          | 1.25 | 28  | 0.56  | 32  | 0.7   |   |
| 5659 | Ube2c          | 1.25 | 51  | 4.22  | 43  | 5.25  |   |
| 5660 | Wipi1          | 1.25 | 192 | 16.39 | 148 | 20.41 |   |
| 5661 | Zfp770         | 1.25 | 14  | 1.45  | 12  | 1.8   |   |
| 5662 | Ankrd53        | 1.25 | 31  | 0.91  | 32  | 1.13  |   |
| 5663 | Ccdc181        | 1.25 | 17  | 1.83  | 16  | 2.28  |   |
| 5664 | Glcci1         | 1.25 | 165 | 5.35  | 140 | 6.66  |   |
| 5665 | Ranbp6         | 1.25 | 77  | 5.78  | 65  | 7.2   |   |

Supplemental Table 2  
Vehicle versus FSH, 24 hours

|      | A              | B    | C    | D      | E    | F     | G |
|------|----------------|------|------|--------|------|-------|---|
| 5666 | Slc25a40       | 1.25 | 33   | 1.04   | 33   | 1.29  |   |
| 5667 | Smad5          | 1.25 | 212  | 18.94  | 172  | 23.59 |   |
| 5668 | Spon2_1        | 1.25 | 7    | 0.93   | 4    | 1.15  |   |
| 5669 | Vps8           | 1.25 | 187  | 8.02   | 141  | 9.99  |   |
| 5670 | Zfp51          | 1.25 | 22   | 2.08   | 21   | 2.59  |   |
| 5671 | Ube4a          | 1.24 | 447  | 14.97  | 368  | 18.63 |   |
| 5672 | Serf2          | 1.24 | 270  | 388.26 | 326  | 483.2 |   |
| 5673 | Usp28          | 1.24 | 303  | 11.35  | 250  | 14.13 |   |
| 5674 | Trmt1          | 1.24 | 228  | 22.52  | 188  | 28.03 |   |
| 5675 | Ctdp1          | 1.24 | 222  | 10.99  | 224  | 13.68 |   |
| 5676 | Dhx57          | 1.24 | 210  | 7.93   | 179  | 9.86  |   |
| 5677 | Pcmdt1         | 1.24 | 207  | 8.04   | 184  | 10    |   |
| 5678 | Asb8           | 1.24 | 141  | 12.31  | 127  | 15.31 |   |
| 5679 | Slc39a14       | 1.24 | 124  | 5.12   | 101  | 6.36  |   |
| 5680 | Rab3d          | 1.24 | 99   | 6.41   | 83   | 7.97  |   |
| 5681 | Nudt21         | 1.24 | 225  | 28.97  | 199  | 36.02 |   |
| 5682 | Bhlhb9         | 1.24 | 83   | 7.66   | 69   | 9.52  |   |
| 5683 | Spg11          | 1.24 | 263  | 5.08   | 206  | 6.31  |   |
| 5684 | Crot           | 1.24 | 99   | 6.9    | 94   | 8.57  |   |
| 5685 | Dcaf10         | 1.24 | 136  | 3.74   | 123  | 4.65  |   |
| 5686 | Smap1          | 1.24 | 274  | 25.27  | 232  | 31.4  |   |
| 5687 | C2cd2l         | 1.24 | 72   | 3.8    | 64   | 4.72  |   |
| 5688 | Scfd1          | 1.24 | 200  | 13.58  | 162  | 16.87 |   |
| 5689 | Eif4b          | 1.24 | 872  | 48.26  | 732  | 59.94 |   |
| 5690 | Slc25a22       | 1.24 | 5    | 16.27  | 5    | 20.2  |   |
| 5691 | Gorab          | 1.24 | 61   | 4.49   | 56   | 5.57  |   |
| 5692 | Etv6           | 1.24 | 362  | 16.91  | 343  | 20.99 |   |
| 5693 | LOC301124      | 1.24 | 172  | 29.38  | 146  | 36.46 |   |
| 5694 | AABR07034532.1 | 1.24 | 0    | 2.8    | 0    | 3.47  |   |
| 5695 | Adprm          | 1.24 | 53   | 7.66   | 43   | 9.51  |   |
| 5696 | Phf10          | 1.24 | 253  | 24.86  | 235  | 30.83 |   |
| 5697 | Secisbp2       | 1.24 | 151  | 9.46   | 137  | 11.73 |   |
| 5698 | Sharpin        | 1.24 | 89   | 12.46  | 76   | 15.45 |   |
| 5699 | Tchp           | 1.24 | 47   | 3.67   | 44   | 4.55  |   |
| 5700 | AABR07063425.3 | 1.24 | 11   | 18.58  | 21   | 23.03 |   |
| 5701 | Plekhm3        | 1.24 | 77   | 2.97   | 100  | 3.68  |   |
| 5702 | Papolg         | 1.24 | 78   | 4.08   | 66   | 5.05  |   |
| 5703 | Frmtd8         | 1.24 | 164  | 12.88  | 141  | 15.95 |   |
| 5704 | Prkdc          | 1.24 | 177  | 2.91   | 174  | 3.6   |   |
| 5705 | Rit1           | 1.24 | 164  | 20.47  | 117  | 25.35 |   |
| 5706 | LOC100909476   | 1.24 | 244  | 25.71  | 181  | 31.84 |   |
| 5707 | Ppip5k2        | 1.24 | 180  | 5.82   | 164  | 7.21  |   |
| 5708 | Usp54          | 1.24 | 236  | 6.2    | 204  | 7.67  |   |
| 5709 | Ube2h          | 1.24 | 1529 | 67.64  | 1298 | 83.73 |   |
| 5710 | Zfp846         | 1.24 | 33   | 4.09   | 39   | 5.07  |   |
| 5711 | Pstk           | 1.24 | 82   | 4.44   | 80   | 5.49  |   |
| 5712 | Pip4k2a        | 1.24 | 197  | 14.01  | 169  | 17.34 |   |
| 5713 | RGD1305350     | 1.24 | 295  | 25.86  | 250  | 32    |   |
| 5714 | Stag2          | 1.24 | 335  | 12.11  | 293  | 14.99 |   |
| 5715 | Zeb1           | 1.24 | 97   | 5.42   | 96   | 6.71  |   |
| 5716 | Shisa5         | 1.24 | 214  | 24.31  | 180  | 30.07 |   |
| 5717 | Ip6k2          | 1.24 | 342  | 16.14  | 344  | 19.96 |   |
| 5718 | Pdlim2         | 1.24 | 48   | 7.66   | 43   | 9.48  |   |
| 5719 | Plcl2          | 1.24 | 142  | 5.95   | 136  | 7.35  |   |

Supplemental Table 2  
Vehicle versus FSH, 24 hours

|      | A              | B    | C    | D      | E    | F      | G |
|------|----------------|------|------|--------|------|--------|---|
| 5720 | Slc25a38       | 1.24 | 68   | 6.06   | 52   | 7.49   |   |
| 5721 | Eif3l          | 1.24 | 131  | 24.62  | 113  | 30.45  |   |
| 5722 | LOC100910046   | 1.24 | 66   | 3.9    | 57   | 4.82   |   |
| 5723 | Rbmx           | 1.24 | 140  | 16     | 121  | 19.77  |   |
| 5724 | Zfp513         | 1.24 | 151  | 16.88  | 128  | 20.86  |   |
| 5725 | Fam175a        | 1.24 | 50   | 3.45   | 45   | 4.26   |   |
| 5726 | Mrps6          | 1.24 | 522  | 21.39  | 353  | 26.42  |   |
| 5727 | Zfp839         | 1.24 | 33   | 1.81   | 32   | 2.24   |   |
| 5728 | Faf2           | 1.23 | 302  | 14.62  | 257  | 18.05  |   |
| 5729 | Plekha5        | 1.23 | 237  | 6.62   | 187  | 8.17   |   |
| 5730 | Zfp496         | 1.23 | 281  | 16.72  | 221  | 20.64  |   |
| 5731 | Calr           | 1.23 | 2918 | 391.72 | 2479 | 483.6  |   |
| 5732 | Capn15         | 1.23 | 99   | 3.49   | 76   | 4.31   |   |
| 5733 | Edc3           | 1.23 | 114  | 9.6    | 90   | 11.85  |   |
| 5734 | Rab3gap1       | 1.23 | 195  | 15.58  | 153  | 19.23  |   |
| 5735 | Rmnd1          | 1.23 | 114  | 6.62   | 102  | 8.17   |   |
| 5736 | Fat1           | 1.23 | 6182 | 100.48 | 5218 | 123.96 |   |
| 5737 | Bccip          | 1.23 | 66   | 8.83   | 53   | 10.88  |   |
| 5738 | Dxo            | 1.23 | 41   | 6.03   | 35   | 7.44   |   |
| 5739 | Herpud2        | 1.23 | 184  | 13.56  | 123  | 16.71  |   |
| 5740 | Gnb2           | 1.23 | 1093 | 160.64 | 915  | 197.98 |   |
| 5741 | Scamp1         | 1.23 | 232  | 10.91  | 207  | 13.44  |   |
| 5742 | Itpa           | 1.23 | 144  | 26.17  | 113  | 32.25  |   |
| 5743 | Grsf1          | 1.23 | 238  | 18.2   | 209  | 22.42  |   |
| 5744 | Fam50a_2       | 1.23 | 0    | 8.66   | 0    | 10.67  |   |
| 5745 | Lsm1           | 1.23 | 57   | 9.43   | 53   | 11.61  |   |
| 5746 | Rfng           | 1.23 | 64   | 6.94   | 53   | 8.55   |   |
| 5747 | Rpia           | 1.23 | 59   | 6.33   | 43   | 7.79   |   |
| 5748 | Tbc1d22a       | 1.23 | 70   | 10.27  | 54   | 12.65  |   |
| 5749 | Xbp1           | 1.23 | 358  | 64.52  | 285  | 79.49  |   |
| 5750 | Nsmf           | 1.23 | 78   | 5.07   | 63   | 6.24   |   |
| 5751 | Tk2            | 1.23 | 74   | 6.15   | 63   | 7.58   |   |
| 5752 | Atp5o          | 1.23 | 331  | 93.25  | 280  | 114.82 |   |
| 5753 | Pspc1          | 1.23 | 273  | 10.04  | 260  | 12.36  |   |
| 5754 | Usp37          | 1.23 | 181  | 5.12   | 164  | 6.3    |   |
| 5755 | Arih2          | 1.23 | 376  | 16.08  | 291  | 19.8   |   |
| 5756 | Higd2a         | 1.23 | 88   | 40.29  | 74   | 49.59  |   |
| 5757 | Rnf181         | 1.23 | 226  | 27.5   | 202  | 33.84  |   |
| 5758 | Wapal          | 1.23 | 343  | 18.98  | 320  | 23.35  |   |
| 5759 | Tmbim4         | 1.23 | 172  | 42.96  | 146  | 52.85  |   |
| 5760 | AABR07019085.1 | 1.23 | 9    | 0.8    | 6    | 0.98   |   |
| 5761 | AC096370.3     | 1.23 | 0    | 1.81   | 0    | 2.23   |   |
| 5762 | Acsf2          | 1.23 | 46   | 3.15   | 38   | 3.88   |   |
| 5763 | Agpat1         | 1.23 | 52   | 28.49  | 98   | 35.02  |   |
| 5764 | Cnm2           | 1.23 | 133  | 6.93   | 102  | 8.52   |   |
| 5765 | E2f7           | 1.23 | 45   | 1.92   | 33   | 2.36   |   |
| 5766 | Fbrsl1         | 1.23 | 88   | 5.27   | 103  | 6.48   |   |
| 5767 | Hacd4          | 1.23 | 33   | 6.25   | 28   | 7.69   |   |
| 5768 | LOC691995      | 1.23 | 13   | 2.2    | 11   | 2.7    |   |
| 5769 | Mcm8           | 1.23 | 22   | 1      | 15   | 1.23   |   |
| 5770 | Mettl17        | 1.23 | 62   | 5.55   | 43   | 6.83   |   |
| 5771 | Rbl1           | 1.23 | 73   | 4.32   | 62   | 5.31   |   |
| 5772 | Tp53i13        | 1.23 | 54   | 9.14   | 55   | 11.23  |   |
| 5773 | Gtf2b          | 1.23 | 97   | 16.29  | 82   | 20.03  |   |

Supplemental Table 2  
Vehicle versus FSH, 24 hours

|      | A          | B    | C    | D      | E    | F      | G |
|------|------------|------|------|--------|------|--------|---|
| 5774 | Ap2a1      | 1.23 | 424  | 29.21  | 373  | 35.91  |   |
| 5775 | Pcsk5      | 1.23 | 963  | 29.29  | 747  | 35.99  |   |
| 5776 | Rbm10      | 1.23 | 263  | 16.79  | 205  | 20.62  |   |
| 5777 | Ctxn1      | 1.23 | 72   | 14.64  | 61   | 17.98  |   |
| 5778 | Rbbp4      | 1.23 | 131  | 53.04  | 117  | 65.13  |   |
| 5779 | Fbxo6      | 1.23 | 144  | 32.47  | 120  | 39.84  |   |
| 5780 | Mfsd10     | 1.23 | 160  | 20.05  | 145  | 24.6   |   |
| 5781 | Oaz2       | 1.23 | 220  | 59.33  | 166  | 72.8   |   |
| 5782 | Dhx37      | 1.23 | 176  | 9.83   | 151  | 12.06  |   |
| 5783 | Mthfd1     | 1.23 | 189  | 14.88  | 172  | 18.25  |   |
| 5784 | Scrib      | 1.23 | 433  | 17.29  | 368  | 21.21  |   |
| 5785 | Hnrnpc     | 1.23 | 33   | 81.17  | 45   | 99.56  |   |
| 5786 | Ensa       | 1.23 | 192  | 14.41  | 162  | 17.67  |   |
| 5787 | Agps       | 1.23 | 130  | 8.24   | 75   | 10.1   |   |
| 5788 | Prr12      | 1.23 | 288  | 10.38  | 237  | 12.73  |   |
| 5789 | Dynll2     | 1.23 | 221  | 22.63  | 186  | 27.74  |   |
| 5790 | Vangl1     | 1.23 | 130  | 5.37   | 114  | 6.58   |   |
| 5791 | Ctcf       | 1.23 | 330  | 17.06  | 291  | 20.9   |   |
| 5792 | Prpf4b     | 1.22 | 410  | 19.65  | 340  | 24.07  |   |
| 5793 | Fip1l1     | 1.22 | 258  | 18.32  | 219  | 22.44  |   |
| 5794 | Spast      | 1.22 | 121  | 4.84   | 118  | 5.92   |   |
| 5795 | Srsf5      | 1.22 | 691  | 93.97  | 650  | 115.06 |   |
| 5796 | Timp2      | 1.22 | 313  | 42.9   | 253  | 52.53  |   |
| 5797 | Golga7     | 1.22 | 225  | 32.83  | 191  | 40.19  |   |
| 5798 | Prpf8      | 1.22 | 2089 | 68.68  | 1726 | 84.05  |   |
| 5799 | Ctsc       | 1.22 | 26   | 2.53   | 22   | 3.09   |   |
| 5800 | Fmc1       | 1.22 | 20   | 3.54   | 18   | 4.34   |   |
| 5801 | Ftsj2      | 1.22 | 25   | 3.08   | 19   | 3.77   |   |
| 5802 | Inpp5e     | 1.22 | 119  | 7.08   | 102  | 8.67   |   |
| 5803 | Taf11      | 1.22 | 59   | 7.97   | 46   | 9.75   |   |
| 5804 | Zfp865_2   | 1.22 | 92   | 7.44   | 79   | 9.11   |   |
| 5805 | Dnal1      | 1.22 | 180  | 3.31   | 151  | 4.06   |   |
| 5806 | Tnip2      | 1.22 | 48   | 2.96   | 37   | 3.63   |   |
| 5807 | Pogz       | 1.22 | 522  | 17.32  | 455  | 21.18  |   |
| 5808 | Rims2      | 1.22 | 178  | 2.43   | 148  | 2.97   |   |
| 5809 | Notch2     | 1.22 | 972  | 27.11  | 802  | 33.15  |   |
| 5810 | Clcn7      | 1.22 | 169  | 11.96  | 134  | 14.62  |   |
| 5811 | Ndc80      | 1.22 | 66   | 3.2    | 49   | 3.91   |   |
| 5812 | RGD1560065 | 1.22 | 69   | 7.31   | 46   | 8.92   |   |
| 5813 | Setd4      | 1.22 | 179  | 11     | 126  | 13.43  |   |
| 5814 | Cers2      | 1.22 | 474  | 41.54  | 387  | 50.71  |   |
| 5815 | Gpc3       | 1.22 | 32   | 3.37   | 32   | 4.11   |   |
| 5816 | Lym4       | 1.22 | 49   | 5.84   | 55   | 7.13   |   |
| 5817 | Toe1       | 1.22 | 57   | 6.28   | 50   | 7.67   |   |
| 5818 | Zdhhc6     | 1.22 | 130  | 14.66  | 115  | 17.89  |   |
| 5819 | Mcrs1      | 1.22 | 252  | 31.36  | 206  | 38.26  |   |
| 5820 | Eif4g2     | 1.22 | 2133 | 239.23 | 2143 | 291.88 |   |
| 5821 | Ccz1b      | 1.22 | 161  | 14.74  | 133  | 17.98  |   |
| 5822 | Brd3       | 1.22 | 282  | 18.63  | 241  | 22.72  |   |
| 5823 | Kif18b     | 1.22 | 62   | 4.05   | 55   | 4.94   |   |
| 5824 | Elp2       | 1.22 | 323  | 22.94  | 269  | 27.97  |   |
| 5825 | Wtap       | 1.22 | 264  | 15.69  | 228  | 19.13  |   |
| 5826 | Clk2       | 1.22 | 375  | 14.99  | 304  | 18.28  |   |
| 5827 | Dgkd       | 1.22 | 151  | 8.2    | 129  | 10     |   |

Supplemental Table 2  
Vehicle versus FSH, 24 hours

|      | A          | B    | C    | D      | E    | F      | G |
|------|------------|------|------|--------|------|--------|---|
| 5828 | Spidr      | 1.22 | 101  | 5.01   | 98   | 6.1    |   |
| 5829 | Zfpm1      | 1.22 | 47   | 2.5    | 49   | 3.05   |   |
| 5830 | Morc2      | 1.22 | 214  | 9.67   | 186  | 11.79  |   |
| 5831 | Gtf2ird1   | 1.22 | 38   | 12.18  | 40   | 14.84  |   |
| 5832 | Cggbp1     | 1.22 | 440  | 24.79  | 367  | 30.21  |   |
| 5833 | Krtcap2    | 1.22 | 121  | 19     | 83   | 23.15  |   |
| 5834 | Ncbp1      | 1.22 | 179  | 17.47  | 148  | 21.28  |   |
| 5835 | Trim27     | 1.22 | 206  | 20.03  | 162  | 24.41  |   |
| 5836 | Strada     | 1.22 | 227  | 16.68  | 203  | 20.32  |   |
| 5837 | Cdc42ep4   | 1.22 | 85   | 6.52   | 72   | 7.93   |   |
| 5838 | Arhgef3    | 1.22 | 91   | 2.16   | 80   | 2.62   |   |
| 5839 | Dtx2       | 1.22 | 114  | 6.92   | 89   | 8.42   |   |
| 5840 | Tbc1d22b   | 1.22 | 101  | 6.35   | 71   | 7.73   |   |
| 5841 | Efcab14    | 1.22 | 266  | 10.01  | 211  | 12.19  |   |
| 5842 | Tle4       | 1.22 | 252  | 6.59   | 211  | 8.02   |   |
| 5843 | Pelp1      | 1.22 | 249  | 16.06  | 204  | 19.54  |   |
| 5844 | Rbm5       | 1.22 | 574  | 27.11  | 487  | 32.99  |   |
| 5845 | Stk4       | 1.22 | 341  | 13.44  | 290  | 16.34  |   |
| 5846 | Otud5      | 1.22 | 351  | 24.58  | 285  | 29.88  |   |
| 5847 | Gin1       | 1.22 | 71   | 3.14   | 59   | 3.82   |   |
| 5848 | Pcnx       | 1.22 | 481  | 13.79  | 418  | 16.77  |   |
| 5849 | Plxnb1     | 1.22 | 190  | 7.26   | 149  | 8.83   |   |
| 5850 | Mt-nd2     | 1.22 | 3813 | 922.56 | 3182 | 1121.4 |   |
| 5851 | Aasdhppt   | 1.22 | 58   | 12.77  | 51   | 15.52  |   |
| 5852 | Rbsn       | 1.22 | 197  | 8.75   | 168  | 10.63  |   |
| 5853 | Ralgds     | 1.21 | 63   | 4.12   | 50   | 5.01   |   |
| 5854 | Tmem55a    | 1.21 | 194  | 14.24  | 154  | 17.3   |   |
| 5855 | Stard7     | 1.21 | 261  | 16.12  | 211  | 19.58  |   |
| 5856 | Wdr61      | 1.21 | 99   | 11.08  | 76   | 13.45  |   |
| 5857 | Setd2      | 1.21 | 516  | 13.26  | 455  | 16.11  |   |
| 5858 | Mark3      | 1.21 | 417  | 18.6   | 356  | 22.58  |   |
| 5859 | Chd8       | 1.21 | 703  | 19.16  | 587  | 23.25  |   |
| 5860 | Hsp90b1    | 1.21 | 2519 | 193.8  | 2088 | 235.15 |   |
| 5861 | Smarca4    | 1.21 | 1150 | 45.82  | 1007 | 55.6   |   |
| 5862 | Snx2       | 1.21 | 143  | 14.09  | 123  | 17.09  |   |
| 5863 | Tet2       | 1.21 | 206  | 5.04   | 186  | 6.11   |   |
| 5864 | Rpl15      | 1.21 | 841  | 147.63 | 678  | 179    |   |
| 5865 | Ptgfrn     | 1.21 | 535  | 22.21  | 438  | 26.91  |   |
| 5866 | AC117142.1 | 1.21 | 0    | 0.81   | 0    | 0.98   |   |
| 5867 | Bbs12      | 1.21 | 12   | 1.19   | 10   | 1.44   |   |
| 5868 | Bcas2      | 1.21 | 58   | 10.91  | 48   | 13.21  |   |
| 5869 | Bola1      | 1.21 | 12   | 4.01   | 10   | 4.85   |   |
| 5870 | Chrnbl     | 1.21 | 8    | 0.66   | 5    | 0.8    |   |
| 5871 | Clcn5      | 1.21 | 50   | 2.54   | 38   | 3.07   |   |
| 5872 | Gins1      | 1.21 | 30   | 2.78   | 26   | 3.36   |   |
| 5873 | Idnk       | 1.21 | 16   | 0.91   | 21   | 1.1    |   |
| 5874 | Ift81      | 1.21 | 75   | 6.63   | 72   | 8.03   |   |
| 5875 | Irf7       | 1.21 | 23   | 2.27   | 20   | 2.75   |   |
| 5876 | Lrrc3      | 1.21 | 6    | 1.57   | 5    | 1.9    |   |
| 5877 | Mfap5      | 1.21 | 21   | 4.12   | 19   | 4.99   |   |
| 5878 | Nxt2       | 1.21 | 7    | 0.61   | 6    | 0.74   |   |
| 5879 | Pcdhgb6    | 1.21 | 34   | 3.71   | 28   | 4.49   |   |
| 5880 | Pcgf1      | 1.21 | 0    | 1.19   | 0    | 1.44   |   |
| 5881 | RGD1565904 | 1.21 | 0    | 3.3    | 0    | 4      |   |

Supplemental Table 2  
Vehicle versus FSH, 24 hours

|      | A              | B    | C    | D      | E   | F      | G |
|------|----------------|------|------|--------|-----|--------|---|
| 5882 | 1700109H08Rik  | 1.21 | 14   | 1.06   | 6   | 1.28   |   |
| 5883 | AABR07043190.1 | 1.21 | 5    | 1.62   | 3   | 1.96   |   |
| 5884 | AC117869.1     | 1.21 | 1    | 3.48   | 3   | 4.22   |   |
| 5885 | AC120727.2     | 1.21 | 0    | 4.93   | 0   | 5.97   |   |
| 5886 | Amer1          | 1.21 | 33   | 2.08   | 28  | 2.52   |   |
| 5887 | As3mt          | 1.21 | 82   | 4.65   | 100 | 5.63   |   |
| 5888 | Baz1b          | 1.21 | 675  | 21.44  | 570 | 25.96  |   |
| 5889 | Ccdc14         | 1.21 | 61   | 1.51   | 44  | 1.83   |   |
| 5890 | Cib1           | 1.21 | 109  | 25.51  | 86  | 30.89  |   |
| 5891 | Clcc1          | 1.21 | 87   | 5.05   | 72  | 6.11   |   |
| 5892 | Eno3           | 1.21 | 7    | 1.05   | 7   | 1.27   |   |
| 5893 | Fbxo4          | 1.21 | 34   | 3      | 24  | 3.63   |   |
| 5894 | Gas8           | 1.21 | 26   | 1.71   | 23  | 2.07   |   |
| 5895 | Kbtbd6_2       | 1.21 | 0    | 0.85   | 0   | 1.03   |   |
| 5896 | LOC100912599   | 1.21 | 0    | 7.02   | 0   | 8.5    |   |
| 5897 | LOC102547932   | 1.21 | 48   | 6.39   | 39  | 7.74   |   |
| 5898 | Lrrc58         | 1.21 | 200  | 29.31  | 157 | 35.5   |   |
| 5899 | 03/09/15       | 1.21 | 31   | 5.64   | 16  | 6.83   |   |
| 5900 | Pdgfra         | 1.21 | 14   | 0.46   | 11  | 0.56   |   |
| 5901 | Ppm1m          | 1.21 | 21   | 1.85   | 18  | 2.24   |   |
| 5902 | Rn60_20_0032.5 | 1.21 | 34   | 0.8    | 38  | 0.97   |   |
| 5903 | snoR38_1       | 1.21 | 6    | 19.67  | 4   | 23.82  |   |
| 5904 | Vamp4          | 1.21 | 84   | 3.2    | 85  | 3.87   |   |
| 5905 | Wfdc2          | 1.21 | 38   | 10.23  | 42  | 12.38  |   |
| 5906 | Raver1         | 1.21 | 422  | 26.83  | 333 | 32.48  |   |
| 5907 | Kdm3b          | 1.21 | 517  | 16.77  | 421 | 20.29  |   |
| 5908 | Pgam1          | 1.21 | 1023 | 150.33 | 832 | 181.87 |   |
| 5909 | Polr2e         | 1.21 | 180  | 38.46  | 144 | 46.51  |   |
| 5910 | Slc4a7         | 1.21 | 194  | 8.56   | 169 | 10.35  |   |
| 5911 | Tmem98         | 1.21 | 279  | 44.93  | 231 | 54.32  |   |
| 5912 | Dnajb12        | 1.21 | 261  | 19.93  | 204 | 24.1   |   |
| 5913 | Jkamp          | 1.21 | 138  | 20.38  | 109 | 24.64  |   |
| 5914 | Usp34          | 1.21 | 653  | 14.5   | 526 | 17.52  |   |
| 5915 | St3gal2        | 1.21 | 694  | 56.55  | 576 | 68.34  |   |
| 5916 | Slc25a44       | 1.21 | 129  | 6.84   | 105 | 8.27   |   |
| 5917 | LOC100361830   | 1.21 | 161  | 18.12  | 123 | 21.9   |   |
| 5918 | Polr2b         | 1.21 | 314  | 18.89  | 252 | 22.82  |   |
| 5919 | Brwd3          | 1.21 | 90   | 3.55   | 76  | 4.29   |   |
| 5920 | Ppm1f          | 1.21 | 177  | 8.2    | 152 | 9.9    |   |
| 5921 | Hmox1          | 1.21 | 82   | 11.3   | 66  | 13.64  |   |
| 5922 | Med12l         | 1.21 | 178  | 3.31   | 170 | 3.99   |   |
| 5923 | Htatsf1        | 1.21 | 150  | 10.71  | 125 | 12.93  |   |
| 5924 | Fam171a1       | 1.21 | 84   | 6.26   | 68  | 7.55   |   |
| 5925 | Ptrh2          | 1.21 | 73   | 5.7    | 63  | 6.88   |   |
| 5926 | Vbp1           | 1.21 | 147  | 27.78  | 135 | 33.54  |   |
| 5927 | Rqcd1          | 1.21 | 217  | 13.62  | 172 | 16.43  |   |
| 5928 | Tpd52          | 1.21 | 133  | 11.32  | 117 | 13.66  |   |
| 5929 | Pex11b         | 1.21 | 64   | 9.39   | 51  | 11.33  |   |
| 5930 | Echdc1         | 1.21 | 68   | 7.09   | 55  | 8.55   |   |
| 5931 | Ctdsp2         | 1.21 | 153  | 50.83  | 136 | 61.31  |   |
| 5932 | Cd48           | 1.21 | 309  | 35.04  | 218 | 42.27  |   |
| 5933 | Arhgap19       | 1.21 | 52   | 2.37   | 42  | 2.86   |   |
| 5934 | Mapk14         | 1.21 | 478  | 19.3   | 383 | 23.26  |   |
| 5935 | Ttc13          | 1.21 | 365  | 20.46  | 288 | 24.66  |   |

Supplemental Table 2  
Vehicle versus FSH, 24 hours

|      | A              | B    | C    | D      | E    | F      | G |
|------|----------------|------|------|--------|------|--------|---|
| 5936 | AABR07010563.1 | 1.21 | 41   | 13.68  | 38   | 16.48  |   |
| 5937 | Rcan3          | 1.21 | 73   | 9.39   | 50   | 11.31  |   |
| 5938 | Zbtb40         | 1.21 | 73   | 2.55   | 52   | 3.07   |   |
| 5939 | Stt3a          | 1.2  | 784  | 21.86  | 642  | 26.34  |   |
| 5940 | Cep68          | 1.2  | 176  | 12.37  | 131  | 14.91  |   |
| 5941 | Trpm7          | 1.2  | 297  | 8.52   | 236  | 10.26  |   |
| 5942 | Gatad2b        | 1.2  | 285  | 16.15  | 269  | 19.45  |   |
| 5943 | Uggt1          | 1.2  | 781  | 20.44  | 655  | 24.62  |   |
| 5944 | Nod1           | 1.2  | 91   | 4.22   | 65   | 5.08   |   |
| 5945 | Dtl            | 1.2  | 40   | 2.72   | 37   | 3.27   |   |
| 5946 | Tmem109        | 1.2  | 180  | 22.28  | 151  | 26.82  |   |
| 5947 | E4f1           | 1.2  | 132  | 9.03   | 101  | 10.87  |   |
| 5948 | Tbcd           | 1.2  | 278  | 12.75  | 243  | 15.35  |   |
| 5949 | Edem2          | 1.2  | 119  | 13.09  | 111  | 15.76  |   |
| 5950 | Pygo2          | 1.2  | 283  | 24.47  | 235  | 29.45  |   |
| 5951 | Kdm8           | 1.2  | 80   | 6.52   | 66   | 7.85   |   |
| 5952 | Tbl1xr1        | 1.2  | 148  | 4.11   | 128  | 4.95   |   |
| 5953 | Ptpre          | 1.2  | 531  | 33.64  | 483  | 40.47  |   |
| 5954 | Ubp1           | 1.2  | 252  | 15.92  | 201  | 19.16  |   |
| 5955 | Ankrd42        | 1.2  | 55   | 2.61   | 45   | 3.14   |   |
| 5956 | Psmg3          | 1.2  | 67   | 18.22  | 55   | 21.92  |   |
| 5957 | Top2a          | 1.2  | 229  | 9.81   | 184  | 11.79  |   |
| 5958 | Mycbp2         | 1.2  | 406  | 9.09   | 337  | 10.93  |   |
| 5959 | Clk3           | 1.2  | 238  | 21.19  | 183  | 25.47  |   |
| 5960 | Mcm10          | 1.2  | 57   | 2.57   | 47   | 3.09   |   |
| 5961 | Jak1           | 1.2  | 1411 | 74.73  | 1157 | 89.78  |   |
| 5962 | Dus3l          | 1.2  | 67   | 9.34   | 64   | 11.22  |   |
| 5963 | Zfp512b        | 1.2  | 405  | 16.15  | 311  | 19.4   |   |
| 5964 | Zxdc           | 1.2  | 145  | 9.51   | 118  | 11.42  |   |
| 5965 | Gtf3c5         | 1.2  | 147  | 10.68  | 114  | 12.83  |   |
| 5966 | Ptp4a1         | 1.2  | 14   | 26.88  | 10   | 32.29  |   |
| 5967 | Cadps2         | 1.2  | 104  | 2.54   | 99   | 3.05   |   |
| 5968 | Mterfd1        | 1.2  | 95   | 3.07   | 68   | 3.69   |   |
| 5969 | Tm4sf1         | 1.2  | 46   | 5.88   | 40   | 7.06   |   |
| 5970 | Zbed5          | 1.2  | 45   | 11.52  | 41   | 13.83  |   |
| 5971 | Slc39a1        | 1.2  | 604  | 60.56  | 484  | 72.68  |   |
| 5972 | Cs             | 1.2  | 624  | 95.47  | 514  | 114.57 |   |
| 5973 | Tyms           | 1.2  | 121  | 17.74  | 101  | 21.28  |   |
| 5974 | Ung            | 1.2  | 78   | 8.38   | 64   | 10.05  |   |
| 5975 | Kif13a         | 1.2  | 616  | 14.4   | 528  | 17.26  |   |
| 5976 | Hes6           | 1.2  | 84   | 14.08  | 70   | 16.88  |   |
| 5977 | Yipf4          | 1.2  | 133  | 16.43  | 105  | 19.69  |   |
| 5978 | Coq6           | 1.2  | 97   | 11.15  | 77   | 13.36  |   |
| 5979 | Mastl          | 1.2  | 132  | 1.83   | 146  | 2.2    |   |
| 5980 | Med26          | 1.2  | 72   | 2.59   | 61   | 3.1    |   |
| 5981 | Uqcc2          | 1.2  | 40   | 19.89  | 30   | 23.85  |   |
| 5982 | Bsg            | 1.2  | 1062 | 153.13 | 869  | 183.54 |   |
| 5983 | Fdft1          | 1.2  | 671  | 45.92  | 580  | 55.03  |   |
| 5984 | Ddx17          | 1.2  | 1718 | 71.94  | 1562 | 86.2   |   |
| 5985 | Ctsa           | 1.2  | 942  | 104.02 | 785  | 124.63 |   |
| 5986 | Ints4          | 1.2  | 165  | 10.29  | 158  | 12.33  |   |
| 5987 | Slc35a4        | 1.2  | 296  | 29.73  | 245  | 35.61  |   |
| 5988 | Sod1           | 1.2  | 607  | 220.3  | 495  | 263.82 |   |
| 5989 | Hdac2          | 1.2  | 381  | 39.01  | 303  | 46.71  |   |

Supplemental Table 2  
Vehicle versus FSH, 24 hours

|      | A              | B    | C    | D      | E    | F      | G |
|------|----------------|------|------|--------|------|--------|---|
| 5990 | Dpf2           | 1.2  | 437  | 38.66  | 343  | 46.28  |   |
| 5991 | Arhgef18       | 1.2  | 274  | 8.53   | 207  | 10.22  |   |
| 5992 | Sidt2          | 1.2  | 538  | 27.12  | 429  | 32.46  |   |
| 5993 | Zfp213         | 1.2  | 34   | 1.76   | 50   | 2.11   |   |
| 5994 | AABR07058466.1 | 1.2  | 11   | 2.5    | 10   | 2.99   |   |
| 5995 | Cmc1           | 1.2  | 26   | 6.27   | 28   | 7.5    |   |
| 5996 | Hexb           | 1.2  | 86   | 7.86   | 92   | 9.4    |   |
| 5997 | LOC688452      | 1.2  | 198  | 3.81   | 107  | 4.56   |   |
| 5998 | Mtif3          | 1.2  | 48   | 5.43   | 45   | 6.5    |   |
| 5999 | Rn60_10_0892.1 | 1.2  | 34   | 3.31   | 27   | 3.96   |   |
| 6000 | Rps6ka1        | 1.2  | 21   | 1.17   | 17   | 1.4    |   |
| 6001 | RT1-CE7        | 1.2  | 9    | 1.73   | 9    | 2.07   |   |
| 6002 | Uck2           | 1.2  | 62   | 5.19   | 35   | 6.21   |   |
| 6003 | Ube2r2         | 1.2  | 438  | 62.94  | 351  | 75.32  |   |
| 6004 | Nrd1           | 1.2  | 453  | 22.39  | 367  | 26.79  |   |
| 6005 | Ar             | 1.2  | 199  | 7.78   | 155  | 9.3    |   |
| 6006 | Slc25a11       | 1.2  | 132  | 26.84  | 110  | 32.1   |   |
| 6007 | Clec2g         | 1.2  | 156  | 17.45  | 134  | 20.86  |   |
| 6008 | Ube2s          | 1.2  | 494  | 135.12 | 405  | 161.51 |   |
| 6009 | Hinfp          | 1.2  | 74   | 8.49   | 59   | 10.15  |   |
| 6010 | Zfp787         | 1.2  | 113  | 8.16   | 74   | 9.75   |   |
| 6011 | Atp5a1         | 1.2  | 1787 | 237.06 | 1454 | 283.32 |   |
| 6012 | Dus1l          | 1.19 | 68   | 4.75   | 57   | 5.68   |   |
| 6013 | Fopnl          | 1.19 | 109  | 15.41  | 83   | 18.41  |   |
| 6014 | Plagl2         | 1.19 | 96   | 4.11   | 75   | 4.91   |   |
| 6015 | Sirt7          | 1.19 | 71   | 6.44   | 56   | 7.7    |   |
| 6016 | Galnt1         | 1.19 | 264  | 31.85  | 226  | 38.05  |   |
| 6017 | Ubr4           | 1.19 | 1779 | 26.61  | 1455 | 31.79  |   |
| 6018 | Abca1          | 1.19 | 494  | 12.99  | 377  | 15.51  |   |
| 6019 | Prkcsb         | 1.19 | 675  | 78.6   | 547  | 93.86  |   |
| 6020 | Arf6           | 1.19 | 286  | 62.13  | 234  | 74.18  |   |
| 6021 | Fbxw11         | 1.19 | 435  | 19.14  | 358  | 22.85  |   |
| 6022 | Lrrc40         | 1.19 | 98   | 6.85   | 82   | 8.18   |   |
| 6023 | Mrpl4          | 1.19 | 122  | 17.77  | 100  | 21.22  |   |
| 6024 | N4bp3_1        | 1.19 | 0    | 2.39   | 0    | 2.86   |   |
| 6025 | Stxbp4         | 1.19 | 95   | 5.69   | 86   | 6.79   |   |
| 6026 | Tbca_1         | 1.19 | 236  | 114.97 | 201  | 137.21 |   |
| 6027 | Hs6st1         | 1.19 | 897  | 47.33  | 736  | 56.49  |   |
| 6028 | Ccng1          | 1.19 | 581  | 44.31  | 474  | 52.87  |   |
| 6029 | Ppm1g          | 1.19 | 280  | 29.65  | 230  | 35.37  |   |
| 6030 | Arf5           | 1.19 | 410  | 94.76  | 335  | 113.04 |   |
| 6031 | Arel1          | 1.19 | 254  | 9.79   | 204  | 11.68  |   |
| 6032 | Samm50         | 1.19 | 174  | 21.52  | 139  | 25.66  |   |
| 6033 | Znrd1          | 1.19 | 55   | 11.53  | 39   | 13.74  |   |
| 6034 | Tmem186        | 1.19 | 41   | 4.76   | 36   | 5.67   |   |
| 6035 | Tiparp         | 1.19 | 241  | 21.8   | 190  | 25.99  |   |
| 6036 | Ergic2         | 1.19 | 164  | 18.51  | 135  | 22.06  |   |
| 6037 | Tfam           | 1.19 | 125  | 14.59  | 86   | 17.39  |   |
| 6038 | Ptprf          | 1.19 | 1026 | 32.76  | 839  | 39.03  |   |
| 6039 | Lrrc49         | 1.19 | 72   | 4.2    | 62   | 5      |   |
| 6040 | Rce1           | 1.19 | 56   | 8.81   | 43   | 10.5   |   |
| 6041 | Mpi            | 1.19 | 82   | 10.03  | 66   | 11.94  |   |
| 6042 | Sec62          | 1.19 | 275  | 28.1   | 218  | 33.46  |   |
| 6043 | Wac            | 1.19 | 342  | 36.31  | 289  | 43.22  |   |



Supplemental Table 2  
Vehicle versus FSH, 24 hours

|      | A              | B    | C   | D      | E   | F      | G |
|------|----------------|------|-----|--------|-----|--------|---|
| 6044 | Tcf12          | 1.19 | 424 | 19.91  | 362 | 23.69  |   |
| 6045 | RGD1309621     | 1.19 | 259 | 12.1   | 213 | 14.39  |   |
| 6046 | Bend7          | 1.19 | 40  | 2.12   | 33  | 2.52   |   |
| 6047 | Dolpp1         | 1.19 | 52  | 4.73   | 40  | 5.62   |   |
| 6048 | Rps6ka6        | 1.19 | 24  | 1.26   | 21  | 1.5    |   |
| 6049 | AABR07006458.1 | 1.19 | 25  | 4.21   | 19  | 5.01   |   |
| 6050 | Chtf18         | 1.19 | 24  | 1.55   | 18  | 1.84   |   |
| 6051 | Ddias          | 1.19 | 24  | 1.65   | 19  | 1.96   |   |
| 6052 | Dgka           | 1.19 | 102 | 5.42   | 78  | 6.44   |   |
| 6053 | LOC100909750   | 1.19 | 11  | 3.19   | 7   | 3.79   |   |
| 6054 | Mien1          | 1.19 | 56  | 21.9   | 45  | 26.03  |   |
| 6055 | Ppp2r5a        | 1.19 | 105 | 9.5    | 90  | 11.3   |   |
| 6056 | Ptch1          | 1.19 | 177 | 4.74   | 139 | 5.64   |   |
| 6057 | Rn60_1_1361.1  | 1.19 | 8   | 0.35   | 9   | 0.41   |   |
| 6058 | Rpl35a_4       | 1.19 | 0   | 8.23   | 0   | 9.79   |   |
| 6059 | Vash1          | 1.19 | 23  | 2.61   | 18  | 3.1    |   |
| 6060 | Vav2           | 1.19 | 82  | 2.65   | 74  | 3.16   |   |
| 6061 | Zfp2           | 1.19 | 22  | 1.32   | 14  | 1.57   |   |
| 6062 | Smad4          | 1.19 | 401 | 40.88  | 318 | 48.58  |   |
| 6063 | Tmem33         | 1.19 | 223 | 8.69   | 164 | 10.33  |   |
| 6064 | Tead2          | 1.19 | 317 | 32.37  | 253 | 38.45  |   |
| 6065 | Zfp574         | 1.19 | 147 | 11.14  | 111 | 13.24  |   |
| 6066 | Epdr1          | 1.19 | 138 | 14.24  | 111 | 16.92  |   |
| 6067 | Leprot1        | 1.19 | 278 | 23.04  | 228 | 27.37  |   |
| 6068 | LOC294154      | 1.19 | 92  | 26.03  | 70  | 30.91  |   |
| 6069 | Cuta           | 1.19 | 127 | 32.51  | 96  | 38.61  |   |
| 6070 | Mphosph8       | 1.19 | 3   | 7.89   | 11  | 9.37   |   |
| 6071 | Tars2          | 1.19 | 114 | 8.67   | 94  | 10.3   |   |
| 6072 | Emc1           | 1.19 | 397 | 15.62  | 331 | 18.55  |   |
| 6073 | Synm           | 1.19 | 235 | 7.51   | 189 | 8.91   |   |
| 6074 | Chtf8          | 1.19 | 550 | 42.39  | 429 | 50.32  |   |
| 6075 | Fry            | 1.19 | 107 | 1.58   | 79  | 1.88   |   |
| 6076 | Fam208a        | 1.19 | 185 | 6.72   | 166 | 7.98   |   |
| 6077 | Prickle2       | 1.19 | 170 | 3.89   | 134 | 4.62   |   |
| 6078 | Slc39a10       | 1.19 | 716 | 34.8   | 588 | 41.29  |   |
| 6079 | Mphosph9       | 1.19 | 73  | 1.78   | 53  | 2.11   |   |
| 6080 | Foxj3          | 1.19 | 233 | 10.13  | 189 | 12.02  |   |
| 6081 | Pdcd7          | 1.19 | 73  | 5.41   | 62  | 6.42   |   |
| 6082 | Pgm1           | 1.19 | 167 | 16.06  | 139 | 19.06  |   |
| 6083 | Slc4a2         | 1.19 | 457 | 27.11  | 381 | 32.16  |   |
| 6084 | Arfgap2        | 1.19 | 421 | 34.4   | 330 | 40.8   |   |
| 6085 | Got2           | 1.19 | 481 | 50.51  | 391 | 59.88  |   |
| 6086 | Rpl39_7        | 1.19 | 16  | 185.65 | 18  | 220.08 |   |
| 6087 | Bloc1s4        | 1.19 | 38  | 7.25   | 31  | 8.59   |   |
| 6088 | Cuedc2         | 1.19 | 58  | 6.26   | 42  | 7.42   |   |
| 6089 | Fahd2a         | 1.18 | 71  | 7.82   | 59  | 9.27   |   |
| 6090 | Ttbk2          | 1.18 | 81  | 3.65   | 80  | 4.32   |   |
| 6091 | Rab11b         | 1.18 | 569 | 68.55  | 441 | 81.2   |   |
| 6092 | Grik5          | 1.18 | 249 | 9.68   | 194 | 11.47  |   |
| 6093 | Ncdn           | 1.18 | 198 | 11.86  | 151 | 14.04  |   |
| 6094 | Arl6           | 1.18 | 44  | 3.63   | 34  | 4.3    |   |
| 6095 | Cgrrf1         | 1.18 | 58  | 5.09   | 51  | 6.02   |   |
| 6096 | Metap1         | 1.18 | 191 | 15.31  | 163 | 18.13  |   |
| 6097 | Phldb3         | 1.18 | 34  | 3.51   | 32  | 4.16   |   |

Supplemental Table 2  
Vehicle versus FSH, 24 hours

|      | A          | B    | C    | D     | E    | F      | G |
|------|------------|------|------|-------|------|--------|---|
| 6098 | Pms1       | 1.18 | 44   | 2.26  | 37   | 2.68   |   |
| 6099 | Vwa9       | 1.18 | 143  | 11.87 | 117  | 14.05  |   |
| 6100 | Nubp2      | 1.18 | 97   | 17.39 | 83   | 20.58  |   |
| 6101 | Ndufa10    | 1.18 | 277  | 29.76 | 216  | 35.22  |   |
| 6102 | Erp44      | 1.18 | 231  | 29.1  | 173  | 34.43  |   |
| 6103 | Tmem18     | 1.18 | 135  | 8.97  | 106  | 10.61  |   |
| 6104 | Ssna1      | 1.18 | 89   | 26.29 | 70   | 31.1   |   |
| 6105 | Rer1       | 1.18 | 223  | 38.32 | 174  | 45.29  |   |
| 6106 | Rhog       | 1.18 | 150  | 14.06 | 119  | 16.62  |   |
| 6107 | Jmy        | 1.18 | 102  | 6.42  | 95   | 7.59   |   |
| 6108 | Eif2b5     | 1.18 | 276  | 20.56 | 215  | 24.3   |   |
| 6109 | Fam193b    | 1.18 | 407  | 11.86 | 273  | 14.01  |   |
| 6110 | Chd3       | 1.18 | 1058 | 36.17 | 854  | 42.72  |   |
| 6111 | Kansl1     | 1.18 | 335  | 18.88 | 274  | 22.29  |   |
| 6112 | Acbd4      | 1.18 | 28   | 2.23  | 29   | 2.64   |   |
| 6113 | Adgrg6     | 1.18 | 23   | 0.58  | 21   | 0.69   |   |
| 6114 | Akap7      | 1.18 | 46   | 3.76  | 38   | 4.44   |   |
| 6115 | Bdh2       | 1.18 | 59   | 6.9   | 45   | 8.14   |   |
| 6116 | Fam53a     | 1.18 | 97   | 3.76  | 78   | 4.44   |   |
| 6117 | Hs1bp3     | 1.18 | 83   | 5.25  | 58   | 6.2    |   |
| 6118 | Mppe1      | 1.18 | 112  | 6.93  | 75   | 8.18   |   |
| 6119 | Nol7       | 1.18 | 78   | 8.19  | 73   | 9.67   |   |
| 6120 | RGD1565033 | 1.18 | 32   | 3.87  | 26   | 4.57   |   |
| 6121 | Wdr25      | 1.18 | 50   | 2.12  | 49   | 2.5    |   |
| 6122 | Zfp853     | 1.18 | 18   | 1.61  | 16   | 1.9    |   |
| 6123 | LOC689757  | 1.18 | 80   | 3.96  | 64   | 4.68   |   |
| 6124 | Arl2bp     | 1.18 | 378  | 43.13 | 311  | 50.9   |   |
| 6125 | Taf1c      | 1.18 | 98   | 6.89  | 76   | 8.12   |   |
| 6126 | Zfp367     | 1.18 | 75   | 3.78  | 51   | 4.46   |   |
| 6127 | Usp3       | 1.18 | 196  | 12.8  | 187  | 15.09  |   |
| 6128 | Slc31a2    | 1.18 | 47   | 5.22  | 41   | 6.15   |   |
| 6129 | Hist1h1c   | 1.18 | 34   | 14.43 | 28   | 17     |   |
| 6130 | Acadvl     | 1.18 | 166  | 17.5  | 140  | 20.61  |   |
| 6131 | Ptcd3      | 1.18 | 211  | 12.74 | 170  | 15.01  |   |
| 6132 | Msto1      | 1.18 | 44   | 7.33  | 33   | 8.63   |   |
| 6133 | Syf2       | 1.18 | 125  | 20.84 | 105  | 24.54  |   |
| 6134 | Fam114a2   | 1.18 | 113  | 13.12 | 96   | 15.45  |   |
| 6135 | Gucy1a3    | 1.18 | 714  | 29.17 | 556  | 34.34  |   |
| 6136 | Ccdc106    | 1.18 | 35   | 5.13  | 33   | 6.03   |   |
| 6137 | Dnajc12    | 1.18 | 21   | 4.19  | 19   | 4.92   |   |
| 6138 | Fbxw9      | 1.18 | 54   | 5.48  | 40   | 6.44   |   |
| 6139 | Rbmx2      | 1.18 | 21   | 3.02  | 16   | 3.55   |   |
| 6140 | RGD1563365 | 1.18 | 45   | 8.8   | 34   | 10.35  |   |
| 6141 | Nol9       | 1.18 | 110  | 9.76  | 79   | 11.48  |   |
| 6142 | Klf3       | 1.18 | 242  | 10.74 | 180  | 12.63  |   |
| 6143 | Srebf1     | 1.18 | 491  | 26.8  | 399  | 31.51  |   |
| 6144 | Lman2      | 1.18 | 482  | 57.98 | 372  | 68.18  |   |
| 6145 | N4bp2l2    | 1.18 | 152  | 16.46 | 126  | 19.35  |   |
| 6146 | LOC361646  | 1.18 | 167  | 3.94  | 126  | 4.63   |   |
| 6147 | Osbpl2     | 1.18 | 147  | 10.09 | 114  | 11.86  |   |
| 6148 | Marcks     | 1.18 | 715  | 42.44 | 575  | 49.89  |   |
| 6149 | Hnrnp1l    | 1.18 | 322  | 31.57 | 256  | 37.1   |   |
| 6150 | Nisch      | 1.18 | 2134 | 87.81 | 1644 | 103.18 |   |
| 6151 | Nacc1      | 1.18 | 760  | 41.37 | 582  | 48.61  |   |

Supplemental Table 2  
Vehicle versus FSH, 24 hours

|      | A            | B    | C    | D       | E    | F       | G |
|------|--------------|------|------|---------|------|---------|---|
| 6152 | Aptx         | 1.17 | 82   | 8.29    | 71   | 9.74    |   |
| 6153 | Mrps21       | 1.17 | 73   | 17.93   | 86   | 21.07   |   |
| 6154 | Mrps31       | 1.17 | 77   | 7.5     | 70   | 8.81    |   |
| 6155 | Srp9         | 1.17 | 58   | 8.82    | 50   | 10.36   |   |
| 6156 | Ngfrap1      | 1.17 | 1855 | 577.37  | 1463 | 678.29  |   |
| 6157 | Tsku         | 1.17 | 75   | 7.07    | 63   | 8.3     |   |
| 6158 | Spty2d1      | 1.17 | 182  | 9.54    | 152  | 11.2    |   |
| 6159 | Gbbp1l2      | 1.17 | 15   | 1.95    | 11   | 2.29    |   |
| 6160 | Hdac10       | 1.17 | 38   | 3.04    | 30   | 3.57    |   |
| 6161 | Vps13d       | 1.17 | 573  | 8.32    | 463  | 9.76    |   |
| 6162 | Orc2         | 1.17 | 158  | 6.88    | 119  | 8.07    |   |
| 6163 | Pycl         | 1.17 | 88   | 14.1    | 70   | 16.54   |   |
| 6164 | Ext1         | 1.17 | 1506 | 70.46   | 1144 | 82.65   |   |
| 6165 | Letm1        | 1.17 | 222  | 18.19   | 173  | 21.33   |   |
| 6166 | Hdhd2        | 1.17 | 142  | 5.78    | 146  | 6.78    |   |
| 6167 | Mb21d2       | 1.17 | 149  | 9.11    | 124  | 10.69   |   |
| 6168 | Arhgef2      | 1.17 | 401  | 19.68   | 319  | 23.07   |   |
| 6169 | Atp6v0c      | 1.17 | 749  | 146.77  | 571  | 172.07  |   |
| 6170 | Atp2a2       | 1.17 | 1361 | 48.29   | 1104 | 56.61   |   |
| 6171 | Vta1         | 1.17 | 177  | 27.08   | 139  | 31.75   |   |
| 6172 | Hm13         | 1.17 | 677  | 42.13   | 475  | 49.37   |   |
| 6173 | Arap1        | 1.17 | 252  | 10.66   | 209  | 12.49   |   |
| 6174 | Dcaf13       | 1.17 | 125  | 15.48   | 97   | 18.14   |   |
| 6175 | Irf9         | 1.17 | 37   | 4.83    | 29   | 5.66    |   |
| 6176 | RGD1562747   | 1.17 | 32   | 2.51    | 27   | 2.94    |   |
| 6177 | Trpm4        | 1.17 | 36   | 1.59    | 27   | 1.86    |   |
| 6178 | Agpat9       | 1.17 | 43   | 2.53    | 30   | 2.97    |   |
| 6179 | Kalrn        | 1.17 | 86   | 0.82    | 87   | 0.97    |   |
| 6180 | Sars2        | 1.17 | 33   | 3.17    | 34   | 3.72    |   |
| 6181 | LOC100360645 | 1.17 | 5479 | 1651.93 | 4446 | 1935.57 |   |
| 6182 | Sf3b1        | 1.17 | 1173 | 54.27   | 988  | 63.58   |   |
| 6183 | Pigk         | 1.17 | 321  | 44.46   | 256  | 52.06   |   |
| 6184 | Hnrnpul1     | 1.17 | 980  | 59.26   | 772  | 69.4    |   |
| 6185 | Dlc1         | 1.17 | 126  | 5.64    | 99   | 6.6     |   |
| 6186 | Scmh1        | 1.17 | 158  | 10.09   | 123  | 11.82   |   |
| 6187 | Max          | 1.17 | 163  | 17.41   | 125  | 20.39   |   |
| 6188 | Armcx5       | 1.17 | 36   | 5.26    | 28   | 6.16    |   |
| 6189 | Lamtor2      | 1.17 | 80   | 31.25   | 66   | 36.59   |   |
| 6190 | Sh3pxd2a     | 1.17 | 49   | 2.44    | 54   | 2.85    |   |
| 6191 | Ptges3       | 1.17 | 477  | 67.14   | 360  | 78.57   |   |
| 6192 | Nsrp1        | 1.17 | 106  | 6.08    | 83   | 7.11    |   |
| 6193 | LOC497934    | 1.17 | 37   | 5.51    | 29   | 6.44    |   |
| 6194 | Gas2l3       | 1.17 | 47   | 1.57    | 36   | 1.83    |   |
| 6195 | Rrm1         | 1.17 | 255  | 20.78   | 205  | 24.3    |   |
| 6196 | Rnf38        | 1.17 | 169  | 13.46   | 126  | 15.74   |   |
| 6197 | Ctnnbip1     | 1.17 | 132  | 8.53    | 109  | 9.98    |   |
| 6198 | Slc35c1      | 1.17 | 95   | 6.74    | 74   | 7.89    |   |
| 6199 | Dnajc7       | 1.17 | 351  | 30.12   | 283  | 35.21   |   |
| 6200 | Orc4         | 1.17 | 94   | 6.97    | 86   | 8.14    |   |
| 6201 | Taf6l        | 1.17 | 64   | 5.69    | 55   | 6.65    |   |
| 6202 | Tomm34       | 1.17 | 117  | 12.86   | 75   | 15.03   |   |
| 6203 | Aurka        | 1.17 | 53   | 4.86    | 38   | 5.68    |   |
| 6204 | Ndufa7       | 1.17 | 208  | 96.72   | 168  | 113.05  |   |
| 6205 | Commd8       | 1.17 | 53   | 9.18    | 45   | 10.73   |   |

Supplemental Table 2  
Vehicle versus FSH, 24 hours

|      | A               | B    | C   | D      | E   | F      | G |
|------|-----------------|------|-----|--------|-----|--------|---|
| 6206 | Iah1            | 1.17 | 111 | 27.87  | 91  | 32.55  |   |
| 6207 | Memo1           | 1.17 | 214 | 19.24  | 204 | 22.48  |   |
| 6208 | Rtf1            | 1.17 | 327 | 14.69  | 245 | 17.16  |   |
| 6209 | Plekhm1         | 1.17 | 137 | 4.51   | 101 | 5.27   |   |
| 6210 | Cep250          | 1.17 | 128 | 3.7    | 108 | 4.32   |   |
| 6211 | Zfp263          | 1.17 | 70  | 5.72   | 53  | 6.68   |   |
| 6212 | Asxl1           | 1.17 | 375 | 15.57  | 308 | 18.18  |   |
| 6213 | Zfp148          | 1.17 | 303 | 19.19  | 257 | 22.4   |   |
| 6214 | AABR07061902.1  | 1.17 | 53  | 12.67  | 46  | 14.78  |   |
| 6215 | Klhdc8b         | 1.17 | 71  | 5.94   | 62  | 6.93   |   |
| 6216 | Lrrc1           | 1.17 | 98  | 5.54   | 87  | 6.47   |   |
| 6217 | Prkrir          | 1.17 | 265 | 19.61  | 212 | 22.89  |   |
| 6218 | Tbc1d10b        | 1.17 | 216 | 13.23  | 170 | 15.44  |   |
| 6219 | Thyn1           | 1.17 | 112 | 16.11  | 100 | 18.79  |   |
| 6220 | Phip            | 1.17 | 249 | 10.06  | 206 | 11.73  |   |
| 6221 | Pla2g4b         | 1.17 | 90  | 5.06   | 75  | 5.9    |   |
| 6222 | Stxbp2          | 1.17 | 160 | 16.71  | 145 | 19.49  |   |
| 6223 | Swi5            | 1.17 | 331 | 105.12 | 270 | 122.63 |   |
| 6224 | Papola          | 1.17 | 677 | 27.22  | 501 | 31.75  |   |
| 6225 | Elf2            | 1.17 | 212 | 9.77   | 169 | 11.4   |   |
| 6226 | LOC606294       | 1.17 | 88  | 7.83   | 74  | 9.13   |   |
| 6227 | Pacs1           | 1.17 | 235 | 13.99  | 207 | 16.31  |   |
| 6228 | Fbxo18          | 1.17 | 605 | 34.91  | 485 | 40.7   |   |
| 6229 | Ccdc9           | 1.17 | 149 | 12.17  | 137 | 14.19  |   |
| 6230 | Ncoa5           | 1.17 | 290 | 14.56  | 222 | 16.97  |   |
| 6231 | Gne             | 1.17 | 125 | 8.19   | 95  | 9.54   |   |
| 6232 | Plcg1           | 1.17 | 867 | 40.02  | 693 | 46.63  |   |
| 6233 | Slc30a9         | 1.17 | 296 | 21.71  | 222 | 25.3   |   |
| 6234 | Atr             | 1.17 | 137 | 3.02   | 123 | 3.51   |   |
| 6235 | RGD1311783      | 1.17 | 109 | 12.32  | 96  | 14.35  |   |
| 6236 | Stub1           | 1.17 | 154 | 40.66  | 117 | 47.38  |   |
| 6237 | Clpx            | 1.17 | 133 | 11.57  | 116 | 13.48  |   |
| 6238 | Tnip1           | 1.17 | 239 | 19.31  | 205 | 22.5   |   |
| 6239 | Rell1           | 1.16 | 269 | 16.05  | 204 | 18.69  |   |
| 6240 | Mxra8           | 1.16 | 124 | 12.56  | 97  | 14.63  |   |
| 6241 | LOC619574       | 1.16 | 147 | 14.15  | 113 | 16.48  |   |
| 6242 | Rfx7            | 1.16 | 343 | 8.47   | 284 | 9.87   |   |
| 6243 | Pdcl            | 1.16 | 95  | 12.27  | 76  | 14.29  |   |
| 6244 | Thoc5           | 1.16 | 212 | 19.96  | 167 | 23.24  |   |
| 6245 | Rnpepl1         | 1.16 | 242 | 18.28  | 200 | 21.28  |   |
| 6246 | Zfp260_2        | 1.16 | 158 | 18.11  | 124 | 21.07  |   |
| 6247 | AABR07036452.1  | 1.16 | 5   | 1.24   | 6   | 1.45   |   |
| 6248 | AABR07037536.1  | 1.16 | 3   | 0.39   | 1   | 0.45   |   |
| 6249 | AABR07050438.1  | 1.16 | 134 | 1.54   | 106 | 1.79   |   |
| 6250 | AABR07071661.1  | 1.16 | 9   | 0.4    | 17  | 0.46   |   |
| 6251 | AC117925.6      | 1.16 | 0   | 2.33   | 0   | 2.71   |   |
| 6252 | Adcyap1         | 1.16 | 20  | 1.61   | 15  | 1.88   |   |
| 6253 | Ankrd39         | 1.16 | 11  | 0.46   | 8   | 0.54   |   |
| 6254 | Dnajc24         | 1.16 | 14  | 1.57   | 14  | 1.83   |   |
| 6255 | Endov           | 1.16 | 31  | 2.76   | 26  | 3.21   |   |
| 6256 | ENSRNOG00000053 | 1.16 | 0   | 1.29   | 0   | 1.5    |   |
| 6257 | Exosc6          | 1.16 | 5   | 1.52   | 4   | 1.77   |   |
| 6258 | Gns_1           | 1.16 | 0   | 0.66   | 0   | 0.76   |   |
| 6259 | Ift57           | 1.16 | 58  | 3.91   | 45  | 4.55   |   |

Supplemental Table 2  
Vehicle versus FSH, 24 hours

|      | A              | B    | C    | D     | E   | F      | G |
|------|----------------|------|------|-------|-----|--------|---|
| 6260 | Iqcc           | 1.16 | 13   | 0.99  | 16  | 1.15   |   |
| 6261 | Klhl40         | 1.16 | 14   | 1.1   | 9   | 1.28   |   |
| 6262 | Lhfpl1         | 1.16 | 7    | 0.59  | 4   | 0.68   |   |
| 6263 | LOC100911746   | 1.16 | 1    | 3.89  | 1   | 4.52   |   |
| 6264 | LOC100912262   | 1.16 | 0    | 0.33  | 0   | 0.38   |   |
| 6265 | LOC102548225   | 1.16 | 5    | 0.55  | 5   | 0.64   |   |
| 6266 | LOC297756      | 1.16 | 1    | 1.81  | 0   | 2.1    |   |
| 6267 | LOC681367      | 1.16 | 5    | 3.61  | 4   | 4.2    |   |
| 6268 | Lrrc75b        | 1.16 | 44   | 1.68  | 33  | 1.95   |   |
| 6269 | Mdp1           | 1.16 | 35   | 3.94  | 26  | 4.59   |   |
| 6270 | Mrpl35         | 1.16 | 64   | 9.17  | 49  | 10.66  |   |
| 6271 | Nek11          | 1.16 | 14   | 0.47  | 17  | 0.55   |   |
| 6272 | Pank2          | 1.16 | 125  | 8.06  | 105 | 9.37   |   |
| 6273 | Ppil1          | 1.16 | 67   | 7.5   | 62  | 8.72   |   |
| 6274 | Pycard         | 1.16 | 6    | 1.34  | 4   | 1.56   |   |
| 6275 | Rdh16          | 1.16 | 103  | 0.53  | 70  | 0.62   |   |
| 6276 | Rfx3           | 1.16 | 49   | 1.73  | 68  | 2.01   |   |
| 6277 | RGD1306954     | 1.16 | 54   | 7.23  | 47  | 8.4    |   |
| 6278 | RGD1308923     | 1.16 | 25   | 3.93  | 24  | 4.57   |   |
| 6279 | RGD1311745     | 1.16 | 15   | 3.98  | 12  | 4.62   |   |
| 6280 | RGD1560470     | 1.16 | 5    | 0.43  | 4   | 0.5    |   |
| 6281 | RGD1565862     | 1.16 | 97   | 1.24  | 95  | 1.44   |   |
| 6282 | Rn60_13_0828.1 | 1.16 | 7    | 0.32  | 5   | 0.37   |   |
| 6283 | Slc35d1        | 1.16 | 86   | 4.5   | 67  | 5.23   |   |
| 6284 | Tbx10          | 1.16 | 6    | 1.2   | 8   | 1.4    |   |
| 6285 | Tigd3          | 1.16 | 5    | 0.79  | 4   | 0.91   |   |
| 6286 | Tmem81         | 1.16 | 7    | 0.76  | 7   | 0.89   |   |
| 6287 | Topbp1         | 1.16 | 174  | 7.18  | 126 | 8.35   |   |
| 6288 | Ttc12          | 1.16 | 13   | 1.13  | 12  | 1.31   |   |
| 6289 | Twist1         | 1.16 | 31   | 4.65  | 24  | 5.4    |   |
| 6290 | Vash2          | 1.16 | 52   | 2.32  | 44  | 2.7    |   |
| 6291 | Zbtb8b         | 1.16 | 6    | 0.46  | 6   | 0.54   |   |
| 6292 | Zfp626         | 1.16 | 3    | 1.65  | 4   | 1.92   |   |
| 6293 | Zfp956         | 1.16 | 35   | 3.11  | 32  | 3.62   |   |
| 6294 | 5_8S_rRNA_27   | 1.16 | 0    | 8.14  | 0   | 9.47   |   |
| 6295 | AABR07035802.1 | 1.16 | 5    | 0.58  | 5   | 0.68   |   |
| 6296 | AABR07037058.1 | 1.16 | 7    | 4.15  | 11  | 4.83   |   |
| 6297 | AC114446.1     | 1.16 | 0    | 2.05  | 2   | 2.38   |   |
| 6298 | Ccdc65         | 1.16 | 21   | 1.32  | 11  | 1.53   |   |
| 6299 | Cyp2c13_2      | 1.16 | 6    | 1.45  | 7   | 1.68   |   |
| 6300 | Dr1_2          | 1.16 | 1    | 4.02  | 0   | 4.67   |   |
| 6301 | Fam72a         | 1.16 | 8    | 1.76  | 5   | 2.05   |   |
| 6302 | Fbxo25         | 1.16 | 37   | 3.49  | 26  | 4.06   |   |
| 6303 | Rsph9          | 1.16 | 14   | 1.11  | 10  | 1.29   |   |
| 6304 | St8sia1        | 1.16 | 7    | 0.69  | 8   | 0.8    |   |
| 6305 | Uhrf2          | 1.16 | 321  | 12.54 | 255 | 14.58  |   |
| 6306 | Trappc10       | 1.16 | 395  | 12.04 | 300 | 13.99  |   |
| 6307 | Prdm2          | 1.16 | 431  | 12.54 | 334 | 14.56  |   |
| 6308 | Tmem30a        | 1.16 | 343  | 41.37 | 268 | 48.06  |   |
| 6309 | Mapkapk2       | 1.16 | 789  | 67.77 | 596 | 78.69  |   |
| 6310 | Zfp384         | 1.16 | 291  | 15.18 | 227 | 17.63  |   |
| 6311 | Sipa1l1        | 1.16 | 211  | 7.33  | 177 | 8.51   |   |
| 6312 | Psmd2          | 1.16 | 1215 | 100.9 | 962 | 117.13 |   |
| 6313 | Acvr1          | 1.16 | 184  | 10.91 | 136 | 12.66  |   |

Supplemental Table 2  
Vehicle versus FSH, 24 hours

|      | A            | B    | C    | D     | E    | F     | G |
|------|--------------|------|------|-------|------|-------|---|
| 6314 | Chd4         | 1.16 | 1679 | 60.63 | 1319 | 70.34 |   |
| 6315 | Maf1         | 1.16 | 228  | 33.45 | 184  | 38.79 |   |
| 6316 | Sp1          | 1.16 | 390  | 12.31 | 313  | 14.27 |   |
| 6317 | Chrac1       | 1.16 | 97   | 28.05 | 81   | 32.52 |   |
| 6318 | Dbt          | 1.16 | 102  | 7.04  | 78   | 8.16  |   |
| 6319 | Dnaaf5       | 1.16 | 105  | 6.44  | 87   | 7.46  |   |
| 6320 | Mttr10       | 1.16 | 97   | 4.51  | 89   | 5.22  |   |
| 6321 | Syngap1      | 1.16 | 112  | 4.11  | 102  | 4.76  |   |
| 6322 | Sap130       | 1.16 | 420  | 20.26 | 343  | 23.48 |   |
| 6323 | Ncaph2       | 1.16 | 277  | 26.93 | 219  | 31.22 |   |
| 6324 | Vps11        | 1.16 | 348  | 22.45 | 280  | 26.01 |   |
| 6325 | Gon4l        | 1.16 | 241  | 5.19  | 209  | 6.01  |   |
| 6326 | Ttll4        | 1.16 | 169  | 9.95  | 122  | 11.52 |   |
| 6327 | Xylb         | 1.16 | 93   | 4.71  | 82   | 5.46  |   |
| 6328 | Acy1         | 1.16 | 78   | 10.12 | 57   | 11.72 |   |
| 6329 | Ahcyl2       | 1.16 | 128  | 3.14  | 96   | 3.64  |   |
| 6330 | Pdp1         | 1.16 | 132  | 11.51 | 102  | 13.32 |   |
| 6331 | Llgl1        | 1.16 | 400  | 26.97 | 316  | 31.23 |   |
| 6332 | Atp6v1e1     | 1.16 | 229  | 34.07 | 182  | 39.44 |   |
| 6333 | Hsdl1        | 1.16 | 66   | 7.98  | 51   | 9.24  |   |
| 6334 | Prr14l       | 1.16 | 335  | 6.72  | 261  | 7.77  |   |
| 6335 | Bcap31       | 1.16 | 270  | 46.89 | 203  | 54.27 |   |
| 6336 | Heg1         | 1.16 | 744  | 26.14 | 591  | 30.25 |   |
| 6337 | Ankrd26      | 1.16 | 73   | 1.98  | 63   | 2.29  |   |
| 6338 | Hmbs         | 1.16 | 60   | 8.01  | 50   | 9.27  |   |
| 6339 | Zfp275       | 1.16 | 231  | 8.47  | 169  | 9.8   |   |
| 6340 | Mapk1ip1     | 1.16 | 49   | 8.62  | 39   | 9.97  |   |
| 6341 | Myg1         | 1.16 | 109  | 21.01 | 92   | 24.3  |   |
| 6342 | Rabgef1      | 1.16 | 116  | 8.64  | 95   | 9.99  |   |
| 6343 | Tbpl1        | 1.16 | 92   | 9.74  | 84   | 11.27 |   |
| 6344 | 09/15/15     | 1.16 | 533  | 71.85 | 400  | 83.09 |   |
| 6345 | 03/08/15     | 1.16 | 224  | 10.88 | 193  | 12.58 |   |
| 6346 | Ankzf1       | 1.16 | 177  | 13.27 | 142  | 15.35 |   |
| 6347 | LOC100360635 | 1.16 | 29   | 55.7  | 15   | 64.41 |   |
| 6348 | Pcdhgc3      | 1.16 | 421  | 17.06 | 334  | 19.72 |   |
| 6349 | Grb2_2       | 1.16 | 361  | 43.48 | 273  | 50.26 |   |
| 6350 | Nap1l4       | 1.16 | 408  | 38.71 | 318  | 44.75 |   |
| 6351 | Banp         | 1.16 | 202  | 10.44 | 168  | 12.07 |   |
| 6352 | Ccdc32       | 1.16 | 57   | 4.64  | 46   | 5.37  |   |
| 6353 | Mef2bnb      | 1.16 | 66   | 30.2  | 48   | 34.91 |   |
| 6354 | Ngdn         | 1.16 | 109  | 18.24 | 88   | 21.09 |   |
| 6355 | Zfp709       | 1.16 | 57   | 3.99  | 46   | 4.61  |   |
| 6356 | Crat         | 1.16 | 142  | 13.72 | 103  | 15.86 |   |
| 6357 | Pgls         | 1.16 | 82   | 8.18  | 63   | 9.45  |   |
| 6358 | Sco1         | 1.16 | 43   | 6.16  | 32   | 7.11  |   |
| 6359 | Mtx1         | 1.16 | 165  | 12    | 154  | 13.86 |   |
| 6360 | Zhx2         | 1.16 | 63   | 3.4   | 54   | 3.93  |   |
| 6361 | Gpr173       | 1.16 | 52   | 2.36  | 44   | 2.73  |   |
| 6362 | Cdc5l        | 1.15 | 350  | 29.62 | 287  | 34.21 |   |
| 6363 | Pdk1         | 1.15 | 88   | 11.52 | 77   | 13.3  |   |
| 6364 | Eral1        | 1.15 | 85   | 8.33  | 69   | 9.62  |   |
| 6365 | Mzt2b        | 1.15 | 38   | 6.98  | 32   | 8.05  |   |
| 6366 | Mier3        | 1.15 | 155  | 6.73  | 121  | 7.76  |   |
| 6367 | Ric1         | 1.15 | 246  | 10.78 | 207  | 12.44 |   |

Supplemental Table 2  
Vehicle versus FSH, 24 hours

|      | A         | B    | C    | D      | E    | F      | G |
|------|-----------|------|------|--------|------|--------|---|
| 6368 | Acox1     | 1.15 | 361  | 19.58  | 314  | 22.58  |   |
| 6369 | Yeats2    | 1.15 | 391  | 13.66  | 339  | 15.75  |   |
| 6370 | Secisbp2l | 1.15 | 662  | 23.72  | 543  | 27.36  |   |
| 6371 | Ncln      | 1.15 | 419  | 32.9   | 336  | 37.93  |   |
| 6372 | Mrps16    | 1.15 | 59   | 23.81  | 47   | 27.44  |   |
| 6373 | Npat      | 1.15 | 225  | 7.06   | 179  | 8.14   |   |
| 6374 | Ttc14     | 1.15 | 74   | 4.96   | 67   | 5.72   |   |
| 6375 | Tbc1d9b   | 1.15 | 391  | 14.92  | 304  | 17.19  |   |
| 6376 | Vdac2     | 1.15 | 607  | 78.06  | 481  | 89.94  |   |
| 6377 | Prkra     | 1.15 | 219  | 22.23  | 168  | 25.61  |   |
| 6378 | Ggps1     | 1.15 | 154  | 4.96   | 107  | 5.72   |   |
| 6379 | Herc4     | 1.15 | 208  | 7.21   | 155  | 8.31   |   |
| 6380 | Rbm26     | 1.15 | 487  | 14.73  | 385  | 16.96  |   |
| 6381 | Zdhhc8    | 1.15 | 210  | 14.28  | 163  | 16.45  |   |
| 6382 | Slbp      | 1.15 | 175  | 24.68  | 135  | 28.42  |   |
| 6383 | Nfe2l2    | 1.15 | 542  | 50.01  | 426  | 57.6   |   |
| 6384 | Rpl4      | 1.15 | 1986 | 422.34 | 1561 | 486.33 |   |
| 6385 | Ttc4      | 1.15 | 86   | 4.7    | 76   | 5.41   |   |
| 6386 | Rabgap1   | 1.15 | 576  | 20.07  | 429  | 23.1   |   |
| 6387 | Ppib      | 1.15 | 759  | 186.87 | 597  | 215.02 |   |
| 6388 | Cep112    | 1.15 | 104  | 1.73   | 99   | 1.99   |   |
| 6389 | Ss18l1    | 1.15 | 36   | 4.5    | 34   | 5.18   |   |
| 6390 | Trmt10b   | 1.15 | 46   | 4.6    | 45   | 5.29   |   |
| 6391 | Uba1      | 1.15 | 1287 | 87.99  | 1020 | 101.22 |   |
| 6392 | Adck4     | 1.15 | 92   | 5.71   | 72   | 6.56   |   |
| 6393 | Bnip1     | 1.15 | 39   | 5.41   | 30   | 6.22   |   |
| 6394 | Rpl7a_2   | 1.15 | 0    | 29.97  | 0    | 34.48  |   |
| 6395 | Tbc1d8    | 1.15 | 59   | 1.2    | 48   | 1.38   |   |
| 6396 | Rgs12     | 1.15 | 151  | 4.73   | 129  | 5.44   |   |
| 6397 | Zfyve26   | 1.15 | 231  | 5.4    | 192  | 6.21   |   |
| 6398 | Tmed3     | 1.15 | 186  | 33.49  | 147  | 38.51  |   |
| 6399 | Ppan      | 1.15 | 103  | 13.89  | 83   | 15.97  |   |
| 6400 | Ogdh      | 1.15 | 310  | 39.29  | 276  | 45.17  |   |
| 6401 | Suco      | 1.15 | 234  | 9.72   | 176  | 11.18  |   |
| 6402 | Snx8      | 1.15 | 91   | 6.38   | 77   | 7.33   |   |
| 6403 | Mcm5      | 1.15 | 181  | 13.94  | 143  | 16.03  |   |
| 6404 | Rdx       | 1.15 | 206  | 24.47  | 165  | 28.13  |   |
| 6405 | Dffb      | 1.15 | 65   | 4.3    | 57   | 4.94   |   |
| 6406 | Gpn1      | 1.15 | 178  | 12.88  | 134  | 14.79  |   |
| 6407 | Cpsf3     | 1.15 | 187  | 18.63  | 154  | 21.4   |   |
| 6408 | Cecr5     | 1.15 | 83   | 8.17   | 77   | 9.39   |   |
| 6409 | Srsf3     | 1.15 | 621  | 55.46  | 558  | 63.69  |   |
| 6410 | Mtf2      | 1.15 | 144  | 7.92   | 119  | 9.09   |   |
| 6411 | Rarg      | 1.15 | 100  | 4.88   | 75   | 5.61   |   |
| 6412 | Zfp451    | 1.15 | 306  | 5.13   | 287  | 5.89   |   |
| 6413 | Gigyf2    | 1.15 | 258  | 6.83   | 227  | 7.84   |   |
| 6414 | Scyl2     | 1.15 | 306  | 13.41  | 237  | 15.39  |   |
| 6415 | Gmeb2     | 1.15 | 91   | 4.17   | 69   | 4.79   |   |
| 6416 | Mmachc    | 1.15 | 23   | 2.47   | 19   | 2.83   |   |
| 6417 | Mycbp     | 1.15 | 63   | 9.25   | 50   | 10.61  |   |
| 6418 | Nckipsd   | 1.15 | 66   | 3.86   | 49   | 4.43   |   |
| 6419 | Nudt4     | 1.15 | 188  | 14.56  | 152  | 16.71  |   |
| 6420 | Poc5      | 1.15 | 48   | 2.04   | 41   | 2.35   |   |
| 6421 | Slc9a5    | 1.15 | 27   | 1.14   | 25   | 1.31   |   |

Supplemental Table 2  
Vehicle versus FSH, 24 hours

|      | A            | B    | C    | D      | E   | F      | G |
|------|--------------|------|------|--------|-----|--------|---|
| 6422 | Tubg2        | 1.15 | 17   | 2.93   | 10  | 3.36   |   |
| 6423 | Fancc        | 1.15 | 70   | 1.93   | 54  | 2.21   |   |
| 6424 | Tmco4        | 1.15 | 34   | 1.4    | 32  | 1.6    |   |
| 6425 | Ttll1        | 1.15 | 30   | 2.47   | 26  | 2.84   |   |
| 6426 | Usp35        | 1.15 | 40   | 1.57   | 23  | 1.8    |   |
| 6427 | Suv420h1     | 1.15 | 251  | 7.56   | 215 | 8.67   |   |
| 6428 | LOC100911672 | 1.15 | 111  | 28.07  | 70  | 32.19  |   |
| 6429 | Agpat6       | 1.15 | 332  | 22.97  | 266 | 26.33  |   |
| 6430 | Mgst2        | 1.15 | 119  | 58.4   | 102 | 66.95  |   |
| 6431 | Atrnl1       | 1.15 | 126  | 3.2    | 111 | 3.66   |   |
| 6432 | Vma21        | 1.15 | 33   | 4.31   | 26  | 4.95   |   |
| 6433 | Dgkq         | 1.15 | 156  | 6.76   | 109 | 7.74   |   |
| 6434 | Kif3b        | 1.15 | 132  | 4.97   | 113 | 5.69   |   |
| 6435 | Stard3       | 1.15 | 241  | 18.53  | 175 | 21.23  |   |
| 6436 | Rpl19        | 1.15 | 1021 | 484.86 | 903 | 555.21 |   |
| 6437 | Dnajc25      | 1.14 | 47   | 6.47   | 33  | 7.41   |   |
| 6438 | Gng10        | 1.14 | 243  | 53.69  | 193 | 61.47  |   |
| 6439 | SNORD39      | 1.14 | 0    | 208.16 | 0   | 238.32 |   |
| 6440 | Ppp1r9a      | 1.14 | 189  | 5.2    | 219 | 5.95   |   |
| 6441 | Scaf1        | 1.14 | 518  | 29.75  | 404 | 34.04  |   |
| 6442 | Zfp775       | 1.14 | 96   | 3.03   | 66  | 3.46   |   |
| 6443 | Klhdc10      | 1.14 | 381  | 14.62  | 313 | 16.73  |   |
| 6444 | Slc25a46     | 1.14 | 130  | 7.31   | 95  | 8.35   |   |
| 6445 | Bsdc1        | 1.14 | 342  | 26.13  | 260 | 29.86  |   |
| 6446 | RGD1309362   | 1.14 | 115  | 25.82  | 97  | 29.5   |   |
| 6447 | LOC100911537 | 1.14 | 213  | 6.54   | 165 | 7.47   |   |
| 6448 | Ccny         | 1.14 | 222  | 29.61  | 186 | 33.82  |   |
| 6449 | Ift88        | 1.14 | 90   | 3.36   | 82  | 3.83   |   |
| 6450 | Mlycd        | 1.14 | 126  | 10.18  | 102 | 11.63  |   |
| 6451 | Nus1         | 1.14 | 197  | 12.44  | 151 | 14.21  |   |
| 6452 | Orai3        | 1.14 | 29   | 2.49   | 23  | 2.84   |   |
| 6453 | RGD1307315   | 1.14 | 18   | 1.78   | 13  | 2.03   |   |
| 6454 | RGD1564804   | 1.14 | 18   | 2.78   | 16  | 3.17   |   |
| 6455 | Snta1        | 1.14 | 39   | 3.33   | 33  | 3.8    |   |
| 6456 | Stx1b        | 1.14 | 29   | 1.17   | 24  | 1.33   |   |
| 6457 | Yme1l1       | 1.14 | 0    | 1.62   | 0   | 1.85   |   |
| 6458 | Ehbp1        | 1.14 | 278  | 6.75   | 267 | 7.7    |   |
| 6459 | Il1rap       | 1.14 | 72   | 2.05   | 63  | 2.35   |   |
| 6460 | Jrk          | 1.14 | 42   | 4.39   | 33  | 5.01   |   |
| 6461 | Mdk          | 1.14 | 101  | 33.87  | 81  | 38.67  |   |
| 6462 | Nrp1         | 1.14 | 148  | 6.24   | 119 | 7.13   |   |
| 6463 | Oscp1        | 1.14 | 337  | 2.22   | 334 | 2.54   |   |
| 6464 | Rpp40        | 1.14 | 23   | 2.54   | 17  | 2.9    |   |
| 6465 | Tsc2         | 1.14 | 319  | 11.96  | 248 | 13.65  |   |
| 6466 | Sh2b1        | 1.14 | 210  | 13.21  | 154 | 15.08  |   |
| 6467 | Cops4        | 1.14 | 369  | 41.05  | 291 | 46.83  |   |
| 6468 | Txndc11      | 1.14 | 256  | 13.95  | 180 | 15.91  |   |
| 6469 | Mrpl15       | 1.14 | 80   | 7.25   | 66  | 8.27   |   |
| 6470 | Zfp414       | 1.14 | 59   | 11.35  | 45  | 12.93  |   |
| 6471 | Rnf44        | 1.14 | 370  | 20.61  | 288 | 23.48  |   |
| 6472 | Tm2d2        | 1.14 | 93   | 17.05  | 76  | 19.43  |   |
| 6473 | Zfp386       | 1.14 | 158  | 6.19   | 147 | 7.05   |   |
| 6474 | Trim35       | 1.14 | 1025 | 45.85  | 680 | 52.23  |   |
| 6475 | Bpnt1        | 1.14 | 78   | 9.17   | 70  | 10.45  |   |



Supplemental Table 2  
Vehicle versus FSH, 24 hours

|      | A         | B    | C    | D     | E    | F      | G |
|------|-----------|------|------|-------|------|--------|---|
| 6476 | Napg      | 1.14 | 142  | 7.71  | 115  | 8.78   |   |
| 6477 | Zfand6    | 1.14 | 218  | 17.91 | 178  | 20.4   |   |
| 6478 | Nbn       | 1.14 | 141  | 10.32 | 120  | 11.76  |   |
| 6479 | Vwa8      | 1.14 | 54   | 6.39  | 42   | 7.28   |   |
| 6480 | Ogfr      | 1.14 | 205  | 22.63 | 177  | 25.77  |   |
| 6481 | Ints6     | 1.14 | 192  | 7.38  | 139  | 8.4    |   |
| 6482 | Lrch4     | 1.14 | 146  | 10.91 | 119  | 12.43  |   |
| 6483 | Gtf2e1    | 1.14 | 102  | 8.39  | 77   | 9.56   |   |
| 6484 | Nipsnap3b | 1.14 | 71   | 12.95 | 49   | 14.75  |   |
| 6485 | Tm9sf2    | 1.14 | 518  | 39.46 | 413  | 44.91  |   |
| 6486 | Colgalt1  | 1.14 | 475  | 39.29 | 373  | 44.72  |   |
| 6487 | Rev1      | 1.14 | 219  | 8.38  | 173  | 9.53   |   |
| 6488 | Txndc15   | 1.14 | 163  | 24.9  | 137  | 28.33  |   |
| 6489 | Armc1     | 1.14 | 78   | 13.81 | 64   | 15.7   |   |
| 6490 | Ccdc28a   | 1.14 | 31   | 4.8   | 33   | 5.45   |   |
| 6491 | Proser2   | 1.14 | 32   | 1.25  | 24   | 1.42   |   |
| 6492 | Eme2      | 1.14 | 54   | 10.19 | 44   | 11.59  |   |
| 6493 | Taf15     | 1.14 | 337  | 18.89 | 316  | 21.48  |   |
| 6494 | Zmym6nb   | 1.14 | 23   | 5.55  | 21   | 6.32   |   |
| 6495 | Igf1r     | 1.14 | 2693 | 97.52 | 1964 | 110.89 |   |
| 6496 | Camk1     | 1.14 | 120  | 11.3  | 95   | 12.84  |   |
| 6497 | Prkacb    | 1.14 | 105  | 22.43 | 85   | 25.49  |   |
| 6498 | Fktn      | 1.14 | 273  | 9.99  | 210  | 11.36  |   |
| 6499 | Cebpb     | 1.14 | 55   | 9.82  | 42   | 11.15  |   |
| 6500 | Crtc2     | 1.14 | 194  | 15.85 | 148  | 18.01  |   |
| 6501 | Hpcal1    | 1.14 | 256  | 24.62 | 182  | 27.97  |   |
| 6502 | Lrrc8b    | 1.14 | 143  | 12.96 | 114  | 14.72  |   |
| 6503 | Mesdc2    | 1.14 | 431  | 53.29 | 337  | 60.53  |   |
| 6504 | Mdm4      | 1.14 | 211  | 11.43 | 203  | 12.98  |   |
| 6505 | Wdr3      | 1.14 | 133  | 8.66  | 110  | 9.84   |   |
| 6506 | Cd2bp2    | 1.14 | 247  | 21.08 | 195  | 23.94  |   |
| 6507 | Asmtl     | 1.14 | 44   | 7.42  | 29   | 8.42   |   |
| 6508 | Mrpl45    | 1.14 | 99   | 10.85 | 79   | 12.32  |   |
| 6509 | Ccdc22    | 1.14 | 56   | 6.2   | 44   | 7.04   |   |
| 6510 | Cdc14a    | 1.14 | 95   | 1.78  | 67   | 2.02   |   |
| 6511 | Ralgapb   | 1.14 | 493  | 13.96 | 390  | 15.85  |   |
| 6512 | Josd1     | 1.13 | 179  | 15.57 | 136  | 17.67  |   |
| 6513 | Zfr       | 1.13 | 684  | 27    | 530  | 30.64  |   |
| 6514 | Inpp5f    | 1.13 | 120  | 5.46  | 97   | 6.19   |   |
| 6515 | Erccl     | 1.13 | 101  | 21.21 | 78   | 24.05  |   |
| 6516 | Noc4l     | 1.13 | 96   | 12.91 | 75   | 14.64  |   |
| 6517 | Nradd     | 1.13 | 106  | 20.75 | 85   | 23.51  |   |
| 6518 | Mob4      | 1.13 | 136  | 10.89 | 98   | 12.34  |   |
| 6519 | Tgif2     | 1.13 | 106  | 10.2  | 77   | 11.56  |   |
| 6520 | Lamtor3   | 1.13 | 82   | 13.99 | 66   | 15.85  |   |
| 6521 | Ccdc137   | 1.13 | 71   | 5.54  | 61   | 6.28   |   |
| 6522 | Slc24a5   | 1.13 | 87   | 10.36 | 66   | 11.74  |   |
| 6523 | Tyw1      | 1.13 | 71   | 6.26  | 61   | 7.09   |   |
| 6524 | Ptpn11    | 1.13 | 1062 | 43.24 | 811  | 48.97  |   |
| 6525 | Rptor     | 1.13 | 286  | 7.92  | 246  | 8.97   |   |
| 6526 | Tcf3      | 1.13 | 447  | 30.78 | 323  | 34.85  |   |
| 6527 | Urm1      | 1.13 | 102  | 17.21 | 82   | 19.48  |   |
| 6528 | Zc3hav1   | 1.13 | 478  | 21.09 | 367  | 23.87  |   |
| 6529 | Grwd1     | 1.13 | 103  | 11.76 | 76   | 13.32  |   |

Supplemental Table 2  
Vehicle versus FSH, 24 hours

|      | A              | B    | C   | D     | E   | F     | G |
|------|----------------|------|-----|-------|-----|-------|---|
| 6530 | Ndufa6         | 1.13 | 130 | 54.46 | 108 | 61.63 |   |
| 6531 | Rnf115         | 1.13 | 162 | 15.58 | 138 | 17.63 |   |
| 6532 | Uqcrc1         | 1.13 | 429 | 60.63 | 324 | 68.6  |   |
| 6533 | Pomgnt1        | 1.13 | 446 | 39.32 | 343 | 44.46 |   |
| 6534 | Ccdc136        | 1.13 | 101 | 4.09  | 82  | 4.62  |   |
| 6535 | Dnajc30        | 1.13 | 18  | 4.2   | 14  | 4.75  |   |
| 6536 | LOC100360750   | 1.13 | 0   | 3.44  | 0   | 3.89  |   |
| 6537 | LOC100910792   | 1.13 | 18  | 2     | 17  | 2.25  |   |
| 6538 | Pcdh19         | 1.13 | 34  | 1.55  | 28  | 1.75  |   |
| 6539 | Prkab2         | 1.13 | 94  | 3.15  | 65  | 3.56  |   |
| 6540 | Rn60_13_0829.4 | 1.13 | 10  | 2.27  | 8   | 2.57  |   |
| 6541 | Serpinf1       | 1.13 | 9   | 1.45  | 9   | 1.64  |   |
| 6542 | Snrnp35        | 1.13 | 39  | 6.08  | 37  | 6.87  |   |
| 6543 | Susd1          | 1.13 | 45  | 1.9   | 44  | 2.15  |   |
| 6544 | Tmem107        | 1.13 | 19  | 4.32  | 19  | 4.88  |   |
| 6545 | Tspy15         | 1.13 | 9   | 1.82  | 7   | 2.06  |   |
| 6546 | Txnl4b         | 1.13 | 60  | 7.9   | 43  | 8.92  |   |
| 6547 | Acap2          | 1.13 | 271 | 12.14 | 211 | 13.72 |   |
| 6548 | Carkd          | 1.13 | 99  | 10.22 | 83  | 11.55 |   |
| 6549 | Ciao1          | 1.13 | 58  | 8.22  | 48  | 9.29  |   |
| 6550 | Cish           | 1.13 | 21  | 1.42  | 17  | 1.6   |   |
| 6551 | Dusp23         | 1.13 | 13  | 2.6   | 7   | 2.94  |   |
| 6552 | Fam135a        | 1.13 | 180 | 4.95  | 154 | 5.59  |   |
| 6553 | Hadha          | 1.13 | 585 | 42.6  | 469 | 48.14 |   |
| 6554 | Helq           | 1.13 | 36  | 1.16  | 31  | 1.31  |   |
| 6555 | LOC100360977   | 1.13 | 4   | 11.68 | 3   | 13.2  |   |
| 6556 | Pdpf           | 1.13 | 78  | 27.18 | 56  | 30.72 |   |
| 6557 | Rcc1           | 1.13 | 76  | 5.48  | 52  | 6.19  |   |
| 6558 | Slc25a37       | 1.13 | 44  | 1.42  | 16  | 1.61  |   |
| 6559 | Snrnp40        | 1.13 | 144 | 14.54 | 114 | 16.43 |   |
| 6560 | Stard5         | 1.13 | 30  | 5.6   | 24  | 6.33  |   |
| 6561 | Stat2          | 1.13 | 207 | 12.26 | 166 | 13.86 |   |
| 6562 | Tgm2           | 1.13 | 10  | 0.64  | 7   | 0.72  |   |
| 6563 | Psma3          | 1.13 | 259 | 24.22 | 242 | 27.37 |   |
| 6564 | Zfp638         | 1.13 | 344 | 10.78 | 268 | 12.17 |   |
| 6565 | Ube2k          | 1.13 | 316 | 10.58 | 244 | 11.95 |   |
| 6566 | lpo13          | 1.13 | 186 | 11.58 | 144 | 13.08 |   |
| 6567 | Rbbp6          | 1.13 | 373 | 11.97 | 298 | 13.51 |   |
| 6568 | Atad1          | 1.13 | 250 | 13.37 | 197 | 15.09 |   |
| 6569 | B4gal7         | 1.13 | 105 | 13.51 | 86  | 15.24 |   |
| 6570 | Lap3           | 1.13 | 207 | 21.43 | 161 | 24.18 |   |
| 6571 | Grpel2         | 1.13 | 139 | 6.38  | 98  | 7.2   |   |
| 6572 | Usp7           | 1.13 | 555 | 35.11 | 420 | 39.62 |   |
| 6573 | Kif22          | 1.13 | 79  | 8.04  | 68  | 9.07  |   |
| 6574 | Phlda3         | 1.13 | 76  | 13.31 | 61  | 15.01 |   |
| 6575 | Tnrc6c         | 1.13 | 198 | 6.54  | 153 | 7.37  |   |
| 6576 | Txndc12        | 1.13 | 332 | 35.57 | 212 | 40.12 |   |
| 6577 | Kif20a         | 1.13 | 68  | 5.72  | 50  | 6.45  |   |
| 6578 | Wdhd1          | 1.13 | 93  | 3.96  | 65  | 4.47  |   |
| 6579 | Atxn7l3b       | 1.13 | 448 | 31.97 | 349 | 36.05 |   |
| 6580 | Tmem165        | 1.13 | 174 | 16.65 | 133 | 18.77 |   |
| 6581 | Kptn           | 1.13 | 68  | 7.59  | 54  | 8.56  |   |
| 6582 | B3galnt1       | 1.13 | 69  | 7.65  | 48  | 8.63  |   |
| 6583 | Rfx5           | 1.13 | 163 | 9.31  | 128 | 10.49 |   |

Supplemental Table 2  
Vehicle versus FSH, 24 hours

|      | A              | B    | C    | D      | E    | F      | G |
|------|----------------|------|------|--------|------|--------|---|
| 6584 | Usp20          | 1.13 | 188  | 6.81   | 129  | 7.67   |   |
| 6585 | Ace            | 1.13 | 97   | 3.5    | 71   | 3.94   |   |
| 6586 | Snn            | 1.13 | 128  | 10.29  | 104  | 11.59  |   |
| 6587 | Dock10         | 1.13 | 68   | 1.26   | 71   | 1.42   |   |
| 6588 | LOC691170      | 1.13 | 58   | 4.28   | 38   | 4.82   |   |
| 6589 | Cldn12         | 1.13 | 76   | 5.09   | 57   | 5.72   |   |
| 6590 | Tmem222        | 1.13 | 127  | 12.41  | 81   | 13.97  |   |
| 6591 | Nutf2          | 1.13 | 371  | 44.74  | 276  | 50.36  |   |
| 6592 | Hspa14         | 1.13 | 137  | 14.47  | 105  | 16.29  |   |
| 6593 | Vps54          | 1.13 | 202  | 8.05   | 151  | 9.06   |   |
| 6594 | Alkbh5         | 1.12 | 315  | 14.56  | 250  | 16.38  |   |
| 6595 | Abcf3          | 1.12 | 144  | 12.26  | 110  | 13.79  |   |
| 6596 | Exosc1         | 1.12 | 65   | 13.14  | 49   | 14.78  |   |
| 6597 | Lamtor4        | 1.12 | 11   | 12.77  | 10   | 14.36  |   |
| 6598 | Pop7           | 1.12 | 32   | 9.16   | 24   | 10.31  |   |
| 6599 | Tango6         | 1.12 | 116  | 4.27   | 98   | 4.8    |   |
| 6600 | Phc2           | 1.12 | 457  | 20.74  | 316  | 23.32  |   |
| 6601 | Anks3          | 1.12 | 80   | 4.72   | 86   | 5.3    |   |
| 6602 | Vps13c         | 1.12 | 155  | 3.04   | 134  | 3.42   |   |
| 6603 | Ccnh           | 1.12 | 107  | 9.43   | 103  | 10.6   |   |
| 6604 | Hsd17b7        | 1.12 | 30   | 6.7    | 26   | 7.54   |   |
| 6605 | RGD1563861     | 1.12 | 1348 | 501.91 | 1085 | 564.16 |   |
| 6606 | Zfp219         | 1.12 | 211  | 20.79  | 174  | 23.37  |   |
| 6607 | Atp5l          | 1.12 | 183  | 89.85  | 143  | 100.95 |   |
| 6608 | Ankrd46        | 1.12 | 200  | 21.59  | 155  | 24.26  |   |
| 6609 | Agfg2          | 1.12 | 95   | 5.66   | 74   | 6.35   |   |
| 6610 | Col6a3         | 1.12 | 47   | 1      | 34   | 1.12   |   |
| 6611 | Dnajc15        | 1.12 | 68   | 10.81  | 66   | 12.14  |   |
| 6612 | Grpel1         | 1.12 | 156  | 33.48  | 119  | 37.6   |   |
| 6613 | Papss2         | 1.12 | 65   | 3.03   | 58   | 3.41   |   |
| 6614 | Polr3a         | 1.12 | 175  | 6.57   | 137  | 7.38   |   |
| 6615 | Gins2          | 1.12 | 70   | 3.92   | 55   | 4.4    |   |
| 6616 | Ilf3           | 1.12 | 457  | 23.1   | 357  | 25.93  |   |
| 6617 | Ndufaf7        | 1.12 | 32   | 2.31   | 20   | 2.6    |   |
| 6618 | Aldoa          | 1.12 | 3113 | 489.05 | 2382 | 548.95 |   |
| 6619 | Afg3l2         | 1.12 | 198  | 11.75  | 174  | 13.19  |   |
| 6620 | Zfp277         | 1.12 | 244  | 14.85  | 221  | 16.66  |   |
| 6621 | Luc7l          | 1.12 | 220  | 17.32  | 195  | 19.44  |   |
| 6622 | Gpx7           | 1.12 | 473  | 98.6   | 367  | 110.64 |   |
| 6623 | Tkt            | 1.12 | 944  | 98.49  | 704  | 110.52 |   |
| 6624 | Dgcr8          | 1.12 | 249  | 9.88   | 172  | 11.09  |   |
| 6625 | Dnajc14        | 1.12 | 213  | 15.28  | 161  | 17.14  |   |
| 6626 | Cpd            | 1.12 | 883  | 40.9   | 682  | 45.89  |   |
| 6627 | RGD1560108     | 1.12 | 159  | 8.9    | 122  | 9.99   |   |
| 6628 | Bcl2l1         | 1.12 | 204  | 9.56   | 173  | 10.73  |   |
| 6629 | Eif4a3         | 1.12 | 426  | 65.61  | 325  | 73.62  |   |
| 6630 | Qser1          | 1.12 | 510  | 12.33  | 389  | 13.83  |   |
| 6631 | Tmeff2         | 1.12 | 687  | 16.51  | 407  | 18.51  |   |
| 6632 | Asun           | 1.12 | 168  | 9.48   | 113  | 10.63  |   |
| 6633 | AABR07028995.2 | 1.12 | 0    | 19.82  | 0    | 22.22  |   |
| 6634 | Skp1           | 1.12 | 587  | 90.84  | 443  | 101.83 |   |
| 6635 | Zfand2b        | 1.12 | 37   | 6.76   | 31   | 7.57   |   |
| 6636 | LOC100362640   | 1.12 | 16   | 241.56 | 5    | 270.77 |   |
| 6637 | Suclg1         | 1.12 | 308  | 30.29  | 244  | 33.95  |   |

Supplemental Table 2  
Vehicle versus FSH, 24 hours

|      | A             | B    | C    | D       | E    | F      | G |
|------|---------------|------|------|---------|------|--------|---|
| 6638 | Dpp9          | 1.12 | 376  | 23.79   | 280  | 26.66  |   |
| 6639 | Fam160b1      | 1.12 | 224  | 18.32   | 172  | 20.53  |   |
| 6640 | Kmt2b         | 1.12 | 409  | 11.35   | 309  | 12.72  |   |
| 6641 | Atad5         | 1.12 | 61   | 1.97    | 56   | 2.21   |   |
| 6642 | Impdh2        | 1.12 | 267  | 38.46   | 203  | 43.08  |   |
| 6643 | Tiprl         | 1.12 | 152  | 15.63   | 102  | 17.5   |   |
| 6644 | Adamts7       | 1.12 | 191  | 7.46    | 150  | 8.35   |   |
| 6645 | B3galnt2      | 1.12 | 84   | 3.67    | 75   | 4.11   |   |
| 6646 | Akr1b1        | 1.12 | 4280 | 853.46  | 3236 | 955.5  |   |
| 6647 | Pole3         | 1.12 | 117  | 12.96   | 91   | 14.51  |   |
| 6648 | Dcp2_1        | 1.12 | 13   | 6.46    | 18   | 7.23   |   |
| 6649 | Ahcy          | 1.12 | 261  | 31.66   | 198  | 35.43  |   |
| 6650 | Senp2         | 1.12 | 117  | 10.39   | 79   | 11.63  |   |
| 6651 | Acin1         | 1.12 | 1202 | 41.49   | 1000 | 46.43  |   |
| 6652 | Etnk1         | 1.12 | 428  | 11.56   | 318  | 12.94  |   |
| 6653 | Ppapdc1b      | 1.12 | 138  | 16.81   | 111  | 18.81  |   |
| 6654 | Tspan14       | 1.12 | 176  | 16.92   | 122  | 18.93  |   |
| 6655 | Zfp445        | 1.12 | 189  | 11.8    | 133  | 13.2   |   |
| 6656 | Pip4k2c       | 1.12 | 208  | 14.94   | 149  | 16.71  |   |
| 6657 | Crybg3        | 1.12 | 69   | 2.61    | 50   | 2.92   |   |
| 6658 | Dnajb14       | 1.12 | 181  | 5.15    | 112  | 5.76   |   |
| 6659 | Itgb3bp       | 1.12 | 31   | 2.23    | 42   | 2.49   |   |
| 6660 | Lppr2         | 1.12 | 15   | 1.13    | 10   | 1.26   |   |
| 6661 | Mark2         | 1.12 | 279  | 13.38   | 220  | 14.96  |   |
| 6662 | mrpl9         | 1.12 | 92   | 12.6    | 67   | 14.08  |   |
| 6663 | Pck2          | 1.12 | 92   | 10.09   | 76   | 11.28  |   |
| 6664 | Rab23         | 1.12 | 246  | 10.52   | 165  | 11.76  |   |
| 6665 | Zfp618        | 1.12 | 106  | 4.13    | 89   | 4.62   |   |
| 6666 | Ago3          | 1.12 | 51   | 2.06    | 49   | 2.31   |   |
| 6667 | Gltpd2        | 1.12 | 13   | 1.33    | 10   | 1.48   |   |
| 6668 | Kin           | 1.12 | 49   | 4.42    | 39   | 4.94   |   |
| 6669 | Pex11a        | 1.12 | 39   | 2.8     | 29   | 3.13   |   |
| 6670 | Sssca1        | 1.12 | 52   | 12.29   | 42   | 13.74  |   |
| 6671 | Lrp10         | 1.12 | 522  | 43.74   | 400  | 48.88  |   |
| 6672 | Mttr9         | 1.12 | 250  | 9.8     | 187  | 10.95  |   |
| 6673 | Slc15a4       | 1.12 | 103  | 8.67    | 81   | 9.68   |   |
| 6674 | Sf3b5         | 1.12 | 272  | 95.19   | 209  | 106.28 |   |
| 6675 | Ccnt2         | 1.12 | 318  | 9.7     | 274  | 10.82  |   |
| 6676 | Mcm7          | 1.12 | 228  | 22.07   | 179  | 24.63  |   |
| 6677 | Sephs1        | 1.12 | 265  | 9.83    | 218  | 10.98  |   |
| 6678 | Pias1         | 1.12 | 168  | 12.7    | 123  | 14.17  |   |
| 6679 | Tmem208       | 1.12 | 60   | 17.49   | 50   | 19.51  |   |
| 6680 | Aamp          | 1.12 | 370  | 32.3    | 280  | 36.03  |   |
| 6681 | Cog7          | 1.12 | 128  | 8.76    | 90   | 9.77   |   |
| 6682 | Mt-nd4        | 1.12 | 6541 | 1190.86 | 4996 | 1328.2 |   |
| 6683 | LOC100363472  | 1.12 | 50   | 6.09    | 40   | 6.8    |   |
| 6684 | Ankrd52       | 1.12 | 802  | 25.52   | 616  | 28.46  |   |
| 6685 | Slc25a39      | 1.12 | 286  | 49.66   | 218  | 55.38  |   |
| 6686 | Asah1         | 1.11 | 471  | 40.21   | 366  | 44.82  |   |
| 6687 | Rn60_X_0746.3 | 1.11 | 73   | 25.09   | 56   | 27.97  |   |
| 6688 | LOC100361087  | 1.11 | 86   | 3.13    | 66   | 3.49   |   |
| 6689 | Gfod2         | 1.11 | 64   | 3.66    | 55   | 4.08   |   |
| 6690 | Gm17296       | 1.11 | 73   | 1.58    | 59   | 1.76   |   |
| 6691 | Lrsam1        | 1.11 | 50   | 3.42    | 37   | 3.81   |   |

Supplemental Table 2  
Vehicle versus FSH, 24 hours

|      | A              | B    | C   | D      | E   | F      | G |
|------|----------------|------|-----|--------|-----|--------|---|
| 6692 | Lsg1           | 1.11 | 123 | 8.49   | 124 | 9.46   |   |
| 6693 | Ndufaf5        | 1.11 | 69  | 6.53   | 36  | 7.28   |   |
| 6694 | Zfp865_1       | 1.11 | 28  | 3.16   | 21  | 3.52   |   |
| 6695 | Cbx4           | 1.11 | 88  | 13.27  | 68  | 14.77  |   |
| 6696 | Nnt            | 1.11 | 599 | 34.64  | 485 | 38.56  |   |
| 6697 | Strn4          | 1.11 | 383 | 19.56  | 320 | 21.77  |   |
| 6698 | Setd1a         | 1.11 | 463 | 18.07  | 347 | 20.11  |   |
| 6699 | Hk1            | 1.11 | 329 | 24.99  | 241 | 27.81  |   |
| 6700 | Pgrmc1         | 1.11 | 316 | 47.14  | 216 | 52.45  |   |
| 6701 | Arvcf          | 1.11 | 77  | 4.24   | 54  | 4.72   |   |
| 6702 | Tmem147        | 1.11 | 71  | 18.31  | 62  | 20.37  |   |
| 6703 | Tomm7          | 1.11 | 62  | 42.41  | 49  | 47.18  |   |
| 6704 | Bbx            | 1.11 | 182 | 10.24  | 151 | 11.38  |   |
| 6705 | Trak2          | 1.11 | 376 | 11.6   | 267 | 12.89  |   |
| 6706 | Atat1          | 1.11 | 219 | 8.95   | 172 | 9.95   |   |
| 6707 | Npc2           | 1.11 | 660 | 108.91 | 507 | 121.07 |   |
| 6708 | Khsrp          | 1.11 | 419 | 29.35  | 312 | 32.62  |   |
| 6709 | Ankrd13d       | 1.11 | 21  | 1.74   | 20  | 1.93   |   |
| 6710 | Coa4           | 1.11 | 17  | 3.11   | 13  | 3.45   |   |
| 6711 | Glod4          | 1.11 | 121 | 17.44  | 102 | 19.38  |   |
| 6712 | Mrpl39         | 1.11 | 55  | 8.38   | 43  | 9.31   |   |
| 6713 | Nt5e           | 1.11 | 67  | 1.35   | 78  | 1.5    |   |
| 6714 | Pcbd2          | 1.11 | 25  | 11.03  | 26  | 12.26  |   |
| 6715 | Rn60_6_1241.2  | 1.11 | 56  | 1.8    | 41  | 2      |   |
| 6716 | ST7            | 1.11 | 89  | 5.14   | 68  | 5.72   |   |
| 6717 | Zfp560         | 1.11 | 17  | 1.32   | 14  | 1.47   |   |
| 6718 | Comm2          | 1.11 | 71  | 7.11   | 52  | 7.9    |   |
| 6719 | Med31          | 1.11 | 25  | 4.14   | 23  | 4.61   |   |
| 6720 | Tbrg1          | 1.11 | 72  | 62.08  | 38  | 68.99  |   |
| 6721 | Tm9sf3         | 1.11 | 524 | 57.38  | 395 | 63.76  |   |
| 6722 | Uqcc3          | 1.11 | 35  | 12.28  | 31  | 13.64  |   |
| 6723 | Slfn13         | 1.11 | 346 | 15.67  | 294 | 17.41  |   |
| 6724 | Erlin1         | 1.11 | 218 | 16.88  | 166 | 18.75  |   |
| 6725 | AABR07029710.1 | 1.11 | 0   | 9.56   | 2   | 10.62  |   |
| 6726 | Mmp14          | 1.11 | 623 | 62.37  | 476 | 69.23  |   |
| 6727 | Nt5c2          | 1.11 | 181 | 18     | 135 | 19.98  |   |
| 6728 | Phf14          | 1.11 | 263 | 8.65   | 234 | 9.6    |   |
| 6729 | Rpap2          | 1.11 | 92  | 4.21   | 70  | 4.67   |   |
| 6730 | Rundc1         | 1.11 | 68  | 7.42   | 54  | 8.23   |   |
| 6731 | Ctbp1          | 1.11 | 840 | 88.33  | 637 | 97.98  |   |
| 6732 | Msh6           | 1.11 | 249 | 12.71  | 181 | 14.1   |   |
| 6733 | Alkbh1         | 1.11 | 157 | 7.94   | 126 | 8.81   |   |
| 6734 | Dusp18         | 1.11 | 171 | 9.14   | 140 | 10.14  |   |
| 6735 | Tcaf1          | 1.11 | 176 | 11.05  | 132 | 12.26  |   |
| 6736 | Mcts1          | 1.11 | 69  | 6.62   | 70  | 7.34   |   |
| 6737 | Slc25a17       | 1.11 | 134 | 10.82  | 144 | 12     |   |
| 6738 | Vrk1           | 1.11 | 85  | 5.04   | 70  | 5.59   |   |
| 6739 | Adnp2          | 1.11 | 191 | 10.74  | 154 | 11.91  |   |
| 6740 | Brk1           | 1.11 | 230 | 35.27  | 164 | 39.1   |   |
| 6741 | Katnb1         | 1.11 | 73  | 5.94   | 52  | 6.59   |   |
| 6742 | Hadhb          | 1.11 | 255 | 30.2   | 189 | 33.47  |   |
| 6743 | Ndufs2         | 1.11 | 403 | 58.76  | 303 | 65.11  |   |
| 6744 | Araf           | 1.11 | 264 | 21.57  | 189 | 23.9   |   |
| 6745 | Hmgxb4         | 1.11 | 158 | 7.45   | 140 | 8.26   |   |

Supplemental Table 2  
Vehicle versus FSH, 24 hours

|      | A        | B    | C    | D      | E    | F      | G |
|------|----------|------|------|--------|------|--------|---|
| 6746 | Tnks     | 1.11 | 473  | 15.58  | 338  | 17.25  |   |
| 6747 | Ikbpap   | 1.11 | 259  | 13.33  | 207  | 14.76  |   |
| 6748 | Mkrn3    | 1.11 | 21   | 3.3    | 16   | 3.65   |   |
| 6749 | Zmym4    | 1.11 | 324  | 8.63   | 261  | 9.56   |   |
| 6750 | Fkbp14   | 1.11 | 78   | 7.79   | 51   | 8.63   |   |
| 6751 | Ints2    | 1.11 | 126  | 4.65   | 94   | 5.15   |   |
| 6752 | Kifap3   | 1.11 | 213  | 10.02  | 160  | 11.09  |   |
| 6753 | Pmf1     | 1.11 | 42   | 8.59   | 42   | 9.51   |   |
| 6754 | Ppp1r7   | 1.11 | 136  | 16.98  | 101  | 18.8   |   |
| 6755 | Psrc1    | 1.11 | 45   | 5.72   | 34   | 6.33   |   |
| 6756 | Rbpj_1   | 1.11 | 12   | 3.56   | 8    | 3.94   |   |
| 6757 | rnf141   | 1.11 | 63   | 10.73  | 61   | 11.88  |   |
| 6758 | Nup93    | 1.11 | 209  | 15.93  | 178  | 17.63  |   |
| 6759 | Nup133   | 1.11 | 164  | 8.94   | 121  | 9.89   |   |
| 6760 | Carhsp1  | 1.11 | 499  | 39.35  | 371  | 43.54  |   |
| 6761 | Prkab1   | 1.11 | 137  | 13.22  | 109  | 14.62  |   |
| 6762 | Itgb1bp1 | 1.11 | 146  | 16.84  | 100  | 18.63  |   |
| 6763 | Ormdl2   | 1.11 | 93   | 20.72  | 75   | 22.93  |   |
| 6764 | Spsb3    | 1.11 | 169  | 9.95   | 112  | 11.01  |   |
| 6765 | Top2b    | 1.11 | 494  | 18.54  | 393  | 20.52  |   |
| 6766 | Ndufs1   | 1.11 | 222  | 20.24  | 201  | 22.39  |   |
| 6767 | Lrrk1    | 1.11 | 100  | 2.14   | 73   | 2.37   |   |
| 6768 | Mfap3    | 1.11 | 147  | 17.55  | 112  | 19.41  |   |
| 6769 | Sepsecs  | 1.11 | 67   | 3.2    | 48   | 3.53   |   |
| 6770 | Cwc15    | 1.11 | 67   | 13.12  | 56   | 14.5   |   |
| 6771 | Sdc4     | 1.11 | 298  | 28.44  | 219  | 31.43  |   |
| 6772 | Cdc26    | 1.11 | 81   | 11.22  | 74   | 12.4   |   |
| 6773 | Nfya     | 1.11 | 290  | 18.71  | 230  | 20.67  |   |
| 6774 | Cad      | 1.1  | 345  | 12.62  | 267  | 13.94  |   |
| 6775 | Ptms     | 1.1  | 474  | 107.04 | 351  | 118.25 |   |
| 6776 | Bcar3    | 1.1  | 763  | 36.74  | 581  | 40.58  |   |
| 6777 | Fundc2   | 1.1  | 107  | 17.84  | 95   | 19.7   |   |
| 6778 | Atp6v1h  | 1.1  | 179  | 18.01  | 137  | 19.89  |   |
| 6779 | Btbd8_1  | 1.1  | 8    | 1.52   | 8    | 1.68   |   |
| 6780 | Hmgb2    | 1.1  | 14   | 10.81  | 18   | 11.94  |   |
| 6781 | Hsd17b8  | 1.1  | 26   | 4.07   | 22   | 4.49   |   |
| 6782 | Ing3     | 1.1  | 61   | 5.78   | 46   | 6.38   |   |
| 6783 | Trmt61a  | 1.1  | 135  | 4.83   | 116  | 5.33   |   |
| 6784 | Ufsp2    | 1.1  | 95   | 12.17  | 85   | 13.44  |   |
| 6785 | Zbtb17   | 1.1  | 161  | 11.25  | 124  | 12.42  |   |
| 6786 | Flrt3    | 1.1  | 1633 | 87.92  | 1257 | 97.08  |   |
| 6787 | Ranbp3   | 1.1  | 250  | 26.64  | 199  | 29.42  |   |
| 6788 | Asnsd1   | 1.1  | 131  | 15.07  | 98   | 16.64  |   |
| 6789 | Atg5     | 1.1  | 113  | 10.16  | 115  | 11.21  |   |
| 6790 | Traf6    | 1.1  | 102  | 7.27   | 71   | 8.03   |   |
| 6791 | Gsk3b    | 1.1  | 331  | 25.91  | 222  | 28.59  |   |
| 6792 | Rai1     | 1.1  | 448  | 11.32  | 382  | 12.49  |   |
| 6793 | Sec23b   | 1.1  | 304  | 24.03  | 237  | 26.52  |   |
| 6794 | Sumo2    | 1.1  | 144  | 116.28 | 111  | 128.31 |   |
| 6795 | Tgds     | 1.1  | 93   | 6.91   | 83   | 7.62   |   |
| 6796 | Ube2d1   | 1.1  | 72   | 9.89   | 49   | 10.92  |   |
| 6797 | Cetn2    | 1.1  | 57   | 10.54  | 43   | 11.63  |   |
| 6798 | Sox12    | 1.1  | 54   | 13.19  | 41   | 14.55  |   |
| 6799 | Wdr4     | 1.1  | 84   | 3.73   | 64   | 4.11   |   |

Supplemental Table 2  
Vehicle versus FSH, 24 hours

|      | A         | B   | C   | D     | E   | F     | G |
|------|-----------|-----|-----|-------|-----|-------|---|
| 6800 | Pnlsr     | 1.1 | 384 | 18.15 | 345 | 20.03 |   |
| 6801 | Plekha3   | 1.1 | 157 | 20.14 | 115 | 22.22 |   |
| 6802 | Arfgef1   | 1.1 | 540 | 16.07 | 378 | 17.73 |   |
| 6803 | Ccdc115   | 1.1 | 116 | 14.9  | 85  | 16.43 |   |
| 6804 | Lamtor1   | 1.1 | 143 | 67.4  | 164 | 74.31 |   |
| 6805 | Nit1      | 1.1 | 138 | 20.93 | 117 | 23.07 |   |
| 6806 | Stx17     | 1.1 | 46  | 4.36  | 48  | 4.8   |   |
| 6807 | Tmem199   | 1.1 | 59  | 10.75 | 45  | 11.85 |   |
| 6808 | Ufl1      | 1.1 | 175 | 9.41  | 131 | 10.37 |   |
| 6809 | Cbx8      | 1.1 | 32  | 5.32  | 22  | 5.87  |   |
| 6810 | Malt1     | 1.1 | 76  | 2.93  | 51  | 3.23  |   |
| 6811 | Ppp1r26   | 1.1 | 108 | 8.89  | 84  | 9.79  |   |
| 6812 | Baz2a     | 1.1 | 322 | 14.49 | 247 | 15.97 |   |
| 6813 | Cdc34     | 1.1 | 186 | 42.36 | 144 | 46.69 |   |
| 6814 | Ubap1     | 1.1 | 219 | 17.58 | 173 | 19.37 |   |
| 6815 | Akap8     | 1.1 | 256 | 13.52 | 189 | 14.89 |   |
| 6816 | Psmd6     | 1.1 | 209 | 34.78 | 166 | 38.31 |   |
| 6817 | Eif3k     | 1.1 | 266 | 61.67 | 229 | 67.91 |   |
| 6818 | Vdac3     | 1.1 | 412 | 69.23 | 309 | 76.24 |   |
| 6819 | Get4      | 1.1 | 217 | 23.12 | 167 | 25.45 |   |
| 6820 | Clspn     | 1.1 | 22  | 1.63  | 15  | 1.79  |   |
| 6821 | Nlr1      | 1.1 | 39  | 2.82  | 33  | 3.1   |   |
| 6822 | Alg1      | 1.1 | 54  | 4.53  | 30  | 4.98  |   |
| 6823 | Dhx38     | 1.1 | 283 | 14.86 | 207 | 16.36 |   |
| 6824 | Wdr60     | 1.1 | 48  | 2.36  | 52  | 2.6   |   |
| 6825 | Zfp668    | 1.1 | 91  | 4.87  | 70  | 5.37  |   |
| 6826 | Eif2ak1   | 1.1 | 255 | 22.27 | 195 | 24.51 |   |
| 6827 | Ciz1      | 1.1 | 246 | 10.55 | 197 | 11.61 |   |
| 6828 | Dctn3     | 1.1 | 126 | 26.85 | 89  | 29.54 |   |
| 6829 | Cyfp2     | 1.1 | 403 | 13.4  | 307 | 14.74 |   |
| 6830 | Gphn      | 1.1 | 163 | 8.73  | 145 | 9.6   |   |
| 6831 | Med13     | 1.1 | 648 | 18.98 | 477 | 20.88 |   |
| 6832 | Camta1_1  | 1.1 | 96  | 5.52  | 70  | 6.08  |   |
| 6833 | Eif6      | 1.1 | 382 | 73.9  | 290 | 81.27 |   |
| 6834 | Traf4     | 1.1 | 123 | 14.3  | 96  | 15.72 |   |
| 6835 | Smchd1    | 1.1 | 297 | 10.01 | 234 | 11    |   |
| 6836 | Nup188    | 1.1 | 635 | 29.22 | 465 | 32.11 |   |
| 6837 | Cpox      | 1.1 | 83  | 7.43  | 69  | 8.16  |   |
| 6838 | Prmt3     | 1.1 | 101 | 7.44  | 76  | 8.18  |   |
| 6839 | Fbxl5     | 1.1 | 183 | 10.89 | 137 | 11.97 |   |
| 6840 | Mcf2      | 1.1 | 173 | 21.96 | 136 | 24.13 |   |
| 6841 | Atp6v1a   | 1.1 | 274 | 18.31 | 214 | 20.11 |   |
| 6842 | Jade3     | 1.1 | 123 | 9.09  | 83  | 9.98  |   |
| 6843 | Mrps27    | 1.1 | 165 | 9.52  | 108 | 10.45 |   |
| 6844 | Hif1an    | 1.1 | 56  | 8.38  | 36  | 9.2   |   |
| 6845 | Zfp612    | 1.1 | 72  | 5.53  | 48  | 6.07  |   |
| 6846 | Senp6     | 1.1 | 595 | 25.28 | 473 | 27.75 |   |
| 6847 | Zfp180    | 1.1 | 163 | 9.08  | 120 | 9.96  |   |
| 6848 | Arhgap31  | 1.1 | 592 | 17.98 | 404 | 19.73 |   |
| 6849 | Fam45a    | 1.1 | 81  | 9.45  | 56  | 10.37 |   |
| 6850 | Bend3     | 1.1 | 57  | 3.33  | 43  | 3.65  |   |
| 6851 | LOC688708 | 1.1 | 260 | 12.16 | 150 | 13.33 |   |
| 6852 | Mat2b     | 1.1 | 221 | 21.01 | 158 | 23.03 |   |
| 6853 | Dennd5b   | 1.1 | 249 | 10.36 | 183 | 11.35 |   |

Supplemental Table 2  
Vehicle versus FSH, 24 hours

|      | A              | B    | C    | D      | E    | F      | G |
|------|----------------|------|------|--------|------|--------|---|
| 6854 | Limk1          | 1.1  | 83   | 4.58   | 56   | 5.02   |   |
| 6855 | Slc39a5        | 1.1  | 61   | 5.37   | 46   | 5.89   |   |
| 6856 | Ubxn6          | 1.1  | 143  | 14.81  | 112  | 16.22  |   |
| 6857 | Ap5m1          | 1.1  | 91   | 5.4    | 77   | 5.92   |   |
| 6858 | Mbd6           | 1.1  | 125  | 8.14   | 94   | 8.92   |   |
| 6859 | Map3k10        | 1.1  | 95   | 4.58   | 77   | 5.02   |   |
| 6860 | Pik3c2b        | 1.1  | 93   | 1.78   | 64   | 1.95   |   |
| 6861 | Clint1         | 1.1  | 459  | 24.56  | 341  | 26.89  |   |
| 6862 | Skp2           | 1.1  | 87   | 5.79   | 62   | 6.35   |   |
| 6863 | Arnt2          | 1.09 | 187  | 6.17   | 134  | 6.75   |   |
| 6864 | Card6          | 1.09 | 238  | 8.85   | 183  | 9.68   |   |
| 6865 | Ppp2r3a        | 1.09 | 224  | 3.64   | 166  | 3.99   |   |
| 6866 | RGD1304884     | 1.09 | 90   | 5.67   | 70   | 6.21   |   |
| 6867 | Tsta3          | 1.09 | 100  | 15.25  | 74   | 16.68  |   |
| 6868 | Pak3           | 1.09 | 107  | 9.82   | 87   | 10.74  |   |
| 6869 | Fbxo33         | 1.09 | 135  | 8.2    | 98   | 8.96   |   |
| 6870 | Zfp354c        | 1.09 | 139  | 4.83   | 109  | 5.28   |   |
| 6871 | Kif5b          | 1.09 | 980  | 70.49  | 757  | 77.04  |   |
| 6872 | Cmas           | 1.09 | 151  | 18.42  | 109  | 20.13  |   |
| 6873 | Fam219b        | 1.09 | 135  | 10.68  | 112  | 11.67  |   |
| 6874 | Osbpl5         | 1.09 | 488  | 23.74  | 365  | 25.94  |   |
| 6875 | Daxx           | 1.09 | 178  | 14.73  | 117  | 16.1   |   |
| 6876 | Snapin         | 1.09 | 162  | 25.65  | 128  | 28.02  |   |
| 6877 | Tcf7l1         | 1.09 | 362  | 11.8   | 254  | 12.89  |   |
| 6878 | Rpl10a         | 1.09 | 103  | 215.71 | 117  | 235.47 |   |
| 6879 | Huwe1          | 1.09 | 1418 | 25.91  | 1036 | 28.24  |   |
| 6880 | AABR07026893.1 | 1.09 | 10   | 15.33  | 7    | 16.71  |   |
| 6881 | Nhp2_2         | 1.09 | 2    | 16.68  | 2    | 18.17  |   |
| 6882 | AABR07002885.1 | 1.09 | 0    | 0.29   | 0    | 0.32   |   |
| 6883 | AABR07064634.1 | 1.09 | 0    | 2.58   | 2    | 2.81   |   |
| 6884 | AABR07072539.3 | 1.09 | 0    | 1.17   | 0    | 1.27   |   |
| 6885 | AC103129.3     | 1.09 | 7    | 3.08   | 5    | 3.35   |   |
| 6886 | Adcy7          | 1.09 | 11   | 0.48   | 8    | 0.52   |   |
| 6887 | Ampd3          | 1.09 | 4    | 0.25   | 3    | 0.28   |   |
| 6888 | B4galt6        | 1.09 | 76   | 2.26   | 59   | 2.46   |   |
| 6889 | Bub1b          | 1.09 | 70   | 3.42   | 53   | 3.73   |   |
| 6890 | Cables2        | 1.09 | 45   | 4.84   | 34   | 5.28   |   |
| 6891 | Cactin         | 1.09 | 100  | 7.42   | 75   | 8.09   |   |
| 6892 | Casc1          | 1.09 | 22   | 0.77   | 41   | 0.84   |   |
| 6893 | Ccdc127        | 1.09 | 36   | 7.15   | 29   | 7.79   |   |
| 6894 | Ccdc176        | 1.09 | 34   | 0.45   | 21   | 0.49   |   |
| 6895 | Ccdc90b        | 1.09 | 57   | 9.17   | 50   | 9.99   |   |
| 6896 | Cd109          | 1.09 | 11   | 0.38   | 7    | 0.41   |   |
| 6897 | Cenpi          | 1.09 | 40   | 1.5    | 25   | 1.63   |   |
| 6898 | Cenpk          | 1.09 | 13   | 0.61   | 6    | 0.66   |   |
| 6899 | Clcn2          | 1.09 | 0    | 0.93   | 0    | 1.02   |   |
| 6900 | Emx2           | 1.09 | 4    | 0.34   | 3    | 0.37   |   |
| 6901 | Fxn            | 1.09 | 39   | 7.47   | 36   | 8.14   |   |
| 6902 | Galnt1l6_2     | 1.09 | 6    | 1.52   | 5    | 1.66   |   |
| 6903 | Gpr63          | 1.09 | 9    | 0.41   | 7    | 0.45   |   |
| 6904 | Hipk4          | 1.09 | 13   | 0.42   | 3    | 0.45   |   |
| 6905 | Hpx            | 1.09 | 7    | 0.64   | 4    | 0.69   |   |
| 6906 | Incenp         | 1.09 | 108  | 6.43   | 83   | 7.01   |   |
| 6907 | Khk            | 1.09 | 8    | 0.7    | 11   | 0.76   |   |



Supplemental Table 2  
Vehicle versus FSH, 24 hours

|      | A              | B    | C   | D     | E   | F     | G |
|------|----------------|------|-----|-------|-----|-------|---|
| 6908 | Klc3           | 1.09 | 6   | 0.57  | 2   | 0.62  |   |
| 6909 | LOC100360726   | 1.09 | 28  | 1.46  | 21  | 1.59  |   |
| 6910 | LOC100362338   | 1.09 | 0   | 5.99  | 0   | 6.52  |   |
| 6911 | LOC498122      | 1.09 | 36  | 5.6   | 27  | 6.1   |   |
| 6912 | Lyz2           | 1.09 | 6   | 1.68  | 4   | 1.83  |   |
| 6913 | Mamdc4         | 1.09 | 11  | 0.26  | 10  | 0.28  |   |
| 6914 | Med8           | 1.09 | 20  | 7.69  | 16  | 8.38  |   |
| 6915 | Medag          | 1.09 | 8   | 0.45  | 7   | 0.49  |   |
| 6916 | Mpeg1          | 1.09 | 4   | 0.44  | 3   | 0.48  |   |
| 6917 | Mtx3           | 1.09 | 44  | 4.33  | 34  | 4.72  |   |
| 6918 | Nop9           | 1.09 | 93  | 8.49  | 59  | 9.25  |   |
| 6919 | Nrg2           | 1.09 | 26  | 0.31  | 23  | 0.34  |   |
| 6920 | Nsun6          | 1.09 | 52  | 2.94  | 38  | 3.2   |   |
| 6921 | Nudt18         | 1.09 | 38  | 6.47  | 29  | 7.05  |   |
| 6922 | Ormdl1         | 1.09 | 71  | 2.7   | 39  | 2.94  |   |
| 6923 | Papd4          | 1.09 | 189 | 12.96 | 138 | 14.12 |   |
| 6924 | Pcdhgb1        | 1.09 | 3   | 0.49  | 5   | 0.53  |   |
| 6925 | Polr3c         | 1.09 | 139 | 12.22 | 113 | 13.32 |   |
| 6926 | Prr16          | 1.09 | 4   | 0.36  | 3   | 0.39  |   |
| 6927 | Prr7           | 1.09 | 8   | 2.05  | 6   | 2.24  |   |
| 6928 | Rap1gap        | 1.09 | 7   | 0.3   | 6   | 0.33  |   |
| 6929 | Rhbdd2         | 1.09 | 85  | 10.55 | 66  | 11.5  |   |
| 6930 | Rin1           | 1.09 | 0   | 0.2   | 0   | 0.22  |   |
| 6931 | Rn60_4_2163.2  | 1.09 | 0   | 5.01  | 1   | 5.46  |   |
| 6932 | Rph3al         | 1.09 | 9   | 0.5   | 22  | 0.55  |   |
| 6933 | Rpl36al_1      | 1.09 | 0   | 3.1   | 0   | 3.38  |   |
| 6934 | Rpl37-ps1      | 1.09 | 0   | 3.39  | 0   | 3.69  |   |
| 6935 | Rwdd2a         | 1.09 | 5   | 0.66  | 4   | 0.72  |   |
| 6936 | Sac3d1         | 1.09 | 30  | 5.45  | 23  | 5.94  |   |
| 6937 | Shank2_2       | 1.09 | 11  | 0.31  | 9   | 0.34  |   |
| 6938 | Slc26a10       | 1.09 | 5   | 0.34  | 2   | 0.37  |   |
| 6939 | SNORA44_18     | 1.09 | 0   | 7.73  | 0   | 8.42  |   |
| 6940 | SNORD123       | 1.09 | 4   | 14.24 | 3   | 15.52 |   |
| 6941 | Snx32          | 1.09 | 25  | 1.64  | 8   | 1.79  |   |
| 6942 | Spink13        | 1.09 | 37  | 1.53  | 92  | 1.66  |   |
| 6943 | St14           | 1.09 | 11  | 0.62  | 7   | 0.68  |   |
| 6944 | Tceanc         | 1.09 | 4   | 0.93  | 3   | 1.01  |   |
| 6945 | Triqk          | 1.09 | 23  | 2.6   | 13  | 2.84  |   |
| 6946 | Zfp362         | 1.09 | 89  | 11.89 | 77  | 12.96 |   |
| 6947 | Zfp383_2       | 1.09 | 0   | 0.38  | 0   | 0.42  |   |
| 6948 | Zfp536         | 1.09 | 17  | 0.46  | 13  | 0.5   |   |
| 6949 | Zfp711         | 1.09 | 48  | 1.49  | 37  | 1.62  |   |
| 6950 | Zkscan2        | 1.09 | 9   | 0.3   | 7   | 0.33  |   |
| 6951 | Zrsr2          | 1.09 | 62  | 2.73  | 59  | 2.97  |   |
| 6952 | AABR07024908.1 | 1.09 | 0   | 2.97  | 0   | 3.23  |   |
| 6953 | Adamts16       | 1.09 | 40  | 1.09  | 24  | 1.19  |   |
| 6954 | Apom           | 1.09 | 7   | 1.01  | 3   | 1.1   |   |
| 6955 | Daam1          | 1.09 | 447 | 15.15 | 352 | 16.52 |   |
| 6956 | Fblim1         | 1.09 | 9   | 0.33  | 5   | 0.36  |   |
| 6957 | Fmo4           | 1.09 | 6   | 0.42  | 5   | 0.46  |   |
| 6958 | Fmod           | 1.09 | 8   | 0.56  | 7   | 0.61  |   |
| 6959 | Hiat1_2        | 1.09 | 0   | 1.07  | 0   | 1.17  |   |
| 6960 | Il3ra          | 1.09 | 48  | 6.39  | 49  | 6.97  |   |
| 6961 | Rbm46          | 1.09 | 6   | 0.56  | 4   | 0.61  |   |

Supplemental Table 2  
Vehicle versus FSH, 24 hours

|      | A            | B    | C    | D      | E    | F       | G |
|------|--------------|------|------|--------|------|---------|---|
| 6962 | Relt         | 1.09 | 31   | 2.52   | 23   | 2.74    |   |
| 6963 | Serf1        | 1.09 | 9    | 4.34   | 10   | 4.73    |   |
| 6964 | Hspa5        | 1.09 | 3183 | 309.46 | 2384 | 337.05  |   |
| 6965 | Srsf1        | 1.09 | 663  | 31.65  | 490  | 34.46   |   |
| 6966 | Pxdn         | 1.09 | 670  | 34.63  | 492  | 37.7    |   |
| 6967 | Brd1         | 1.09 | 486  | 17.22  | 346  | 18.75   |   |
| 6968 | Ssr2         | 1.09 | 445  | 100.24 | 335  | 109.07  |   |
| 6969 | Atp6v0e1     | 1.09 | 242  | 22.2   | 177  | 24.16   |   |
| 6970 | Il4r         | 1.09 | 400  | 25.89  | 316  | 28.16   |   |
| 6971 | Mt-atp6      | 1.09 | 7688 | 2829   | 5723 | 3076.79 |   |
| 6972 | Gtf3c4       | 1.09 | 292  | 9.92   | 206  | 10.78   |   |
| 6973 | Tmem185a     | 1.09 | 151  | 13.18  | 106  | 14.32   |   |
| 6974 | Gosr2        | 1.09 | 284  | 31     | 215  | 33.69   |   |
| 6975 | Pitpnm1      | 1.09 | 139  | 7.36   | 100  | 8       |   |
| 6976 | Uqcrc2       | 1.09 | 385  | 52.46  | 293  | 56.97   |   |
| 6977 | RGD1309188   | 1.09 | 95   | 8.19   | 71   | 8.89    |   |
| 6978 | Supt5h       | 1.09 | 740  | 48.81  | 569  | 53      |   |
| 6979 | Umps         | 1.09 | 94   | 13.45  | 71   | 14.6    |   |
| 6980 | Vhl          | 1.09 | 190  | 15.71  | 141  | 17.06   |   |
| 6981 | Abhd17b      | 1.09 | 152  | 8.77   | 89   | 9.52    |   |
| 6982 | Polr3b       | 1.09 | 115  | 5.25   | 83   | 5.7     |   |
| 6983 | Rab35        | 1.09 | 181  | 19.81  | 136  | 21.5    |   |
| 6984 | Rnf214       | 1.09 | 117  | 8.51   | 92   | 9.24    |   |
| 6985 | Lancl2       | 1.09 | 91   | 11.31  | 71   | 12.28   |   |
| 6986 | Narfl        | 1.09 | 87   | 7.31   | 62   | 7.93    |   |
| 6987 | Nsfl1c       | 1.09 | 384  | 53.64  | 292  | 58.21   |   |
| 6988 | Dicer1       | 1.09 | 342  | 7.78   | 252  | 8.45    |   |
| 6989 | Nhlrc3       | 1.08 | 108  | 9.28   | 79   | 10.07   |   |
| 6990 | Sdf2         | 1.08 | 265  | 29.62  | 184  | 32.13   |   |
| 6991 | Fads1        | 1.08 | 657  | 46.32  | 490  | 50.24   |   |
| 6992 | LOC100912380 | 1.08 | 0    | 71.43  | 0    | 77.48   |   |
| 6993 | Mtch2        | 1.08 | 215  | 49.1   | 166  | 53.25   |   |
| 6994 | Lrrc8a       | 1.08 | 492  | 34.36  | 364  | 37.26   |   |
| 6995 | Anks1a       | 1.08 | 554  | 15.16  | 417  | 16.42   |   |
| 6996 | Hmg20a       | 1.08 | 301  | 15.62  | 227  | 16.92   |   |
| 6997 | Ptpn2        | 1.08 | 130  | 8.76   | 113  | 9.49    |   |
| 6998 | Smek1        | 1.08 | 293  | 18.09  | 232  | 19.58   |   |
| 6999 | Zeb2         | 1.08 | 855  | 33.44  | 689  | 36.19   |   |
| 7000 | LOC100909464 | 1.08 | 170  | 27.83  | 123  | 30.11   |   |
| 7001 | Pkn1         | 1.08 | 290  | 18.65  | 215  | 20.17   |   |
| 7002 | Fcho2        | 1.08 | 206  | 7.16   | 157  | 7.75    |   |
| 7003 | Clu          | 1.08 | 1765 | 230.58 | 1294 | 249.42  |   |
| 7004 | Diablo       | 1.08 | 87   | 25.61  | 58   | 27.7    |   |
| 7005 | Ddx59        | 1.08 | 63   | 4.99   | 43   | 5.39    |   |
| 7006 | Pdia6        | 1.08 | 1120 | 156.43 | 826  | 169.16  |   |
| 7007 | Pex16        | 1.08 | 46   | 6.91   | 36   | 7.47    |   |
| 7008 | Ptdss1       | 1.08 | 216  | 17.36  | 165  | 18.76   |   |
| 7009 | Rbm38        | 1.08 | 70   | 5.75   | 37   | 6.22    |   |
| 7010 | Trim46       | 1.08 | 51   | 2.66   | 39   | 2.87    |   |
| 7011 | Ahcyl1       | 1.08 | 489  | 32.44  | 366  | 35.03   |   |
| 7012 | Fam64a       | 1.08 | 38   | 6.07   | 24   | 6.56    |   |
| 7013 | Gemin8       | 1.08 | 44   | 7.52   | 34   | 8.12    |   |
| 7014 | Cenpf        | 1.08 | 78   | 1.73   | 56   | 1.87    |   |
| 7015 | Necap2       | 1.08 | 251  | 26.53  | 185  | 28.63   |   |

Supplemental Table 2  
Vehicle versus FSH, 24 hours

|      | A              | B    | C    | D     | E   | F     | G |
|------|----------------|------|------|-------|-----|-------|---|
| 7016 | Rab5a          | 1.08 | 80   | 16.03 | 40  | 17.3  |   |
| 7017 | Surf4          | 1.08 | 1049 | 64.53 | 776 | 69.61 |   |
| 7018 | Mtor           | 1.08 | 495  | 12.26 | 367 | 13.22 |   |
| 7019 | Jak2           | 1.08 | 157  | 6.66  | 105 | 7.18  |   |
| 7020 | Ubr2           | 1.08 | 649  | 21.05 | 477 | 22.71 |   |
| 7021 | Abi2           | 1.08 | 216  | 19.25 | 135 | 20.75 |   |
| 7022 | Mrps12         | 1.08 | 33   | 10.74 | 26  | 11.58 |   |
| 7023 | Acox3          | 1.08 | 158  | 8.93  | 107 | 9.63  |   |
| 7024 | Fuk            | 1.08 | 73   | 4.01  | 64  | 4.32  |   |
| 7025 | Mrpl50         | 1.08 | 29   | 4.32  | 18  | 4.65  |   |
| 7026 | Copb1          | 1.08 | 632  | 46.06 | 480 | 49.66 |   |
| 7027 | Atp11a         | 1.08 | 382  | 13.02 | 282 | 14.03 |   |
| 7028 | Zmym2          | 1.08 | 311  | 14.41 | 234 | 15.53 |   |
| 7029 | Srrt           | 1.08 | 262  | 40    | 203 | 43.1  |   |
| 7030 | Bre            | 1.08 | 125  | 9.43  | 131 | 10.16 |   |
| 7031 | Trappc3        | 1.08 | 141  | 21.33 | 125 | 22.98 |   |
| 7032 | AABR07063544.1 | 1.08 | 6    | 21.86 | 7   | 23.54 |   |
| 7033 | Sike1          | 1.08 | 96   | 8.92  | 66  | 9.6   |   |
| 7034 | Smarcc2        | 1.08 | 511  | 27.24 | 378 | 29.33 |   |
| 7035 | Zfp9           | 1.08 | 54   | 5.87  | 41  | 6.32  |   |
| 7036 | Zfp933         | 1.08 | 26   | 4.05  | 19  | 4.35  |   |
| 7037 | Nkiras2        | 1.08 | 110  | 12.06 | 80  | 12.98 |   |
| 7038 | Polr3f         | 1.08 | 108  | 4.39  | 72  | 4.72  |   |
| 7039 | Tbc1d2         | 1.08 | 39   | 1.56  | 36  | 1.68  |   |
| 7040 | Slc12a6        | 1.08 | 191  | 6.13  | 146 | 6.6   |   |
| 7041 | Zyg11b         | 1.08 | 129  | 9.7   | 102 | 10.44 |   |
| 7042 | Zfx            | 1.08 | 286  | 8.5   | 219 | 9.15  |   |
| 7043 | Elov1          | 1.08 | 318  | 46.37 | 239 | 49.86 |   |
| 7044 | Tada3          | 1.08 | 127  | 12.86 | 94  | 13.83 |   |
| 7045 | Atrip          | 1.08 | 36   | 4.71  | 46  | 5.06  |   |
| 7046 | Wdr77          | 1.08 | 0    | 4.25  | 0   | 4.57  |   |
| 7047 | Ppp2r4         | 1.08 | 820  | 72.28 | 563 | 77.7  |   |
| 7048 | Exoc3          | 1.07 | 165  | 14.49 | 121 | 15.58 |   |
| 7049 | Flad1          | 1.07 | 83   | 6.36  | 66  | 6.84  |   |
| 7050 | Slc38a7        | 1.07 | 168  | 9.61  | 138 | 10.33 |   |
| 7051 | Tpgs2          | 1.07 | 158  | 39.84 | 128 | 42.81 |   |
| 7052 | Bard1          | 1.07 | 50   | 1.65  | 27  | 1.77  |   |
| 7053 | Cpsf4          | 1.07 | 96   | 13.35 | 63  | 14.34 |   |
| 7054 | Dnajb6         | 1.07 | 228  | 11.7  | 143 | 12.57 |   |
| 7055 | Rab31          | 1.07 | 205  | 10.28 | 150 | 11.04 |   |
| 7056 | Sowahc         | 1.07 | 161  | 8.98  | 118 | 9.65  |   |
| 7057 | Ttc19          | 1.07 | 68   | 5.22  | 53  | 5.61  |   |
| 7058 | Zbtb37         | 1.07 | 30   | 2.32  | 23  | 2.49  |   |
| 7059 | Irgq           | 1.07 | 25   | 2.87  | 22  | 3.09  |   |
| 7060 | Heatr6         | 1.07 | 200  | 11.03 | 150 | 11.84 |   |
| 7061 | Asph           | 1.07 | 353  | 5.65  | 226 | 6.07  |   |
| 7062 | Cwc25          | 1.07 | 86   | 5.06  | 57  | 5.43  |   |
| 7063 | Adipor1        | 1.07 | 598  | 68.66 | 447 | 73.67 |   |
| 7064 | Dmxl2          | 1.07 | 51   | 0.99  | 38  | 1.06  |   |
| 7065 | Fam178a        | 1.07 | 270  | 7.46  | 212 | 8     |   |
| 7066 | Sgta           | 1.07 | 279  | 23.97 | 218 | 25.7  |   |
| 7067 | Tpd52l2        | 1.07 | 159  | 15.2  | 141 | 16.3  |   |
| 7068 | Chp1           | 1.07 | 206  | 25.08 | 154 | 26.89 |   |
| 7069 | Rn60_1_1359.1  | 1.07 | 90   | 4.6   | 62  | 4.93  |   |

Supplemental Table 2  
Vehicle versus FSH, 24 hours

|      | A            | B    | C    | D      | E    | F      | G |
|------|--------------|------|------|--------|------|--------|---|
| 7070 | RGD1561931   | 1.07 | 172  | 4.89   | 131  | 5.24   |   |
| 7071 | Gprasp2      | 1.07 | 143  | 12.42  | 106  | 13.32  |   |
| 7072 | Aak1         | 1.07 | 225  | 3.22   | 220  | 3.45   |   |
| 7073 | Mcm9         | 1.07 | 98   | 2.49   | 92   | 2.67   |   |
| 7074 | RGD1307235   | 1.07 | 220  | 5.57   | 160  | 5.97   |   |
| 7075 | Rnf41        | 1.07 | 426  | 32.34  | 311  | 34.66  |   |
| 7076 | Nfia         | 1.07 | 935  | 32.08  | 722  | 34.38  |   |
| 7077 | Rps17        | 1.07 | 25   | 405.43 | 37   | 434.48 |   |
| 7078 | Rest         | 1.07 | 352  | 19.92  | 255  | 21.35  |   |
| 7079 | Mapk8ip3     | 1.07 | 326  | 11.24  | 240  | 12.04  |   |
| 7080 | Braf         | 1.07 | 222  | 10.43  | 182  | 11.18  |   |
| 7081 | Cep85        | 1.07 | 126  | 5.41   | 95   | 5.8    |   |
| 7082 | Fbxo28       | 1.07 | 177  | 16.48  | 141  | 17.66  |   |
| 7083 | Use1         | 1.07 | 112  | 23.9   | 86   | 25.61  |   |
| 7084 | Zfp746       | 1.07 | 176  | 7.97   | 114  | 8.53   |   |
| 7085 | Cdh2         | 1.07 | 1494 | 76.49  | 1107 | 81.94  |   |
| 7086 | Acly         | 1.07 | 1656 | 83.9   | 1180 | 89.87  |   |
| 7087 | Adamts13     | 1.07 | 26   | 0.64   | 24   | 0.68   |   |
| 7088 | Atg101       | 1.07 | 114  | 16.53  | 84   | 17.7   |   |
| 7089 | Btd9         | 1.07 | 146  | 4.85   | 95   | 5.19   |   |
| 7090 | Cyb561a3     | 1.07 | 77   | 7.05   | 56   | 7.55   |   |
| 7091 | Igfbp2       | 1.07 | 20   | 3.7    | 14   | 3.96   |   |
| 7092 | Pygo1        | 1.07 | 87   | 4.11   | 61   | 4.4    |   |
| 7093 | Tmem62       | 1.07 | 51   | 4.9    | 37   | 5.25   |   |
| 7094 | Impact       | 1.07 | 252  | 16.61  | 194  | 17.77  |   |
| 7095 | Thrap3       | 1.07 | 885  | 52.06  | 653  | 55.72  |   |
| 7096 | Dhx8         | 1.07 | 212  | 10.79  | 158  | 11.54  |   |
| 7097 | Ube2o        | 1.07 | 339  | 20.39  | 268  | 21.81  |   |
| 7098 | LOC100151767 | 1.07 | 110  | 9.04   | 83   | 9.67   |   |
| 7099 | Gpmb         | 1.07 | 128  | 13.51  | 96   | 14.45  |   |
| 7100 | Ubxn7        | 1.07 | 62   | 18.4   | 51   | 19.68  |   |
| 7101 | RGD1565775   | 1.07 | 359  | 21.5   | 275  | 22.99  |   |
| 7102 | Cmip         | 1.07 | 424  | 13.2   | 342  | 14.11  |   |
| 7103 | Ppie         | 1.07 | 106  | 17.37  | 71   | 18.57  |   |
| 7104 | Stx16        | 1.07 | 239  | 10.76  | 182  | 11.5   |   |
| 7105 | Pfkfb2       | 1.07 | 83   | 1.87   | 60   | 2      |   |
| 7106 | Scamp5       | 1.07 | 40   | 2.91   | 30   | 3.11   |   |
| 7107 | Slc16a13     | 1.07 | 39   | 4.45   | 32   | 4.76   |   |
| 7108 | Snopc4       | 1.07 | 43   | 2.11   | 37   | 2.26   |   |
| 7109 | Usb1         | 1.07 | 44   | 3.96   | 38   | 4.23   |   |
| 7110 | Zc3h18       | 1.07 | 347  | 15.37  | 258  | 16.42  |   |
| 7111 | Zfp422       | 1.07 | 141  | 14.25  | 103  | 15.23  |   |
| 7112 | Aagab        | 1.07 | 89   | 11.21  | 53   | 11.97  |   |
| 7113 | Pat1         | 1.07 | 219  | 12.17  | 161  | 12.99  |   |
| 7114 | Ppp3ca       | 1.07 | 410  | 25.82  | 323  | 27.55  |   |
| 7115 | Smarce1      | 1.07 | 523  | 36.69  | 391  | 39.15  |   |
| 7116 | Myo6         | 1.07 | 391  | 11.16  | 283  | 11.91  |   |
| 7117 | Dennd4c      | 1.07 | 298  | 9.37   | 216  | 10     |   |
| 7118 | Syt11        | 1.07 | 182  | 10.12  | 139  | 10.8   |   |
| 7119 | Klf11        | 1.07 | 132  | 7.18   | 95   | 7.66   |   |
| 7120 | Pcbp2        | 1.07 | 377  | 88.92  | 304  | 94.82  |   |
| 7121 | Wbp2         | 1.07 | 169  | 48.39  | 125  | 51.59  |   |
| 7122 | Ankrd24      | 1.07 | 12   | 1.08   | 10   | 1.15   |   |
| 7123 | Ankrd9       | 1.07 | 16   | 2.57   | 11   | 2.74   |   |

Supplemental Table 2  
Vehicle versus FSH, 24 hours

|      | A          | B    | C    | D      | E    | F      | G |
|------|------------|------|------|--------|------|--------|---|
| 7124 | Dcaf11     | 1.07 | 233  | 18.32  | 181  | 19.52  |   |
| 7125 | Dok4       | 1.07 | 35   | 4.91   | 32   | 5.23   |   |
| 7126 | Fam133b    | 1.07 | 47   | 5.06   | 49   | 5.4    |   |
| 7127 | Minpp1     | 1.07 | 181  | 23.61  | 122  | 25.15  |   |
| 7128 | Ns5atp9    | 1.07 | 12   | 11.22  | 9    | 11.96  |   |
| 7129 | Ocrl       | 1.07 | 136  | 5.02   | 101  | 5.34   |   |
| 7130 | Setdb2     | 1.07 | 54   | 3.48   | 40   | 3.71   |   |
| 7131 | Them5      | 1.07 | 24   | 3.11   | 22   | 3.31   |   |
| 7132 | Zdhhc3     | 1.07 | 342  | 14.72  | 210  | 15.69  |   |
| 7133 | Ankrd44    | 1.07 | 123  | 4.7    | 121  | 5.01   |   |
| 7134 | Areg       | 1.07 | 19   | 3.28   | 13   | 3.49   |   |
| 7135 | Fbxo10     | 1.07 | 125  | 4.57   | 82   | 4.87   |   |
| 7136 | Mphosph6   | 1.07 | 51   | 7.04   | 28   | 7.5    |   |
| 7137 | Sgk3       | 1.07 | 25   | 2.51   | 29   | 2.67   |   |
| 7138 | Rpl13a     | 1.07 | 424  | 810.6  | 291  | 863.76 |   |
| 7139 | Eif3d      | 1.07 | 570  | 71.96  | 417  | 76.66  |   |
| 7140 | Npl        | 1.06 | 136  | 8.48   | 99   | 9.03   |   |
| 7141 | Tmx2       | 1.06 | 147  | 21.98  | 106  | 23.39  |   |
| 7142 | Tsg101     | 1.06 | 341  | 48.37  | 265  | 51.48  |   |
| 7143 | Nedd4      | 1.06 | 6156 | 266.07 | 4515 | 283.12 |   |
| 7144 | Kmt2e      | 1.06 | 719  | 19.4   | 530  | 20.64  |   |
| 7145 | Brf1       | 1.06 | 147  | 10.16  | 141  | 10.8   |   |
| 7146 | Fibin      | 1.06 | 41   | 4.5    | 30   | 4.78   |   |
| 7147 | MGC95210   | 1.06 | 53   | 3.14   | 38   | 3.34   |   |
| 7148 | Bet1l      | 1.06 | 125  | 22.21  | 91   | 23.61  |   |
| 7149 | Calhm2     | 1.06 | 101  | 11.16  | 64   | 11.86  |   |
| 7150 | Lsm14b     | 1.06 | 116  | 15.49  | 89   | 16.47  |   |
| 7151 | Zfat       | 1.06 | 88   | 2.3    | 58   | 2.44   |   |
| 7152 | Mpzl1      | 1.06 | 204  | 16.13  | 151  | 17.15  |   |
| 7153 | Cry2       | 1.06 | 213  | 10.98  | 161  | 11.67  |   |
| 7154 | AC111257.1 | 1.06 | 18   | 4.91   | 15   | 5.22   |   |
| 7155 | AC128212.1 | 1.06 | 39   | 16.86  | 36   | 17.92  |   |
| 7156 | Kif21a     | 1.06 | 93   | 3.33   | 84   | 3.54   |   |
| 7157 | Sec23a     | 1.06 | 295  | 16.52  | 215  | 17.56  |   |
| 7158 | Tbc1d10a   | 1.06 | 94   | 11     | 76   | 11.69  |   |
| 7159 | Fchsd2     | 1.06 | 161  | 5.19   | 143  | 5.51   |   |
| 7160 | Arfgap3    | 1.06 | 159  | 11.8   | 116  | 12.54  |   |
| 7161 | Rnpep      | 1.06 | 161  | 15.49  | 117  | 16.46  |   |
| 7162 | Cops6      | 1.06 | 177  | 36.32  | 130  | 38.58  |   |
| 7163 | Zfp655     | 1.06 | 168  | 10.66  | 109  | 11.32  |   |
| 7164 | Zfp282     | 1.06 | 272  | 11.48  | 195  | 12.2   |   |
| 7165 | Ddx10      | 1.06 | 102  | 5.79   | 78   | 6.15   |   |
| 7166 | Ddx55      | 1.06 | 21   | 2.76   | 16   | 2.94   |   |
| 7167 | Heca       | 1.06 | 152  | 6.76   | 99   | 7.17   |   |
| 7168 | Kif13b     | 1.06 | 207  | 6.66   | 180  | 7.08   |   |
| 7169 | Slc35b3    | 1.06 | 88   | 3.39   | 77   | 3.6    |   |
| 7170 | Wasl       | 1.06 | 388  | 16.36  | 278  | 17.38  |   |
| 7171 | Usp9x      | 1.06 | 1715 | 30.87  | 1183 | 32.78  |   |
| 7172 | Zcchc17    | 1.06 | 133  | 12.61  | 115  | 13.39  |   |
| 7173 | Cdc42bpb   | 1.06 | 795  | 24.89  | 568  | 26.41  |   |
| 7174 | Ubn1       | 1.06 | 407  | 13.32  | 295  | 14.13  |   |
| 7175 | Mrpl51     | 1.06 | 126  | 13.27  | 92   | 14.08  |   |
| 7176 | Timm22     | 1.06 | 104  | 13.83  | 76   | 14.68  |   |
| 7177 | Ttc1       | 1.06 | 168  | 17.36  | 113  | 18.42  |   |

Supplemental Table 2  
Vehicle versus FSH, 24 hours

|      | A          | B    | C    | D      | E   | F      | G |
|------|------------|------|------|--------|-----|--------|---|
| 7178 | Zfp335     | 1.06 | 214  | 10.18  | 155 | 10.8   |   |
| 7179 | Ssb        | 1.06 | 134  | 22.49  | 96  | 23.84  |   |
| 7180 | Chchd1     | 1.06 | 39   | 16.67  | 31  | 17.68  |   |
| 7181 | Tmco1      | 1.06 | 78   | 16.03  | 64  | 16.99  |   |
| 7182 | Snx9       | 1.06 | 194  | 18.6   | 135 | 19.71  |   |
| 7183 | Ubf        | 1.06 | 482  | 23.52  | 345 | 24.92  |   |
| 7184 | Ripk1      | 1.06 | 190  | 8.53   | 123 | 9.04   |   |
| 7185 | Thoc7      | 1.06 | 200  | 20.14  | 140 | 21.33  |   |
| 7186 | Polr3d     | 1.06 | 140  | 16.95  | 99  | 17.95  |   |
| 7187 | Fbxo11     | 1.06 | 230  | 14.78  | 165 | 15.65  |   |
| 7188 | Timeless   | 1.06 | 116  | 5.37   | 83  | 5.69   |   |
| 7189 | Stxbp3     | 1.06 | 170  | 10.17  | 125 | 10.76  |   |
| 7190 | Las1l      | 1.06 | 151  | 9.42   | 114 | 9.96   |   |
| 7191 | Plekha2    | 1.06 | 414  | 30.22  | 299 | 31.97  |   |
| 7192 | Mlxip      | 1.06 | 180  | 7.5    | 119 | 7.93   |   |
| 7193 | Urb1       | 1.06 | 198  | 5.35   | 145 | 5.66   |   |
| 7194 | Anapc15    | 1.06 | 11   | 6.87   | 10  | 7.26   |   |
| 7195 | Ccdc125    | 1.06 | 19   | 1.2    | 20  | 1.27   |   |
| 7196 | Cdk13      | 1.06 | 302  | 11.48  | 230 | 12.13  |   |
| 7197 | Dnhd1      | 1.06 | 41   | 0.55   | 35  | 0.58   |   |
| 7198 | Itn1       | 1.06 | 267  | 10.92  | 178 | 11.54  |   |
| 7199 | Mrpl42     | 1.06 | 61   | 20.42  | 47  | 21.58  |   |
| 7200 | Ndufv1     | 1.06 | 192  | 28.85  | 141 | 30.49  |   |
| 7201 | Nusap1     | 1.06 | 49   | 1.95   | 37  | 2.07   |   |
| 7202 | Otud3      | 1.06 | 40   | 1.44   | 23  | 1.52   |   |
| 7203 | Pask       | 1.06 | 53   | 1.78   | 37  | 1.88   |   |
| 7204 | Per1       | 1.06 | 124  | 7.45   | 89  | 7.87   |   |
| 7205 | Rbfa       | 1.06 | 68   | 8.42   | 55  | 8.9    |   |
| 7206 | Slc38a1    | 1.06 | 75   | 4.81   | 41  | 5.08   |   |
| 7207 | Uqcrh      | 1.06 | 267  | 105.22 | 183 | 111.2  |   |
| 7208 | RGD1310852 | 1.06 | 51   | 2.52   | 43  | 2.66   |   |
| 7209 | Tmpo       | 1.06 | 1332 | 44.51  | 985 | 47.03  |   |
| 7210 | Ppp6r3     | 1.06 | 525  | 21.41  | 411 | 22.61  |   |
| 7211 | Rab11fip3  | 1.06 | 178  | 8.81   | 123 | 9.3    |   |
| 7212 | Rela       | 1.06 | 344  | 32.43  | 244 | 34.24  |   |
| 7213 | Fam76b     | 1.06 | 153  | 6.35   | 117 | 6.7    |   |
| 7214 | Copa       | 1.06 | 1352 | 63.47  | 916 | 66.99  |   |
| 7215 | Cdc20      | 1.06 | 86   | 11.8   | 61  | 12.45  |   |
| 7216 | Armcx1_2   | 1.06 | 8    | 8.56   | 9   | 9.03   |   |
| 7217 | Pdpk1      | 1.06 | 134  | 9.68   | 99  | 10.21  |   |
| 7218 | Vps33a     | 1.06 | 85   | 5.68   | 65  | 5.99   |   |
| 7219 | Hspd1      | 1.05 | 503  | 79.21  | 376 | 83.57  |   |
| 7220 | Cdc123     | 1.05 | 196  | 23.68  | 145 | 24.97  |   |
| 7221 | Baz2b      | 1.05 | 426  | 10.64  | 347 | 11.22  |   |
| 7222 | Smad1      | 1.05 | 226  | 8.89   | 176 | 9.36   |   |
| 7223 | Zfc3h1     | 1.05 | 290  | 8.78   | 215 | 9.25   |   |
| 7224 | Tmed2      | 1.05 | 967  | 122.67 | 702 | 129.26 |   |
| 7225 | Rtcb       | 1.05 | 200  | 33.34  | 139 | 35.13  |   |
| 7226 | Nxf1       | 1.05 | 545  | 45.05  | 438 | 47.45  |   |
| 7227 | Sap30bp    | 1.05 | 130  | 8.58   | 106 | 9.03   |   |
| 7228 | Ccnk       | 1.05 | 172  | 12.4   | 114 | 13.05  |   |
| 7229 | Atp2c1     | 1.05 | 237  | 17.64  | 178 | 18.57  |   |
| 7230 | Dda1       | 1.05 | 139  | 19.45  | 106 | 20.48  |   |
| 7231 | Elk4       | 1.05 | 255  | 12.17  | 155 | 12.81  |   |

Supplemental Table 2  
Vehicle versus FSH, 24 hours

|      | A            | B    | C    | D      | E    | F      | G |
|------|--------------|------|------|--------|------|--------|---|
| 7232 | Tmem63b      | 1.05 | 280  | 19.39  | 195  | 20.42  |   |
| 7233 | Stk11        | 1.05 | 310  | 21.17  | 230  | 22.29  |   |
| 7234 | Tanc2        | 1.05 | 828  | 15.79  | 734  | 16.62  |   |
| 7235 | Uqcrrf1      | 1.05 | 299  | 67.52  | 216  | 71.08  |   |
| 7236 | BC055324     | 1.05 | 60   | 2.29   | 50   | 2.41   |   |
| 7237 | Lcmt2        | 1.05 | 29   | 3.4    | 20   | 3.58   |   |
| 7238 | Tipin        | 1.05 | 30   | 8.54   | 24   | 8.99   |   |
| 7239 | Sdhd         | 1.05 | 176  | 33.29  | 121  | 35.02  |   |
| 7240 | Prmt7        | 1.05 | 152  | 13.58  | 113  | 14.29  |   |
| 7241 | Fbxo3        | 1.05 | 274  | 10.45  | 199  | 10.99  |   |
| 7242 | Usp45        | 1.05 | 159  | 4.95   | 128  | 5.2    |   |
| 7243 | Rcor1_2      | 1.05 | 187  | 15.57  | 136  | 16.37  |   |
| 7244 | Herc3        | 1.05 | 136  | 4.48   | 110  | 4.71   |   |
| 7245 | Btbd7        | 1.05 | 339  | 15.96  | 234  | 16.77  |   |
| 7246 | Pole4        | 1.05 | 69   | 6.22   | 46   | 6.54   |   |
| 7247 | RGD1564541   | 1.05 | 74   | 4.48   | 52   | 4.71   |   |
| 7248 | Tfcp2        | 1.05 | 166  | 9.24   | 133  | 9.71   |   |
| 7249 | Zc3h10       | 1.05 | 69   | 7.81   | 48   | 8.2    |   |
| 7250 | Rps24        | 1.05 | 174  | 168.78 | 107  | 177.31 |   |
| 7251 | Mex3c        | 1.05 | 293  | 24.35  | 208  | 25.58  |   |
| 7252 | Rdh11        | 1.05 | 125  | 15.3   | 97   | 16.07  |   |
| 7253 | Raf1         | 1.05 | 622  | 43.25  | 464  | 45.41  |   |
| 7254 | Abca9        | 1.05 | 109  | 4.6    | 75   | 4.83   |   |
| 7255 | Galc         | 1.05 | 30   | 3.66   | 23   | 3.84   |   |
| 7256 | Mob3c        | 1.05 | 23   | 1.29   | 15   | 1.36   |   |
| 7257 | Rab8b        | 1.05 | 129  | 6.09   | 97   | 6.39   |   |
| 7258 | Rnf121       | 1.05 | 61   | 5.21   | 52   | 5.46   |   |
| 7259 | Anapc1       | 1.05 | 520  | 13.5   | 378  | 14.17  |   |
| 7260 | Anp32b       | 1.05 | 507  | 83.61  | 352  | 87.7   |   |
| 7261 | Poldip3      | 1.05 | 520  | 29.37  | 352  | 30.81  |   |
| 7262 | Bclaf1       | 1.05 | 749  | 16.21  | 647  | 17     |   |
| 7263 | Emc8         | 1.05 | 147  | 31.18  | 109  | 32.7   |   |
| 7264 | Acat1        | 1.05 | 139  | 13.11  | 103  | 13.75  |   |
| 7265 | Tmem14c      | 1.05 | 91   | 20.71  | 67   | 21.72  |   |
| 7266 | Pabpc1       | 1.05 | 1991 | 176.71 | 1431 | 185.27 |   |
| 7267 | Ears2_1      | 1.05 | 43   | 7.75   | 22   | 8.12   |   |
| 7268 | Psmc2        | 1.05 | 399  | 59.41  | 288  | 62.27  |   |
| 7269 | Trabd        | 1.05 | 238  | 17.15  | 157  | 17.98  |   |
| 7270 | Paf1         | 1.05 | 214  | 26.63  | 156  | 27.91  |   |
| 7271 | Abi1         | 1.05 | 455  | 24.39  | 293  | 25.56  |   |
| 7272 | Git1         | 1.05 | 535  | 40.52  | 377  | 42.45  |   |
| 7273 | Hebp2        | 1.05 | 43   | 9.37   | 35   | 9.81   |   |
| 7274 | Tmem39a      | 1.05 | 224  | 20.65  | 150  | 21.64  |   |
| 7275 | Cyth1        | 1.05 | 109  | 5.46   | 102  | 5.72   |   |
| 7276 | Fbxo32       | 1.05 | 98   | 5.33   | 66   | 5.58   |   |
| 7277 | Hps6         | 1.05 | 67   | 6.28   | 49   | 6.57   |   |
| 7278 | Mttr14       | 1.05 | 110  | 6.38   | 88   | 6.68   |   |
| 7279 | Tstd2        | 1.05 | 112  | 6.88   | 77   | 7.2    |   |
| 7280 | Spsb4        | 1.05 | 201  | 10.6   | 121  | 11.09  |   |
| 7281 | Nf2          | 1.05 | 519  | 17.66  | 361  | 18.48  |   |
| 7282 | LOC100910122 | 1.05 | 1    | 6.83   | 0    | 7.15   |   |
| 7283 | Vps4a        | 1.05 | 198  | 18.68  | 129  | 19.54  |   |
| 7284 | Dcaf15       | 1.05 | 138  | 13.9   | 103  | 14.55  |   |
| 7285 | Kat7         | 1.05 | 356  | 23.87  | 246  | 24.98  |   |

Supplemental Table 2  
Vehicle versus FSH, 24 hours

|      | A        | B    | C    | D      | E    | F      | G |
|------|----------|------|------|--------|------|--------|---|
| 7286 | Khdrbs3  | 1.05 | 73   | 7.42   | 46   | 7.76   |   |
| 7287 | Mrpl37   | 1.05 | 207  | 22.19  | 175  | 23.22  |   |
| 7288 | Slc2a1   | 1.05 | 248  | 22.3   | 181  | 23.33  |   |
| 7289 | Stim2    | 1.05 | 172  | 9.7    | 147  | 10.14  |   |
| 7290 | Rap2c    | 1.05 | 119  | 8.42   | 85   | 8.8    |   |
| 7291 | Foxj2    | 1.05 | 302  | 13.35  | 211  | 13.96  |   |
| 7292 | Dcaf6    | 1.05 | 281  | 14.11  | 206  | 14.75  |   |
| 7293 | Pxk      | 1.05 | 115  | 5.08   | 83   | 5.31   |   |
| 7294 | Ap1g2    | 1.04 | 37   | 3.12   | 26   | 3.26   |   |
| 7295 | Pnpla2   | 1.04 | 0    | 14.14  | 0    | 14.77  |   |
| 7296 | Zscan12  | 1.04 | 39   | 3.94   | 37   | 4.12   |   |
| 7297 | Ccnb1    | 1.04 | 69   | 9.93   | 48   | 10.37  |   |
| 7298 | Ash2l    | 1.04 | 253  | 20.46  | 187  | 21.37  |   |
| 7299 | Cnot4    | 1.04 | 202  | 7.39   | 154  | 7.71   |   |
| 7300 | Atad3a   | 1.04 | 200  | 15.02  | 130  | 15.68  |   |
| 7301 | Nup155   | 1.04 | 175  | 8.02   | 111  | 8.38   |   |
| 7302 | Mcmbp    | 1.04 | 209  | 18.27  | 153  | 19.07  |   |
| 7303 | Ptges    | 1.04 | 399  | 71.13  | 271  | 74.2   |   |
| 7304 | Zcchc2   | 1.04 | 151  | 3.92   | 103  | 4.09   |   |
| 7305 | Thoc3    | 1.04 | 88   | 10.01  | 68   | 10.44  |   |
| 7306 | Ppp1r8   | 1.04 | 278  | 21.4   | 178  | 22.31  |   |
| 7307 | Uba6     | 1.04 | 748  | 23.11  | 552  | 24.09  |   |
| 7308 | Cpsf2    | 1.04 | 386  | 15.71  | 271  | 16.37  |   |
| 7309 | App      | 1.04 | 1823 | 117.89 | 1316 | 122.9  |   |
| 7310 | Mdm2     | 1.04 | 286  | 19.56  | 198  | 20.39  |   |
| 7311 | Ddx41    | 1.04 | 200  | 28.82  | 153  | 30.04  |   |
| 7312 | Gbbp111  | 1.04 | 122  | 19.13  | 94   | 19.94  |   |
| 7313 | Asxl2    | 1.04 | 169  | 8.93   | 123  | 9.31   |   |
| 7314 | Psm5     | 1.04 | 250  | 22.29  | 170  | 23.23  |   |
| 7315 | Cep135   | 1.04 | 72   | 2.25   | 47   | 2.34   |   |
| 7316 | Mk1      | 1.04 | 111  | 11.31  | 81   | 11.78  |   |
| 7317 | Rybp     | 1.04 | 247  | 12.88  | 178  | 13.41  |   |
| 7318 | Ttll12   | 1.04 | 258  | 24.07  | 178  | 25.07  |   |
| 7319 | Arhgap10 | 1.04 | 137  | 5.71   | 119  | 5.95   |   |
| 7320 | Brpf1    | 1.04 | 213  | 9.62   | 139  | 10.02  |   |
| 7321 | Prdm4    | 1.04 | 158  | 11.12  | 117  | 11.58  |   |
| 7322 | Prrc2a   | 1.04 | 2546 | 93.4   | 1813 | 97.26  |   |
| 7323 | Wdr48    | 1.04 | 269  | 15.56  | 198  | 16.21  |   |
| 7324 | Cnot6    | 1.04 | 392  | 32     | 316  | 33.31  |   |
| 7325 | Mrpl48   | 1.04 | 115  | 12.96  | 95   | 13.49  |   |
| 7326 | Coa3     | 1.04 | 18   | 25.5   | 10   | 26.54  |   |
| 7327 | Klhl20   | 1.04 | 86   | 3.79   | 67   | 3.94   |   |
| 7328 | Pfkl     | 1.04 | 327  | 28.06  | 238  | 29.2   |   |
| 7329 | Atad2b   | 1.04 | 203  | 5.51   | 162  | 5.73   |   |
| 7330 | Ahsa1    | 1.04 | 183  | 31.53  | 127  | 32.8   |   |
| 7331 | Selk     | 1.04 | 92   | 30.33  | 62   | 31.55  |   |
| 7332 | Dpy19l3  | 1.04 | 219  | 5.99   | 149  | 6.23   |   |
| 7333 | Casc4    | 1.04 | 240  | 13.18  | 189  | 13.71  |   |
| 7334 | Ttc21b   | 1.04 | 142  | 6.88   | 120  | 7.15   |   |
| 7335 | Gbf1     | 1.04 | 710  | 21.42  | 498  | 22.27  |   |
| 7336 | Arhgef10 | 1.04 | 141  | 6.17   | 104  | 6.42   |   |
| 7337 | Rps27    | 1.04 | 377  | 348.25 | 271  | 362.07 |   |
| 7338 | Fhod3    | 1.04 | 933  | 35.07  | 764  | 36.45  |   |
| 7339 | Dvl1     | 1.04 | 174  | 13.32  | 118  | 13.85  |   |



Supplemental Table 2  
Vehicle versus FSH, 24 hours

|      | A               | B    | C    | D     | E   | F     | G |
|------|-----------------|------|------|-------|-----|-------|---|
| 7340 | Gcn1l1          | 1.04 | 1207 | 33.04 | 852 | 34.33 |   |
| 7341 | Stat6           | 1.04 | 198  | 16.37 | 113 | 17.01 |   |
| 7342 | Ap2a2           | 1.04 | 920  | 66.36 | 644 | 68.91 |   |
| 7343 | Psmc3           | 1.04 | 592  | 67.08 | 410 | 69.65 |   |
| 7344 | Kdelc2          | 1.04 | 759  | 48.21 | 543 | 50.05 |   |
| 7345 | AC114460.1      | 1.04 | 9    | 2.2   | 6   | 2.29  |   |
| 7346 | E2f6            | 1.04 | 235  | 17.18 | 158 | 17.83 |   |
| 7347 | Hexim2          | 1.04 | 8    | 1.2   | 8   | 1.25  |   |
| 7348 | Intu            | 1.04 | 12   | 0.62  | 13  | 0.64  |   |
| 7349 | Lama2           | 1.04 | 27   | 0.37  | 32  | 0.38  |   |
| 7350 | Nif3l1          | 1.04 | 94   | 6.08  | 67  | 6.31  |   |
| 7351 | Rsg1            | 1.04 | 9    | 0.46  | 6   | 0.48  |   |
| 7352 | Sh3yl1          | 1.04 | 23   | 1.26  | 24  | 1.31  |   |
| 7353 | SNORD77_1       | 1.04 | 0    | 22.65 | 0   | 23.51 |   |
| 7354 | Tmem120b        | 1.04 | 25   | 2.18  | 15  | 2.26  |   |
| 7355 | Ubxn1           | 1.04 | 270  | 62.23 | 198 | 64.59 |   |
| 7356 | Acbd6           | 1.04 | 116  | 8.28  | 84  | 8.59  |   |
| 7357 | Adamts9         | 1.04 | 11   | 0.22  | 11  | 0.23  |   |
| 7358 | Blzf1           | 1.04 | 65   | 6.07  | 44  | 6.31  |   |
| 7359 | Dcun1d1         | 1.04 | 152  | 3.28  | 106 | 3.41  |   |
| 7360 | Elmo3           | 1.04 | 30   | 2.18  | 25  | 2.26  |   |
| 7361 | ENSRNOG00000060 | 1.04 | 75   | 1.41  | 68  | 1.46  |   |
| 7362 | Ercc8           | 1.04 | 74   | 4.84  | 48  | 5.03  |   |
| 7363 | Hat1            | 1.04 | 141  | 14.91 | 94  | 15.47 |   |
| 7364 | Irf2bp2         | 1.04 | 111  | 15.25 | 82  | 15.82 |   |
| 7365 | Krt10           | 1.04 | 18   | 1.6   | 14  | 1.67  |   |
| 7366 | LOC688684       | 1.04 | 0    | 4.54  | 0   | 4.71  |   |
| 7367 | Lrrc16a         | 1.04 | 229  | 6.88  | 191 | 7.15  |   |
| 7368 | Mmgt1           | 1.04 | 113  | 6.77  | 80  | 7.03  |   |
| 7369 | Mtpap           | 1.04 | 86   | 5.21  | 56  | 5.4   |   |
| 7370 | Ndufc2          | 1.04 | 83   | 31.15 | 64  | 32.33 |   |
| 7371 | Nploc4          | 1.04 | 589  | 29.35 | 430 | 30.46 |   |
| 7372 | Nr1i3           | 1.04 | 43   | 2.09  | 21  | 2.17  |   |
| 7373 | Pcdhb10         | 1.04 | 7    | 0.38  | 5   | 0.4   |   |
| 7374 | Pgs1            | 1.04 | 172  | 13.13 | 117 | 13.63 |   |
| 7375 | Polq            | 1.04 | 27   | 0.61  | 20  | 0.64  |   |
| 7376 | Rbm11           | 1.04 | 8    | 0.94  | 6   | 0.98  |   |
| 7377 | Rbm12_2         | 1.04 | 0    | 0.56  | 0   | 0.58  |   |
| 7378 | RGD1562608      | 1.04 | 66   | 0.92  | 62  | 0.96  |   |
| 7379 | RGD1566239      | 1.04 | 27   | 8.84  | 29  | 9.17  |   |
| 7380 | Riok1           | 1.04 | 122  | 8.22  | 80  | 8.54  |   |
| 7381 | Rn60_X_0691.2   | 1.04 | 14   | 4.27  | 10  | 4.44  |   |
| 7382 | Rpp25l          | 1.04 | 22   | 6.88  | 16  | 7.15  |   |
| 7383 | Serping1        | 1.04 | 14   | 1.85  | 12  | 1.92  |   |
| 7384 | Slc35e4         | 1.04 | 96   | 5.46  | 62  | 5.67  |   |
| 7385 | Snx30           | 1.04 | 61   | 3.3   | 54  | 3.42  |   |
| 7386 | Tbc1d4          | 1.04 | 46   | 1.78  | 40  | 1.84  |   |
| 7387 | Thap1           | 1.04 | 34   | 7.03  | 34  | 7.29  |   |
| 7388 | Tmeff1          | 1.04 | 19   | 0.7   | 9   | 0.73  |   |
| 7389 | Trmt5           | 1.04 | 50   | 4.12  | 39  | 4.27  |   |
| 7390 | Zbtb42          | 1.04 | 22   | 3.07  | 15  | 3.19  |   |
| 7391 | Zc3h12a         | 1.04 | 34   | 2.45  | 21  | 2.54  |   |
| 7392 | Zfp566          | 1.04 | 47   | 3.1   | 24  | 3.21  |   |
| 7393 | Zfp872          | 1.04 | 12   | 1.25  | 12  | 1.3   |   |

Supplemental Table 2  
Vehicle versus FSH, 24 hours

|      | A              | B    | C    | D      | E    | F      | G |
|------|----------------|------|------|--------|------|--------|---|
| 7394 | Zmynd10        | 1.04 | 12   | 1.01   | 5    | 1.05   |   |
| 7395 | Zfp112         | 1.04 | 14   | 1.06   | 11   | 1.1    |   |
| 7396 | LOC100911485   | 1.04 | 151  | 19.93  | 102  | 20.67  |   |
| 7397 | Sin3b          | 1.04 | 332  | 70.25  | 237  | 72.87  |   |
| 7398 | Csnk2b         | 1.04 | 300  | 40.75  | 214  | 42.27  |   |
| 7399 | Gnb2l1_1       | 1.04 | 1563 | 221.84 | 1146 | 230.1  |   |
| 7400 | Pdgfc          | 1.04 | 297  | 22.11  | 210  | 22.93  |   |
| 7401 | Osbp           | 1.04 | 407  | 21.32  | 292  | 22.1   |   |
| 7402 | Rbbp7          | 1.04 | 956  | 117.97 | 666  | 122.26 |   |
| 7403 | Gnpat          | 1.04 | 133  | 11.85  | 100  | 12.28  |   |
| 7404 | Thoc2          | 1.04 | 287  | 11.23  | 196  | 11.64  |   |
| 7405 | Naa30          | 1.04 | 144  | 5.97   | 110  | 6.18   |   |
| 7406 | Vps37b         | 1.04 | 150  | 8.6    | 88   | 8.91   |   |
| 7407 | Parp4          | 1.04 | 226  | 11.04  | 164  | 11.43  |   |
| 7408 | CommD9         | 1.04 | 112  | 17.07  | 82   | 17.67  |   |
| 7409 | Ddhd2          | 1.04 | 108  | 8.44   | 97   | 8.74   |   |
| 7410 | Rap1a          | 1.04 | 105  | 8.51   | 66   | 8.82   |   |
| 7411 | Eif1b          | 1.03 | 74   | 17.84  | 49   | 18.46  |   |
| 7412 | Srbd1          | 1.03 | 106  | 4.82   | 88   | 4.98   |   |
| 7413 | Irs1           | 1.03 | 751  | 27.32  | 532  | 28.27  |   |
| 7414 | Nipa2          | 1.03 | 176  | 10.89  | 117  | 11.27  |   |
| 7415 | Avl9           | 1.03 | 85   | 6.17   | 55   | 6.38   |   |
| 7416 | Ets2           | 1.03 | 69   | 4.07   | 46   | 4.21   |   |
| 7417 | Snopc2         | 1.03 | 63   | 8.62   | 42   | 8.92   |   |
| 7418 | Wdr45          | 1.03 | 79   | 7.61   | 51   | 7.87   |   |
| 7419 | Champ1         | 1.03 | 172  | 10.65  | 134  | 11.02  |   |
| 7420 | Nufip2         | 1.03 | 189  | 20.4   | 111  | 21.1   |   |
| 7421 | Nfrkb          | 1.03 | 325  | 12.11  | 224  | 12.53  |   |
| 7422 | Klhl8          | 1.03 | 66   | 3.9    | 51   | 4.03   |   |
| 7423 | I7Rn6          | 1.03 | 60   | 8.34   | 48   | 8.63   |   |
| 7424 | Cnot11         | 1.03 | 111  | 12.78  | 79   | 13.21  |   |
| 7425 | AABR07051787.1 | 1.03 | 35   | 3.57   | 26   | 3.69   |   |
| 7426 | Rad23a         | 1.03 | 206  | 27.89  | 152  | 28.82  |   |
| 7427 | Bod111         | 1.03 | 444  | 10.87  | 324  | 11.23  |   |
| 7428 | Gtf3c3         | 1.03 | 162  | 4.81   | 127  | 4.96   |   |
| 7429 | Lgals8         | 1.03 | 50   | 12.05  | 34   | 12.45  |   |
| 7430 | Snmp200        | 1.03 | 1367 | 49.12  | 957  | 50.72  |   |
| 7431 | Tmem51         | 1.03 | 66   | 4.35   | 48   | 4.49   |   |
| 7432 | Meis3          | 1.03 | 43   | 4.81   | 29   | 4.97   |   |
| 7433 | Ski            | 1.03 | 326  | 25.6   | 212  | 26.42  |   |
| 7434 | Bod1           | 1.03 | 95   | 11.78  | 63   | 12.16  |   |
| 7435 | Cyth2          | 1.03 | 236  | 31.58  | 155  | 32.58  |   |
| 7436 | Pcdhgb8        | 1.03 | 32   | 3.19   | 22   | 3.29   |   |
| 7437 | Kpna5          | 1.03 | 108  | 4.06   | 72   | 4.19   |   |
| 7438 | Tinf2          | 1.03 | 34   | 4.67   | 26   | 4.81   |   |
| 7439 | Lmf2           | 1.03 | 235  | 20.84  | 162  | 21.48  |   |
| 7440 | Mdc1           | 1.03 | 167  | 7.55   | 121  | 7.78   |   |
| 7441 | Ube2g1         | 1.03 | 210  | 18.06  | 167  | 18.62  |   |
| 7442 | Plekhg3        | 1.03 | 186  | 7.84   | 116  | 8.08   |   |
| 7443 | Aldh7a1        | 1.03 | 336  | 39.34  | 244  | 40.53  |   |
| 7444 | Pacs2          | 1.03 | 300  | 16.78  | 216  | 17.28  |   |
| 7445 | H2afz          | 1.03 | 64   | 149.24 | 39   | 153.69 |   |
| 7446 | Ubr7           | 1.03 | 182  | 10.33  | 122  | 10.63  |   |
| 7447 | AC094212.1     | 1.03 | 0    | 5.83   | 0    | 6.01   |   |

Supplemental Table 2  
Vehicle versus FSH, 24 hours

|      | A              | B    | C   | D      | E   | F      | G |
|------|----------------|------|-----|--------|-----|--------|---|
| 7448 | AC136013.2     | 1.03 | 32  | 7.51   | 28  | 7.73   |   |
| 7449 | Gpatch1        | 1.03 | 58  | 1.94   | 34  | 2      |   |
| 7450 | Lin9           | 1.03 | 19  | 3.57   | 20  | 3.67   |   |
| 7451 | LOC288913      | 1.03 | 105 | 36.24  | 69  | 37.3   |   |
| 7452 | Lrrc71         | 1.03 | 48  | 2.77   | 33  | 2.85   |   |
| 7453 | Racgap1        | 1.03 | 76  | 6.1    | 55  | 6.28   |   |
| 7454 | Tradd          | 1.03 | 21  | 4.49   | 17  | 4.62   |   |
| 7455 | LOC100911248   | 1.03 | 86  | 16.13  | 70  | 16.6   |   |
| 7456 | AC115322.4     | 1.03 | 122 | 284.62 | 118 | 292.89 |   |
| 7457 | Shprh          | 1.03 | 266 | 7.44   | 198 | 7.66   |   |
| 7458 | Zfp462         | 1.03 | 354 | 8.64   | 244 | 8.89   |   |
| 7459 | Timm50         | 1.03 | 119 | 24.19  | 87  | 24.88  |   |
| 7460 | Rpl5           | 1.03 | 888 | 339.14 | 630 | 348.86 |   |
| 7461 | Slc39a6        | 1.03 | 324 | 21.9   | 224 | 22.52  |   |
| 7462 | Lsm8           | 1.03 | 76  | 20.32  | 61  | 20.9   |   |
| 7463 | Mat2a          | 1.03 | 582 | 48.4   | 409 | 49.78  |   |
| 7464 | Zfp771         | 1.03 | 111 | 16.98  | 90  | 17.46  |   |
| 7465 | Kctd18         | 1.03 | 155 | 5.19   | 121 | 5.34   |   |
| 7466 | Tsen15         | 1.03 | 53  | 9.02   | 32  | 9.27   |   |
| 7467 | Dnaja1         | 1.03 | 542 | 77.69  | 345 | 79.84  |   |
| 7468 | Ttpal          | 1.03 | 168 | 7.53   | 110 | 7.74   |   |
| 7469 | Inpp5b         | 1.03 | 64  | 7.59   | 57  | 7.79   |   |
| 7470 | Cops7a         | 1.03 | 293 | 29.06  | 193 | 29.85  |   |
| 7471 | Sumo1          | 1.03 | 233 | 42.64  | 173 | 43.8   |   |
| 7472 | Gltf           | 1.03 | 101 | 13.9   | 66  | 14.27  |   |
| 7473 | Pikfyve        | 1.03 | 279 | 6.27   | 194 | 6.44   |   |
| 7474 | Gtf2h1         | 1.03 | 189 | 11.49  | 129 | 11.79  |   |
| 7475 | Tnk2           | 1.03 | 381 | 15.65  | 256 | 16.06  |   |
| 7476 | Ttc3           | 1.03 | 959 | 25.98  | 625 | 26.66  |   |
| 7477 | Btbd6          | 1.03 | 9   | 1.99   | 10  | 2.04   |   |
| 7478 | Casc5          | 1.03 | 28  | 1.05   | 25  | 1.07   |   |
| 7479 | Cc2d1a         | 1.03 | 173 | 11.22  | 120 | 11.5   |   |
| 7480 | Mrpl53_2       | 1.03 | 10  | 13.8   | 4   | 14.15  |   |
| 7481 | Sdccag8        | 1.03 | 377 | 3.07   | 182 | 3.15   |   |
| 7482 | Socs4          | 1.03 | 75  | 8.45   | 56  | 8.67   |   |
| 7483 | AABR07069227.1 | 1.03 | 18  | 2.87   | 13  | 2.95   |   |
| 7484 | Efhd2          | 1.03 | 181 | 20.1   | 125 | 20.62  |   |
| 7485 | Fam53c         | 1.03 | 183 | 13.62  | 112 | 13.97  |   |
| 7486 | Gen1           | 1.03 | 23  | 0.99   | 13  | 1.01   |   |
| 7487 | Map3k2         | 1.03 | 111 | 5.77   | 85  | 5.92   |   |
| 7488 | Nob1           | 1.03 | 266 | 33.24  | 181 | 34.1   |   |
| 7489 | Pdzk1          | 1.03 | 122 | 2.14   | 101 | 2.19   |   |
| 7490 | Ankfy1         | 1.03 | 673 | 20.4   | 493 | 20.92  |   |
| 7491 | Zc3h14         | 1.03 | 330 | 16.91  | 231 | 17.34  |   |
| 7492 | Ormdl3         | 1.03 | 250 | 106    | 172 | 108.69 |   |
| 7493 | Pafah1b1       | 1.03 | 807 | 40.15  | 618 | 41.16  |   |
| 7494 | Slc37a3        | 1.03 | 294 | 21.92  | 208 | 22.47  |   |
| 7495 | Ubxn4          | 1.02 | 532 | 32.3   | 380 | 33.1   |   |
| 7496 | Uqcr10_1       | 1.02 | 171 | 105.14 | 121 | 107.74 |   |
| 7497 | Atxn7l3        | 1.02 | 83  | 14.96  | 58  | 15.33  |   |
| 7498 | Atf2           | 1.02 | 193 | 18.69  | 144 | 19.15  |   |
| 7499 | Spcs2          | 1.02 | 308 | 23.43  | 202 | 24.01  |   |
| 7500 | Cep104         | 1.02 | 215 | 10.18  | 156 | 10.43  |   |
| 7501 | Mrps23         | 1.02 | 69  | 11.75  | 58  | 12.03  |   |

Supplemental Table 2  
Vehicle versus FSH, 24 hours

|      | A              | B    | C    | D      | E   | F      | G |
|------|----------------|------|------|--------|-----|--------|---|
| 7502 | Tspyl2         | 1.02 | 131  | 10.73  | 88  | 11     |   |
| 7503 | Ube2z          | 1.02 | 398  | 32.19  | 273 | 32.96  |   |
| 7504 | Tnfrsf21       | 1.02 | 49   | 2.52   | 35  | 2.58   |   |
| 7505 | Slc17a5        | 1.02 | 65   | 3.73   | 43  | 3.82   |   |
| 7506 | Snw1           | 1.02 | 129  | 15.59  | 102 | 15.96  |   |
| 7507 | Ppp4r1         | 1.02 | 554  | 32.51  | 400 | 33.26  |   |
| 7508 | Stxbp5         | 1.02 | 248  | 4.46   | 184 | 4.56   |   |
| 7509 | Wdr5           | 1.02 | 204  | 20.92  | 149 | 21.4   |   |
| 7510 | Akna           | 1.02 | 34   | 1.26   | 28  | 1.29   |   |
| 7511 | Opa3           | 1.02 | 119  | 9.73   | 101 | 9.95   |   |
| 7512 | Abcg3l1        | 1.02 | 121  | 4.67   | 74  | 4.77   |   |
| 7513 | Hr             | 1.02 | 29   | 1.11   | 20  | 1.14   |   |
| 7514 | Kdsr           | 1.02 | 96   | 6.26   | 66  | 6.4    |   |
| 7515 | Ndc1           | 1.02 | 140  | 5.59   | 92  | 5.71   |   |
| 7516 | Rnaseh2c       | 1.02 | 29   | 9.23   | 20  | 9.44   |   |
| 7517 | Dctn2          | 1.02 | 621  | 70.76  | 443 | 72.34  |   |
| 7518 | Grn            | 1.02 | 961  | 101.48 | 671 | 103.74 |   |
| 7519 | Bmpr1a         | 1.02 | 292  | 22.95  | 217 | 23.46  |   |
| 7520 | Birc6          | 1.02 | 816  | 15.54  | 584 | 15.87  |   |
| 7521 | Mrpl55         | 1.02 | 48   | 9.76   | 35  | 9.96   |   |
| 7522 | Nuf2           | 1.02 | 47   | 4.88   | 32  | 4.98   |   |
| 7523 | RGD1563888     | 1.02 | 78   | 5.07   | 43  | 5.18   |   |
| 7524 | Tti2           | 1.02 | 47   | 4.8    | 34  | 4.9    |   |
| 7525 | Fbxl19         | 1.02 | 109  | 7      | 67  | 7.14   |   |
| 7526 | Fkbp8          | 1.02 | 420  | 59.31  | 299 | 60.53  |   |
| 7527 | Spcs3          | 1.02 | 317  | 22.53  | 219 | 22.99  |   |
| 7528 | LOC100910717   | 1.02 | 744  | 24.7   | 515 | 25.2   |   |
| 7529 | Rcl1           | 1.02 | 61   | 4.7    | 39  | 4.79   |   |
| 7530 | Hsph1          | 1.02 | 373  | 24.51  | 260 | 25.01  |   |
| 7531 | Psemb4         | 1.02 | 457  | 126.51 | 316 | 129.03 |   |
| 7532 | Gskip          | 1.02 | 96   | 6.61   | 70  | 6.74   |   |
| 7533 | Ndufa2         | 1.02 | 59   | 25.36  | 40  | 25.86  |   |
| 7534 | Rab5b          | 1.02 | 505  | 35.73  | 358 | 36.43  |   |
| 7535 | RGD1307752     | 1.02 | 217  | 46.7   | 147 | 47.61  |   |
| 7536 | Sec31a         | 1.02 | 941  | 47.12  | 651 | 48.03  |   |
| 7537 | Syng2          | 1.02 | 141  | 35.29  | 95  | 35.98  |   |
| 7538 | Vcpip1         | 1.02 | 230  | 12.6   | 171 | 12.84  |   |
| 7539 | Nipbl          | 1.02 | 538  | 14.6   | 409 | 14.88  |   |
| 7540 | Gzf1           | 1.02 | 123  | 6.23   | 86  | 6.35   |   |
| 7541 | Polr2d         | 1.02 | 110  | 23.91  | 85  | 24.35  |   |
| 7542 | Tor1b          | 1.02 | 157  | 9.12   | 94  | 9.29   |   |
| 7543 | Yif1a          | 1.02 | 111  | 18.53  | 89  | 18.87  |   |
| 7544 | Slc33a1        | 1.02 | 159  | 9.38   | 108 | 9.55   |   |
| 7545 | Pdia3          | 1.02 | 1185 | 273.01 | 776 | 277.95 |   |
| 7546 | Wdr26          | 1.02 | 757  | 28.28  | 528 | 28.78  |   |
| 7547 | AABR07035074.1 | 1.02 | 12   | 1.29   | 10  | 1.32   |   |
| 7548 | AABR07040622.1 | 1.02 | 7    | 2.83   | 5   | 2.87   |   |
| 7549 | AABR07063082.1 | 1.02 | 7    | 1.59   | 6   | 1.62   |   |
| 7550 | Arid4b         | 1.02 | 0    | 0.68   | 0   | 0.69   |   |
| 7551 | Bbs4           | 1.02 | 108  | 6.95   | 93  | 7.07   |   |
| 7552 | Clip3_2        | 1.02 | 2    | 0.7    | 4   | 0.71   |   |
| 7553 | Dfna5          | 1.02 | 39   | 1.61   | 16  | 1.64   |   |
| 7554 | Efcab7         | 1.02 | 19   | 1.16   | 27  | 1.18   |   |
| 7555 | Gabra4         | 1.02 | 16   | 0.56   | 9   | 0.57   |   |

Supplemental Table 2  
Vehicle versus FSH, 24 hours

|      | A              | B    | C    | D     | E   | F     | G |
|------|----------------|------|------|-------|-----|-------|---|
| 7556 | Gxylt1         | 1.02 | 343  | 10.6  | 231 | 10.78 |   |
| 7557 | Pde10a         | 1.02 | 218  | 8.28  | 205 | 8.42  |   |
| 7558 | Pkd11l1        | 1.02 | 17   | 0.32  | 11  | 0.32  |   |
| 7559 | Pop1           | 1.02 | 47   | 2.84  | 35  | 2.89  |   |
| 7560 | Qsox1          | 1.02 | 198  | 12.95 | 143 | 13.17 |   |
| 7561 | Sf3a3          | 1.02 | 202  | 16.46 | 150 | 16.75 |   |
| 7562 | Ska1           | 1.02 | 25   | 1.38  | 14  | 1.41  |   |
| 7563 | Skap2          | 1.02 | 34   | 3.06  | 23  | 3.11  |   |
| 7564 | Srxn1          | 1.02 | 63   | 3.4   | 50  | 3.46  |   |
| 7565 | Tatdn1         | 1.02 | 64   | 2.83  | 45  | 2.87  |   |
| 7566 | Tbl3           | 1.02 | 161  | 15.51 | 114 | 15.78 |   |
| 7567 | Tfb1m          | 1.02 | 53   | 3.14  | 26  | 3.2   |   |
| 7568 | Ubl4a          | 1.02 | 120  | 12.82 | 85  | 13.04 |   |
| 7569 | Ubt1           | 1.02 | 34   | 2.69  | 26  | 2.73  |   |
| 7570 | Ust            | 1.02 | 39   | 1.22  | 39  | 1.24  |   |
| 7571 | Uxt            | 1.02 | 61   | 23.73 | 43  | 24.14 |   |
| 7572 | Zfp191         | 1.02 | 128  | 20.38 | 88  | 20.73 |   |
| 7573 | Tnfrsf1a       | 1.02 | 270  | 30.68 | 188 | 31.19 |   |
| 7574 | Arhgef7        | 1.02 | 281  | 11.65 | 211 | 11.84 |   |
| 7575 | Fam60a_1       | 1.02 | 97   | 11.32 | 68  | 11.5  |   |
| 7576 | LOC100360260_1 | 1.02 | 173  | 49.8  | 125 | 50.6  |   |
| 7577 | Ndr1           | 1.02 | 231  | 27.12 | 160 | 27.56 |   |
| 7578 | Nsmaf          | 1.02 | 168  | 9.03  | 133 | 9.17  |   |
| 7579 | RGD1311899     | 1.02 | 122  | 19.91 | 87  | 20.23 |   |
| 7580 | Micu1          | 1.02 | 241  | 19.86 | 180 | 20.17 |   |
| 7581 | Itpkb          | 1.02 | 134  | 5.89  | 97  | 5.98  |   |
| 7582 | Anks6          | 1.02 | 125  | 3.3   | 79  | 3.35  |   |
| 7583 | Dclre1b        | 1.02 | 98   | 5.19  | 72  | 5.27  |   |
| 7584 | Supt16h        | 1.02 | 373  | 21.1  | 258 | 21.42 |   |
| 7585 | Sec16a         | 1.02 | 868  | 22.42 | 601 | 22.77 |   |
| 7586 | Dvl3           | 1.02 | 507  | 25.77 | 352 | 26.17 |   |
| 7587 | Cbx5           | 1.02 | 81   | 12.37 | 63  | 12.55 |   |
| 7588 | Kctd20         | 1.02 | 93   | 14.47 | 68  | 14.69 |   |
| 7589 | Mapk1          | 1.01 | 461  | 42.69 | 294 | 43.32 |   |
| 7590 | Narf           | 1.01 | 126  | 10.35 | 86  | 10.51 |   |
| 7591 | Xrn2           | 1.01 | 418  | 24.76 | 281 | 25.12 |   |
| 7592 | Rfc1           | 1.01 | 257  | 11.71 | 175 | 11.88 |   |
| 7593 | Arl6ip6        | 1.01 | 89   | 7.71  | 68  | 7.83  |   |
| 7594 | Dtnbp1         | 1.01 | 140  | 12.47 | 123 | 12.65 |   |
| 7595 | LOC100911959   | 1.01 | 800  | 57.69 | 570 | 58.52 |   |
| 7596 | Zfp653         | 1.01 | 75   | 6.13  | 59  | 6.22  |   |
| 7597 | Smg5           | 1.01 | 397  | 20.44 | 286 | 20.73 |   |
| 7598 | Cnot1          | 1.01 | 1102 | 32.4  | 776 | 32.86 |   |
| 7599 | Smim14         | 1.01 | 206  | 33.08 | 132 | 33.54 |   |
| 7600 | Tfeb           | 1.01 | 47   | 4.54  | 31  | 4.61  |   |
| 7601 | Usp19          | 1.01 | 544  | 26.75 | 373 | 27.11 |   |
| 7602 | LOC100909609   | 1.01 | 439  | 13.13 | 370 | 13.31 |   |
| 7603 | Zc3h3          | 1.01 | 182  | 8.84  | 137 | 8.96  |   |
| 7604 | Flii           | 1.01 | 591  | 36.02 | 417 | 36.5  |   |
| 7605 | Abr            | 1.01 | 141  | 8.42  | 94  | 8.53  |   |
| 7606 | Snap29         | 1.01 | 215  | 12.16 | 139 | 12.31 |   |
| 7607 | Zmynd11        | 1.01 | 443  | 21.2  | 314 | 21.46 |   |
| 7608 | Gabbr1         | 1.01 | 314  | 12.32 | 210 | 12.47 |   |
| 7609 | Asb6           | 1.01 | 96   | 10.25 | 68  | 10.38 |   |

Supplemental Table 2  
Vehicle versus FSH, 24 hours

|      | A            | B    | C    | D      | E    | F      | G |
|------|--------------|------|------|--------|------|--------|---|
| 7610 | Rab22a       | 1.01 | 320  | 8.29   | 186  | 8.39   |   |
| 7611 | Cttn_2       | 1.01 | 0    | 18.76  | 0    | 18.99  |   |
| 7612 | Pxn          | 1.01 | 192  | 11.23  | 144  | 11.36  |   |
| 7613 | Rpl7         | 1.01 | 1605 | 83.88  | 1049 | 84.84  |   |
| 7614 | Usp36        | 1.01 | 314  | 8.95   | 198  | 9.05   |   |
| 7615 | Vcp          | 1.01 | 1894 | 146.11 | 1312 | 147.71 |   |
| 7616 | Cenph        | 1.01 | 41   | 4.56   | 24   | 4.61   |   |
| 7617 | Exosc5       | 1.01 | 25   | 5.59   | 19   | 5.65   |   |
| 7618 | Frs3         | 1.01 | 30   | 2.84   | 24   | 2.87   |   |
| 7619 | Mpc2         | 1.01 | 75   | 29.85  | 53   | 30.17  |   |
| 7620 | Ptgr2        | 1.01 | 157  | 9.53   | 119  | 9.64   |   |
| 7621 | Rhbdd1       | 1.01 | 171  | 8.76   | 111  | 8.86   |   |
| 7622 | Zfp518a      | 1.01 | 48   | 1.69   | 39   | 1.71   |   |
| 7623 | Dnajc10      | 1.01 | 495  | 28.46  | 339  | 28.77  |   |
| 7624 | Kdm4c        | 1.01 | 151  | 6.34   | 116  | 6.4    |   |
| 7625 | Prkaa1       | 1.01 | 231  | 11.19  | 162  | 11.31  |   |
| 7626 | Gabpb1       | 1.01 | 218  | 16.37  | 183  | 16.54  |   |
| 7627 | Ing5         | 1.01 | 191  | 8.7    | 129  | 8.79   |   |
| 7628 | Mlec         | 1.01 | 1474 | 25.54  | 1127 | 25.79  |   |
| 7629 | Fam216a      | 1.01 | 78   | 11.87  | 52   | 11.99  |   |
| 7630 | Rpl7l1       | 1.01 | 125  | 39.68  | 82   | 40.07  |   |
| 7631 | Dhx36        | 1.01 | 268  | 9.37   | 189  | 9.46   |   |
| 7632 | Zfp609       | 1.01 | 496  | 11.2   | 334  | 11.31  |   |
| 7633 | LOC100911615 | 1.01 | 0    | 16     | 0    | 16.14  |   |
| 7634 | Npepl1       | 1.01 | 252  | 28.6   | 176  | 28.86  |   |
| 7635 | Rnf139       | 1.01 | 82   | 6.59   | 58   | 6.65   |   |
| 7636 | Sys1         | 1.01 | 38   | 9.06   | 25   | 9.14   |   |
| 7637 | Agk          | 1.01 | 58   | 4.89   | 37   | 4.93   |   |
| 7638 | Senp3        | 1.01 | 261  | 25.06  | 186  | 25.28  |   |
| 7639 | Cherp        | 1.01 | 402  | 23.55  | 273  | 23.76  |   |
| 7640 | Lamp1        | 1.01 | 1197 | 145.29 | 819  | 146.57 |   |
| 7641 | Dnm2         | 1.01 | 481  | 24.2   | 338  | 24.42  |   |
| 7642 | Snx5         | 1.01 | 202  | 14.39  | 121  | 14.52  |   |
| 7643 | Tufm         | 1.01 | 251  | 32.01  | 170  | 32.29  |   |
| 7644 | Ncor1        | 1.01 | 1050 | 26.88  | 743  | 27.11  |   |
| 7645 | Dnajc13      | 1.01 | 490  | 14.14  | 365  | 14.27  |   |
| 7646 | Cirh1a       | 1.01 | 238  | 24.13  | 165  | 24.34  |   |
| 7647 | Eef1g        | 1.01 | 1985 | 393.49 | 1304 | 396.85 |   |
| 7648 | Pum1         | 1.01 | 755  | 27.78  | 552  | 28.01  |   |
| 7649 | Nucb1        | 1.01 | 221  | 55.15  | 119  | 55.61  |   |
| 7650 | Aqr          | 1.01 | 422  | 19.76  | 293  | 19.92  |   |
| 7651 | Slc25a3      | 1.01 | 698  | 106.14 | 474  | 106.98 |   |
| 7652 | Taf1         | 1.01 | 176  | 7.86   | 121  | 7.92   |   |
| 7653 | Ankrd17      | 1.01 | 843  | 17.82  | 609  | 17.96  |   |
| 7654 | Rfx1         | 1.01 | 187  | 8.21   | 125  | 8.28   |   |
| 7655 | Bet1         | 1.01 | 93   | 12.33  | 60   | 12.42  |   |
| 7656 | Mtrr         | 1.01 | 95   | 6.35   | 72   | 6.4    |   |
| 7657 | Alg10        | 1.01 | 166  | 17.11  | 112  | 17.23  |   |
| 7658 | Foxl2        | 1.01 | 162  | 36.1   | 112  | 36.37  |   |
| 7659 | Wdr18        | 1.01 | 57   | 15.83  | 44   | 15.95  |   |
| 7660 | Zfp467       | 1.01 | 110  | 5.92   | 77   | 5.96   |   |
| 7661 | Atg4b        | 1.01 | 142  | 17.27  | 120  | 17.4   |   |
| 7662 | Sf3b4        | 1.01 | 364  | 55.59  | 247  | 55.98  |   |
| 7663 | Atxn1l       | 1.01 | 127  | 13.23  | 87   | 13.33  |   |

Supplemental Table 2  
Vehicle versus FSH, 24 hours

|      | A            | B    | C    | D      | E    | F      | G |
|------|--------------|------|------|--------|------|--------|---|
| 7664 | Mrps2        | 1.01 | 157  | 8.46   | 100  | 8.51   |   |
| 7665 | Slc6a6       | 1.01 | 171  | 12.8   | 129  | 12.89  |   |
| 7666 | Ipo8         | 1.01 | 158  | 12.04  | 108  | 12.12  |   |
| 7667 | Sf3a1        | 1.01 | 399  | 19.06  | 282  | 19.19  |   |
| 7668 | Pum2         | 1.01 | 985  | 34.48  | 715  | 34.71  |   |
| 7669 | Hint1-ps1    | 1.01 | 190  | 92.06  | 125  | 92.67  |   |
| 7670 | Vdac1        | 1.01 | 428  | 87.35  | 302  | 87.9   |   |
| 7671 | Adar         | 1.01 | 187  | 8.98   | 137  | 9.03   |   |
| 7672 | Asb3         | 1.01 | 76   | 4.96   | 50   | 4.99   |   |
| 7673 | Coq5         | 1.01 | 70   | 6.23   | 52   | 6.27   |   |
| 7674 | Dhx32        | 1.01 | 85   | 6.08   | 63   | 6.12   |   |
| 7675 | Gpatch2l     | 1.01 | 90   | 5.4    | 79   | 5.43   |   |
| 7676 | Gse1         | 1.01 | 70   | 2.92   | 67   | 2.94   |   |
| 7677 | Hspa2        | 1.01 | 41   | 3.89   | 30   | 3.91   |   |
| 7678 | Kank3        | 1.01 | 16   | 1.2    | 12   | 1.21   |   |
| 7679 | Mfsd2a       | 1.01 | 21   | 1.52   | 15   | 1.53   |   |
| 7680 | Raver2       | 1.01 | 90   | 6.61   | 67   | 6.64   |   |
| 7681 | Setd6        | 1.01 | 49   | 5.77   | 29   | 5.81   |   |
| 7682 | Thoc1_1      | 1.01 | 96   | 17.28  | 66   | 17.38  |   |
| 7683 | Tnfsf12      | 1.01 | 21   | 2.11   | 9    | 2.12   |   |
| 7684 | Ttc37        | 1.01 | 160  | 7.33   | 115  | 7.38   |   |
| 7685 | Uap1         | 1.01 | 125  | 12.96  | 90   | 13.04  |   |
| 7686 | RGD1311703   | 1.01 | 283  | 41.81  | 197  | 42.06  |   |
| 7687 | Sdhaf4       | 1.01 | 25   | 10.28  | 16   | 10.34  |   |
| 7688 | Cdc16        | 1.01 | 414  | 32.18  | 292  | 32.36  |   |
| 7689 | St3gal1      | 1.01 | 2024 | 84.02  | 1422 | 84.49  |   |
| 7690 | LOC100911993 | 1.01 | 185  | 6.14   | 157  | 6.17   |   |
| 7691 | Ranbp10      | 1    | 250  | 8.26   | 178  | 8.3    |   |
| 7692 | Trmt2a       | 1    | 95   | 8.42   | 64   | 8.46   |   |
| 7693 | Sdc3         | 1    | 590  | 29.49  | 401  | 29.62  |   |
| 7694 | Rps15        | 1    | 578  | 314.17 | 417  | 315.5  |   |
| 7695 | Adam10       | 1    | 449  | 27.91  | 306  | 28.03  |   |
| 7696 | LOC100910121 | 1    | 330  | 21.52  | 240  | 21.61  |   |
| 7697 | *March5      | 1    | 187  | 22.27  | 119  | 22.35  |   |
| 7698 | Abcb7        | 1    | 53   | 4.4    | 43   | 4.41   |   |
| 7699 | Dgkz         | 1    | 152  | 8.49   | 96   | 8.52   |   |
| 7700 | Dars         | 1    | 274  | 17.44  | 157  | 17.5   |   |
| 7701 | Ptprm        | 1    | 617  | 14.43  | 418  | 14.47  |   |
| 7702 | Nampt        | 1    | 128  | 10.48  | 88   | 10.51  |   |
| 7703 | Kctd17       | 1    | 135  | 10.83  | 118  | 10.86  |   |
| 7704 | Pdzd11       | 1    | 72   | 8.58   | 49   | 8.6    |   |
| 7705 | Slc12a4      | 1    | 866  | 47.71  | 571  | 47.84  |   |
| 7706 | Nub1         | 1    | 214  | 25.34  | 152  | 25.4   |   |
| 7707 | Myl12b       | 1    | 808  | 105.77 | 352  | 106.01 |   |
| 7708 | Unk          | 1    | 143  | 8.07   | 91   | 8.08   |   |
| 7709 | Commd4       | 1    | 83   | 14.48  | 72   | 14.51  |   |
| 7710 | Gabarapl2    | 1    | 158  | 31.77  | 118  | 31.84  |   |
| 7711 | LOC103689943 | 1    | 1    | 9.38   | 0    | 9.4    |   |
| 7712 | Utp3         | 1    | 87   | 13.11  | 59   | 13.14  |   |
| 7713 | Map2k2       | 1    | 443  | 56.75  | 313  | 56.86  |   |
| 7714 | Nr2c1        | 1    | 203  | 6.45   | 161  | 6.47   |   |
| 7715 | Nudcd2       | 1    | 74   | 11.75  | 52   | 11.77  |   |
| 7716 | Sav1         | 1    | 160  | 16.24  | 100  | 16.26  |   |
| 7717 | Golt1b       | 1    | 182  | 14.19  | 125  | 14.21  |   |

Supplemental Table 2  
Vehicle versus FSH, 24 hours

|      | A              | B  | C    | D      | E    | F      | G |
|------|----------------|----|------|--------|------|--------|---|
| 7718 | AABR07048064.1 | 1  | 16   | 5.85   | 11   | 5.85   |   |
| 7719 | Aldh16a1       | 1  | 101  | 8.44   | 73   | 8.45   |   |
| 7720 | Nudt9          | 1  | 58   | 8.05   | 39   | 8.06   |   |
| 7721 | Zmym5          | 1  | 129  | 11.88  | 88   | 11.9   |   |
| 7722 | Cks1b          | 1  | 132  | 20.96  | 94   | 20.98  |   |
| 7723 | Mblac2         | 1  | 75   | 2.75   | 58   | 2.75   |   |
| 7724 | Tmbim6         | 1  | 1057 | 115.67 | 696  | 115.75 |   |
| 7725 | Mdfic          | 1  | 357  | 20     | 251  | 20.01  |   |
| 7726 | Fam175b        | 1  | 126  | 9.57   | 93   | 9.58   |   |
| 7727 | Os9            | 1  | 403  | 35.46  | 277  | 35.48  |   |
| 7728 | Cdk9           | 1  | 302  | 41.08  | 197  | 41.1   |   |
| 7729 | Eif2b1         | 1  | 88   | 10.85  | 65   | 10.85  |   |
| 7730 | Papss1         | 1  | 294  | 24.19  | 189  | 24.19  |   |
| 7731 | Prrc2b         | 1  | 1119 | 37.38  | 766  | 37.38  |   |
| 7732 | Trim3          | -1 | 142  | 8.03   | 80   | 8.03   |   |
| 7733 | Atp6v1b2       | -1 | 306  | 27.07  | 212  | 27.07  |   |
| 7734 | Srsf9          | -1 | 261  | 49.56  | 202  | 49.55  |   |
| 7735 | Elavl1         | -1 | 629  | 47.81  | 441  | 47.8   |   |
| 7736 | Stt3b          | -1 | 1041 | 44.39  | 761  | 44.39  |   |
| 7737 | Klhl21         | -1 | 136  | 8.13   | 88   | 8.13   |   |
| 7738 | Diaph1         | -1 | 576  | 21.72  | 413  | 21.71  |   |
| 7739 | Anapc4         | -1 | 265  | 15.45  | 187  | 15.44  |   |
| 7740 | Atp6v1g1       | -1 | 270  | 58.7   | 186  | 58.66  |   |
| 7741 | Rtn3           | -1 | 786  | 35.61  | 521  | 35.58  |   |
| 7742 | AABR07057519.1 | -1 | 16   | 1.27   | 12   | 1.27   |   |
| 7743 | Mospd1         | -1 | 22   | 6.21   | 19   | 6.2    |   |
| 7744 | Rnf138         | -1 | 71   | 6.33   | 49   | 6.32   |   |
| 7745 | AABR07072602.1 | -1 | 20   | 5.06   | 19   | 5.05   |   |
| 7746 | Cmtm4          | -1 | 49   | 5.51   | 36   | 5.51   |   |
| 7747 | Fance          | -1 | 45   | 4.3    | 44   | 4.29   |   |
| 7748 | Lgalsl         | -1 | 64   | 4.55   | 43   | 4.54   |   |
| 7749 | LOC100362298   | -1 | 0    | 8.69   | 0    | 8.68   |   |
| 7750 | Map3k9         | -1 | 23   | 1.08   | 13   | 1.07   |   |
| 7751 | Mrpl21         | -1 | 38   | 8.47   | 28   | 8.46   |   |
| 7752 | Mthfd2l        | -1 | 41   | 1.35   | 60   | 1.35   |   |
| 7753 | Nle1           | -1 | 53   | 6.83   | 40   | 6.83   |   |
| 7754 | Pdpn           | -1 | 101  | 12.92  | 69   | 12.9   |   |
| 7755 | Pptc7          | -1 | 230  | 8.5    | 189  | 8.49   |   |
| 7756 | Susd6          | -1 | 278  | 15.18  | 198  | 15.16  |   |
| 7757 | Tead4          | -1 | 116  | 5.31   | 94   | 5.31   |   |
| 7758 | Tmem121        | -1 | 16   | 4.17   | 11   | 4.16   |   |
| 7759 | Timm8b         | -1 | 7    | 16.44  | 8    | 16.42  |   |
| 7760 | Fam179b        | -1 | 290  | 7.98   | 203  | 7.97   |   |
| 7761 | Lrba           | -1 | 282  | 5.28   | 215  | 5.27   |   |
| 7762 | LOC100912604   | -1 | 0    | 30.62  | 0    | 30.58  |   |
| 7763 | Slc35b1        | -1 | 296  | 43.29  | 202  | 43.22  |   |
| 7764 | Ldha           | -1 | 911  | 266.14 | 700  | 265.67 |   |
| 7765 | Ppm1d          | -1 | 114  | 7.11   | 85   | 7.09   |   |
| 7766 | Tpt1           | -1 | 1123 | 558.34 | 845  | 557.03 |   |
| 7767 | Ppp2r1b        | -1 | 272  | 15.36  | 187  | 15.32  |   |
| 7768 | Aco2           | -1 | 1564 | 59.89  | 1100 | 59.74  |   |
| 7769 | Scd1           | -1 | 868  | 51.84  | 588  | 51.7   |   |
| 7770 | Ddx23          | -1 | 484  | 36.54  | 332  | 36.44  |   |
| 7771 | Dcun1d4        | -1 | 116  | 5.02   | 89   | 5.01   |   |



Supplemental Table 2  
Vehicle versus FSH, 24 hours

|      | A              | B     | C    | D      | E    | F      | G |
|------|----------------|-------|------|--------|------|--------|---|
| 7772 | Ap3d1          | -1    | 760  | 37.02  | 517  | 36.91  |   |
| 7773 | Cox4i1         | -1    | 632  | 196.33 | 435  | 195.65 |   |
| 7774 | Ankrd32        | -1    | 56   | 2.33   | 44   | 2.32   |   |
| 7775 | Dlg3           | -1    | 78   | 2.88   | 67   | 2.87   |   |
| 7776 | Nlrp1a         | -1    | 41   | 1.23   | 28   | 1.23   |   |
| 7777 | Preb           | -1    | 41   | 13.14  | 33   | 13.09  |   |
| 7778 | Sap30l         | -1    | 43   | 15.88  | 36   | 15.83  |   |
| 7779 | Zfp593         | -1    | 35   | 4.34   | 24   | 4.32   |   |
| 7780 | Capn7          | -1    | 188  | 11.2   | 122  | 11.16  |   |
| 7781 | Vopp1          | -1    | 95   | 7.69   | 65   | 7.66   |   |
| 7782 | Sf3b2          | -1    | 740  | 56.5   | 512  | 56.26  |   |
| 7783 | Samd4b         | -1    | 474  | 25.97  | 323  | 25.86  |   |
| 7784 | Psmc4          | -1    | 419  | 72.62  | 286  | 72.31  |   |
| 7785 | Prep           | -1    | 427  | 31.19  | 304  | 31.05  |   |
| 7786 | Tgs1           | -1    | 173  | 7.35   | 116  | 7.32   |   |
| 7787 | Hsbp1          | -1.01 | 377  | 70.56  | 260  | 70.2   |   |
| 7788 | Gtpbp4         | -1.01 | 88   | 10.82  | 66   | 10.76  |   |
| 7789 | Ddx5           | -1.01 | 2045 | 175.88 | 1508 | 174.95 |   |
| 7790 | Pcna           | -1.01 | 292  | 60.57  | 192  | 60.24  |   |
| 7791 | AABR07053879.1 | -1.01 | 3    | 4.84   | 2    | 4.81   |   |
| 7792 | Dcn            | -1.01 | 96   | 12.71  | 67   | 12.64  |   |
| 7793 | lqcb1          | -1.01 | 62   | 3.33   | 38   | 3.31   |   |
| 7794 | Polr1e         | -1.01 | 24   | 2.71   | 19   | 2.69   |   |
| 7795 | Ankrd13b       | -1.01 | 61   | 4.5    | 34   | 4.48   |   |
| 7796 | Ccdc102a       | -1.01 | 123  | 8.24   | 79   | 8.19   |   |
| 7797 | Gfm2           | -1.01 | 81   | 3.97   | 61   | 3.95   |   |
| 7798 | Mapk3          | -1.01 | 802  | 107.17 | 563  | 106.53 |   |
| 7799 | Dhcr24         | -1.01 | 788  | 48.35  | 536  | 48.06  |   |
| 7800 | Tnpo3          | -1.01 | 456  | 25.41  | 323  | 25.25  |   |
| 7801 | Polg           | -1.01 | 224  | 13.05  | 149  | 12.97  |   |
| 7802 | Yipf5          | -1.01 | 249  | 17.59  | 164  | 17.47  |   |
| 7803 | Mageh1         | -1.01 | 98   | 19.55  | 67   | 19.42  |   |
| 7804 | Polr1b         | -1.01 | 74   | 3.97   | 45   | 3.95   |   |
| 7805 | Maz            | -1.01 | 178  | 28.03  | 121  | 27.83  |   |
| 7806 | Rslcan18       | -1.01 | 42   | 4.28   | 28   | 4.25   |   |
| 7807 | Slc38a9        | -1.01 | 83   | 2.28   | 70   | 2.26   |   |
| 7808 | Snx25          | -1.01 | 52   | 3.67   | 34   | 3.64   |   |
| 7809 | Serp1          | -1.01 | 457  | 46.94  | 310  | 46.56  |   |
| 7810 | Pex13          | -1.01 | 117  | 10.14  | 81   | 10.06  |   |
| 7811 | Ssr1           | -1.01 | 644  | 43.86  | 435  | 43.51  |   |
| 7812 | Ak3            | -1.01 | 285  | 39.44  | 222  | 39.12  |   |
| 7813 | Dpm2           | -1.01 | 68   | 19.28  | 46   | 19.13  |   |
| 7814 | Farp2          | -1.01 | 273  | 3.64   | 147  | 3.61   |   |
| 7815 | Icmt           | -1.01 | 76   | 8.98   | 45   | 8.9    |   |
| 7816 | Scamp4         | -1.01 | 327  | 36.4   | 209  | 36.1   |   |
| 7817 | Smim20         | -1.01 | 80   | 17.64  | 61   | 17.49  |   |
| 7818 | Srd5a3         | -1.01 | 140  | 19.75  | 110  | 19.58  |   |
| 7819 | Athl1          | -1.01 | 64   | 6.77   | 50   | 6.72   |   |
| 7820 | Clasp1         | -1.01 | 441  | 17.49  | 358  | 17.34  |   |
| 7821 | Ptpn23         | -1.01 | 372  | 17.19  | 255  | 17.05  |   |
| 7822 | Kdm2b          | -1.01 | 220  | 9.82   | 170  | 9.74   |   |
| 7823 | Nt5dc2         | -1.01 | 224  | 30.09  | 149  | 29.82  |   |
| 7824 | Tnpo2          | -1.01 | 824  | 38.62  | 538  | 38.26  |   |
| 7825 | Ankrd49        | -1.01 | 48   | 5.13   | 33   | 5.08   |   |

Supplemental Table 2  
Vehicle versus FSH, 24 hours

|      | A            | B     | C    | D      | E    | F      | G |
|------|--------------|-------|------|--------|------|--------|---|
| 7826 | Mipol1       | -1.01 | 67   | 3.27   | 77   | 3.24   |   |
| 7827 | Nup85        | -1.01 | 102  | 10.01  | 65   | 9.92   |   |
| 7828 | Pithd1       | -1.01 | 95   | 11.61  | 62   | 11.51  |   |
| 7829 | Mrpl13       | -1.01 | 111  | 26.13  | 82   | 25.89  |   |
| 7830 | Pcyt2        | -1.01 | 251  | 26.26  | 169  | 26.01  |   |
| 7831 | Tceb1        | -1.01 | 80   | 11.93  | 59   | 11.82  |   |
| 7832 | Tmem63a      | -1.01 | 28   | 1.49   | 16   | 1.48   |   |
| 7833 | Sbno2        | -1.01 | 290  | 8.55   | 197  | 8.47   |   |
| 7834 | Phb2         | -1.01 | 331  | 58.3   | 224  | 57.74  |   |
| 7835 | Imp4         | -1.01 | 140  | 19.29  | 101  | 19.1   |   |
| 7836 | Rad54l2      | -1.01 | 45   | 5.15   | 45   | 5.1    |   |
| 7837 | Tacc3        | -1.01 | 78   | 9.18   | 56   | 9.09   |   |
| 7838 | Qrich1       | -1.01 | 516  | 27.57  | 364  | 27.29  |   |
| 7839 | Atp6v1d      | -1.01 | 183  | 31.39  | 123  | 31.06  |   |
| 7840 | Pcca         | -1.01 | 88   | 5.2    | 70   | 5.14   |   |
| 7841 | Mea1         | -1.01 | 348  | 78.2   | 243  | 77.36  |   |
| 7842 | Dut          | -1.01 | 118  | 19.21  | 112  | 19     |   |
| 7843 | Mlf2         | -1.01 | 500  | 70.36  | 344  | 69.57  |   |
| 7844 | Rab8a        | -1.01 | 196  | 24.16  | 131  | 23.89  |   |
| 7845 | Srp72        | -1.01 | 280  | 19.23  | 213  | 19.01  |   |
| 7846 | LOC100360087 | -1.01 | 161  | 254.93 | 120  | 252.01 |   |
| 7847 | Fam168b      | -1.01 | 814  | 46.14  | 551  | 45.6   |   |
| 7848 | Gspt2        | -1.01 | 28   | 1.73   | 18   | 1.71   |   |
| 7849 | Hspb6        | -1.01 | 28   | 4.76   | 20   | 4.7    |   |
| 7850 | Klhl23       | -1.01 | 75   | 3.52   | 54   | 3.48   |   |
| 7851 | Tex30        | -1.01 | 49   | 3.2    | 30   | 3.16   |   |
| 7852 | Txnrd2       | -1.01 | 162  | 11.32  | 111  | 11.19  |   |
| 7853 | LOC100911093 | -1.01 | 48   | 8.4    | 45   | 8.3    |   |
| 7854 | Actr1b       | -1.01 | 471  | 29.85  | 319  | 29.48  |   |
| 7855 | Tjap1        | -1.01 | 205  | 12.42  | 145  | 12.27  |   |
| 7856 | Pdcd6        | -1.01 | 215  | 24.9   | 141  | 24.6   |   |
| 7857 | Shc1         | -1.01 | 331  | 21.13  | 217  | 20.87  |   |
| 7858 | Tceb3        | -1.01 | 362  | 24.05  | 245  | 23.75  |   |
| 7859 | Lamtor5      | -1.01 | 87   | 22.11  | 56   | 21.83  |   |
| 7860 | Lig3         | -1.01 | 292  | 11.79  | 187  | 11.64  |   |
| 7861 | Tlk2         | -1.01 | 264  | 14.13  | 201  | 13.95  |   |
| 7862 | Adgrl2       | -1.01 | 594  | 19.81  | 384  | 19.55  |   |
| 7863 | Atp9b        | -1.01 | 411  | 11.44  | 268  | 11.29  |   |
| 7864 | Rfc2         | -1.01 | 63   | 8.65   | 45   | 8.54   |   |
| 7865 | Brwd1        | -1.01 | 410  | 5.66   | 309  | 5.58   |   |
| 7866 | Exosc2       | -1.01 | 64   | 7.03   | 44   | 6.94   |   |
| 7867 | Tmem245      | -1.01 | 322  | 22.42  | 239  | 22.13  |   |
| 7868 | Fam181b      | -1.01 | 103  | 22.42  | 83   | 22.13  |   |
| 7869 | Son          | -1.01 | 2802 | 69.6   | 1887 | 68.66  |   |
| 7870 | Ubr5         | -1.01 | 990  | 30.95  | 664  | 30.53  |   |
| 7871 | Rbm6         | -1.01 | 325  | 12.92  | 271  | 12.75  |   |
| 7872 | Dld          | -1.01 | 242  | 21.1   | 171  | 20.81  |   |
| 7873 | Mta2         | -1.01 | 542  | 43.86  | 364  | 43.26  |   |
| 7874 | Csnk2a1      | -1.01 | 474  | 53.8   | 344  | 53.05  |   |
| 7875 | Ubqln4       | -1.01 | 447  | 29.25  | 296  | 28.84  |   |
| 7876 | Atg4d        | -1.01 | 100  | 10.79  | 70   | 10.64  |   |
| 7877 | Lats1        | -1.01 | 532  | 15.75  | 351  | 15.53  |   |
| 7878 | Lcmt1        | -1.01 | 97   | 10.32  | 71   | 10.18  |   |
| 7879 | Mmp24        | -1.01 | 32   | 1.72   | 19   | 1.69   |   |

Supplemental Table 2  
Vehicle versus FSH, 24 hours

|      | A              | B     | C    | D     | E    | F     | G |
|------|----------------|-------|------|-------|------|-------|---|
| 7880 | Ythdc2         | -1.01 | 47   | 3.65  | 43   | 3.59  |   |
| 7881 | AC097890.1     | -1.01 | 14   | 3.6   | 8    | 3.55  |   |
| 7882 | Atg7           | -1.01 | 94   | 4.61  | 71   | 4.54  |   |
| 7883 | Bmf            | -1.01 | 36   | 3.35  | 23   | 3.3   |   |
| 7884 | Ckap5          | -1.01 | 543  | 21.39 | 377  | 21.08 |   |
| 7885 | Tsn            | -1.01 | 117  | 16.96 | 68   | 16.72 |   |
| 7886 | LOC100911576   | -1.01 | 4    | 12.44 | 5    | 12.26 |   |
| 7887 | Tcf25          | -1.02 | 930  | 60.53 | 668  | 59.63 |   |
| 7888 | Mdm1           | -1.02 | 76   | 4.11  | 57   | 4.05  |   |
| 7889 | Unc45a         | -1.02 | 323  | 22.26 | 220  | 21.93 |   |
| 7890 | Ppp2r2a        | -1.02 | 507  | 37.57 | 373  | 37.01 |   |
| 7891 | Rbm15          | -1.02 | 167  | 9.17  | 128  | 9.04  |   |
| 7892 | Ccdc47         | -1.02 | 490  | 27.99 | 323  | 27.56 |   |
| 7893 | Gpr107         | -1.02 | 310  | 15.45 | 204  | 15.22 |   |
| 7894 | Cln5           | -1.02 | 31   | 3.83  | 21   | 3.77  |   |
| 7895 | Palb2          | -1.02 | 43   | 2.09  | 37   | 2.06  |   |
| 7896 | Smim12         | -1.02 | 32   | 7.87  | 21   | 7.75  |   |
| 7897 | Vkorc11l_1     | -1.02 | 0    | 14.55 | 0    | 14.32 |   |
| 7898 | Zufsp          | -1.02 | 54   | 3.83  | 56   | 3.77  |   |
| 7899 | Cyfp1          | -1.02 | 810  | 39.36 | 537  | 38.73 |   |
| 7900 | Cenpb          | -1.02 | 255  | 31.41 | 174  | 30.9  |   |
| 7901 | R3hdm2         | -1.02 | 473  | 20.67 | 326  | 20.33 |   |
| 7902 | P4ha2          | -1.02 | 275  | 23.15 | 202  | 22.78 |   |
| 7903 | Mob1b          | -1.02 | 152  | 11.98 | 110  | 11.78 |   |
| 7904 | Slc39a7        | -1.02 | 752  | 79.58 | 510  | 78.28 |   |
| 7905 | Anp32a         | -1.02 | 478  | 94.87 | 365  | 93.3  |   |
| 7906 | Traf7          | -1.02 | 336  | 28.87 | 220  | 28.38 |   |
| 7907 | AABR07037528.1 | -1.02 | 34   | 6.9   | 23   | 6.78  |   |
| 7908 | Cdadcl1        | -1.02 | 55   | 6.56  | 38   | 6.45  |   |
| 7909 | Ddx50          | -1.02 | 213  | 13.44 | 153  | 13.21 |   |
| 7910 | Frrs1          | -1.02 | 39   | 4.76  | 25   | 4.68  |   |
| 7911 | Rnf19a         | -1.02 | 430  | 22.44 | 299  | 22.05 |   |
| 7912 | Nfat5          | -1.02 | 603  | 10.16 | 415  | 9.98  |   |
| 7913 | Msl3           | -1.02 | 156  | 15.44 | 117  | 15.17 |   |
| 7914 | Parp3          | -1.02 | 113  | 12.51 | 70   | 12.29 |   |
| 7915 | Tomm22         | -1.02 | 210  | 50.8  | 142  | 49.92 |   |
| 7916 | Mcm6           | -1.02 | 291  | 24.26 | 200  | 23.83 |   |
| 7917 | Trip12         | -1.02 | 1600 | 49.58 | 1121 | 48.71 |   |
| 7918 | Ddx19a         | -1.02 | 604  | 11.48 | 427  | 11.28 |   |
| 7919 | Zfand3         | -1.02 | 605  | 38.29 | 442  | 37.6  |   |
| 7920 | Arhgef11       | -1.02 | 611  | 25.01 | 417  | 24.56 |   |
| 7921 | Aven           | -1.02 | 51   | 8.71  | 37   | 8.55  |   |
| 7922 | Hes1           | -1.02 | 38   | 6.38  | 25   | 6.27  |   |
| 7923 | Serhl2         | -1.02 | 8    | 3.7   | 4    | 3.63  |   |
| 7924 | Oat            | -1.02 | 170  | 17.52 | 107  | 17.19 |   |
| 7925 | Sik3           | -1.02 | 789  | 19.2  | 562  | 18.84 |   |
| 7926 | Vti1b          | -1.02 | 54   | 8.6   | 42   | 8.43  |   |
| 7927 | Tfrc           | -1.02 | 616  | 31.54 | 416  | 30.94 |   |
| 7928 | Upf1           | -1.02 | 493  | 28.73 | 339  | 28.17 |   |
| 7929 | Wbp11_1        | -1.02 | 4    | 19.82 | 2    | 19.43 |   |
| 7930 | Lsm12          | -1.02 | 368  | 38.03 | 251  | 37.28 |   |
| 7931 | E2f4           | -1.02 | 156  | 15.91 | 104  | 15.59 |   |
| 7932 | Capns1         | -1.02 | 0    | 43.29 | 0    | 42.42 |   |
| 7933 | Hacl1          | -1.02 | 62   | 1.84  | 43   | 1.8   |   |

Supplemental Table 2  
Vehicle versus FSH, 24 hours

|      | A        | B     | C   | D     | E   | F      | G |
|------|----------|-------|-----|-------|-----|--------|---|
| 7934 | Rpa3     | -1.02 | 48  | 17.36 | 33  | 17.02  |   |
| 7935 | Map3k11  | -1.02 | 198 | 12.64 | 132 | 12.38  |   |
| 7936 | Fnip1    | -1.02 | 94  | 4.31  | 65  | 4.22   |   |
| 7937 | Tubgcp3  | -1.02 | 216 | 12.52 | 142 | 12.26  |   |
| 7938 | Nde1     | -1.02 | 107 | 10.65 | 79  | 10.43  |   |
| 7939 | Cand1    | -1.02 | 642 | 35.19 | 434 | 34.45  |   |
| 7940 | Slc25a16 | -1.02 | 142 | 3.77  | 96  | 3.69   |   |
| 7941 | Ttc26    | -1.02 | 75  | 3.75  | 65  | 3.67   |   |
| 7942 | Khynyn   | -1.02 | 65  | 6.02  | 44  | 5.89   |   |
| 7943 | Ppp1ca   | -1.02 | 901 | 148.4 | 606 | 145.22 |   |
| 7944 | Eif3j    | -1.02 | 298 | 34.53 | 206 | 33.79  |   |
| 7945 | Prkrip1  | -1.02 | 145 | 6.17  | 94  | 6.04   |   |
| 7946 | Dtymk    | -1.02 | 204 | 27.39 | 163 | 26.79  |   |
| 7947 | Ano10    | -1.02 | 136 | 10.82 | 91  | 10.58  |   |
| 7948 | Cep131   | -1.02 | 63  | 3.51  | 46  | 3.43   |   |
| 7949 | Cmtm3    | -1.02 | 165 | 24.16 | 113 | 23.63  |   |
| 7950 | Prdx6    | -1.02 | 240 | 66.2  | 147 | 64.73  |   |
| 7951 | Sugp1    | -1.02 | 174 | 12.84 | 121 | 12.56  |   |
| 7952 | Magi3    | -1.02 | 180 | 4.54  | 115 | 4.44   |   |
| 7953 | Kdelr2   | -1.02 | 707 | 90.15 | 487 | 88.14  |   |
| 7954 | Noc2l    | -1.02 | 251 | 22.48 | 164 | 21.98  |   |
| 7955 | Nek7     | -1.02 | 78  | 12.45 | 49  | 12.17  |   |
| 7956 | Arl8b    | -1.02 | 307 | 25.39 | 204 | 24.82  |   |
| 7957 | Abl1     | -1.02 | 282 | 27.19 | 175 | 26.58  |   |
| 7958 | Trim26   | -1.02 | 193 | 8.41  | 141 | 8.22   |   |
| 7959 | Celf1    | -1.02 | 571 | 49.13 | 353 | 48.02  |   |
| 7960 | Eil2     | -1.02 | 142 | 6.27  | 90  | 6.12   |   |
| 7961 | Fam13b   | -1.02 | 335 | 17.24 | 210 | 16.84  |   |
| 7962 | Rcor1_1  | -1.02 | 115 | 26.25 | 70  | 25.65  |   |
| 7963 | Tro      | -1.02 | 167 | 8.16  | 106 | 7.98   |   |
| 7964 | Herc1    | -1.02 | 463 | 6.74  | 310 | 6.59   |   |
| 7965 | Epg5     | -1.02 | 320 | 7.45  | 211 | 7.28   |   |
| 7966 | Nxt1     | -1.02 | 61  | 17.84 | 41  | 17.42  |   |
| 7967 | Numb1    | -1.02 | 100 | 5.02  | 77  | 4.91   |   |
| 7968 | Rab14    | -1.02 | 248 | 34.51 | 150 | 33.7   |   |
| 7969 | Agap3    | -1.02 | 312 | 9.31  | 220 | 9.09   |   |
| 7970 | Gatad1   | -1.02 | 82  | 20.06 | 53  | 19.58  |   |
| 7971 | Msantd3  | -1.02 | 96  | 4.69  | 60  | 4.58   |   |
| 7972 | Szrd1    | -1.02 | 582 | 37.51 | 375 | 36.6   |   |
| 7973 | Ube2d2   | -1.03 | 317 | 47.51 | 197 | 46.34  |   |
| 7974 | Fam214b  | -1.03 | 83  | 7.98  | 56  | 7.78   |   |
| 7975 | Dnajc3   | -1.03 | 246 | 31.53 | 165 | 30.75  |   |
| 7976 | Xpc      | -1.03 | 217 | 10.63 | 165 | 10.36  |   |
| 7977 | Gli3     | -1.03 | 225 | 7.67  | 158 | 7.48   |   |
| 7978 | Park7    | -1.03 | 253 | 26.55 | 181 | 25.89  |   |
| 7979 | Brap     | -1.03 | 112 | 11.18 | 70  | 10.9   |   |
| 7980 | Cldnd1   | -1.03 | 333 | 39.25 | 218 | 38.26  |   |
| 7981 | Lonp1    | -1.03 | 358 | 26.65 | 227 | 25.98  |   |
| 7982 | Med4     | -1.03 | 96  | 14.89 | 64  | 14.52  |   |
| 7983 | Scaf4    | -1.03 | 265 | 8.27  | 194 | 8.06   |   |
| 7984 | Tcerg1   | -1.03 | 434 | 19.18 | 318 | 18.69  |   |
| 7985 | Unc5b    | -1.03 | 944 | 38.64 | 615 | 37.64  |   |
| 7986 | Ube4b    | -1.03 | 514 | 19.75 | 356 | 19.24  |   |
| 7987 | Csnk1d   | -1.03 | 733 | 34.76 | 460 | 33.86  |   |

Supplemental Table 2  
Vehicle versus FSH, 24 hours

|      | A              | B     | C    | D      | E    | F     | G |
|------|----------------|-------|------|--------|------|-------|---|
| 7988 | Nom1           | -1.03 | 121  | 9.64   | 91   | 9.39  |   |
| 7989 | Pknx1          | -1.03 | 116  | 5.49   | 70   | 5.34  |   |
| 7990 | Rabac1         | -1.03 | 111  | 27.56  | 89   | 26.84 |   |
| 7991 | Zcchc14        | -1.03 | 230  | 14.17  | 156  | 13.79 |   |
| 7992 | Gemin5         | -1.03 | 224  | 9.96   | 163  | 9.69  |   |
| 7993 | Gtf2a2         | -1.03 | 146  | 32.78  | 100  | 31.91 |   |
| 7994 | Plekha8        | -1.03 | 114  | 3.86   | 74   | 3.75  |   |
| 7995 | Psm11          | -1.03 | 503  | 32.93  | 347  | 32.05 |   |
| 7996 | Cul3           | -1.03 | 332  | 17.62  | 220  | 17.12 |   |
| 7997 | Apba3          | -1.03 | 144  | 18.01  | 101  | 17.51 |   |
| 7998 | Psm13          | -1.03 | 388  | 54.66  | 258  | 53.11 |   |
| 7999 | Srrm1          | -1.03 | 856  | 43.68  | 576  | 42.44 |   |
| 8000 | Zfp507         | -1.03 | 283  | 10.15  | 205  | 9.86  |   |
| 8001 | Ubc            | -1.03 | 5740 | 561.09 | 3810 | 544.6 |   |
| 8002 | lds            | -1.03 | 306  | 43.18  | 198  | 41.91 |   |
| 8003 | Wdfy3          | -1.03 | 1050 | 21.53  | 703  | 20.9  |   |
| 8004 | Tmem214        | -1.03 | 313  | 20.25  | 211  | 19.65 |   |
| 8005 | Tdg            | -1.03 | 360  | 23.22  | 259  | 22.53 |   |
| 8006 | Lrp6           | -1.03 | 416  | 15.04  | 294  | 14.59 |   |
| 8007 | 7SK_394        | -1.03 | 0    | 2.56   | 0    | 2.48  |   |
| 8008 | AABR07046778.1 | -1.03 | 1    | 2.8    | 0    | 2.71  |   |
| 8009 | AC094902.1     | -1.03 | 0    | 0.36   | 0    | 0.35  |   |
| 8010 | AC114343.1     | -1.03 | 0    | 0.39   | 0    | 0.38  |   |
| 8011 | Ahsp           | -1.03 | 3    | 1.34   | 3    | 1.3   |   |
| 8012 | Atxn3          | -1.03 | 88   | 3.17   | 58   | 3.07  |   |
| 8013 | Cd82           | -1.03 | 41   | 4.13   | 22   | 4     |   |
| 8014 | Chid1          | -1.03 | 0    | 4.02   | 0    | 3.89  |   |
| 8015 | Cmb1           | -1.03 | 11   | 0.66   | 9    | 0.64  |   |
| 8016 | Cmtm8          | -1.03 | 14   | 0.65   | 10   | 0.63  |   |
| 8017 | Dbn1           | -1.03 | 6    | 0.89   | 8    | 0.86  |   |
| 8018 | Dhx58          | -1.03 | 7    | 0.57   | 5    | 0.55  |   |
| 8019 | Dis3l1         | -1.03 | 131  | 8      | 85   | 7.75  |   |
| 8020 | Eva1a          | -1.03 | 3    | 0.43   | 4    | 0.42  |   |
| 8021 | Fem1b          | -1.03 | 297  | 26.02  | 172  | 25.21 |   |
| 8022 | Gbp5           | -1.03 | 4    | 0.24   | 3    | 0.23  |   |
| 8023 | Gpm6b          | -1.03 | 11   | 0.66   | 6    | 0.64  |   |
| 8024 | Gprin2         | -1.03 | 3    | 0.55   | 2    | 0.53  |   |
| 8025 | Hhat           | -1.03 | 23   | 1.52   | 23   | 1.47  |   |
| 8026 | Homer2         | -1.03 | 14   | 1.13   | 9    | 1.09  |   |
| 8027 | Il22ra1        | -1.03 | 6    | 0.13   | 2    | 0.12  |   |
| 8028 | LOC100910575   | -1.03 | 1    | 0.88   | 0    | 0.85  |   |
| 8029 | LOC100910689   | -1.03 | 0    | 0.9    | 1    | 0.87  |   |
| 8030 | LOC100910934   | -1.03 | 0    | 0.6    | 0    | 0.58  |   |
| 8031 | LOC360919      | -1.03 | 6    | 0.32   | 15   | 0.31  |   |
| 8032 | LOC688672      | -1.03 | 3    | 1.23   | 1    | 1.19  |   |
| 8033 | Lrfn1          | -1.03 | 37   | 3.14   | 25   | 3.04  |   |
| 8034 | Mars2          | -1.03 | 0    | 0.85   | 0    | 0.82  |   |
| 8035 | Mrc1           | -1.03 | 14   | 0.29   | 10   | 0.28  |   |
| 8036 | Mrps28         | -1.03 | 96   | 9.52   | 66   | 9.22  |   |
| 8037 | Msl1l1         | -1.03 | 3    | 0.36   | 1    | 0.35  |   |
| 8038 | Mterfd3        | -1.03 | 20   | 0.46   | 14   | 0.45  |   |
| 8039 | Myo7b          | -1.03 | 1918 | 0.11   | 292  | 0.11  |   |
| 8040 | Neu3           | -1.03 | 10   | 0.65   | 5    | 0.63  |   |
| 8041 | Oip5           | -1.03 | 7    | 1.1    | 8    | 1.06  |   |

Supplemental Table 2  
Vehicle versus FSH, 24 hours

|      | A              | B     | C    | D     | E   | F     | G |
|------|----------------|-------|------|-------|-----|-------|---|
| 8042 | Pag1           | -1.03 | 30   | 3.66  | 14  | 3.54  |   |
| 8043 | Pbx3           | -1.03 | 119  | 6.91  | 78  | 6.7   |   |
| 8044 | Pcdhb17        | -1.03 | 6    | 0.62  | 4   | 0.6   |   |
| 8045 | Pde3b          | -1.03 | 12   | 0.17  | 20  | 0.16  |   |
| 8046 | Perp           | -1.03 | 3    | 0.4   | 3   | 0.39  |   |
| 8047 | Pigp           | -1.03 | 20   | 4.01  | 19  | 3.88  |   |
| 8048 | Qtrtd1         | -1.03 | 21   | 2.99  | 16  | 2.89  |   |
| 8049 | RGD1307621     | -1.03 | 17   | 2.37  | 13  | 2.29  |   |
| 8050 | RGD1566320     | -1.03 | 28   | 10.41 | 19  | 10.09 |   |
| 8051 | Rn60_11_0375.8 | -1.03 | 27   | 9.97  | 18  | 9.66  |   |
| 8052 | Rn60_6_0863.2  | -1.03 | 4    | 4.52  | 2   | 4.38  |   |
| 8053 | Rpl39_3        | -1.03 | 0    | 9.58  | 0   | 9.28  |   |
| 8054 | Rwdd3          | -1.03 | 8    | 1.41  | 15  | 1.37  |   |
| 8055 | Sft2d3         | -1.03 | 24   | 2.72  | 16  | 2.63  |   |
| 8056 | Sgol2          | -1.03 | 11   | 0.57  | 9   | 0.56  |   |
| 8057 | Sh3bp2         | -1.03 | 30   | 2.09  | 18  | 2.03  |   |
| 8058 | Shank3         | -1.03 | 14   | 0.14  | 5   | 0.14  |   |
| 8059 | Sirt5          | -1.03 | 169  | 16.78 | 138 | 16.25 |   |
| 8060 | SNORD14_2      | -1.03 | 0    | 8.79  | 0   | 8.52  |   |
| 8061 | Stambpl1       | -1.03 | 28   | 2.4   | 28  | 2.33  |   |
| 8062 | Timm10b_2      | -1.03 | 0    | 1     | 1   | 0.96  |   |
| 8063 | Tlr4           | -1.03 | 6    | 0.45  | 5   | 0.43  |   |
| 8064 | Traf3ip2       | -1.03 | 44   | 2.18  | 22  | 2.12  |   |
| 8065 | Ttc9           | -1.03 | 8    | 0.65  | 4   | 0.63  |   |
| 8066 | Ubac1          | -1.03 | 78   | 8.29  | 55  | 8.03  |   |
| 8067 | Wbscr17        | -1.03 | 39   | 0.39  | 22  | 0.38  |   |
| 8068 | Wnk1           | -1.03 | 1265 | 26.03 | 863 | 25.22 |   |
| 8069 | Zfand1         | -1.03 | 14   | 3.71  | 14  | 3.59  |   |
| 8070 | Zfp3           | -1.03 | 14   | 1.22  | 8   | 1.18  |   |
| 8071 | Zfp407         | -1.03 | 193  | 3.73  | 149 | 3.62  |   |
| 8072 | Zfp511         | -1.03 | 35   | 6.13  | 27  | 5.94  |   |
| 8073 | Zfp526         | -1.03 | 93   | 4.76  | 61  | 4.61  |   |
| 8074 | Zfp759         | -1.03 | 51   | 1.15  | 43  | 1.12  |   |
| 8075 | Zmpste24       | -1.03 | 129  | 13.28 | 92  | 12.86 |   |
| 8076 | 2900026A02Rik  | -1.03 | 9    | 0.07  | 9   | 0.07  |   |
| 8077 | AABR07000121.1 | -1.03 | 19   | 0.61  | 12  | 0.59  |   |
| 8078 | AABR07003017.1 | -1.03 | 0    | 1.68  | 0   | 1.63  |   |
| 8079 | AABR07011682.1 | -1.03 | 16   | 1.44  | 14  | 1.4   |   |
| 8080 | AABR07031399.1 | -1.03 | 13   | 0.49  | 8   | 0.47  |   |
| 8081 | AABR07035832.1 | -1.03 | 8    | 2.27  | 6   | 2.19  |   |
| 8082 | AABR07044414.1 | -1.03 | 0    | 0.85  | 0   | 0.82  |   |
| 8083 | AABR07051249.1 | -1.03 | 6    | 0.33  | 2   | 0.32  |   |
| 8084 | AABR07057683.1 | -1.03 | 8    | 4.89  | 4   | 4.73  |   |
| 8085 | Abhd5          | -1.03 | 80   | 5.91  | 53  | 5.73  |   |
| 8086 | Abhd6          | -1.03 | 194  | 9.91  | 127 | 9.6   |   |
| 8087 | AC127013.1     | -1.03 | 0    | 0.72  | 0   | 0.7   |   |
| 8088 | Acd            | -1.03 | 56   | 19.01 | 42  | 18.42 |   |
| 8089 | Ackr4          | -1.03 | 1    | 0.37  | 0   | 0.36  |   |
| 8090 | Akr1b8         | -1.03 | 30   | 2.12  | 23  | 2.05  |   |
| 8091 | Arhgap26       | -1.03 | 55   | 0.99  | 37  | 0.96  |   |
| 8092 | Bag4           | -1.03 | 43   | 5.45  | 34  | 5.28  |   |
| 8093 | Bspry          | -1.03 | 7    | 0.34  | 4   | 0.33  |   |
| 8094 | Card9          | -1.03 | 8    | 0.41  | 9   | 0.39  |   |
| 8095 | Ccdc175        | -1.03 | 13   | 0.28  | 8   | 0.27  |   |

Supplemental Table 2  
Vehicle versus FSH, 24 hours

|      | A            | B     | C    | D     | E    | F     | G |
|------|--------------|-------|------|-------|------|-------|---|
| 8096 | Cdca3        | -1.03 | 52   | 10.02 | 34   | 9.71  |   |
| 8097 | Chn3         | -1.03 | 3    | 0.62  | 2    | 0.6   |   |
| 8098 | Cisd2        | -1.03 | 231  | 19.73 | 160  | 19.12 |   |
| 8099 | Cnga2_2      | -1.03 | 3    | 0.22  | 2    | 0.21  |   |
| 8100 | Cntn1        | -1.03 | 6    | 0.19  | 7    | 0.18  |   |
| 8101 | Creb1        | -1.03 | 89   | 19.25 | 87   | 18.65 |   |
| 8102 | Dhrs4        | -1.03 | 55   | 7.63  | 48   | 7.39  |   |
| 8103 | Ebag9        | -1.03 | 72   | 6.61  | 44   | 6.4   |   |
| 8104 | Efr3b        | -1.03 | 16   | 0.76  | 10   | 0.74  |   |
| 8105 | Ehhadh       | -1.03 | 6    | 0.24  | 4    | 0.23  |   |
| 8106 | Esyt3        | -1.03 | 10   | 0.32  | 6    | 0.31  |   |
| 8107 | Fah          | -1.03 | 20   | 2.17  | 13   | 2.1   |   |
| 8108 | Fam166a      | -1.03 | 2    | 0.6   | 2    | 0.58  |   |
| 8109 | Galnt3       | -1.03 | 11   | 0.5   | 6    | 0.48  |   |
| 8110 | Glt8d2       | -1.03 | 6    | 0.71  | 5    | 0.69  |   |
| 8111 | Gtpbp8       | -1.03 | 41   | 1.87  | 29   | 1.81  |   |
| 8112 | Haus1_1      | -1.03 | 0    | 3.57  | 0    | 3.46  |   |
| 8113 | Hddc3        | -1.03 | 26   | 3.78  | 18   | 3.66  |   |
| 8114 | Hist1h2ah    | -1.03 | 2    | 1.9   | 2    | 1.84  |   |
| 8115 | Impa2        | -1.03 | 25   | 1.28  | 8    | 1.24  |   |
| 8116 | Itpk1        | -1.03 | 33   | 2.81  | 28   | 2.72  |   |
| 8117 | Krt222       | -1.03 | 5    | 0.23  | 4    | 0.23  |   |
| 8118 | Lcn12        | -1.03 | 7    | 0.81  | 12   | 0.79  |   |
| 8119 | LOC100910735 | -1.03 | 0    | 0.45  | 0    | 0.44  |   |
| 8120 | LOC100912429 | -1.03 | 0    | 5.5   | 0    | 5.32  |   |
| 8121 | LOC365839    | -1.03 | 1    | 0.6   | 1    | 0.59  |   |
| 8122 | LOC498368    | -1.03 | 3    | 0.29  | 2    | 0.28  |   |
| 8123 | Map3k13      | -1.03 | 155  | 0.4   | 51   | 0.39  |   |
| 8124 | Mfn2         | -1.03 | 0    | 0.33  | 0    | 0.32  |   |
| 8125 | Mfsd8        | -1.03 | 37   | 1.99  | 36   | 1.93  |   |
| 8126 | Mios         | -1.03 | 66   | 3.04  | 38   | 2.95  |   |
| 8127 | Mtfmt        | -1.03 | 57   | 6.88  | 43   | 6.67  |   |
| 8128 | Mturn        | -1.03 | 22   | 1.89  | 13   | 1.84  |   |
| 8129 | Nanp         | -1.03 | 50   | 5.64  | 28   | 5.47  |   |
| 8130 | Ndst3        | -1.03 | 8    | 0.27  | 5    | 0.26  |   |
| 8131 | Nkpd1        | -1.03 | 6    | 0.3   | 2    | 0.29  |   |
| 8132 | Nol3         | -1.03 | 6    | 0.99  | 4    | 0.96  |   |
| 8133 | Nptx1        | -1.03 | 12   | 0.47  | 6    | 0.46  |   |
| 8134 | Nudcd1       | -1.03 | 105  | 6.4   | 71   | 6.2   |   |
| 8135 | Olr621_1     | -1.03 | 2    | 0.82  | 2    | 0.8   |   |
| 8136 | Oraov1       | -1.03 | 11   | 2.23  | 6    | 2.16  |   |
| 8137 | Pak6         | -1.03 | 3    | 0.16  | 6    | 0.15  |   |
| 8138 | Pecr         | -1.03 | 12   | 1.82  | 11   | 1.76  |   |
| 8139 | Plch1        | -1.03 | 10   | 0.22  | 7    | 0.22  |   |
| 8140 | Plekhb1      | -1.03 | 68   | 0.77  | 21   | 0.75  |   |
| 8141 | Plekhf1      | -1.03 | 48   | 8.09  | 32   | 7.84  |   |
| 8142 | Plekhf2      | -1.03 | 85   | 6.55  | 54   | 6.35  |   |
| 8143 | Pole2        | -1.03 | 29   | 3.09  | 21   | 2.99  |   |
| 8144 | Polr2i       | -1.03 | 0    | 5.93  | 0    | 5.75  |   |
| 8145 | Potea        | -1.03 | 3    | 0.14  | 2    | 0.14  |   |
| 8146 | Ppcdc        | -1.03 | 8    | 1.1   | 6    | 1.07  |   |
| 8147 | Prkag1       | -1.03 | 2007 | 23.89 | 1346 | 23.15 |   |
| 8148 | Prkcg        | -1.03 | 15   | 0.48  | 7    | 0.47  |   |
| 8149 | Prrg2        | -1.03 | 6    | 0.52  | 2    | 0.51  |   |

Supplemental Table 2  
Vehicle versus FSH, 24 hours

|      | A            | B     | C    | D      | E    | F      | G |
|------|--------------|-------|------|--------|------|--------|---|
| 8150 | Rdh14        | -1.03 | 14   | 1.6    | 14   | 1.55   |   |
| 8151 | Rem2         | -1.03 | 3    | 0.41   | 3    | 0.4    |   |
| 8152 | RGD1565635   | -1.03 | 3    | 0.45   | 2    | 0.43   |   |
| 8153 | Rmi1         | -1.03 | 81   | 9.39   | 54   | 9.1    |   |
| 8154 | Rnf128       | -1.03 | 4    | 0.23   | 4    | 0.23   |   |
| 8155 | Rp9          | -1.03 | 65   | 5.23   | 45   | 5.07   |   |
| 8156 | Rpl27-l1     | -1.03 | 1    | 1.81   | 1    | 1.76   |   |
| 8157 | Rpl38_1      | -1.03 | 0    | 3.51   | 0    | 3.4    |   |
| 8158 | RT1-N2       | -1.03 | 2    | 0.37   | 2    | 0.36   |   |
| 8159 | RT1-T24-3    | -1.03 | 16   | 0.94   | 10   | 0.91   |   |
| 8160 | Sbf1         | -1.03 | 636  | 23.2   | 419  | 22.47  |   |
| 8161 | Scube2       | -1.03 | 24   | 0.72   | 10   | 0.7    |   |
| 8162 | Slc51a       | -1.03 | 19   | 0.93   | 41   | 0.9    |   |
| 8163 | Sox8         | -1.03 | 4    | 0.23   | 2    | 0.22   |   |
| 8164 | Spata1       | -1.03 | 15   | 0.4    | 11   | 0.39   |   |
| 8165 | Stx1a        | -1.03 | 52   | 2.43   | 40   | 2.35   |   |
| 8166 | Tbkbp1       | -1.03 | 3    | 0.23   | 4    | 0.22   |   |
| 8167 | Tifa         | -1.03 | 18   | 1.68   | 14   | 1.63   |   |
| 8168 | Tigd5        | -1.03 | 18   | 1.78   | 12   | 1.72   |   |
| 8169 | Tsga10ip     | -1.03 | 18   | 0.3    | 23   | 0.29   |   |
| 8170 | Ttll13       | -1.03 | 50   | 0.89   | 64   | 0.86   |   |
| 8171 | Unc13d       | -1.03 | 4    | 0.19   | 3    | 0.18   |   |
| 8172 | Y_RNA_8      | -1.03 | 15   | 36.64  | 10   | 35.5   |   |
| 8173 | Zfp13        | -1.03 | 16   | 1.41   | 16   | 1.36   |   |
| 8174 | Erbp2ip      | -1.03 | 351  | 13.94  | 252  | 13.49  |   |
| 8175 | Glyr1        | -1.03 | 489  | 31.02  | 326  | 29.98  |   |
| 8176 | Trak1        | -1.03 | 325  | 10.72  | 202  | 10.36  |   |
| 8177 | Ankrd13a     | -1.03 | 655  | 41.08  | 408  | 39.7   |   |
| 8178 | Aif1l        | -1.03 | 818  | 62.74  | 553  | 60.62  |   |
| 8179 | Phf5a        | -1.04 | 204  | 51.95  | 132  | 50.18  |   |
| 8180 | Ythdf1       | -1.04 | 420  | 28.73  | 265  | 27.75  |   |
| 8181 | Laptm4a      | -1.04 | 1774 | 227.74 | 1168 | 219.91 |   |
| 8182 | C1galt1      | -1.04 | 165  | 6.32   | 107  | 6.1    |   |
| 8183 | Map4k3       | -1.04 | 261  | 8.7    | 206  | 8.4    |   |
| 8184 | LOC103689945 | -1.04 | 42   | 25.14  | 20   | 24.27  |   |
| 8185 | Mief1        | -1.04 | 185  | 17.13  | 122  | 16.54  |   |
| 8186 | Ice1         | -1.04 | 469  | 14.22  | 287  | 13.73  |   |
| 8187 | Strip1       | -1.04 | 298  | 17.3   | 195  | 16.69  |   |
| 8188 | Fam136a      | -1.04 | 115  | 17.06  | 75   | 16.45  |   |
| 8189 | Cabin1       | -1.04 | 292  | 7.55   | 202  | 7.28   |   |
| 8190 | Ankhd1       | -1.04 | 541  | 11.78  | 395  | 11.36  |   |
| 8191 | P4hb         | -1.04 | 2790 | 274.89 | 1835 | 264.9  |   |
| 8192 | Zcchc6       | -1.04 | 256  | 8.89   | 171  | 8.57   |   |
| 8193 | Pold1        | -1.04 | 103  | 5.53   | 67   | 5.33   |   |
| 8194 | Cyb5b        | -1.04 | 392  | 20.49  | 275  | 19.74  |   |
| 8195 | Dip2b        | -1.04 | 326  | 9.11   | 232  | 8.77   |   |
| 8196 | Pon2         | -1.04 | 77   | 24.85  | 59   | 23.93  |   |
| 8197 | Cnot3        | -1.04 | 291  | 21.65  | 196  | 20.85  |   |
| 8198 | Morf4l2      | -1.04 | 1281 | 163.77 | 860  | 157.72 |   |
| 8199 | Zfyve27      | -1.04 | 196  | 7.74   | 133  | 7.46   |   |
| 8200 | Helz         | -1.04 | 334  | 10.14  | 225  | 9.76   |   |
| 8201 | Ddx47        | -1.04 | 178  | 21.17  | 132  | 20.38  |   |
| 8202 | Nol11        | -1.04 | 233  | 18.51  | 147  | 17.82  |   |
| 8203 | Rps11        | -1.04 | 768  | 304.75 | 484  | 293.32 |   |



Supplemental Table 2  
Vehicle versus FSH, 24 hours

|      | A            | B     | C    | D       | E    | F       | G |
|------|--------------|-------|------|---------|------|---------|---|
| 8204 | Mapk6        | -1.04 | 321  | 18.21   | 218  | 17.53   |   |
| 8205 | Hiatl1       | -1.04 | 248  | 17.84   | 157  | 17.17   |   |
| 8206 | Luc7l2       | -1.04 | 597  | 21.46   | 442  | 20.65   |   |
| 8207 | Zfp827       | -1.04 | 249  | 11.76   | 167  | 11.32   |   |
| 8208 | Gclm         | -1.04 | 90   | 12.41   | 61   | 11.94   |   |
| 8209 | Ap4e1        | -1.04 | 121  | 5.08    | 76   | 4.89    |   |
| 8210 | Psmc1        | -1.04 | 793  | 59.66   | 529  | 57.4    |   |
| 8211 | Mrpl14       | -1.04 | 82   | 20.01   | 55   | 19.25   |   |
| 8212 | Akt1s1       | -1.04 | 179  | 21.43   | 124  | 20.61   |   |
| 8213 | Bcl7c        | -1.04 | 77   | 17.18   | 48   | 16.52   |   |
| 8214 | ldh3a        | -1.04 | 280  | 26.64   | 185  | 25.61   |   |
| 8215 | LOC100363782 | -1.04 | 350  | 43.84   | 227  | 42.15   |   |
| 8216 | Cyc1         | -1.04 | 328  | 65.89   | 216  | 63.32   |   |
| 8217 | Kctd5        | -1.04 | 135  | 12.19   | 91   | 11.71   |   |
| 8218 | Prmt10       | -1.04 | 152  | 10.92   | 126  | 10.49   |   |
| 8219 | Phf8         | -1.04 | 537  | 20.92   | 338  | 20.1    |   |
| 8220 | Msl1         | -1.04 | 337  | 21.59   | 205  | 20.74   |   |
| 8221 | Skiv2l2      | -1.04 | 290  | 15.73   | 195  | 15.11   |   |
| 8222 | Bcl10        | -1.04 | 136  | 17.53   | 93   | 16.83   |   |
| 8223 | Dsel         | -1.04 | 109  | 6.75    | 71   | 6.48    |   |
| 8224 | Trim28       | -1.04 | 1238 | 103.81  | 796  | 99.63   |   |
| 8225 | Tmem127      | -1.04 | 391  | 24.6    | 270  | 23.61   |   |
| 8226 | Pola2        | -1.04 | 77   | 5.01    | 40   | 4.81    |   |
| 8227 | Aarsd1       | -1.04 | 72   | 4       | 42   | 3.83    |   |
| 8228 | Cep89        | -1.04 | 59   | 4.59    | 51   | 4.41    |   |
| 8229 | Rplp1_1      | -1.04 | 2653 | 2178.69 | 1704 | 2090.66 |   |
| 8230 | Cbx1         | -1.04 | 138  | 45.99   | 75   | 44.12   |   |
| 8231 | Supt20       | -1.04 | 299  | 18.3    | 219  | 17.55   |   |
| 8232 | Rbm34        | -1.04 | 84   | 4.35    | 55   | 4.17    |   |
| 8233 | Pcdhgb5      | -1.04 | 45   | 4.89    | 29   | 4.68    |   |
| 8234 | Trappc8      | -1.04 | 288  | 11.06   | 189  | 10.6    |   |
| 8235 | Fancm        | -1.04 | 128  | 3.46    | 88   | 3.31    |   |
| 8236 | Cdc6         | -1.04 | 50   | 3.59    | 30   | 3.44    |   |
| 8237 | Fem1c        | -1.04 | 196  | 6.48    | 121  | 6.2     |   |
| 8238 | Rgp1         | -1.04 | 197  | 9.11    | 150  | 8.73    |   |
| 8239 | Evi5l        | -1.04 | 65   | 5.51    | 50   | 5.28    |   |
| 8240 | Pard6g       | -1.04 | 124  | 7.76    | 86   | 7.43    |   |
| 8241 | Pick1        | -1.04 | 65   | 6       | 49   | 5.74    |   |
| 8242 | Aff1         | -1.04 | 283  | 11.02   | 202  | 10.55   |   |
| 8243 | Tcea1_2      | -1.04 | 109  | 27.26   | 80   | 26.1    |   |
| 8244 | St5          | -1.04 | 576  | 22.29   | 352  | 21.34   |   |
| 8245 | Bag3         | -1.04 | 194  | 17.47   | 119  | 16.72   |   |
| 8246 | Pgpep1       | -1.04 | 94   | 12.66   | 65   | 12.12   |   |
| 8247 | Slc38a2      | -1.04 | 1727 | 86.5    | 1107 | 82.8    |   |
| 8248 | Chaf1b       | -1.05 | 52   | 5.02    | 36   | 4.81    |   |
| 8249 | Bcl2l12      | -1.05 | 87   | 6.04    | 54   | 5.78    |   |
| 8250 | Kdm5a        | -1.05 | 710  | 14.36   | 474  | 13.74   |   |
| 8251 | Hspbp1       | -1.05 | 186  | 27.86   | 125  | 26.65   |   |
| 8252 | Tmem115      | -1.05 | 166  | 18.33   | 109  | 17.53   |   |
| 8253 | Wdr37        | -1.05 | 232  | 9.21    | 141  | 8.81    |   |
| 8254 | Cyth3        | -1.05 | 87   | 5.03    | 63   | 4.81    |   |
| 8255 | RGD1559904   | -1.05 | 361  | 13.72   | 242  | 13.13   |   |
| 8256 | Casp8ap2     | -1.05 | 130  | 3.96    | 83   | 3.78    |   |
| 8257 | Ncoa6        | -1.05 | 445  | 14.48   | 293  | 13.85   |   |

Supplemental Table 2  
Vehicle versus FSH, 24 hours

|      | A          | B     | C    | D      | E   | F      | G |
|------|------------|-------|------|--------|-----|--------|---|
| 8258 | Rps2_2     | -1.05 | 53   | 427.99 | 77  | 409.28 |   |
| 8259 | Man1a2     | -1.05 | 187  | 11.1   | 126 | 10.62  |   |
| 8260 | Mrfap1_2   | -1.05 | 590  | 111.11 | 416 | 106.24 |   |
| 8261 | Hnrnpul2   | -1.05 | 377  | 33.66  | 243 | 32.18  |   |
| 8262 | Cox16      | -1.05 | 50   | 12.3   | 40  | 11.76  |   |
| 8263 | Tmem136    | -1.05 | 126  | 8.56   | 78  | 8.18   |   |
| 8264 | Eif2a      | -1.05 | 155  | 12.81  | 108 | 12.25  |   |
| 8265 | Nudt19     | -1.05 | 45   | 6.59   | 29  | 6.3    |   |
| 8266 | P3h2       | -1.05 | 58   | 4.49   | 38  | 4.29   |   |
| 8267 | Trnau1ap   | -1.05 | 87   | 4.26   | 52  | 4.07   |   |
| 8268 | Kars       | -1.05 | 433  | 47.93  | 285 | 45.81  |   |
| 8269 | Phf2       | -1.05 | 456  | 19.84  | 311 | 18.97  |   |
| 8270 | Al314180   | -1.05 | 578  | 22.42  | 368 | 21.43  |   |
| 8271 | Mkrm2      | -1.05 | 125  | 12.52  | 89  | 11.97  |   |
| 8272 | Wdr12      | -1.05 | 112  | 12.84  | 62  | 12.26  |   |
| 8273 | Prpf40a    | -1.05 | 382  | 22.65  | 251 | 21.64  |   |
| 8274 | Ranbp9     | -1.05 | 199  | 12.98  | 168 | 12.4   |   |
| 8275 | Rmnd5a     | -1.05 | 152  | 20.7   | 98  | 19.77  |   |
| 8276 | Gosr1      | -1.05 | 297  | 14.66  | 213 | 14     |   |
| 8277 | Pip5k1a    | -1.05 | 391  | 23.03  | 273 | 22     |   |
| 8278 | Gtf2e2     | -1.05 | 106  | 11.59  | 72  | 11.07  |   |
| 8279 | Thap4      | -1.05 | 131  | 13.57  | 102 | 12.96  |   |
| 8280 | LOC361985  | -1.05 | 291  | 37.55  | 193 | 35.85  |   |
| 8281 | Fzd6       | -1.05 | 251  | 12.27  | 162 | 11.72  |   |
| 8282 | Rtel1      | -1.05 | 216  | 9.78   | 145 | 9.34   |   |
| 8283 | LOC688176  | -1.05 | 110  | 10.85  | 71  | 10.36  |   |
| 8284 | Uqcc1      | -1.05 | 171  | 10.48  | 115 | 10.01  |   |
| 8285 | Gnai1      | -1.05 | 160  | 16.95  | 96  | 16.17  |   |
| 8286 | Sdhaf2     | -1.05 | 112  | 13.3   | 82  | 12.69  |   |
| 8287 | Rbm25l1    | -1.05 | 198  | 18.99  | 140 | 18.12  |   |
| 8288 | Atp6v0b    | -1.05 | 197  | 47.6   | 136 | 45.39  |   |
| 8289 | Erp29      | -1.05 | 190  | 25.93  | 135 | 24.73  |   |
| 8290 | Rnf25      | -1.05 | 142  | 14.94  | 86  | 14.25  |   |
| 8291 | Rnf7       | -1.05 | 118  | 19.04  | 86  | 18.16  |   |
| 8292 | Brd4       | -1.05 | 984  | 28.89  | 635 | 27.55  |   |
| 8293 | Ddx6       | -1.05 | 650  | 49.69  | 441 | 47.37  |   |
| 8294 | Reps1      | -1.05 | 177  | 16.56  | 128 | 15.79  |   |
| 8295 | Ppp6c      | -1.05 | 217  | 25.62  | 153 | 24.43  |   |
| 8296 | Abcf2      | -1.05 | 214  | 21.27  | 148 | 20.28  |   |
| 8297 | Crip2      | -1.05 | 126  | 26.99  | 80  | 25.73  |   |
| 8298 | Kat6a      | -1.05 | 572  | 15.31  | 376 | 14.6   |   |
| 8299 | Hace1      | -1.05 | 143  | 6.73   | 107 | 6.42   |   |
| 8300 | Rad21      | -1.05 | 789  | 53.95  | 510 | 51.42  |   |
| 8301 | Gnpnat1    | -1.05 | 122  | 8.81   | 72  | 8.39   |   |
| 8302 | Bloc1s6    | -1.05 | 70   | 4.37   | 56  | 4.16   |   |
| 8303 | RGD1306926 | -1.05 | 66   | 2.88   | 48  | 2.75   |   |
| 8304 | Serinc5    | -1.05 | 1515 | 61.92  | 948 | 58.99  |   |
| 8305 | Numa1      | -1.05 | 1264 | 38.18  | 824 | 36.37  |   |
| 8306 | Pcmt1      | -1.05 | 145  | 26.23  | 96  | 24.98  |   |
| 8307 | Tcof1      | -1.05 | 231  | 12.43  | 158 | 11.84  |   |
| 8308 | Xpo4       | -1.05 | 206  | 4.78   | 133 | 4.55   |   |
| 8309 | Tnrc18     | -1.05 | 1348 | 27.98  | 891 | 26.64  |   |
| 8310 | Tbc1d15    | -1.05 | 326  | 20.41  | 215 | 19.43  |   |
| 8311 | Fam126a    | -1.05 | 238  | 5.6    | 267 | 5.33   |   |

Supplemental Table 2  
Vehicle versus FSH, 24 hours

|      | A              | B     | C    | D      | E    | F      | G |
|------|----------------|-------|------|--------|------|--------|---|
| 8312 | Ssbp1          | -1.05 | 40   | 9.95   | 36   | 9.48   |   |
| 8313 | Cep5711        | -1.05 | 56   | 3.1    | 40   | 2.95   |   |
| 8314 | Cyp4v3         | -1.05 | 30   | 1.97   | 21   | 1.87   |   |
| 8315 | Dpcd           | -1.05 | 38   | 8.21   | 33   | 7.82   |   |
| 8316 | Ano6           | -1.05 | 744  | 25.44  | 486  | 24.21  |   |
| 8317 | Seh1l          | -1.05 | 454  | 5.28   | 301  | 5.03   |   |
| 8318 | Wbp5           | -1.05 | 1460 | 365.51 | 950  | 347.77 |   |
| 8319 | Tssc1          | -1.05 | 113  | 13.29  | 75   | 12.64  |   |
| 8320 | Ube2m          | -1.05 | 514  | 63.59  | 340  | 60.5   |   |
| 8321 | Akap11         | -1.05 | 326  | 8.29   | 221  | 7.88   |   |
| 8322 | Cenpj          | -1.05 | 99   | 5.14   | 76   | 4.89   |   |
| 8323 | Mrrf           | -1.05 | 92   | 5.65   | 61   | 5.37   |   |
| 8324 | Gnl3l          | -1.05 | 313  | 16.04  | 204  | 15.25  |   |
| 8325 | Stoml2         | -1.05 | 117  | 20.6   | 78   | 19.59  |   |
| 8326 | Pom121         | -1.05 | 383  | 16.88  | 254  | 16.05  |   |
| 8327 | Tatdn2         | -1.05 | 142  | 11.53  | 96   | 10.96  |   |
| 8328 | Pds5b          | -1.05 | 434  | 10.39  | 278  | 9.88   |   |
| 8329 | Ranbp2         | -1.05 | 677  | 18.35  | 462  | 17.44  |   |
| 8330 | Pcdhb3         | -1.05 | 26   | 2.54   | 16   | 2.41   |   |
| 8331 | Tbcb           | -1.05 | 0    | 11.96  | 0    | 11.37  |   |
| 8332 | AABR07058985.1 | -1.05 | 26   | 6.35   | 19   | 6.03   |   |
| 8333 | Hdac6_2        | -1.05 | 0    | 1.87   | 0    | 1.77   |   |
| 8334 | Nphp3          | -1.05 | 67   | 2.94   | 52   | 2.79   |   |
| 8335 | Farsa          | -1.05 | 255  | 31.68  | 174  | 30.09  |   |
| 8336 | Cisd1          | -1.05 | 129  | 34.62  | 86   | 32.87  |   |
| 8337 | Mrpl27         | -1.05 | 83   | 26.93  | 58   | 25.56  |   |
| 8338 | Cnih4          | -1.05 | 285  | 33.22  | 176  | 31.53  |   |
| 8339 | Eif4g3         | -1.05 | 676  | 24.02  | 459  | 22.8   |   |
| 8340 | LOC103690317   | -1.05 | 84   | 35.32  | 51   | 33.51  |   |
| 8341 | AABR07027575.1 | -1.05 | 121  | 79.13  | 84   | 75.07  |   |
| 8342 | Rab28          | -1.05 | 171  | 17.88  | 126  | 16.97  |   |
| 8343 | Ist1           | -1.05 | 251  | 29.2   | 183  | 27.7   |   |
| 8344 | RGD1311345     | -1.05 | 144  | 9.27   | 86   | 8.79   |   |
| 8345 | Sdhc           | -1.05 | 418  | 82.48  | 270  | 78.22  |   |
| 8346 | Fyco1          | -1.05 | 262  | 6.73   | 190  | 6.38   |   |
| 8347 | Cdc25a         | -1.05 | 199  | 11.95  | 136  | 11.33  |   |
| 8348 | Arhgef40       | -1.05 | 275  | 9.49   | 180  | 9      |   |
| 8349 | Dync1h1        | -1.06 | 2882 | 51.94  | 1954 | 49.23  |   |
| 8350 | Ado            | -1.06 | 23   | 4.91   | 15   | 4.65   |   |
| 8351 | Snupn          | -1.06 | 157  | 4.3    | 93   | 4.07   |   |
| 8352 | AABR07069282.1 | -1.06 | 14   | 1.83   | 10   | 1.74   |   |
| 8353 | Cep162         | -1.06 | 39   | 0.97   | 27   | 0.92   |   |
| 8354 | Magee1         | -1.06 | 23   | 1.61   | 15   | 1.52   |   |
| 8355 | Tesk1          | -1.06 | 162  | 11.17  | 107  | 10.58  |   |
| 8356 | Brcc3          | -1.06 | 108  | 11.09  | 73   | 10.5   |   |
| 8357 | Mvp            | -1.06 | 175  | 12.07  | 131  | 11.43  |   |
| 8358 | Mecp2          | -1.06 | 103  | 9.27   | 75   | 8.78   |   |
| 8359 | Zbtb10         | -1.06 | 85   | 3.48   | 60   | 3.3    |   |
| 8360 | Pabpc4         | -1.06 | 358  | 43.52  | 245  | 41.19  |   |
| 8361 | Nmt1           | -1.06 | 458  | 41.49  | 288  | 39.26  |   |
| 8362 | Cnppd1         | -1.06 | 234  | 24.21  | 148  | 22.91  |   |
| 8363 | Cwf19l1        | -1.06 | 110  | 9.28   | 89   | 8.78   |   |
| 8364 | Dph3           | -1.06 | 83   | 6.61   | 59   | 6.25   |   |
| 8365 | Pdss2          | -1.06 | 145  | 5.17   | 107  | 4.89   |   |

Supplemental Table 2  
Vehicle versus FSH, 24 hours

|      | A              | B     | C    | D      | E    | F      | G |
|------|----------------|-------|------|--------|------|--------|---|
| 8366 | Sp3            | -1.06 | 263  | 27.3   | 183  | 25.83  |   |
| 8367 | Csde1          | -1.06 | 224  | 74.66  | 190  | 70.61  |   |
| 8368 | Dopey1         | -1.06 | 208  | 4.08   | 146  | 3.86   |   |
| 8369 | LOC683674      | -1.06 | 85   | 7.55   | 54   | 7.14   |   |
| 8370 | Rfc5           | -1.06 | 86   | 7.5    | 53   | 7.1    |   |
| 8371 | Tom1l2         | -1.06 | 338  | 14.33  | 233  | 13.55  |   |
| 8372 | Ctnnd1         | -1.06 | 1528 | 67.74  | 1009 | 64.05  |   |
| 8373 | Psmb1          | -1.06 | 444  | 92.15  | 290  | 87.13  |   |
| 8374 | Prdm15         | -1.06 | 107  | 3.14   | 65   | 2.97   |   |
| 8375 | Mif            | -1.06 | 172  | 147.49 | 117  | 139.42 |   |
| 8376 | Tmem87a        | -1.06 | 191  | 6.68   | 140  | 6.31   |   |
| 8377 | Tmed9          | -1.06 | 520  | 91.04  | 336  | 86.03  |   |
| 8378 | Ovca2          | -1.06 | 13   | 1.7    | 8    | 1.6    |   |
| 8379 | Kmt2c          | -1.06 | 32   | 9.69   | 25   | 9.15   |   |
| 8380 | Prpf6          | -1.06 | 440  | 29.13  | 291  | 27.52  |   |
| 8381 | Rfxap_2        | -1.06 | 0    | 3.01   | 0    | 2.85   |   |
| 8382 | Usp4           | -1.06 | 415  | 20.68  | 254  | 19.54  |   |
| 8383 | Zfp319         | -1.06 | 90   | 8.86   | 60   | 8.37   |   |
| 8384 | Igf2r          | -1.06 | 1716 | 16.84  | 631  | 15.91  |   |
| 8385 | C2cd3          | -1.06 | 236  | 6.86   | 154  | 6.48   |   |
| 8386 | Tsc1           | -1.06 | 187  | 8.95   | 119  | 8.45   |   |
| 8387 | Cd164          | -1.06 | 775  | 66.06  | 500  | 62.36  |   |
| 8388 | Ciapi1         | -1.06 | 109  | 13.06  | 78   | 12.32  |   |
| 8389 | Zdhc17         | -1.06 | 127  | 6.65   | 126  | 6.27   |   |
| 8390 | Atp5g3         | -1.06 | 483  | 164.39 | 312  | 155.1  |   |
| 8391 | Lrpprc         | -1.06 | 308  | 14.28  | 209  | 13.47  |   |
| 8392 | Pnkp           | -1.06 | 65   | 7.42   | 41   | 7      |   |
| 8393 | Trim21         | -1.06 | 70   | 3.48   | 46   | 3.28   |   |
| 8394 | Pcsk7          | -1.06 | 286  | 8.21   | 113  | 7.74   |   |
| 8395 | Dgcr14         | -1.06 | 16   | 5.34   | 13   | 5.03   |   |
| 8396 | Ift74          | -1.06 | 66   | 4.37   | 35   | 4.12   |   |
| 8397 | Mmd            | -1.06 | 84   | 6.35   | 57   | 5.98   |   |
| 8398 | Ubl5           | -1.06 | 142  | 68.88  | 91   | 64.91  |   |
| 8399 | Ppp1r15b       | -1.06 | 442  | 20.27  | 282  | 19.1   |   |
| 8400 | Fam134b_1      | -1.06 | 83   | 10.62  | 71   | 10.01  |   |
| 8401 | Zfp318         | -1.06 | 220  | 6.59   | 164  | 6.2    |   |
| 8402 | Elmo2          | -1.06 | 187  | 23.82  | 157  | 22.43  |   |
| 8403 | Rfwd2          | -1.06 | 295  | 16.95  | 201  | 15.96  |   |
| 8404 | Epb4.1l5       | -1.06 | 137  | 7.37   | 81   | 6.94   |   |
| 8405 | Ghitm          | -1.06 | 368  | 63.23  | 233  | 59.53  |   |
| 8406 | Rlf            | -1.06 | 220  | 7.8    | 148  | 7.34   |   |
| 8407 | AABR07066142.1 | -1.06 | 0    | 8.11   | 0    | 7.63   |   |
| 8408 | Cacna2d2       | -1.06 | 26   | 0.89   | 22   | 0.84   |   |
| 8409 | Cdc14b         | -1.06 | 365  | 8.56   | 245  | 8.05   |   |
| 8410 | Coa5           | -1.06 | 216  | 17.52  | 137  | 16.47  |   |
| 8411 | Dck            | -1.06 | 23   | 3.62   | 14   | 3.41   |   |
| 8412 | Mkx            | -1.06 | 39   | 6.37   | 27   | 5.99   |   |
| 8413 | Ncapg          | -1.06 | 59   | 2.53   | 42   | 2.38   |   |
| 8414 | Npm3           | -1.06 | 56   | 24.34  | 43   | 22.89  |   |
| 8415 | Pgm2           | -1.06 | 82   | 8.04   | 50   | 7.56   |   |
| 8416 | Tnfrsf10b      | -1.06 | 25   | 2.03   | 14   | 1.91   |   |
| 8417 | Zak            | -1.06 | 93   | 10.64  | 67   | 10.01  |   |
| 8418 | Zbtb7a         | -1.06 | 177  | 11.99  | 102  | 11.27  |   |
| 8419 | Gpbp1          | -1.06 | 262  | 15.15  | 180  | 14.24  |   |

Supplemental Table 2  
Vehicle versus FSH, 24 hours

|      | A          | B     | C    | D      | E    | F      | G |
|------|------------|-------|------|--------|------|--------|---|
| 8420 | Manbal     | -1.06 | 179  | 38.42  | 125  | 36.11  |   |
| 8421 | Pkm_1      | -1.06 | 630  | 319.61 | 410  | 300.31 |   |
| 8422 | Topors     | -1.06 | 261  | 14.13  | 164  | 13.28  |   |
| 8423 | Zcchc8     | -1.06 | 181  | 9.27   | 123  | 8.71   |   |
| 8424 | Kansl3     | -1.06 | 415  | 19.95  | 286  | 18.75  |   |
| 8425 | Smg8       | -1.06 | 92   | 5.46   | 60   | 5.13   |   |
| 8426 | Bub1       | -1.07 | 69   | 3.6    | 46   | 3.38   |   |
| 8427 | Klhl5      | -1.07 | 84   | 4.7    | 57   | 4.42   |   |
| 8428 | Cox8a      | -1.07 | 317  | 155.04 | 203  | 145.56 |   |
| 8429 | Rraga      | -1.07 | 226  | 35.26  | 146  | 33.1   |   |
| 8430 | Fam149a    | -1.07 | 57   | 2.19   | 45   | 2.06   |   |
| 8431 | Tbc1d7     | -1.07 | 43   | 8.76   | 35   | 8.22   |   |
| 8432 | Reep5      | -1.07 | 454  | 36.6   | 294  | 34.33  |   |
| 8433 | Cd9        | -1.07 | 663  | 125.5  | 416  | 117.72 |   |
| 8434 | Zfp330     | -1.07 | 110  | 9.64   | 71   | 9.04   |   |
| 8435 | Aftph      | -1.07 | 237  | 12.23  | 171  | 11.47  |   |
| 8436 | Chmp7      | -1.07 | 147  | 13.99  | 95   | 13.11  |   |
| 8437 | Dmpk       | -1.07 | 90   | 2.78   | 48   | 2.61   |   |
| 8438 | Tmem173    | -1.07 | 63   | 7.57   | 42   | 7.1    |   |
| 8439 | Gucy1b3    | -1.07 | 65   | 4.81   | 46   | 4.51   |   |
| 8440 | Ywhag      | -1.07 | 1621 | 113.04 | 1054 | 105.96 |   |
| 8441 | Fhod1      | -1.07 | 154  | 8.12   | 101  | 7.61   |   |
| 8442 | Bok        | -1.07 | 537  | 72.08  | 352  | 67.5   |   |
| 8443 | Prr36      | -1.07 | 52   | 3.46   | 32   | 3.24   |   |
| 8444 | Pfkfb3     | -1.07 | 121  | 5.49   | 77   | 5.14   |   |
| 8445 | Rc3h2      | -1.07 | 500  | 20.49  | 346  | 19.18  |   |
| 8446 | Gng5_2     | -1.07 | 62   | 23.61  | 49   | 22.09  |   |
| 8447 | Il17ra     | -1.07 | 180  | 10.37  | 106  | 9.7    |   |
| 8448 | Gpd2       | -1.07 | 168  | 7.03   | 116  | 6.57   |   |
| 8449 | Taldo1     | -1.07 | 223  | 43.51  | 149  | 40.69  |   |
| 8450 | Golga5     | -1.07 | 141  | 11.14  | 104  | 10.42  |   |
| 8451 | Med12      | -1.07 | 151  | 8.13   | 126  | 7.6    |   |
| 8452 | Arcn1      | -1.07 | 892  | 62.24  | 577  | 58.19  |   |
| 8453 | Csnk2a2    | -1.07 | 327  | 28.07  | 222  | 26.24  |   |
| 8454 | Xpo1       | -1.07 | 595  | 31.57  | 396  | 29.5   |   |
| 8455 | Dennd1a    | -1.07 | 367  | 5.24   | 271  | 4.9    |   |
| 8456 | Dpm1       | -1.07 | 87   | 4.56   | 54   | 4.26   |   |
| 8457 | Kif4a      | -1.07 | 49   | 2.22   | 26   | 2.07   |   |
| 8458 | Klhl18     | -1.07 | 96   | 5.84   | 71   | 5.45   |   |
| 8459 | Nhlrc2     | -1.07 | 310  | 8.41   | 214  | 7.85   |   |
| 8460 | Ociad2     | -1.07 | 16   | 8.81   | 10   | 8.23   |   |
| 8461 | Sdf2l1     | -1.07 | 44   | 9.84   | 29   | 9.19   |   |
| 8462 | Tapt1      | -1.07 | 177  | 10.24  | 118  | 9.56   |   |
| 8463 | Wdr5b      | -1.07 | 14   | 1.88   | 9    | 1.76   |   |
| 8464 | Wrap73     | -1.07 | 81   | 5.08   | 43   | 4.74   |   |
| 8465 | LOC498154  | -1.07 | 37   | 2.42   | 48   | 2.26   |   |
| 8466 | Mtbp       | -1.07 | 59   | 3.18   | 42   | 2.97   |   |
| 8467 | Tgm4       | -1.07 | 43   | 2.42   | 30   | 2.26   |   |
| 8468 | Rragc      | -1.07 | 259  | 23.21  | 164  | 21.67  |   |
| 8469 | Ywhab      | -1.07 | 872  | 77.68  | 544  | 72.52  |   |
| 8470 | RGD1561149 | -1.07 | 103  | 4.58   | 62   | 4.27   |   |
| 8471 | Nit2       | -1.07 | 110  | 19.63  | 82   | 18.31  |   |
| 8472 | Hnrrnpl    | -1.07 | 1311 | 138.56 | 838  | 129.25 |   |
| 8473 | Pogk       | -1.07 | 416  | 13.42  | 261  | 12.52  |   |

Supplemental Table 2  
Vehicle versus FSH, 24 hours

|      | A              | B     | C    | D      | E    | F      | G |
|------|----------------|-------|------|--------|------|--------|---|
| 8474 | Actr10         | -1.07 | 185  | 27.96  | 113  | 26.06  |   |
| 8475 | Atf7           | -1.07 | 229  | 11.88  | 165  | 11.08  |   |
| 8476 | Cwf19l2        | -1.07 | 69   | 1.99   | 61   | 1.85   |   |
| 8477 | LOC100911774   | -1.07 | 0    | 13.29  | 0    | 12.38  |   |
| 8478 | Zfp212         | -1.07 | 63   | 8.93   | 39   | 8.32   |   |
| 8479 | Fam91a1        | -1.07 | 478  | 19.92  | 312  | 18.57  |   |
| 8480 | Arfrp1         | -1.07 | 102  | 24.05  | 66   | 22.42  |   |
| 8481 | Kif7           | -1.07 | 103  | 5.69   | 70   | 5.31   |   |
| 8482 | Actr8          | -1.07 | 192  | 20.62  | 126  | 19.21  |   |
| 8483 | Comt           | -1.07 | 238  | 25.89  | 143  | 24.12  |   |
| 8484 | lpmk           | -1.07 | 110  | 3.61   | 68   | 3.36   |   |
| 8485 | Sipa1l2        | -1.07 | 326  | 10.16  | 222  | 9.47   |   |
| 8486 | Btbd10         | -1.07 | 156  | 11.88  | 115  | 11.07  |   |
| 8487 | Mast3          | -1.07 | 80   | 3.21   | 55   | 2.99   |   |
| 8488 | Map3k4         | -1.07 | 307  | 12.44  | 202  | 11.58  |   |
| 8489 | Plekhh3        | -1.07 | 66   | 5.34   | 45   | 4.97   |   |
| 8490 | Oser1          | -1.07 | 158  | 17.52  | 86   | 16.31  |   |
| 8491 | Rpl28          | -1.07 | 509  | 127.11 | 369  | 118.25 |   |
| 8492 | Lonp2          | -1.07 | 372  | 16.81  | 240  | 15.64  |   |
| 8493 | Bzw1           | -1.08 | 607  | 87.64  | 371  | 81.5   |   |
| 8494 | Glo1           | -1.08 | 135  | 29.8   | 92   | 27.72  |   |
| 8495 | Lin54          | -1.08 | 92   | 4.33   | 63   | 4.03   |   |
| 8496 | LOC100910990   | -1.08 | 0    | 7.13   | 0    | 6.63   |   |
| 8497 | Purg           | -1.08 | 25   | 4.29   | 16   | 3.99   |   |
| 8498 | Scfd2          | -1.08 | 50   | 2.67   | 37   | 2.48   |   |
| 8499 | Spire1         | -1.08 | 145  | 4.46   | 91   | 4.15   |   |
| 8500 | Timm13         | -1.08 | 75   | 23.21  | 50   | 21.59  |   |
| 8501 | Zfp105         | -1.08 | 79   | 6.21   | 57   | 5.78   |   |
| 8502 | RGD1306941     | -1.08 | 25   | 2.1    | 20   | 1.95   |   |
| 8503 | Atrx           | -1.08 | 443  | 8.19   | 316  | 7.62   |   |
| 8504 | Amd1           | -1.08 | 308  | 21.38  | 193  | 19.87  |   |
| 8505 | Mta1           | -1.08 | 517  | 34.57  | 317  | 32.13  |   |
| 8506 | Xpnpep1        | -1.08 | 565  | 50.62  | 379  | 47.05  |   |
| 8507 | Canx           | -1.08 | 2971 | 144.47 | 1879 | 134.27 |   |
| 8508 | Cdkn1a         | -1.08 | 284  | 32.97  | 177  | 30.64  |   |
| 8509 | Zfp598         | -1.08 | 293  | 20.47  | 180  | 19.02  |   |
| 8510 | Snx13          | -1.08 | 138  | 7.24   | 91   | 6.72   |   |
| 8511 | Mga            | -1.08 | 393  | 9.62   | 266  | 8.94   |   |
| 8512 | Prr13          | -1.08 | 642  | 152.2  | 387  | 141.35 |   |
| 8513 | Bin1           | -1.08 | 236  | 13.11  | 164  | 12.17  |   |
| 8514 | Plscr4         | -1.08 | 220  | 11.15  | 148  | 10.36  |   |
| 8515 | Anapc10        | -1.08 | 55   | 4.84   | 39   | 4.5    |   |
| 8516 | Ccdc43         | -1.08 | 79   | 7.86   | 50   | 7.3    |   |
| 8517 | Edrf1          | -1.08 | 97   | 3.31   | 76   | 3.07   |   |
| 8518 | Pphln1         | -1.08 | 309  | 9.23   | 221  | 8.57   |   |
| 8519 | Phf12          | -1.08 | 318  | 12.58  | 208  | 11.67  |   |
| 8520 | AABR07021704.1 | -1.08 | 57   | 4.42   | 41   | 4.1    |   |
| 8521 | Cyp1b1         | -1.08 | 50   | 2.13   | 30   | 1.98   |   |
| 8522 | Plcd3          | -1.08 | 60   | 3.99   | 33   | 3.7    |   |
| 8523 | Snd1           | -1.08 | 1016 | 64.53  | 655  | 59.85  |   |
| 8524 | Dnmt1          | -1.08 | 552  | 21.77  | 358  | 20.19  |   |
| 8525 | Fh             | -1.08 | 155  | 22.14  | 101  | 20.53  |   |
| 8526 | Timm10         | -1.08 | 50   | 11.09  | 31   | 10.29  |   |
| 8527 | Zfp628         | -1.08 | 54   | 3.83   | 37   | 3.55   |   |

Supplemental Table 2  
Vehicle versus FSH, 24 hours

|      | A              | B     | C    | D      | E   | F     | G |
|------|----------------|-------|------|--------|-----|-------|---|
| 8528 | Mical3         | -1.08 | 360  | 10.55  | 250 | 9.78  |   |
| 8529 | Apmap          | -1.08 | 113  | 10.9   | 79  | 10.11 |   |
| 8530 | Cox20          | -1.08 | 139  | 14.06  | 102 | 13.03 |   |
| 8531 | Gmpr2          | -1.08 | 81   | 5.75   | 58  | 5.33  |   |
| 8532 | Sae1           | -1.08 | 568  | 38.72  | 366 | 35.89 |   |
| 8533 | Cct3           | -1.08 | 816  | 95.77  | 516 | 88.75 |   |
| 8534 | Ube2g2         | -1.08 | 190  | 17.93  | 108 | 16.61 |   |
| 8535 | Eif3m          | -1.08 | 317  | 57.16  | 203 | 52.96 |   |
| 8536 | Shroom2        | -1.08 | 192  | 5.41   | 131 | 5.01  |   |
| 8537 | Anapc5         | -1.08 | 1161 | 104.46 | 776 | 96.73 |   |
| 8538 | Mapk7          | -1.08 | 3    | 5.25   | 5   | 4.86  |   |
| 8539 | Tma7           | -1.08 | 41   | 58.52  | 18  | 54.17 |   |
| 8540 | Xpr1           | -1.08 | 177  | 12.37  | 114 | 11.46 |   |
| 8541 | Pank4          | -1.08 | 173  | 11.38  | 108 | 10.54 |   |
| 8542 | LOC100910882   | -1.08 | 51   | 68.1   | 51  | 63.03 |   |
| 8543 | Mink1          | -1.08 | 333  | 14.4   | 217 | 13.33 |   |
| 8544 | Acaca          | -1.08 | 370  | 11.51  | 238 | 10.66 |   |
| 8545 | Rps6ka4        | -1.08 | 171  | 12.55  | 111 | 11.62 |   |
| 8546 | Pkn2           | -1.08 | 605  | 21.36  | 404 | 19.77 |   |
| 8547 | Irf3           | -1.08 | 272  | 28.99  | 184 | 26.83 |   |
| 8548 | Rnps1          | -1.08 | 549  | 71.93  | 352 | 66.57 |   |
| 8549 | Sfswap         | -1.08 | 406  | 13.35  | 287 | 12.35 |   |
| 8550 | Eif2s3         | -1.08 | 550  | 29.79  | 354 | 27.56 |   |
| 8551 | Tbl1x          | -1.08 | 730  | 31.75  | 480 | 29.38 |   |
| 8552 | Cab39          | -1.08 | 475  | 26.14  | 303 | 24.18 |   |
| 8553 | AABR07036374.1 | -1.08 | 13   | 1.86   | 12  | 1.72  |   |
| 8554 | AABR07064061.1 | -1.08 | 44   | 11.47  | 26  | 10.6  |   |
| 8555 | Cd83           | -1.08 | 12   | 1.29   | 10  | 1.2   |   |
| 8556 | LOC683897      | -1.08 | 28   | 2.26   | 33  | 2.09  |   |
| 8557 | Msl2           | -1.08 | 117  | 9.71   | 72  | 8.98  |   |
| 8558 | Nfkbiz         | -1.08 | 12   | 0.68   | 14  | 0.63  |   |
| 8559 | P2rx7          | -1.08 | 14   | 0.72   | 8   | 0.66  |   |
| 8560 | Pigb           | -1.08 | 15   | 1.25   | 12  | 1.16  |   |
| 8561 | Zfp472         | -1.08 | 25   | 2.7    | 14  | 2.5   |   |
| 8562 | Gnb1l          | -1.08 | 66   | 1.73   | 73  | 1.6   |   |
| 8563 | Gstcd          | -1.08 | 80   | 2.9    | 46  | 2.68  |   |
| 8564 | LOC100909998   | -1.08 | 10   | 0.73   | 7   | 0.67  |   |
| 8565 | LOC100912024   | -1.08 | 0    | 6.01   | 0   | 5.56  |   |
| 8566 | Mapre3         | -1.08 | 57   | 6.07   | 37  | 5.61  |   |
| 8567 | Pltp           | -1.08 | 14   | 1.35   | 10  | 1.25  |   |
| 8568 | Rpl35a_3       | -1.08 | 0    | 8.31   | 0   | 7.68  |   |
| 8569 | Tas1r1         | -1.08 | 22   | 0.96   | 23  | 0.89  |   |
| 8570 | Top1mt         | -1.08 | 46   | 3.48   | 29  | 3.22  |   |
| 8571 | Trim59         | -1.08 | 38   | 2.97   | 25  | 2.74  |   |
| 8572 | Zfp579         | -1.08 | 47   | 3.84   | 33  | 3.55  |   |
| 8573 | Ap2m1          | -1.08 | 1000 | 136.17 | 639 | 125.9 |   |
| 8574 | Dpp8           | -1.08 | 577  | 32.9   | 377 | 30.42 |   |
| 8575 | Cacnb3         | -1.08 | 238  | 20.35  | 150 | 18.81 |   |
| 8576 | Fis1           | -1.08 | 263  | 37.06  | 169 | 34.25 |   |
| 8577 | Aifm1          | -1.08 | 194  | 16.78  | 138 | 15.5  |   |
| 8578 | Inpp5a         | -1.08 | 162  | 10.36  | 123 | 9.57  |   |
| 8579 | Irak1          | -1.08 | 399  | 28.22  | 247 | 26.06 |   |
| 8580 | Spopl          | -1.08 | 103  | 10.33  | 74  | 9.53  |   |
| 8581 | Kank2          | -1.08 | 1389 | 59.81  | 885 | 55.19 |   |

Supplemental Table 2  
Vehicle versus FSH, 24 hours

|      | A              | B     | C    | D      | E    | F      | G |
|------|----------------|-------|------|--------|------|--------|---|
| 8582 | Cwc27          | -1.08 | 136  | 6.8    | 92   | 6.27   |   |
| 8583 | Sat1           | -1.08 | 80   | 12.52  | 48   | 11.55  |   |
| 8584 | LOC680227      | -1.08 | 3771 | 15.82  | 3179 | 14.59  |   |
| 8585 | Alg12          | -1.08 | 91   | 6.35   | 59   | 5.86   |   |
| 8586 | Nsdhl          | -1.08 | 280  | 23.3   | 184  | 21.48  |   |
| 8587 | Phb            | -1.09 | 269  | 54.45  | 162  | 50.18  |   |
| 8588 | Ccne2          | -1.09 | 66   | 3.37   | 44   | 3.11   |   |
| 8589 | Gba2           | -1.09 | 216  | 10.14  | 104  | 9.35   |   |
| 8590 | Lbr            | -1.09 | 137  | 16.45  | 96   | 15.16  |   |
| 8591 | Mex3b          | -1.09 | 124  | 9.04   | 78   | 8.33   |   |
| 8592 | Mrps11         | -1.09 | 68   | 11.45  | 65   | 10.55  |   |
| 8593 | Ints8          | -1.09 | 290  | 17.36  | 208  | 15.99  |   |
| 8594 | Sec24b         | -1.09 | 615  | 26.95  | 413  | 24.83  |   |
| 8595 | Epc2           | -1.09 | 82   | 7.57   | 67   | 6.97   |   |
| 8596 | Atic           | -1.09 | 352  | 32.6   | 215  | 30.03  |   |
| 8597 | Rnf145         | -1.09 | 551  | 39.47  | 346  | 36.35  |   |
| 8598 | Ankrd40        | -1.09 | 332  | 22.32  | 204  | 20.56  |   |
| 8599 | Ywhaq          | -1.09 | 1040 | 119.54 | 654  | 110.05 |   |
| 8600 | Csf1           | -1.09 | 92   | 5.54   | 63   | 5.1    |   |
| 8601 | Fam8a1         | -1.09 | 62   | 6.47   | 33   | 5.96   |   |
| 8602 | Fnbp1l         | -1.09 | 228  | 11.06  | 142  | 10.18  |   |
| 8603 | Lrrc45         | -1.09 | 70   | 3.88   | 47   | 3.57   |   |
| 8604 | Pdcd2l         | -1.09 | 49   | 5.42   | 25   | 4.99   |   |
| 8605 | Yars2          | -1.09 | 45   | 4.78   | 27   | 4.4    |   |
| 8606 | Frs2           | -1.09 | 244  | 7.94   | 163  | 7.31   |   |
| 8607 | Kctd21         | -1.09 | 30   | 2.57   | 19   | 2.37   |   |
| 8608 | Pold4          | -1.09 | 35   | 8.91   | 20   | 8.2    |   |
| 8609 | Atf6           | -1.09 | 430  | 20.59  | 271  | 18.94  |   |
| 8610 | Ppp2r1a        | -1.09 | 1021 | 113.88 | 649  | 104.75 |   |
| 8611 | Phf23          | -1.09 | 217  | 27.8   | 138  | 25.57  |   |
| 8612 | Elp5           | -1.09 | 265  | 24.93  | 177  | 22.93  |   |
| 8613 | Trim11         | -1.09 | 121  | 8.47   | 80   | 7.79   |   |
| 8614 | Hipk1          | -1.09 | 1157 | 32.84  | 702  | 30.2   |   |
| 8615 | Ppp1r11        | -1.09 | 149  | 19.07  | 94   | 17.53  |   |
| 8616 | Tomm40l        | -1.09 | 50   | 9.71   | 32   | 8.92   |   |
| 8617 | AABR07067737.1 | -1.09 | 74   | 1.1    | 50   | 1.01   |   |
| 8618 | Ddrgk1         | -1.09 | 52   | 7.76   | 33   | 7.14   |   |
| 8619 | Kif15          | -1.09 | 65   | 2.55   | 42   | 2.35   |   |
| 8620 | Rab4a          | -1.09 | 56   | 8.66   | 37   | 7.96   |   |
| 8621 | Nudt3          | -1.09 | 377  | 31.99  | 254  | 29.41  |   |
| 8622 | LOC100911779   | -1.09 | 38   | 10.28  | 35   | 9.44   |   |
| 8623 | Mtap           | -1.09 | 269  | 5.58   | 122  | 5.13   |   |
| 8624 | Nr4a1          | -1.09 | 112  | 8.15   | 67   | 7.49   |   |
| 8625 | Phldb2         | -1.09 | 332  | 16.52  | 243  | 15.17  |   |
| 8626 | Agtr2          | -1.09 | 125  | 10.58  | 80   | 9.71   |   |
| 8627 | Pi4kb          | -1.09 | 587  | 28.66  | 372  | 26.31  |   |
| 8628 | Cptp           | -1.09 | 20   | 2.4    | 12   | 2.2    |   |
| 8629 | LOC691807      | -1.09 | 114  | 26.3   | 72   | 24.14  |   |
| 8630 | Mad2l1         | -1.09 | 45   | 6.65   | 29   | 6.1    |   |
| 8631 | Marcks1l       | -1.09 | 3    | 3.12   | 2    | 2.87   |   |
| 8632 | Mvb12a         | -1.09 | 172  | 35.26  | 108  | 32.36  |   |
| 8633 | RGD1309995     | -1.09 | 224  | 12.43  | 159  | 11.41  |   |
| 8634 | Stambp         | -1.09 | 75   | 7.35   | 51   | 6.75   |   |
| 8635 | Stx18          | -1.09 | 86   | 9.52   | 97   | 8.74   |   |



Supplemental Table 2  
Vehicle versus FSH, 24 hours

|      | A          | B     | C    | D      | E    | F      | G |
|------|------------|-------|------|--------|------|--------|---|
| 8636 | Tbc1d16    | -1.09 | 46   | 3.63   | 35   | 3.34   |   |
| 8637 | Tdrd3      | -1.09 | 95   | 4.99   | 73   | 4.58   |   |
| 8638 | Zfp1       | -1.09 | 19   | 3.92   | 14   | 3.59   |   |
| 8639 | Smek2      | -1.09 | 280  | 12.27  | 181  | 11.27  |   |
| 8640 | Sun1       | -1.09 | 633  | 33.75  | 404  | 30.97  |   |
| 8641 | Tuba1b     | -1.09 | 1296 | 969.39 | 881  | 889.41 |   |
| 8642 | Crebbp     | -1.09 | 657  | 14.38  | 432  | 13.19  |   |
| 8643 | Selt       | -1.09 | 156  | 35.92  | 97   | 32.95  |   |
| 8644 | Rprd1b     | -1.09 | 119  | 7.18   | 91   | 6.59   |   |
| 8645 | Casp3      | -1.09 | 87   | 8.51   | 65   | 7.8    |   |
| 8646 | Vps26a     | -1.09 | 103  | 15.01  | 78   | 13.77  |   |
| 8647 | Ei24       | -1.09 | 263  | 31.24  | 171  | 28.64  |   |
| 8648 | Desi1      | -1.09 | 94   | 11.44  | 63   | 10.48  |   |
| 8649 | Safb2      | -1.09 | 203  | 11.67  | 127  | 10.69  |   |
| 8650 | Mettl6     | -1.09 | 71   | 6.97   | 44   | 6.39   |   |
| 8651 | Snrpb      | -1.09 | 559  | 80.94  | 349  | 74.13  |   |
| 8652 | Gnl1       | -1.09 | 199  | 8.89   | 126  | 8.14   |   |
| 8653 | Gdi2       | -1.09 | 728  | 79.49  | 467  | 72.78  |   |
| 8654 | Arl5b      | -1.09 | 120  | 4.71   | 75   | 4.31   |   |
| 8655 | Dclk1      | -1.09 | 140  | 1.95   | 83   | 1.78   |   |
| 8656 | Usp22      | -1.09 | 517  | 51.88  | 308  | 47.5   |   |
| 8657 | Psmc7      | -1.09 | 244  | 35.62  | 164  | 32.6   |   |
| 8658 | Rps5       | -1.09 | 1183 | 381.08 | 734  | 348.82 |   |
| 8659 | Eogt       | -1.09 | 181  | 8.76   | 113  | 8.02   |   |
| 8660 | Dctn1      | -1.09 | 576  | 31.51  | 359  | 28.83  |   |
| 8661 | Arhgap11a  | -1.09 | 55   | 3.23   | 36   | 2.95   |   |
| 8662 | Eif4e3     | -1.09 | 43   | 2.65   | 20   | 2.42   |   |
| 8663 | Nedd4l     | -1.09 | 96   | 3.13   | 99   | 2.86   |   |
| 8664 | Pop5       | -1.09 | 30   | 4.68   | 18   | 4.28   |   |
| 8665 | Rab10      | -1.09 | 574  | 42.16  | 357  | 38.57  |   |
| 8666 | RGD1562114 | -1.09 | 32   | 9.91   | 19   | 9.07   |   |
| 8667 | Slc25a32   | -1.09 | 56   | 2.91   | 28   | 2.67   |   |
| 8668 | Ppp6r2     | -1.09 | 216  | 13.87  | 152  | 12.69  |   |
| 8669 | Hnrnpa2b1  | -1.09 | 650  | 186.23 | 429  | 170.33 |   |
| 8670 | Kras       | -1.09 | 93   | 10.92  | 61   | 9.98   |   |
| 8671 | Arfgef2    | -1.09 | 344  | 8.83   | 223  | 8.06   |   |
| 8672 | Gfpt1      | -1.09 | 601  | 21.09  | 359  | 19.26  |   |
| 8673 | Arpc1a     | -1.09 | 324  | 40.86  | 202  | 37.32  |   |
| 8674 | RGD1566265 | -1.09 | 37   | 7.11   | 24   | 6.49   |   |
| 8675 | Sccpdh     | -1.1  | 0    | 15.15  | 0    | 13.84  |   |
| 8676 | Ggnbp2     | -1.1  | 233  | 16.44  | 164  | 15.01  |   |
| 8677 | Zfp62      | -1.1  | 156  | 12.34  | 96   | 11.27  |   |
| 8678 | Cltc       | -1.1  | 278  | 51.49  | 176  | 47     |   |
| 8679 | Zc4h2      | -1.1  | 46   | 5      | 32   | 4.57   |   |
| 8680 | Zfp295     | -1.1  | 182  | 6.22   | 105  | 5.68   |   |
| 8681 | Ythdf2     | -1.1  | 228  | 23.39  | 163  | 21.33  |   |
| 8682 | Zcchc9     | -1.1  | 62   | 7.91   | 49   | 7.21   |   |
| 8683 | Rbm22      | -1.1  | 179  | 23.65  | 115  | 21.56  |   |
| 8684 | Mbnl2      | -1.1  | 1740 | 62.22  | 1117 | 56.72  |   |
| 8685 | Api5       | -1.1  | 564  | 35.66  | 337  | 32.5   |   |
| 8686 | RGD1304728 | -1.1  | 107  | 4.6    | 78   | 4.19   |   |
| 8687 | Ube2l3     | -1.1  | 629  | 62.22  | 396  | 56.7   |   |
| 8688 | RGD1307100 | -1.1  | 553  | 7.41   | 352  | 6.75   |   |
| 8689 | Coro1b     | -1.1  | 618  | 81.61  | 382  | 74.36  |   |

Supplemental Table 2  
Vehicle versus FSH, 24 hours

|      | A          | B    | C    | D      | E    | F      | G |
|------|------------|------|------|--------|------|--------|---|
| 8690 | Pkd2       | -1.1 | 500  | 20.24  | 303  | 18.44  |   |
| 8691 | Keap1      | -1.1 | 160  | 10.56  | 108  | 9.62   |   |
| 8692 | Zfp281     | -1.1 | 212  | 17.06  | 132  | 15.54  |   |
| 8693 | Phlpp1     | -1.1 | 226  | 5.81   | 159  | 5.29   |   |
| 8694 | Rpl27      | -1.1 | 474  | 380.03 | 388  | 346.1  |   |
| 8695 | Arid1a     | -1.1 | 1219 | 36.09  | 778  | 32.87  |   |
| 8696 | Rbm27      | -1.1 | 193  | 11.04  | 120  | 10.05  |   |
| 8697 | Abce1      | -1.1 | 451  | 30.55  | 281  | 27.81  |   |
| 8698 | Tbl2       | -1.1 | 102  | 5.31   | 72   | 4.84   |   |
| 8699 | Lman1      | -1.1 | 438  | 50.05  | 290  | 45.55  |   |
| 8700 | Cers4      | -1.1 | 118  | 7.37   | 74   | 6.7    |   |
| 8701 | Golgb1     | -1.1 | 700  | 14.33  | 444  | 13.04  |   |
| 8702 | Scyl1      | -1.1 | 356  | 31.12  | 219  | 28.32  |   |
| 8703 | Prim1      | -1.1 | 159  | 19.2   | 107  | 17.47  |   |
| 8704 | Eno1       | -1.1 | 476  | 303.32 | 330  | 275.91 |   |
| 8705 | Cpeb4      | -1.1 | 202  | 10.69  | 122  | 9.73   |   |
| 8706 | Srpr       | -1.1 | 605  | 60     | 395  | 54.56  |   |
| 8707 | Eef2       | -1.1 | 7049 | 600.83 | 4399 | 546.39 |   |
| 8708 | Phrf1      | -1.1 | 442  | 18.69  | 298  | 16.98  |   |
| 8709 | AC110387.1 | -1.1 | 2    | 5.19   | 2    | 4.71   |   |
| 8710 | Alg6       | -1.1 | 30   | 2.62   | 31   | 2.38   |   |
| 8711 | Cpeb3      | -1.1 | 57   | 0.75   | 51   | 0.68   |   |
| 8712 | Crocc      | -1.1 | 40   | 0.83   | 33   | 0.76   |   |
| 8713 | Erich1     | -1.1 | 46   | 5.66   | 30   | 5.14   |   |
| 8714 | Ryr3       | -1.1 | 18   | 0.14   | 16   | 0.12   |   |
| 8715 | Agbl3      | -1.1 | 35   | 0.42   | 22   | 0.38   |   |
| 8716 | Ap3m2      | -1.1 | 19   | 1.59   | 9    | 1.45   |   |
| 8717 | Armcx6     | -1.1 | 49   | 6.2    | 30   | 5.63   |   |
| 8718 | Car13      | -1.1 | 12   | 1.01   | 6    | 0.91   |   |
| 8719 | Cd80       | -1.1 | 9    | 0.45   | 5    | 0.41   |   |
| 8720 | Cuedc1     | -1.1 | 63   | 5.59   | 41   | 5.07   |   |
| 8721 | Exnef      | -1.1 | 35   | 0.64   | 27   | 0.58   |   |
| 8722 | Kif5a      | -1.1 | 11   | 0.32   | 13   | 0.29   |   |
| 8723 | LOC684270  | -1.1 | 22   | 2.16   | 22   | 1.96   |   |
| 8724 | Nfxl1      | -1.1 | 101  | 4.2    | 58   | 3.81   |   |
| 8725 | Rad51ap1   | -1.1 | 22   | 2.01   | 19   | 1.83   |   |
| 8726 | Rad9a      | -1.1 | 57   | 8.45   | 33   | 7.68   |   |
| 8727 | Rasl10b    | -1.1 | 10   | 1.42   | 6    | 1.29   |   |
| 8728 | RGD1563091 | -1.1 | 48   | 2.31   | 30   | 2.1    |   |
| 8729 | Surf2      | -1.1 | 0    | 1.72   | 0    | 1.56   |   |
| 8730 | Syt5       | -1.1 | 10   | 1.1    | 7    | 0.99   |   |
| 8731 | Tmem5      | -1.1 | 58   | 3.11   | 41   | 2.82   |   |
| 8732 | Zbtb49     | -1.1 | 60   | 2.86   | 45   | 2.6    |   |
| 8733 | Hnrnpab_2  | -1.1 | 0    | 47.73  | 0    | 43.32  |   |
| 8734 | Adrbk1     | -1.1 | 255  | 26.01  | 160  | 23.6   |   |
| 8735 | Zfp592     | -1.1 | 270  | 8.47   | 171  | 7.68   |   |
| 8736 | Ndufs4     | -1.1 | 339  | 39.42  | 235  | 35.77  |   |
| 8737 | Prpf38b    | -1.1 | 201  | 13.48  | 133  | 12.22  |   |
| 8738 | Thada      | -1.1 | 237  | 4.71   | 154  | 4.27   |   |
| 8739 | Prdx3      | -1.1 | 277  | 44.72  | 178  | 40.56  |   |
| 8740 | Slc25a5    | -1.1 | 454  | 110.46 | 277  | 100.17 |   |
| 8741 | Zfp777     | -1.1 | 152  | 11.16  | 97   | 10.12  |   |
| 8742 | Btg1       | -1.1 | 333  | 57.09  | 210  | 51.76  |   |
| 8743 | Homer3     | -1.1 | 145  | 7.94   | 80   | 7.2    |   |

Supplemental Table 2  
Vehicle versus FSH, 24 hours

|      | A              | B     | C   | D      | E   | F      | G |
|------|----------------|-------|-----|--------|-----|--------|---|
| 8744 | LOC688906      | -1.1  | 454 | 14.27  | 295 | 12.93  |   |
| 8745 | Atxn1          | -1.1  | 239 | 5.84   | 165 | 5.3    |   |
| 8746 | Eny2           | -1.1  | 107 | 10.34  | 68  | 9.37   |   |
| 8747 | Sh3gl1         | -1.1  | 402 | 41.34  | 249 | 37.46  |   |
| 8748 | Srsf4          | -1.1  | 340 | 16.5   | 183 | 14.94  |   |
| 8749 | Tada2a         | -1.1  | 117 | 8.18   | 92  | 7.41   |   |
| 8750 | Ppp1cb         | -1.1  | 551 | 43.58  | 347 | 39.46  |   |
| 8751 | Acap3          | -1.1  | 67  | 3.41   | 43  | 3.09   |   |
| 8752 | Ighmbp2        | -1.1  | 72  | 4.1    | 46  | 3.71   |   |
| 8753 | Trappc6b       | -1.1  | 87  | 12.84  | 50  | 11.62  |   |
| 8754 | Zgpat          | -1.1  | 64  | 7.7    | 41  | 6.97   |   |
| 8755 | Casp7          | -1.1  | 72  | 6.25   | 47  | 5.66   |   |
| 8756 | Hdgfrp3        | -1.1  | 151 | 7.31   | 87  | 6.62   |   |
| 8757 | Smg7           | -1.1  | 371 | 14.9   | 234 | 13.48  |   |
| 8758 | Stx12          | -1.11 | 250 | 21.02  | 169 | 19.02  |   |
| 8759 | Pak2_1         | -1.11 | 357 | 28.87  | 205 | 26.12  |   |
| 8760 | Ebna1bp2       | -1.11 | 1   | 30.52  | 1   | 27.62  |   |
| 8761 | Rbbp5          | -1.11 | 126 | 6.86   | 83  | 6.2    |   |
| 8762 | Rn60_17_0530.1 | -1.11 | 52  | 17.73  | 28  | 16.04  |   |
| 8763 | Pdxdc1         | -1.11 | 236 | 8.23   | 204 | 7.45   |   |
| 8764 | Pmpca          | -1.11 | 196 | 22.85  | 135 | 20.66  |   |
| 8765 | Vps9d1         | -1.11 | 132 | 8.3    | 109 | 7.51   |   |
| 8766 | Hexim1         | -1.11 | 180 | 21.25  | 112 | 19.21  |   |
| 8767 | Mt-nd4l        | -1.11 | 458 | 790.28 | 243 | 714.38 |   |
| 8768 | Leprot         | -1.11 | 31  | 16.28  | 24  | 14.71  |   |
| 8769 | Ndufv2         | -1.11 | 147 | 35.6   | 102 | 32.17  |   |
| 8770 | Pitpnb         | -1.11 | 315 | 30.31  | 190 | 27.4   |   |
| 8771 | Trappc2l       | -1.11 | 59  | 34.34  | 40  | 31.03  |   |
| 8772 | Pebp1          | -1.11 | 667 | 152.09 | 418 | 137.43 |   |
| 8773 | Adam23         | -1.11 | 59  | 3.21   | 37  | 2.9    |   |
| 8774 | Gpt2           | -1.11 | 78  | 2.77   | 44  | 2.5    |   |
| 8775 | Acadl          | -1.11 | 234 | 30.15  | 142 | 27.22  |   |
| 8776 | Lig1           | -1.11 | 44  | 19.83  | 15  | 17.91  |   |
| 8777 | Epb4.1         | -1.11 | 228 | 9.64   | 149 | 8.71   |   |
| 8778 | Ash1l          | -1.11 | 885 | 15.05  | 583 | 13.59  |   |
| 8779 | Mapkapk5       | -1.11 | 183 | 18.65  | 109 | 16.83  |   |
| 8780 | Sel1l          | -1.11 | 757 | 27.94  | 466 | 25.22  |   |
| 8781 | Scaf8          | -1.11 | 420 | 19.98  | 266 | 18.03  |   |
| 8782 | Kntc1          | -1.11 | 140 | 4.77   | 90  | 4.3    |   |
| 8783 | Nat10          | -1.11 | 130 | 7.68   | 84  | 6.93   |   |
| 8784 | Smad7          | -1.11 | 215 | 8.88   | 113 | 8.01   |   |
| 8785 | Ufd1l          | -1.11 | 222 | 24.74  | 164 | 22.32  |   |
| 8786 | Ep400          | -1.11 | 880 | 18.64  | 555 | 16.81  |   |
| 8787 | Aaas           | -1.11 | 117 | 11.34  | 80  | 10.23  |   |
| 8788 | Gcfc2          | -1.11 | 52  | 2.8    | 36  | 2.52   |   |
| 8789 | Gmnn           | -1.11 | 32  | 6.13   | 20  | 5.53   |   |
| 8790 | Gpsm2          | -1.11 | 37  | 2.79   | 24  | 2.52   |   |
| 8791 | Ibtk           | -1.11 | 255 | 12.48  | 163 | 11.26  |   |
| 8792 | Znrf1          | -1.11 | 74  | 8.34   | 53  | 7.53   |   |
| 8793 | Dock7          | -1.11 | 676 | 20.58  | 443 | 18.55  |   |
| 8794 | Chfr           | -1.11 | 173 | 10.83  | 129 | 9.76   |   |
| 8795 | Smurf2         | -1.11 | 295 | 13.48  | 173 | 12.16  |   |
| 8796 | Txnrd1         | -1.11 | 448 | 25.64  | 258 | 23.12  |   |
| 8797 | Pparg          | -1.11 | 384 | 23.46  | 244 | 21.15  |   |

Supplemental Table 2  
Vehicle versus FSH, 24 hours

|      | A              | B     | C    | D      | E   | F      | G |
|------|----------------|-------|------|--------|-----|--------|---|
| 8798 | Rexo4          | -1.11 | 138  | 11.46  | 86  | 10.33  |   |
| 8799 | Rbm15b         | -1.11 | 179  | 16.74  | 110 | 15.09  |   |
| 8800 | Bak1           | -1.11 | 236  | 30.22  | 156 | 27.23  |   |
| 8801 | Simc1          | -1.11 | 140  | 6.53   | 98  | 5.88   |   |
| 8802 | Myo18a         | -1.11 | 325  | 9.48   | 200 | 8.54   |   |
| 8803 | Rbbp8          | -1.11 | 214  | 12.07  | 146 | 10.87  |   |
| 8804 | LOC100911372   | -1.11 | 27   | 334.46 | 31  | 301.26 |   |
| 8805 | Slc30a4        | -1.11 | 210  | 9.45   | 133 | 8.5    |   |
| 8806 | Hnrnpm         | -1.11 | 611  | 52.91  | 433 | 47.61  |   |
| 8807 | AC120727.1     | -1.11 | 29   | 8.27   | 18  | 7.44   |   |
| 8808 | Dusp11_2       | -1.11 | 0    | 4.63   | 0   | 4.17   |   |
| 8809 | Sntb2          | -1.11 | 99   | 6.16   | 74  | 5.54   |   |
| 8810 | Specc1l        | -1.11 | 482  | 15.88  | 323 | 14.28  |   |
| 8811 | Twistnb        | -1.11 | 66   | 4.41   | 40  | 3.97   |   |
| 8812 | Dusp12         | -1.11 | 34   | 4.09   | 20  | 3.68   |   |
| 8813 | Paqr3          | -1.11 | 36   | 2.82   | 24  | 2.53   |   |
| 8814 | Snx16          | -1.11 | 39   | 2.26   | 25  | 2.03   |   |
| 8815 | Oaz1           | -1.11 | 1550 | 541.51 | 962 | 487.01 |   |
| 8816 | Mgrn1          | -1.11 | 552  | 46.9   | 337 | 42.17  |   |
| 8817 | Ptprn          | -1.11 | 149  | 9.58   | 91  | 8.62   |   |
| 8818 | Lpcat1         | -1.11 | 123  | 6.7    | 73  | 6.02   |   |
| 8819 | Itfg2          | -1.11 | 72   | 6.13   | 47  | 5.51   |   |
| 8820 | Terf2          | -1.11 | 110  | 6.91   | 67  | 6.21   |   |
| 8821 | Vapb           | -1.11 | 151  | 27.74  | 93  | 24.92  |   |
| 8822 | Whsc1l1        | -1.11 | 391  | 10.79  | 259 | 9.69   |   |
| 8823 | Hn1            | -1.11 | 483  | 65.53  | 301 | 58.86  |   |
| 8824 | Ankrd11        | -1.11 | 1563 | 38.55  | 979 | 34.62  |   |
| 8825 | Wdr45b         | -1.11 | 286  | 17.37  | 191 | 15.59  |   |
| 8826 | Farsb          | -1.11 | 221  | 21.4   | 128 | 19.21  |   |
| 8827 | Gpatch8        | -1.11 | 646  | 16.86  | 423 | 15.13  |   |
| 8828 | Ccdc82         | -1.11 | 47   | 2.32   | 36  | 2.08   |   |
| 8829 | Cep83          | -1.11 | 40   | 3.15   | 34  | 2.83   |   |
| 8830 | Znhit6         | -1.11 | 62   | 5.43   | 31  | 4.87   |   |
| 8831 | G2e3           | -1.11 | 102  | 3.42   | 57  | 3.07   |   |
| 8832 | Ruvbl2         | -1.11 | 161  | 21.71  | 109 | 19.48  |   |
| 8833 | Rnf5           | -1.11 | 14   | 23.96  | 17  | 21.49  |   |
| 8834 | Psma4          | -1.11 | 251  | 50.36  | 153 | 45.18  |   |
| 8835 | Bcl2l13        | -1.12 | 157  | 18.87  | 113 | 16.93  |   |
| 8836 | Brd2           | -1.12 | 44   | 45.04  | 35  | 40.39  |   |
| 8837 | AABR07047262.1 | -1.12 | 13   | 4.45   | 5   | 3.99   |   |
| 8838 | Cep76          | -1.12 | 82   | 3.48   | 59  | 3.12   |   |
| 8839 | Stk39          | -1.12 | 185  | 6.12   | 110 | 5.49   |   |
| 8840 | Ublcp1         | -1.12 | 194  | 16.91  | 134 | 15.16  |   |
| 8841 | Rab11a         | -1.12 | 203  | 22.14  | 134 | 19.85  |   |
| 8842 | Akr1a1         | -1.12 | 1321 | 253.74 | 811 | 227.41 |   |
| 8843 | Lrrc2          | -1.12 | 95   | 5.41   | 61  | 4.85   |   |
| 8844 | Casc3          | -1.12 | 366  | 20.64  | 231 | 18.49  |   |
| 8845 | LOC502894      | -1.12 | 73   | 5.52   | 37  | 4.94   |   |
| 8846 | Plk4           | -1.12 | 68   | 4.32   | 41  | 3.87   |   |
| 8847 | Spred2         | -1.12 | 107  | 8.82   | 71  | 7.9    |   |
| 8848 | Tbc1d19        | -1.12 | 124  | 7.84   | 68  | 7.02   |   |
| 8849 | Ak2            | -1.12 | 224  | 28.54  | 190 | 25.57  |   |
| 8850 | Prrg1          | -1.12 | 191  | 9.98   | 127 | 8.94   |   |
| 8851 | Itpril2        | -1.12 | 86   | 11.3   | 53  | 10.12  |   |

Supplemental Table 2  
Vehicle versus FSH, 24 hours

|      | A            | B     | C    | D      | E   | F      | G |
|------|--------------|-------|------|--------|-----|--------|---|
| 8852 | Dsg2         | -1.12 | 424  | 12.57  | 277 | 11.25  |   |
| 8853 | Hectd1       | -1.12 | 929  | 25.98  | 594 | 23.26  |   |
| 8854 | Tsr2         | -1.12 | 89   | 6.44   | 51  | 5.76   |   |
| 8855 | Sdccag3      | -1.12 | 323  | 25.58  | 205 | 22.89  |   |
| 8856 | Tial1        | -1.12 | 178  | 20.78  | 120 | 18.6   |   |
| 8857 | Sumf1        | -1.12 | 168  | 15.07  | 107 | 13.49  |   |
| 8858 | Calm3        | -1.12 | 387  | 54.22  | 263 | 48.51  |   |
| 8859 | Ptprk        | -1.12 | 1064 | 41.81  | 775 | 37.39  |   |
| 8860 | Pa2g4        | -1.12 | 351  | 55.53  | 220 | 49.66  |   |
| 8861 | Adamts3      | -1.12 | 18   | 0.77   | 13  | 0.69   |   |
| 8862 | Adcy3        | -1.12 | 29   | 0.57   | 17  | 0.51   |   |
| 8863 | Commd3       | -1.12 | 112  | 28.2   | 68  | 25.21  |   |
| 8864 | Cox14        | -1.12 | 26   | 37.23  | 16  | 33.29  |   |
| 8865 | Crcp         | -1.12 | 45   | 4.19   | 48  | 3.75   |   |
| 8866 | Enpp1        | -1.12 | 99   | 5.53   | 59  | 4.95   |   |
| 8867 | LOC100360791 | -1.12 | 6    | 6.24   | 6   | 5.58   |   |
| 8868 | Mospd3       | -1.12 | 251  | 61.36  | 157 | 54.87  |   |
| 8869 | Nr2c2ap      | -1.12 | 63   | 10.64  | 38  | 9.52   |   |
| 8870 | Peli2        | -1.12 | 62   | 2.99   | 57  | 2.67   |   |
| 8871 | Prmt6        | -1.12 | 41   | 3.91   | 32  | 3.5    |   |
| 8872 | Tmem87b      | -1.12 | 249  | 10.52  | 151 | 9.41   |   |
| 8873 | Whsc1        | -1.12 | 476  | 15.92  | 292 | 14.23  |   |
| 8874 | Zranb1       | -1.12 | 169  | 12.82  | 105 | 11.47  |   |
| 8875 | Asah2        | -1.12 | 31   | 1.29   | 19  | 1.15   |   |
| 8876 | LOC100911881 | -1.12 | 0    | 4.84   | 0   | 4.33   |   |
| 8877 | Rpp30        | -1.12 | 133  | 6.76   | 70  | 6.04   |   |
| 8878 | Rps14        | -1.12 | 25   | 130.59 | 17  | 116.72 |   |
| 8879 | Sos2         | -1.12 | 372  | 10.63  | 284 | 9.5    |   |
| 8880 | Camsap2      | -1.12 | 445  | 11.58  | 258 | 10.35  |   |
| 8881 | Sugt1        | -1.12 | 176  | 21.12  | 118 | 18.87  |   |
| 8882 | Bop1         | -1.12 | 156  | 14.88  | 96  | 13.29  |   |
| 8883 | Exosc10      | -1.12 | 332  | 20.37  | 200 | 18.2   |   |
| 8884 | RGD1309748   | -1.12 | 517  | 13.3   | 323 | 11.88  |   |
| 8885 | Dcaf12       | -1.12 | 120  | 15.29  | 73  | 13.65  |   |
| 8886 | Sf3a2        | -1.12 | 167  | 23.72  | 112 | 21.18  |   |
| 8887 | Cox6a1       | -1.12 | 113  | 265.96 | 167 | 237.42 |   |
| 8888 | Cacybp       | -1.12 | 149  | 15.77  | 90  | 14.08  |   |
| 8889 | Clns1a       | -1.12 | 167  | 24.14  | 98  | 21.55  |   |
| 8890 | RGD1562310   | -1.12 | 130  | 6.85   | 72  | 6.12   |   |
| 8891 | Vps4b        | -1.12 | 217  | 17.39  | 129 | 15.52  |   |
| 8892 | Ddx49        | -1.12 | 216  | 27.18  | 132 | 24.25  |   |
| 8893 | Mtmr6        | -1.12 | 258  | 15.3   | 162 | 13.66  |   |
| 8894 | Zfp189       | -1.12 | 60   | 4.79   | 36  | 4.27   |   |
| 8895 | Aen          | -1.12 | 125  | 11.97  | 74  | 10.68  |   |
| 8896 | LOC501282    | -1.12 | 134  | 57.04  | 86  | 50.89  |   |
| 8897 | Usp1         | -1.12 | 128  | 8.03   | 77  | 7.16   |   |
| 8898 | Stx6         | -1.12 | 238  | 21.74  | 158 | 19.4   |   |
| 8899 | Ube3c        | -1.12 | 423  | 19.99  | 275 | 17.83  |   |
| 8900 | Cds2         | -1.12 | 153  | 16.13  | 97  | 14.39  |   |
| 8901 | AC106292.2   | -1.12 | 130  | 28.67  | 81  | 25.57  |   |
| 8902 | Knop1_2      | -1.12 | 54   | 11.34  | 31  | 10.11  |   |
| 8903 | Rbms3        | -1.12 | 706  | 14.71  | 421 | 13.11  |   |
| 8904 | Polr1a       | -1.12 | 275  | 10.4   | 172 | 9.27   |   |
| 8905 | Cspp1        | -1.12 | 216  | 7.01   | 158 | 6.25   |   |

Supplemental Table 2  
Vehicle versus FSH, 24 hours

|      | A            | B     | C    | D      | E    | F      | G |
|------|--------------|-------|------|--------|------|--------|---|
| 8906 | Pik3cb       | -1.12 | 92   | 3.87   | 56   | 3.45   |   |
| 8907 | Bms1         | -1.12 | 246  | 12.52  | 144  | 11.15  |   |
| 8908 | Vsig10       | -1.12 | 733  | 44.27  | 385  | 39.43  |   |
| 8909 | Arhgap33     | -1.12 | 35   | 1.84   | 19   | 1.64   |   |
| 8910 | E2f5         | -1.12 | 56   | 7.62   | 38   | 6.78   |   |
| 8911 | Mcat         | -1.12 | 42   | 4.07   | 32   | 3.62   |   |
| 8912 | Snrpc        | -1.12 | 52   | 21.62  | 29   | 19.25  |   |
| 8913 | Zbtb4        | -1.12 | 127  | 9.57   | 76   | 8.52   |   |
| 8914 | Arl1         | -1.12 | 164  | 37.52  | 95   | 33.4   |   |
| 8915 | Bahd1        | -1.12 | 153  | 8.16   | 92   | 7.27   |   |
| 8916 | Lypla2       | -1.12 | 147  | 23.02  | 92   | 20.49  |   |
| 8917 | Trip4        | -1.12 | 200  | 7.52   | 138  | 6.7    |   |
| 8918 | Eif2ak2      | -1.12 | 101  | 5.06   | 72   | 4.5    |   |
| 8919 | LOC103689992 | -1.12 | 309  | 76.34  | 197  | 67.95  |   |
| 8920 | Mam1         | -1.12 | 300  | 12.56  | 185  | 11.18  |   |
| 8921 | Herc2        | -1.12 | 735  | 10.78  | 465  | 9.6    |   |
| 8922 | Hsf1         | -1.12 | 160  | 10.11  | 84   | 9      |   |
| 8923 | Zwilch       | -1.12 | 70   | 6.82   | 46   | 6.06   |   |
| 8924 | Zc3h13       | -1.12 | 364  | 13.26  | 231  | 11.8   |   |
| 8925 | Zfp800       | -1.12 | 137  | 6.63   | 75   | 5.89   |   |
| 8926 | Hdac6_1      | -1.12 | 13   | 18.63  | 13   | 16.56  |   |
| 8927 | Ubr3         | -1.12 | 333  | 10.99  | 211  | 9.77   |   |
| 8928 | Ttf1         | -1.12 | 112  | 3.47   | 79   | 3.09   |   |
| 8929 | Urgcp        | -1.12 | 173  | 7.89   | 111  | 7.01   |   |
| 8930 | Zfand5       | -1.12 | 316  | 33.19  | 184  | 29.51  |   |
| 8931 | Tfdp1        | -1.12 | 291  | 22.25  | 173  | 19.78  |   |
| 8932 | Manf         | -1.12 | 448  | 129.31 | 273  | 114.97 |   |
| 8933 | RGD1562161   | -1.12 | 167  | 7.89   | 104  | 7.01   |   |
| 8934 | Atp5b        | -1.13 | 3743 | 519.41 | 2288 | 461.52 |   |
| 8935 | Sbno1        | -1.13 | 368  | 15.26  | 243  | 13.56  |   |
| 8936 | Synrg        | -1.13 | 268  | 15.49  | 159  | 13.76  |   |
| 8937 | Ccnl2        | -1.13 | 590  | 28.41  | 383  | 25.23  |   |
| 8938 | Ddx56        | -1.13 | 70   | 13.66  | 53   | 12.13  |   |
| 8939 | Hypk         | -1.13 | 28   | 23     | 18   | 20.42  |   |
| 8940 | N6amt2       | -1.13 | 36   | 2.14   | 27   | 1.9    |   |
| 8941 | Plin2        | -1.13 | 219  | 19.29  | 138  | 17.13  |   |
| 8942 | Rgag4        | -1.13 | 36   | 4.98   | 22   | 4.42   |   |
| 8943 | Rpl35a_5     | -1.13 | 0    | 13.47  | 0    | 11.96  |   |
| 8944 | Mrps25       | -1.13 | 53   | 12.17  | 37   | 10.81  |   |
| 8945 | Sde2         | -1.13 | 165  | 11.13  | 99   | 9.89   |   |
| 8946 | Trib2        | -1.13 | 1606 | 120.58 | 914  | 107.08 |   |
| 8947 | Zcchc7       | -1.13 | 316  | 8.99   | 230  | 7.99   |   |
| 8948 | Kcmf1        | -1.13 | 274  | 36.73  | 175  | 32.61  |   |
| 8949 | Bcl9l        | -1.13 | 420  | 16.14  | 270  | 14.33  |   |
| 8950 | Ap1b1        | -1.13 | 305  | 17.63  | 180  | 15.64  |   |
| 8951 | Psmb7        | -1.13 | 426  | 57.74  | 266  | 51.24  |   |
| 8952 | Csnk1e       | -1.13 | 320  | 22.62  | 204  | 20.06  |   |
| 8953 | Srsf11       | -1.13 | 634  | 38.65  | 355  | 34.28  |   |
| 8954 | Hus1         | -1.13 | 89   | 3.17   | 59   | 2.81   |   |
| 8955 | Med19        | -1.13 | 119  | 11.34  | 74   | 10.06  |   |
| 8956 | Rufy1        | -1.13 | 181  | 9.35   | 91   | 8.28   |   |
| 8957 | Tmem135      | -1.13 | 281  | 14.37  | 186  | 12.74  |   |
| 8958 | Ercc6l2      | -1.13 | 234  | 6.31   | 178  | 5.59   |   |
| 8959 | Nrf1         | -1.13 | 219  | 8.72   | 124  | 7.73   |   |

Supplemental Table 2  
Vehicle versus FSH, 24 hours

|      | A          | B     | C    | D      | E    | F      | G |
|------|------------|-------|------|--------|------|--------|---|
| 8960 | Ppm1k      | -1.13 | 205  | 15.06  | 120  | 13.34  |   |
| 8961 | Tom20      | -1.13 | 290  | 63.82  | 170  | 56.53  |   |
| 8962 | Kpna6      | -1.13 | 400  | 20.2   | 251  | 17.89  |   |
| 8963 | Fam193a    | -1.13 | 404  | 18.85  | 288  | 16.69  |   |
| 8964 | Azi2       | -1.13 | 191  | 15.33  | 130  | 13.57  |   |
| 8965 | Man1b1     | -1.13 | 696  | 42.15  | 408  | 37.32  |   |
| 8966 | Hspa13     | -1.13 | 311  | 18.25  | 190  | 16.16  |   |
| 8967 | Map2       | -1.13 | 156  | 4.51   | 94   | 4      |   |
| 8968 | Rps3       | -1.13 | 993  | 333.25 | 622  | 294.94 |   |
| 8969 | Ehd1       | -1.13 | 301  | 22.28  | 177  | 19.72  |   |
| 8970 | Cpne3      | -1.13 | 208  | 16.21  | 128  | 14.34  |   |
| 8971 | Lztr1      | -1.13 | 261  | 20.43  | 165  | 18.07  |   |
| 8972 | Magohb     | -1.13 | 24   | 7.2    | 20   | 6.37   |   |
| 8973 | Ppp2r2d    | -1.13 | 170  | 13.41  | 99   | 11.86  |   |
| 8974 | Pqlc2      | -1.13 | 57   | 2.12   | 37   | 1.87   |   |
| 8975 | Spata7     | -1.13 | 74   | 2.86   | 56   | 2.53   |   |
| 8976 | Tyw5       | -1.13 | 39   | 3.89   | 28   | 3.44   |   |
| 8977 | Hnrpd      | -1.13 | 374  | 48.66  | 231  | 43.02  |   |
| 8978 | Usp42      | -1.13 | 178  | 7.19   | 100  | 6.36   |   |
| 8979 | Lyst       | -1.13 | 195  | 3.91   | 113  | 3.46   |   |
| 8980 | Cttn_1     | -1.13 | 0    | 21.55  | 0    | 19.05  |   |
| 8981 | Snx3       | -1.13 | 353  | 66.47  | 209  | 58.76  |   |
| 8982 | Arrdc1     | -1.13 | 130  | 15.32  | 74   | 13.54  |   |
| 8983 | Ndufb2     | -1.13 | 106  | 53     | 67   | 46.85  |   |
| 8984 | Lrrc47     | -1.13 | 301  | 23.08  | 190  | 20.4   |   |
| 8985 | Spen       | -1.13 | 557  | 10.63  | 331  | 9.4    |   |
| 8986 | Ccdc94_1   | -1.13 | 61   | 8.92   | 38   | 7.88   |   |
| 8987 | Mafg       | -1.13 | 212  | 19.48  | 148  | 17.21  |   |
| 8988 | Atp5c1     | -1.13 | 666  | 18.66  | 431  | 16.48  |   |
| 8989 | Wdr70      | -1.13 | 110  | 5.95   | 90   | 5.26   |   |
| 8990 | Slit2      | -1.13 | 160  | 4.23   | 102  | 3.73   |   |
| 8991 | Arse       | -1.13 | 87   | 10.72  | 65   | 9.47   |   |
| 8992 | Brf2       | -1.13 | 102  | 10.68  | 58   | 9.43   |   |
| 8993 | Kdm7a      | -1.13 | 89   | 7.56   | 65   | 6.67   |   |
| 8994 | Bcl2l2     | -1.13 | 197  | 13.17  | 120  | 11.62  |   |
| 8995 | Tex15      | -1.13 | 496  | 12.32  | 326  | 10.88  |   |
| 8996 | Actr1a     | -1.13 | 731  | 59.61  | 436  | 52.6   |   |
| 8997 | Mttr3      | -1.13 | 690  | 22.14  | 428  | 19.53  |   |
| 8998 | Inpp1      | -1.13 | 52   | 3.3    | 43   | 2.91   |   |
| 8999 | Nck1       | -1.13 | 94   | 8      | 58   | 7.06   |   |
| 9000 | Rps25      | -1.13 | 141  | 375.41 | 152  | 331.17 |   |
| 9001 | Fyttd1     | -1.13 | 187  | 28.81  | 109  | 25.4   |   |
| 9002 | Erc1       | -1.13 | 446  | 10.32  | 289  | 9.09   |   |
| 9003 | Tmed7      | -1.13 | 555  | 38.73  | 326  | 34.15  |   |
| 9004 | RGD1311595 | -1.13 | 197  | 5.17   | 124  | 4.56   |   |
| 9005 | Mvd        | -1.13 | 165  | 22.76  | 99   | 20.06  |   |
| 9006 | Isca2      | -1.13 | 60   | 29.24  | 42   | 25.77  |   |
| 9007 | Plod2      | -1.14 | 6880 | 445.88 | 4175 | 392.73 |   |
| 9008 | Atg16l2    | -1.14 | 44   | 3.92   | 35   | 3.45   |   |
| 9009 | Ireb2      | -1.14 | 288  | 17.02  | 182  | 14.99  |   |
| 9010 | Mad2l1bp   | -1.14 | 37   | 4.44   | 20   | 3.91   |   |
| 9011 | Tmem168    | -1.14 | 144  | 15.71  | 88   | 13.83  |   |
| 9012 | Nek9       | -1.14 | 488  | 38.49  | 298  | 33.89  |   |
| 9013 | Chm        | -1.14 | 85   | 5.06   | 55   | 4.45   |   |

Supplemental Table 2  
Vehicle versus FSH, 24 hours

|      | A              | B     | C    | D      | E   | F      | G |
|------|----------------|-------|------|--------|-----|--------|---|
| 9014 | Mrps14         | -1.14 | 86   | 10.3   | 47  | 9.07   |   |
| 9015 | Ckap4          | -1.14 | 1032 | 99.84  | 617 | 87.82  |   |
| 9016 | AABR07063855.1 | -1.14 | 22   | 5.19   | 10  | 4.57   |   |
| 9017 | Tmem41b        | -1.14 | 95   | 8.03   | 67  | 7.07   |   |
| 9018 | Nae1           | -1.14 | 112  | 11.34  | 73  | 9.97   |   |
| 9019 | Stau2          | -1.14 | 114  | 6.98   | 80  | 6.13   |   |
| 9020 | Lypla1         | -1.14 | 275  | 21.69  | 158 | 19.06  |   |
| 9021 | Rad18          | -1.14 | 66   | 4.34   | 34  | 3.82   |   |
| 9022 | Nme6           | -1.14 | 51   | 6.57   | 35  | 5.78   |   |
| 9023 | Rnaseh2b       | -1.14 | 53   | 7.55   | 45  | 6.63   |   |
| 9024 | Zfp449         | -1.14 | 47   | 2.74   | 30  | 2.41   |   |
| 9025 | Iqsec2         | -1.14 | 167  | 5.12   | 100 | 4.49   |   |
| 9026 | Mrpl20         | -1.14 | 106  | 31.52  | 70  | 27.67  |   |
| 9027 | Thap7          | -1.14 | 65   | 6      | 38  | 5.27   |   |
| 9028 | Dmxl1          | -1.14 | 299  | 6.74   | 198 | 5.92   |   |
| 9029 | Paics          | -1.14 | 142  | 31.08  | 78  | 27.28  |   |
| 9030 | Eif3e          | -1.14 | 135  | 48.42  | 111 | 42.48  |   |
| 9031 | Aup1           | -1.14 | 232  | 37.12  | 148 | 32.57  |   |
| 9032 | Hnrnp2         | -1.14 | 221  | 33.54  | 135 | 29.43  |   |
| 9033 | RGD1310081     | -1.14 | 145  | 3.35   | 81  | 2.94   |   |
| 9034 | Leng8          | -1.14 | 630  | 27.63  | 386 | 24.23  |   |
| 9035 | Ints12         | -1.14 | 59   | 8.05   | 35  | 7.06   |   |
| 9036 | Kdm1b          | -1.14 | 70   | 3.44   | 53  | 3.02   |   |
| 9037 | LOC100360647   | -1.14 | 98   | 208.65 | 70  | 182.93 |   |
| 9038 | Bptf           | -1.14 | 673  | 15.09  | 438 | 13.23  |   |
| 9039 | Thumpd1        | -1.14 | 133  | 14.4   | 80  | 12.62  |   |
| 9040 | 0610010F05Rik  | -1.14 | 194  | 6.66   | 93  | 5.84   |   |
| 9041 | LOC100362142   | -1.14 | 385  | 68.48  | 239 | 60     |   |
| 9042 | Psm5           | -1.14 | 239  | 51.61  | 145 | 45.21  |   |
| 9043 | LOC100363012   | -1.14 | 82   | 102.43 | 53  | 89.73  |   |
| 9044 | Atp5f1_1       | -1.14 | 0    | 17.63  | 0   | 15.44  |   |
| 9045 | Zbtb34         | -1.14 | 167  | 5.97   | 101 | 5.23   |   |
| 9046 | Naa20          | -1.14 | 133  | 14.88  | 103 | 13.03  |   |
| 9047 | Rufy3          | -1.14 | 121  | 5.33   | 93  | 4.67   |   |
| 9048 | Klhl9          | -1.14 | 443  | 28.76  | 274 | 25.18  |   |
| 9049 | Zfp1           | -1.14 | 95   | 10.64  | 57  | 9.32   |   |
| 9050 | Prdx1          | -1.14 | 261  | 205.72 | 169 | 180.02 |   |
| 9051 | Psm2           | -1.14 | 383  | 107.48 | 224 | 94.04  |   |
| 9052 | Hiat1_1        | -1.14 | 49   | 27.65  | 38  | 24.18  |   |
| 9053 | RGD1563242     | -1.14 | 99   | 12.73  | 58  | 11.14  |   |
| 9054 | Tgfb1          | -1.14 | 133  | 14.32  | 76  | 12.52  |   |
| 9055 | Rnf14          | -1.14 | 435  | 21.31  | 232 | 18.63  |   |
| 9056 | Tia1           | -1.14 | 201  | 17.52  | 201 | 15.32  |   |
| 9057 | Dctn4          | -1.14 | 303  | 39.32  | 192 | 34.37  |   |
| 9058 | Fkbp15         | -1.14 | 186  | 9.11   | 107 | 7.96   |   |
| 9059 | Fbxw2          | -1.14 | 248  | 18.25  | 166 | 15.95  |   |
| 9060 | Dnajc8         | -1.14 | 189  | 26.24  | 116 | 22.92  |   |
| 9061 | Ran            | -1.14 | 887  | 206.51 | 534 | 180.38 |   |
| 9062 | Vimp           | -1.14 | 231  | 40.73  | 132 | 35.58  |   |
| 9063 | Eif4h          | -1.15 | 949  | 82.41  | 562 | 71.87  |   |
| 9064 | AABR07019083.1 | -1.15 | 16   | 4.9    | 9   | 4.28   |   |
| 9065 | AABR07021501.1 | -1.15 | 36   | 5.6    | 14  | 4.88   |   |
| 9066 | AABR07060133.1 | -1.15 | 44   | 1.01   | 34  | 0.88   |   |
| 9067 | Arglu1         | -1.15 | 293  | 24.66  | 209 | 21.5   |   |



Supplemental Table 2  
Vehicle versus FSH, 24 hours

|      | A              | B     | C   | D     | E   | F     | G |
|------|----------------|-------|-----|-------|-----|-------|---|
| 9068 | Cenpo          | -1.15 | 10  | 2.13  | 6   | 1.86  |   |
| 9069 | Ebpl           | -1.15 | 6   | 1.11  | 3   | 0.97  |   |
| 9070 | Ggt7           | -1.15 | 93  | 7.01  | 51  | 6.11  |   |
| 9071 | Ica1           | -1.15 | 87  | 4.44  | 48  | 3.87  |   |
| 9072 | RGD1560394     | -1.15 | 5   | 1.87  | 3   | 1.63  |   |
| 9073 | Slc4a1ap       | -1.15 | 93  | 5.82  | 66  | 5.08  |   |
| 9074 | AABR07002910.1 | -1.15 | 5   | 0.39  | 3   | 0.34  |   |
| 9075 | AABR07030529.1 | -1.15 | 5   | 8.59  | 3   | 7.49  |   |
| 9076 | AABR07044935.1 | -1.15 | 0   | 0.69  | 0   | 0.6   |   |
| 9077 | AABR07061336.1 | -1.15 | 0   | 2.36  | 0   | 2.06  |   |
| 9078 | AABR07071904.1 | -1.15 | 5   | 0.36  | 3   | 0.31  |   |
| 9079 | Arhgap20       | -1.15 | 7   | 0.18  | 3   | 0.15  |   |
| 9080 | Arx            | -1.15 | 6   | 0.44  | 3   | 0.38  |   |
| 9081 | Cnih1          | -1.15 | 275 | 44.96 | 160 | 39.2  |   |
| 9082 | Cope           | -1.15 | 323 | 64.66 | 200 | 56.38 |   |
| 9083 | Cracr2b_1      | -1.15 | 0   | 0.78  | 0   | 0.68  |   |
| 9084 | Cth            | -1.15 | 4   | 1.37  | 2   | 1.19  |   |
| 9085 | Efna5          | -1.15 | 64  | 3.74  | 21  | 3.26  |   |
| 9086 | Etfa           | -1.15 | 236 | 33.25 | 151 | 28.99 |   |
| 9087 | Fam186a        | -1.15 | 19  | 0.23  | 13  | 0.2   |   |
| 9088 | Fam81a         | -1.15 | 5   | 0.32  | 7   | 0.28  |   |
| 9089 | Gprc5c         | -1.15 | 5   | 0.27  | 5   | 0.24  |   |
| 9090 | Gpx1           | -1.15 | 120 | 32.82 | 70  | 28.62 |   |
| 9091 | Ikbkg          | -1.15 | 53  | 6.87  | 27  | 5.99  |   |
| 9092 | Ispd           | -1.15 | 32  | 0.85  | 40  | 0.74  |   |
| 9093 | Knstrn         | -1.15 | 30  | 3.22  | 16  | 2.8   |   |
| 9094 | LOC100359825   | -1.15 | 1   | 11.22 | 1   | 9.79  |   |
| 9095 | LOC100360150   | -1.15 | 5   | 4.04  | 3   | 3.52  |   |
| 9096 | Mageb7         | -1.15 | 4   | 1.16  | 2   | 1.01  |   |
| 9097 | Mast2          | -1.15 | 683 | 24.07 | 413 | 20.99 |   |
| 9098 | Micu3          | -1.15 | 53  | 2     | 30  | 1.75  |   |
| 9099 | Mplkip         | -1.15 | 57  | 6.18  | 43  | 5.39  |   |
| 9100 | Mpped2         | -1.15 | 213 | 7.43  | 100 | 6.48  |   |
| 9101 | Nup107         | -1.15 | 111 | 7.24  | 70  | 6.32  |   |
| 9102 | Ooep           | -1.15 | 5   | 1.53  | 3   | 1.33  |   |
| 9103 | Pcdhb13        | -1.15 | 5   | 0.52  | 3   | 0.45  |   |
| 9104 | Pcdhga11       | -1.15 | 25  | 2.57  | 15  | 2.24  |   |
| 9105 | Piwil2         | -1.15 | 12  | 0.24  | 14  | 0.21  |   |
| 9106 | Pla2g15        | -1.15 | 74  | 6.4   | 48  | 5.58  |   |
| 9107 | Plgrkt         | -1.15 | 26  | 4.87  | 20  | 4.24  |   |
| 9108 | Pou3f4         | -1.15 | 5   | 0.97  | 3   | 0.85  |   |
| 9109 | Ppih           | -1.15 | 17  | 8.61  | 7   | 7.5   |   |
| 9110 | Rab11fip2      | -1.15 | 31  | 3.09  | 30  | 2.69  |   |
| 9111 | Rbm33          | -1.15 | 283 | 15.35 | 172 | 13.38 |   |
| 9112 | Rbp1           | -1.15 | 8   | 1.79  | 4   | 1.56  |   |
| 9113 | RGD1304624     | -1.15 | 38  | 1.12  | 42  | 0.98  |   |
| 9114 | RGD1561590     | -1.15 | 70  | 57.45 | 51  | 50.09 |   |
| 9115 | Ric8b          | -1.15 | 175 | 6.48  | 146 | 5.65  |   |
| 9116 | Rufy2          | -1.15 | 1   | 2.06  | 1   | 1.79  |   |
| 9117 | SCARNA18_2     | -1.15 | 5   | 15.77 | 3   | 13.75 |   |
| 9118 | Shisa8         | -1.15 | 5   | 0.66  | 4   | 0.57  |   |
| 9119 | Srr            | -1.15 | 134 | 11.04 | 109 | 9.63  |   |
| 9120 | Susd2          | -1.15 | 5   | 0.38  | 3   | 0.33  |   |
| 9121 | Ulk3           | -1.15 | 42  | 5.04  | 23  | 4.4   |   |

Supplemental Table 2  
Vehicle versus FSH, 24 hours

|      | A            | B     | C    | D      | E    | F      | G |
|------|--------------|-------|------|--------|------|--------|---|
| 9122 | Usf1         | -1.15 | 217  | 28.89  | 126  | 25.19  |   |
| 9123 | Wfdc1        | -1.15 | 5    | 0.99   | 4    | 0.86   |   |
| 9124 | Zfp672       | -1.15 | 95   | 7.68   | 63   | 6.69   |   |
| 9125 | Zfr2         | -1.15 | 64   | 1.86   | 39   | 1.62   |   |
| 9126 | Zhx1         | -1.15 | 9    | 2.48   | 5    | 2.16   |   |
| 9127 | Mon1a        | -1.15 | 81   | 4.8    | 41   | 4.18   |   |
| 9128 | Pds5a        | -1.15 | 456  | 19.81  | 303  | 17.25  |   |
| 9129 | Psma1        | -1.15 | 352  | 71.52  | 214  | 62.3   |   |
| 9130 | Rpn2         | -1.15 | 1335 | 124.49 | 794  | 108.37 |   |
| 9131 | Srpk1        | -1.15 | 267  | 23.04  | 175  | 20.05  |   |
| 9132 | Zdhhc5       | -1.15 | 383  | 32.92  | 225  | 28.65  |   |
| 9133 | Atf1         | -1.15 | 259  | 17.75  | 160  | 15.44  |   |
| 9134 | Nabp2        | -1.15 | 116  | 20.06  | 78   | 17.44  |   |
| 9135 | Usp14        | -1.15 | 280  | 25.91  | 175  | 22.52  |   |
| 9136 | Adam19       | -1.15 | 131  | 4.24   | 77   | 3.69   |   |
| 9137 | Sec63        | -1.15 | 496  | 17.91  | 302  | 15.57  |   |
| 9138 | Tmx3         | -1.15 | 125  | 18.42  | 78   | 16     |   |
| 9139 | Zfp236       | -1.15 | 229  | 8.04   | 136  | 6.99   |   |
| 9140 | Vprbp        | -1.15 | 334  | 11.9   | 203  | 10.34  |   |
| 9141 | Stag1        | -1.15 | 451  | 10.43  | 279  | 9.06   |   |
| 9142 | Ddx51        | -1.15 | 92   | 7.51   | 59   | 6.52   |   |
| 9143 | Sh2b3        | -1.15 | 154  | 4.73   | 90   | 4.11   |   |
| 9144 | Sh3bp5       | -1.15 | 112  | 8.01   | 81   | 6.95   |   |
| 9145 | Lysmd3       | -1.15 | 82   | 6.07   | 47   | 5.27   |   |
| 9146 | Eif2ak4      | -1.15 | 256  | 6      | 180  | 5.2    |   |
| 9147 | LOC100359539 | -1.15 | 146  | 19.8   | 101  | 17.17  |   |
| 9148 | Ndufb10      | -1.15 | 131  | 47.06  | 78   | 40.82  |   |
| 9149 | Rab7a        | -1.15 | 654  | 78.43  | 389  | 68.01  |   |
| 9150 | Rhoc         | -1.15 | 257  | 34.78  | 155  | 30.15  |   |
| 9151 | Ofd1         | -1.15 | 76   | 4      | 45   | 3.47   |   |
| 9152 | Eif1ax       | -1.15 | 304  | 21.49  | 180  | 18.62  |   |
| 9153 | Raly         | -1.15 | 871  | 123.62 | 523  | 107.13 |   |
| 9154 | Zbtb11       | -1.15 | 163  | 5.56   | 80   | 4.82   |   |
| 9155 | Flywch1      | -1.15 | 210  | 12.13  | 146  | 10.51  |   |
| 9156 | Klhdc2       | -1.15 | 167  | 32.85  | 97   | 28.47  |   |
| 9157 | Me3          | -1.15 | 348  | 18.52  | 146  | 16.04  |   |
| 9158 | Tnrc6a       | -1.15 | 825  | 20.53  | 506  | 17.78  |   |
| 9159 | Rsrc2        | -1.15 | 228  | 17.18  | 121  | 14.88  |   |
| 9160 | Cops7b       | -1.16 | 87   | 9.38   | 53   | 8.12   |   |
| 9161 | Exoc5        | -1.16 | 230  | 10.82  | 139  | 9.37   |   |
| 9162 | Trps1        | -1.16 | 82   | 2.56   | 53   | 2.21   |   |
| 9163 | B2m          | -1.16 | 542  | 72.83  | 319  | 63.02  |   |
| 9164 | Hax1         | -1.16 | 93   | 19.87  | 54   | 17.2   |   |
| 9165 | Arhgap23     | -1.16 | 412  | 14.64  | 253  | 12.66  |   |
| 9166 | Entpd7_2     | -1.16 | 47   | 8.71   | 26   | 7.53   |   |
| 9167 | Exd2         | -1.16 | 138  | 8.79   | 80   | 7.61   |   |
| 9168 | Gtse1        | -1.16 | 104  | 7.91   | 58   | 6.84   |   |
| 9169 | N4bp2        | -1.16 | 149  | 6.01   | 91   | 5.19   |   |
| 9170 | Sdr39u1      | -1.16 | 64   | 7.14   | 42   | 6.18   |   |
| 9171 | Tada1        | -1.16 | 113  | 8.73   | 64   | 7.55   |   |
| 9172 | Mrpl10       | -1.16 | 89   | 11.31  | 51   | 9.77   |   |
| 9173 | Ywhae        | -1.16 | 1931 | 263.65 | 1175 | 227.91 |   |
| 9174 | Wwp2         | -1.16 | 142  | 11.6   | 96   | 10.03  |   |
| 9175 | Rnf6         | -1.16 | 172  | 19.02  | 99   | 16.44  |   |

Supplemental Table 2  
Vehicle versus FSH, 24 hours

|      | A              | B     | C    | D      | E   | F      | G |
|------|----------------|-------|------|--------|-----|--------|---|
| 9176 | Zswim3         | -1.16 | 59   | 3.43   | 37  | 2.96   |   |
| 9177 | AABR07065406.1 | -1.16 | 26   | 8.55   | 19  | 7.39   |   |
| 9178 | Stradb         | -1.16 | 101  | 7.84   | 64  | 6.78   |   |
| 9179 | Zfp518b        | -1.16 | 106  | 7.28   | 63  | 6.28   |   |
| 9180 | Tarbp2         | -1.16 | 85   | 11.7   | 54  | 10.11  |   |
| 9181 | Ppp3cc         | -1.16 | 316  | 17.99  | 205 | 15.53  |   |
| 9182 | Tram1          | -1.16 | 686  | 53.19  | 440 | 45.91  |   |
| 9183 | Atl3           | -1.16 | 222  | 19.73  | 145 | 17.02  |   |
| 9184 | Edem1          | -1.16 | 347  | 27.2   | 201 | 23.47  |   |
| 9185 | Adamts10       | -1.16 | 804  | 32.76  | 431 | 28.26  |   |
| 9186 | Cln8           | -1.16 | 71   | 7.18   | 44  | 6.19   |   |
| 9187 | Irf2bpl        | -1.16 | 122  | 13.05  | 73  | 11.25  |   |
| 9188 | Alg9           | -1.16 | 174  | 11.8   | 96  | 10.18  |   |
| 9189 | Riok2          | -1.16 | 134  | 14.15  | 80  | 12.2   |   |
| 9190 | Atp8b2         | -1.16 | 1021 | 43.54  | 587 | 37.54  |   |
| 9191 | Ap2b1          | -1.16 | 801  | 48.86  | 519 | 42.13  |   |
| 9192 | Acsl3          | -1.16 | 158  | 13.48  | 94  | 11.62  |   |
| 9193 | Rbm12_1        | -1.16 | 36   | 15.46  | 24  | 13.33  |   |
| 9194 | Gpalpp1        | -1.16 | 73   | 9.87   | 44  | 8.5    |   |
| 9195 | Uba3           | -1.16 | 336  | 33.95  | 196 | 29.27  |   |
| 9196 | Zfp142         | -1.16 | 308  | 8.96   | 190 | 7.72   |   |
| 9197 | Pbx1           | -1.16 | 474  | 46.15  | 315 | 39.77  |   |
| 9198 | Copb2          | -1.16 | 442  | 46.17  | 263 | 39.79  |   |
| 9199 | Yy1            | -1.16 | 309  | 36.73  | 186 | 31.66  |   |
| 9200 | Cdkn2aip       | -1.16 | 91   | 9.51   | 53  | 8.19   |   |
| 9201 | Syap1          | -1.16 | 247  | 18.88  | 148 | 16.27  |   |
| 9202 | ldh2           | -1.16 | 503  | 51.89  | 320 | 44.71  |   |
| 9203 | LOC100911363   | -1.16 | 0    | 84.76  | 0   | 73.01  |   |
| 9204 | Cse1l          | -1.16 | 410  | 26.62  | 248 | 22.93  |   |
| 9205 | Dph7           | -1.16 | 53   | 4.67   | 39  | 4.02   |   |
| 9206 | Cep85l         | -1.16 | 41   | 2.11   | 34  | 1.82   |   |
| 9207 | Elovl4         | -1.16 | 30   | 2.19   | 17  | 1.88   |   |
| 9208 | Fam213a        | -1.16 | 31   | 4.28   | 21  | 3.68   |   |
| 9209 | ldh3B          | -1.16 | 233  | 35.74  | 136 | 30.77  |   |
| 9210 | Invs           | -1.16 | 50   | 1.98   | 40  | 1.71   |   |
| 9211 | Micalcl        | -1.16 | 35   | 2.03   | 23  | 1.74   |   |
| 9212 | Slc4a4         | -1.16 | 61   | 1.46   | 31  | 1.25   |   |
| 9213 | Morc3          | -1.16 | 309  | 10.88  | 210 | 9.36   |   |
| 9214 | Snx6           | -1.16 | 206  | 20.23  | 137 | 17.41  |   |
| 9215 | Mms19          | -1.16 | 172  | 9.33   | 113 | 8.03   |   |
| 9216 | Wrn            | -1.16 | 178  | 7.01   | 127 | 6.04   |   |
| 9217 | Fnta           | -1.16 | 209  | 26.52  | 126 | 22.82  |   |
| 9218 | Dhx33          | -1.16 | 81   | 6.97   | 47  | 6      |   |
| 9219 | RGD1305455     | -1.16 | 65   | 2.91   | 41  | 2.5    |   |
| 9220 | Polr2f         | -1.16 | 76   | 30.2   | 45  | 25.99  |   |
| 9221 | RGD1305464     | -1.16 | 131  | 7.78   | 81  | 6.69   |   |
| 9222 | Trim36         | -1.16 | 66   | 4.33   | 44  | 3.73   |   |
| 9223 | Ube2j2         | -1.16 | 223  | 20.35  | 153 | 17.5   |   |
| 9224 | Kif3c          | -1.16 | 83   | 5.17   | 62  | 4.45   |   |
| 9225 | Tfpi           | -1.16 | 175  | 9.14   | 111 | 7.86   |   |
| 9226 | LOC100910454   | -1.16 | 551  | 35.07  | 317 | 30.14  |   |
| 9227 | Gnas_2         | -1.16 | 1377 | 119.26 | 864 | 102.48 |   |
| 9228 | G3bp1          | -1.16 | 893  | 32.76  | 537 | 28.14  |   |
| 9229 | Nedd1          | -1.16 | 82   | 4.26   | 54  | 3.66   |   |

Supplemental Table 2  
Vehicle versus FSH, 24 hours

|      | A              | B     | C    | D      | E    | F      | G |
|------|----------------|-------|------|--------|------|--------|---|
| 9230 | Tipin1         | -1.16 | 30   | 9.31   | 21   | 7.99   |   |
| 9231 | AC094643.2     | -1.16 | 44   | 12.26  | 26   | 10.53  |   |
| 9232 | Ccdc25         | -1.16 | 76   | 7.67   | 47   | 6.59   |   |
| 9233 | Glrx2          | -1.16 | 32   | 11.56  | 21   | 9.93   |   |
| 9234 | Manea          | -1.16 | 226  | 12.12  | 129  | 10.4   |   |
| 9235 | Pla2g4a        | -1.16 | 32   | 1.62   | 19   | 1.39   |   |
| 9236 | Rasl11a        | -1.16 | 116  | 21.5   | 69   | 18.46  |   |
| 9237 | Smc1a          | -1.16 | 411  | 22.25  | 278  | 19.1   |   |
| 9238 | Trdmt1         | -1.16 | 46   | 2.72   | 30   | 2.33   |   |
| 9239 | Usp43          | -1.16 | 29   | 1.76   | 20   | 1.51   |   |
| 9240 | Soat1          | -1.17 | 680  | 76.97  | 413  | 66.03  |   |
| 9241 | Kdm1a          | -1.17 | 469  | 32     | 280  | 27.45  |   |
| 9242 | RGD1308106     | -1.17 | 285  | 14.36  | 177  | 12.32  |   |
| 9243 | Ifih1          | -1.17 | 65   | 3.9    | 37   | 3.34   |   |
| 9244 | Tmem9b         | -1.17 | 92   | 5.61   | 71   | 4.82   |   |
| 9245 | Xrcc6          | -1.17 | 119  | 6.9    | 84   | 5.92   |   |
| 9246 | Psmc5          | -1.17 | 229  | 42.95  | 139  | 36.83  |   |
| 9247 | RGD1564887     | -1.17 | 100  | 7.79   | 83   | 6.68   |   |
| 9248 | Slc27a4        | -1.17 | 232  | 17.63  | 136  | 15.11  |   |
| 9249 | Dhx15          | -1.17 | 492  | 45.66  | 318  | 39.13  |   |
| 9250 | Dgke           | -1.17 | 57   | 3.19   | 36   | 2.73   |   |
| 9251 | Emb            | -1.17 | 41   | 9.12   | 27   | 7.81   |   |
| 9252 | Mxra7          | -1.17 | 246  | 17.48  | 147  | 14.98  |   |
| 9253 | Pold2          | -1.17 | 41   | 5.74   | 24   | 4.92   |   |
| 9254 | Polr3h         | -1.17 | 128  | 24.09  | 84   | 20.65  |   |
| 9255 | Smarcc1        | -1.17 | 568  | 30.31  | 387  | 25.98  |   |
| 9256 | Tdp1           | -1.17 | 49   | 3.78   | 30   | 3.24   |   |
| 9257 | Terf2ip        | -1.17 | 86   | 8.81   | 51   | 7.55   |   |
| 9258 | Ubap2l         | -1.17 | 1085 | 52.72  | 648  | 45.17  |   |
| 9259 | Rpsa           | -1.17 | 2052 | 633.33 | 1240 | 542.57 |   |
| 9260 | Rcan1          | -1.17 | 109  | 10.98  | 66   | 9.4    |   |
| 9261 | Dusp7          | -1.17 | 60   | 4.47   | 35   | 3.82   |   |
| 9262 | Rhot1          | -1.17 | 341  | 7.89   | 222  | 6.75   |   |
| 9263 | Mad11l         | -1.17 | 114  | 6.96   | 96   | 5.96   |   |
| 9264 | Tmtc3          | -1.17 | 214  | 8.08   | 133  | 6.91   |   |
| 9265 | Ndufb6         | -1.17 | 101  | 42.39  | 58   | 36.26  |   |
| 9266 | Ythdf3         | -1.17 | 491  | 23.36  | 276  | 19.98  |   |
| 9267 | Egln2          | -1.17 | 261  | 21.94  | 168  | 18.77  |   |
| 9268 | Adamts6        | -1.17 | 114  | 2.41   | 47   | 2.06   |   |
| 9269 | AABR07057196.1 | -1.17 | 9    | 2.8    | 5    | 2.39   |   |
| 9270 | Ank2           | -1.17 | 64   | 0.68   | 38   | 0.58   |   |
| 9271 | Atxn7          | -1.17 | 112  | 6.05   | 78   | 5.17   |   |
| 9272 | Etfb           | -1.17 | 42   | 9.33   | 29   | 7.98   |   |
| 9273 | Sec13          | -1.17 | 205  | 36.78  | 123  | 31.43  |   |
| 9274 | Zfp664         | -1.17 | 16   | 16.17  | 9    | 13.82  |   |
| 9275 | Wdr53          | -1.17 | 25   | 2.9    | 16   | 2.48   |   |
| 9276 | Srebf2         | -1.17 | 1445 | 62.2   | 836  | 53.14  |   |
| 9277 | Gak            | -1.17 | 400  | 20.09  | 234  | 17.16  |   |
| 9278 | Cep350         | -1.17 | 215  | 4.77   | 131  | 4.07   |   |
| 9279 | Nup98          | -1.17 | 669  | 21.5   | 420  | 18.35  |   |
| 9280 | Mrps7          | -1.17 | 67   | 19.99  | 44   | 17.07  |   |
| 9281 | Dctn5          | -1.17 | 108  | 12.09  | 60   | 10.32  |   |
| 9282 | LOC100910429   | -1.17 | 242  | 10.52  | 153  | 8.98   |   |
| 9283 | Gars           | -1.17 | 871  | 85.44  | 522  | 72.93  |   |

Supplemental Table 2  
Vehicle versus FSH, 24 hours

|      | A          | B     | C    | D      | E    | F      | G |
|------|------------|-------|------|--------|------|--------|---|
| 9284 | Wdr83os    | -1.17 | 149  | 51.56  | 87   | 44.01  |   |
| 9285 | Gnai2      | -1.17 | 1830 | 198.95 | 1048 | 169.78 |   |
| 9286 | Dnajb1     | -1.17 | 235  | 26.09  | 136  | 22.27  |   |
| 9287 | Sgce       | -1.17 | 233  | 29.67  | 138  | 25.31  |   |
| 9288 | Tusc3      | -1.17 | 222  | 21.06  | 147  | 17.96  |   |
| 9289 | Dlg1       | -1.17 | 332  | 14.53  | 244  | 12.39  |   |
| 9290 | Pura       | -1.17 | 75   | 21.55  | 42   | 18.37  |   |
| 9291 | Cdk10      | -1.17 | 138  | 11.82  | 81   | 10.07  |   |
| 9292 | Pcdh18     | -1.17 | 108  | 5      | 67   | 4.27   |   |
| 9293 | Fnbp4      | -1.17 | 464  | 18.27  | 281  | 15.57  |   |
| 9294 | Cpq        | -1.17 | 236  | 18.94  | 133  | 16.13  |   |
| 9295 | Gins4      | -1.17 | 43   | 6.85   | 26   | 5.83   |   |
| 9296 | Josd2      | -1.17 | 33   | 8.5    | 23   | 7.24   |   |
| 9297 | Mllt1      | -1.17 | 300  | 17.48  | 175  | 14.89  |   |
| 9298 | Mmab       | -1.17 | 42   | 2.28   | 18   | 1.94   |   |
| 9299 | Ubald2     | -1.17 | 35   | 14.69  | 16   | 12.51  |   |
| 9300 | Zfp35      | -1.17 | 62   | 5.14   | 33   | 4.38   |   |
| 9301 | Lmln       | -1.17 | 87   | 3.3    | 49   | 2.81   |   |
| 9302 | Rabgap1l   | -1.17 | 150  | 3.88   | 104  | 3.31   |   |
| 9303 | Trmt12     | -1.17 | 29   | 4.45   | 17   | 3.79   |   |
| 9304 | Pbrm1      | -1.17 | 538  | 20.68  | 343  | 17.62  |   |
| 9305 | Ddx46      | -1.17 | 403  | 22.48  | 258  | 19.14  |   |
| 9306 | Twf1       | -1.17 | 251  | 25.75  | 163  | 21.92  |   |
| 9307 | RGD1560175 | -1.17 | 150  | 4.87   | 83   | 4.15   |   |
| 9308 | Smdt1      | -1.17 | 75   | 53.83  | 41   | 45.82  |   |
| 9309 | Ift20      | -1.18 | 118  | 24.56  | 67   | 20.9   |   |
| 9310 | LOC688963  | -1.18 | 57   | 45     | 48   | 38.28  |   |
| 9311 | Pard3b     | -1.18 | 168  | 2.83   | 125  | 2.41   |   |
| 9312 | Cenpn      | -1.18 | 82   | 3.71   | 48   | 3.16   |   |
| 9313 | Limch1     | -1.18 | 75   | 2.61   | 51   | 2.22   |   |
| 9314 | Gabarap    | -1.18 | 466  | 140.35 | 275  | 119.37 |   |
| 9315 | Chmp5      | -1.18 | 177  | 27.75  | 101  | 23.59  |   |
| 9316 | E2f1       | -1.18 | 91   | 2.93   | 92   | 2.49   |   |
| 9317 | Rab11fip5  | -1.18 | 288  | 13.48  | 155  | 11.46  |   |
| 9318 | Zfp26      | -1.18 | 113  | 7.69   | 65   | 6.54   |   |
| 9319 | Actl6a     | -1.18 | 245  | 18.37  | 153  | 15.62  |   |
| 9320 | Tp53bp2    | -1.18 | 177  | 9.34   | 109  | 7.94   |   |
| 9321 | Psmd4      | -1.18 | 382  | 58.56  | 226  | 49.77  |   |
| 9322 | Emd        | -1.18 | 181  | 28.87  | 107  | 24.53  |   |
| 9323 | Pkp4       | -1.18 | 147  | 6.66   | 86   | 5.66   |   |
| 9324 | Wdr35      | -1.18 | 139  | 7.01   | 79   | 5.96   |   |
| 9325 | Htra1      | -1.18 | 706  | 78.77  | 390  | 66.92  |   |
| 9326 | Sfxn1      | -1.18 | 199  | 13.78  | 112  | 11.7   |   |
| 9327 | Ubr1       | -1.18 | 256  | 11.12  | 159  | 9.44   |   |
| 9328 | Zc3hc1     | -1.18 | 110  | 12.16  | 70   | 10.32  |   |
| 9329 | Srsf10     | -1.18 | 189  | 23.62  | 150  | 20.05  |   |
| 9330 | Dennd5a    | -1.18 | 849  | 39.99  | 484  | 33.94  |   |
| 9331 | Akirin2    | -1.18 | 173  | 24.87  | 116  | 21.1   |   |
| 9332 | Hk2        | -1.18 | 199  | 8.49   | 120  | 7.2    |   |
| 9333 | Caprin1    | -1.18 | 1427 | 91.32  | 857  | 77.45  |   |
| 9334 | Taok2      | -1.18 | 480  | 17.8   | 314  | 15.09  |   |
| 9335 | Asf1b      | -1.18 | 24   | 3.77   | 15   | 3.2    |   |
| 9336 | Dynlt3     | -1.18 | 72   | 8.36   | 43   | 7.09   |   |
| 9337 | Fbxl3      | -1.18 | 179  | 10.04  | 104  | 8.51   |   |

Supplemental Table 2  
Vehicle versus FSH, 24 hours

|      | A            | B     | C    | D      | E   | F      | G |
|------|--------------|-------|------|--------|-----|--------|---|
| 9338 | Imp3         | -1.18 | 36   | 6.22   | 21  | 5.27   |   |
| 9339 | Polk         | -1.18 | 38   | 1.57   | 25  | 1.33   |   |
| 9340 | Rabl3        | -1.18 | 47   | 4.57   | 26  | 3.88   |   |
| 9341 | Traip        | -1.18 | 31   | 2.72   | 20  | 2.31   |   |
| 9342 | Lpgat1       | -1.18 | 102  | 6.36   | 61  | 5.39   |   |
| 9343 | Mrpl46       | -1.18 | 48   | 5.67   | 29  | 4.8    |   |
| 9344 | Pbk          | -1.18 | 25   | 3.27   | 18  | 2.77   |   |
| 9345 | Ppp1r3d      | -1.18 | 12   | 0.97   | 7   | 0.83   |   |
| 9346 | Ptpdc1       | -1.18 | 19   | 0.89   | 13  | 0.75   |   |
| 9347 | Rab26        | -1.18 | 16   | 1.29   | 8   | 1.09   |   |
| 9348 | Smad2        | -1.18 | 291  | 16.49  | 171 | 13.97  |   |
| 9349 | Uchl5        | -1.18 | 101  | 4.26   | 53  | 3.61   |   |
| 9350 | Setd5        | -1.18 | 1322 | 34.29  | 730 | 29.07  |   |
| 9351 | Ssrp1        | -1.18 | 866  | 70.44  | 515 | 59.7   |   |
| 9352 | Efemp2       | -1.18 | 536  | 77.14  | 314 | 65.37  |   |
| 9353 | Cdv3         | -1.18 | 207  | 33.64  | 130 | 28.49  |   |
| 9354 | Micu2        | -1.18 | 424  | 21.11  | 289 | 17.88  |   |
| 9355 | Vamp3        | -1.18 | 334  | 41.7   | 188 | 35.31  |   |
| 9356 | Uba2         | -1.18 | 111  | 35.4   | 82  | 29.97  |   |
| 9357 | Git2         | -1.18 | 445  | 24.65  | 271 | 20.87  |   |
| 9358 | Cmtm6        | -1.18 | 380  | 27.87  | 219 | 23.59  |   |
| 9359 | LOC100910568 | -1.18 | 251  | 3.38   | 152 | 2.86   |   |
| 9360 | Papd7        | -1.18 | 262  | 14.68  | 139 | 12.42  |   |
| 9361 | Tjp1         | -1.18 | 796  | 27.05  | 459 | 22.87  |   |
| 9362 | Polh         | -1.18 | 83   | 4.31   | 43  | 3.64   |   |
| 9363 | Tmem134      | -1.18 | 124  | 30.15  | 86  | 25.49  |   |
| 9364 | Mrpl23       | -1.18 | 116  | 45.22  | 72  | 38.22  |   |
| 9365 | Aspm         | -1.18 | 94   | 2.2    | 50  | 1.86   |   |
| 9366 | Rbm41        | -1.18 | 73   | 1.92   | 47  | 1.62   |   |
| 9367 | Rps6kb2      | -1.18 | 53   | 6.02   | 28  | 5.08   |   |
| 9368 | Ndufb3       | -1.18 | 34   | 15.07  | 26  | 12.73  |   |
| 9369 | Map1lc3a     | -1.18 | 375  | 96.43  | 221 | 81.46  |   |
| 9370 | Fanci        | -1.18 | 135  | 4.61   | 92  | 3.89   |   |
| 9371 | Nf1          | -1.18 | 650  | 11.54  | 377 | 9.74   |   |
| 9372 | Cipc         | -1.18 | 204  | 11.19  | 120 | 9.45   |   |
| 9373 | Psmb5        | -1.18 | 353  | 102.18 | 194 | 86.27  |   |
| 9374 | Arfgap1      | -1.18 | 258  | 27.73  | 156 | 23.41  |   |
| 9375 | Gmeb1        | -1.18 | 162  | 7.31   | 97  | 6.17   |   |
| 9376 | Ankle2       | -1.19 | 384  | 15.11  | 244 | 12.75  |   |
| 9377 | Cd24         | -1.19 | 51   | 8.37   | 28  | 7.06   |   |
| 9378 | Dcaf17       | -1.19 | 39   | 3.85   | 34  | 3.25   |   |
| 9379 | Ypel4        | -1.19 | 46   | 2.29   | 24  | 1.94   |   |
| 9380 | Arhgap5      | -1.19 | 461  | 20.94  | 280 | 17.67  |   |
| 9381 | Tmem194b     | -1.19 | 103  | 6.12   | 61  | 5.16   |   |
| 9382 | Snx27        | -1.19 | 387  | 13.06  | 212 | 11.01  |   |
| 9383 | Zbtb38       | -1.19 | 131  | 8.15   | 76  | 6.87   |   |
| 9384 | Tubb4b       | -1.19 | 891  | 139.79 | 519 | 117.83 |   |
| 9385 | Gdap2        | -1.19 | 63   | 4.59   | 39  | 3.87   |   |
| 9386 | Mad2l2       | -1.19 | 59   | 8.28   | 36  | 6.98   |   |
| 9387 | Stxbp1       | -1.19 | 151  | 10.36  | 91  | 8.73   |   |
| 9388 | Alg13        | -1.19 | 63   | 2.24   | 36  | 1.89   |   |
| 9389 | Eif4e        | -1.19 | 289  | 28.04  | 164 | 23.63  |   |
| 9390 | Ppp1r2       | -1.19 | 262  | 29.95  | 150 | 25.24  |   |
| 9391 | Gmip         | -1.19 | 83   | 4.4    | 51  | 3.7    |   |

Supplemental Table 2  
Vehicle versus FSH, 24 hours

|      | A          | B     | C    | D      | E    | F      | G |
|------|------------|-------|------|--------|------|--------|---|
| 9392 | Eif4a1     | -1.19 | 2023 | 372.06 | 1201 | 313.18 |   |
| 9393 | Eif5a      | -1.19 | 2030 | 435.26 | 1172 | 366.3  |   |
| 9394 | Abhd10_1   | -1.19 | 0    | 3.53   | 0    | 2.97   |   |
| 9395 | Mrps18c    | -1.19 | 41   | 11.7   | 23   | 9.85   |   |
| 9396 | Rab21      | -1.19 | 115  | 15.96  | 64   | 13.43  |   |
| 9397 | Klhl36     | -1.19 | 25   | 1.83   | 20   | 1.54   |   |
| 9398 | Mboat1     | -1.19 | 101  | 4.98   | 62   | 4.19   |   |
| 9399 | Med28      | -1.19 | 103  | 11.33  | 59   | 9.53   |   |
| 9400 | Plekha1    | -1.19 | 168  | 7.97   | 98   | 6.7    |   |
| 9401 | Cdc73      | -1.19 | 138  | 12.28  | 86   | 10.32  |   |
| 9402 | Fbxw8      | -1.19 | 340  | 14.22  | 211  | 11.95  |   |
| 9403 | Usp53      | -1.19 | 132  | 4.45   | 79   | 3.73   |   |
| 9404 | Zwint      | -1.19 | 629  | 71.58  | 343  | 60.11  |   |
| 9405 | Rpl31      | -1.19 | 80   | 121.75 | 43   | 102.23 |   |
| 9406 | Adamts1    | -1.19 | 771  | 43.32  | 440  | 36.37  |   |
| 9407 | Ssh2       | -1.19 | 68   | 1.77   | 41   | 1.48   |   |
| 9408 | Polr3e     | -1.19 | 157  | 9.61   | 84   | 8.07   |   |
| 9409 | Cdca4      | -1.19 | 234  | 20.97  | 125  | 17.59  |   |
| 9410 | Rps6kb1    | -1.19 | 168  | 10.6   | 96   | 8.89   |   |
| 9411 | LOC679811  | -1.19 | 504  | 17.21  | 246  | 14.43  |   |
| 9412 | Sec24c     | -1.19 | 634  | 33.95  | 372  | 28.48  |   |
| 9413 | Rac1       | -1.19 | 630  | 128.56 | 350  | 107.79 |   |
| 9414 | Hspbap1    | -1.19 | 161  | 4.38   | 112  | 3.67   |   |
| 9415 | Ankra2     | -1.19 | 0    | 3.34   | 0    | 2.8    |   |
| 9416 | Ccdc93     | -1.19 | 61   | 5.45   | 44   | 4.57   |   |
| 9417 | Fadd       | -1.19 | 27   | 4.88   | 15   | 4.09   |   |
| 9418 | Mrps18a    | -1.19 | 48   | 21.67  | 30   | 18.16  |   |
| 9419 | Rpo1-3     | -1.19 | 167  | 13.64  | 126  | 11.43  |   |
| 9420 | Sumo2l     | -1.19 | 19   | 6.52   | 10   | 5.46   |   |
| 9421 | Traf3ip1   | -1.19 | 64   | 2.68   | 44   | 2.25   |   |
| 9422 | Wdr20      | -1.19 | 203  | 4.61   | 118  | 3.86   |   |
| 9423 | Dopey2     | -1.19 | 206  | 5.35   | 124  | 4.48   |   |
| 9424 | Srp68      | -1.19 | 361  | 25.12  | 223  | 21.05  |   |
| 9425 | Psmb6      | -1.19 | 23   | 86.18  | 14   | 72.21  |   |
| 9426 | Snrpb2     | -1.19 | 121  | 26.85  | 73   | 22.5   |   |
| 9427 | Thop1      | -1.19 | 88   | 8.51   | 50   | 7.13   |   |
| 9428 | Eif4enif1  | -1.19 | 245  | 16.22  | 148  | 13.58  |   |
| 9429 | Ube3a      | -1.19 | 314  | 9.79   | 197  | 8.2    |   |
| 9430 | Csnk1g2    | -1.19 | 571  | 50.97  | 322  | 42.67  |   |
| 9431 | Fkbp11     | -1.19 | 928  | 47.26  | 522  | 39.57  |   |
| 9432 | Ppp4r2     | -1.19 | 368  | 15.33  | 216  | 12.83  |   |
| 9433 | Rhbf1      | -1.19 | 291  | 21.25  | 161  | 17.79  |   |
| 9434 | Dnajb11    | -1.2  | 291  | 37.5   | 168  | 31.38  |   |
| 9435 | Hspa9      | -1.2  | 576  | 71.3   | 330  | 59.66  |   |
| 9436 | Ccdc130    | -1.2  | 53   | 4.96   | 40   | 4.15   |   |
| 9437 | Dbr1       | -1.2  | 79   | 7.01   | 44   | 5.86   |   |
| 9438 | Hmbox1     | -1.2  | 366  | 12.68  | 232  | 10.61  |   |
| 9439 | Mettl4     | -1.2  | 36   | 2.3    | 22   | 1.92   |   |
| 9440 | Rdh10      | -1.2  | 50   | 2.79   | 27   | 2.34   |   |
| 9441 | RGD1311863 | -1.2  | 58   | 6.05   | 42   | 5.06   |   |
| 9442 | Rora       | -1.2  | 77   | 4.87   | 66   | 4.07   |   |
| 9443 | Taf7       | -1.2  | 34   | 4.66   | 19   | 3.9    |   |
| 9444 | Sec11a     | -1.2  | 262  | 43.98  | 143  | 36.78  |   |
| 9445 | Eif3a      | -1.2  | 1162 | 55.08  | 679  | 46.06  |   |

Supplemental Table 2  
Vehicle versus FSH, 24 hours

|      | A              | B    | C    | D       | E    | F       | G |
|------|----------------|------|------|---------|------|---------|---|
| 9446 | Zfp382         | -1.2 | 155  | 2.87    | 74   | 2.4     |   |
| 9447 | LOC500028      | -1.2 | 135  | 10.6    | 76   | 8.86    |   |
| 9448 | Plxnb2         | -1.2 | 2851 | 107.96  | 1636 | 90.23   |   |
| 9449 | Ankrd27        | -1.2 | 268  | 11.19   | 154  | 9.35    |   |
| 9450 | AABR07002120.1 | -1.2 | 10   | 6.75    | 4    | 5.64    |   |
| 9451 | Ksr1           | -1.2 | 115  | 4.78    | 88   | 3.99    |   |
| 9452 | Tmem138        | -1.2 | 52   | 6.4     | 27   | 5.35    |   |
| 9453 | Eef1a1         | -1.2 | 2639 | 2297.38 | 1825 | 1919.04 |   |
| 9454 | Gopc           | -1.2 | 118  | 7.46    | 71   | 6.23    |   |
| 9455 | Lcor           | -1.2 | 365  | 3.64    | 198  | 3.04    |   |
| 9456 | Frmf3          | -1.2 | 229  | 5.78    | 230  | 4.83    |   |
| 9457 | Ruvbl1         | -1.2 | 115  | 21.45   | 94   | 17.9    |   |
| 9458 | Odc1           | -1.2 | 710  | 47.9    | 410  | 39.98   |   |
| 9459 | Nhp211         | -1.2 | 22   | 22.35   | 7    | 18.64   |   |
| 9460 | Rtcd1          | -1.2 | 202  | 26.09   | 123  | 21.77   |   |
| 9461 | Atp5j          | -1.2 | 89   | 48.24   | 50   | 40.23   |   |
| 9462 | Tubb5          | -1.2 | 5361 | 622.57  | 3077 | 519.09  |   |
| 9463 | Cep57          | -1.2 | 88   | 6.08    | 52   | 5.07    |   |
| 9464 | LOC690422      | -1.2 | 66   | 2.68    | 40   | 2.24    |   |
| 9465 | Mettl13        | -1.2 | 74   | 4.22    | 46   | 3.52    |   |
| 9466 | RGD1562136     | -1.2 | 148  | 11.77   | 85   | 9.81    |   |
| 9467 | Sub1           | -1.2 | 123  | 42.52   | 66   | 35.44   |   |
| 9468 | Khdrbs1        | -1.2 | 639  | 55.5    | 362  | 46.26   |   |
| 9469 | Lrrtm3         | -1.2 | 441  | 2.21    | 105  | 1.84    |   |
| 9470 | Mrps22         | -1.2 | 101  | 13.67   | 66   | 11.4    |   |
| 9471 | Dido1          | -1.2 | 523  | 12.61   | 304  | 10.51   |   |
| 9472 | Btaf1          | -1.2 | 355  | 8.82    | 201  | 7.35    |   |
| 9473 | Plekho2        | -1.2 | 99   | 10.48   | 57   | 8.73    |   |
| 9474 | Sft2d2         | -1.2 | 532  | 24.23   | 302  | 20.18   |   |
| 9475 | AABR07065438.1 | -1.2 | 35   | 69.51   | 21   | 57.88   |   |
| 9476 | AABR07033564.1 | -1.2 | 67   | 4.06    | 33   | 3.38    |   |
| 9477 | Esco1          | -1.2 | 153  | 7.06    | 115  | 5.88    |   |
| 9478 | Lmbrd2         | -1.2 | 125  | 8.19    | 70   | 6.81    |   |
| 9479 | Rhobtb3        | -1.2 | 204  | 7.68    | 115  | 6.39    |   |
| 9480 | Wasf2          | -1.2 | 194  | 14.5    | 122  | 12.06   |   |
| 9481 | Numb           | -1.2 | 266  | 21.04   | 143  | 17.5    |   |
| 9482 | Slx4           | -1.2 | 306  | 10.09   | 180  | 8.39    |   |
| 9483 | AABR07062129.1 | -1.2 | 6    | 2.45    | 3    | 2.04    |   |
| 9484 | AABR07012054.1 | -1.2 | 7    | 2.15    | 4    | 1.79    |   |
| 9485 | AABR07062154.1 | -1.2 | 3    | 1.11    | 2    | 0.92    |   |
| 9486 | AABR07071395.1 | -1.2 | 7    | 0.9     | 4    | 0.75    |   |
| 9487 | Aimp2          | -1.2 | 123  | 17.81   | 76   | 14.79   |   |
| 9488 | Brox           | -1.2 | 308  | 19.32   | 172  | 16.04   |   |
| 9489 | Cep295         | -1.2 | 148  | 2.73    | 89   | 2.26    |   |
| 9490 | Ebp            | -1.2 | 70   | 13.24   | 38   | 10.99   |   |
| 9491 | Egfl7          | -1.2 | 8    | 1.2     | 7    | 0.99    |   |
| 9492 | Fam46b         | -1.2 | 7    | 0.69    | 4    | 0.57    |   |
| 9493 | Haghl          | -1.2 | 8    | 1.38    | 5    | 1.15    |   |
| 9494 | Itga7          | -1.2 | 7    | 0.34    | 5    | 0.29    |   |
| 9495 | LOC100361139   | -1.2 | 88   | 50.68   | 49   | 42.08   |   |
| 9496 | LOC683844      | -1.2 | 0    | 3.75    | 0    | 3.11    |   |
| 9497 | Lym2           | -1.2 | 35   | 5.63    | 20   | 4.68    |   |
| 9498 | Ncf2           | -1.2 | 13   | 0.92    | 8    | 0.76    |   |
| 9499 | Pcdhga2        | -1.2 | 15   | 1.44    | 9    | 1.19    |   |



Supplemental Table 2  
Vehicle versus FSH, 24 hours

|      | A            | B     | C     | D      | E    | F      | G |
|------|--------------|-------|-------|--------|------|--------|---|
| 9500 | Pdk4         | -1.2  | 23    | 3.33   | 12   | 2.76   |   |
| 9501 | Rab7b        | -1.2  | 78    | 6.08   | 45   | 5.05   |   |
| 9502 | RGD1359158   | -1.2  | 55    | 6.47   | 43   | 5.37   |   |
| 9503 | Slc39a13     | -1.2  | 99    | 9.41   | 52   | 7.81   |   |
| 9504 | Adra1d       | -1.2  | 10    | 0.59   | 4    | 0.49   |   |
| 9505 | Aldoc        | -1.2  | 28    | 4.14   | 16   | 3.44   |   |
| 9506 | Ccdc116      | -1.2  | 8     | 0.89   | 5    | 0.74   |   |
| 9507 | Crb2         | -1.2  | 7     | 0.45   | 5    | 0.38   |   |
| 9508 | Dhrs13       | -1.2  | 37    | 7.84   | 21   | 6.51   |   |
| 9509 | Espl1        | -1.2  | 67    | 2.55   | 38   | 2.12   |   |
| 9510 | Fam83d       | -1.2  | 33    | 3.1    | 17   | 2.57   |   |
| 9511 | Gmppb        | -1.2  | 83    | 10.88  | 49   | 9.04   |   |
| 9512 | Krr1         | -1.2  | 68    | 9.47   | 47   | 7.86   |   |
| 9513 | LOC100912195 | -1.2  | 43    | 14.76  | 24   | 12.26  |   |
| 9514 | Mrps35       | -1.2  | 61    | 5.46   | 34   | 4.53   |   |
| 9515 | Oas1k        | -1.2  | 9     | 0.34   | 7    | 0.28   |   |
| 9516 | Ppl          | -1.2  | 18    | 0.56   | 10   | 0.46   |   |
| 9517 | Rnft2        | -1.2  | 36    | 1.25   | 17   | 1.04   |   |
| 9518 | Rpl35a_2     | -1.2  | 0     | 10.48  | 0    | 8.7    |   |
| 9519 | Rpl39_4      | -1.2  | 0     | 11.18  | 0    | 9.28   |   |
| 9520 | Rpl39_6      | -1.2  | 0     | 11.18  | 0    | 9.28   |   |
| 9521 | Tsen2        | -1.2  | 64    | 2.46   | 52   | 2.05   |   |
| 9522 | Sdhb         | -1.21 | 463   | 91.28  | 264  | 75.74  |   |
| 9523 | Banf1        | -1.21 | 184   | 64.66  | 108  | 53.62  |   |
| 9524 | Sart3        | -1.21 | 210   | 10.28  | 130  | 8.52   |   |
| 9525 | Dag1         | -1.21 | 10242 | 493.52 | 5826 | 408.79 |   |
| 9526 | Nasp         | -1.21 | 271   | 18.73  | 146  | 15.51  |   |
| 9527 | Slc20a2      | -1.21 | 209   | 5.75   | 168  | 4.76   |   |
| 9528 | Saraf        | -1.21 | 413   | 53.14  | 238  | 43.99  |   |
| 9529 | Chuk         | -1.21 | 197   | 9.18   | 125  | 7.6    |   |
| 9530 | Kif1b        | -1.21 | 1375  | 16.26  | 826  | 13.46  |   |
| 9531 | Ndufaf3      | -1.21 | 67    | 9.83   | 38   | 8.13   |   |
| 9532 | Rsf1         | -1.21 | 265   | 10.92  | 168  | 9.03   |   |
| 9533 | Zfp207       | -1.21 | 611   | 80.3   | 340  | 66.41  |   |
| 9534 | Hdgfrp2      | -1.21 | 281   | 24.94  | 163  | 20.62  |   |
| 9535 | RGD1311847   | -1.21 | 80    | 6.28   | 52   | 5.19   |   |
| 9536 | Eif3i-ps1    | -1.21 | 204   | 56.97  | 108  | 47.1   |   |
| 9537 | Blm          | -1.21 | 68    | 2.84   | 48   | 2.35   |   |
| 9538 | St6galnac4   | -1.21 | 179   | 12.85  | 105  | 10.62  |   |
| 9539 | Ippk         | -1.21 | 85    | 4.27   | 48   | 3.53   |   |
| 9540 | Naa16        | -1.21 | 104   | 3.46   | 68   | 2.86   |   |
| 9541 | Wdr36        | -1.21 | 180   | 13.98  | 100  | 11.55  |   |
| 9542 | Dedd         | -1.21 | 99    | 20.97  | 59   | 17.32  |   |
| 9543 | Ccdc112      | -1.21 | 68    | 4.94   | 39   | 4.08   |   |
| 9544 | LOC100910414 | -1.21 | 0     | 11.73  | 0    | 9.69   |   |
| 9545 | Usp38        | -1.21 | 169   | 7.48   | 93   | 6.18   |   |
| 9546 | Paip1        | -1.21 | 326   | 26.53  | 194  | 21.9   |   |
| 9547 | Abhd2        | -1.21 | 201   | 19.95  | 107  | 16.47  |   |
| 9548 | Samd9l       | -1.21 | 113   | 4.35   | 68   | 3.59   |   |
| 9549 | Rps16        | -1.21 | 893   | 316.1  | 505  | 260.83 |   |
| 9550 | Anxa6        | -1.21 | 945   | 78.4   | 542  | 64.69  |   |
| 9551 | Paxip1       | -1.21 | 210   | 10.89  | 128  | 8.99   |   |
| 9552 | Adsl         | -1.21 | 242   | 19.79  | 156  | 16.32  |   |
| 9553 | Antxr1       | -1.21 | 1845  | 103.98 | 1025 | 85.78  |   |

Supplemental Table 2  
Vehicle versus FSH, 24 hours

|      | A              | B     | C    | D      | E   | F      | G |
|------|----------------|-------|------|--------|-----|--------|---|
| 9554 | Alg3           | -1.21 | 78   | 12.98  | 47  | 10.7   |   |
| 9555 | Tpgs1          | -1.21 | 46   | 5.97   | 28  | 4.93   |   |
| 9556 | Trmt10a        | -1.21 | 101  | 4.72   | 55  | 3.9    |   |
| 9557 | Rpf1           | -1.21 | 95   | 13.22  | 66  | 10.9   |   |
| 9558 | Vamp8          | -1.21 | 44   | 30.73  | 23  | 25.34  |   |
| 9559 | Atp11b         | -1.21 | 172  | 10.39  | 104 | 8.57   |   |
| 9560 | Nfx1           | -1.21 | 575  | 20.54  | 299 | 16.94  |   |
| 9561 | RGD1306058     | -1.21 | 135  | 27.77  | 84  | 22.9   |   |
| 9562 | Pragmin        | -1.21 | 81   | 3.51   | 44  | 2.89   |   |
| 9563 | AABR07054370.1 | -1.21 | 113  | 50.13  | 84  | 41.32  |   |
| 9564 | Edf1           | -1.21 | 249  | 84.03  | 143 | 69.24  |   |
| 9565 | Ikkip          | -1.21 | 168  | 10.43  | 122 | 8.59   |   |
| 9566 | Erbp2          | -1.21 | 84   | 6.67   | 45  | 5.5    |   |
| 9567 | Rerg           | -1.21 | 212  | 14.52  | 133 | 11.96  |   |
| 9568 | Pla2g7         | -1.21 | 748  | 84.76  | 382 | 69.82  |   |
| 9569 | Synj1          | -1.21 | 302  | 8.91   | 199 | 7.34   |   |
| 9570 | Copg1          | -1.21 | 1068 | 48.29  | 642 | 39.77  |   |
| 9571 | Aspn_1         | -1.21 | 7    | 4.9    | 5   | 4.04   |   |
| 9572 | Lactb          | -1.21 | 79   | 3.59   | 37  | 2.96   |   |
| 9573 | Paxbp1         | -1.21 | 291  | 13.56  | 214 | 11.16  |   |
| 9574 | Ppat           | -1.21 | 193  | 9.26   | 110 | 7.63   |   |
| 9575 | Sart1          | -1.21 | 245  | 22.14  | 138 | 18.23  |   |
| 9576 | Nedd8          | -1.21 | 273  | 73.67  | 160 | 60.65  |   |
| 9577 | Ncam1          | -1.22 | 112  | 4.68   | 58  | 3.85   |   |
| 9578 | Pgam5          | -1.22 | 204  | 20.76  | 105 | 17.09  |   |
| 9579 | Gga1           | -1.22 | 232  | 19.92  | 138 | 16.39  |   |
| 9580 | Uba52          | -1.22 | 942  | 461.25 | 523 | 379.31 |   |
| 9581 | Rnf111l_1      | -1.22 | 80   | 21.49  | 41  | 17.66  |   |
| 9582 | Med10          | -1.22 | 81   | 18.19  | 57  | 14.94  |   |
| 9583 | Tbc1d25        | -1.22 | 244  | 6.89   | 158 | 5.66   |   |
| 9584 | Ube2e2         | -1.22 | 34   | 7.88   | 18  | 6.47   |   |
| 9585 | Gtf3a          | -1.22 | 89   | 12.92  | 63  | 10.61  |   |
| 9586 | LOC100912585   | -1.22 | 0    | 1.19   | 0   | 0.98   |   |
| 9587 | Mrpl41         | -1.22 | 37   | 16.26  | 21  | 13.35  |   |
| 9588 | Rsbp1          | -1.22 | 96   | 2.55   | 64  | 2.1    |   |
| 9589 | Zfp830         | -1.22 | 46   | 7.81   | 26  | 6.42   |   |
| 9590 | Cobll1         | -1.22 | 202  | 7.46   | 127 | 6.12   |   |
| 9591 | Dohh           | -1.22 | 153  | 20.45  | 85  | 16.77  |   |
| 9592 | Cr1l           | -1.22 | 459  | 44.92  | 261 | 36.84  |   |
| 9593 | Clip2          | -1.22 | 246  | 8.86   | 122 | 7.27   |   |
| 9594 | Cotl1          | -1.22 | 44   | 6.05   | 28  | 4.96   |   |
| 9595 | Emc6           | -1.22 | 77   | 15.35  | 44  | 12.58  |   |
| 9596 | Hyal3          | -1.22 | 46   | 6.94   | 24  | 5.69   |   |
| 9597 | Ddx20          | -1.22 | 124  | 10.41  | 75  | 8.53   |   |
| 9598 | Mon2           | -1.22 | 637  | 20.32  | 366 | 16.65  |   |
| 9599 | Ttl            | -1.22 | 124  | 11.69  | 78  | 9.58   |   |
| 9600 | Dmtf1          | -1.22 | 277  | 14.39  | 186 | 11.79  |   |
| 9601 | Prps1          | -1.22 | 115  | 13.84  | 64  | 11.33  |   |
| 9602 | Wdr44          | -1.22 | 77   | 2.97   | 43  | 2.43   |   |
| 9603 | Commd1         | -1.22 | 176  | 14.9   | 126 | 12.2   |   |
| 9604 | LOC498435      | -1.22 | 81   | 10.39  | 44  | 8.5    |   |
| 9605 | Kmt2a          | -1.22 | 561  | 11.43  | 313 | 9.36   |   |
| 9606 | RGD1307929     | -1.22 | 870  | 30.19  | 506 | 24.72  |   |
| 9607 | Eml4           | -1.22 | 221  | 9.39   | 139 | 7.68   |   |

Supplemental Table 2  
Vehicle versus FSH, 24 hours

|      | A              | B     | C    | D      | E    | F      | G |
|------|----------------|-------|------|--------|------|--------|---|
| 9608 | Tp53inp2       | -1.22 | 701  | 41.13  | 392  | 33.65  |   |
| 9609 | Ugdh           | -1.22 | 283  | 25.57  | 159  | 20.92  |   |
| 9610 | Tom1           | -1.22 | 209  | 18.38  | 112  | 15.03  |   |
| 9611 | Hcfc1          | -1.22 | 1501 | 39.91  | 852  | 32.63  |   |
| 9612 | Mrpl32         | -1.22 | 67   | 20.76  | 37   | 16.97  |   |
| 9613 | Orai1          | -1.22 | 94   | 14.21  | 57   | 11.62  |   |
| 9614 | Spdl1          | -1.22 | 25   | 1.74   | 15   | 1.42   |   |
| 9615 | AABR07059891.1 | -1.22 | 22   | 13.56  | 16   | 11.08  |   |
| 9616 | Auh            | -1.22 | 63   | 6.11   | 52   | 5      |   |
| 9617 | LOC100360835   | -1.22 | 2    | 6.51   | 5    | 5.32   |   |
| 9618 | Osbpl10        | -1.22 | 46   | 1.47   | 21   | 1.2    |   |
| 9619 | Ppp1r36        | -1.22 | 21   | 2.68   | 13   | 2.19   |   |
| 9620 | Rab39a         | -1.22 | 26   | 0.86   | 14   | 0.7    |   |
| 9621 | Tlk1_2         | -1.22 | 1    | 0.98   | 0    | 0.8    |   |
| 9622 | Usp29          | -1.22 | 20   | 0.63   | 12   | 0.52   |   |
| 9623 | Phlpp2         | -1.22 | 248  | 9.82   | 168  | 8.02   |   |
| 9624 | Aktip          | -1.22 | 131  | 17.69  | 72   | 14.45  |   |
| 9625 | Smim3          | -1.22 | 140  | 17.72  | 74   | 14.47  |   |
| 9626 | Yrdc           | -1.22 | 141  | 17.95  | 74   | 14.66  |   |
| 9627 | Hibadh         | -1.23 | 234  | 23.08  | 154  | 18.84  |   |
| 9628 | Dis3           | -1.23 | 110  | 6.04   | 69   | 4.93   |   |
| 9629 | Gpsm1          | -1.23 | 263  | 13.82  | 157  | 11.27  |   |
| 9630 | Ube2e1         | -1.23 | 142  | 32.09  | 85   | 26.17  |   |
| 9631 | Tmem57         | -1.23 | 210  | 13.14  | 120  | 10.71  |   |
| 9632 | Zfp704         | -1.23 | 101  | 6.03   | 75   | 4.91   |   |
| 9633 | Cct5           | -1.23 | 1070 | 147.73 | 600  | 120.41 |   |
| 9634 | Jtb            | -1.23 | 60   | 18.7   | 31   | 15.23  |   |
| 9635 | Suv39h111      | -1.23 | 86   | 4.93   | 46   | 4.01   |   |
| 9636 | Mynn           | -1.23 | 139  | 11.38  | 77   | 9.27   |   |
| 9637 | Smc5           | -1.23 | 261  | 7.86   | 153  | 6.4    |   |
| 9638 | Sec22b         | -1.23 | 228  | 38.17  | 143  | 31.07  |   |
| 9639 | BC068281       | -1.23 | 32   | 2.84   | 17   | 2.31   |   |
| 9640 | Fastkd1        | -1.23 | 65   | 3.5    | 36   | 2.85   |   |
| 9641 | Trit1          | -1.23 | 191  | 8.84   | 142  | 7.2    |   |
| 9642 | Trmt6          | -1.23 | 61   | 4.27   | 33   | 3.48   |   |
| 9643 | Ndrp1          | -1.23 | 57   | 4.28   | 29   | 3.49   |   |
| 9644 | Pdhx           | -1.23 | 62   | 4.56   | 40   | 3.71   |   |
| 9645 | Peg12          | -1.23 | 49   | 4.78   | 28   | 3.89   |   |
| 9646 | Rabep1         | -1.23 | 285  | 12.58  | 182  | 10.23  |   |
| 9647 | Rnd2           | -1.23 | 52   | 9.25   | 29   | 7.53   |   |
| 9648 | Rpl3           | -1.23 | 1980 | 351.69 | 1094 | 286.13 |   |
| 9649 | Atp2b1         | -1.23 | 857  | 40.14  | 474  | 32.64  |   |
| 9650 | Tax1bp1        | -1.23 | 774  | 52.89  | 497  | 43     |   |
| 9651 | Dync1i2        | -1.23 | 638  | 47.52  | 349  | 38.63  |   |
| 9652 | Gabpa          | -1.23 | 167  | 7.84   | 91   | 6.37   |   |
| 9653 | Lamc1          | -1.23 | 1268 | 38.18  | 709  | 31.01  |   |
| 9654 | Bri3bp         | -1.23 | 42   | 7.54   | 24   | 6.12   |   |
| 9655 | Cep63          | -1.23 | 114  | 6.11   | 78   | 4.97   |   |
| 9656 | Gabre          | -1.23 | 46   | 1.89   | 29   | 1.53   |   |
| 9657 | Gpatch2        | -1.23 | 125  | 4.97   | 64   | 4.03   |   |
| 9658 | Mgst3          | -1.23 | 37   | 14.12  | 20   | 11.47  |   |
| 9659 | Plod3          | -1.23 | 645  | 58.08  | 360  | 47.13  |   |
| 9660 | Lsm3           | -1.23 | 79   | 27.06  | 48   | 21.96  |   |
| 9661 | Rps7           | -1.23 | 166  | 426.35 | 104  | 345.98 |   |

Supplemental Table 2  
Vehicle versus FSH, 24 hours

|      | A            | B     | C   | D     | E   | F     | G |
|------|--------------|-------|-----|-------|-----|-------|---|
| 9662 | Ilf2         | -1.23 | 215 | 19.56 | 126 | 15.87 |   |
| 9663 | mrpl11       | -1.23 | 49  | 13    | 29  | 10.55 |   |
| 9664 | Polr2j       | -1.23 | 92  | 29.43 | 53  | 23.87 |   |
| 9665 | Fam207a      | -1.23 | 75  | 6.16  | 46  | 5     |   |
| 9666 | Pdcd10       | -1.23 | 214 | 27.69 | 123 | 22.45 |   |
| 9667 | Map3k3       | -1.23 | 353 | 15.43 | 216 | 12.51 |   |
| 9668 | F2r          | -1.23 | 450 | 32.11 | 251 | 26.03 |   |
| 9669 | Krit1        | -1.23 | 199 | 8.51  | 106 | 6.9   |   |
| 9670 | Tmcc2        | -1.23 | 76  | 3.52  | 45  | 2.85  |   |
| 9671 | Dyrk1a       | -1.23 | 271 | 19.05 | 170 | 15.44 |   |
| 9672 | Tra2b        | -1.23 | 578 | 78.87 | 370 | 63.87 |   |
| 9673 | Hprt1_2      | -1.24 | 82  | 42.78 | 43  | 34.64 |   |
| 9674 | Atp5f1_2     | -1.24 | 0   | 18    | 0   | 14.57 |   |
| 9675 | Ccnc         | -1.24 | 88  | 5.86  | 61  | 4.74  |   |
| 9676 | Guk1         | -1.24 | 177 | 41.4  | 96  | 33.5  |   |
| 9677 | Eef1e1       | -1.24 | 95  | 9.05  | 51  | 7.32  |   |
| 9678 | Nelfe        | -1.24 | 93  | 13.64 | 50  | 11.03 |   |
| 9679 | Mettl14      | -1.24 | 116 | 9.04  | 70  | 7.31  |   |
| 9680 | Plekho1      | -1.24 | 120 | 16.89 | 68  | 13.66 |   |
| 9681 | Pja2         | -1.24 | 527 | 27.76 | 299 | 22.45 |   |
| 9682 | Hmgn1        | -1.24 | 216 | 80.8  | 145 | 65.3  |   |
| 9683 | Arl8a        | -1.24 | 262 | 29.92 | 136 | 24.18 |   |
| 9684 | Mgat2        | -1.24 | 212 | 21.45 | 117 | 17.33 |   |
| 9685 | Taf2         | -1.24 | 260 | 10.58 | 139 | 8.55  |   |
| 9686 | Nap111       | -1.24 | 362 | 51.96 | 205 | 41.97 |   |
| 9687 | St13         | -1.24 | 119 | 68.51 | 104 | 55.33 |   |
| 9688 | Mllt4        | -1.24 | 653 | 24.78 | 390 | 20.01 |   |
| 9689 | Cadm4        | -1.24 | 9   | 1.56  | 5   | 1.26  |   |
| 9690 | Ndufaf2      | -1.24 | 42  | 2.11  | 21  | 1.7   |   |
| 9691 | Apobec3b     | -1.24 | 20  | 2.29  | 12  | 1.85  |   |
| 9692 | Aspn_2       | -1.24 | 7   | 3.27  | 6   | 2.64  |   |
| 9693 | Cdh13        | -1.24 | 102 | 1.67  | 79  | 1.34  |   |
| 9694 | Ctsk         | -1.24 | 20  | 3.17  | 17  | 2.56  |   |
| 9695 | Ddx11        | -1.24 | 18  | 2.14  | 10  | 1.73  |   |
| 9696 | Fam98b       | -1.24 | 37  | 8.61  | 24  | 6.95  |   |
| 9697 | Gm4944       | -1.24 | 20  | 1.34  | 15  | 1.09  |   |
| 9698 | Irx5         | -1.24 | 39  | 3.74  | 21  | 3.02  |   |
| 9699 | LOC100911519 | -1.24 | 0   | 0.81  | 0   | 0.66  |   |
| 9700 | Mcm4         | -1.24 | 208 | 18.8  | 120 | 15.18 |   |
| 9701 | Mcu          | -1.24 | 126 | 5.76  | 62  | 4.65  |   |
| 9702 | Mrpl38       | -1.24 | 109 | 18.9  | 59  | 15.26 |   |
| 9703 | Napepld      | -1.24 | 23  | 1.44  | 21  | 1.16  |   |
| 9704 | Nars2        | -1.24 | 62  | 3.94  | 45  | 3.18  |   |
| 9705 | Neurl2       | -1.24 | 10  | 1.54  | 7   | 1.24  |   |
| 9706 | Pbdc1        | -1.24 | 106 | 15.14 | 56  | 12.22 |   |
| 9707 | Pcdhb4       | -1.24 | 7   | 0.88  | 5   | 0.71  |   |
| 9708 | Polr2k       | -1.24 | 44  | 17.35 | 19  | 14.01 |   |
| 9709 | Pou6f1       | -1.24 | 62  | 6.03  | 30  | 4.87  |   |
| 9710 | Qtrt1        | -1.24 | 22  | 2.34  | 13  | 1.89  |   |
| 9711 | Rdh13        | -1.24 | 23  | 1.42  | 15  | 1.15  |   |
| 9712 | RGD1561252   | -1.24 | 8   | 12.27 | 4   | 9.9   |   |
| 9713 | Rhod         | -1.24 | 34  | 3.02  | 14  | 2.44  |   |
| 9714 | Rmdn3        | -1.24 | 18  | 4.08  | 10  | 3.29  |   |
| 9715 | Slc25a2      | -1.24 | 9   | 1.87  | 5   | 1.51  |   |

Supplemental Table 2  
Vehicle versus FSH, 24 hours

|      | A            | B     | C    | D      | E   | F      | G |
|------|--------------|-------|------|--------|-----|--------|---|
| 9716 | Snrpd1       | -1.24 | 85   | 24.26  | 52  | 19.58  |   |
| 9717 | Spred1       | -1.24 | 71   | 6.86   | 46  | 5.54   |   |
| 9718 | Stil         | -1.24 | 62   | 2.81   | 38  | 2.27   |   |
| 9719 | Tcaim        | -1.24 | 44   | 2.51   | 38  | 2.02   |   |
| 9720 | Tcf19        | -1.24 | 18   | 5.35   | 11  | 4.32   |   |
| 9721 | Tcp1111      | -1.24 | 93   | 8.4    | 64  | 6.78   |   |
| 9722 | Ube2j1       | -1.24 | 222  | 34.21  | 123 | 27.62  |   |
| 9723 | Vps37d       | -1.24 | 15   | 1.43   | 10  | 1.16   |   |
| 9724 | Zbtb2        | -1.24 | 73   | 5      | 35  | 4.04   |   |
| 9725 | LOC100910867 | -1.24 | 22   | 0.71   | 33  | 0.58   |   |
| 9726 | Uba2-ps1     | -1.24 | 86   | 17.18  | 50  | 13.87  |   |
| 9727 | Rgl1         | -1.24 | 430  | 15.04  | 226 | 12.14  |   |
| 9728 | Faf1         | -1.24 | 248  | 20.97  | 165 | 16.9   |   |
| 9729 | Rnf146       | -1.24 | 123  | 14.65  | 65  | 11.8   |   |
| 9730 | Odf2         | -1.24 | 380  | 16.57  | 235 | 13.35  |   |
| 9731 | Nmd3         | -1.24 | 108  | 11.17  | 65  | 8.99   |   |
| 9732 | Iqgap3       | -1.24 | 87   | 3.57   | 52  | 2.87   |   |
| 9733 | Ezh2         | -1.24 | 216  | 13.2   | 126 | 10.63  |   |
| 9734 | Pold3        | -1.24 | 91   | 4.29   | 52  | 3.45   |   |
| 9735 | Hectd3       | -1.24 | 73   | 6.26   | 40  | 5.04   |   |
| 9736 | Mapk8        | -1.24 | 161  | 9.79   | 110 | 7.88   |   |
| 9737 | Magt1        | -1.24 | 496  | 24.43  | 295 | 19.66  |   |
| 9738 | Lrch1        | -1.24 | 255  | 9.58   | 136 | 7.71   |   |
| 9739 | Csnk1a1      | -1.24 | 1454 | 125.07 | 769 | 100.62 |   |
| 9740 | Senp5        | -1.24 | 0    | 6.19   | 0   | 4.98   |   |
| 9741 | Tmcc1        | -1.24 | 223  | 13.93  | 152 | 11.2   |   |
| 9742 | Cnbp         | -1.24 | 754  | 110.77 | 418 | 89.08  |   |
| 9743 | Inpp4a       | -1.24 | 193  | 7.54   | 108 | 6.06   |   |
| 9744 | Ptar1        | -1.24 | 94   | 7.34   | 56  | 5.9    |   |
| 9745 | Mrpl12       | -1.24 | 148  | 22.48  | 86  | 18.07  |   |
| 9746 | Vps33b       | -1.24 | 61   | 4.76   | 38  | 3.83   |   |
| 9747 | Slc30a5      | -1.24 | 316  | 20.11  | 182 | 16.17  |   |
| 9748 | Acp1         | -1.24 | 62   | 13.72  | 49  | 11.02  |   |
| 9749 | Zbtb41       | -1.24 | 87   | 6.84   | 50  | 5.49   |   |
| 9750 | Acer3        | -1.24 | 108  | 5.06   | 70  | 4.06   |   |
| 9751 | Nckap5l      | -1.24 | 174  | 8.41   | 95  | 6.75   |   |
| 9752 | Psmc1        | -1.24 | 494  | 74.56  | 280 | 59.9   |   |
| 9753 | Ccdc149      | -1.25 | 82   | 4.99   | 48  | 4.01   |   |
| 9754 | Srgap1       | -1.25 | 114  | 2.91   | 92  | 2.33   |   |
| 9755 | Tab3         | -1.25 | 43   | 4.41   | 26  | 3.54   |   |
| 9756 | Rpa2         | -1.25 | 120  | 12.31  | 69  | 9.88   |   |
| 9757 | Tril         | -1.25 | 725  | 37.34  | 398 | 29.97  |   |
| 9758 | Yif1b_1      | -1.25 | 4    | 23.25  | 1   | 18.65  |   |
| 9759 | Stard4       | -1.25 | 103  | 8.94   | 58  | 7.17   |   |
| 9760 | Wdfy1        | -1.25 | 363  | 15.87  | 197 | 12.73  |   |
| 9761 | Ankrd13c     | -1.25 | 357  | 23.07  | 197 | 18.5   |   |
| 9762 | Cwc22        | -1.25 | 113  | 11.01  | 75  | 8.83   |   |
| 9763 | Fam199x      | -1.25 | 32   | 6.22   | 18  | 4.99   |   |
| 9764 | RGD1304595   | -1.25 | 38   | 1.82   | 21  | 1.46   |   |
| 9765 | Arhgap35     | -1.25 | 862  | 22.79  | 483 | 18.27  |   |
| 9766 | Sh2d4a       | -1.25 | 726  | 55.62  | 406 | 44.58  |   |
| 9767 | Ahr          | -1.25 | 175  | 7.56   | 93  | 6.05   |   |
| 9768 | Nup153       | -1.25 | 467  | 17.26  | 270 | 13.83  |   |
| 9769 | Cnbd2        | -1.25 | 536  | 3.9    | 503 | 3.12   |   |

Supplemental Table 2  
Vehicle versus FSH, 24 hours

|      | A            | B     | C    | D      | E   | F     | G |
|------|--------------|-------|------|--------|-----|-------|---|
| 9770 | Bicd1        | -1.25 | 171  | 2.95   | 119 | 2.36  |   |
| 9771 | Fam118b      | -1.25 | 105  | 7.42   | 62  | 5.94  |   |
| 9772 | Vps29        | -1.25 | 177  | 25.42  | 111 | 20.35 |   |
| 9773 | Gmps         | -1.25 | 218  | 20.44  | 133 | 16.36 |   |
| 9774 | Atg3         | -1.25 | 109  | 12.34  | 59  | 9.88  |   |
| 9775 | Socs5        | -1.25 | 170  | 9.3    | 103 | 7.44  |   |
| 9776 | Mesdc1       | -1.25 | 307  | 37.89  | 169 | 30.31 |   |
| 9777 | Atp5g1       | -1.25 | 125  | 66.18  | 78  | 52.92 |   |
| 9778 | Fkbp9        | -1.25 | 856  | 68.43  | 472 | 54.72 |   |
| 9779 | Lcorl        | -1.25 | 156  | 5.02   | 134 | 4.01  |   |
| 9780 | AC115158.1   | -1.25 | 38   | 7.95   | 21  | 6.35  |   |
| 9781 | Btn2a2       | -1.25 | 25   | 1.62   | 12  | 1.29  |   |
| 9782 | Cdca8        | -1.25 | 73   | 9.85   | 45  | 7.88  |   |
| 9783 | Dclk2        | -1.25 | 55   | 1.19   | 29  | 0.95  |   |
| 9784 | Epha4        | -1.25 | 23   | 0.79   | 17  | 0.63  |   |
| 9785 | Fgfr1op      | -1.25 | 103  | 4.67   | 61  | 3.73  |   |
| 9786 | Psmc6        | -1.25 | 313  | 27.23  | 171 | 21.76 |   |
| 9787 | Wwp1         | -1.25 | 87   | 6.53   | 57  | 5.22  |   |
| 9788 | Dysf         | -1.25 | 33   | 0.73   | 19  | 0.59  |   |
| 9789 | Add1         | -1.25 | 1378 | 74.34  | 751 | 59.39 |   |
| 9790 | Ppp3cb       | -1.25 | 276  | 17.56  | 158 | 14.03 |   |
| 9791 | LOC100362027 | -1.25 | 88   | 141.61 | 34  | 113.1 |   |
| 9792 | Mfn1         | -1.25 | 477  | 22.17  | 256 | 17.7  |   |
| 9793 | Col3a1       | -1.25 | 858  | 44.92  | 466 | 35.86 |   |
| 9794 | Alpk1        | -1.25 | 127  | 2.7    | 65  | 2.15  |   |
| 9795 | Rab6a        | -1.25 | 606  | 38.48  | 338 | 30.72 |   |
| 9796 | Txnl4a       | -1.25 | 73   | 24.47  | 39  | 19.53 |   |
| 9797 | LOC361990    | -1.25 | 334  | 26.55  | 245 | 21.19 |   |
| 9798 | Cdk12        | -1.25 | 310  | 10.42  | 204 | 8.32  |   |
| 9799 | Rbm18        | -1.25 | 204  | 17.44  | 112 | 13.91 |   |
| 9800 | Kpna2        | -1.25 | 94   | 35.1   | 47  | 28.01 |   |
| 9801 | Rcor3        | -1.25 | 114  | 6.91   | 75  | 5.51  |   |
| 9802 | Zbtb22       | -1.25 | 103  | 9.89   | 56  | 7.89  |   |
| 9803 | Aldh3a2      | -1.25 | 276  | 18.7   | 153 | 14.92 |   |
| 9804 | RGD1304704   | -1.25 | 338  | 62.98  | 197 | 50.23 |   |
| 9805 | Plk1         | -1.25 | 93   | 9.13   | 49  | 7.28  |   |
| 9806 | Dlst         | -1.25 | 491  | 39.54  | 273 | 31.53 |   |
| 9807 | Chchd6       | -1.25 | 54   | 7.17   | 29  | 5.71  |   |
| 9808 | Fzd5         | -1.25 | 31   | 3.59   | 16  | 2.86  |   |
| 9809 | Pus7         | -1.25 | 94   | 6.29   | 49  | 5.01  |   |
| 9810 | Golph3       | -1.26 | 310  | 26.87  | 159 | 21.4  |   |
| 9811 | Csrp2bp      | -1.26 | 125  | 6.86   | 84  | 5.46  |   |
| 9812 | Sbf2         | -1.26 | 691  | 17.04  | 387 | 13.57 |   |
| 9813 | Esd          | -1.26 | 174  | 26.69  | 108 | 21.25 |   |
| 9814 | Foxk1        | -1.26 | 62   | 3.26   | 41  | 2.6   |   |
| 9815 | Tmem123      | -1.26 | 819  | 57.28  | 397 | 45.61 |   |
| 9816 | Cebpz        | -1.26 | 245  | 13.07  | 137 | 10.4  |   |
| 9817 | Dnmt3a       | -1.26 | 232  | 9.76   | 126 | 7.77  |   |
| 9818 | Rlim         | -1.26 | 26   | 18.16  | 14  | 14.44 |   |
| 9819 | Ube2v2       | -1.26 | 112  | 7.23   | 65  | 5.75  |   |
| 9820 | LOC100910833 | -1.26 | 48   | 20.59  | 29  | 16.37 |   |
| 9821 | Klf9         | -1.26 | 144  | 10.53  | 77  | 8.37  |   |
| 9822 | Elf4         | -1.26 | 111  | 10.79  | 62  | 8.58  |   |
| 9823 | Cst3         | -1.26 | 869  | 320.27 | 467 | 254.6 |   |

Supplemental Table 2  
Vehicle versus FSH, 24 hours

|      | A              | B     | C    | D      | E   | F      | G |
|------|----------------|-------|------|--------|-----|--------|---|
| 9824 | Pnn            | -1.26 | 312  | 26.32  | 169 | 20.92  |   |
| 9825 | Brd9           | -1.26 | 233  | 12.91  | 143 | 10.26  |   |
| 9826 | Spata5         | -1.26 | 185  | 9.7    | 120 | 7.71   |   |
| 9827 | Cct7           | -1.26 | 674  | 77.18  | 355 | 61.32  |   |
| 9828 | Exoc1          | -1.26 | 224  | 10.95  | 137 | 8.7    |   |
| 9829 | Golga2         | -1.26 | 352  | 22.32  | 193 | 17.73  |   |
| 9830 | Ap1s1          | -1.26 | 304  | 49.87  | 167 | 39.6   |   |
| 9831 | Ero1l          | -1.26 | 125  | 11.53  | 80  | 9.16   |   |
| 9832 | Psen2          | -1.26 | 181  | 17.07  | 101 | 13.55  |   |
| 9833 | Plrg1          | -1.26 | 157  | 19.72  | 83  | 15.64  |   |
| 9834 | Akap9          | -1.26 | 729  | 13.07  | 421 | 10.37  |   |
| 9835 | Tec            | -1.26 | 23   | 0.86   | 12  | 0.68   |   |
| 9836 | Cbr1_1         | -1.26 | 0    | 1.41   | 0   | 1.12   |   |
| 9837 | Dennd1b        | -1.26 | 139  | 7.97   | 83  | 6.32   |   |
| 9838 | LOC100360056_1 | -1.26 | 2    | 44.93  | 1   | 35.61  |   |
| 9839 | LOC100361061   | -1.26 | 6    | 9.05   | 3   | 7.17   |   |
| 9840 | LOC100362038   | -1.26 | 714  | 24.51  | 398 | 19.43  |   |
| 9841 | LOC100362339   | -1.26 | 0    | 5.51   | 0   | 4.37   |   |
| 9842 | LOC103690015   | -1.26 | 1    | 6.01   | 0   | 4.76   |   |
| 9843 | Mbip           | -1.26 | 48   | 5.17   | 30  | 4.1    |   |
| 9844 | Mmp16          | -1.26 | 19   | 0.78   | 13  | 0.62   |   |
| 9845 | Mrps30         | -1.26 | 83   | 11.09  | 47  | 8.79   |   |
| 9846 | Zcchc3         | -1.26 | 44   | 9.11   | 24  | 7.22   |   |
| 9847 | Zmynd19        | -1.26 | 34   | 13.51  | 16  | 10.71  |   |
| 9848 | Enpep          | -1.26 | 18   | 0.72   | 12  | 0.57   |   |
| 9849 | Gtpbp6_1       | -1.26 | 0    | 1.78   | 0   | 1.41   |   |
| 9850 | Irf5           | -1.26 | 22   | 1.17   | 11  | 0.92   |   |
| 9851 | Kctd11         | -1.26 | 11   | 1.27   | 6   | 1      |   |
| 9852 | Pde12          | -1.26 | 85   | 4.69   | 45  | 3.72   |   |
| 9853 | Bri3           | -1.26 | 184  | 44.88  | 88  | 35.53  |   |
| 9854 | Rcc2           | -1.26 | 274  | 49.87  | 146 | 39.48  |   |
| 9855 | Ints10         | -1.26 | 221  | 11.51  | 120 | 9.11   |   |
| 9856 | Prtfdc1        | -1.26 | 588  | 23.95  | 292 | 18.96  |   |
| 9857 | Txn1           | -1.26 | 454  | 328.27 | 240 | 259.77 |   |
| 9858 | Cdk8           | -1.26 | 139  | 13.92  | 66  | 11.01  |   |
| 9859 | H2afx          | -1.26 | 166  | 31.66  | 91  | 25.05  |   |
| 9860 | Dnlz           | -1.26 | 79   | 12.5   | 43  | 9.89   |   |
| 9861 | Snx4           | -1.26 | 353  | 22.11  | 229 | 17.48  |   |
| 9862 | Stau1          | -1.26 | 416  | 28.46  | 237 | 22.5   |   |
| 9863 | Slc35f5        | -1.27 | 156  | 10.46  | 95  | 8.27   |   |
| 9864 | Trmt44         | -1.27 | 97   | 2      | 53  | 1.58   |   |
| 9865 | Ick            | -1.27 | 153  | 9.06   | 93  | 7.16   |   |
| 9866 | Tpx2           | -1.27 | 124  | 8.64   | 69  | 6.83   |   |
| 9867 | Zzef1          | -1.27 | 272  | 5.52   | 146 | 4.36   |   |
| 9868 | Csrnp2         | -1.27 | 110  | 8.17   | 78  | 6.45   |   |
| 9869 | Ntan1          | -1.27 | 131  | 17.96  | 60  | 14.19  |   |
| 9870 | Pfdn5          | -1.27 | 150  | 49.21  | 91  | 38.85  |   |
| 9871 | Sigmar1        | -1.27 | 259  | 38.15  | 139 | 30.1   |   |
| 9872 | LOC100359916   | -1.27 | 1013 | 206.78 | 618 | 163.13 |   |
| 9873 | Msantd2        | -1.27 | 327  | 10.48  | 173 | 8.26   |   |
| 9874 | Nemf           | -1.27 | 104  | 9.98   | 76  | 7.87   |   |
| 9875 | Eif3b          | -1.27 | 757  | 61.37  | 406 | 48.38  |   |
| 9876 | LOC102549842   | -1.27 | 130  | 4.59   | 96  | 3.62   |   |
| 9877 | Trappc5        | -1.27 | 75   | 12.23  | 35  | 9.64   |   |

Supplemental Table 2  
Vehicle versus FSH, 24 hours

|      | A          | B     | C    | D      | E   | F      | G |
|------|------------|-------|------|--------|-----|--------|---|
| 9878 | Enthd2     | -1.27 | 94   | 7.46   | 49  | 5.88   |   |
| 9879 | Ankrd12    | -1.27 | 236  | 4.84   | 146 | 3.81   |   |
| 9880 | AC133270.1 | -1.27 | 68   | 15.57  | 29  | 12.26  |   |
| 9881 | Clp1       | -1.27 | 48   | 6.63   | 27  | 5.22   |   |
| 9882 | Fancl      | -1.27 | 35   | 3.62   | 26  | 2.85   |   |
| 9883 | Lrrc28     | -1.27 | 49   | 2.04   | 30  | 1.61   |   |
| 9884 | Mnt        | -1.27 | 35   | 4.7    | 22  | 3.7    |   |
| 9885 | Pfkfb4_1   | -1.27 | 23   | 5.84   | 9   | 4.6    |   |
| 9886 | Prdm5      | -1.27 | 82   | 1.56   | 60  | 1.22   |   |
| 9887 | E2f8       | -1.27 | 29   | 2.27   | 14  | 1.79   |   |
| 9888 | Sh3bp1     | -1.27 | 28   | 2.33   | 14  | 1.83   |   |
| 9889 | RGD1308428 | -1.27 | 323  | 9.83   | 189 | 7.73   |   |
| 9890 | Col4a3bp   | -1.27 | 270  | 9.57   | 149 | 7.53   |   |
| 9891 | Ndufa13_2  | -1.27 | 278  | 178.43 | 168 | 140.38 |   |
| 9892 | MGC108823  | -1.27 | 58   | 20.79  | 27  | 16.35  |   |
| 9893 | Cers5      | -1.27 | 459  | 32.94  | 243 | 25.91  |   |
| 9894 | Cdk11b     | -1.27 | 337  | 25.22  | 179 | 19.83  |   |
| 9895 | Opa1       | -1.27 | 327  | 20.59  | 187 | 16.19  |   |
| 9896 | Phpt1      | -1.27 | 68   | 23.94  | 39  | 18.82  |   |
| 9897 | Snip1      | -1.27 | 0    | 6.16   | 0   | 4.85   |   |
| 9898 | Gnaq       | -1.27 | 191  | 18.11  | 125 | 14.24  |   |
| 9899 | Pcnp       | -1.27 | 151  | 40.43  | 83  | 31.77  |   |
| 9900 | Ticrr      | -1.27 | 49   | 1.42   | 30  | 1.11   |   |
| 9901 | Zdhhc21    | -1.27 | 87   | 5.12   | 52  | 4.02   |   |
| 9902 | Mis12      | -1.27 | 37   | 14.85  | 20  | 11.66  |   |
| 9903 | Tsen54     | -1.27 | 47   | 4.66   | 32  | 3.66   |   |
| 9904 | Rrp1       | -1.27 | 105  | 11.85  | 63  | 9.3    |   |
| 9905 | Tmem11     | -1.27 | 82   | 14.61  | 50  | 11.47  |   |
| 9906 | Ccar1      | -1.27 | 413  | 17.46  | 233 | 13.71  |   |
| 9907 | Nsa2       | -1.27 | 194  | 53.05  | 137 | 41.64  |   |
| 9908 | Anxa5      | -1.27 | 1270 | 185.38 | 696 | 145.48 |   |
| 9909 | Furin      | -1.27 | 1088 | 62.35  | 587 | 48.91  |   |
| 9910 | Cntrl      | -1.27 | 173  | 4.02   | 95  | 3.15   |   |
| 9911 | Nop16      | -1.27 | 116  | 23.42  | 65  | 18.37  |   |
| 9912 | Mob1a      | -1.28 | 471  | 27.77  | 258 | 21.78  |   |
| 9913 | Zfp644     | -1.28 | 985  | 25.5   | 509 | 20     |   |
| 9914 | Zdhhc13    | -1.28 | 88   | 7.85   | 49  | 6.16   |   |
| 9915 | Dcp1a      | -1.28 | 339  | 10.5   | 206 | 8.22   |   |
| 9916 | Hmgcr      | -1.28 | 1128 | 63.03  | 615 | 49.37  |   |
| 9917 | Cul1       | -1.28 | 491  | 31.46  | 273 | 24.63  |   |
| 9918 | Sec61a1    | -1.28 | 1101 | 88.92  | 596 | 69.62  |   |
| 9919 | Erh        | -1.28 | 259  | 78.67  | 139 | 61.59  |   |
| 9920 | Strap      | -1.28 | 250  | 43.43  | 136 | 33.99  |   |
| 9921 | Cic        | -1.28 | 553  | 23.77  | 287 | 18.61  |   |
| 9922 | Zfp106     | -1.28 | 638  | 23.31  | 338 | 18.24  |   |
| 9923 | Abhd11     | -1.28 | 26   | 5.66   | 17  | 4.43   |   |
| 9924 | Dctpp1     | -1.28 | 14   | 5.02   | 7   | 3.93   |   |
| 9925 | Gtpbp6_2   | -1.28 | 0    | 2.1    | 0   | 1.64   |   |
| 9926 | Nfatc2     | -1.28 | 22   | 0.88   | 16  | 0.68   |   |
| 9927 | Noc3l      | -1.28 | 126  | 7.72   | 56  | 6.04   |   |
| 9928 | Ranbp17    | -1.28 | 43   | 0.66   | 30  | 0.52   |   |
| 9929 | Rpl39_1    | -1.28 | 0    | 20.76  | 0   | 16.25  |   |
| 9930 | Shcbp1     | -1.28 | 29   | 3.26   | 17  | 2.55   |   |
| 9931 | Swt1       | -1.28 | 123  | 5.28   | 92  | 4.13   |   |



Supplemental Table 2  
Vehicle versus FSH, 24 hours

|      | A              | B     | C    | D      | E    | F      | G |
|------|----------------|-------|------|--------|------|--------|---|
| 9932 | Taok3          | -1.28 | 112  | 4.46   | 51   | 3.49   |   |
| 9933 | AABR07032135.1 | -1.28 | 17   | 6.44   | 12   | 5.04   |   |
| 9934 | AABR07059639.1 | -1.28 | 0    | 2.11   | 0    | 1.65   |   |
| 9935 | Cds1           | -1.28 | 17   | 1.64   | 13   | 1.29   |   |
| 9936 | Cldn1          | -1.28 | 14   | 0.98   | 9    | 0.77   |   |
| 9937 | Dph5           | -1.28 | 37   | 4.2    | 20   | 3.29   |   |
| 9938 | Mrpl2          | -1.28 | 38   | 9.19   | 26   | 7.19   |   |
| 9939 | Rbm20          | -1.28 | 22   | 0.48   | 13   | 0.38   |   |
| 9940 | Sf3b6          | -1.28 | 50   | 17.41  | 25   | 13.63  |   |
| 9941 | Atp5e          | -1.28 | 190  | 130.9  | 107  | 102.34 |   |
| 9942 | Tpp2           | -1.28 | 445  | 13.43  | 247  | 10.5   |   |
| 9943 | Upf2           | -1.28 | 155  | 7.77   | 114  | 6.07   |   |
| 9944 | Slc30a7        | -1.28 | 126  | 11.4   | 67   | 8.91   |   |
| 9945 | Usp10          | -1.28 | 440  | 27.46  | 233  | 21.45  |   |
| 9946 | Cnot6l         | -1.28 | 296  | 14.11  | 162  | 11.02  |   |
| 9947 | Mtx2           | -1.28 | 97   | 13.77  | 73   | 10.75  |   |
| 9948 | Krcc1          | -1.28 | 171  | 18.69  | 97   | 14.59  |   |
| 9949 | Tbc1d9         | -1.28 | 297  | 10.33  | 174  | 8.06   |   |
| 9950 | Usp47          | -1.28 | 938  | 32.77  | 549  | 25.58  |   |
| 9951 | Cops2          | -1.28 | 382  | 23.13  | 206  | 18.05  |   |
| 9952 | RGD1560341     | -1.28 | 181  | 39.18  | 106  | 30.57  |   |
| 9953 | Phc3           | -1.28 | 233  | 9.35   | 144  | 7.29   |   |
| 9954 | Itih5          | -1.28 | 49   | 7.26   | 25   | 5.66   |   |
| 9955 | Mfhas1         | -1.28 | 57   | 3.22   | 31   | 2.51   |   |
| 9956 | Zfp503         | -1.28 | 41   | 3.29   | 22   | 2.57   |   |
| 9957 | Becn1          | -1.28 | 315  | 17.5   | 177  | 13.64  |   |
| 9958 | Ube2q1         | -1.28 | 312  | 36.01  | 186  | 28.07  |   |
| 9959 | Eif3i          | -1.28 | 328  | 82.55  | 167  | 64.34  |   |
| 9960 | Ube2n          | -1.28 | 241  | 41.56  | 140  | 32.38  |   |
| 9961 | Bloc1s1        | -1.28 | 76   | 31.37  | 44   | 24.45  |   |
| 9962 | Slc12a7        | -1.28 | 639  | 24.42  | 340  | 19.03  |   |
| 9963 | Kdm5c          | -1.28 | 710  | 25.95  | 387  | 20.22  |   |
| 9964 | LOC684988      | -1.28 | 497  | 384.94 | 292  | 299.76 |   |
| 9965 | Lox            | -1.28 | 3172 | 157.21 | 1813 | 122.4  |   |
| 9966 | Utp15          | -1.28 | 121  | 10.62  | 62   | 8.27   |   |
| 9967 | Rps6kc1        | -1.29 | 199  | 6.23   | 121  | 4.85   |   |
| 9968 | Blmh           | -1.29 | 289  | 23.11  | 156  | 17.98  |   |
| 9969 | Arntl          | -1.29 | 110  | 5.95   | 53   | 4.63   |   |
| 9970 | Wbscr22        | -1.29 | 90   | 12.33  | 41   | 9.59   |   |
| 9971 | Atp10d         | -1.29 | 534  | 27.36  | 301  | 21.28  |   |
| 9972 | Ap4b1          | -1.29 | 99   | 7.34   | 53   | 5.7    |   |
| 9973 | Pop4           | -1.29 | 100  | 18.19  | 56   | 14.14  |   |
| 9974 | Tsr1           | -1.29 | 221  | 19.29  | 127  | 14.99  |   |
| 9975 | Cd59           | -1.29 | 370  | 60.61  | 203  | 47.09  |   |
| 9976 | Lcat           | -1.29 | 77   | 10.61  | 41   | 8.24   |   |
| 9977 | Nup43          | -1.29 | 66   | 7.84   | 40   | 6.09   |   |
| 9978 | Csnk1g3        | -1.29 | 152  | 13.5   | 70   | 10.48  |   |
| 9979 | Mettl9         | -1.29 | 258  | 35.25  | 146  | 27.35  |   |
| 9980 | Zfp91          | -1.29 | 385  | 18.05  | 218  | 14.01  |   |
| 9981 | Zfp84          | -1.29 | 317  | 4.31   | 251  | 3.34   |   |
| 9982 | Trim8          | -1.29 | 190  | 11.84  | 96   | 9.18   |   |
| 9983 | Brd7           | -1.29 | 330  | 27.82  | 181  | 21.57  |   |
| 9984 | Akr1c3         | -1.29 | 68   | 12.3   | 38   | 9.54   |   |
| 9985 | Taf13          | -1.29 | 41   | 5.49   | 21   | 4.25   |   |

Supplemental Table 2  
Vehicle versus FSH, 24 hours

|       | A            | B     | C    | D      | E   | F      | G |
|-------|--------------|-------|------|--------|-----|--------|---|
| 9986  | Dab2ip       | -1.29 | 358  | 11.36  | 183 | 8.8    |   |
| 9987  | Haus7        | -1.29 | 38   | 3.77   | 20  | 2.92   |   |
| 9988  | Hddc2        | -1.29 | 49   | 5.62   | 24  | 4.36   |   |
| 9989  | Pradc1       | -1.29 | 19   | 3.36   | 9   | 2.6    |   |
| 9990  | Rtn4r        | -1.29 | 20   | 2.18   | 13  | 1.69   |   |
| 9991  | Trim65       | -1.29 | 72   | 5      | 36  | 3.87   |   |
| 9992  | Lsm14a       | -1.29 | 414  | 29.87  | 249 | 23.14  |   |
| 9993  | Snrnp70      | -1.29 | 830  | 50.31  | 512 | 38.94  |   |
| 9994  | LOC100911766 | -1.29 | 19   | 12.79  | 11  | 9.9    |   |
| 9995  | Isy1         | -1.29 | 118  | 15.5   | 72  | 12     |   |
| 9996  | Dap3         | -1.29 | 225  | 17.59  | 127 | 13.61  |   |
| 9997  | Spag5        | -1.29 | 64   | 3.95   | 36  | 3.06   |   |
| 9998  | Tbk1         | -1.29 | 164  | 6.59   | 86  | 5.09   |   |
| 9999  | Mt-nd6       | -1.29 | 741  | 364.87 | 395 | 281.84 |   |
| 10000 | Hbs1l        | -1.29 | 319  | 20.53  | 174 | 15.86  |   |
| 10001 | Pitrm1       | -1.29 | 643  | 42.38  | 340 | 32.73  |   |
| 10002 | Cd63         | -1.29 | 746  | 162.7  | 392 | 125.64 |   |
| 10003 | Recql4       | -1.3  | 23   | 1.32   | 11  | 1.02   |   |
| 10004 | Cdc7         | -1.3  | 46   | 2.73   | 19  | 2.11   |   |
| 10005 | Eed          | -1.3  | 147  | 11.88  | 78  | 9.17   |   |
| 10006 | C1qbp        | -1.3  | 263  | 59.19  | 140 | 45.68  |   |
| 10007 | Smc6         | -1.3  | 284  | 13.03  | 165 | 10.06  |   |
| 10008 | Ralbp1       | -1.3  | 469  | 34.67  | 241 | 26.72  |   |
| 10009 | Mak16        | -1.3  | 69   | 9.64   | 40  | 7.43   |   |
| 10010 | Rangap1      | -1.3  | 379  | 28.13  | 193 | 21.68  |   |
| 10011 | Eftud1       | -1.3  | 145  | 7.8    | 90  | 6.01   |   |
| 10012 | Cyb5r4       | -1.3  | 176  | 14.98  | 96  | 11.53  |   |
| 10013 | Hipk3        | -1.3  | 627  | 33.29  | 336 | 25.62  |   |
| 10014 | LOC100910951 | -1.3  | 16   | 7.67   | 7   | 5.9    |   |
| 10015 | Ap4s1        | -1.3  | 57   | 2.48   | 33  | 1.91   |   |
| 10016 | Eapp         | -1.3  | 74   | 14.78  | 51  | 11.37  |   |
| 10017 | Hdac11       | -1.3  | 18   | 1.69   | 15  | 1.3    |   |
| 10018 | Loxl3        | -1.3  | 25   | 1.32   | 12  | 1.02   |   |
| 10019 | MGC94335     | -1.3  | 78   | 12.3   | 39  | 9.46   |   |
| 10020 | Pmm2         | -1.3  | 247  | 23.01  | 138 | 17.7   |   |
| 10021 | Sdad1        | -1.3  | 121  | 7.77   | 69  | 5.97   |   |
| 10022 | Tap2_1       | -1.3  | 1    | 3.49   | 0   | 2.69   |   |
| 10023 | Zfp259       | -1.3  | 147  | 10.24  | 75  | 7.88   |   |
| 10024 | RGD1564420   | -1.3  | 363  | 20.6   | 198 | 15.83  |   |
| 10025 | Ep300        | -1.3  | 194  | 14.95  | 122 | 11.49  |   |
| 10026 | Ppfibp1      | -1.3  | 1325 | 54.75  | 742 | 42.07  |   |
| 10027 | Rars         | -1.3  | 272  | 28.56  | 145 | 21.94  |   |
| 10028 | Nln          | -1.3  | 207  | 11.67  | 113 | 8.97   |   |
| 10029 | RGD1311946   | -1.3  | 160  | 18.4   | 87  | 14.14  |   |
| 10030 | Cflar        | -1.3  | 205  | 7.64   | 114 | 5.87   |   |
| 10031 | LOC100125364 | -1.3  | 119  | 12.08  | 69  | 9.27   |   |
| 10032 | Rrp8         | -1.3  | 56   | 4.87   | 30  | 3.74   |   |
| 10033 | Ufc1         | -1.3  | 134  | 25.47  | 74  | 19.55  |   |
| 10034 | Fbl          | -1.3  | 225  | 52.32  | 124 | 40.16  |   |
| 10035 | Stk25        | -1.3  | 423  | 48.51  | 231 | 37.24  |   |
| 10036 | Lrwd1        | -1.3  | 109  | 9.99   | 52  | 7.67   |   |
| 10037 | Hlcs         | -1.3  | 186  | 6.35   | 152 | 4.87   |   |
| 10038 | Dek          | -1.3  | 201  | 15.92  | 115 | 12.21  |   |
| 10039 | Arl3         | -1.3  | 163  | 16.71  | 100 | 12.81  |   |

Supplemental Table 2  
Vehicle versus FSH, 24 hours

|       | A        | B     | C    | D      | E    | F      | G |
|-------|----------|-------|------|--------|------|--------|---|
| 10040 | Fam32a   | -1.3  | 248  | 29.59  | 137  | 22.67  |   |
| 10041 | Mybbp1a  | -1.31 | 697  | 43.72  | 375  | 33.5   |   |
| 10042 | Pvrl3    | -1.31 | 274  | 16.81  | 202  | 12.88  |   |
| 10043 | Anapc7   | -1.31 | 207  | 16.73  | 119  | 12.82  |   |
| 10044 | Ndufv3   | -1.31 | 165  | 26.32  | 99   | 20.17  |   |
| 10045 | Smyd2    | -1.31 | 255  | 29.11  | 147  | 22.3   |   |
| 10046 | Cstf3    | -1.31 | 164  | 6.15   | 93   | 4.71   |   |
| 10047 | Glud1    | -1.31 | 799  | 61.36  | 411  | 46.98  |   |
| 10048 | Emg1     | -1.31 | 194  | 12.68  | 111  | 9.71   |   |
| 10049 | Ndufb11  | -1.31 | 188  | 54.59  | 98   | 41.79  |   |
| 10050 | Cdk17    | -1.31 | 138  | 6.31   | 85   | 4.83   |   |
| 10051 | Ccdc88a  | -1.31 | 196  | 6.87   | 109  | 5.26   |   |
| 10052 | Ubqln1   | -1.31 | 866  | 52.89  | 451  | 40.46  |   |
| 10053 | Cep19    | -1.31 | 62   | 9.19   | 36   | 7.03   |   |
| 10054 | Gkap1    | -1.31 | 197  | 13.11  | 141  | 10.02  |   |
| 10055 | Lrrc8e   | -1.31 | 64   | 4.74   | 33   | 3.62   |   |
| 10056 | Med21    | -1.31 | 51   | 11.92  | 33   | 9.12   |   |
| 10057 | ldh1     | -1.31 | 581  | 64.96  | 301  | 49.63  |   |
| 10058 | Atoh8    | -1.31 | 117  | 10.18  | 64   | 7.77   |   |
| 10059 | Clpb     | -1.31 | 117  | 10.28  | 72   | 7.86   |   |
| 10060 | Ago2     | -1.31 | 255  | 18.71  | 135  | 14.29  |   |
| 10061 | Mrpl28   | -1.31 | 84   | 25.11  | 43   | 19.18  |   |
| 10062 | Klc2     | -1.31 | 280  | 21.77  | 151  | 16.63  |   |
| 10063 | Sms      | -1.31 | 69   | 15.24  | 46   | 11.63  |   |
| 10064 | Etv3     | -1.31 | 168  | 6.64   | 83   | 5.07   |   |
| 10065 | Ttc28    | -1.31 | 739  | 13.65  | 383  | 10.41  |   |
| 10066 | Cog3     | -1.31 | 191  | 10.5   | 114  | 8.01   |   |
| 10067 | Cd200    | -1.31 | 430  | 44.59  | 242  | 34.02  |   |
| 10068 | Sh3bgrl3 | -1.31 | 122  | 39.6   | 65   | 30.21  |   |
| 10069 | Hdgf     | -1.31 | 869  | 108.69 | 451  | 82.92  |   |
| 10070 | Deptor   | -1.31 | 386  | 28.93  | 194  | 22.06  |   |
| 10071 | ltsn2    | -1.31 | 388  | 10.19  | 199  | 7.77   |   |
| 10072 | Slain2   | -1.31 | 498  | 17.94  | 274  | 13.68  |   |
| 10073 | Gapvd1   | -1.31 | 619  | 24.36  | 323  | 18.57  |   |
| 10074 | Cpne1    | -1.31 | 0    | 7.33   | 0    | 5.58   |   |
| 10075 | Med1     | -1.31 | 412  | 16.03  | 236  | 12.21  |   |
| 10076 | Anxa7    | -1.31 | 664  | 81.36  | 351  | 61.94  |   |
| 10077 | Cops5    | -1.31 | 209  | 27.78  | 114  | 21.14  |   |
| 10078 | Cript    | -1.31 | 64   | 10.98  | 33   | 8.36   |   |
| 10079 | Fam129b  | -1.31 | 92   | 5.69   | 50   | 4.33   |   |
| 10080 | Fam92a1  | -1.31 | 52   | 9.8    | 39   | 7.46   |   |
| 10081 | Haus4    | -1.31 | 24   | 3.38   | 11   | 2.57   |   |
| 10082 | Med11    | -1.31 | 22   | 5.78   | 11   | 4.4    |   |
| 10083 | Prpf39   | -1.31 | 318  | 13.22  | 161  | 10.06  |   |
| 10084 | Rab33b   | -1.31 | 107  | 7.8    | 58   | 5.94   |   |
| 10085 | Rnf40    | -1.31 | 64   | 6.12   | 36   | 4.66   |   |
| 10086 | Sertad3  | -1.31 | 25   | 3.98   | 15   | 3.03   |   |
| 10087 | Smc3     | -1.31 | 366  | 17.42  | 199  | 13.26  |   |
| 10088 | Cep290   | -1.31 | 48   | 1.15   | 35   | 0.88   |   |
| 10089 | Zc3h15   | -1.31 | 229  | 31.47  | 127  | 23.95  |   |
| 10090 | Drap1    | -1.31 | 161  | 26.41  | 85   | 20.09  |   |
| 10091 | Psmd12   | -1.31 | 342  | 40.64  | 184  | 30.91  |   |
| 10092 | Eif3g    | -1.32 | 337  | 72.77  | 177  | 55.33  |   |
| 10093 | Serpinh1 | -1.32 | 4148 | 482.62 | 2159 | 366.91 |   |

Supplemental Table 2  
Vehicle versus FSH, 24 hours

|       | A              | B     | C    | D      | E    | F      | G |
|-------|----------------|-------|------|--------|------|--------|---|
| 10094 | Rps3a          | -1.32 | 284  | 156.75 | 101  | 119.15 |   |
| 10095 | Zw10           | -1.32 | 119  | 10.29  | 66   | 7.82   |   |
| 10096 | Psma7          | -1.32 | 489  | 124.58 | 263  | 94.64  |   |
| 10097 | Hook1          | -1.32 | 51   | 2      | 33   | 1.52   |   |
| 10098 | Itga5          | -1.32 | 135  | 7.48   | 71   | 5.68   |   |
| 10099 | LOC100359600   | -1.32 | 13   | 5.55   | 6    | 4.21   |   |
| 10100 | Nsun5          | -1.32 | 49   | 6.97   | 26   | 5.3    |   |
| 10101 | Vps37a         | -1.32 | 135  | 12.79  | 79   | 9.71   |   |
| 10102 | Zdhhc20        | -1.32 | 206  | 16.71  | 120  | 12.69  |   |
| 10103 | Cct4           | -1.32 | 831  | 91.75  | 433  | 69.67  |   |
| 10104 | Nip7           | -1.32 | 71   | 14.17  | 40   | 10.76  |   |
| 10105 | Apaf1          | -1.32 | 283  | 10.25  | 142  | 7.78   |   |
| 10106 | Hivep2         | -1.32 | 43   | 1.22   | 26   | 0.92   |   |
| 10107 | Rassf7         | -1.32 | 24   | 4.06   | 12   | 3.07   |   |
| 10108 | Wdr76          | -1.32 | 37   | 3.07   | 24   | 2.32   |   |
| 10109 | Ankrd28        | -1.32 | 352  | 18.93  | 200  | 14.35  |   |
| 10110 | Dnajc19        | -1.32 | 56   | 2.43   | 45   | 1.84   |   |
| 10111 | Fam115c_2      | -1.32 | 4    | 1.94   | 0    | 1.47   |   |
| 10112 | Ngrn           | -1.32 | 77   | 8.6    | 45   | 6.52   |   |
| 10113 | Setd7          | -1.32 | 153  | 11.59  | 84   | 8.79   |   |
| 10114 | Utp14a         | -1.32 | 66   | 4.41   | 32   | 3.34   |   |
| 10115 | Plat           | -1.32 | 63   | 9.21   | 34   | 6.98   |   |
| 10116 | Prkar2a        | -1.32 | 332  | 26.72  | 185  | 20.24  |   |
| 10117 | Chd7           | -1.32 | 142  | 3      | 72   | 2.27   |   |
| 10118 | Nptn           | -1.32 | 429  | 37.8   | 215  | 28.62  |   |
| 10119 | Pdap1          | -1.32 | 282  | 43.54  | 150  | 32.96  |   |
| 10120 | Polr3k         | -1.32 | 50   | 12.39  | 27   | 9.38   |   |
| 10121 | Ppig           | -1.32 | 264  | 12.81  | 139  | 9.69   |   |
| 10122 | Cdk2           | -1.32 | 205  | 19.2   | 104  | 14.53  |   |
| 10123 | Tmod3          | -1.32 | 224  | 26.89  | 110  | 20.33  |   |
| 10124 | Trip11         | -1.32 | 383  | 9.64   | 198  | 7.29   |   |
| 10125 | Jup            | -1.32 | 1213 | 65.83  | 621  | 49.74  |   |
| 10126 | Eif2b2         | -1.32 | 106  | 10.31  | 59   | 7.79   |   |
| 10127 | AABR07048308.1 | -1.32 | 8    | 20.16  | 7    | 15.23  |   |
| 10128 | Alkbh3         | -1.32 | 153  | 14.83  | 84   | 11.21  |   |
| 10129 | Htra2          | -1.32 | 111  | 14.27  | 59   | 10.78  |   |
| 10130 | Lipt2          | -1.32 | 25   | 3.29   | 13   | 2.48   |   |
| 10131 | Sp100          | -1.32 | 40   | 6.13   | 20   | 4.63   |   |
| 10132 | Zfp182         | -1.32 | 29   | 2.82   | 14   | 2.13   |   |
| 10133 | Npepps         | -1.32 | 558  | 27.46  | 318  | 20.74  |   |
| 10134 | Plxdc2         | -1.32 | 2021 | 132.01 | 1127 | 99.68  |   |
| 10135 | H6pd           | -1.32 | 86   | 4.06   | 42   | 3.07   |   |
| 10136 | Llgl2          | -1.33 | 67   | 3.04   | 37   | 2.29   |   |
| 10137 | Ap5b1          | -1.33 | 52   | 3.62   | 26   | 2.73   |   |
| 10138 | Gpn2           | -1.33 | 60   | 10.27  | 32   | 7.75   |   |
| 10139 | Dos            | -1.33 | 106  | 7.45   | 52   | 5.62   |   |
| 10140 | Slmap          | -1.33 | 679  | 21.86  | 343  | 16.48  |   |
| 10141 | Phf3           | -1.33 | 426  | 12.58  | 225  | 9.49   |   |
| 10142 | Rngtt          | -1.33 | 192  | 6.39   | 115  | 4.82   |   |
| 10143 | Vps35          | -1.33 | 625  | 45.9   | 326  | 34.6   |   |
| 10144 | Ostc           | -1.33 | 333  | 56.65  | 155  | 42.7   |   |
| 10145 | AABR07026197.1 | -1.33 | 19   | 1.68   | 10   | 1.26   |   |
| 10146 | Armc8          | -1.33 | 195  | 6.05   | 132  | 4.56   |   |
| 10147 | Pcgf3          | -1.33 | 255  | 28.34  | 155  | 21.34  |   |

Supplemental Table 2  
Vehicle versus FSH, 24 hours

|       | A            | B     | C    | D      | E    | F      | G |
|-------|--------------|-------|------|--------|------|--------|---|
| 10148 | Rnf111       | -1.33 | 437  | 18.18  | 234  | 13.69  |   |
| 10149 | Bud31        | -1.33 | 190  | 42.78  | 102  | 32.21  |   |
| 10150 | Sugp2        | -1.33 | 114  | 4.82   | 67   | 3.63   |   |
| 10151 | Ddb1         | -1.33 | 3668 | 208.93 | 1875 | 157.27 |   |
| 10152 | Fmr1         | -1.33 | 270  | 12.92  | 151  | 9.72   |   |
| 10153 | Ctu2         | -1.33 | 64   | 7.22   | 32   | 5.43   |   |
| 10154 | Mrpl16       | -1.33 | 73   | 12.14  | 35   | 9.14   |   |
| 10155 | Saa4         | -1.33 | 87   | 2.02   | 47   | 1.52   |   |
| 10156 | Rai2         | -1.33 | 460  | 33.04  | 241  | 24.85  |   |
| 10157 | Ktn1         | -1.33 | 530  | 20.47  | 281  | 15.4   |   |
| 10158 | Tex2         | -1.33 | 271  | 7.53   | 135  | 5.66   |   |
| 10159 | Ccdc186      | -1.33 | 112  | 7.85   | 62   | 5.9    |   |
| 10160 | Cit          | -1.33 | 69   | 1.91   | 41   | 1.43   |   |
| 10161 | Immt         | -1.33 | 440  | 32.54  | 251  | 24.45  |   |
| 10162 | Iscu         | -1.33 | 96   | 23.46  | 56   | 17.63  |   |
| 10163 | Kcnk6_1      | -1.33 | 13   | 3.12   | 12   | 2.34   |   |
| 10164 | Parp12       | -1.33 | 131  | 10.22  | 71   | 7.68   |   |
| 10165 | Ltv1         | -1.33 | 111  | 11.48  | 53   | 8.63   |   |
| 10166 | Otud6b       | -1.33 | 102  | 9.29   | 65   | 6.99   |   |
| 10167 | Usp32        | -1.33 | 417  | 11.35  | 261  | 8.53   |   |
| 10168 | Fam168a      | -1.33 | 542  | 23.38  | 297  | 17.56  |   |
| 10169 | Eml2         | -1.33 | 259  | 18.98  | 150  | 14.25  |   |
| 10170 | LOC100364791 | -1.33 | 273  | 20.71  | 160  | 15.55  |   |
| 10171 | Ndufs7       | -1.33 | 145  | 30.48  | 80   | 22.88  |   |
| 10172 | Ahctf1       | -1.33 | 419  | 11.12  | 228  | 8.35   |   |
| 10173 | Maea         | -1.33 | 420  | 42.88  | 215  | 32.17  |   |
| 10174 | Arl6ip4      | -1.33 | 98   | 19.52  | 50   | 14.64  |   |
| 10175 | Rpl34        | -1.33 | 671  | 632.77 | 363  | 474.58 |   |
| 10176 | Atad2        | -1.33 | 154  | 7.62   | 75   | 5.71   |   |
| 10177 | Lrch2        | -1.33 | 82   | 6.88   | 44   | 5.15   |   |
| 10178 | Wdr55        | -1.33 | 395  | 29.65  | 214  | 22.21  |   |
| 10179 | Eps1511      | -1.33 | 538  | 20.08  | 320  | 15.04  |   |
| 10180 | Mapkap1      | -1.34 | 258  | 13.77  | 160  | 10.31  |   |
| 10181 | Psme4        | -1.34 | 1253 | 36.48  | 639  | 27.32  |   |
| 10182 | Otud7b       | -1.34 | 340  | 10.74  | 175  | 8.04   |   |
| 10183 | Akap17a      | -1.34 | 106  | 7.72   | 59   | 5.78   |   |
| 10184 | Med29        | -1.34 | 85   | 12.68  | 42   | 9.49   |   |
| 10185 | Tmed8        | -1.34 | 51   | 8.38   | 44   | 6.27   |   |
| 10186 | Orc6         | -1.34 | 40   | 5.44   | 23   | 4.07   |   |
| 10187 | Rwdd2b       | -1.34 | 40   | 3.83   | 20   | 2.87   |   |
| 10188 | Vac14        | -1.34 | 407  | 24.45  | 220  | 18.3   |   |
| 10189 | Gnai3        | -1.34 | 602  | 43.88  | 320  | 32.84  |   |
| 10190 | Mta3         | -1.34 | 473  | 35.09  | 312  | 26.26  |   |
| 10191 | Rpl29        | -1.34 | 469  | 281.99 | 258  | 210.92 |   |
| 10192 | LOC102553002 | -1.34 | 82   | 5.21   | 63   | 3.9    |   |
| 10193 | Magi1        | -1.34 | 109  | 3.53   | 85   | 2.64   |   |
| 10194 | Wbscr16      | -1.34 | 92   | 6.71   | 46   | 5.02   |   |
| 10195 | Setx         | -1.34 | 421  | 10.25  | 227  | 7.66   |   |
| 10196 | Gjc1         | -1.34 | 72   | 5.47   | 31   | 4.09   |   |
| 10197 | Lbhd1        | -1.34 | 35   | 13.54  | 17   | 10.12  |   |
| 10198 | Scai         | -1.34 | 97   | 4.16   | 66   | 3.11   |   |
| 10199 | Hmgxb3       | -1.34 | 175  | 10.24  | 99   | 7.65   |   |
| 10200 | Krt8         | -1.34 | 36   | 5.06   | 18   | 3.78   |   |
| 10201 | LOC500035    | -1.34 | 19   | 13.09  | 10   | 9.79   |   |

Supplemental Table 2  
Vehicle versus FSH, 24 hours

|       | A               | B     | C   | D      | E   | F      | G |
|-------|-----------------|-------|-----|--------|-----|--------|---|
| 10202 | Megf10          | -1.34 | 36  | 1.15   | 27  | 0.86   |   |
| 10203 | Cul2            | -1.34 | 234 | 11.21  | 139 | 8.38   |   |
| 10204 | Armcx3          | -1.34 | 321 | 20.98  | 164 | 15.67  |   |
| 10205 | Aff3            | -1.34 | 366 | 6.65   | 220 | 4.96   |   |
| 10206 | Pacsin2         | -1.34 | 284 | 12.99  | 146 | 9.69   |   |
| 10207 | Fam188a         | -1.34 | 114 | 7.94   | 79  | 5.93   |   |
| 10208 | Gcsh            | -1.34 | 81  | 14.79  | 44  | 11.03  |   |
| 10209 | Atxn2           | -1.34 | 512 | 25.91  | 285 | 19.32  |   |
| 10210 | RGD1359108      | -1.34 | 47  | 6.73   | 32  | 5.02   |   |
| 10211 | Cndp2           | -1.34 | 123 | 13.96  | 63  | 10.4   |   |
| 10212 | Larp7           | -1.34 | 122 | 16.23  | 64  | 12.1   |   |
| 10213 | Fgd3            | -1.34 | 162 | 6.59   | 77  | 4.91   |   |
| 10214 | Ctbp2           | -1.34 | 278 | 15.89  | 134 | 11.83  |   |
| 10215 | Dtd1            | -1.34 | 109 | 15.83  | 66  | 11.78  |   |
| 10216 | Etaa1l1         | -1.34 | 82  | 6.27   | 42  | 4.66   |   |
| 10217 | Hnrnp3          | -1.34 | 180 | 7.82   | 127 | 5.82   |   |
| 10218 | Morf4l1         | -1.34 | 252 | 126.12 | 150 | 93.87  |   |
| 10219 | Rab12           | -1.34 | 152 | 27.69  | 80  | 20.61  |   |
| 10220 | Sfpq            | -1.34 | 651 | 55.97  | 362 | 41.62  |   |
| 10221 | Mtdh            | -1.35 | 182 | 24.01  | 110 | 17.85  |   |
| 10222 | R3hcc1l         | -1.35 | 73  | 4.52   | 53  | 3.36   |   |
| 10223 | Acbd3           | -1.35 | 472 | 24.51  | 239 | 18.21  |   |
| 10224 | Ptpn3           | -1.35 | 83  | 1.48   | 43  | 1.1    |   |
| 10225 | RGD1311558      | -1.35 | 75  | 4.92   | 39  | 3.65   |   |
| 10226 | Acot7           | -1.35 | 167 | 13.25  | 69  | 9.84   |   |
| 10227 | Usp25           | -1.35 | 256 | 14.57  | 151 | 10.81  |   |
| 10228 | Sf1             | -1.35 | 995 | 65.06  | 530 | 48.29  |   |
| 10229 | Rgmb            | -1.35 | 57  | 8.93   | 27  | 6.63   |   |
| 10230 | Tmem65          | -1.35 | 248 | 4.77   | 131 | 3.54   |   |
| 10231 | Commd10         | -1.35 | 118 | 16.55  | 60  | 12.28  |   |
| 10232 | Nup54           | -1.35 | 119 | 10.12  | 72  | 7.51   |   |
| 10233 | Exosc7          | -1.35 | 76  | 11.72  | 45  | 8.69   |   |
| 10234 | Ska2            | -1.35 | 92  | 10.27  | 69  | 7.61   |   |
| 10235 | Stk3            | -1.35 | 260 | 13.32  | 141 | 9.88   |   |
| 10236 | RGD1562948      | -1.35 | 133 | 18.29  | 72  | 13.56  |   |
| 10237 | Chchd2          | -1.35 | 0   | 18.61  | 0   | 13.78  |   |
| 10238 | Pik3ca          | -1.35 | 238 | 14     | 118 | 10.37  |   |
| 10239 | Smim7           | -1.35 | 221 | 40.43  | 111 | 29.94  |   |
| 10240 | Tubgcp4         | -1.35 | 150 | 10.83  | 79  | 8.02   |   |
| 10241 | Eef1b2          | -1.35 | 625 | 165.87 | 316 | 122.83 |   |
| 10242 | Degs1           | -1.35 | 419 | 72.83  | 219 | 53.92  |   |
| 10243 | Gapdh           | -1.35 | 60  | 380.21 | 38  | 281.49 |   |
| 10244 | Htt             | -1.35 | 595 | 9.24   | 300 | 6.84   |   |
| 10245 | Vps13a          | -1.35 | 126 | 3.91   | 67  | 2.89   |   |
| 10246 | RGD1563812      | -1.35 | 129 | 47.81  | 60  | 35.36  |   |
| 10247 | Zdhhc2          | -1.35 | 371 | 42.08  | 194 | 31.09  |   |
| 10248 | Chmp4bl1        | -1.35 | 86  | 28.38  | 43  | 20.97  |   |
| 10249 | ENSRNOG00000054 | -1.35 | 101 | 6.15   | 43  | 4.55   |   |
| 10250 | Oxsr1           | -1.35 | 467 | 20.15  | 237 | 14.88  |   |
| 10251 | Dnrtip2         | -1.35 | 196 | 18.4   | 102 | 13.58  |   |
| 10252 | Cox7b           | -1.35 | 64  | 65.68  | 35  | 48.48  |   |
| 10253 | Rcan2           | -1.35 | 178 | 8.66   | 82  | 6.39   |   |
| 10254 | Wipi2           | -1.36 | 165 | 17.07  | 90  | 12.6   |   |
| 10255 | Cstf2           | -1.36 | 305 | 13.44  | 165 | 9.91   |   |

Supplemental Table 2  
Vehicle versus FSH, 24 hours

|       | A              | B     | C    | D      | E    | F      | G |
|-------|----------------|-------|------|--------|------|--------|---|
| 10256 | Eif5           | -1.36 | 466  | 56.16  | 235  | 41.42  |   |
| 10257 | LOC690251      | -1.36 | 0    | 7.63   | 0    | 5.62   |   |
| 10258 | Tmf1           | -1.36 | 297  | 18.85  | 170  | 13.88  |   |
| 10259 | Hras           | -1.36 | 106  | 26.21  | 63   | 19.31  |   |
| 10260 | Pak4           | -1.36 | 244  | 19.65  | 121  | 14.47  |   |
| 10261 | Dclre1a        | -1.36 | 105  | 4.66   | 63   | 3.43   |   |
| 10262 | Exoc8          | -1.36 | 75   | 7.37   | 38   | 5.42   |   |
| 10263 | Gorasp2_1      | -1.36 | 21   | 37.35  | 11   | 27.48  |   |
| 10264 | Pgap1          | -1.36 | 104  | 6.21   | 50   | 4.57   |   |
| 10265 | Pgm3           | -1.36 | 90   | 8.16   | 43   | 6      |   |
| 10266 | Afg3l1         | -1.36 | 265  | 23.67  | 141  | 17.41  |   |
| 10267 | Rfc3           | -1.36 | 99   | 16.32  | 50   | 11.99  |   |
| 10268 | Mysm1          | -1.36 | 146  | 8.32   | 87   | 6.12   |   |
| 10269 | Dbnl           | -1.36 | 267  | 27.9   | 150  | 20.51  |   |
| 10270 | Vezt           | -1.36 | 146  | 7.7    | 71   | 5.66   |   |
| 10271 | Phax           | -1.36 | 122  | 15.89  | 63   | 11.66  |   |
| 10272 | Dync1li2       | -1.36 | 647  | 30.03  | 336  | 22.04  |   |
| 10273 | Ube2d3         | -1.36 | 559  | 77.68  | 288  | 57     |   |
| 10274 | Mapkbp1        | -1.36 | 504  | 17.38  | 277  | 12.76  |   |
| 10275 | Sh3bp5l        | -1.36 | 239  | 17.29  | 111  | 12.68  |   |
| 10276 | LOC100910710   | -1.36 | 107  | 27.99  | 56   | 20.53  |   |
| 10277 | Prosc          | -1.36 | 124  | 12.78  | 61   | 9.37   |   |
| 10278 | AABR07028886.3 | -1.36 | 16   | 17.89  | 5    | 13.12  |   |
| 10279 | AW549877       | -1.36 | 126  | 5.91   | 70   | 4.33   |   |
| 10280 | Mybl2          | -1.36 | 120  | 7.32   | 68   | 5.37   |   |
| 10281 | Dhx29          | -1.36 | 247  | 12.2   | 123  | 8.94   |   |
| 10282 | Hnrnpu         | -1.36 | 1518 | 92.28  | 800  | 67.63  |   |
| 10283 | Pld2           | -1.36 | 160  | 10.25  | 76   | 7.51   |   |
| 10284 | AABR07070032.1 | -1.36 | 61   | 222.04 | 41   | 162.73 |   |
| 10285 | Ugp2           | -1.36 | 146  | 13.69  | 73   | 10.03  |   |
| 10286 | Abcf1          | -1.37 | 557  | 40.98  | 277  | 30.01  |   |
| 10287 | LOC100362149   | -1.37 | 306  | 507.74 | 272  | 371.43 |   |
| 10288 | Prc1           | -1.37 | 159  | 12.51  | 81   | 9.15   |   |
| 10289 | Dbn1           | -1.37 | 685  | 55.89  | 342  | 40.85  |   |
| 10290 | AABR07002177.1 | -1.37 | 41   | 27.31  | 15   | 19.95  |   |
| 10291 | Zbtb20         | -1.37 | 797  | 15.46  | 476  | 11.29  |   |
| 10292 | Myef2          | -1.37 | 333  | 22.79  | 208  | 16.65  |   |
| 10293 | Dync1li1       | -1.37 | 232  | 26.54  | 112  | 19.38  |   |
| 10294 | Dynlt1         | -1.37 | 229  | 68.7   | 107  | 50.16  |   |
| 10295 | Mtmr11         | -1.37 | 261  | 18.83  | 130  | 13.75  |   |
| 10296 | Rnh1           | -1.37 | 453  | 56.14  | 239  | 40.98  |   |
| 10297 | Dyrk2          | -1.37 | 237  | 9.74   | 116  | 7.11   |   |
| 10298 | Rpl11          | -1.37 | 841  | 58.19  | 415  | 42.47  |   |
| 10299 | Hdlbp          | -1.37 | 4388 | 146.31 | 2253 | 106.77 |   |
| 10300 | Plaa           | -1.37 | 258  | 21.55  | 125  | 15.72  |   |
| 10301 | Rpl6           | -1.37 | 153  | 329.72 | 74   | 240.57 |   |
| 10302 | Cln6           | -1.37 | 309  | 11.58  | 146  | 8.45   |   |
| 10303 | March7         | -1.37 | 372  | 24.49  | 202  | 17.86  |   |
| 10304 | Larp4b         | -1.37 | 320  | 26.66  | 157  | 19.44  |   |
| 10305 | Purb           | -1.37 | 276  | 28.08  | 139  | 20.48  |   |
| 10306 | Tgfbr1_2       | -1.38 | 0    | 0.39   | 0    | 0.28   |   |
| 10307 | Tmem263        | -1.38 | 320  | 17.38  | 224  | 12.63  |   |
| 10308 | 5_8S_rRNA_4    | -1.38 | 2    | 6.47   | 2    | 4.7    |   |
| 10309 | 5S_rRNA_118    | -1.38 | 0    | 4.7    | 0    | 3.42   |   |

Supplemental Table 2  
Vehicle versus FSH, 24 hours

|       | A              | B     | C   | D    | E   | F    | G |
|-------|----------------|-------|-----|------|-----|------|---|
| 10310 | 7SK_354        | -1.38 | 2   | 1.77 | 1   | 1.28 |   |
| 10311 | AABR07001435.1 | -1.38 | 11  | 2.02 | 4   | 1.47 |   |
| 10312 | AABR07001497.1 | -1.38 | 4   | 1.89 | 4   | 1.37 |   |
| 10313 | AABR07001512.1 | -1.38 | 2   | 0.93 | 1   | 0.68 |   |
| 10314 | AABR07002247.1 | -1.38 | 14  | 0.33 | 7   | 0.24 |   |
| 10315 | AABR07002493.1 | -1.38 | 22  | 0.61 | 11  | 0.45 |   |
| 10316 | AABR07002775.1 | -1.38 | 0   | 0.27 | 0   | 0.2  |   |
| 10317 | AABR07004404.1 | -1.38 | 3   | 1.35 | 6   | 0.98 |   |
| 10318 | AABR07021930.1 | -1.38 | 2   | 0.37 | 2   | 0.27 |   |
| 10319 | AABR07024593.2 | -1.38 | 2   | 3.92 | 1   | 2.85 |   |
| 10320 | AABR07027722.1 | -1.38 | 0   | 4.7  | 0   | 3.42 |   |
| 10321 | AABR07034669.1 | -1.38 | 32  | 0.78 | 35  | 0.57 |   |
| 10322 | AABR07043844.1 | -1.38 | 2   | 1.11 | 1   | 0.81 |   |
| 10323 | AABR07053734.1 | -1.38 | 0   | 1.25 | 0   | 0.91 |   |
| 10324 | AABR07065593.2 | -1.38 | 0   | 0.25 | 0   | 0.18 |   |
| 10325 | AABR07071697.1 | -1.38 | 27  | 6.93 | 18  | 5.03 |   |
| 10326 | AABR07073038.2 | -1.38 | 12  | 1.8  | 17  | 1.31 |   |
| 10327 | AC093965.1     | -1.38 | 0   | 2.37 | 0   | 1.72 |   |
| 10328 | AC096809.1     | -1.38 | 2   | 0.73 | 1   | 0.53 |   |
| 10329 | AC118490.1     | -1.38 | 1   | 0.91 | 1   | 0.66 |   |
| 10330 | AC119011.1     | -1.38 | 2   | 0.64 | 1   | 0.47 |   |
| 10331 | AC131885.1     | -1.38 | 0   | 5.14 | 0   | 3.73 |   |
| 10332 | AC141136.1     | -1.38 | 2   | 0.4  | 3   | 0.29 |   |
| 10333 | AC142154.1     | -1.38 | 0   | 0.21 | 0   | 0.15 |   |
| 10334 | Adam12         | -1.38 | 14  | 0.17 | 15  | 0.12 |   |
| 10335 | Adprhl1        | -1.38 | 47  | 0.51 | 19  | 0.37 |   |
| 10336 | Adra2c         | -1.38 | 2   | 0.29 | 1   | 0.21 |   |
| 10337 | Agbl2          | -1.38 | 5   | 0.19 | 4   | 0.14 |   |
| 10338 | Akap6          | -1.38 | 38  | 0.06 | 24  | 0.04 |   |
| 10339 | Alpk2          | -1.38 | 2   | 0.08 | 4   | 0.06 |   |
| 10340 | Angptl6        | -1.38 | 1   | 0.32 | 1   | 0.23 |   |
| 10341 | Ankrd29_2      | -1.38 | 8   | 0.88 | 4   | 0.64 |   |
| 10342 | Ap5s1          | -1.38 | 27  | 2.82 | 12  | 2.05 |   |
| 10343 | Arap2          | -1.38 | 65  | 1.44 | 35  | 1.04 |   |
| 10344 | Arfgef3        | -1.38 | 5   | 0.07 | 3   | 0.05 |   |
| 10345 | Arhgap27       | -1.38 | 2   | 0.19 | 3   | 0.14 |   |
| 10346 | Arhgef15       | -1.38 | 1   | 0.12 | 1   | 0.09 |   |
| 10347 | B3gntl1        | -1.38 | 47  | 1.65 | 52  | 1.2  |   |
| 10348 | Bbip1          | -1.38 | 4   | 2.48 | 1   | 1.8  |   |
| 10349 | Bend4          | -1.38 | 27  | 3.06 | 14  | 2.22 |   |
| 10350 | Bend6          | -1.38 | 7   | 0.5  | 6   | 0.36 |   |
| 10351 | Bhlha15        | -1.38 | 2   | 0.14 | 1   | 0.1  |   |
| 10352 | Birc3          | -1.38 | 16  | 1.32 | 10  | 0.96 |   |
| 10353 | C1ql3          | -1.38 | 3   | 0.65 | 2   | 0.47 |   |
| 10354 | C1qtnf5        | -1.38 | 2   | 0.37 | 1   | 0.27 |   |
| 10355 | Cabp1          | -1.38 | 38  | 0.31 | 15  | 0.23 |   |
| 10356 | Cacnb4         | -1.38 | 10  | 0.13 | 4   | 0.1  |   |
| 10357 | Car5b          | -1.38 | 6   | 0.53 | 7   | 0.38 |   |
| 10358 | Ccdc30         | -1.38 | 14  | 0.19 | 23  | 0.14 |   |
| 10359 | Coro6          | -1.38 | 4   | 0.39 | 2   | 0.28 |   |
| 10360 | Crebl2         | -1.38 | 14  | 0.23 | 22  | 0.17 |   |
| 10361 | Crip1          | -1.38 | 5   | 1.08 | 2   | 0.78 |   |
| 10362 | Csnk1g1        | -1.38 | 186 | 3.41 | 105 | 2.48 |   |
| 10363 | Ctrb1          | -1.38 | 3   | 0.57 | 2   | 0.41 |   |



Supplemental Table 2  
Vehicle versus FSH, 24 hours

|       | A               | B     | C   | D     | E   | F     | G |
|-------|-----------------|-------|-----|-------|-----|-------|---|
| 10364 | Cul5            | -1.38 | 278 | 16.33 | 147 | 11.86 |   |
| 10365 | Cutc            | -1.38 | 31  | 3.06  | 25  | 2.22  |   |
| 10366 | Cxxc5_2         | -1.38 | 2   | 1.1   | 2   | 0.8   |   |
| 10367 | Cyp27b1         | -1.38 | 5   | 0.41  | 2   | 0.3   |   |
| 10368 | Cys1            | -1.38 | 20  | 1.18  | 12  | 0.86  |   |
| 10369 | Dcp2_2          | -1.38 | 0   | 1.04  | 0   | 0.76  |   |
| 10370 | Dkk4            | -1.38 | 41  | 3.34  | 29  | 2.43  |   |
| 10371 | Dpp4            | -1.38 | 4   | 0.1   | 2   | 0.07  |   |
| 10372 | Ebi3            | -1.38 | 4   | 0.41  | 1   | 0.3   |   |
| 10373 | Efcab2          | -1.38 | 45  | 0.89  | 49  | 0.65  |   |
| 10374 | Elovl7          | -1.38 | 10  | 2.78  | 6   | 2.02  |   |
| 10375 | Enpp3           | -1.38 | 9   | 0.36  | 4   | 0.26  |   |
| 10376 | ENSRNOG00000054 | -1.38 | 2   | 0.77  | 0   | 0.56  |   |
| 10377 | ENSRNOG00000056 | -1.38 | 2   | 1.58  | 1   | 1.15  |   |
| 10378 | Esrp1           | -1.38 | 7   | 0.38  | 3   | 0.28  |   |
| 10379 | Fam134b_2       | -1.38 | 0   | 0.95  | 0   | 0.69  |   |
| 10380 | Fam83b          | -1.38 | 12  | 0.31  | 9   | 0.22  |   |
| 10381 | Fbxw12          | -1.38 | 4   | 0.35  | 2   | 0.25  |   |
| 10382 | Fer1l5          | -1.38 | 16  | 0.15  | 5   | 0.11  |   |
| 10383 | Fkbp2           | -1.38 | 58  | 22.83 | 27  | 16.59 |   |
| 10384 | Gdf6            | -1.38 | 7   | 0.43  | 3   | 0.31  |   |
| 10385 | Got1l1          | -1.38 | 26  | 0.7   | 7   | 0.51  |   |
| 10386 | Gpr156          | -1.38 | 7   | 0.21  | 7   | 0.15  |   |
| 10387 | Gulo            | -1.38 | 6   | 0.65  | 3   | 0.47  |   |
| 10388 | Hgf             | -1.38 | 5   | 0.08  | 2   | 0.06  |   |
| 10389 | Hmgb3_1         | -1.38 | 3   | 2.95  | 1   | 2.15  |   |
| 10390 | Igf2bp2         | -1.38 | 16  | 0.41  | 5   | 0.3   |   |
| 10391 | Ipo7            | -1.38 | 450 | 20.19 | 226 | 14.67 |   |
| 10392 | Irgm            | -1.38 | 10  | 1.1   | 9   | 0.8   |   |
| 10393 | Katnal1_2       | -1.38 | 0   | 1.99  | 0   | 1.45  |   |
| 10394 | Kcnj4           | -1.38 | 2   | 0.19  | 3   | 0.14  |   |
| 10395 | Kctd7           | -1.38 | 66  | 10.12 | 33  | 7.35  |   |
| 10396 | Ky              | -1.38 | 4   | 0.09  | 1   | 0.07  |   |
| 10397 | Lama3           | -1.38 | 6   | 0.19  | 5   | 0.14  |   |
| 10398 | LOC100360137    | -1.38 | 0   | 2.56  | 0   | 1.86  |   |
| 10399 | LOC100362342    | -1.38 | 3   | 0.65  | 2   | 0.47  |   |
| 10400 | LOC100364116    | -1.38 | 1   | 4.08  | 0   | 2.97  |   |
| 10401 | LOC100910173    | -1.38 | 21  | 3.39  | 16  | 2.46  |   |
| 10402 | LOC100910214    | -1.38 | 1   | 0.33  | 0   | 0.24  |   |
| 10403 | LOC100910318_2  | -1.38 | 0   | 3.53  | 0   | 2.57  |   |
| 10404 | LOC100910336    | -1.38 | 1   | 12.62 | 0   | 9.17  |   |
| 10405 | LOC100911295    | -1.38 | 0   | 1.71  | 0   | 1.24  |   |
| 10406 | LOC100911456    | -1.38 | 0   | 0.85  | 0   | 0.62  |   |
| 10407 | LOC102556119    | -1.38 | 2   | 0.19  | 1   | 0.14  |   |
| 10408 | LOC288978       | -1.38 | 16  | 0.45  | 9   | 0.33  |   |
| 10409 | LOC364556       | -1.38 | 9   | 0.23  | 1   | 0.17  |   |
| 10410 | LOC684841       | -1.38 | 2   | 1.21  | 1   | 0.88  |   |
| 10411 | LOC688130       | -1.38 | 2   | 0.6   | 1   | 0.44  |   |
| 10412 | Lzts3           | -1.38 | 28  | 2.4   | 15  | 1.74  |   |
| 10413 | Mapk1ip1l       | -1.38 | 473 | 28.21 | 261 | 20.5  |   |
| 10414 | Metazoa_SRP_25  | -1.38 | 0   | 1.85  | 0   | 1.34  |   |
| 10415 | Metazoa_SRP_31  | -1.38 | 0   | 1.67  | 0   | 1.21  |   |
| 10416 | MGC105649       | -1.38 | 2   | 0.43  | 2   | 0.31  |   |
| 10417 | Mpp7            | -1.38 | 17  | 0.23  | 4   | 0.16  |   |

Supplemental Table 2  
Vehicle versus FSH, 24 hours

|       | A              | B     | C   | D     | E   | F     | G |
|-------|----------------|-------|-----|-------|-----|-------|---|
| 10418 | Mrps15         | -1.38 | 96  | 9.51  | 51  | 6.91  |   |
| 10419 | Mtus1          | -1.38 | 208 | 5.57  | 92  | 4.04  |   |
| 10420 | Myh14          | -1.38 | 9   | 0.23  | 3   | 0.16  |   |
| 10421 | Myoc           | -1.38 | 1   | 0.24  | 1   | 0.18  |   |
| 10422 | Nav1           | -1.38 | 31  | 0.65  | 15  | 0.47  |   |
| 10423 | Ndufa5         | -1.38 | 95  | 33.77 | 50  | 24.54 |   |
| 10424 | Nid2           | -1.38 | 73  | 1.64  | 37  | 1.19  |   |
| 10425 | Nipal4         | -1.38 | 2   | 0.15  | 1   | 0.11  |   |
| 10426 | Nol4           | -1.38 | 14  | 0.1   | 9   | 0.07  |   |
| 10427 | Nr1h4          | -1.38 | 13  | 0.61  | 8   | 0.44  |   |
| 10428 | Paip2b         | -1.38 | 32  | 8.45  | 24  | 6.14  |   |
| 10429 | Pdk3           | -1.38 | 78  | 8.21  | 50  | 5.96  |   |
| 10430 | Pggt1b         | -1.38 | 68  | 7.97  | 44  | 5.79  |   |
| 10431 | Pld6           | -1.38 | 9   | 1.14  | 2   | 0.83  |   |
| 10432 | Pnpla1         | -1.38 | 4   | 0.17  | 3   | 0.12  |   |
| 10433 | Ppil3          | -1.38 | 64  | 12.13 | 35  | 8.81  |   |
| 10434 | Ppp2r2b        | -1.38 | 13  | 0.25  | 24  | 0.18  |   |
| 10435 | Prdm16         | -1.38 | 4   | 0.06  | 3   | 0.04  |   |
| 10436 | Prox1          | -1.38 | 11  | 0.28  | 6   | 0.2   |   |
| 10437 | Prr5           | -1.38 | 7   | 0.26  | 5   | 0.19  |   |
| 10438 | Ptchd3         | -1.38 | 3   | 0.15  | 1   | 0.11  |   |
| 10439 | Rab20          | -1.38 | 24  | 3.03  | 11  | 2.2   |   |
| 10440 | Rab5c          | -1.38 | 414 | 50.76 | 219 | 36.88 |   |
| 10441 | Rccd1          | -1.38 | 5   | 0.44  | 6   | 0.32  |   |
| 10442 | Rec114         | -1.38 | 20  | 1.05  | 7   | 0.76  |   |
| 10443 | RGD1305537_2   | -1.38 | 0   | 0.29  | 0   | 0.21  |   |
| 10444 | RGD1559441     | -1.38 | 13  | 0.1   | 6   | 0.08  |   |
| 10445 | RGD1559909     | -1.38 | 57  | 19.96 | 29  | 14.5  |   |
| 10446 | RGD1560789     | -1.38 | 0   | 1.85  | 0   | 1.34  |   |
| 10447 | RGD1561796     | -1.38 | 5   | 0.87  | 9   | 0.63  |   |
| 10448 | RGD1562381     | -1.38 | 1   | 1.19  | 1   | 0.86  |   |
| 10449 | RGD1564138     | -1.38 | 2   | 1.12  | 1   | 0.82  |   |
| 10450 | Rhoh           | -1.38 | 6   | 0.33  | 3   | 0.24  |   |
| 10451 | Rin3           | -1.38 | 33  | 1.41  | 19  | 1.03  |   |
| 10452 | Rn60_15_0538.1 | -1.38 | 2   | 0.6   | 1   | 0.43  |   |
| 10453 | Rpusd4         | -1.38 | 51  | 4.98  | 29  | 3.62  |   |
| 10454 | Rrm2b          | -1.38 | 22  | 2.49  | 20  | 1.81  |   |
| 10455 | Sall3          | -1.38 | 2   | 0.1   | 1   | 0.07  |   |
| 10456 | Sec14l4        | -1.38 | 8   | 0.06  | 1   | 0.04  |   |
| 10457 | Sh2d5          | -1.38 | 3   | 0.13  | 2   | 0.1   |   |
| 10458 | She            | -1.38 | 3   | 0.3   | 3   | 0.22  |   |
| 10459 | Sim1           | -1.38 | 1   | 0.06  | 2   | 0.05  |   |
| 10460 | Slc19a2        | -1.38 | 66  | 3.03  | 35  | 2.2   |   |
| 10461 | Slc26a8        | -1.38 | 49  | 1.75  | 48  | 1.27  |   |
| 10462 | Slc7a6os       | -1.38 | 123 | 17.33 | 60  | 12.59 |   |
| 10463 | Slc9a7         | -1.38 | 222 | 1.75  | 103 | 1.27  |   |
| 10464 | Smndc1         | -1.38 | 142 | 12.29 | 70  | 8.93  |   |
| 10465 | SNORA73_10     | -1.38 | 2   | 2.33  | 1   | 1.69  |   |
| 10466 | SNORD88_2      | -1.38 | 2   | 5.48  | 1   | 3.98  |   |
| 10467 | Snx7           | -1.38 | 102 | 12.52 | 53  | 9.09  |   |
| 10468 | Sptbn4         | -1.38 | 9   | 0.06  | 6   | 0.04  |   |
| 10469 | Sstr1          | -1.38 | 2   | 0.13  | 1   | 0.09  |   |
| 10470 | Stard8         | -1.38 | 18  | 0.71  | 10  | 0.52  |   |
| 10471 | Steap4         | -1.38 | 4   | 0.15  | 4   | 0.11  |   |

Supplemental Table 2  
Vehicle versus FSH, 24 hours

|       | A              | B     | C    | D     | E    | F     | G |
|-------|----------------|-------|------|-------|------|-------|---|
| 10472 | Stk32c         | -1.38 | 6    | 0.23  | 8    | 0.17  |   |
| 10473 | Sult1d1        | -1.38 | 3    | 0.19  | 2    | 0.14  |   |
| 10474 | Tbx1           | -1.38 | 2    | 0.27  | 1    | 0.2   |   |
| 10475 | Tbx19          | -1.38 | 19   | 0.39  | 9    | 0.28  |   |
| 10476 | Timp1          | -1.38 | 120  | 80.81 | 75   | 58.71 |   |
| 10477 | Tmem106a       | -1.38 | 27   | 2.52  | 12   | 1.83  |   |
| 10478 | Tmem194        | -1.38 | 9    | 2.09  | 3    | 1.52  |   |
| 10479 | Tmem88         | -1.38 | 10   | 1.91  | 5    | 1.39  |   |
| 10480 | Tmprss5        | -1.38 | 3    | 0.21  | 6    | 0.15  |   |
| 10481 | Tomm40         | -1.38 | 154  | 33.04 | 83   | 24    |   |
| 10482 | Trim50         | -1.38 | 4    | 0.24  | 5    | 0.18  |   |
| 10483 | Ttc30a1        | -1.38 | 2    | 0.41  | 1    | 0.3   |   |
| 10484 | Uba7           | -1.38 | 10   | 0.57  | 10   | 0.41  |   |
| 10485 | Wisp2          | -1.38 | 14   | 1.1   | 5    | 0.8   |   |
| 10486 | Zfp111         | -1.38 | 0    | 0.22  | 0    | 0.16  |   |
| 10487 | Zfp385d        | -1.38 | 79   | 1.44  | 51   | 1.04  |   |
| 10488 | 5S_rRNA_259    | -1.38 | 0    | 4.19  | 0    | 3.04  |   |
| 10489 | AABR07014259.1 | -1.38 | 1    | 2.44  | 1    | 1.77  |   |
| 10490 | AABR07018970.1 | -1.38 | 1    | 0.58  | 0    | 0.42  |   |
| 10491 | AABR07021465.2 | -1.38 | 4    | 1.29  | 2    | 0.94  |   |
| 10492 | AABR07030156.1 | -1.38 | 2    | 2.08  | 0    | 1.51  |   |
| 10493 | AABR07030897.1 | -1.38 | 2    | 0.14  | 2    | 0.1   |   |
| 10494 | AABR07048271.1 | -1.38 | 2    | 1.03  | 4    | 0.74  |   |
| 10495 | AABR07049960.1 | -1.38 | 0    | 0.82  | 0    | 0.6   |   |
| 10496 | AABR07051374.1 | -1.38 | 0    | 2.39  | 0    | 1.74  |   |
| 10497 | AABR07053152.1 | -1.38 | 2    | 6.23  | 1    | 4.53  |   |
| 10498 | AABR07059786.1 | -1.38 | 1    | 0.74  | 0    | 0.54  |   |
| 10499 | AABR07066516.1 | -1.38 | 6    | 1.94  | 2    | 1.41  |   |
| 10500 | AABR07067506.1 | -1.38 | 0    | 1.08  | 0    | 0.78  |   |
| 10501 | AABR07073453.1 | -1.38 | 11   | 0.49  | 4    | 0.35  |   |
| 10502 | Aaed1          | -1.38 | 215  | 3.87  | 114  | 2.81  |   |
| 10503 | AC120310.1     | -1.38 | 0    | 0.74  | 0    | 0.54  |   |
| 10504 | Acer1          | -1.38 | 5    | 0.21  | 2    | 0.15  |   |
| 10505 | Acyp2          | -1.38 | 16   | 1.31  | 16   | 0.95  |   |
| 10506 | Adam4          | -1.38 | 2    | 0.2   | 1    | 0.15  |   |
| 10507 | Adamts1        | -1.38 | 18   | 0.26  | 19   | 0.19  |   |
| 10508 | Adamts14       | -1.38 | 18   | 0.72  | 7    | 0.52  |   |
| 10509 | Amt            | -1.38 | 13   | 0.82  | 7    | 0.6   |   |
| 10510 | Anks4b         | -1.38 | 4    | 0.55  | 2    | 0.4   |   |
| 10511 | Apip           | -1.38 | 16   | 2.06  | 6    | 1.49  |   |
| 10512 | Apol9a         | -1.38 | 0    | 0.93  | 1    | 0.67  |   |
| 10513 | Aqp11          | -1.38 | 4    | 0.39  | 1    | 0.28  |   |
| 10514 | Atxn7l4        | -1.38 | 135  | 2.64  | 114  | 1.92  |   |
| 10515 | Avpr1a         | -1.38 | 2    | 0.26  | 1    | 0.19  |   |
| 10516 | AY172581.23    | -1.38 | 2    | 7.33  | 1    | 5.32  |   |
| 10517 | Cacna1e        | -1.38 | 135  | 0.07  | 46   | 0.05  |   |
| 10518 | Ccdc73         | -1.38 | 7    | 0.14  | 5    | 0.1   |   |
| 10519 | Cd8b           | -1.38 | 2    | 0.34  | 1    | 0.25  |   |
| 10520 | Cdc45          | -1.38 | 63   | 1.48  | 30   | 1.08  |   |
| 10521 | Cdkn2c         | -1.38 | 24   | 2.78  | 9    | 2.02  |   |
| 10522 | Cend1_1        | -1.38 | 1    | 0.3   | 1    | 0.22  |   |
| 10523 | Cetn4          | -1.38 | 2    | 0.99  | 1    | 0.72  |   |
| 10524 | Chd5           | -1.38 | 4    | 0.13  | 3    | 0.1   |   |
| 10525 | Cntnap5a       | -1.38 | 2129 | 0.13  | 2569 | 0.09  |   |

Supplemental Table 2  
Vehicle versus FSH, 24 hours

|       | A              | B     | C   | D     | E   | F     | G |
|-------|----------------|-------|-----|-------|-----|-------|---|
| 10526 | Col1a2         | -1.38 | 0   | 2.56  | 0   | 1.86  |   |
| 10527 | Col23a1_1      | -1.38 | 0   | 0.42  | 0   | 0.3   |   |
| 10528 | Cpne2          | -1.38 | 66  | 7.26  | 30  | 5.27  |   |
| 10529 | Cpvl           | -1.38 | 12  | 0.19  | 6   | 0.13  |   |
| 10530 | Dazl           | -1.38 | 2   | 0.17  | 1   | 0.13  |   |
| 10531 | Dffa           | -1.38 | 112 | 7.17  | 61  | 5.21  |   |
| 10532 | Dnmt3b         | -1.38 | 18  | 0.61  | 13  | 0.44  |   |
| 10533 | Doc2a          | -1.38 | 1   | 0.34  | 1   | 0.25  |   |
| 10534 | Dok5           | -1.38 | 6   | 0.31  | 11  | 0.23  |   |
| 10535 | Dpm3           | -1.38 | 22  | 12.65 | 10  | 9.19  |   |
| 10536 | Duxbl1         | -1.38 | 8   | 0.25  | 6   | 0.18  |   |
| 10537 | Eif1ad         | -1.38 | 84  | 6.84  | 42  | 4.97  |   |
| 10538 | Eml5           | -1.38 | 70  | 0.69  | 41  | 0.5   |   |
| 10539 | Fam185a        | -1.38 | 3   | 0.95  | 1   | 0.69  |   |
| 10540 | Fgd4           | -1.38 | 72  | 1.64  | 40  | 1.19  |   |
| 10541 | Fignl1         | -1.38 | 9   | 0.86  | 6   | 0.63  |   |
| 10542 | Gab2           | -1.38 | 484 | 26.49 | 263 | 19.25 |   |
| 10543 | Gabra1         | -1.38 | 2   | 0.11  | 2   | 0.08  |   |
| 10544 | Gdf15          | -1.38 | 6   | 1.64  | 3   | 1.19  |   |
| 10545 | Hcls1          | -1.38 | 3   | 0.26  | 2   | 0.19  |   |
| 10546 | Igf2bp1        | -1.38 | 7   | 0.24  | 2   | 0.17  |   |
| 10547 | Il13ra2        | -1.38 | 5   | 0.19  | 2   | 0.14  |   |
| 10548 | Il17rd         | -1.38 | 14  | 0.31  | 5   | 0.22  |   |
| 10549 | Ing2           | -1.38 | 45  | 3.46  | 22  | 2.51  |   |
| 10550 | Kl             | -1.38 | 4   | 0.13  | 2   | 0.09  |   |
| 10551 | Knop1_1        | -1.38 | 0   | 0.44  | 0   | 0.32  |   |
| 10552 | Lactb2         | -1.38 | 49  | 8.71  | 24  | 6.33  |   |
| 10553 | Lax1           | -1.38 | 2   | 0.23  | 2   | 0.16  |   |
| 10554 | Lcn2           | -1.38 | 4   | 1.12  | 2   | 0.81  |   |
| 10555 | Leng9          | -1.38 | 14  | 2.39  | 11  | 1.74  |   |
| 10556 | LOC100302465   | -1.38 | 12  | 0.16  | 6   | 0.12  |   |
| 10557 | LOC100359574   | -1.38 | 0   | 2.58  | 0   | 1.87  |   |
| 10558 | LOC100359668   | -1.38 | 0   | 0.9   | 0   | 0.66  |   |
| 10559 | LOC100910721_2 | -1.38 | 0   | 1.1   | 0   | 0.8   |   |
| 10560 | LOC100910807   | -1.38 | 1   | 0.39  | 1   | 0.28  |   |
| 10561 | LOC100912008   | -1.38 | 3   | 1.01  | 2   | 0.74  |   |
| 10562 | LOC679247      | -1.38 | 5   | 0.72  | 2   | 0.52  |   |
| 10563 | LOC679565      | -1.38 | 0   | 0.33  | 0   | 0.24  |   |
| 10564 | Lurap1         | -1.38 | 13  | 2.12  | 6   | 1.54  |   |
| 10565 | Mettl1         | -1.38 | 32  | 3.35  | 17  | 2.43  |   |
| 10566 | Mlf1           | -1.38 | 4   | 0.45  | 3   | 0.33  |   |
| 10567 | Mrpl43         | -1.38 | 64  | 19.21 | 34  | 13.96 |   |
| 10568 | Mterf          | -1.38 | 35  | 3.65  | 21  | 2.65  |   |
| 10569 | Ncan           | -1.38 | 3   | 0.1   | 2   | 0.07  |   |
| 10570 | Ncapg2         | -1.38 | 106 | 3.19  | 61  | 2.31  |   |
| 10571 | Ndufa13_1      | -1.38 | 2   | 1.16  | 1   | 0.84  |   |
| 10572 | Nhs12          | -1.38 | 12  | 0.79  | 6   | 0.58  |   |
| 10573 | Nlrp9          | -1.38 | 7   | 0.33  | 3   | 0.24  |   |
| 10574 | Npm2           | -1.38 | 5   | 1.6   | 2   | 1.16  |   |
| 10575 | Nr6a1          | -1.38 | 19  | 1.89  | 20  | 1.37  |   |
| 10576 | Ntrk2          | -1.38 | 13  | 0.05  | 9   | 0.03  |   |
| 10577 | Nup210l        | -1.38 | 37  | 0.09  | 20  | 0.06  |   |
| 10578 | Nupl1          | -1.38 | 204 | 12.47 | 100 | 9.06  |   |
| 10579 | Parp16         | -1.38 | 33  | 2.57  | 17  | 1.87  |   |

Supplemental Table 2  
Vehicle versus FSH, 24 hours

|       | A              | B     | C    | D     | E    | F     | G |
|-------|----------------|-------|------|-------|------|-------|---|
| 10580 | Pcdhb9         | -1.38 | 10   | 0.79  | 4    | 0.57  |   |
| 10581 | Pfkfb1         | -1.38 | 7    | 0.25  | 3    | 0.18  |   |
| 10582 | Prkag3         | -1.38 | 10   | 0.55  | 3    | 0.4   |   |
| 10583 | Prokr1         | -1.38 | 2    | 0.17  | 1    | 0.12  |   |
| 10584 | RGD1307461     | -1.38 | 3    | 0.17  | 2    | 0.12  |   |
| 10585 | RGD1562402     | -1.38 | 1    | 1.08  | 0    | 0.78  |   |
| 10586 | RGD1563045     | -1.38 | 0    | 0.62  | 1    | 0.45  |   |
| 10587 | RGD1564552     | -1.38 | 2    | 1.03  | 0    | 0.75  |   |
| 10588 | Rn60_15_0083.1 | -1.38 | 0    | 0.64  | 0    | 0.47  |   |
| 10589 | Rn60_20_0055.3 | -1.38 | 1    | 1.84  | 0    | 1.34  |   |
| 10590 | Rn60_2_0094.1  | -1.38 | 0    | 0.37  | 0    | 0.27  |   |
| 10591 | Rn60_X_0752.3  | -1.38 | 215  | 61.03 | 111  | 44.34 |   |
| 10592 | Sall4          | -1.38 | 2    | 0.16  | 1    | 0.11  |   |
| 10593 | Serinc2        | -1.38 | 4    | 0.55  | 2    | 0.4   |   |
| 10594 | Slc29a2        | -1.38 | 0    | 1.09  | 0    | 0.79  |   |
| 10595 | Slc38a6        | -1.38 | 58   | 1.29  | 28   | 0.94  |   |
| 10596 | Sncaip         | -1.38 | 23   | 0.48  | 8    | 0.35  |   |
| 10597 | snopsi28S-3327 | -1.38 | 0    | 7.27  | 0    | 5.29  |   |
| 10598 | SNORD31        | -1.38 | 4    | 14.88 | 2    | 10.81 |   |
| 10599 | Spaca5         | -1.38 | 3    | 0.9   | 5    | 0.65  |   |
| 10600 | Spock3         | -1.38 | 8    | 0.15  | 4    | 0.11  |   |
| 10601 | Srrd           | -1.38 | 37   | 8.07  | 23   | 5.86  |   |
| 10602 | Ssu72          | -1.38 | 253  | 30.73 | 154  | 22.32 |   |
| 10603 | Stab1          | -1.38 | 2    | 0.07  | 2    | 0.05  |   |
| 10604 | Susd5          | -1.38 | 5    | 0.27  | 2    | 0.19  |   |
| 10605 | Sytl2_2        | -1.38 | 0    | 0.44  | 0    | 0.32  |   |
| 10606 | Tchhl1         | -1.38 | 2    | 0.27  | 1    | 0.19  |   |
| 10607 | Tcte3          | -1.38 | 5    | 0.67  | 1    | 0.49  |   |
| 10608 | Tdrd5          | -1.38 | 5    | 0.29  | 3    | 0.21  |   |
| 10609 | Tgif2-ps1      | -1.38 | 0    | 0.7   | 0    | 0.51  |   |
| 10610 | Thbd           | -1.38 | 16   | 1.09  | 8    | 0.79  |   |
| 10611 | Tmem132b       | -1.38 | 119  | 0.18  | 67   | 0.13  |   |
| 10612 | Tmem255b       | -1.38 | 4    | 0.49  | 1    | 0.36  |   |
| 10613 | Tmem86b        | -1.38 | 3    | 0.32  | 1    | 0.23  |   |
| 10614 | Tom11i         | -1.38 | 46   | 4.59  | 38   | 3.33  |   |
| 10615 | Tram11i        | -1.38 | 2    | 0.23  | 1    | 0.17  |   |
| 10616 | Trim32         | -1.38 | 0    | 0.63  | 0    | 0.46  |   |
| 10617 | Tub            | -1.38 | 5    | 0.29  | 1    | 0.21  |   |
| 10618 | Tyro3          | -1.38 | 50   | 3.21  | 28   | 2.33  |   |
| 10619 | Upp1           | -1.38 | 5    | 0.24  | 4    | 0.18  |   |
| 10620 | Ybey           | -1.38 | 16   | 0.79  | 10   | 0.57  |   |
| 10621 | Zfp804a        | -1.38 | 4    | 0.14  | 1    | 0.1   |   |
| 10622 | Zfp93          | -1.38 | 4    | 0.24  | 3    | 0.17  |   |
| 10623 | Zkscan4        | -1.38 | 16   | 3.36  | 8    | 2.44  |   |
| 10624 | Zscan20        | -1.38 | 42   | 1.74  | 26   | 1.26  |   |
| 10625 | Zscan29        | -1.38 | 11   | 0.39  | 12   | 0.29  |   |
| 10626 | Sar1a          | -1.38 | 1040 | 58.23 | 557  | 42.27 |   |
| 10627 | Col5a1         | -1.38 | 2263 | 79.46 | 1088 | 57.65 |   |
| 10628 | Cltc           | -1.38 | 2478 | 98.86 | 1239 | 71.65 |   |
| 10629 | Pdzd8          | -1.38 | 294  | 8.78  | 149  | 6.35  |   |
| 10630 | Armcx2         | -1.38 | 670  | 50.59 | 334  | 36.59 |   |
| 10631 | Safb           | -1.38 | 274  | 17.43 | 150  | 12.61 |   |
| 10632 | Tnfaip1        | -1.38 | 847  | 52.44 | 431  | 37.91 |   |
| 10633 | Ltn1           | -1.38 | 373  | 11.69 | 193  | 8.44  |   |

Supplemental Table 2  
Vehicle versus FSH, 24 hours

|       | A              | B     | C    | D     | E   | F     | G |
|-------|----------------|-------|------|-------|-----|-------|---|
| 10634 | Polr2m_1       | -1.38 | 379  | 29.09 | 190 | 21.01 |   |
| 10635 | Fam98a         | -1.38 | 184  | 15.12 | 93  | 10.92 |   |
| 10636 | RGD1565297     | -1.39 | 308  | 71.53 | 156 | 51.63 |   |
| 10637 | Impa1          | -1.39 | 176  | 18.15 | 97  | 13.1  |   |
| 10638 | Spag7          | -1.39 | 150  | 27.48 | 84  | 19.82 |   |
| 10639 | Ppil4          | -1.39 | 167  | 11.09 | 80  | 7.99  |   |
| 10640 | Foxk2          | -1.39 | 484  | 20.98 | 272 | 15.12 |   |
| 10641 | Ss18           | -1.39 | 589  | 40.32 | 321 | 29.05 |   |
| 10642 | Sarnp          | -1.39 | 181  | 26.71 | 122 | 19.25 |   |
| 10643 | Stip1          | -1.39 | 697  | 80.41 | 370 | 57.9  |   |
| 10644 | Ppid           | -1.39 | 146  | 23.95 | 60  | 17.24 |   |
| 10645 | Nifk           | -1.39 | 110  | 17.86 | 53  | 12.85 |   |
| 10646 | Stx4           | -1.39 | 242  | 44.29 | 114 | 31.86 |   |
| 10647 | Aff4           | -1.39 | 1340 | 35.41 | 664 | 25.46 |   |
| 10648 | Mmp23          | -1.39 | 394  | 50.02 | 194 | 35.95 |   |
| 10649 | Gbe1           | -1.39 | 235  | 16.08 | 108 | 11.56 |   |
| 10650 | Pgk1           | -1.39 | 636  | 94.93 | 304 | 68.22 |   |
| 10651 | Cat            | -1.39 | 502  | 44.85 | 248 | 32.23 |   |
| 10652 | Ddx3x          | -1.39 | 1656 | 89.1  | 824 | 63.99 |   |
| 10653 | Fam111a        | -1.39 | 90   | 6.79  | 44  | 4.88  |   |
| 10654 | Xpo6           | -1.39 | 505  | 22.21 | 256 | 15.95 |   |
| 10655 | Sh3glb1        | -1.39 | 762  | 34.83 | 420 | 25.02 |   |
| 10656 | Gltscr1        | -1.39 | 195  | 7.59  | 97  | 5.45  |   |
| 10657 | Dkc1           | -1.39 | 472  | 51.88 | 262 | 37.23 |   |
| 10658 | Sp2            | -1.39 | 112  | 6.16  | 55  | 4.42  |   |
| 10659 | Nfu1           | -1.39 | 111  | 17.75 | 69  | 12.73 |   |
| 10660 | Akt1           | -1.39 | 959  | 94.39 | 472 | 67.68 |   |
| 10661 | Mlx            | -1.39 | 167  | 19.38 | 83  | 13.89 |   |
| 10662 | Kpna3          | -1.4  | 255  | 26.78 | 129 | 19.19 |   |
| 10663 | Wdr75          | -1.4  | 191  | 13.29 | 91  | 9.52  |   |
| 10664 | Entpd1         | -1.4  | 67   | 3.75  | 28  | 2.68  |   |
| 10665 | Evc2           | -1.4  | 102  | 4.36  | 59  | 3.12  |   |
| 10666 | Klhdc4_1       | -1.4  | 70   | 14.71 | 34  | 10.53 |   |
| 10667 | Serpib6        | -1.4  | 286  | 52.01 | 150 | 37.25 |   |
| 10668 | B3gnt2         | -1.4  | 295  | 23.44 | 151 | 16.78 |   |
| 10669 | Cinp           | -1.4  | 90   | 11.7  | 70  | 8.37  |   |
| 10670 | Fkbp3          | -1.4  | 169  | 29.02 | 89  | 20.78 |   |
| 10671 | Nup205         | -1.4  | 372  | 13.48 | 188 | 9.65  |   |
| 10672 | Rbms2          | -1.4  | 258  | 32.01 | 131 | 22.9  |   |
| 10673 | Scyl3          | -1.4  | 90   | 5.46  | 57  | 3.91  |   |
| 10674 | Capza2         | -1.4  | 445  | 41.98 | 213 | 30.03 |   |
| 10675 | Atp11c         | -1.4  | 79   | 4.38  | 46  | 3.13  |   |
| 10676 | Mvk            | -1.4  | 82   | 13.21 | 49  | 9.45  |   |
| 10677 | Rif1           | -1.4  | 287  | 8.66  | 152 | 6.19  |   |
| 10678 | Flot2          | -1.4  | 504  | 39.39 | 266 | 28.16 |   |
| 10679 | Ppp1r13b       | -1.4  | 212  | 12.47 | 110 | 8.91  |   |
| 10680 | AABR07043748.1 | -1.4  | 53   | 10.98 | 29  | 7.84  |   |
| 10681 | Focad          | -1.4  | 159  | 4.17  | 90  | 2.98  |   |
| 10682 | Far1           | -1.4  | 272  | 10.3  | 150 | 7.36  |   |
| 10683 | Ndufaf4        | -1.4  | 61   | 4.81  | 29  | 3.44  |   |
| 10684 | Pi4k2b         | -1.4  | 117  | 8.57  | 62  | 6.12  |   |
| 10685 | Cdk2ap1        | -1.4  | 528  | 95.93 | 251 | 68.52 |   |
| 10686 | Tmem183a       | -1.4  | 312  | 30.26 | 176 | 21.6  |   |
| 10687 | Pten           | -1.4  | 371  | 43.62 | 187 | 31.14 |   |

Supplemental Table 2  
Vehicle versus FSH, 24 hours

|       | A          | B     | C    | D      | E   | F     | G |
|-------|------------|-------|------|--------|-----|-------|---|
| 10688 | Pdcd11     | -1.4  | 551  | 18.76  | 283 | 13.39 |   |
| 10689 | Arih1      | -1.4  | 646  | 24.22  | 332 | 17.28 |   |
| 10690 | Denr       | -1.4  | 110  | 23.55  | 51  | 16.8  |   |
| 10691 | Hs3st1     | -1.4  | 219  | 15.72  | 102 | 11.21 |   |
| 10692 | LOC679894  | -1.4  | 53   | 2.56   | 26  | 1.82  |   |
| 10693 | Ube2q2     | -1.4  | 83   | 11.68  | 46  | 8.32  |   |
| 10694 | Zbtb7b     | -1.4  | 167  | 15.99  | 80  | 11.39 |   |
| 10695 | Dnaaf2     | -1.4  | 56   | 5.11   | 28  | 3.64  |   |
| 10696 | Mettl16    | -1.4  | 72   | 6.33   | 45  | 4.51  |   |
| 10697 | Sfxn3      | -1.4  | 663  | 58.96  | 323 | 41.97 |   |
| 10698 | Ddx1       | -1.4  | 567  | 53.88  | 278 | 38.35 |   |
| 10699 | Haus5      | -1.41 | 67   | 2.4    | 34  | 1.71  |   |
| 10700 | Chchd3     | -1.41 | 185  | 24.35  | 131 | 17.33 |   |
| 10701 | Tbc1d1     | -1.41 | 250  | 8.22   | 142 | 5.85  |   |
| 10702 | Lrrc42     | -1.41 | 333  | 34.8   | 180 | 24.75 |   |
| 10703 | Fam83h     | -1.41 | 98   | 4.92   | 57  | 3.5   |   |
| 10704 | Hsd3b7     | -1.41 | 109  | 13.05  | 54  | 9.28  |   |
| 10705 | RGD1565616 | -1.41 | 525  | 17.07  | 351 | 12.14 |   |
| 10706 | Epha2      | -1.41 | 857  | 50.24  | 414 | 35.72 |   |
| 10707 | Rrp9       | -1.41 | 99   | 14.39  | 54  | 10.23 |   |
| 10708 | Pfdn1      | -1.41 | 250  | 41.23  | 122 | 29.29 |   |
| 10709 | Arid4a     | -1.41 | 115  | 4.05   | 58  | 2.87  |   |
| 10710 | Hnrnpf     | -1.41 | 1120 | 125.64 | 507 | 89.21 |   |
| 10711 | Sc5d       | -1.41 | 490  | 24.57  | 238 | 17.45 |   |
| 10712 | Eif5b      | -1.41 | 91   | 21     | 56  | 14.91 |   |
| 10713 | Rpf2       | -1.41 | 58   | 8.57   | 34  | 6.08  |   |
| 10714 | Cln3       | -1.41 | 250  | 13.66  | 123 | 9.69  |   |
| 10715 | Fzd1       | -1.41 | 756  | 43.05  | 367 | 30.54 |   |
| 10716 | Tex10      | -1.41 | 159  | 8      | 85  | 5.67  |   |
| 10717 | G3bp2      | -1.41 | 376  | 44.28  | 199 | 31.4  |   |
| 10718 | Psm14      | -1.41 | 242  | 32.25  | 121 | 22.86 |   |
| 10719 | Ptprg      | -1.41 | 236  | 9.92   | 134 | 7.03  |   |
| 10720 | Calm2      | -1.41 | 361  | 83.06  | 173 | 58.86 |   |
| 10721 | Zfyve16    | -1.41 | 224  | 8.62   | 120 | 6.11  |   |
| 10722 | AC109958.1 | -1.41 | 39   | 21.3   | 19  | 15.09 |   |
| 10723 | Rock1      | -1.41 | 503  | 18.42  | 268 | 13.05 |   |
| 10724 | Ccdc58     | -1.41 | 69   | 7.99   | 40  | 5.66  |   |
| 10725 | Hsd17b12   | -1.41 | 262  | 29.06  | 128 | 20.56 |   |
| 10726 | Rbm17      | -1.41 | 161  | 25.11  | 92  | 17.77 |   |
| 10727 | Fbxw7      | -1.41 | 100  | 5.24   | 50  | 3.71  |   |
| 10728 | Dmwd       | -1.41 | 120  | 11.9   | 60  | 8.41  |   |
| 10729 | Ndufb9     | -1.41 | 187  | 65.48  | 93  | 46.29 |   |
| 10730 | Map2k1     | -1.41 | 310  | 31.95  | 158 | 22.58 |   |
| 10731 | Mgea5      | -1.41 | 668  | 30.54  | 367 | 21.58 |   |
| 10732 | Babam1     | -1.42 | 158  | 27.03  | 81  | 19.1  |   |
| 10733 | Antxr2     | -1.42 | 128  | 18.51  | 69  | 13.08 |   |
| 10734 | Arpc5l     | -1.42 | 108  | 21.49  | 74  | 15.18 |   |
| 10735 | Ryk        | -1.42 | 583  | 70.8   | 293 | 50.01 |   |
| 10736 | Spr        | -1.42 | 44   | 13.22  | 15  | 9.34  |   |
| 10737 | Mrps24     | -1.42 | 75   | 20.46  | 36  | 14.45 |   |
| 10738 | Oxct1      | -1.42 | 467  | 32.31  | 238 | 22.83 |   |
| 10739 | Spop       | -1.42 | 197  | 13.62  | 116 | 9.62  |   |
| 10740 | Larp1      | -1.42 | 674  | 47.43  | 342 | 33.5  |   |
| 10741 | Nucks1     | -1.42 | 233  | 35.9   | 117 | 25.35 |   |

Supplemental Table 2  
Vehicle versus FSH, 24 hours

|       | A              | B     | C    | D      | E   | F      | G |
|-------|----------------|-------|------|--------|-----|--------|---|
| 10742 | RGD1563348     | -1.42 | 41   | 13.33  | 24  | 9.41   |   |
| 10743 | Zfp64          | -1.42 | 155  | 10.55  | 83  | 7.44   |   |
| 10744 | Pfdn4          | -1.42 | 119  | 34.84  | 58  | 24.59  |   |
| 10745 | Aco1           | -1.42 | 909  | 60.26  | 451 | 42.53  |   |
| 10746 | Arpc3          | -1.42 | 375  | 95.58  | 179 | 67.44  |   |
| 10747 | Prpf31         | -1.42 | 109  | 10.68  | 55  | 7.53   |   |
| 10748 | Cxadr          | -1.42 | 812  | 31.49  | 374 | 22.21  |   |
| 10749 | Lrch3          | -1.42 | 54   | 7.33   | 31  | 5.17   |   |
| 10750 | Mtr            | -1.42 | 181  | 7.36   | 96  | 5.19   |   |
| 10751 | Whamm          | -1.42 | 103  | 5.95   | 50  | 4.19   |   |
| 10752 | Arhgef12       | -1.42 | 508  | 19.31  | 279 | 13.61  |   |
| 10753 | Pgrmc2         | -1.42 | 341  | 40.78  | 153 | 28.74  |   |
| 10754 | Dgcr6          | -1.42 | 49   | 5.45   | 26  | 3.84   |   |
| 10755 | Gtf2h5_1       | -1.42 | 65   | 9.94   | 32  | 7      |   |
| 10756 | Pard6b         | -1.42 | 113  | 7.49   | 53  | 5.28   |   |
| 10757 | Mtmr2          | -1.42 | 335  | 32.18  | 166 | 22.66  |   |
| 10758 | Fam104a        | -1.42 | 173  | 17.04  | 85  | 11.99  |   |
| 10759 | Atpif1         | -1.42 | 138  | 61.69  | 68  | 43.42  |   |
| 10760 | Commd6         | -1.42 | 103  | 17.54  | 56  | 12.35  |   |
| 10761 | Cops3          | -1.42 | 338  | 43.97  | 183 | 30.94  |   |
| 10762 | Sacm1l         | -1.42 | 255  | 16.25  | 154 | 11.43  |   |
| 10763 | Arf4           | -1.42 | 1100 | 155.13 | 520 | 109.09 |   |
| 10764 | Tonsl          | -1.42 | 37   | 1.82   | 17  | 1.28   |   |
| 10765 | Eif3c          | -1.42 | 1524 | 124.25 | 746 | 87.3   |   |
| 10766 | Glr3           | -1.42 | 293  | 44.14  | 152 | 31.01  |   |
| 10767 | Ppm1a          | -1.42 | 232  | 20.58  | 141 | 14.45  |   |
| 10768 | AABR07073038.1 | -1.42 | 711  | 165.18 | 341 | 115.94 |   |
| 10769 | Dhrsx          | -1.43 | 91   | 8.79   | 63  | 6.16   |   |
| 10770 | Exph5          | -1.43 | 37   | 0.76   | 22  | 0.54   |   |
| 10771 | Gng2           | -1.43 | 29   | 2.1    | 14  | 1.48   |   |
| 10772 | Fam46a         | -1.43 | 113  | 9.1    | 55  | 6.38   |   |
| 10773 | Xpot           | -1.43 | 392  | 17.96  | 198 | 12.58  |   |
| 10774 | LOC688932      | -1.43 | 2    | 7.2    | 1   | 5.04   |   |
| 10775 | Pdgfa          | -1.43 | 86   | 7.38   | 33  | 5.17   |   |
| 10776 | Mrpl19         | -1.43 | 58   | 11.94  | 27  | 8.36   |   |
| 10777 | Nudc           | -1.43 | 265  | 47.47  | 140 | 33.24  |   |
| 10778 | Arhgap1        | -1.43 | 720  | 56     | 347 | 39.19  |   |
| 10779 | AABR07058267.1 | -1.43 | 27   | 14.37  | 13  | 10.06  |   |
| 10780 | Rpp38          | -1.43 | 37   | 5.64   | 17  | 3.95   |   |
| 10781 | Slc22a15       | -1.43 | 40   | 1.99   | 22  | 1.39   |   |
| 10782 | Zfyve19        | -1.43 | 76   | 8.61   | 38  | 6.02   |   |
| 10783 | Btbd19         | -1.43 | 35   | 2.21   | 18  | 1.55   |   |
| 10784 | Gart           | -1.43 | 297  | 19.82  | 148 | 13.86  |   |
| 10785 | Vps26b         | -1.43 | 491  | 31.7   | 227 | 22.17  |   |
| 10786 | Apc            | -1.43 | 432  | 11.31  | 214 | 7.91   |   |
| 10787 | Tmem254        | -1.43 | 85   | 14.25  | 41  | 9.96   |   |
| 10788 | Wibg           | -1.43 | 114  | 16.91  | 74  | 11.82  |   |
| 10789 | Gnl2           | -1.43 | 233  | 11.05  | 107 | 7.72   |   |
| 10790 | Fam20c         | -1.43 | 288  | 19.74  | 140 | 13.79  |   |
| 10791 | Tpbg           | -1.43 | 578  | 60.19  | 272 | 42.05  |   |
| 10792 | Xrcc5          | -1.43 | 74   | 5.05   | 43  | 3.53   |   |
| 10793 | Dcun1d5        | -1.43 | 131  | 15.91  | 77  | 11.11  |   |
| 10794 | Rpl26          | -1.43 | 170  | 170.71 | 182 | 119.17 |   |
| 10795 | Akirin1        | -1.43 | 182  | 16.01  | 91  | 11.17  |   |



Supplemental Table 2  
Vehicle versus FSH, 24 hours

|       | A            | B     | C    | D      | E   | F      | G |
|-------|--------------|-------|------|--------|-----|--------|---|
| 10796 | Dnaja2       | -1.43 | 367  | 44.33  | 178 | 30.93  |   |
| 10797 | Naa15        | -1.43 | 458  | 16.64  | 242 | 11.61  |   |
| 10798 | Fam118a      | -1.43 | 73   | 4.33   | 34  | 3.02   |   |
| 10799 | Rps6         | -1.43 | 0    | 16.75  | 0   | 11.68  |   |
| 10800 | AC126537.1   | -1.43 | 15   | 3.74   | 9   | 2.61   |   |
| 10801 | LOC100911840 | -1.43 | 2    | 6.14   | 2   | 4.28   |   |
| 10802 | Psmc3ip      | -1.43 | 29   | 6.83   | 14  | 4.76   |   |
| 10803 | RGD1310335   | -1.43 | 31   | 2.28   | 13  | 1.59   |   |
| 10804 | Cyp20a1      | -1.43 | 169  | 15.45  | 83  | 10.77  |   |
| 10805 | Brsk1        | -1.44 | 124  | 9.33   | 64  | 6.5    |   |
| 10806 | Fam65a       | -1.44 | 396  | 13.01  | 214 | 9.05   |   |
| 10807 | Pacsin3      | -1.44 | 83   | 9.8    | 39  | 6.82   |   |
| 10808 | Plcb4        | -1.44 | 396  | 11.88  | 227 | 8.26   |   |
| 10809 | Tab2         | -1.44 | 633  | 31.54  | 309 | 21.93  |   |
| 10810 | Eif4a2       | -1.44 | 1184 | 103.79 | 557 | 72.13  |   |
| 10811 | Ccdc34       | -1.44 | 30   | 2.27   | 16  | 1.57   |   |
| 10812 | Mcm2c2       | -1.44 | 62   | 2.24   | 52  | 1.55   |   |
| 10813 | Mdn1         | -1.44 | 510  | 5.96   | 248 | 4.14   |   |
| 10814 | Slc18a2      | -1.44 | 43   | 1.97   | 20  | 1.37   |   |
| 10815 | Gnb1         | -1.44 | 1212 | 198.71 | 550 | 138.02 |   |
| 10816 | Ndufa8       | -1.44 | 163  | 39.03  | 84  | 27.11  |   |
| 10817 | Hn1l         | -1.44 | 358  | 30.48  | 176 | 21.17  |   |
| 10818 | Kif2a        | -1.44 | 352  | 31.62  | 189 | 21.94  |   |
| 10819 | Gfm1         | -1.44 | 135  | 10.8   | 61  | 7.5    |   |
| 10820 | Tulp4        | -1.44 | 752  | 29.62  | 431 | 20.55  |   |
| 10821 | Tpr          | -1.44 | 818  | 26.28  | 390 | 18.23  |   |
| 10822 | Dnajc27      | -1.44 | 48   | 2.26   | 25  | 1.56   |   |
| 10823 | Trim44       | -1.44 | 53   | 7.89   | 40  | 5.47   |   |
| 10824 | Dock4        | -1.44 | 408  | 11.06  | 216 | 7.67   |   |
| 10825 | Pafah1b3     | -1.44 | 113  | 25.87  | 52  | 17.93  |   |
| 10826 | Smc2         | -1.44 | 238  | 10.11  | 115 | 7.01   |   |
| 10827 | Rps8         | -1.44 | 205  | 440.69 | 165 | 305.37 |   |
| 10828 | Uqcrb        | -1.44 | 62   | 20.82  | 31  | 14.43  |   |
| 10829 | Ptp4a2       | -1.44 | 441  | 86.41  | 209 | 59.86  |   |
| 10830 | RGD1305178   | -1.44 | 131  | 14.54  | 64  | 10.07  |   |
| 10831 | Mex3d        | -1.44 | 253  | 22.59  | 117 | 15.65  |   |
| 10832 | Ndufs5       | -1.45 | 61   | 40.17  | 37  | 27.8   |   |
| 10833 | Exosc8       | -1.45 | 35   | 2.87   | 23  | 1.99   |   |
| 10834 | Hccs         | -1.45 | 88   | 8.73   | 40  | 6.04   |   |
| 10835 | LOC102553119 | -1.45 | 51   | 3.07   | 25  | 2.13   |   |
| 10836 | Ophn1        | -1.45 | 319  | 12.91  | 184 | 8.93   |   |
| 10837 | Pter         | -1.45 | 41   | 2.52   | 25  | 1.74   |   |
| 10838 | Reep1        | -1.45 | 28   | 1.42   | 17  | 0.98   |   |
| 10839 | Tamm41       | -1.45 | 71   | 8.79   | 48  | 6.09   |   |
| 10840 | Gpkow        | -1.45 | 204  | 11.54  | 96  | 7.98   |   |
| 10841 | Lix1l        | -1.45 | 326  | 20.23  | 153 | 13.98  |   |
| 10842 | Pwp2         | -1.45 | 193  | 11.81  | 92  | 8.16   |   |
| 10843 | Sept2        | -1.45 | 1190 | 110.18 | 595 | 76.14  |   |
| 10844 | Gas2l1       | -1.45 | 116  | 9.24   | 53  | 6.38   |   |
| 10845 | Rrp7a        | -1.45 | 23   | 5.54   | 8   | 3.82   |   |
| 10846 | Ergic1       | -1.45 | 950  | 73.26  | 428 | 50.58  |   |
| 10847 | Nop2         | -1.45 | 116  | 17.19  | 58  | 11.87  |   |
| 10848 | Polr3g       | -1.45 | 55   | 2.99   | 28  | 2.06   |   |
| 10849 | Pus3         | -1.45 | 41   | 5.91   | 20  | 4.08   |   |

Supplemental Table 2  
Vehicle versus FSH, 24 hours

|       | A              | B     | C    | D      | E    | F      | G |
|-------|----------------|-------|------|--------|------|--------|---|
| 10850 | Calu           | -1.45 | 2725 | 191.08 | 1283 | 131.87 |   |
| 10851 | Prpf3          | -1.45 | 237  | 18.58  | 124  | 12.82  |   |
| 10852 | Pafah1b2       | -1.45 | 424  | 49.86  | 208  | 34.38  |   |
| 10853 | Arfp2          | -1.45 | 172  | 21.91  | 95   | 15.1   |   |
| 10854 | Btf3           | -1.45 | 280  | 198.72 | 140  | 136.98 |   |
| 10855 | Qk             | -1.45 | 706  | 34.84  | 434  | 24     |   |
| 10856 | Fam195b        | -1.45 | 171  | 37.58  | 86   | 25.88  |   |
| 10857 | Ccm2           | -1.45 | 324  | 28.81  | 167  | 19.84  |   |
| 10858 | Aldh1a7        | -1.45 | 12   | 3.16   | 9    | 2.17   |   |
| 10859 | Mrps10         | -1.45 | 40   | 7.69   | 18   | 5.29   |   |
| 10860 | RT1-N3         | -1.45 | 16   | 2.62   | 9    | 1.8    |   |
| 10861 | Utp23          | -1.45 | 45   | 8.4    | 19   | 5.78   |   |
| 10862 | RGD1308139     | -1.45 | 45   | 6.58   | 29   | 4.53   |   |
| 10863 | Ddx21          | -1.45 | 385  | 35.55  | 198  | 24.47  |   |
| 10864 | Preli1         | -1.45 | 275  | 92.71  | 111  | 63.79  |   |
| 10865 | Ddx27          | -1.45 | 193  | 15.68  | 102  | 10.79  |   |
| 10866 | Smc4           | -1.45 | 206  | 9.93   | 90   | 6.83   |   |
| 10867 | Txndc9         | -1.45 | 166  | 26.28  | 80   | 18.07  |   |
| 10868 | Emc10          | -1.45 | 345  | 51.52  | 166  | 35.43  |   |
| 10869 | Spag9          | -1.46 | 1234 | 34.33  | 615  | 23.59  |   |
| 10870 | AABR07043421.1 | -1.46 | 11   | 4.94   | 5    | 3.39   |   |
| 10871 | Ubxn8          | -1.46 | 87   | 3.9    | 32   | 2.68   |   |
| 10872 | Mrpl40         | -1.46 | 60   | 5.71   | 28   | 3.92   |   |
| 10873 | Ino80          | -1.46 | 289  | 10.71  | 146  | 7.35   |   |
| 10874 | Ptpn9          | -1.46 | 486  | 28.53  | 249  | 19.58  |   |
| 10875 | Zscan22        | -1.46 | 37   | 6.03   | 18   | 4.14   |   |
| 10876 | Nrde2          | -1.46 | 81   | 5.03   | 48   | 3.45   |   |
| 10877 | Vti1a          | -1.46 | 121  | 3.29   | 75   | 2.26   |   |
| 10878 | Fryl           | -1.46 | 907  | 18.94  | 471  | 12.99  |   |
| 10879 | Zswim6         | -1.46 | 197  | 16.56  | 90   | 11.36  |   |
| 10880 | Cox5b          | -1.46 | 284  | 155.99 | 118  | 106.97 |   |
| 10881 | Kihl2          | -1.46 | 142  | 7.33   | 71   | 5.03   |   |
| 10882 | Mfsd6          | -1.46 | 103  | 4.46   | 51   | 3.06   |   |
| 10883 | LOC100911516   | -1.46 | 0    | 19.31  | 0    | 13.23  |   |
| 10884 | Anapc13        | -1.46 | 14   | 21.44  | 10   | 14.69  |   |
| 10885 | Nmnat1         | -1.46 | 71   | 6.28   | 42   | 4.3    |   |
| 10886 | Vcan           | -1.46 | 2737 | 55.3   | 1277 | 37.89  |   |
| 10887 | Fbxo30         | -1.46 | 167  | 12.2   | 78   | 8.36   |   |
| 10888 | Mtmt4          | -1.46 | 558  | 23.03  | 264  | 15.77  |   |
| 10889 | Nr3c1_1        | -1.46 | 276  | 13.64  | 131  | 9.34   |   |
| 10890 | Rabggtb        | -1.46 | 342  | 35.89  | 153  | 24.57  |   |
| 10891 | Cbl            | -1.46 | 169  | 11.3   | 91   | 7.73   |   |
| 10892 | Nup62          | -1.46 | 425  | 38.05  | 200  | 26.04  |   |
| 10893 | Osbpl8         | -1.46 | 385  | 12.38  | 188  | 8.47   |   |
| 10894 | Fam206a        | -1.46 | 19   | 4.35   | 9    | 2.98   |   |
| 10895 | Birc5          | -1.46 | 27   | 4.85   | 16   | 3.32   |   |
| 10896 | Dnajc1         | -1.46 | 106  | 6.8    | 68   | 4.65   |   |
| 10897 | Fam204a        | -1.46 | 39   | 4.01   | 20   | 2.74   |   |
| 10898 | Fgfr1op2       | -1.46 | 197  | 11.6   | 92   | 7.93   |   |
| 10899 | Flt4           | -1.46 | 19   | 0.74   | 8    | 0.51   |   |
| 10900 | Mss51          | -1.46 | 62   | 2.67   | 35   | 1.82   |   |
| 10901 | Slc25a27       | -1.46 | 27   | 1.08   | 14   | 0.74   |   |
| 10902 | Tspan18        | -1.46 | 27   | 1.14   | 16   | 0.78   |   |
| 10903 | Tpi1           | -1.46 | 7    | 192.74 | 7    | 131.64 |   |

Supplemental Table 2  
Vehicle versus FSH, 24 hours

|       | A              | B     | C    | D      | E   | F      | G |
|-------|----------------|-------|------|--------|-----|--------|---|
| 10904 | St6galnac3     | -1.46 | 286  | 7.08   | 102 | 4.83   |   |
| 10905 | Srsf2          | -1.46 | 902  | 89     | 416 | 60.76  |   |
| 10906 | lws1           | -1.47 | 192  | 13.91  | 118 | 9.49   |   |
| 10907 | U2af2          | -1.47 | 553  | 69.46  | 316 | 47.38  |   |
| 10908 | Zdhhc9         | -1.47 | 106  | 8.27   | 49  | 5.64   |   |
| 10909 | Hars2          | -1.47 | 119  | 7.19   | 67  | 4.9    |   |
| 10910 | LOC100911515   | -1.47 | 2    | 57.32  | 2   | 39.09  |   |
| 10911 | Btg3           | -1.47 | 169  | 24.5   | 74  | 16.71  |   |
| 10912 | Zc3h7a         | -1.47 | 414  | 16.39  | 195 | 11.17  |   |
| 10913 | Heatr5a        | -1.47 | 595  | 16.26  | 284 | 11.08  |   |
| 10914 | Hgs            | -1.47 | 597  | 38.95  | 287 | 26.56  |   |
| 10915 | Gemin7         | -1.47 | 41   | 7.73   | 19  | 5.27   |   |
| 10916 | Slirp          | -1.47 | 34   | 2.83   | 21  | 1.93   |   |
| 10917 | Ap3s1          | -1.47 | 98   | 12.41  | 47  | 8.45   |   |
| 10918 | Bid            | -1.47 | 52   | 4      | 24  | 2.73   |   |
| 10919 | Hspa8          | -1.47 | 0    | 3.81   | 0   | 2.59   |   |
| 10920 | Wrnip1         | -1.47 | 128  | 10.6   | 57  | 7.21   |   |
| 10921 | Chd1           | -1.47 | 341  | 13.11  | 164 | 8.93   |   |
| 10922 | Midn           | -1.47 | 795  | 56.16  | 366 | 38.21  |   |
| 10923 | Sec24d         | -1.47 | 637  | 40.17  | 302 | 27.33  |   |
| 10924 | Ckap2          | -1.47 | 48   | 4.59   | 29  | 3.12   |   |
| 10925 | Smarcd3        | -1.47 | 374  | 42     | 205 | 28.57  |   |
| 10926 | Smim1          | -1.47 | 92   | 25.85  | 41  | 17.58  |   |
| 10927 | Ttc33          | -1.47 | 58   | 6.54   | 32  | 4.45   |   |
| 10928 | Ykt6           | -1.47 | 180  | 32.03  | 82  | 21.78  |   |
| 10929 | Calm1          | -1.47 | 1544 | 260.17 | 722 | 176.91 |   |
| 10930 | Cd3eap         | -1.47 | 60   | 7.57   | 29  | 5.15   |   |
| 10931 | Rbm8a          | -1.47 | 189  | 31.19  | 88  | 21.2   |   |
| 10932 | Zfp276         | -1.47 | 94   | 6.1    | 44  | 4.14   |   |
| 10933 | Sestd1         | -1.47 | 260  | 19.98  | 144 | 13.57  |   |
| 10934 | LOC683884      | -1.47 | 129  | 7.49   | 70  | 5.09   |   |
| 10935 | Ube2i          | -1.47 | 225  | 120.67 | 94  | 81.98  |   |
| 10936 | Agtppb1        | -1.47 | 132  | 4.99   | 78  | 3.39   |   |
| 10937 | Ubfd1          | -1.47 | 116  | 7.58   | 53  | 5.15   |   |
| 10938 | Gsn            | -1.47 | 398  | 34.37  | 182 | 23.34  |   |
| 10939 | LOC499235      | -1.47 | 273  | 23.8   | 137 | 16.16  |   |
| 10940 | Upf3a          | -1.47 | 156  | 16.93  | 70  | 11.49  |   |
| 10941 | Camk2d         | -1.47 | 541  | 24.47  | 270 | 16.61  |   |
| 10942 | AABR07019086.1 | -1.47 | 14   | 0.91   | 11  | 0.62   |   |
| 10943 | AABR07021996.1 | -1.47 | 33   | 2.06   | 14  | 1.4    |   |
| 10944 | Asxl3          | -1.47 | 19   | 0.56   | 14  | 0.38   |   |
| 10945 | Daam2          | -1.47 | 22   | 1.11   | 12  | 0.76   |   |
| 10946 | Hmgcll1        | -1.47 | 44   | 0.97   | 24  | 0.65   |   |
| 10947 | LOC100361103_2 | -1.47 | 119  | 170.24 | 60  | 115.44 |   |
| 10948 | Lsm2           | -1.47 | 12   | 3.95   | 4   | 2.68   |   |
| 10949 | Mtrf1l         | -1.47 | 27   | 3.06   | 24  | 2.07   |   |
| 10950 | Rbm25          | -1.47 | 26   | 15.77  | 20  | 10.69  |   |
| 10951 | Steap2         | -1.47 | 86   | 5.37   | 42  | 3.64   |   |
| 10952 | Tbrg4          | -1.47 | 183  | 16.19  | 82  | 10.98  |   |
| 10953 | Timp3          | -1.47 | 22   | 4.28   | 11  | 2.9    |   |
| 10954 | Preli2         | -1.47 | 62   | 2.39   | 31  | 1.62   |   |
| 10955 | Clock          | -1.48 | 287  | 7.09   | 139 | 4.81   |   |
| 10956 | Fam3c          | -1.48 | 277  | 26.27  | 127 | 17.8   |   |
| 10957 | Usp6nl         | -1.48 | 655  | 24.67  | 307 | 16.72  |   |

Supplemental Table 2  
Vehicle versus FSH, 24 hours

|       | A              | B     | C    | D      | E    | F      | G |
|-------|----------------|-------|------|--------|------|--------|---|
| 10958 | Sri            | -1.48 | 176  | 47.95  | 86   | 32.49  |   |
| 10959 | Fasn           | -1.48 | 2981 | 80.57  | 1375 | 54.55  |   |
| 10960 | Zswim4         | -1.48 | 194  | 7.91   | 79   | 5.35   |   |
| 10961 | Synpo          | -1.48 | 558  | 35.14  | 265  | 23.76  |   |
| 10962 | Cdca2          | -1.48 | 53   | 2.94   | 26   | 1.99   |   |
| 10963 | Cdk1           | -1.48 | 186  | 30.37  | 88   | 20.53  |   |
| 10964 | Serpinb9       | -1.48 | 490  | 67.73  | 243  | 45.76  |   |
| 10965 | Smad1          | -1.48 | 240  | 13.12  | 101  | 8.87   |   |
| 10966 | Gid8           | -1.48 | 235  | 39.7   | 107  | 26.82  |   |
| 10967 | Hipk2          | -1.48 | 398  | 15.36  | 187  | 10.37  |   |
| 10968 | Rpl35          | -1.48 | 380  | 262.02 | 184  | 176.98 |   |
| 10969 | Cep95          | -1.48 | 119  | 5.99   | 61   | 4.05   |   |
| 10970 | Naca           | -1.48 | 942  | 33.74  | 440  | 22.79  |   |
| 10971 | Sprtn          | -1.48 | 81   | 9.06   | 38   | 6.12   |   |
| 10972 | Vat1           | -1.48 | 1303 | 113.75 | 590  | 76.82  |   |
| 10973 | Tbc1d8b        | -1.48 | 191  | 7.43   | 88   | 5.02   |   |
| 10974 | AABR07042359.1 | -1.48 | 12   | 308.3  | 13   | 208.15 |   |
| 10975 | Ddx18          | -1.48 | 173  | 17.98  | 78   | 12.14  |   |
| 10976 | Wdr43          | -1.48 | 248  | 15.32  | 124  | 10.34  |   |
| 10977 | LOC100360573_2 | -1.48 | 10   | 34.97  | 5    | 23.59  |   |
| 10978 | Snrpf          | -1.48 | 34   | 8.22   | 14   | 5.54   |   |
| 10979 | Cfap20         | -1.48 | 116  | 17.74  | 49   | 11.97  |   |
| 10980 | Cyb561d2       | -1.48 | 30   | 4.74   | 14   | 3.2    |   |
| 10981 | Cyb5r3         | -1.48 | 400  | 50.58  | 185  | 34.13  |   |
| 10982 | Ncl            | -1.48 | 393  | 78.17  | 235  | 52.73  |   |
| 10983 | Anxa4          | -1.48 | 269  | 29.25  | 129  | 19.73  |   |
| 10984 | Mtss1l         | -1.48 | 224  | 13.08  | 96   | 8.82   |   |
| 10985 | Stard3nl       | -1.48 | 136  | 18.82  | 69   | 12.69  |   |
| 10986 | Chaf1a         | -1.48 | 107  | 8.02   | 60   | 5.4    |   |
| 10987 | Arpc5          | -1.48 | 429  | 60.46  | 201  | 40.75  |   |
| 10988 | Rc3h1          | -1.48 | 375  | 12.47  | 195  | 8.4    |   |
| 10989 | Tma16          | -1.49 | 55   | 3      | 25   | 2.02   |   |
| 10990 | Cenpc          | -1.49 | 112  | 5.89   | 46   | 3.97   |   |
| 10991 | LOC100362620   | -1.49 | 50   | 16.61  | 18   | 11.19  |   |
| 10992 | Col4a4         | -1.49 | 1844 | 37.94  | 829  | 25.54  |   |
| 10993 | Cdk7           | -1.49 | 135  | 17.29  | 82   | 11.64  |   |
| 10994 | Camsap1        | -1.49 | 493  | 15.89  | 256  | 10.69  |   |
| 10995 | Scand1         | -1.49 | 64   | 17.57  | 33   | 11.82  |   |
| 10996 | Thg1l          | -1.49 | 65   | 5.78   | 33   | 3.89   |   |
| 10997 | Ddx31          | -1.49 | 122  | 3.24   | 52   | 2.18   |   |
| 10998 | Hic2           | -1.49 | 61   | 2.98   | 28   | 2      |   |
| 10999 | Myo5a          | -1.49 | 157  | 6.27   | 82   | 4.21   |   |
| 11000 | Phf20          | -1.49 | 231  | 15.28  | 118  | 10.27  |   |
| 11001 | Rn60_1_2787.1  | -1.49 | 62   | 6.45   | 33   | 4.33   |   |
| 11002 | Smarca2        | -1.49 | 540  | 15.81  | 268  | 10.62  |   |
| 11003 | Bdp1           | -1.49 | 294  | 7.72   | 141  | 5.18   |   |
| 11004 | Sh3tc1         | -1.49 | 175  | 7.68   | 76   | 5.16   |   |
| 11005 | Kpna4          | -1.49 | 363  | 43.88  | 181  | 29.45  |   |
| 11006 | Chrdl1         | -1.49 | 1350 | 35.86  | 619  | 24.07  |   |
| 11007 | Npap60_2       | -1.49 | 209  | 17.32  | 95   | 11.63  |   |
| 11008 | Bcorl1         | -1.49 | 235  | 8.12   | 115  | 5.45   |   |
| 11009 | Lzts2          | -1.49 | 420  | 35.5   | 194  | 23.82  |   |
| 11010 | Ccdc163        | -1.49 | 20   | 2.04   | 14   | 1.37   |   |
| 11011 | Hirip3         | -1.49 | 94   | 10.33  | 46   | 6.93   |   |

Supplemental Table 2  
Vehicle versus FSH, 24 hours

|       | A              | B     | C    | D      | E    | F      | G |
|-------|----------------|-------|------|--------|------|--------|---|
| 11012 | Rnf4           | -1.49 | 244  | 51.85  | 122  | 34.78  |   |
| 11013 | Taf5           | -1.49 | 48   | 3      | 24   | 2.01   |   |
| 11014 | AABR07073045.1 | -1.49 | 0    | 6.95   | 0    | 4.66   |   |
| 11015 | Ano1           | -1.49 | 372  | 15.95  | 171  | 10.7   |   |
| 11016 | Emc2           | -1.49 | 35   | 7.27   | 33   | 4.88   |   |
| 11017 | Fancg          | -1.49 | 16   | 1.73   | 9    | 1.16   |   |
| 11018 | Fdx1l          | -1.49 | 81   | 21.01  | 40   | 14.09  |   |
| 11019 | LOC100910646   | -1.49 | 0    | 1.47   | 0    | 0.98   |   |
| 11020 | Nt5dc3         | -1.49 | 60   | 5.03   | 27   | 3.38   |   |
| 11021 | Slc43a1        | -1.49 | 58   | 5.34   | 26   | 3.58   |   |
| 11022 | Taf4a          | -1.49 | 146  | 10.19  | 76   | 6.83   |   |
| 11023 | Arf1           | -1.49 | 952  | 256.67 | 447  | 171.95 |   |
| 11024 | Ptbp1          | -1.49 | 681  | 164.13 | 320  | 109.93 |   |
| 11025 | Zbtb1          | -1.49 | 192  | 11.16  | 122  | 7.47   |   |
| 11026 | Nsun2          | -1.49 | 342  | 16.13  | 156  | 10.79  |   |
| 11027 | Sft2d1         | -1.49 | 192  | 30.99  | 101  | 20.73  |   |
| 11028 | Map9           | -1.5  | 123  | 4.53   | 55   | 3.03   |   |
| 11029 | Spry2          | -1.5  | 114  | 15.56  | 55   | 10.4   |   |
| 11030 | Ammecr1l       | -1.5  | 438  | 21.95  | 197  | 14.68  |   |
| 11031 | Cmpk1          | -1.5  | 209  | 25.43  | 109  | 17     |   |
| 11032 | Lsm6           | -1.5  | 30   | 5.88   | 15   | 3.93   |   |
| 11033 | Socs6          | -1.5  | 116  | 8.46   | 56   | 5.66   |   |
| 11034 | U2surp         | -1.5  | 261  | 17.01  | 138  | 11.37  |   |
| 11035 | Gipc1          | -1.5  | 309  | 33.98  | 149  | 22.68  |   |
| 11036 | LOC100233176   | -1.5  | 106  | 14.17  | 59   | 9.46   |   |
| 11037 | Uba5           | -1.5  | 244  | 15.58  | 116  | 10.4   |   |
| 11038 | Sptan1         | -1.5  | 3128 | 92.72  | 1455 | 61.89  |   |
| 11039 | Ssh1           | -1.5  | 207  | 9.67   | 127  | 6.46   |   |
| 11040 | LOC100910447   | -1.5  | 284  | 65.3   | 136  | 43.58  |   |
| 11041 | Ddx39a         | -1.5  | 261  | 24.07  | 131  | 16.06  |   |
| 11042 | Kif11          | -1.5  | 105  | 5.16   | 53   | 3.44   |   |
| 11043 | Bag1           | -1.5  | 234  | 34.86  | 117  | 23.25  |   |
| 11044 | Prdx5          | -1.5  | 86   | 25.95  | 40   | 17.3   |   |
| 11045 | LOC100911822   | -1.5  | 4    | 6.73   | 4    | 4.48   |   |
| 11046 | Serpib6b       | -1.5  | 25   | 5.29   | 11   | 3.52   |   |
| 11047 | Tardbp         | -1.5  | 707  | 54.65  | 299  | 36.37  |   |
| 11048 | Marveld1       | -1.5  | 377  | 33.17  | 174  | 22.07  |   |
| 11049 | Uhmk1          | -1.5  | 179  | 19.13  | 73   | 12.73  |   |
| 11050 | Ncbp2_1        | -1.5  | 154  | 33.47  | 68   | 22.25  |   |
| 11051 | Pkd1           | -1.5  | 1811 | 30.88  | 827  | 20.52  |   |
| 11052 | Agl            | -1.51 | 186  | 5.76   | 87   | 3.83   |   |
| 11053 | Nop56          | -1.51 | 331  | 36.6   | 145  | 24.32  |   |
| 11054 | Zfp334         | -1.51 | 35   | 4.27   | 16   | 2.84   |   |
| 11055 | Psm6           | -1.51 | 267  | 59.43  | 128  | 39.44  |   |
| 11056 | Naa10          | -1.51 | 64   | 12.22  | 32   | 8.11   |   |
| 11057 | Capzb          | -1.51 | 680  | 81.65  | 334  | 54.16  |   |
| 11058 | Ddx54          | -1.51 | 278  | 20.99  | 130  | 13.92  |   |
| 11059 | Ccdc88c        | -1.51 | 90   | 1.56   | 46   | 1.04   |   |
| 11060 | Hmox2          | -1.51 | 164  | 14.6   | 88   | 9.68   |   |
| 11061 | Emp2           | -1.51 | 164  | 12.58  | 77   | 8.33   |   |
| 11062 | Smg1           | -1.51 | 982  | 19.92  | 464  | 13.18  |   |
| 11063 | C2cd2          | -1.51 | 159  | 5.78   | 72   | 3.83   |   |
| 11064 | Ybx3           | -1.51 | 613  | 73.36  | 292  | 48.57  |   |
| 11065 | Cct8           | -1.51 | 693  | 64.44  | 317  | 42.66  |   |

Supplemental Table 2  
Vehicle versus FSH, 24 hours

|       | A              | B     | C    | D      | E    | F      | G |
|-------|----------------|-------|------|--------|------|--------|---|
| 11066 | Dennd4a        | -1.51 | 123  | 2.97   | 64   | 1.97   |   |
| 11067 | Pitpnm2        | -1.51 | 145  | 3.89   | 66   | 2.57   |   |
| 11068 | Adal           | -1.51 | 11   | 1.71   | 7    | 1.13   |   |
| 11069 | Aebp2          | -1.51 | 293  | 12.96  | 168  | 8.56   |   |
| 11070 | Chchd7         | -1.51 | 14   | 10.62  | 5    | 7.02   |   |
| 11071 | Depdc1         | -1.51 | 29   | 1.66   | 10   | 1.1    |   |
| 11072 | Eef1d          | -1.51 | 396  | 44.84  | 184  | 29.62  |   |
| 11073 | Eva1b          | -1.51 | 11   | 2.54   | 5    | 1.68   |   |
| 11074 | Katnbl1        | -1.51 | 44   | 5.01   | 31   | 3.31   |   |
| 11075 | Rnmtl1         | -1.51 | 25   | 3.72   | 11   | 2.46   |   |
| 11076 | Adamts4        | -1.51 | 11   | 0.49   | 5    | 0.32   |   |
| 11077 | Baiap2l1       | -1.51 | 257  | 14.48  | 102  | 9.57   |   |
| 11078 | Ccser2         | -1.51 | 122  | 5.59   | 70   | 3.69   |   |
| 11079 | Dph6           | -1.51 | 26   | 3.4    | 23   | 2.24   |   |
| 11080 | LOC100361993   | -1.51 | 31   | 14.48  | 15   | 9.57   |   |
| 11081 | Nupl2          | -1.51 | 81   | 3.38   | 40   | 2.23   |   |
| 11082 | RGD1565131     | -1.51 | 5    | 4.41   | 2    | 2.92   |   |
| 11083 | RGD1566099     | -1.51 | 20   | 3.25   | 7    | 2.15   |   |
| 11084 | Ripk3          | -1.51 | 14   | 1.37   | 9    | 0.9    |   |
| 11085 | Sec61b         | -1.51 | 187  | 78.03  | 89   | 51.54  |   |
| 11086 | Sh3bgr         | -1.51 | 10   | 2.39   | 4    | 1.58   |   |
| 11087 | Zfp597         | -1.51 | 23   | 4.35   | 11   | 2.87   |   |
| 11088 | AABR07055834.1 | -1.51 | 11   | 1.45   | 6    | 0.96   |   |
| 11089 | Eif1           | -1.51 | 877  | 228.34 | 434  | 150.78 |   |
| 11090 | Pamr1          | -1.51 | 548  | 40.77  | 242  | 26.92  |   |
| 11091 | Atp5d          | -1.51 | 339  | 34.22  | 154  | 22.59  |   |
| 11092 | LOC100362366   | -1.52 | 31   | 141.61 | 21   | 93.46  |   |
| 11093 | Nktr           | -1.52 | 697  | 23.91  | 322  | 15.78  |   |
| 11094 | Gga3           | -1.52 | 219  | 10.23  | 109  | 6.75   |   |
| 11095 | Atp1b1         | -1.52 | 786  | 69.21  | 360  | 45.67  |   |
| 11096 | Rpl23          | -1.52 | 729  | 311.68 | 326  | 205.52 |   |
| 11097 | Kdelr3         | -1.52 | 126  | 22.58  | 54   | 14.88  |   |
| 11098 | Arhgap17       | -1.52 | 620  | 30.6   | 306  | 20.16  |   |
| 11099 | Rpl24          | -1.52 | 1137 | 576.65 | 517  | 379.85 |   |
| 11100 | Golga4         | -1.52 | 752  | 20.45  | 330  | 13.47  |   |
| 11101 | Gnl3           | -1.52 | 217  | 20.4   | 86   | 13.42  |   |
| 11102 | Slc25a24       | -1.52 | 247  | 14.9   | 116  | 9.81   |   |
| 11103 | Klc1           | -1.52 | 406  | 26.89  | 194  | 17.68  |   |
| 11104 | Uspl1          | -1.52 | 170  | 9.22   | 79   | 6.07   |   |
| 11105 | Slco3a1        | -1.52 | 2538 | 96.27  | 1034 | 63.3   |   |
| 11106 | Atxn2l         | -1.52 | 921  | 51.02  | 411  | 33.54  |   |
| 11107 | Arl2           | -1.52 | 524  | 11.42  | 793  | 7.51   |   |
| 11108 | Dnajb5         | -1.52 | 96   | 6.8    | 41   | 4.47   |   |
| 11109 | Vars           | -1.52 | 587  | 34.8   | 267  | 22.88  |   |
| 11110 | Fam160a2       | -1.52 | 215  | 7.17   | 108  | 4.71   |   |
| 11111 | Txn1           | -1.52 | 452  | 66.62  | 200  | 43.75  |   |
| 11112 | Mdh2           | -1.52 | 799  | 147.16 | 360  | 96.62  |   |
| 11113 | Ndufa11        | -1.52 | 233  | 98.46  | 105  | 64.63  |   |
| 11114 | Shoc2          | -1.52 | 302  | 22.47  | 144  | 14.75  |   |
| 11115 | Abcc5          | -1.52 | 119  | 6.5    | 60   | 4.27   |   |
| 11116 | Crif3          | -1.52 | 90   | 12.84  | 48   | 8.43   |   |
| 11117 | Ly9            | -1.52 | 51   | 3.92   | 18   | 2.58   |   |
| 11118 | Pmm1           | -1.52 | 78   | 12.92  | 35   | 8.48   |   |
| 11119 | Wdr54          | -1.52 | 7    | 1.77   | 5    | 1.16   |   |

Supplemental Table 2  
Vehicle versus FSH, 24 hours

|       | A         | B     | C    | D      | E   | F      | G |
|-------|-----------|-------|------|--------|-----|--------|---|
| 11120 | Cdc42se1  | -1.52 | 344  | 30.85  | 157 | 20.24  |   |
| 11121 | Eri1      | -1.52 | 149  | 12.5   | 72  | 8.2    |   |
| 11122 | Dtnb      | -1.52 | 234  | 8.11   | 92  | 5.32   |   |
| 11123 | Ralb      | -1.52 | 116  | 13.67  | 55  | 8.97   |   |
| 11124 | Pmpcb     | -1.52 | 499  | 74.86  | 237 | 49.09  |   |
| 11125 | Kctd3     | -1.53 | 373  | 21.42  | 175 | 14.04  |   |
| 11126 | Ola1      | -1.53 | 219  | 27.22  | 107 | 17.85  |   |
| 11127 | Ccdc50    | -1.53 | 220  | 25.94  | 112 | 16.99  |   |
| 11128 | Fam162a   | -1.53 | 123  | 11.35  | 77  | 7.44   |   |
| 11129 | Mex3a     | -1.53 | 87   | 14.01  | 33  | 9.17   |   |
| 11130 | Rap1b     | -1.53 | 140  | 63.75  | 64  | 41.75  |   |
| 11131 | Myeov2    | -1.53 | 113  | 56.91  | 56  | 37.25  |   |
| 11132 | Hnrnpa3_1 | -1.53 | 75   | 74.75  | 38  | 48.91  |   |
| 11133 | Rheb      | -1.53 | 327  | 58.18  | 138 | 38.06  |   |
| 11134 | Adgre5    | -1.53 | 48   | 3.21   | 20  | 2.1    |   |
| 11135 | Ddx58     | -1.53 | 45   | 5.56   | 22  | 3.63   |   |
| 11136 | Map3k14   | -1.53 | 33   | 1.18   | 27  | 0.77   |   |
| 11137 | mrpl24    | -1.53 | 129  | 15.63  | 82  | 10.22  |   |
| 11138 | Arhgap18  | -1.53 | 220  | 19.63  | 118 | 12.83  |   |
| 11139 | Slc25a4   | -1.53 | 832  | 158.38 | 370 | 103.57 |   |
| 11140 | Nans      | -1.53 | 242  | 27.86  | 115 | 18.21  |   |
| 11141 | Txlna     | -1.53 | 175  | 14.52  | 87  | 9.49   |   |
| 11142 | Tollip    | -1.53 | 356  | 21.98  | 156 | 14.35  |   |
| 11143 | Hspa4     | -1.53 | 1798 | 90.79  | 801 | 59.28  |   |
| 11144 | Kctd15    | -1.53 | 74   | 6.47   | 32  | 4.22   |   |
| 11145 | Fpgs      | -1.53 | 78   | 8.64   | 35  | 5.64   |   |
| 11146 | Zc3h11a   | -1.53 | 1387 | 69.91  | 678 | 45.61  |   |
| 11147 | Syne1     | -1.53 | 67   | 0.41   | 37  | 0.27   |   |
| 11148 | Ube2e3    | -1.53 | 472  | 64.19  | 216 | 41.87  |   |
| 11149 | Nudcd3    | -1.54 | 30   | 13.14  | 16  | 8.56   |   |
| 11150 | Snrpa     | -1.54 | 199  | 39.82  | 90  | 25.93  |   |
| 11151 | Snrpd3    | -1.54 | 204  | 62.38  | 83  | 40.62  |   |
| 11152 | Srek1     | -1.54 | 293  | 20.36  | 174 | 13.24  |   |
| 11153 | Ninl      | -1.54 | 660  | 25.02  | 325 | 16.28  |   |
| 11154 | Crif2     | -1.54 | 44   | 7.48   | 21  | 4.86   |   |
| 11155 | Lbh       | -1.54 | 115  | 40.81  | 42  | 26.53  |   |
| 11156 | Plxdc1    | -1.54 | 111  | 6.59   | 44  | 4.28   |   |
| 11157 | Elf1      | -1.54 | 262  | 14.2   | 119 | 9.23   |   |
| 11158 | Mmadhc    | -1.54 | 96   | 15.03  | 41  | 9.76   |   |
| 11159 | Dnajc2    | -1.54 | 102  | 10.03  | 57  | 6.51   |   |
| 11160 | Chd2      | -1.54 | 551  | 11.84  | 265 | 7.68   |   |
| 11161 | Pik3c2a   | -1.54 | 527  | 12.88  | 251 | 8.36   |   |
| 11162 | Cdc42     | -1.54 | 663  | 151.52 | 297 | 98.29  |   |
| 11163 | Adss      | -1.54 | 221  | 18.25  | 100 | 11.84  |   |
| 11164 | Bcam      | -1.54 | 532  | 53.39  | 237 | 34.61  |   |
| 11165 | Polb      | -1.54 | 118  | 13.95  | 74  | 9.04   |   |
| 11166 | Adprhl2   | -1.54 | 141  | 19.44  | 63  | 12.61  |   |
| 11167 | Wipf2     | -1.54 | 95   | 8.45   | 51  | 5.48   |   |
| 11168 | Pmvk      | -1.54 | 103  | 16.88  | 54  | 10.94  |   |
| 11169 | Elof1     | -1.54 | 248  | 53.78  | 111 | 34.84  |   |
| 11170 | Supt6h    | -1.54 | 1515 | 53.76  | 680 | 34.82  |   |
| 11171 | Fubp1     | -1.54 | 656  | 40.72  | 308 | 26.37  |   |
| 11172 | Abcb10    | -1.54 | 152  | 7.33   | 63  | 4.74   |   |
| 11173 | Capza1    | -1.54 | 560  | 40.94  | 251 | 26.5   |   |

Supplemental Table 2  
Vehicle versus FSH, 24 hours

|       | A              | B     | C    | D      | E   | F     | G |
|-------|----------------|-------|------|--------|-----|-------|---|
| 11174 | Snx12          | -1.54 | 295  | 19.4   | 154 | 12.56 |   |
| 11175 | Nrg1           | -1.55 | 237  | 5.6    | 129 | 3.63  |   |
| 11176 | Tanc1          | -1.55 | 1504 | 36.31  | 689 | 23.49 |   |
| 11177 | Mpdz           | -1.55 | 302  | 8.39   | 156 | 5.42  |   |
| 11178 | AABR07059168.2 | -1.55 | 70   | 6.08   | 30  | 3.92  |   |
| 11179 | Ankrd29_1      | -1.55 | 8    | 2.73   | 2   | 1.76  |   |
| 11180 | Apoo           | -1.55 | 45   | 7.2    | 22  | 4.65  |   |
| 11181 | Bcl7b          | -1.55 | 117  | 11.09  | 56  | 7.17  |   |
| 11182 | Ccdc66         | -1.55 | 133  | 5.39   | 67  | 3.48  |   |
| 11183 | Ciart          | -1.55 | 9    | 1.29   | 6   | 0.83  |   |
| 11184 | Def6           | -1.55 | 31   | 2.71   | 18  | 1.75  |   |
| 11185 | Gk             | -1.55 | 48   | 2.11   | 34  | 1.36  |   |
| 11186 | Gpn3           | -1.55 | 54   | 7.03   | 24  | 4.54  |   |
| 11187 | Gzmb_2         | -1.55 | 6    | 1.45   | 3   | 0.94  |   |
| 11188 | Habp4          | -1.55 | 81   | 7.45   | 40  | 4.81  |   |
| 11189 | Ints1_1        | -1.55 | 0    | 1.78   | 0   | 1.15  |   |
| 11190 | Kifc3          | -1.55 | 105  | 6.74   | 41  | 4.35  |   |
| 11191 | LOC102552705   | -1.55 | 21   | 2.83   | 11  | 1.83  |   |
| 11192 | Mina           | -1.55 | 20   | 3.22   | 10  | 2.08  |   |
| 11193 | Muc6           | -1.55 | 15   | 0.32   | 7   | 0.21  |   |
| 11194 | Nkain1         | -1.55 | 17   | 4      | 9   | 2.58  |   |
| 11195 | RGD1562200     | -1.55 | 11   | 2      | 13  | 1.29  |   |
| 11196 | Rnf219         | -1.55 | 86   | 4.75   | 38  | 3.07  |   |
| 11197 | Vipr2          | -1.55 | 15   | 0.52   | 15  | 0.33  |   |
| 11198 | B9d2           | -1.55 | 24   | 3.67   | 19  | 2.37  |   |
| 11199 | Bmp3           | -1.55 | 10   | 0.43   | 5   | 0.28  |   |
| 11200 | Chn2           | -1.55 | 403  | 18     | 209 | 11.63 |   |
| 11201 | Dynlrb1        | -1.55 | 361  | 122.69 | 184 | 79.24 |   |
| 11202 | LOC102557117   | -1.55 | 8    | 12.06  | 1   | 7.79  |   |
| 11203 | Nfe2l3_2       | -1.55 | 18   | 2.31   | 8   | 1.49  |   |
| 11204 | Rapgef4        | -1.55 | 33   | 0.74   | 14  | 0.48  |   |
| 11205 | Rps27a-ps1     | -1.55 | 0    | 8.23   | 0   | 5.31  |   |
| 11206 | Scly           | -1.55 | 23   | 1.02   | 8   | 0.66  |   |
| 11207 | Sv2a           | -1.55 | 33   | 1.58   | 14  | 1.02  |   |
| 11208 | Tmem68         | -1.55 | 167  | 10.1   | 77  | 6.52  |   |
| 11209 | Wdyhv1         | -1.55 | 45   | 4.03   | 26  | 2.6   |   |
| 11210 | Acss2          | -1.55 | 445  | 32.68  | 192 | 21.09 |   |
| 11211 | Pdcd6ip        | -1.55 | 900  | 36.07  | 398 | 23.27 |   |
| 11212 | Arhgef1        | -1.55 | 587  | 38.94  | 273 | 25.12 |   |
| 11213 | Atp5h          | -1.55 | 224  | 82.85  | 118 | 53.35 |   |
| 11214 | Lrrc59         | -1.55 | 881  | 77.45  | 388 | 49.88 |   |
| 11215 | Naa25          | -1.55 | 299  | 12.78  | 159 | 8.23  |   |
| 11216 | AABR07044089.1 | -1.55 | 110  | 26.07  | 44  | 16.78 |   |
| 11217 | Fbxl7          | -1.55 | 62   | 3.87   | 27  | 2.49  |   |
| 11218 | Utp18          | -1.55 | 95   | 9.26   | 41  | 5.96  |   |
| 11219 | Mtpn           | -1.56 | 281  | 51.09  | 125 | 32.84 |   |
| 11220 | Dip2c          | -1.56 | 349  | 13.04  | 169 | 8.38  |   |
| 11221 | Ankib1         | -1.56 | 328  | 9.43   | 174 | 6.06  |   |
| 11222 | Med22_2        | -1.56 | 1    | 22.65  | 0   | 14.54 |   |
| 11223 | Gnb4           | -1.56 | 206  | 29.13  | 88  | 18.7  |   |
| 11224 | Mef2a          | -1.56 | 279  | 15.62  | 129 | 10.02 |   |
| 11225 | Mrps18b        | -1.56 | 134  | 16.33  | 58  | 10.47 |   |
| 11226 | AABR07035818.1 | -1.56 | 116  | 43.89  | 51  | 28.14 |   |
| 11227 | Ddx52          | -1.56 | 83   | 5.45   | 42  | 3.49  |   |



Supplemental Table 2  
Vehicle versus FSH, 24 hours

|       | A               | B     | C    | D      | E    | F      | G |
|-------|-----------------|-------|------|--------|------|--------|---|
| 11228 | Smim11          | -1.56 | 69   | 16.98  | 24   | 10.88  |   |
| 11229 | Dbi             | -1.56 | 273  | 28.45  | 142  | 18.22  |   |
| 11230 | Foxp1           | -1.56 | 1005 | 57.25  | 535  | 36.66  |   |
| 11231 | Usp16           | -1.56 | 200  | 12.35  | 85   | 7.91   |   |
| 11232 | Tnpo1           | -1.56 | 1116 | 32.32  | 516  | 20.68  |   |
| 11233 | Med15           | -1.56 | 814  | 34.73  | 384  | 22.22  |   |
| 11234 | Ldlr            | -1.56 | 3328 | 172.33 | 1457 | 110.19 |   |
| 11235 | Trip6           | -1.56 | 256  | 33.63  | 117  | 21.51  |   |
| 11236 | Zbtb47          | -1.56 | 104  | 8.54   | 44   | 5.46   |   |
| 11237 | Ccna2           | -1.56 | 21   | 2.64   | 9    | 1.69   |   |
| 11238 | Golm1           | -1.56 | 61   | 5.22   | 29   | 3.34   |   |
| 11239 | Crk             | -1.56 | 324  | 37.98  | 142  | 24.27  |   |
| 11240 | Sqle            | -1.57 | 437  | 36.38  | 188  | 23.24  |   |
| 11241 | Adk             | -1.57 | 448  | 33.91  | 202  | 21.66  |   |
| 11242 | Mid2            | -1.57 | 83   | 2.88   | 40   | 1.84   |   |
| 11243 | Pcf11           | -1.57 | 300  | 8.86   | 122  | 5.65   |   |
| 11244 | Gadd45a         | -1.57 | 99   | 16.46  | 38   | 10.5   |   |
| 11245 | Cpsf3l          | -1.57 | 179  | 15.46  | 87   | 9.86   |   |
| 11246 | Tacc2           | -1.57 | 368  | 6.26   | 179  | 3.99   |   |
| 11247 | Pola1           | -1.57 | 110  | 3.84   | 71   | 2.45   |   |
| 11248 | Rpl32_1         | -1.57 | 58   | 392.4  | 33   | 250.3  |   |
| 11249 | Dlat            | -1.57 | 139  | 17.25  | 73   | 11     |   |
| 11250 | Rab3ip          | -1.57 | 160  | 12.97  | 65   | 8.27   |   |
| 11251 | Arhgap29        | -1.57 | 1550 | 59.45  | 665  | 37.89  |   |
| 11252 | Asap1           | -1.57 | 220  | 11.17  | 103  | 7.12   |   |
| 11253 | Ict1            | -1.57 | 63   | 17.15  | 36   | 10.93  |   |
| 11254 | RGD1309104      | -1.57 | 123  | 8.54   | 62   | 5.44   |   |
| 11255 | Gpatch11        | -1.57 | 72   | 3.55   | 30   | 2.26   |   |
| 11256 | Sypl1           | -1.57 | 186  | 27.57  | 99   | 17.56  |   |
| 11257 | Taf1d           | -1.57 | 172  | 10.79  | 73   | 6.88   |   |
| 11258 | RGD1559786      | -1.57 | 101  | 15.91  | 45   | 10.13  |   |
| 11259 | Lpin2           | -1.57 | 157  | 5.65   | 77   | 3.6    |   |
| 11260 | Ywhaz           | -1.57 | 1880 | 190.14 | 820  | 120.99 |   |
| 11261 | Carm1           | -1.57 | 350  | 29.28  | 188  | 18.62  |   |
| 11262 | Aatf            | -1.57 | 115  | 8.91   | 77   | 5.67   |   |
| 11263 | Prss12          | -1.57 | 25   | 1.6    | 11   | 1.01   |   |
| 11264 | Thns1           | -1.57 | 17   | 1.49   | 7    | 0.95   |   |
| 11265 | Frmf4a          | -1.57 | 39   | 4.87   | 27   | 3.1    |   |
| 11266 | Itga9           | -1.57 | 53   | 2.56   | 25   | 1.63   |   |
| 11267 | Lca5            | -1.57 | 31   | 1      | 18   | 0.64   |   |
| 11268 | Sgol1           | -1.57 | 33   | 1.8    | 16   | 1.14   |   |
| 11269 | Zgrf1           | -1.57 | 29   | 0.8    | 17   | 0.51   |   |
| 11270 | ENSRNOG00000061 | -1.57 | 270  | 17.87  | 113  | 11.36  |   |
| 11271 | Hars            | -1.57 | 258  | 30.77  | 110  | 19.54  |   |
| 11272 | Arhgef17        | -1.58 | 1002 | 37.35  | 443  | 23.7   |   |
| 11273 | Ide             | -1.58 | 791  | 33.97  | 358  | 21.55  |   |
| 11274 | Nop14           | -1.58 | 188  | 10.36  | 80   | 6.57   |   |
| 11275 | Taf12           | -1.58 | 67   | 5.29   | 28   | 3.36   |   |
| 11276 | Ctnna1          | -1.58 | 1344 | 98.18  | 615  | 62.24  |   |
| 11277 | Sgms1           | -1.58 | 341  | 13.02  | 157  | 8.25   |   |
| 11278 | AABR07006894.1  | -1.58 | 20   | 1.8    | 9    | 1.14   |   |
| 11279 | Recql           | -1.58 | 176  | 10.25  | 92   | 6.49   |   |
| 11280 | Ptk2            | -1.58 | 715  | 30.85  | 288  | 19.52  |   |
| 11281 | Clasrp          | -1.58 | 274  | 19.81  | 147  | 12.54  |   |

Supplemental Table 2  
Vehicle versus FSH, 24 hours

|       | A          | B     | C    | D      | E   | F      | G |
|-------|------------|-------|------|--------|-----|--------|---|
| 11282 | Setd8      | -1.58 | 246  | 79.2   | 122 | 50.07  |   |
| 11283 | B3gat3     | -1.58 | 229  | 31.66  | 98  | 20.01  |   |
| 11284 | Kctd6      | -1.58 | 26   | 3.69   | 15  | 2.33   |   |
| 11285 | Pagr1      | -1.58 | 19   | 7.52   | 10  | 4.75   |   |
| 11286 | Zcrb1      | -1.58 | 88   | 8.74   | 54  | 5.52   |   |
| 11287 | Atp6v1c1   | -1.58 | 317  | 26.29  | 176 | 16.61  |   |
| 11288 | Ccrn4l     | -1.58 | 25   | 2.2    | 10  | 1.39   |   |
| 11289 | Dusp22     | -1.58 | 53   | 4.95   | 45  | 3.13   |   |
| 11290 | Gpatch3    | -1.58 | 26   | 3.22   | 12  | 2.03   |   |
| 11291 | RGD1311747 | -1.58 | 88   | 8.55   | 34  | 5.4    |   |
| 11292 | Rgs3       | -1.58 | 57   | 2.05   | 26  | 1.3    |   |
| 11293 | Pkn3       | -1.58 | 559  | 15.26  | 367 | 9.64   |   |
| 11294 | Ipo5       | -1.58 | 1242 | 93.36  | 518 | 58.97  |   |
| 11295 | Sdcbp      | -1.58 | 735  | 71.76  | 341 | 45.32  |   |
| 11296 | Prrc1      | -1.58 | 205  | 29.02  | 99  | 18.32  |   |
| 11297 | Slc41a2    | -1.58 | 158  | 6.8    | 69  | 4.29   |   |
| 11298 | Fer        | -1.58 | 180  | 5.49   | 98  | 3.47   |   |
| 11299 | Snopc3     | -1.59 | 180  | 19.84  | 92  | 12.52  |   |
| 11300 | Arhgdia    | -1.59 | 2178 | 287.6  | 938 | 181.42 |   |
| 11301 | Hdac1l_1   | -1.59 | 490  | 71.4   | 213 | 45.03  |   |
| 11302 | Ak6        | -1.59 | 52   | 27.52  | 16  | 17.35  |   |
| 11303 | Ipo4       | -1.59 | 534  | 34.46  | 240 | 21.72  |   |
| 11304 | Fam120a    | -1.59 | 1375 | 100.54 | 619 | 63.37  |   |
| 11305 | Mras       | -1.59 | 1054 | 59.9   | 457 | 37.74  |   |
| 11306 | Marveld2   | -1.59 | 34   | 2.68   | 17  | 1.69   |   |
| 11307 | Ftsj3      | -1.59 | 184  | 15.72  | 81  | 9.9    |   |
| 11308 | Wee1       | -1.59 | 88   | 5.1    | 34  | 3.21   |   |
| 11309 | Arhgef5    | -1.59 | 72   | 3.4    | 37  | 2.14   |   |
| 11310 | Ska3       | -1.59 | 80   | 4.13   | 33  | 2.59   |   |
| 11311 | Anln       | -1.59 | 42   | 5.33   | 20  | 3.35   |   |
| 11312 | Ogfod1     | -1.59 | 52   | 4.55   | 21  | 2.86   |   |
| 11313 | Kif3a      | -1.59 | 100  | 5.21   | 48  | 3.27   |   |
| 11314 | Ubald1_2   | -1.59 | 53   | 15.34  | 26  | 9.63   |   |
| 11315 | Spsb2_1    | -1.59 | 1    | 9.04   | 3   | 5.67   |   |
| 11316 | Sptlc2     | -1.59 | 175  | 17.49  | 76  | 10.97  |   |
| 11317 | Exog       | -1.59 | 59   | 2.69   | 29  | 1.69   |   |
| 11318 | Ubtd2      | -1.59 | 129  | 8.85   | 60  | 5.55   |   |
| 11319 | Prim2      | -1.6  | 97   | 5.8    | 58  | 3.64   |   |
| 11320 | Aacs       | -1.6  | 374  | 26.63  | 166 | 16.68  |   |
| 11321 | Angpt1     | -1.6  | 116  | 8.56   | 61  | 5.36   |   |
| 11322 | Otulin     | -1.6  | 27   | 12.42  | 9   | 7.77   |   |
| 11323 | Cox6b1_1   | -1.6  | 175  | 92.45  | 76  | 57.83  |   |
| 11324 | Kpna1      | -1.6  | 292  | 12.74  | 127 | 7.96   |   |
| 11325 | Nr2f6      | -1.6  | 143  | 12.23  | 62  | 7.65   |   |
| 11326 | Prkx       | -1.6  | 183  | 10.58  | 78  | 6.61   |   |
| 11327 | Dab2       | -1.6  | 599  | 43.04  | 252 | 26.9   |   |
| 11328 | RGD1304694 | -1.6  | 296  | 21.49  | 126 | 13.42  |   |
| 11329 | Fndc3a     | -1.6  | 436  | 18.51  | 213 | 11.54  |   |
| 11330 | Lars       | -1.6  | 460  | 25.45  | 211 | 15.86  |   |
| 11331 | AC094605.2 | -1.61 | 6    | 0.75   | 2   | 0.47   |   |
| 11332 | Ehbp111    | -1.61 | 79   | 3.4    | 44  | 2.11   |   |
| 11333 | Elovl6_2   | -1.61 | 108  | 27.9   | 36  | 17.37  |   |
| 11334 | Lym1       | -1.61 | 23   | 2.81   | 11  | 1.75   |   |
| 11335 | Napb       | -1.61 | 39   | 2.97   | 17  | 1.85   |   |

Supplemental Table 2  
Vehicle versus FSH, 24 hours

|       | A               | B     | C    | D      | E   | F      | G |
|-------|-----------------|-------|------|--------|-----|--------|---|
| 11336 | RGD1307704      | -1.61 | 0    | 0.67   | 0   | 0.42   |   |
| 11337 | Sfmbt2          | -1.61 | 35   | 1.34   | 17  | 0.83   |   |
| 11338 | Zp3             | -1.61 | 7    | 1.32   | 4   | 0.82   |   |
| 11339 | AABR07006333.1  | -1.61 | 3    | 2.78   | 3   | 1.73   |   |
| 11340 | AABR07010620.1  | -1.61 | 20   | 1.69   | 9   | 1.05   |   |
| 11341 | AABR07012795.1  | -1.61 | 5    | 5.95   | 2   | 3.7    |   |
| 11342 | AABR07037203.1  | -1.61 | 7    | 2.26   | 2   | 1.41   |   |
| 11343 | Abhd17c         | -1.61 | 273  | 22.43  | 111 | 13.97  |   |
| 11344 | Ankrd34a        | -1.61 | 7    | 0.61   | 3   | 0.38   |   |
| 11345 | Dgat2           | -1.61 | 23   | 1.11   | 10  | 0.69   |   |
| 11346 | Dok1            | -1.61 | 21   | 3.03   | 9   | 1.89   |   |
| 11347 | ENSRNOG00000053 | -1.61 | 7    | 0.52   | 5   | 0.32   |   |
| 11348 | Golga3          | -1.61 | 79   | 14.33  | 48  | 8.93   |   |
| 11349 | Kcna4           | -1.61 | 7    | 0.56   | 3   | 0.35   |   |
| 11350 | Kcnj3           | -1.61 | 14   | 0.95   | 10  | 0.59   |   |
| 11351 | L3mbtl1         | -1.61 | 21   | 0.69   | 17  | 0.43   |   |
| 11352 | LOC100912571    | -1.61 | 0    | 5.47   | 0   | 3.41   |   |
| 11353 | LOC691056       | -1.61 | 8    | 0.82   | 9   | 0.51   |   |
| 11354 | Lrp4            | -1.61 | 71   | 1.78   | 32  | 1.11   |   |
| 11355 | Pdzd7           | -1.61 | 28   | 0.89   | 14  | 0.56   |   |
| 11356 | Proca1          | -1.61 | 19   | 1.23   | 18  | 0.77   |   |
| 11357 | RGD1564036      | -1.61 | 32   | 2.76   | 31  | 1.72   |   |
| 11358 | Sass6_1         | -1.61 | 5    | 2.69   | 4   | 1.67   |   |
| 11359 | Thoc1_2         | -1.61 | 7    | 1.69   | 3   | 1.05   |   |
| 11360 | Tp53rk          | -1.61 | 20   | 2.8    | 9   | 1.74   |   |
| 11361 | Xkr4            | -1.61 | 89   | 1.79   | 55  | 1.12   |   |
| 11362 | Zfp819          | -1.61 | 8    | 0.82   | 4   | 0.51   |   |
| 11363 | Sh2d3c          | -1.61 | 11   | 0.53   | 4   | 0.33   |   |
| 11364 | Bhlhe40         | -1.61 | 285  | 29.15  | 122 | 18.13  |   |
| 11365 | Mib1            | -1.61 | 442  | 19.72  | 230 | 12.26  |   |
| 11366 | Rbfox2          | -1.61 | 374  | 16.41  | 205 | 10.2   |   |
| 11367 | Bach1           | -1.61 | 98   | 9.05   | 35  | 5.62   |   |
| 11368 | Rrbp1           | -1.61 | 940  | 43.72  | 413 | 27.15  |   |
| 11369 | Tax1bp3         | -1.61 | 596  | 123.92 | 255 | 76.95  |   |
| 11370 | Rapgef6         | -1.61 | 171  | 4.28   | 98  | 2.66   |   |
| 11371 | Chordc1         | -1.61 | 180  | 12.18  | 79  | 7.55   |   |
| 11372 | Fam50a_1        | -1.61 | 0    | 11.59  | 0   | 7.18   |   |
| 11373 | Lmnb1           | -1.61 | 197  | 21.23  | 87  | 13.15  |   |
| 11374 | Kremen1         | -1.62 | 149  | 6.48   | 54  | 4.01   |   |
| 11375 | Pole            | -1.62 | 127  | 4.03   | 65  | 2.5    |   |
| 11376 | Akip1           | -1.62 | 104  | 7.55   | 45  | 4.67   |   |
| 11377 | Fam96b          | -1.62 | 112  | 36.31  | 44  | 22.47  |   |
| 11378 | Map4k4          | -1.62 | 2070 | 77.83  | 923 | 48.15  |   |
| 11379 | Adrm1           | -1.62 | 274  | 43.05  | 113 | 26.63  |   |
| 11380 | Rpl14           | -1.62 | 500  | 252.98 | 227 | 156.32 |   |
| 11381 | Plec            | -1.62 | 2237 | 31.83  | 951 | 19.66  |   |
| 11382 | AC136795.1      | -1.62 | 0    | 7.03   | 0   | 4.34   |   |
| 11383 | Srp19           | -1.62 | 47   | 13.17  | 22  | 8.13   |   |
| 11384 | Prpf38a         | -1.62 | 137  | 17     | 64  | 10.49  |   |
| 11385 | Nup35           | -1.62 | 81   | 10.95  | 38  | 6.76   |   |
| 11386 | Dock6           | -1.62 | 123  | 3.81   | 54  | 2.35   |   |
| 11387 | Fam208b         | -1.62 | 242  | 7.38   | 102 | 4.55   |   |
| 11388 | Taf10           | -1.62 | 173  | 46.58  | 77  | 28.73  |   |
| 11389 | Fbrs            | -1.62 | 36   | 11.74  | 22  | 7.24   |   |

Supplemental Table 2  
Vehicle versus FSH, 24 hours

|       | A              | B     | C    | D      | E    | F      | G |
|-------|----------------|-------|------|--------|------|--------|---|
| 11390 | Ndufc1         | -1.62 | 40   | 21.41  | 22   | 13.2   |   |
| 11391 | Nnat           | -1.62 | 121  | 19.58  | 59   | 12.07  |   |
| 11392 | Nol12          | -1.62 | 40   | 6.61   | 18   | 4.07   |   |
| 11393 | Dimt1          | -1.62 | 169  | 12.22  | 104  | 7.53   |   |
| 11394 | Nox4           | -1.62 | 74   | 2.19   | 20   | 1.35   |   |
| 11395 | Ube2f          | -1.62 | 71   | 14.74  | 32   | 9.08   |   |
| 11396 | Etf1           | -1.62 | 537  | 53.75  | 253  | 33.13  |   |
| 11397 | Kidins220      | -1.62 | 932  | 28.73  | 403  | 17.7   |   |
| 11398 | Edem3          | -1.62 | 656  | 22.6   | 345  | 13.92  |   |
| 11399 | Trove2         | -1.62 | 29   | 3.96   | 15   | 2.44   |   |
| 11400 | Cdh11          | -1.62 | 180  | 6.94   | 74   | 4.27   |   |
| 11401 | Lsm7           | -1.62 | 93   | 43.4   | 42   | 26.71  |   |
| 11402 | AC096370.2     | -1.63 | 0    | 14.41  | 0    | 8.87   |   |
| 11403 | AABR07068341.1 | -1.63 | 39   | 2.84   | 11   | 1.75   |   |
| 11404 | Alkbh7         | -1.63 | 27   | 6.54   | 15   | 4.02   |   |
| 11405 | Arhgef25       | -1.63 | 121  | 12.32  | 51   | 7.57   |   |
| 11406 | Atox1          | -1.63 | 62   | 23.43  | 33   | 14.4   |   |
| 11407 | Bola3          | -1.63 | 41   | 5.93   | 21   | 3.64   |   |
| 11408 | Ghr            | -1.63 | 173  | 6.19   | 92   | 3.81   |   |
| 11409 | LOC100911865   | -1.63 | 37   | 3.94   | 19   | 2.42   |   |
| 11410 | Mtif2          | -1.63 | 49   | 2.45   | 42   | 1.51   |   |
| 11411 | Nup160         | -1.63 | 154  | 8.81   | 75   | 5.41   |   |
| 11412 | Rnf217         | -1.63 | 80   | 5.3    | 27   | 3.26   |   |
| 11413 | Runx1          | -1.63 | 156  | 5.72   | 60   | 3.52   |   |
| 11414 | Prr11          | -1.63 | 31   | 3.4    | 14   | 2.09   |   |
| 11415 | Srp54a         | -1.63 | 238  | 22.57  | 102  | 13.86  |   |
| 11416 | Srm            | -1.63 | 1    | 46.47  | 0    | 28.52  |   |
| 11417 | Slc20a1        | -1.63 | 330  | 20.23  | 151  | 12.41  |   |
| 11418 | Efemp1         | -1.63 | 198  | 21.75  | 81   | 13.34  |   |
| 11419 | LOC100361694   | -1.63 | 117  | 75.93  | 50   | 46.59  |   |
| 11420 | Ptpmt1         | -1.63 | 55   | 6.88   | 27   | 4.22   |   |
| 11421 | Guf1           | -1.63 | 72   | 2.57   | 35   | 1.58   |   |
| 11422 | Coq10b         | -1.63 | 170  | 21.52  | 75   | 13.18  |   |
| 11423 | Lum            | -1.63 | 19   | 2.35   | 8    | 1.44   |   |
| 11424 | Nnmt           | -1.63 | 47   | 4.41   | 18   | 2.7    |   |
| 11425 | Ptrhd1         | -1.63 | 19   | 5.17   | 8    | 3.16   |   |
| 11426 | Tmod1          | -1.63 | 33   | 1.87   | 23   | 1.14   |   |
| 11427 | Sergef         | -1.63 | 99   | 6.56   | 67   | 4.01   |   |
| 11428 | Tarsl2         | -1.63 | 30   | 2.48   | 14   | 1.51   |   |
| 11429 | Fyn            | -1.64 | 564  | 22.47  | 235  | 13.74  |   |
| 11430 | Rbm19          | -1.64 | 209  | 8.41   | 89   | 5.14   |   |
| 11431 | Ptbp2          | -1.64 | 316  | 10.61  | 231  | 6.47   |   |
| 11432 | Pprc1          | -1.64 | 500  | 21.9   | 206  | 13.35  |   |
| 11433 | Slc3a2         | -1.64 | 654  | 73.75  | 273  | 44.95  |   |
| 11434 | Rps23_1        | -1.64 | 312  | 327.34 | 142  | 199.49 |   |
| 11435 | Mitd1          | -1.64 | 30   | 5.54   | 17   | 3.38   |   |
| 11436 | Smn1           | -1.64 | 115  | 16.14  | 58   | 9.83   |   |
| 11437 | LOC102549726   | -1.64 | 25   | 5.07   | 13   | 3.09   |   |
| 11438 | Siah2          | -1.64 | 77   | 7.61   | 36   | 4.64   |   |
| 11439 | Dlgap4         | -1.64 | 755  | 33.85  | 371  | 20.61  |   |
| 11440 | Utp6           | -1.64 | 120  | 14.63  | 53   | 8.91   |   |
| 11441 | Dr1_1          | -1.64 | 7    | 14.83  | 2    | 9.03   |   |
| 11442 | Hnrnp1         | -1.64 | 1190 | 83.14  | 590  | 50.62  |   |
| 11443 | Dst            | -1.64 | 3352 | 30.41  | 1433 | 18.5   |   |

Supplemental Table 2  
Vehicle versus FSH, 24 hours

|       | A               | B     | C    | D       | E   | F       | G |
|-------|-----------------|-------|------|---------|-----|---------|---|
| 11444 | L3mbtl3         | -1.64 | 107  | 7.81    | 45  | 4.75    |   |
| 11445 | Aff2            | -1.64 | 1599 | 35.44   | 676 | 21.55   |   |
| 11446 | Cox5a           | -1.65 | 181  | 86.38   | 75  | 52.5    |   |
| 11447 | Farp1           | -1.65 | 373  | 11.36   | 164 | 6.9     |   |
| 11448 | Camlg           | -1.65 | 179  | 19.65   | 81  | 11.94   |   |
| 11449 | Ascc2           | -1.65 | 162  | 13.51   | 81  | 8.21    |   |
| 11450 | Pitpna          | -1.65 | 307  | 36.91   | 126 | 22.42   |   |
| 11451 | ENSRNOG00000043 | -1.65 | 278  | 9.5     | 119 | 5.77    |   |
| 11452 | Metazoa_SRP_22  | -1.65 | 12   | 55.46   | 2   | 33.68   |   |
| 11453 | Ugcg            | -1.65 | 144  | 12.9    | 57  | 7.82    |   |
| 11454 | Hnrnpdl         | -1.65 | 280  | 28.64   | 119 | 17.37   |   |
| 11455 | Timm17a         | -1.65 | 123  | 35      | 60  | 21.23   |   |
| 11456 | Vmp1            | -1.65 | 362  | 29.71   | 150 | 18      |   |
| 11457 | Kcnj14          | -1.65 | 12   | 1.1     | 5   | 0.66    |   |
| 11458 | Ccdc138         | -1.65 | 19   | 1.46    | 13  | 0.88    |   |
| 11459 | Ctps1           | -1.65 | 322  | 27.78   | 134 | 16.82   |   |
| 11460 | Cyb561          | -1.65 | 16   | 1.12    | 9   | 0.68    |   |
| 11461 | Fam172a         | -1.65 | 119  | 8.08    | 76  | 4.89    |   |
| 11462 | Nudt8           | -1.65 | 14   | 3.68    | 7   | 2.23    |   |
| 11463 | Prkci           | -1.65 | 347  | 17.21   | 146 | 10.42   |   |
| 11464 | Ptgfr           | -1.65 | 13   | 1       | 5   | 0.6     |   |
| 11465 | Rn60_X_0648.1   | -1.65 | 0    | 2.8     | 0   | 1.69    |   |
| 11466 | Serpini1        | -1.65 | 35   | 1.92    | 15  | 1.16    |   |
| 11467 | Sgtb            | -1.65 | 27   | 2.02    | 9   | 1.22    |   |
| 11468 | Tnfaip2         | -1.65 | 30   | 1.57    | 11  | 0.95    |   |
| 11469 | Znhit2          | -1.65 | 23   | 4.66    | 10  | 2.82    |   |
| 11470 | Ddr1            | -1.66 | 530  | 28.71   | 210 | 17.34   |   |
| 11471 | Mpzl3           | -1.66 | 71   | 4.52    | 29  | 2.73    |   |
| 11472 | Maoa            | -1.66 | 285  | 29.67   | 121 | 17.9    |   |
| 11473 | Rpl12           | -1.66 | 81   | 195.59  | 45  | 118.01  |   |
| 11474 | AABR07015081.2  | -1.66 | 1097 | 1702.63 | 472 | 1026.95 |   |
| 11475 | Dnajc9          | -1.66 | 97   | 14.28   | 41  | 8.61    |   |
| 11476 | Ccdc174         | -1.66 | 47   | 5.75    | 24  | 3.47    |   |
| 11477 | Tnfaip3         | -1.66 | 43   | 4.18    | 17  | 2.52    |   |
| 11478 | Vps37c          | -1.66 | 143  | 9.77    | 67  | 5.88    |   |
| 11479 | LOC100364748    | -1.66 | 134  | 19.42   | 73  | 11.69   |   |
| 11480 | Klf12           | -1.66 | 124  | 2.34    | 67  | 1.4     |   |
| 11481 | Dapk3           | -1.66 | 242  | 33.39   | 97  | 20.08   |   |
| 11482 | Mlit3           | -1.66 | 97   | 5.92    | 56  | 3.56    |   |
| 11483 | Mnat1           | -1.66 | 123  | 16.66   | 76  | 10.02   |   |
| 11484 | Myh9            | -1.66 | 0    | 1.16    | 0   | 0.7     |   |
| 11485 | Nucb2           | -1.66 | 185  | 11.41   | 78  | 6.86    |   |
| 11486 | Psmc9           | -1.66 | 100  | 13.91   | 48  | 8.36    |   |
| 11487 | Tfpt            | -1.67 | 86   | 10      | 48  | 6       |   |
| 11488 | Mbd2            | -1.67 | 214  | 23.69   | 105 | 14.22   |   |
| 11489 | Eif4ebp1        | -1.67 | 358  | 101.44  | 161 | 60.84   |   |
| 11490 | Galk1           | -1.67 | 100  | 26.91   | 44  | 16.13   |   |
| 11491 | Ssx2ip          | -1.67 | 122  | 10.17   | 52  | 6.1     |   |
| 11492 | Mpc1            | -1.67 | 94   | 22.42   | 36  | 13.44   |   |
| 11493 | Utp11l          | -1.67 | 87   | 15.12   | 35  | 9.07    |   |
| 11494 | Dazap1          | -1.67 | 311  | 31.41   | 170 | 18.82   |   |
| 11495 | Pfdn2           | -1.67 | 177  | 14.5    | 97  | 8.69    |   |
| 11496 | Ipo9            | -1.67 | 772  | 43.63   | 328 | 26.14   |   |
| 11497 | Stam            | -1.67 | 254  | 17.53   | 108 | 10.5    |   |

Supplemental Table 2  
Vehicle versus FSH, 24 hours

|       | A              | B     | C    | D      | E   | F      | G |
|-------|----------------|-------|------|--------|-----|--------|---|
| 11498 | Ptpn1          | -1.67 | 259  | 30.73  | 120 | 18.41  |   |
| 11499 | Sdpr           | -1.67 | 216  | 16.49  | 86  | 9.88   |   |
| 11500 | Rbm3           | -1.67 | 769  | 100.4  | 317 | 60.15  |   |
| 11501 | Rpl41          | -1.67 | 1030 | 660.88 | 442 | 395.58 |   |
| 11502 | RGD1312005     | -1.67 | 18   | 2.01   | 7   | 1.2    |   |
| 11503 | Slc7a11        | -1.67 | 20   | 0.48   | 8   | 0.28   |   |
| 11504 | Fgfr3          | -1.67 | 24   | 1.18   | 11  | 0.71   |   |
| 11505 | Tomm70a        | -1.67 | 68   | 15.1   | 25  | 9.04   |   |
| 11506 | Gfod1          | -1.67 | 112  | 5.75   | 22  | 3.44   |   |
| 11507 | Map6           | -1.67 | 149  | 2.43   | 51  | 1.45   |   |
| 11508 | Nsmce2         | -1.67 | 156  | 14.29  | 115 | 8.55   |   |
| 11509 | Rplp2          | -1.67 | 0    | 12.17  | 0   | 7.28   |   |
| 11510 | Tet3           | -1.67 | 445  | 12.47  | 205 | 7.45   |   |
| 11511 | Metrl          | -1.67 | 709  | 101.91 | 319 | 60.87  |   |
| 11512 | S1pr2          | -1.68 | 185  | 15.27  | 74  | 9.11   |   |
| 11513 | Zfp498         | -1.68 | 73   | 6.35   | 42  | 3.79   |   |
| 11514 | Eif4g1         | -1.68 | 31   | 97.12  | 22  | 57.93  |   |
| 11515 | Esf1           | -1.68 | 158  | 10.11  | 72  | 6.02   |   |
| 11516 | Vps36          | -1.68 | 101  | 14.85  | 47  | 8.84   |   |
| 11517 | Grk6           | -1.68 | 348  | 15.15  | 147 | 9.01   |   |
| 11518 | Kif14          | -1.68 | 33   | 1.09   | 18  | 0.65   |   |
| 11519 | Sertad2        | -1.68 | 131  | 14.57  | 56  | 8.66   |   |
| 11520 | Cep120         | -1.68 | 591  | 20.86  | 228 | 12.4   |   |
| 11521 | Rpl18          | -1.68 | 1085 | 443.46 | 427 | 263.43 |   |
| 11522 | Mbd3           | -1.68 | 288  | 38.84  | 142 | 23.07  |   |
| 11523 | Tuba1c_2       | -1.68 | 55   | 82.73  | 18  | 49.13  |   |
| 11524 | Tspan12        | -1.68 | 134  | 9.13   | 51  | 5.42   |   |
| 11525 | Psmg2          | -1.69 | 70   | 10.25  | 35  | 6.08   |   |
| 11526 | Rbx1           | -1.69 | 249  | 95.25  | 148 | 56.47  |   |
| 11527 | Skil           | -1.69 | 362  | 27.79  | 137 | 16.47  |   |
| 11528 | Eif5a2         | -1.69 | 105  | 5.27   | 41  | 3.12   |   |
| 11529 | Enoph1         | -1.69 | 141  | 15.95  | 61  | 9.44   |   |
| 11530 | Kank1          | -1.69 | 1542 | 60.75  | 649 | 35.96  |   |
| 11531 | Ddhd1          | -1.69 | 164  | 5.93   | 71  | 3.51   |   |
| 11532 | Birc2          | -1.69 | 229  | 14.85  | 82  | 8.79   |   |
| 11533 | Rnf103         | -1.69 | 184  | 10.04  | 84  | 5.94   |   |
| 11534 | AABR07042821.1 | -1.69 | 54   | 95.58  | 23  | 56.51  |   |
| 11535 | Rassf3         | -1.69 | 152  | 7.27   | 61  | 4.29   |   |
| 11536 | Derl2          | -1.69 | 84   | 13.79  | 41  | 8.14   |   |
| 11537 | Pam16          | -1.69 | 59   | 15.27  | 28  | 9.02   |   |
| 11538 | Ufm1           | -1.69 | 104  | 11.21  | 40  | 6.62   |   |
| 11539 | Fez2           | -1.7  | 297  | 24.93  | 132 | 14.7   |   |
| 11540 | Surf6          | -1.7  | 66   | 8.5    | 43  | 5.01   |   |
| 11541 | Kpnb1          | -1.7  | 1884 | 80.48  | 756 | 47.45  |   |
| 11542 | Acot9          | -1.7  | 132  | 16.28  | 48  | 9.6    |   |
| 11543 | Insig1         | -1.7  | 756  | 113.77 | 339 | 67.03  |   |
| 11544 | Cap1           | -1.7  | 2104 | 201.67 | 845 | 118.8  |   |
| 11545 | Dlgap5         | -1.7  | 87   | 6.74   | 38  | 3.97   |   |
| 11546 | Usp31          | -1.7  | 130  | 5.47   | 55  | 3.22   |   |
| 11547 | RGD1308706     | -1.7  | 270  | 27.09  | 116 | 15.95  |   |
| 11548 | Tns3           | -1.7  | 1641 | 45.97  | 640 | 27.05  |   |
| 11549 | Pim3           | -1.7  | 613  | 87.64  | 247 | 51.57  |   |
| 11550 | Tmem43         | -1.7  | 1116 | 93.49  | 441 | 55     |   |
| 11551 | Dus2           | -1.7  | 56   | 5.41   | 27  | 3.18   |   |

Supplemental Table 2  
Vehicle versus FSH, 24 hours

|       | A              | B     | C   | D       | E   | F     | G |
|-------|----------------|-------|-----|---------|-----|-------|---|
| 11552 | Mars           | -1.7  | 454 | 35.19   | 182 | 20.69 |   |
| 11553 | Naa50          | -1.7  | 61  | 6.83    | 20  | 4.02  |   |
| 11554 | Eaf1           | -1.7  | 158 | 7.24    | 61  | 4.25  |   |
| 11555 | Eif2s1         | -1.7  | 366 | 54.65   | 152 | 32.08 |   |
| 11556 | Ptpn12         | -1.7  | 344 | 20.87   | 141 | 12.24 |   |
| 11557 | Ppia           | -1.71 | 470 | 1013.61 | 191 | 594   |   |
| 11558 | Ppme1          | -1.71 | 278 | 25.37   | 130 | 14.86 |   |
| 11559 | Kif1c          | -1.71 | 753 | 39.36   | 310 | 23.06 |   |
| 11560 | Eps8           | -1.71 | 244 | 12.45   | 106 | 7.29  |   |
| 11561 | Ctif           | -1.71 | 691 | 17.56   | 263 | 10.28 |   |
| 11562 | Rgs19          | -1.71 | 171 | 29.75   | 76  | 17.4  |   |
| 11563 | Nfic           | -1.71 | 197 | 28.5    | 85  | 16.66 |   |
| 11564 | Smarca5        | -1.71 | 262 | 25.29   | 120 | 14.77 |   |
| 11565 | Bax            | -1.71 | 98  | 20.88   | 43  | 12.19 |   |
| 11566 | Igsf9          | -1.71 | 470 | 22.91   | 191 | 13.36 |   |
| 11567 | Sh3bp4         | -1.71 | 659 | 29.88   | 266 | 17.43 |   |
| 11568 | Tcp1           | -1.72 | 604 | 78.22   | 253 | 45.6  |   |
| 11569 | Foxn2          | -1.72 | 218 | 10.58   | 87  | 6.17  |   |
| 11570 | AABR07033324.1 | -1.72 | 75  | 92.58   | 26  | 53.85 |   |
| 11571 | Cct6a          | -1.72 | 765 | 91.1    | 303 | 52.95 |   |
| 11572 | Cdc37          | -1.72 | 634 | 43.69   | 307 | 25.4  |   |
| 11573 | Cpm            | -1.72 | 12  | 0.23    | 5   | 0.13  |   |
| 11574 | Dus4l          | -1.72 | 27  | 1.84    | 16  | 1.07  |   |
| 11575 | LOC362863      | -1.72 | 9   | 0.26    | 7   | 0.15  |   |
| 11576 | Lsm4           | -1.72 | 97  | 23.25   | 45  | 13.51 |   |
| 11577 | MGC109340_2    | -1.72 | 0   | 2.29    | 0   | 1.33  |   |
| 11578 | Mospd2         | -1.72 | 100 | 4.97    | 49  | 2.89  |   |
| 11579 | RGD1311458     | -1.72 | 38  | 3.57    | 18  | 2.08  |   |
| 11580 | Tmbim1         | -1.72 | 9   | 0.67    | 4   | 0.39  |   |
| 11581 | AABR07059879.1 | -1.72 | 0   | 2.52    | 0   | 1.46  |   |
| 11582 | Bmp15          | -1.72 | 5   | 0.41    | 2   | 0.24  |   |
| 11583 | Ccdc159        | -1.72 | 7   | 0.71    | 6   | 0.41  |   |
| 11584 | Cdkn3          | -1.72 | 38  | 7.1     | 14  | 4.13  |   |
| 11585 | Faim_1         | -1.72 | 0   | 1.08    | 0   | 0.63  |   |
| 11586 | Fscn2          | -1.72 | 15  | 0.73    | 7   | 0.42  |   |
| 11587 | Gldc           | -1.72 | 16  | 0.66    | 7   | 0.38  |   |
| 11588 | Gli2           | -1.72 | 41  | 0.78    | 20  | 0.46  |   |
| 11589 | Icoslg         | -1.72 | 10  | 0.45    | 8   | 0.26  |   |
| 11590 | LOC100911575   | -1.72 | 0   | 14.32   | 0   | 8.32  |   |
| 11591 | Lrp2           | -1.72 | 30  | 0.4     | 21  | 0.23  |   |
| 11592 | Lym7           | -1.72 | 9   | 0.7     | 4   | 0.4   |   |
| 11593 | Mrs2           | -1.72 | 60  | 5.75    | 25  | 3.34  |   |
| 11594 | Ncbp2_2        | -1.72 | 0   | 2.65    | 0   | 1.54  |   |
| 11595 | Pbx4           | -1.72 | 28  | 0.9     | 20  | 0.52  |   |
| 11596 | Prkch          | -1.72 | 24  | 1.21    | 18  | 0.71  |   |
| 11597 | RGD1563815     | -1.72 | 8   | 0.4     | 7   | 0.23  |   |
| 11598 | Snrnp48        | -1.72 | 126 | 5.19    | 82  | 3.02  |   |
| 11599 | Spryd3         | -1.72 | 141 | 12.39   | 57  | 7.2   |   |
| 11600 | Stard6         | -1.72 | 10  | 0.87    | 8   | 0.51  |   |
| 11601 | Syde2          | -1.72 | 170 | 9.21    | 68  | 5.35  |   |
| 11602 | Tmlhe          | -1.72 | 75  | 8.35    | 50  | 4.85  |   |
| 11603 | Vegfc          | -1.72 | 141 | 12.28   | 58  | 7.14  |   |
| 11604 | Zdhhc14        | -1.72 | 31  | 0.41    | 14  | 0.24  |   |
| 11605 | Zfp28          | -1.72 | 41  | 3.41    | 16  | 1.98  |   |

Supplemental Table 2  
Vehicle versus FSH, 24 hours

|       | A              | B     | C    | D       | E    | F      | G |
|-------|----------------|-------|------|---------|------|--------|---|
| 11606 | AABR07059380.1 | -1.72 | 5    | 0.26    | 2    | 0.15   |   |
| 11607 | AC117889.1     | -1.72 | 6    | 1.82    | 5    | 1.06   |   |
| 11608 | Avil           | -1.72 | 55   | 0.41    | 29   | 0.24   |   |
| 11609 | Fbxo45         | -1.72 | 32   | 4.4     | 19   | 2.56   |   |
| 11610 | Gna12          | -1.72 | 25   | 12.66   | 14   | 7.36   |   |
| 11611 | L3hypdh        | -1.72 | 6    | 0.68    | 3    | 0.39   |   |
| 11612 | LOC681195      | -1.72 | 1    | 2.58    | 0    | 1.5    |   |
| 11613 | Magoh          | -1.72 | 135  | 46.49   | 55   | 27.02  |   |
| 11614 | March3         | -1.72 | 60   | 1.93    | 33   | 1.12   |   |
| 11615 | Nek10          | -1.72 | 30   | 0.37    | 26   | 0.21   |   |
| 11616 | P2ry1          | -1.72 | 5    | 0.39    | 2    | 0.23   |   |
| 11617 | Paqr4          | -1.72 | 5    | 0.61    | 2    | 0.35   |   |
| 11618 | Prkar1b        | -1.72 | 9    | 1.16    | 7    | 0.67   |   |
| 11619 | Sap18          | -1.72 | 0    | 2.4     | 0    | 1.4    |   |
| 11620 | Spry3          | -1.72 | 5    | 0.37    | 3    | 0.22   |   |
| 11621 | Tox3           | -1.72 | 9    | 0.39    | 6    | 0.23   |   |
| 11622 | Tppp3          | -1.72 | 2    | 1.28    | 0    | 0.74   |   |
| 11623 | Ttc16          | -1.72 | 15   | 0.93    | 5    | 0.54   |   |
| 11624 | Slc29a4        | -1.72 | 5    | 0.52    | 2    | 0.3    |   |
| 11625 | Rap1gds1       | -1.72 | 760  | 40.99   | 305  | 23.8   |   |
| 11626 | Uso1           | -1.72 | 677  | 37.97   | 271  | 22.03  |   |
| 11627 | Rtn4           | -1.72 | 1155 | 57.21   | 477  | 33.19  |   |
| 11628 | Exoc6b         | -1.73 | 549  | 12.36   | 255  | 7.16   |   |
| 11629 | Cep170b        | -1.73 | 467  | 16.16   | 186  | 9.36   |   |
| 11630 | Cdh3           | -1.73 | 173  | 10.07   | 67   | 5.83   |   |
| 11631 | Wdr46          | -1.73 | 137  | 10.22   | 57   | 5.91   |   |
| 11632 | Rnf2           | -1.73 | 361  | 35.62   | 153  | 20.62  |   |
| 11633 | Tuba1a         | -1.73 | 3240 | 1702.86 | 1373 | 985.22 |   |
| 11634 | Cox7a2_1       | -1.73 | 472  | 378.44  | 182  | 218.91 |   |
| 11635 | Crel2          | -1.73 | 213  | 36.39   | 89   | 21.04  |   |
| 11636 | Vegfa          | -1.73 | 710  | 42.09   | 279  | 24.3   |   |
| 11637 | Azin1          | -1.73 | 1088 | 59.19   | 426  | 34.17  |   |
| 11638 | Ehd2           | -1.73 | 618  | 71.79   | 245  | 41.44  |   |
| 11639 | Kifc1          | -1.73 | 82   | 7.95    | 39   | 4.59   |   |
| 11640 | Plcd1          | -1.73 | 78   | 6.17    | 30   | 3.56   |   |
| 11641 | Usp46          | -1.73 | 516  | 18.19   | 194  | 10.49  |   |
| 11642 | Nenf           | -1.74 | 70   | 22.1    | 28   | 12.73  |   |
| 11643 | Rapgef2        | -1.74 | 485  | 9.75    | 214  | 5.62   |   |
| 11644 | Hnrnpa1        | -1.74 | 784  | 171.14  | 406  | 98.51  |   |
| 11645 | Sema6a         | -1.74 | 244  | 15.82   | 101  | 9.1    |   |
| 11646 | Ept1           | -1.74 | 143  | 9.66    | 57   | 5.56   |   |
| 11647 | Pwp1           | -1.74 | 114  | 12.24   | 53   | 7.04   |   |
| 11648 | Prdm10         | -1.74 | 145  | 3.56    | 60   | 2.05   |   |
| 11649 | Mical2         | -1.74 | 3734 | 101.48  | 1531 | 58.3   |   |
| 11650 | Cebpg          | -1.74 | 179  | 12.54   | 73   | 7.21   |   |
| 11651 | Iqsec1         | -1.74 | 473  | 19.92   | 192  | 11.43  |   |
| 11652 | Hnrnpa0        | -1.74 | 251  | 69.26   | 98   | 39.7   |   |
| 11653 | Col1a1         | -1.75 | 142  | 6.07    | 56   | 3.48   |   |
| 11654 | Tcf20          | -1.75 | 343  | 11.76   | 147  | 6.74   |   |
| 11655 | Slc25a13       | -1.75 | 96   | 11.33   | 40   | 6.48   |   |
| 11656 | Hip1r          | -1.75 | 40   | 1.89    | 18   | 1.08   |   |
| 11657 | Ipo11          | -1.75 | 143  | 8.42    | 85   | 4.82   |   |
| 11658 | RGD1565641     | -1.75 | 38   | 19.96   | 17   | 11.42  |   |
| 11659 | Itga8          | -1.75 | 622  | 21.82   | 251  | 12.49  |   |



Supplemental Table 2  
Vehicle versus FSH, 24 hours

|       | A              | B     | C    | D      | E    | F      | G |
|-------|----------------|-------|------|--------|------|--------|---|
| 11660 | Ddah1          | -1.75 | 3278 | 195.22 | 1261 | 111.67 |   |
| 11661 | Ccdc124        | -1.75 | 104  | 14.57  | 43   | 8.34   |   |
| 11662 | Fnbp1          | -1.75 | 155  | 7.13   | 84   | 4.07   |   |
| 11663 | Lrrc20         | -1.75 | 93   | 4.98   | 43   | 2.85   |   |
| 11664 | Wars           | -1.75 | 355  | 22.15  | 147  | 12.66  |   |
| 11665 | Nol10          | -1.75 | 164  | 10.18  | 86   | 5.81   |   |
| 11666 | Arpp19         | -1.75 | 84   | 41.16  | 38   | 23.5   |   |
| 11667 | Fam219a        | -1.75 | 139  | 8.35   | 52   | 4.77   |   |
| 11668 | Gabpb2         | -1.75 | 31   | 4.74   | 16   | 2.71   |   |
| 11669 | Fhl3           | -1.75 | 92   | 12.51  | 36   | 7.14   |   |
| 11670 | Parva          | -1.75 | 1166 | 55.6   | 449  | 31.72  |   |
| 11671 | Eif2b3         | -1.75 | 133  | 9.24   | 71   | 5.27   |   |
| 11672 | Gpx8           | -1.75 | 300  | 67.57  | 119  | 38.53  |   |
| 11673 | Rps10_2        | -1.75 | 99   | 221.3  | 64   | 126.14 |   |
| 11674 | Col27a1        | -1.75 | 296  | 9.13   | 115  | 5.2    |   |
| 11675 | Pno1           | -1.75 | 36   | 16.8   | 22   | 9.57   |   |
| 11676 | Bysl           | -1.76 | 103  | 14.16  | 47   | 8.06   |   |
| 11677 | LOC100911730   | -1.76 | 32   | 155.08 | 15   | 88.2   |   |
| 11678 | Shfm1          | -1.76 | 150  | 45.66  | 63   | 25.97  |   |
| 11679 | AABR07050417.1 | -1.76 | 46   | 3.95   | 22   | 2.25   |   |
| 11680 | Cdyl2          | -1.76 | 33   | 2.8    | 25   | 1.59   |   |
| 11681 | Eprs           | -1.76 | 1377 | 65.13  | 564  | 36.99  |   |
| 11682 | Psmc8          | -1.76 | 736  | 111.21 | 287  | 63.17  |   |
| 11683 | Fgd1           | -1.76 | 74   | 9.79   | 32   | 5.56   |   |
| 11684 | Hcfc1r1        | -1.76 | 47   | 34.75  | 16   | 19.7   |   |
| 11685 | Chka           | -1.76 | 219  | 7.91   | 105  | 4.48   |   |
| 11686 | Fam114a1       | -1.76 | 205  | 23.98  | 73   | 13.6   |   |
| 11687 | Tuba4a         | -1.76 | 43   | 7.06   | 11   | 4      |   |
| 11688 | Eif2s2         | -1.76 | 526  | 82.88  | 214  | 46.96  |   |
| 11689 | Leo1           | -1.77 | 138  | 11.15  | 55   | 6.32   |   |
| 11690 | Phf20l1        | -1.77 | 101  | 6.65   | 58   | 3.76   |   |
| 11691 | Fam63b         | -1.77 | 124  | 6.84   | 42   | 3.88   |   |
| 11692 | Wdr74          | -1.77 | 127  | 17.2   | 49   | 9.73   |   |
| 11693 | Rnf126         | -1.77 | 122  | 18.54  | 51   | 10.49  |   |
| 11694 | Htatif2        | -1.77 | 27   | 3.24   | 12   | 1.83   |   |
| 11695 | Suv39h2        | -1.77 | 24   | 1.02   | 12   | 0.58   |   |
| 11696 | Herc6          | -1.77 | 41   | 1.25   | 15   | 0.71   |   |
| 11697 | Jmjd7          | -1.77 | 25   | 3.36   | 13   | 1.9    |   |
| 11698 | Clip1          | -1.77 | 332  | 9.22   | 143  | 5.21   |   |
| 11699 | Pdcl3          | -1.77 | 295  | 35.48  | 113  | 20.02  |   |
| 11700 | Rab2a          | -1.77 | 284  | 87.87  | 125  | 49.56  |   |
| 11701 | LOC100910838   | -1.77 | 30   | 4.33   | 14   | 2.44   |   |
| 11702 | Tmem47         | -1.77 | 457  | 26.12  | 173  | 14.73  |   |
| 11703 | Ppic           | -1.77 | 144  | 21.36  | 51   | 12.04  |   |
| 11704 | Ect2           | -1.77 | 128  | 6.04   | 52   | 3.41   |   |
| 11705 | Lxn            | -1.77 | 34   | 11.39  | 14   | 6.42   |   |
| 11706 | Rpl22l1        | -1.78 | 108  | 57.4   | 42   | 32.33  |   |
| 11707 | Ndrp4          | -1.78 | 195  | 12.97  | 85   | 7.3    |   |
| 11708 | Mid1ip1        | -1.78 | 441  | 57.72  | 169  | 32.48  |   |
| 11709 | Haus3          | -1.78 | 39   | 3.76   | 15   | 2.12   |   |
| 11710 | Rab1a          | -1.78 | 738  | 75.57  | 311  | 42.43  |   |
| 11711 | LOC100912182   | -1.78 | 166  | 88.95  | 61   | 49.94  |   |
| 11712 | Nckap1         | -1.78 | 1603 | 108.41 | 608  | 60.79  |   |
| 11713 | Nup210         | -1.78 | 75   | 2.51   | 29   | 1.41   |   |

Supplemental Table 2  
Vehicle versus FSH, 24 hours

|       | A              | B     | C    | D      | E   | F      | G |
|-------|----------------|-------|------|--------|-----|--------|---|
| 11714 | Rin2           | -1.79 | 449  | 18.86  | 224 | 10.54  |   |
| 11715 | AABR07058884.2 | -1.79 | 43   | 10.14  | 18  | 5.67   |   |
| 11716 | Cacnb1         | -1.79 | 22   | 0.95   | 6   | 0.53   |   |
| 11717 | Hist1h2bk      | -1.79 | 13   | 8.5    | 4   | 4.75   |   |
| 11718 | Parbp          | -1.79 | 7    | 0.73   | 7   | 0.41   |   |
| 11719 | Rps19bp1       | -1.79 | 13   | 6.29   | 5   | 3.52   |   |
| 11720 | Gata3          | -1.79 | 19   | 1.22   | 7   | 0.68   |   |
| 11721 | Nr4a3          | -1.79 | 22   | 0.74   | 6   | 0.41   |   |
| 11722 | Rrm2           | -1.79 | 18   | 5.52   | 8   | 3.09   |   |
| 11723 | Adamts5        | -1.79 | 1477 | 98.65  | 549 | 55.11  |   |
| 11724 | Inadl          | -1.79 | 379  | 9.91   | 164 | 5.53   |   |
| 11725 | AABR07021840.1 | -1.79 | 260  | 18.53  | 120 | 10.34  |   |
| 11726 | Ppp3r1         | -1.79 | 73   | 49.32  | 33  | 27.52  |   |
| 11727 | Rps27l         | -1.79 | 198  | 70.08  | 77  | 39.09  |   |
| 11728 | LOC364561      | -1.79 | 189  | 46.33  | 84  | 25.83  |   |
| 11729 | Dnajb2         | -1.79 | 365  | 32.51  | 159 | 18.12  |   |
| 11730 | Pdzd2          | -1.79 | 402  | 8      | 180 | 4.46   |   |
| 11731 | Tsfm           | -1.8  | 63   | 10.47  | 40  | 5.83   |   |
| 11732 | Acat2          | -1.8  | 367  | 48.44  | 155 | 26.95  |   |
| 11733 | Taok1          | -1.8  | 407  | 29.27  | 181 | 16.29  |   |
| 11734 | Mef2d          | -1.8  | 470  | 33.81  | 188 | 18.81  |   |
| 11735 | Zfp385a        | -1.8  | 35   | 3.26   | 14  | 1.81   |   |
| 11736 | Arhgef39       | -1.8  | 59   | 3.68   | 24  | 2.05   |   |
| 11737 | Ntmt1          | -1.8  | 152  | 20.32  | 73  | 11.29  |   |
| 11738 | Lss            | -1.8  | 562  | 36.1   | 227 | 20.05  |   |
| 11739 | Gng12          | -1.8  | 170  | 38.77  | 95  | 21.51  |   |
| 11740 | Wwtr1          | -1.8  | 609  | 64.6   | 231 | 35.83  |   |
| 11741 | Mapre1         | -1.8  | 619  | 63.05  | 236 | 34.97  |   |
| 11742 | Trio           | -1.8  | 867  | 19.83  | 363 | 10.99  |   |
| 11743 | Ap1ar          | -1.81 | 93   | 12.66  | 39  | 7.01   |   |
| 11744 | Cyb5r1         | -1.81 | 51   | 5.71   | 20  | 3.16   |   |
| 11745 | Pycr1          | -1.81 | 22   | 4.18   | 8   | 2.31   |   |
| 11746 | Taf1b          | -1.81 | 45   | 2.55   | 34  | 1.41   |   |
| 11747 | LOC100364500   | -1.81 | 18   | 4.53   | 5   | 2.51   |   |
| 11748 | Phgdh          | -1.81 | 288  | 37.04  | 111 | 20.48  |   |
| 11749 | Jmjd6          | -1.81 | 104  | 13.49  | 42  | 7.46   |   |
| 11750 | Dnm1l          | -1.81 | 340  | 24.08  | 149 | 13.31  |   |
| 11751 | LOC100365902   | -1.81 | 140  | 29.13  | 55  | 16.08  |   |
| 11752 | Rhoa           | -1.81 | 2176 | 335.37 | 822 | 185.15 |   |
| 11753 | Veph1          | -1.81 | 86   | 2.04   | 51  | 1.13   |   |
| 11754 | Uprt           | -1.81 | 33   | 5.64   | 13  | 3.11   |   |
| 11755 | Rn60_10_0890.5 | -1.82 | 2    | 11.23  | 0   | 6.18   |   |
| 11756 | Ube2a          | -1.82 | 88   | 19.12  | 40  | 10.53  |   |
| 11757 | Ric8a          | -1.82 | 417  | 39.62  | 157 | 21.8   |   |
| 11758 | Impad1         | -1.82 | 5    | 25.2   | 2   | 13.86  |   |
| 11759 | Yes1           | -1.82 | 259  | 11.45  | 153 | 6.3    |   |
| 11760 | Lin7c          | -1.82 | 143  | 42.75  | 53  | 23.52  |   |
| 11761 | Tmem29         | -1.82 | 44   | 27.44  | 17  | 15.09  |   |
| 11762 | Chic2          | -1.82 | 101  | 10.26  | 55  | 5.63   |   |
| 11763 | Mrpl18         | -1.82 | 56   | 11.87  | 27  | 6.51   |   |
| 11764 | Map3k7         | -1.82 | 2    | 14.82  | 3   | 8.13   |   |
| 11765 | Ccdc86         | -1.82 | 133  | 19.61  | 51  | 10.75  |   |
| 11766 | Gar1           | -1.82 | 67   | 9.77   | 22  | 5.36   |   |
| 11767 | Usp12          | -1.82 | 61   | 12.4   | 19  | 6.8    |   |

Supplemental Table 2  
Vehicle versus FSH, 24 hours

|       | A              | B     | C   | D      | E   | F      | G |
|-------|----------------|-------|-----|--------|-----|--------|---|
| 11768 | Wfs1           | -1.82 | 183 | 11.65  | 64  | 6.39   |   |
| 11769 | Lpcat4         | -1.83 | 70  | 9.71   | 27  | 5.32   |   |
| 11770 | Pus1           | -1.83 | 71  | 8.52   | 42  | 4.67   |   |
| 11771 | LOC100911393_1 | -1.83 | 38  | 11.02  | 16  | 6.03   |   |
| 11772 | LOC100360573_1 | -1.83 | 146 | 416.65 | 64  | 228.04 |   |
| 11773 | Jade1          | -1.83 | 213 | 7.39   | 91  | 4.04   |   |
| 11774 | Slk            | -1.83 | 281 | 15.54  | 110 | 8.5    |   |
| 11775 | Baz1a          | -1.83 | 242 | 10.15  | 96  | 5.55   |   |
| 11776 | Eif1a          | -1.83 | 234 | 27.55  | 90  | 15.06  |   |
| 11777 | Smyd5          | -1.83 | 122 | 12.39  | 49  | 6.77   |   |
| 11778 | Nab1           | -1.83 | 182 | 8.65   | 73  | 4.72   |   |
| 11779 | Rrp12          | -1.83 | 196 | 10.36  | 77  | 5.65   |   |
| 11780 | Cramp1l        | -1.83 | 410 | 15.82  | 163 | 8.63   |   |
| 11781 | Slc7a5         | -1.83 | 386 | 26.88  | 147 | 14.66  |   |
| 11782 | Psmc3          | -1.83 | 565 | 82.9   | 211 | 45.2   |   |
| 11783 | AABR07010460.1 | -1.84 | 7   | 1.14   | 3   | 0.62   |   |
| 11784 | AABR07040855.1 | -1.84 | 16  | 4.63   | 6   | 2.52   |   |
| 11785 | Camkmt         | -1.84 | 15  | 1.96   | 10  | 1.07   |   |
| 11786 | Ccdc64         | -1.84 | 29  | 0.58   | 8   | 0.32   |   |
| 11787 | Dgkb           | -1.84 | 63  | 0.3    | 30  | 0.17   |   |
| 11788 | Klf13          | -1.84 | 32  | 6.62   | 22  | 3.61   |   |
| 11789 | Kihl29         | -1.84 | 32  | 0.26   | 16  | 0.14   |   |
| 11790 | LOC100912866   | -1.84 | 60  | 3.03   | 13  | 1.65   |   |
| 11791 | Mff_1          | -1.84 | 0   | 2.09   | 0   | 1.14   |   |
| 11792 | Plekha4        | -1.84 | 10  | 0.67   | 6   | 0.36   |   |
| 11793 | Ppm1e          | -1.84 | 25  | 0.73   | 22  | 0.4    |   |
| 11794 | Prorsd1        | -1.84 | 9   | 1.94   | 3   | 1.05   |   |
| 11795 | Tigd2          | -1.84 | 24  | 3.78   | 9   | 2.06   |   |
| 11796 | Tmem170a       | -1.84 | 90  | 4.91   | 36  | 2.68   |   |
| 11797 | Ube2l6         | -1.84 | 28  | 4.24   | 10  | 2.31   |   |
| 11798 | AC097939.1     | -1.84 | 0   | 15.82  | 0   | 8.62   |   |
| 11799 | Dact1          | -1.84 | 8   | 0.81   | 3   | 0.44   |   |
| 11800 | Faxc           | -1.84 | 14  | 1.19   | 6   | 0.65   |   |
| 11801 | Filip1         | -1.84 | 33  | 0.63   | 13  | 0.34   |   |
| 11802 | Frmtd4b        | -1.84 | 30  | 0.9    | 22  | 0.49   |   |
| 11803 | Gramd2         | -1.84 | 10  | 1.42   | 7   | 0.77   |   |
| 11804 | Ncs1           | -1.84 | 82  | 4.08   | 35  | 2.22   |   |
| 11805 | Rapgef1l       | -1.84 | 16  | 1.73   | 6   | 0.94   |   |
| 11806 | Serpinb8       | -1.84 | 8   | 0.48   | 4   | 0.26   |   |
| 11807 | Wnk2           | -1.84 | 14  | 0.29   | 20  | 0.16   |   |
| 11808 | Zbtb8a         | -1.84 | 34  | 2.79   | 16  | 1.52   |   |
| 11809 | Kihl34         | -1.84 | 8   | 1.03   | 3   | 0.56   |   |
| 11810 | LOC100363048   | -1.84 | 9   | 16.61  | 3   | 9.05   |   |
| 11811 | Plekhg2        | -1.84 | 428 | 18.45  | 152 | 10.04  |   |
| 11812 | Sdc2           | -1.84 | 826 | 62.02  | 306 | 33.76  |   |
| 11813 | Arpc4          | -1.84 | 627 | 103.38 | 234 | 56.27  |   |
| 11814 | Sec24a         | -1.84 | 399 | 18.77  | 179 | 10.21  |   |
| 11815 | Sltm           | -1.84 | 484 | 21.77  | 216 | 11.84  |   |
| 11816 | Plekha2        | -1.84 | 408 | 15.95  | 155 | 8.67   |   |
| 11817 | Rps15a         | -1.84 | 127 | 313.83 | 66  | 170.44 |   |
| 11818 | Fabp5          | -1.84 | 81  | 28.6   | 30  | 15.52  |   |
| 11819 | Rbm7           | -1.84 | 103 | 14.99  | 36  | 8.13   |   |
| 11820 | Map2k4         | -1.84 | 145 | 18.53  | 69  | 10.06  |   |
| 11821 | Tceal8         | -1.84 | 333 | 78.71  | 122 | 42.72  |   |

Supplemental Table 2  
Vehicle versus FSH, 24 hours

|       | A              | B     | C     | D       | E    | F      | G |
|-------|----------------|-------|-------|---------|------|--------|---|
| 11822 | Apoe           | -1.84 | 76    | 12.02   | 28   | 6.52   |   |
| 11823 | Amotl1         | -1.84 | 108   | 6.44    | 58   | 3.49   |   |
| 11824 | AC107580.1     | -1.84 | 25    | 35.6    | 19   | 19.3   |   |
| 11825 | Klf16          | -1.84 | 133   | 12.11   | 49   | 6.57   |   |
| 11826 | Sort1          | -1.85 | 1030  | 34.97   | 389  | 18.94  |   |
| 11827 | Dixdc1         | -1.85 | 74    | 2.26    | 35   | 1.22   |   |
| 11828 | Lclat1         | -1.85 | 78    | 5.19    | 41   | 2.81   |   |
| 11829 | Aars           | -1.85 | 1089  | 73.08   | 405  | 39.54  |   |
| 11830 | Axl            | -1.85 | 1063  | 55.12   | 390  | 29.82  |   |
| 11831 | Pfkip          | -1.85 | 1965  | 176.74  | 781  | 95.59  |   |
| 11832 | Cyp51          | -1.85 | 1275  | 92.03   | 475  | 49.74  |   |
| 11833 | Serbp1         | -1.85 | 657   | 104.84  | 251  | 56.65  |   |
| 11834 | Strn3          | -1.85 | 710   | 25.69   | 289  | 13.87  |   |
| 11835 | LOC102551819   | -1.85 | 70    | 7.4     | 26   | 3.99   |   |
| 11836 | Trim68         | -1.85 | 60    | 4.29    | 17   | 2.31   |   |
| 11837 | Cacnb2         | -1.85 | 566   | 11.47   | 136  | 6.19   |   |
| 11838 | Arfp1          | -1.85 | 244   | 22.2    | 113  | 11.98  |   |
| 11839 | Cox6c          | -1.85 | 276   | 146.83  | 107  | 79.2   |   |
| 11840 | Utp20          | -1.85 | 576   | 13.92   | 212  | 7.51   |   |
| 11841 | Ddr2           | -1.85 | 121   | 6.46    | 47   | 3.48   |   |
| 11842 | Oca2           | -1.86 | 628   | 25.11   | 321  | 13.53  |   |
| 11843 | Tk1            | -1.86 | 117   | 10      | 47   | 5.39   |   |
| 11844 | Stx3           | -1.86 | 226   | 13.32   | 84   | 7.17   |   |
| 11845 | RGD1305014     | -1.86 | 44    | 3.26    | 17   | 1.75   |   |
| 11846 | Aes            | -1.86 | 327   | 127.15  | 123  | 68.43  |   |
| 11847 | Tlr2           | -1.86 | 27    | 2.59    | 10   | 1.4    |   |
| 11848 | LOC100912163   | -1.86 | 11    | 5.05    | 7    | 2.72   |   |
| 11849 | Thbs1          | -1.86 | 15706 | 1025.16 | 5750 | 551.57 |   |
| 11850 | Tfg            | -1.86 | 547   | 67.59   | 216  | 36.29  |   |
| 11851 | AABR07042397.1 | -1.86 | 0     | 22.78   | 0    | 12.23  |   |
| 11852 | Snrpd2         | -1.87 | 110   | 37.82   | 39   | 20.27  |   |
| 11853 | Rpl37a         | -1.87 | 396   | 81.48   | 156  | 43.65  |   |
| 11854 | Chmp2a         | -1.87 | 134   | 36.14   | 57   | 19.35  |   |
| 11855 | Ydjc           | -1.87 | 83    | 13.43   | 34   | 7.19   |   |
| 11856 | Aass           | -1.87 | 24    | 1.7     | 10   | 0.91   |   |
| 11857 | Arf2           | -1.87 | 126   | 13.05   | 43   | 6.99   |   |
| 11858 | Gulp1          | -1.87 | 163   | 6.32    | 91   | 3.38   |   |
| 11859 | Mettl2b        | -1.87 | 150   | 4.59    | 63   | 2.46   |   |
| 11860 | Ppp1r3b        | -1.87 | 22    | 1.08    | 7    | 0.58   |   |
| 11861 | Shmt1          | -1.87 | 29    | 2.31    | 22   | 1.24   |   |
| 11862 | Cenpt          | -1.87 | 48    | 4.19    | 14   | 2.24   |   |
| 11863 | Pcbp3          | -1.87 | 42    | 2.31    | 32   | 1.24   |   |
| 11864 | Nop58          | -1.87 | 357   | 34.46   | 147  | 18.44  |   |
| 11865 | Prickle1       | -1.87 | 259   | 13.28   | 96   | 7.1    |   |
| 11866 | B4galt5        | -1.87 | 328   | 19.56   | 125  | 10.46  |   |
| 11867 | Rwdd1          | -1.87 | 117   | 22.85   | 46   | 12.22  |   |
| 11868 | Uchl1          | -1.87 | 458   | 99.29   | 158  | 53.09  |   |
| 11869 | Gab1           | -1.87 | 427   | 27.85   | 152  | 14.88  |   |
| 11870 | Otud4          | -1.87 | 371   | 20.87   | 133  | 11.15  |   |
| 11871 | Nek6           | -1.87 | 136   | 12.35   | 52   | 6.6    |   |
| 11872 | Mrps26         | -1.87 | 50    | 12.61   | 18   | 6.73   |   |
| 11873 | Abcd4          | -1.87 | 122   | 8.38    | 48   | 4.47   |   |
| 11874 | Hnrnp1         | -1.88 | 81    | 16      | 41   | 8.53   |   |
| 11875 | Capn2          | -1.88 | 1007  | 64.99   | 381  | 34.64  |   |

Supplemental Table 2  
Vehicle versus FSH, 24 hours

|       | A              | B     | C     | D      | E    | F      | G |
|-------|----------------|-------|-------|--------|------|--------|---|
| 11876 | RGD1309079     | -1.88 | 616   | 26.79  | 225  | 14.27  |   |
| 11877 | Wsb2           | -1.88 | 737   | 113.72 | 265  | 60.5   |   |
| 11878 | Smad6          | -1.88 | 233   | 14.9   | 165  | 7.92   |   |
| 11879 | Tmed5          | -1.88 | 120   | 11.09  | 43   | 5.9    |   |
| 11880 | Npm1           | -1.88 | 435   | 115.18 | 183  | 61.21  |   |
| 11881 | Col11a1        | -1.88 | 22650 | 692.65 | 8089 | 367.59 |   |
| 11882 | Nras           | -1.88 | 263   | 48.45  | 96   | 25.7   |   |
| 11883 | Nbeal1         | -1.89 | 203   | 4.57   | 88   | 2.42   |   |
| 11884 | Ssfa2          | -1.89 | 557   | 21.25  | 196  | 11.27  |   |
| 11885 | Alcam          | -1.89 | 400   | 20.5   | 126  | 10.86  |   |
| 11886 | Cask_2         | -1.89 | 460   | 44.36  | 173  | 23.49  |   |
| 11887 | Lats2          | -1.89 | 645   | 29     | 243  | 15.34  |   |
| 11888 | Ahrr           | -1.89 | 42    | 1.17   | 20   | 0.62   |   |
| 11889 | Ak4            | -1.89 | 30    | 5.35   | 11   | 2.83   |   |
| 11890 | Flot1          | -1.89 | 312   | 29.8   | 118  | 15.75  |   |
| 11891 | Galnt13        | -1.89 | 78    | 1.25   | 46   | 0.66   |   |
| 11892 | Lck            | -1.89 | 11    | 1.32   | 5    | 0.7    |   |
| 11893 | Ndel1          | -1.89 | 279   | 23.04  | 117  | 12.18  |   |
| 11894 | Nog            | -1.89 | 22    | 3.37   | 8    | 1.78   |   |
| 11895 | RGD1310257     | -1.89 | 33    | 1.07   | 20   | 0.56   |   |
| 11896 | Rnaseh1        | -1.89 | 66    | 5.98   | 28   | 3.16   |   |
| 11897 | Rnls           | -1.89 | 29    | 1.53   | 52   | 0.81   |   |
| 11898 | Rpl36al_2      | -1.89 | 23    | 53.26  | 14   | 28.14  |   |
| 11899 | Shq1           | -1.89 | 34    | 1.86   | 18   | 0.98   |   |
| 11900 | Tmem234        | -1.89 | 25    | 3.38   | 14   | 1.79   |   |
| 11901 | Ttc25          | -1.89 | 20    | 1.12   | 11   | 0.59   |   |
| 11902 | AABR07058464.1 | -1.89 | 11    | 2.83   | 3    | 1.49   |   |
| 11903 | Alkbh2         | -1.89 | 11    | 2.27   | 7    | 1.2    |   |
| 11904 | Exoc6          | -1.89 | 52    | 2.71   | 35   | 1.43   |   |
| 11905 | Fam126b        | -1.89 | 58    | 2.93   | 48   | 1.55   |   |
| 11906 | Ifi44l         | -1.89 | 14    | 2.06   | 5    | 1.09   |   |
| 11907 | Lmo1           | -1.89 | 15    | 2.36   | 6    | 1.25   |   |
| 11908 | Tpmt           | -1.89 | 17    | 2.23   | 8    | 1.18   |   |
| 11909 | Hmgcs1         | -1.89 | 1705  | 126.98 | 616  | 67.02  |   |
| 11910 | Myo9a          | -1.9  | 426   | 10.33  | 178  | 5.45   |   |
| 11911 | Rasa1          | -1.9  | 567   | 38.26  | 217  | 20.18  |   |
| 11912 | Stx7           | -1.9  | 72    | 15.59  | 24   | 8.23   |   |
| 11913 | Kat2b          | -1.9  | 43    | 10.42  | 12   | 5.49   |   |
| 11914 | Map4k5         | -1.9  | 380   | 18.97  | 161  | 10     |   |
| 11915 | Slc9a3r1       | -1.9  | 81    | 13.36  | 32   | 7.04   |   |
| 11916 | Nr3c1_2        | -1.9  | 79    | 16.09  | 29   | 8.47   |   |
| 11917 | Tprg1l         | -1.9  | 548   | 74.31  | 198  | 39.12  |   |
| 11918 | Cycs_1         | -1.9  | 131   | 55.02  | 50   | 28.97  |   |
| 11919 | Hcfc2          | -1.9  | 175   | 14.59  | 83   | 7.68   |   |
| 11920 | Sptbn1         | -1.9  | 4483  | 134.21 | 1642 | 70.62  |   |
| 11921 | LOC498555      | -1.9  | 312   | 498.33 | 104  | 262.01 |   |
| 11922 | Tmem97         | -1.9  | 137   | 26.1   | 52   | 13.71  |   |
| 11923 | Eif4e2         | -1.9  | 280   | 29.67  | 104  | 15.58  |   |
| 11924 | Pdp2           | -1.9  | 121   | 14.01  | 43   | 7.36   |   |
| 11925 | Tomm6          | -1.91 | 38    | 39.87  | 14   | 20.92  |   |
| 11926 | Wwc2           | -1.91 | 1146  | 32.89  | 446  | 17.25  |   |
| 11927 | Higd1a         | -1.91 | 101   | 14.06  | 39   | 7.36   |   |
| 11928 | Rpp21          | -1.91 | 89    | 18.55  | 33   | 9.72   |   |
| 11929 | Dusp16         | -1.91 | 140   | 11.62  | 53   | 6.08   |   |

Supplemental Table 2  
Vehicle versus FSH, 24 hours

|       | A            | B     | C    | D      | E    | F      | G |
|-------|--------------|-------|------|--------|------|--------|---|
| 11930 | Fosl2        | -1.91 | 316  | 37.17  | 119  | 19.47  |   |
| 11931 | Diap2        | -1.91 | 50   | 2.94   | 26   | 1.54   |   |
| 11932 | Exo1         | -1.91 | 30   | 2.48   | 11   | 1.3    |   |
| 11933 | Ptger4       | -1.91 | 27   | 4.23   | 9    | 2.21   |   |
| 11934 | Mrip1        | -1.91 | 2256 | 59.86  | 806  | 31.29  |   |
| 11935 | Cchcr1       | -1.91 | 110  | 9.32   | 43   | 4.87   |   |
| 11936 | Haus6        | -1.91 | 65   | 5.72   | 25   | 2.98   |   |
| 11937 | Cfl2         | -1.92 | 323  | 27.52  | 117  | 14.36  |   |
| 11938 | Lpar4        | -1.92 | 47   | 2.33   | 16   | 1.22   |   |
| 11939 | Rpl27a       | -1.92 | 321  | 215.46 | 150  | 112.35 |   |
| 11940 | Ccdc6        | -1.92 | 161  | 18.69  | 86   | 9.74   |   |
| 11941 | Usp15        | -1.92 | 216  | 9.1    | 88   | 4.74   |   |
| 11942 | LOC689899    | -1.93 | 3    | 6.57   | 0    | 3.41   |   |
| 11943 | Slc31a1      | -1.93 | 171  | 24.64  | 74   | 12.78  |   |
| 11944 | Agtr1a       | -1.93 | 18   | 1.6    | 6    | 0.83   |   |
| 11945 | Jam3         | -1.93 | 285  | 29.67  | 115  | 15.4   |   |
| 11946 | LOC303566    | -1.93 | 16   | 1.28   | 5    | 0.66   |   |
| 11947 | Mtf1         | -1.93 | 0    | 0.81   | 0    | 0.42   |   |
| 11948 | Snrpe        | -1.93 | 38   | 33.38  | 11   | 17.32  |   |
| 11949 | Tprkb_2      | -1.93 | 0    | 6.61   | 0    | 3.43   |   |
| 11950 | Wbp4         | -1.93 | 67   | 6.78   | 42   | 3.52   |   |
| 11951 | Fam109b      | -1.93 | 15   | 1.3    | 6    | 0.68   |   |
| 11952 | Zfyve21      | -1.93 | 124  | 8.4    | 72   | 4.36   |   |
| 11953 | Rasa2        | -1.93 | 171  | 4.92   | 74   | 2.55   |   |
| 11954 | Agfg1        | -1.93 | 417  | 41.46  | 189  | 21.48  |   |
| 11955 | Tnks1bp1     | -1.93 | 524  | 20.02  | 183  | 10.37  |   |
| 11956 | Mrto4        | -1.93 | 107  | 16     | 35   | 8.28   |   |
| 11957 | Dctn6        | -1.93 | 183  | 37.64  | 72   | 19.46  |   |
| 11958 | Fxr1         | -1.93 | 70   | 24.71  | 39   | 12.78  |   |
| 11959 | Kri1         | -1.94 | 55   | 5.37   | 32   | 2.77   |   |
| 11960 | Esrra        | -1.94 | 119  | 10.4   | 40   | 5.37   |   |
| 11961 | Larp1b       | -1.94 | 114  | 5.79   | 40   | 2.99   |   |
| 11962 | LOC100363800 | -1.94 | 185  | 178.28 | 74   | 92.08  |   |
| 11963 | Tars         | -1.94 | 413  | 31.78  | 150  | 16.41  |   |
| 11964 | Mkl1         | -1.94 | 236  | 9.07   | 91   | 4.68   |   |
| 11965 | Adgrl3       | -1.94 | 905  | 18.02  | 310  | 9.3    |   |
| 11966 | Clec16a      | -1.94 | 398  | 19.84  | 159  | 10.23  |   |
| 11967 | Lmo7         | -1.94 | 39   | 1.49   | 21   | 0.77   |   |
| 11968 | Syncrip      | -1.94 | 674  | 32.58  | 308  | 16.79  |   |
| 11969 | Tgfbr2       | -1.94 | 103  | 7.07   | 37   | 3.64   |   |
| 11970 | Zfand2a      | -1.94 | 198  | 13.26  | 71   | 6.83   |   |
| 11971 | Htr2a        | -1.95 | 132  | 4.42   | 62   | 2.27   |   |
| 11972 | Gtf2f2       | -1.95 | 101  | 8.78   | 52   | 4.5    |   |
| 11973 | Morc4        | -1.95 | 103  | 3.54   | 36   | 1.81   |   |
| 11974 | Rps29_4      | -1.95 | 4    | 13.98  | 1    | 7.17   |   |
| 11975 | Scnm1        | -1.95 | 34   | 8.16   | 14   | 4.19   |   |
| 11976 | Stk38l       | -1.95 | 536  | 24.2   | 180  | 12.4   |   |
| 11977 | Rcn1         | -1.96 | 465  | 87.54  | 159  | 44.78  |   |
| 11978 | Plp2         | -1.96 | 229  | 96.21  | 98   | 49.2   |   |
| 11979 | Nolc1        | -1.96 | 469  | 31.2   | 166  | 15.95  |   |
| 11980 | Nov          | -1.96 | 4564 | 454.23 | 1576 | 232.11 |   |
| 11981 | Ccnj         | -1.96 | 0    | 2.2    | 0    | 1.12   |   |
| 11982 | Chmp4c       | -1.96 | 52   | 5.79   | 24   | 2.96   |   |
| 11983 | Phlda1       | -1.96 | 392  | 53.66  | 140  | 27.39  |   |

Supplemental Table 2  
Vehicle versus FSH, 24 hours

|       | A               | B     | C    | D      | E   | F      | G                           |
|-------|-----------------|-------|------|--------|-----|--------|-----------------------------|
| 11984 | Sertad1         | -1.96 | 190  | 35.87  | 60  | 18.31  |                             |
| 11985 | Idi1            | -1.96 | 396  | 34.84  | 144 | 17.77  |                             |
| 11986 | Swap70          | -1.96 | 160  | 8.61   | 57  | 4.39   |                             |
| 11987 | Myo1d           | -1.96 | 317  | 10.1   | 116 | 5.15   |                             |
| 11988 | Meis1           | -1.96 | 2050 | 56.8   | 680 | 28.92  |                             |
| 11989 | Sp140           | -1.97 | 190  | 9.2    | 69  | 4.68   |                             |
| 11990 | Cox18           | -1.97 | 80   | 3.72   | 36  | 1.89   |                             |
| 11991 | Mog             | -1.97 | 119  | 6.32   | 26  | 3.21   |                             |
| 11992 | Poc1a           | -1.97 | 26   | 4.51   | 12  | 2.3    |                             |
| 11993 | Dram1           | -1.97 | 21   | 1.82   | 7   | 0.92   |                             |
| 11994 | Txnrd3          | -1.97 | 25   | 1.77   | 9   | 0.9    |                             |
| 11995 | Lyar            | -1.97 | 89   | 8.81   | 44  | 4.47   |                             |
| 11996 | Pcbp4           | -1.97 | 227  | 26.12  | 81  | 13.25  |                             |
| 11997 | Csgalnact2      | -1.97 | 281  | 20.42  | 93  | 10.36  |                             |
| 11998 | Txnrdc17        | -1.97 | 129  | 22.56  | 49  | 11.43  |                             |
| 11999 | Akap1           | -1.97 | 312  | 19.42  | 114 | 9.84   |                             |
| 12000 | Zfp143          | -1.97 | 83   | 5.47   | 38  | 2.77   |                             |
| 12001 | Ybx1            | -1.98 | 253  | 249.33 | 110 | 126.15 |                             |
| 12002 | ENSRNOG00000050 | -1.98 | 56   | 8.16   | 20  | 4.13   |                             |
| 12003 | Mrpl47          | -1.98 | 47   | 5.92   | 19  | 2.99   |                             |
| 12004 | S100a16         | -1.98 | 23   | 4.96   | 8   | 2.51   |                             |
| 12005 | Tfcp2l1         | -1.98 | 101  | 3.11   | 38  | 1.57   |                             |
| 12006 | Stxbp6          | -1.98 | 125  | 4.31   | 43  | 2.18   |                             |
| 12007 | Ctnna3_1        | -1.98 | 185  | 31.25  | 59  | 15.75  |                             |
| 12008 | Strn            | -1.99 | 237  | 14.28  | 107 | 7.19   |                             |
| 12009 | Dbf4_1          | -1.99 | 6    | 3.44   | 3   | 1.73   |                             |
| 12010 | Pim1            | -1.99 | 82   | 14.96  | 29  | 7.53   |                             |
| 12011 | Mybl1           | -1.99 | 37   | 1.3    | 15  | 0.66   |                             |
| 12012 | St3gal5         | -1.99 | 1096 | 89.4   | 372 | 44.96  |                             |
| 12013 | Bmp2k           | -1.99 | 443  | 26.88  | 163 | 13.51  |                             |
| 12014 | Rad23b          | -1.99 | 1388 | 118.85 | 482 | 59.71  |                             |
| 12015 | Cspg4           | -1.99 | 293  | 8.58   | 102 | 4.3    |                             |
| 12016 | Mki67           | -2    | 387  | 9.66   | 141 | 4.84   | Genes down-regulated by FSH |
| 12017 | Wt1             | -2    | 139  | 8.56   | 45  | 4.28   |                             |
| 12018 | Kctd9           | -2    | 194  | 12.59  | 68  | 6.29   |                             |
| 12019 | Abhd10_2        | -2    | 0    | 5.57   | 0   | 2.78   |                             |
| 12020 | Ate1            | -2    | 589  | 21.65  | 205 | 10.8   |                             |
| 12021 | Atp5j2          | -2.01 | 173  | 102.28 | 59  | 50.98  |                             |
| 12022 | Stk40           | -2.01 | 378  | 22.85  | 134 | 11.38  |                             |
| 12023 | LOC103692716    | -2.01 | 30   | 93.69  | 11  | 46.6   |                             |
| 12024 | LOC100912399_1  | -2.01 | 45   | 20     | 14  | 9.95   |                             |
| 12025 | Ldlrap1         | -2.01 | 59   | 10.28  | 27  | 5.11   |                             |
| 12026 | Lgals1          | -2.01 | 828  | 374.98 | 277 | 186.41 |                             |
| 12027 | Tmem170b        | -2.01 | 82   | 10.06  | 32  | 5      |                             |
| 12028 | Tsr3            | -2.01 | 28   | 6.65   | 11  | 3.31   |                             |
| 12029 | Rasal2          | -2.01 | 232  | 6.27   | 107 | 3.11   |                             |
| 12030 | Kihl28          | -2.02 | 100  | 6.73   | 39  | 3.34   |                             |
| 12031 | AABR07002779.1  | -2.02 | 61   | 53.57  | 58  | 26.55  |                             |
| 12032 | Jmjd4           | -2.02 | 64   | 6.09   | 15  | 3.02   |                             |
| 12033 | Fabp3           | -2.02 | 287  | 87.19  | 107 | 43.18  |                             |
| 12034 | Bnip2           | -2.02 | 505  | 30.1   | 286 | 14.91  |                             |
| 12035 | Shmt2           | -2.02 | 341  | 38.79  | 119 | 19.19  |                             |
| 12036 | Slc38a4         | -2.02 | 61   | 2.92   | 25  | 1.44   |                             |

Supplemental Table 2  
Vehicle versus FSH, 24 hours

|       | A              | B     | C    | D      | E   | F      | G |
|-------|----------------|-------|------|--------|-----|--------|---|
| 12037 | Zmat3          | -2.02 | 70   | 9.13   | 23  | 4.52   |   |
| 12038 | Itpr1          | -2.02 | 2061 | 40.49  | 745 | 20.02  |   |
| 12039 | Tank           | -2.02 | 171  | 11.06  | 68  | 5.47   |   |
| 12040 | Itch           | -2.02 | 302  | 21.08  | 139 | 10.42  |   |
| 12041 | Mus81          | -2.02 | 121  | 12.14  | 49  | 6      |   |
| 12042 | Sars           | -2.02 | 593  | 70.06  | 196 | 34.61  |   |
| 12043 | Epb41l2        | -2.03 | 460  | 25.95  | 164 | 12.81  |   |
| 12044 | Aimp1          | -2.03 | 113  | 23.54  | 43  | 11.62  |   |
| 12045 | Fam102b        | -2.03 | 83   | 12.07  | 31  | 5.95   |   |
| 12046 | Yap1           | -2.03 | 715  | 87.09  | 279 | 42.89  |   |
| 12047 | Per2           | -2.03 | 74   | 2.67   | 28  | 1.31   |   |
| 12048 | Tpm3           | -2.03 | 1008 | 94.36  | 373 | 46.43  |   |
| 12049 | lfrd2          | -2.03 | 73   | 8.28   | 23  | 4.07   |   |
| 12050 | Msrb1          | -2.04 | 85   | 20.36  | 27  | 10     |   |
| 12051 | Jun            | -2.04 | 896  | 72.35  | 303 | 35.52  |   |
| 12052 | Gyg1           | -2.04 | 194  | 22.36  | 63  | 10.97  |   |
| 12053 | Mrpl17         | -2.04 | 268  | 67.15  | 95  | 32.92  |   |
| 12054 | AABR07073181.1 | -2.04 | 442  | 14.14  | 147 | 6.93   |   |
| 12055 | Anxa2          | -2.04 | 1818 | 327.03 | 629 | 159.98 |   |
| 12056 | U2af1          | -2.04 | 374  | 54.5   | 166 | 26.65  |   |
| 12057 | Zfpm2          | -2.05 | 1223 | 24.51  | 451 | 11.98  |   |
| 12058 | Pde7a          | -2.05 | 216  | 8.22   | 70  | 4.02   |   |
| 12059 | Tob2           | -2.05 | 124  | 11.55  | 47  | 5.65   |   |
| 12060 | Dkk3           | -2.05 | 810  | 37.55  | 263 | 18.36  |   |
| 12061 | Gale           | -2.05 | 159  | 25.49  | 51  | 12.43  |   |
| 12062 | Ddx42          | -2.05 | 1155 | 58.86  | 413 | 28.66  |   |
| 12063 | Utrn           | -2.06 | 896  | 13.09  | 365 | 6.37   |   |
| 12064 | Ccnd3          | -2.06 | 219  | 29.21  | 78  | 14.21  |   |
| 12065 | Rpl23a         | -2.06 | 280  | 379.05 | 121 | 184.24 |   |
| 12066 | Tubb2a         | -2.06 | 407  | 58.53  | 133 | 28.44  |   |
| 12067 | AABR07024457.1 | -2.06 | 12   | 0.84   | 4   | 0.41   |   |
| 12068 | AABR07027854.1 | -2.06 | 4    | 2.7    | 3   | 1.31   |   |
| 12069 | AABR07028795.1 | -2.06 | 6    | 6.64   | 4   | 3.22   |   |
| 12070 | AABR07032255.2 | -2.06 | 0    | 1.72   | 0   | 0.83   |   |
| 12071 | AABR07061385.2 | -2.06 | 3    | 2.01   | 1   | 0.97   |   |
| 12072 | AABR07066144.1 | -2.06 | 2    | 1.63   | 0   | 0.79   |   |
| 12073 | AC130232.1     | -2.06 | 0    | 2.37   | 0   | 1.15   |   |
| 12074 | Acyp1          | -2.06 | 23   | 4.26   | 6   | 2.06   |   |
| 12075 | Cebpzpos       | -2.06 | 3    | 3.08   | 1   | 1.49   |   |
| 12076 | Celf3          | -2.06 | 12   | 0.53   | 8   | 0.25   |   |
| 12077 | Elovl2         | -2.06 | 4    | 0.2    | 1   | 0.1    |   |
| 12078 | Fam109a        | -2.06 | 3    | 1.06   | 1   | 0.51   |   |
| 12079 | Fam131a_1      | -2.06 | 0    | 0.21   | 0   | 0.1    |   |
| 12080 | Fam203a        | -2.06 | 66   | 6.95   | 24  | 3.37   |   |
| 12081 | Fam213b        | -2.06 | 7    | 1.7    | 1   | 0.83   |   |
| 12082 | Gnb3           | -2.06 | 6    | 0.43   | 4   | 0.21   |   |
| 12083 | Gng3           | -2.06 | 6    | 1.3    | 2   | 0.63   |   |
| 12084 | Hhip           | -2.06 | 5    | 0.27   | 3   | 0.13   |   |
| 12085 | Hist1h4b_1     | -2.06 | 3    | 1.89   | 1   | 0.91   |   |
| 12086 | Ikzf2          | -2.06 | 18   | 0.34   | 32  | 0.17   |   |
| 12087 | Irx2           | -2.06 | 12   | 1.57   | 4   | 0.76   |   |
| 12088 | Kif1a          | -2.06 | 54   | 1.96   | 18  | 0.95   |   |
| 12089 | Lin52          | -2.06 | 11   | 7.63   | 6   | 3.69   |   |
| 12090 | LOC100360274   | -2.06 | 266  | 0.71   | 102 | 0.35   |   |



Supplemental Table 2  
Vehicle versus FSH, 24 hours

|       | A              | B     | C   | D     | E  | F     | G |
|-------|----------------|-------|-----|-------|----|-------|---|
| 12091 | LOC102547059   | -2.06 | 0   | 0.11  | 0  | 0.05  |   |
| 12092 | LOC685596      | -2.06 | 0   | 6.29  | 0  | 3.05  |   |
| 12093 | Mansc1         | -2.06 | 13  | 1.31  | 5  | 0.63  |   |
| 12094 | Nefm           | -2.06 | 11  | 0.98  | 4  | 0.47  |   |
| 12095 | Npr1           | -2.06 | 4   | 0.18  | 1  | 0.09  |   |
| 12096 | Ntm            | -2.06 | 12  | 0.23  | 4  | 0.11  |   |
| 12097 | Pcdhb15        | -2.06 | 3   | 0.32  | 1  | 0.15  |   |
| 12098 | Pde2a          | -2.06 | 5   | 0.17  | 2  | 0.08  |   |
| 12099 | Phyhd1         | -2.06 | 84  | 10.07 | 28 | 4.88  |   |
| 12100 | Ppfia3         | -2.06 | 6   | 0.3   | 4  | 0.15  |   |
| 12101 | Rab44          | -2.06 | 4   | 0.34  | 2  | 0.17  |   |
| 12102 | Ramp1          | -2.06 | 110 | 27.75 | 39 | 13.44 |   |
| 12103 | RGD1560784     | -2.06 | 3   | 0.75  | 1  | 0.36  |   |
| 12104 | RGD1564370     | -2.06 | 0   | 1.87  | 0  | 0.9   |   |
| 12105 | RGD1566369     | -2.06 | 1   | 1.19  | 0  | 0.58  |   |
| 12106 | Rn60_2_1764.2  | -2.06 | 8   | 0.68  | 2  | 0.33  |   |
| 12107 | Rps191l        | -2.06 | 1   | 1.59  | 0  | 0.77  |   |
| 12108 | Scn3a          | -2.06 | 4   | 0.22  | 2  | 0.11  |   |
| 12109 | Sdhaf3         | -2.06 | 8   | 1.47  | 10 | 0.71  |   |
| 12110 | Slc16a10       | -2.06 | 6   | 0.28  | 8  | 0.14  |   |
| 12111 | Slc35d2        | -2.06 | 67  | 3.76  | 40 | 1.82  |   |
| 12112 | Slc35f2        | -2.06 | 4   | 0.27  | 3  | 0.13  |   |
| 12113 | Spata31d1d     | -2.06 | 3   | 0.19  | 1  | 0.09  |   |
| 12114 | Tjp3           | -2.06 | 11  | 0.33  | 6  | 0.16  |   |
| 12115 | Tmem202        | -2.06 | 7   | 0.58  | 3  | 0.28  |   |
| 12116 | Tnfaip8l1      | -2.06 | 3   | 1.33  | 1  | 0.65  |   |
| 12117 | Trim15         | -2.06 | 19  | 1.04  | 12 | 0.5   |   |
| 12118 | Trmt11         | -2.06 | 56  | 4.29  | 25 | 2.08  |   |
| 12119 | Ube3d          | -2.06 | 73  | 2.42  | 47 | 1.17  |   |
| 12120 | Ubxn11         | -2.06 | 8   | 0.41  | 3  | 0.2   |   |
| 12121 | Zbtb16         | -2.06 | 11  | 0.28  | 9  | 0.14  |   |
| 12122 | Zc3hav1l       | -2.06 | 8   | 1.66  | 3  | 0.8   |   |
| 12123 | Zfp423         | -2.06 | 10  | 0.16  | 11 | 0.08  |   |
| 12124 | Zfp455         | -2.06 | 1   | 0.25  | 1  | 0.12  |   |
| 12125 | Zfp483         | -2.06 | 4   | 0.34  | 1  | 0.16  |   |
| 12126 | AABR07006889.1 | -2.06 | 3   | 0.36  | 1  | 0.18  |   |
| 12127 | AABR07009834.1 | -2.06 | 3   | 2.22  | 1  | 1.08  |   |
| 12128 | AABR07013776.1 | -2.06 | 5   | 3.37  | 2  | 1.63  |   |
| 12129 | AABR07017145.1 | -2.06 | 7   | 0.37  | 9  | 0.18  |   |
| 12130 | AABR07021220.1 | -2.06 | 1   | 0.58  | 0  | 0.28  |   |
| 12131 | AABR07044080.2 | -2.06 | 9   | 3.19  | 6  | 1.55  |   |
| 12132 | AABR07048280.1 | -2.06 | 0   | 1.27  | 0  | 0.62  |   |
| 12133 | AABR07053188.1 | -2.06 | 0   | 2.24  | 0  | 1.09  |   |
| 12134 | AABR07055191.1 | -2.06 | 28  | 0.9   | 16 | 0.43  |   |
| 12135 | AABR07065493.1 | -2.06 | 0   | 0.65  | 0  | 0.32  |   |
| 12136 | AABR07068587.1 | -2.06 | 7   | 4.15  | 2  | 2.01  |   |
| 12137 | AABR07072371.1 | -2.06 | 0   | 0.87  | 0  | 0.42  |   |
| 12138 | AC099294.1     | -2.06 | 0   | 2.99  | 0  | 1.45  |   |
| 12139 | AC103090.1     | -2.06 | 2   | 5.42  | 1  | 2.62  |   |
| 12140 | AC136661.1     | -2.06 | 0   | 2.24  | 0  | 1.09  |   |
| 12141 | Aebp1          | -2.06 | 13  | 0.78  | 5  | 0.38  |   |
| 12142 | Arl14ep        | -2.06 | 122 | 13.62 | 47 | 6.6   |   |
| 12143 | Aunip          | -2.06 | 11  | 1.14  | 11 | 0.55  |   |
| 12144 | Ccdc122        | -2.06 | 10  | 0.49  | 6  | 0.24  |   |

Supplemental Table 2  
Vehicle versus FSH, 24 hours

|       | A              | B     | C   | D     | E  | F     | G |
|-------|----------------|-------|-----|-------|----|-------|---|
| 12145 | Ccdc57         | -2.06 | 66  | 1.23  | 57 | 0.59  |   |
| 12146 | Cenpq          | -2.06 | 3   | 0.92  | 2  | 0.44  |   |
| 12147 | Cenpu          | -2.06 | 32  | 1.81  | 21 | 0.88  |   |
| 12148 | Cgref1         | -2.06 | 10  | 1.68  | 5  | 0.82  |   |
| 12149 | Chrm2          | -2.06 | 3   | 0.34  | 1  | 0.17  |   |
| 12150 | Cib2           | -2.06 | 6   | 0.53  | 5  | 0.26  |   |
| 12151 | Cklf           | -2.06 | 4   | 1.12  | 4  | 0.54  |   |
| 12152 | Cmya5          | -2.06 | 5   | 0.06  | 5  | 0.03  |   |
| 12153 | Cntn4          | -2.06 | 19  | 0.15  | 10 | 0.07  |   |
| 12154 | Col20a1        | -2.06 | 15  | 0.17  | 15 | 0.08  |   |
| 12155 | Des            | -2.06 | 3   | 0.34  | 1  | 0.17  |   |
| 12156 | Dscc1          | -2.06 | 33  | 2.83  | 18 | 1.37  |   |
| 12157 | Ears2_2        | -2.06 | 3   | 1.43  | 2  | 0.69  |   |
| 12158 | Fam174b        | -2.06 | 13  | 0.91  | 6  | 0.44  |   |
| 12159 | Fez1           | -2.06 | 6   | 0.44  | 5  | 0.22  |   |
| 12160 | Fgf9           | -2.06 | 9   | 0.75  | 9  | 0.36  |   |
| 12161 | Fkbp6          | -2.06 | 5   | 0.53  | 5  | 0.25  |   |
| 12162 | Gnas_1         | -2.06 | 8   | 1.83  | 2  | 0.88  |   |
| 12163 | Hist1h3a       | -2.06 | 1   | 1.82  | 1  | 0.88  |   |
| 12164 | Hspa12b        | -2.06 | 13  | 0.63  | 6  | 0.3   |   |
| 12165 | Inpp5j         | -2.06 | 4   | 0.22  | 2  | 0.11  |   |
| 12166 | Irga11         | -2.06 | 288 | 14.57 | 97 | 7.06  |   |
| 12167 | Jazf1          | -2.06 | 94  | 8.2   | 55 | 3.97  |   |
| 12168 | Klk13          | -2.06 | 3   | 0.72  | 1  | 0.35  |   |
| 12169 | Lgi2           | -2.06 | 7   | 0.25  | 3  | 0.12  |   |
| 12170 | LOC100909526   | -2.06 | 0   | 1.49  | 0  | 0.72  |   |
| 12171 | LOC100910255_1 | -2.06 | 0   | 0.14  | 0  | 0.07  |   |
| 12172 | LOC680200      | -2.06 | 24  | 1.89  | 12 | 0.92  |   |
| 12173 | LOC685067      | -2.06 | 3   | 0.4   | 1  | 0.19  |   |
| 12174 | LOC691113      | -2.06 | 4   | 1.67  | 2  | 0.81  |   |
| 12175 | Loxl1          | -2.06 | 12  | 0.54  | 3  | 0.26  |   |
| 12176 | Lym5           | -2.06 | 6   | 5.73  | 2  | 2.77  |   |
| 12177 | Mical1         | -2.06 | 251 | 15.22 | 79 | 7.37  |   |
| 12178 | Mnd1           | -2.06 | 4   | 1.22  | 6  | 0.59  |   |
| 12179 | Msl3l2         | -2.06 | 0   | 0.49  | 0  | 0.24  |   |
| 12180 | Nek3           | -2.06 | 27  | 0.88  | 13 | 0.43  |   |
| 12181 | Nxph3          | -2.06 | 9   | 1.21  | 3  | 0.58  |   |
| 12182 | Ogn_2          | -2.06 | 0   | 0.83  | 0  | 0.4   |   |
| 12183 | P2rx5          | -2.06 | 8   | 0.25  | 2  | 0.12  |   |
| 12184 | Paqr8          | -2.06 | 60  | 8.88  | 21 | 4.3   |   |
| 12185 | Pdcd5          | -2.06 | 0   | 14.79 | 0  | 7.16  |   |
| 12186 | Pif1           | -2.06 | 7   | 0.78  | 4  | 0.38  |   |
| 12187 | Plac9          | -2.06 | 10  | 1.58  | 4  | 0.76  |   |
| 12188 | Plaur          | -2.06 | 29  | 5.1   | 7  | 2.47  |   |
| 12189 | Pnpla3         | -2.06 | 4   | 0.23  | 2  | 0.11  |   |
| 12190 | Ppm1j          | -2.06 | 3   | 0.35  | 1  | 0.17  |   |
| 12191 | Prrg4          | -2.06 | 3   | 0.4   | 1  | 0.19  |   |
| 12192 | Rexo2          | -2.06 | 307 | 45.08 | 90 | 21.83 |   |
| 12193 | RGD1559955     | -2.06 | 1   | 18.32 | 0  | 8.87  |   |
| 12194 | RGD1564883     | -2.06 | 3   | 7.29  | 0  | 3.53  |   |
| 12195 | Rn60_X_0711.1  | -2.06 | 3   | 1.17  | 1  | 0.57  |   |
| 12196 | Rnf151         | -2.06 | 3   | 0.64  | 1  | 0.31  |   |
| 12197 | Rnf180         | -2.06 | 21  | 1.26  | 14 | 0.61  |   |
| 12198 | Satb2          | -2.06 | 10  | 0.12  | 6  | 0.06  |   |

Supplemental Table 2  
Vehicle versus FSH, 24 hours

|       | A            | B     | C    | D      | E    | F      | G |
|-------|--------------|-------|------|--------|------|--------|---|
| 12199 | Scin         | -2.06 | 6    | 0.35   | 3    | 0.17   |   |
| 12200 | Sdk2         | -2.06 | 14   | 0.1    | 7    | 0.05   |   |
| 12201 | Sec31b       | -2.06 | 3    | 0.16   | 3    | 0.08   |   |
| 12202 | Sh3rf3       | -2.06 | 6    | 0.36   | 4    | 0.17   |   |
| 12203 | Smagp        | -2.06 | 13   | 1      | 5    | 0.48   |   |
| 12204 | Sptlc3       | -2.06 | 10   | 0.24   | 6    | 0.12   |   |
| 12205 | Sstr2        | -2.06 | 4    | 0.36   | 1    | 0.17   |   |
| 12206 | Syt9         | -2.06 | 18   | 0.99   | 5    | 0.48   |   |
| 12207 | Tex14        | -2.06 | 169  | 0.78   | 104  | 0.38   |   |
| 12208 | Tyw3         | -2.06 | 44   | 4.97   | 30   | 2.41   |   |
| 12209 | Usp50        | -2.06 | 15   | 0.47   | 27   | 0.23   |   |
| 12210 | Vmac         | -2.06 | 7    | 2.9    | 2    | 1.4    |   |
| 12211 | Zfp951_1     | -2.06 | 0    | 0.61   | 0    | 0.29   |   |
| 12212 | Lipa         | -2.07 | 2502 | 173.99 | 813  | 84.17  |   |
| 12213 | Map7d1       | -2.07 | 592  | 40.44  | 203  | 19.51  |   |
| 12214 | Rsu1         | -2.08 | 267  | 44.38  | 107  | 21.35  |   |
| 12215 | LOC100362432 | -2.08 | 136  | 31.49  | 55   | 15.14  |   |
| 12216 | Aida         | -2.08 | 304  | 23.68  | 124  | 11.38  |   |
| 12217 | Dcbld2       | -2.08 | 507  | 39.85  | 158  | 19.15  |   |
| 12218 | Mphosph10    | -2.08 | 130  | 13.01  | 45   | 6.25   |   |
| 12219 | Chmp3        | -2.09 | 149  | 29.8   | 59   | 14.29  |   |
| 12220 | Bag2         | -2.09 | 115  | 13.63  | 35   | 6.52   |   |
| 12221 | Srgap2       | -2.09 | 428  | 16.29  | 164  | 7.78   |   |
| 12222 | Romo1        | -2.09 | 50   | 43.17  | 17   | 20.61  |   |
| 12223 | Slc25a25     | -2.1  | 147  | 10.89  | 50   | 5.2    |   |
| 12224 | Ptrf         | -2.1  | 3925 | 303.65 | 1292 | 144.9  |   |
| 12225 | Cox17        | -2.1  | 75   | 37.79  | 26   | 18.02  |   |
| 12226 | Cltb         | -2.1  | 152  | 27.61  | 47   | 13.14  |   |
| 12227 | Fam117a      | -2.1  | 99   | 5.07   | 37   | 2.41   |   |
| 12228 | Rps18        | -2.1  | 64   | 562.81 | 18   | 267.58 |   |
| 12229 | Myo19        | -2.1  | 136  | 6.6    | 55   | 3.14   |   |
| 12230 | Cttnbp2nl    | -2.11 | 401  | 18.6   | 134  | 8.83   |   |
| 12231 | RGD1559896   | -2.11 | 1226 | 97.13  | 401  | 46.12  |   |
| 12232 | Usp13        | -2.11 | 299  | 8.29   | 98   | 3.94   |   |
| 12233 | AC098459.1   | -2.11 | 30   | 17.17  | 9    | 8.15   |   |
| 12234 | LOC100909544 | -2.11 | 1    | 3.61   | 0    | 1.71   |   |
| 12235 | Snf8         | -2.11 | 130  | 27.19  | 44   | 12.9   |   |
| 12236 | Tlk1_1       | -2.11 | 27   | 11.82  | 7    | 5.61   |   |
| 12237 | Sesn2        | -2.11 | 208  | 12.66  | 68   | 6      |   |
| 12238 | Pkmyt1       | -2.11 | 32   | 3.96   | 11   | 1.88   |   |
| 12239 | Snx24        | -2.11 | 125  | 5.24   | 53   | 2.48   |   |
| 12240 | LOC679739    | -2.11 | 1    | 16.77  | 0    | 7.93   |   |
| 12241 | Piezo1       | -2.11 | 45   | 1.31   | 15   | 0.62   |   |
| 12242 | Kif20b       | -2.11 | 45   | 1.96   | 21   | 0.93   |   |
| 12243 | Tmsb10_1     | -2.11 | 1468 | 769.15 | 473  | 363.85 |   |
| 12244 | Map4         | -2.11 | 1826 | 46.33  | 611  | 21.92  |   |
| 12245 | Abl2         | -2.11 | 416  | 8.34   | 210  | 3.94   |   |
| 12246 | Tmtc1        | -2.12 | 82   | 3.24   | 28   | 1.53   |   |
| 12247 | Ndufa4       | -2.12 | 252  | 74.27  | 81   | 35.05  |   |
| 12248 | Picalm       | -2.12 | 1037 | 88.93  | 399  | 41.96  |   |
| 12249 | Col4a5       | -2.12 | 1466 | 51.76  | 470  | 24.42  |   |
| 12250 | Hectd2       | -2.12 | 63   | 1.82   | 25   | 0.86   |   |
| 12251 | Naa38        | -2.12 | 56   | 25.93  | 23   | 12.22  |   |
| 12252 | Unc13b       | -2.12 | 55   | 1      | 33   | 0.47   |   |

Supplemental Table 2  
Vehicle versus FSH, 24 hours

|       | A              | B     | C     | D      | E    | F      | G |
|-------|----------------|-------|-------|--------|------|--------|---|
| 12253 | Ncald          | -2.12 | 117   | 5.25   | 41   | 2.47   |   |
| 12254 | Cast           | -2.13 | 954   | 33.82  | 589  | 15.91  |   |
| 12255 | G6pc_1         | -2.13 | 13    | 16.47  | 4    | 7.75   |   |
| 12256 | lsg15          | -2.13 | 35    | 6.45   | 11   | 3.03   |   |
| 12257 | Ldlrad4        | -2.13 | 151   | 3.89   | 106  | 1.83   |   |
| 12258 | Tlr5           | -2.13 | 126   | 7.44   | 41   | 3.49   |   |
| 12259 | Coq7           | -2.13 | 44    | 8.44   | 15   | 3.96   |   |
| 12260 | Acsl5          | -2.13 | 203   | 15.74  | 65   | 7.38   |   |
| 12261 | Brca1          | -2.14 | 112   | 3.37   | 42   | 1.58   |   |
| 12262 | Dynll1         | -2.14 | 726   | 284.71 | 222  | 133.28 |   |
| 12263 | Fkbp1a         | -2.14 | 1034  | 158.12 | 336  | 74.01  |   |
| 12264 | App1           | -2.14 | 127   | 11.94  | 47   | 5.58   |   |
| 12265 | Axin2          | -2.14 | 30    | 1.75   | 12   | 0.82   |   |
| 12266 | Myo9b          | -2.14 | 896   | 24.92  | 292  | 11.64  |   |
| 12267 | Ptpn21         | -2.14 | 454   | 18.48  | 157  | 8.62   |   |
| 12268 | Abrac1         | -2.15 | 448   | 109.97 | 134  | 51.14  |   |
| 12269 | Gmds           | -2.15 | 107   | 4.25   | 54   | 1.98   |   |
| 12270 | Xk             | -2.15 | 31    | 1.23   | 12   | 0.57   |   |
| 12271 | Mrps9          | -2.16 | 163   | 20.62  | 61   | 9.56   |   |
| 12272 | Cdipt          | -2.16 | 296   | 39.45  | 95   | 18.27  |   |
| 12273 | Mgat1          | -2.16 | 877   | 76     | 271  | 35.19  |   |
| 12274 | Arhgap28       | -2.16 | 121   | 5.64   | 51   | 2.61   |   |
| 12275 | LOC100911453   | -2.16 | 0     | 6.64   | 0    | 3.07   |   |
| 12276 | LOC679582      | -2.16 | 40    | 2.51   | 19   | 1.16   |   |
| 12277 | Timm8a1_2      | -2.16 | 38    | 23.23  | 14   | 10.74  |   |
| 12278 | Wnt5b          | -2.16 | 30    | 2.13   | 9    | 0.98   |   |
| 12279 | AABR07054332.1 | -2.16 | 0     | 5.89   | 0    | 2.73   |   |
| 12280 | Zfp238         | -2.17 | 258   | 40.97  | 82   | 18.92  |   |
| 12281 | LOC100911572_1 | -2.17 | 493   | 24.35  | 155  | 11.23  |   |
| 12282 | LOC100911361   | -2.17 | 42    | 10.63  | 13   | 4.9    |   |
| 12283 | Ankh           | -2.17 | 82    | 6.39   | 32   | 2.95   |   |
| 12284 | Klf7_1         | -2.17 | 85    | 7.87   | 29   | 3.63   |   |
| 12285 | Sema4g         | -2.17 | 42    | 2.36   | 13   | 1.09   |   |
| 12286 | LOC100911319_1 | -2.17 | 261   | 25.14  | 81   | 11.56  |   |
| 12287 | Heatr3         | -2.18 | 180   | 8.61   | 55   | 3.96   |   |
| 12288 | Cacng4         | -2.18 | 26    | 1.21   | 12   | 0.55   |   |
| 12289 | Grk4           | -2.18 | 67    | 2.23   | 54   | 1.03   |   |
| 12290 | Mcur1          | -2.18 | 20    | 4.68   | 11   | 2.15   |   |
| 12291 | Rps6ka2        | -2.18 | 68    | 2.63   | 26   | 1.21   |   |
| 12292 | Cfdp1          | -2.18 | 552   | 29.15  | 201  | 13.37  |   |
| 12293 | Ndufb5         | -2.18 | 301   | 59.59  | 98   | 27.27  |   |
| 12294 | Ttk            | -2.19 | 67    | 3.98   | 25   | 1.82   |   |
| 12295 | Psph           | -2.19 | 94    | 18.03  | 34   | 8.24   |   |
| 12296 | Lamb1          | -2.19 | 1238  | 52.48  | 390  | 23.99  |   |
| 12297 | Wdr47          | -2.19 | 157   | 7.53   | 54   | 3.44   |   |
| 12298 | Trip10         | -2.19 | 218   | 26.81  | 85   | 12.25  |   |
| 12299 | RGD1566359     | -2.19 | 86    | 37.59  | 27   | 17.15  |   |
| 12300 | Fchsd1         | -2.19 | 126   | 6.98   | 41   | 3.18   |   |
| 12301 | Lmnb2          | -2.2  | 97    | 10.01  | 30   | 4.55   |   |
| 12302 | Pam            | -2.2  | 14646 | 689.68 | 4530 | 313.92 |   |
| 12303 | Fam49a         | -2.2  | 200   | 6.97   | 64   | 3.17   |   |
| 12304 | Ubap2          | -2.2  | 1017  | 56.96  | 333  | 25.89  |   |
| 12305 | Cxcl12         | -2.2  | 32    | 0.74   | 15   | 0.33   |   |
| 12306 | Fsip1          | -2.2  | 20    | 2.4    | 11   | 1.09   |   |

Supplemental Table 2  
Vehicle versus FSH, 24 hours

|       | A              | B     | C    | D      | E    | F     | G |
|-------|----------------|-------|------|--------|------|-------|---|
| 12307 | Gan            | -2.2  | 67   | 4.38   | 24   | 1.99  |   |
| 12308 | Mrfap1_1       | -2.2  | 3    | 0.92   | 1    | 0.42  |   |
| 12309 | Rell2          | -2.2  | 11   | 2.3    | 3    | 1.04  |   |
| 12310 | RGD1560225     | -2.2  | 61   | 1.81   | 15   | 0.82  |   |
| 12311 | Ascc3          | -2.2  | 509  | 13.18  | 179  | 5.98  |   |
| 12312 | Map1s          | -2.21 | 320  | 17.53  | 101  | 7.95  |   |
| 12313 | Dnajc21        | -2.21 | 81   | 10.23  | 27   | 4.63  |   |
| 12314 | Pik3r1         | -2.21 | 659  | 32.33  | 261  | 14.64 |   |
| 12315 | Irs2           | -2.21 | 889  | 30.51  | 265  | 13.81 |   |
| 12316 | Stam2          | -2.21 | 193  | 17.86  | 72   | 8.08  |   |
| 12317 | Kcnd3          | -2.21 | 83   | 1.64   | 24   | 0.74  |   |
| 12318 | Cdc27          | -2.21 | 565  | 36.89  | 195  | 16.67 |   |
| 12319 | AABR07053749.1 | -2.21 | 100  | 33.39  | 34   | 15.09 |   |
| 12320 | Eno2           | -2.21 | 1    | 8.23   | 0    | 3.72  |   |
| 12321 | MGC109340_1    | -2.22 | 70   | 33.81  | 27   | 15.27 |   |
| 12322 | Rab30          | -2.22 | 148  | 9.02   | 40   | 4.07  |   |
| 12323 | Wtip           | -2.22 | 95   | 12.64  | 40   | 5.7   |   |
| 12324 | Syt1           | -2.22 | 283  | 3.95   | 89   | 1.78  |   |
| 12325 | Pde5a          | -2.22 | 69   | 3.08   | 34   | 1.39  |   |
| 12326 | Akt3           | -2.22 | 194  | 17.16  | 91   | 7.72  |   |
| 12327 | Grb14          | -2.23 | 2721 | 277.06 | 909  | 124.5 |   |
| 12328 | Pcsk6          | -2.23 | 87   | 4.08   | 30   | 1.83  |   |
| 12329 | Iqgap1         | -2.23 | 1796 | 70.7   | 572  | 31.72 |   |
| 12330 | Lrnf4          | -2.23 | 14   | 8.52   | 7    | 3.82  |   |
| 12331 | Ryr2           | -2.23 | 413  | 4.74   | 138  | 2.13  |   |
| 12332 | Ost4           | -2.23 | 206  | 86.35  | 64   | 38.7  |   |
| 12333 | Uqcrq          | -2.23 | 208  | 33.02  | 63   | 14.78 |   |
| 12334 | Zfp54          | -2.24 | 16   | 1.56   | 10   | 0.7   |   |
| 12335 | Arl10          | -2.24 | 88   | 12.41  | 34   | 5.55  |   |
| 12336 | Cox10          | -2.24 | 113  | 6.74   | 47   | 3.01  |   |
| 12337 | Thoc6          | -2.24 | 93   | 20.11  | 28   | 8.99  |   |
| 12338 | Plekhh1        | -2.24 | 183  | 6.52   | 69   | 2.91  |   |
| 12339 | LOC100911874_2 | -2.24 | 106  | 16.55  | 39   | 7.38  |   |
| 12340 | Phex           | -2.24 | 287  | 17.12  | 99   | 7.64  |   |
| 12341 | Ostf1          | -2.24 | 104  | 18.68  | 35   | 8.33  |   |
| 12342 | Alyref         | -2.24 | 238  | 44.42  | 76   | 19.8  |   |
| 12343 | LOC100912375   | -2.25 | 1    | 36.38  | 0    | 16.19 |   |
| 12344 | Ppp1r12a       | -2.25 | 1408 | 44.17  | 475  | 19.65 |   |
| 12345 | Rpe            | -2.25 | 128  | 10.28  | 48   | 4.56  |   |
| 12346 | Snurf          | -2.25 | 14   | 12.23  | 3    | 5.43  |   |
| 12347 | Gls            | -2.25 | 5483 | 131.84 | 1592 | 58.51 |   |
| 12348 | Pkia           | -2.25 | 165  | 16.56  | 60   | 7.35  |   |
| 12349 | Bicd2          | -2.25 | 528  | 19.23  | 166  | 8.53  |   |
| 12350 | Lgals3         | -2.26 | 118  | 24.09  | 41   | 10.67 |   |
| 12351 | AC103574.4     | -2.26 | 39   | 41.53  | 22   | 18.37 |   |
| 12352 | Cdca7          | -2.26 | 48   | 4.92   | 13   | 2.18  |   |
| 12353 | Esyt2          | -2.26 | 392  | 27.1   | 115  | 11.98 |   |
| 12354 | Ctnna3_2       | -2.26 | 194  | 43.13  | 58   | 19.06 |   |
| 12355 | Zfp608         | -2.27 | 230  | 6.89   | 69   | 3.04  |   |
| 12356 | Slc8a1         | -2.27 | 425  | 16.58  | 124  | 7.31  |   |
| 12357 | Mpp6           | -2.27 | 183  | 10.3   | 58   | 4.53  |   |
| 12358 | Sacs           | -2.27 | 386  | 5.64   | 117  | 2.48  |   |
| 12359 | AABR07002774.1 | -2.28 | 34   | 4.02   | 16   | 1.77  |   |
| 12360 | Cacna2d1       | -2.28 | 554  | 16.42  | 247  | 7.21  |   |

Supplemental Table 2  
Vehicle versus FSH, 24 hours

|       | A              | B     | C    | D      | E   | F      | G |
|-------|----------------|-------|------|--------|-----|--------|---|
| 12361 | Telo2          | -2.28 | 320  | 20.74  | 113 | 9.1    |   |
| 12362 | Sept11         | -2.28 | 2076 | 84.21  | 672 | 36.96  |   |
| 12363 | Dot1l          | -2.28 | 789  | 23.32  | 238 | 10.23  |   |
| 12364 | AABR07008377.1 | -2.28 | 18   | 33.98  | 4   | 14.89  |   |
| 12365 | Tubb2b         | -2.28 | 982  | 251.38 | 288 | 110.03 |   |
| 12366 | Ptma_2         | -2.29 | 25   | 33.5   | 11  | 14.65  |   |
| 12367 | Schip1         | -2.29 | 218  | 11.51  | 58  | 5.04   |   |
| 12368 | Emp1           | -2.29 | 1328 | 113.08 | 394 | 49.44  |   |
| 12369 | Atp6v1f        | -2.29 | 152  | 59.29  | 47  | 25.9   |   |
| 12370 | Dusp3          | -2.29 | 390  | 20.61  | 114 | 8.99   |   |
| 12371 | AABR07054262.2 | -2.29 | 10   | 1.47   | 3   | 0.64   |   |
| 12372 | Ocln           | -2.29 | 12   | 0.58   | 5   | 0.25   |   |
| 12373 | AABR07054554.1 | -2.29 | 11   | 2.23   | 3   | 0.97   |   |
| 12374 | AABR07058886.1 | -2.29 | 171  | 32.28  | 53  | 14.07  |   |
| 12375 | Ccdc167        | -2.29 | 28   | 2.74   | 17  | 1.19   |   |
| 12376 | Cd46           | -2.29 | 20   | 2.09   | 11  | 0.91   |   |
| 12377 | Dnajc17        | -2.29 | 49   | 5.03   | 25  | 2.19   |   |
| 12378 | Dnph1          | -2.29 | 10   | 3.22   | 4   | 1.41   |   |
| 12379 | Epb41l4a       | -2.29 | 116  | 7.22   | 49  | 3.15   |   |
| 12380 | Fsd1l          | -2.29 | 35   | 1.34   | 19  | 0.58   |   |
| 12381 | Hmgn5b         | -2.29 | 0    | 1.23   | 1   | 0.53   |   |
| 12382 | Lif            | -2.29 | 11   | 1.12   | 3   | 0.49   |   |
| 12383 | LOC102553962   | -2.29 | 11   | 1.93   | 5   | 0.84   |   |
| 12384 | Rn60_4_1636.2  | -2.29 | 10   | 2.81   | 3   | 1.23   |   |
| 12385 | Rpl39_5        | -2.29 | 0    | 31.94  | 0   | 13.93  |   |
| 12386 | Scarf2         | -2.29 | 75   | 4.51   | 23  | 1.97   |   |
| 12387 | Selm           | -2.29 | 20   | 7.38   | 9   | 3.22   |   |
| 12388 | Ten1           | -2.29 | 34   | 8.55   | 14  | 3.73   |   |
| 12389 | Nars           | -2.3  | 663  | 61.24  | 200 | 26.66  |   |
| 12390 | Cdc42bpa       | -2.3  | 517  | 15.32  | 186 | 6.66   |   |
| 12391 | Smarca1        | -2.3  | 164  | 7.38   | 50  | 3.21   |   |
| 12392 | Rusc2          | -2.3  | 719  | 38.3   | 225 | 16.63  |   |
| 12393 | Enah           | -2.31 | 722  | 51.13  | 257 | 22.17  |   |
| 12394 | Terf1          | -2.31 | 148  | 5.79   | 63  | 2.51   |   |
| 12395 | Haus8          | -2.31 | 115  | 7.99   | 35  | 3.46   |   |
| 12396 | Sept7          | -2.31 | 326  | 47.91  | 118 | 20.73  |   |
| 12397 | Gpr161         | -2.31 | 65   | 4.33   | 21  | 1.87   |   |
| 12398 | Scn9a          | -2.31 | 43   | 0.99   | 15  | 0.43   |   |
| 12399 | Hook3          | -2.32 | 518  | 10.65  | 294 | 4.59   |   |
| 12400 | Lrrcc1         | -2.32 | 120  | 6.42   | 55  | 2.77   |   |
| 12401 | Lurap1l        | -2.32 | 35   | 5.87   | 30  | 2.53   |   |
| 12402 | Gmfg           | -2.32 | 34   | 11.87  | 11  | 5.11   |   |
| 12403 | Rps10_1        | -2.32 | 59   | 94.56  | 18  | 40.71  |   |
| 12404 | Zfp641         | -2.32 | 28   | 3.24   | 10  | 1.39   |   |
| 12405 | Cacul1         | -2.33 | 509  | 26.64  | 151 | 11.45  |   |
| 12406 | Urb2           | -2.34 | 147  | 5.29   | 40  | 2.26   |   |
| 12407 | Ltbp4          | -2.34 | 18   | 0.79   | 6   | 0.34   |   |
| 12408 | Snx10          | -2.34 | 38   | 3.03   | 18  | 1.3    |   |
| 12409 | Gtdc1          | -2.34 | 85   | 3.77   | 65  | 1.61   |   |
| 12410 | LOC100365556   | -2.34 | 114  | 2.64   | 52  | 1.13   |   |
| 12411 | Rab9a          | -2.34 | 85   | 13.32  | 36  | 5.69   |   |
| 12412 | Rps28_1        | -2.34 | 86   | 162.44 | 33  | 69.42  |   |
| 12413 | Testin         | -2.34 | 52   | 9.32   | 16  | 3.98   |   |
| 12414 | Sept8          | -2.34 | 583  | 23.57  | 165 | 10.06  |   |

Supplemental Table 2  
Vehicle versus FSH, 24 hours

|       | A              | B     | C    | D      | E   | F      | G |
|-------|----------------|-------|------|--------|-----|--------|---|
| 12415 | Bbs7           | -2.34 | 140  | 9.4    | 54  | 4.01   |   |
| 12416 | Nagk           | -2.34 | 146  | 18.25  | 44  | 7.79   |   |
| 12417 | Lpl            | -2.35 | 101  | 6.72   | 29  | 2.86   |   |
| 12418 | Bcr            | -2.36 | 561  | 29.85  | 188 | 12.68  |   |
| 12419 | Smurf1         | -2.36 | 622  | 24.73  | 207 | 10.47  |   |
| 12420 | Msmo1          | -2.37 | 1230 | 150.52 | 357 | 63.64  |   |
| 12421 | Klf4           | -2.37 | 255  | 29.7   | 71  | 12.55  |   |
| 12422 | Rpl36          | -2.37 | 36   | 188.83 | 26  | 79.7   |   |
| 12423 | Uvrag          | -2.37 | 580  | 22.52  | 210 | 9.5    |   |
| 12424 | Fign           | -2.37 | 91   | 2.29   | 41  | 0.96   |   |
| 12425 | Loxl2          | -2.37 | 50   | 3.43   | 23  | 1.45   |   |
| 12426 | Uaca           | -2.37 | 43   | 1.64   | 15  | 0.69   |   |
| 12427 | Rps27a         | -2.38 | 7    | 76.71  | 3   | 32.29  |   |
| 12428 | Pgm2l1         | -2.38 | 338  | 12.79  | 95  | 5.37   |   |
| 12429 | Fam107b        | -2.39 | 63   | 4.12   | 19  | 1.73   |   |
| 12430 | Taf5l          | -2.39 | 287  | 30.45  | 83  | 12.75  |   |
| 12431 | Ywhah          | -2.39 | 1116 | 131.83 | 339 | 55.2   |   |
| 12432 | Arpc2          | -2.39 | 1478 | 130.04 | 431 | 54.44  |   |
| 12433 | Rn60_X_0641.1  | -2.39 | 146  | 19.21  | 42  | 8.03   |   |
| 12434 | Pvrl2          | -2.39 | 878  | 58.4   | 246 | 24.41  |   |
| 12435 | Wis            | -2.39 | 2709 | 108.07 | 834 | 45.15  |   |
| 12436 | Pfn1           | -2.4  | 1962 | 572.23 | 566 | 238.72 |   |
| 12437 | Rassf1         | -2.4  | 289  | 26.24  | 89  | 10.92  |   |
| 12438 | Golim4         | -2.41 | 678  | 56.72  | 220 | 23.57  |   |
| 12439 | AC095390.1     | -2.41 | 44   | 2.38   | 46  | 0.99   |   |
| 12440 | Ada            | -2.41 | 163  | 2.5    | 14  | 1.04   |   |
| 12441 | Armcx1_1       | -2.41 | 0    | 0.98   | 0   | 0.41   |   |
| 12442 | Clip3_1        | -2.41 | 0    | 0.82   | 0   | 0.34   |   |
| 12443 | Etv5           | -2.41 | 50   | 2.69   | 13  | 1.11   |   |
| 12444 | Fam131c        | -2.41 | 8    | 1.27   | 2   | 0.53   |   |
| 12445 | Galnt18        | -2.41 | 22   | 0.7    | 14  | 0.29   |   |
| 12446 | Kdr            | -2.41 | 149  | 5.78   | 46  | 2.4    |   |
| 12447 | Kif21b         | -2.41 | 9    | 0.31   | 3   | 0.13   |   |
| 12448 | Llph           | -2.41 | 3    | 4.58   | 1   | 1.9    |   |
| 12449 | LOC100361180   | -2.41 | 5    | 16.97  | 1   | 7.05   |   |
| 12450 | LOC690871      | -2.41 | 39   | 19.25  | 16  | 7.99   |   |
| 12451 | Mrpl30         | -2.41 | 11   | 1.19   | 3   | 0.49   |   |
| 12452 | Pdgfb          | -2.41 | 31   | 3.19   | 12  | 1.33   |   |
| 12453 | Polm           | -2.41 | 21   | 1.08   | 12  | 0.45   |   |
| 12454 | Pusl1          | -2.41 | 31   | 3.42   | 13  | 1.42   |   |
| 12455 | RGD1561381     | -2.41 | 4    | 3.82   | 2   | 1.59   |   |
| 12456 | Rrp15          | -2.41 | 96   | 13.07  | 31  | 5.43   |   |
| 12457 | Spire2         | -2.41 | 8    | 0.77   | 3   | 0.32   |   |
| 12458 | Vps13b         | -2.41 | 51   | 6.34   | 18  | 2.63   |   |
| 12459 | Zfyve28        | -2.41 | 22   | 0.44   | 7   | 0.18   |   |
| 12460 | AABR07050423.1 | -2.41 | 14   | 3.47   | 10  | 1.44   |   |
| 12461 | Capn12         | -2.41 | 25   | 0.59   | 5   | 0.25   |   |
| 12462 | Dnm3           | -2.41 | 40   | 0.43   | 30  | 0.18   |   |
| 12463 | Hrct1          | -2.41 | 27   | 21.73  | 8   | 9.02   |   |
| 12464 | Pdss1          | -2.41 | 90   | 2.41   | 28  | 1      |   |
| 12465 | RGD1560831     | -2.41 | 5    | 2.39   | 2   | 0.99   |   |
| 12466 | Rrs1           | -2.41 | 63   | 9.71   | 18  | 4.03   |   |
| 12467 | Luzp1          | -2.42 | 482  | 9.89   | 140 | 4.08   |   |
| 12468 | Sdc1           | -2.42 | 1082 | 86.44  | 304 | 35.65  |   |

Supplemental Table 2  
Vehicle versus FSH, 24 hours

|       | A              | B     | C    | D      | E   | F      | G |
|-------|----------------|-------|------|--------|-----|--------|---|
| 12469 | Sema3c         | -2.44 | 1870 | 82.63  | 537 | 33.85  |   |
| 12470 | Tceb2          | -2.44 | 286  | 150.18 | 92  | 61.47  |   |
| 12471 | Fus            | -2.44 | 552  | 110.71 | 269 | 45.31  |   |
| 12472 | Zfp703         | -2.44 | 136  | 10.49  | 38  | 4.29   |   |
| 12473 | Erf            | -2.45 | 256  | 13.36  | 65  | 5.46   |   |
| 12474 | AABR07035796.1 | -2.45 | 32   | 11.88  | 9   | 4.86   |   |
| 12475 | Spata5i1       | -2.45 | 51   | 3.19   | 15  | 1.3    |   |
| 12476 | 1700021K19Rik  | -2.45 | 312  | 18.72  | 112 | 7.64   |   |
| 12477 | Rab3b          | -2.45 | 74   | 12.36  | 18  | 5.04   |   |
| 12478 | Yars           | -2.45 | 385  | 31.75  | 108 | 12.95  |   |
| 12479 | Hdac7          | -2.45 | 263  | 14.88  | 74  | 6.07   |   |
| 12480 | Gspt1          | -2.46 | 1293 | 51.42  | 380 | 20.92  |   |
| 12481 | Ezr            | -2.46 | 422  | 32.9   | 120 | 13.36  |   |
| 12482 | Serinc3        | -2.47 | 2768 | 312.88 | 760 | 126.88 |   |
| 12483 | Dock8          | -2.47 | 60   | 1.43   | 34  | 0.58   |   |
| 12484 | Micall1        | -2.47 | 60   | 2.18   | 17  | 0.88   |   |
| 12485 | RGD1565183     | -2.47 | 19   | 32.76  | 8   | 13.27  |   |
| 12486 | Gprin3         | -2.48 | 18   | 1.69   | 5   | 0.68   |   |
| 12487 | Lingo1         | -2.48 | 20   | 1.82   | 6   | 0.74   |   |
| 12488 | LOC100912253   | -2.48 | 1    | 2.2    | 0   | 0.89   |   |
| 12489 | Mttr12         | -2.48 | 233  | 14.19  | 78  | 5.73   |   |
| 12490 | Osr2           | -2.48 | 21   | 2.21   | 7   | 0.89   |   |
| 12491 | Pcdh20         | -2.48 | 36   | 1.73   | 10  | 0.7    |   |
| 12492 | Phactr2        | -2.48 | 48   | 2.27   | 19  | 0.91   |   |
| 12493 | Znhit1         | -2.48 | 59   | 10.91  | 22  | 4.4    |   |
| 12494 | Rhpn2          | -2.48 | 25   | 1.41   | 9   | 0.57   |   |
| 12495 | S100a10        | -2.49 | 1306 | 541.82 | 355 | 218    |   |
| 12496 | Rn60_5_0791.1  | -2.49 | 509  | 21.57  | 136 | 8.67   |   |
| 12497 | Finc           | -2.49 | 2784 | 75.92  | 770 | 30.52  |   |
| 12498 | Bcs1l          | -2.49 | 54   | 7.1    | 16  | 2.85   |   |
| 12499 | Synpo2         | -2.49 | 87   | 2.82   | 38  | 1.14   |   |
| 12500 | Cmtm7          | -2.49 | 574  | 30.41  | 158 | 12.2   |   |
| 12501 | Coprs          | -2.49 | 36   | 13.09  | 9   | 5.25   |   |
| 12502 | Chmp6          | -2.5  | 86   | 15.67  | 26  | 6.27   |   |
| 12503 | Syde1          | -2.5  | 354  | 34.26  | 102 | 13.71  |   |
| 12504 | Cux1           | -2.5  | 928  | 36.89  | 317 | 14.77  |   |
| 12505 | Ddit3          | -2.5  | 134  | 18.59  | 38  | 7.44   |   |
| 12506 | Ilk            | -2.5  | 1456 | 210.97 | 405 | 84.31  |   |
| 12507 | Shisa2         | -2.5  | 46   | 10.39  | 11  | 4.15   |   |
| 12508 | Mpp5           | -2.51 | 773  | 34.12  | 230 | 13.6   |   |
| 12509 | Fdps           | -2.51 | 2762 | 210.69 | 797 | 83.93  |   |
| 12510 | Pcdhb20        | -2.52 | 10   | 0.81   | 3   | 0.32   |   |
| 12511 | Clec2j         | -2.52 | 28   | 5.19   | 4   | 2.06   |   |
| 12512 | Eng            | -2.52 | 11   | 0.9    | 3   | 0.36   |   |
| 12513 | Fbln2          | -2.52 | 13   | 0.64   | 4   | 0.25   |   |
| 12514 | Hmgn5          | -2.52 | 0    | 1.4    | 0   | 0.55   |   |
| 12515 | Ifit1lb        | -2.52 | 14   | 1.22   | 12  | 0.48   |   |
| 12516 | Ift43          | -2.52 | 128  | 16.43  | 42  | 6.51   |   |
| 12517 | Lamc2          | -2.52 | 11   | 0.53   | 5   | 0.21   |   |
| 12518 | LOC102550026   | -2.52 | 19   | 1.81   | 3   | 0.72   |   |
| 12519 | LOC688459      | -2.52 | 119  | 21     | 31  | 8.32   |   |
| 12520 | Mrpl54         | -2.52 | 67   | 26.91  | 19  | 10.67  |   |
| 12521 | Npepo          | -2.52 | 171  | 2.99   | 99  | 1.19   |   |
| 12522 | Rpl32_2        | -2.52 | 0    | 12.18  | 0   | 4.83   |   |



Supplemental Table 2  
Vehicle versus FSH, 24 hours

|       | A            | B     | C    | D       | E    | F      | G |
|-------|--------------|-------|------|---------|------|--------|---|
| 12523 | Slc6a15      | -2.52 | 11   | 0.7     | 5    | 0.28   |   |
| 12524 | Sqrdl        | -2.52 | 72   | 9.27    | 23   | 3.67   |   |
| 12525 | Tlcd2        | -2.52 | 13   | 1.3     | 4    | 0.51   |   |
| 12526 | Ubxn2a       | -2.52 | 9    | 3.53    | 5    | 1.4    |   |
| 12527 | Xrcc4        | -2.52 | 56   | 3.81    | 43   | 1.51   |   |
| 12528 | Rab27b       | -2.52 | 15   | 2.06    | 16   | 0.82   |   |
| 12529 | Slc9a9       | -2.52 | 52   | 0.79    | 39   | 0.31   |   |
| 12530 | RGD1359290   | -2.54 | 52   | 18.04   | 20   | 7.1    |   |
| 12531 | Rpl13        | -2.54 | 28   | 56.41   | 9    | 22.2   |   |
| 12532 | Hnrnpab_1    | -2.54 | 2    | 123.22  | 0    | 48.47  |   |
| 12533 | Gtf2f1       | -2.54 | 270  | 36.92   | 76   | 14.52  |   |
| 12534 | Sbds         | -2.54 | 205  | 30.39   | 63   | 11.95  |   |
| 12535 | Bach2        | -2.55 | 142  | 2.46    | 36   | 0.96   |   |
| 12536 | Nap1l3       | -2.55 | 37   | 3.3     | 10   | 1.29   |   |
| 12537 | Pak1ip1      | -2.55 | 82   | 11.93   | 25   | 4.68   |   |
| 12538 | Cystm1       | -2.55 | 182  | 59.47   | 43   | 23.33  |   |
| 12539 | Met          | -2.55 | 668  | 31.78   | 186  | 12.46  |   |
| 12540 | Wdr1         | -2.55 | 1632 | 129.7   | 427  | 50.78  |   |
| 12541 | Vasp         | -2.56 | 566  | 59.75   | 150  | 23.38  |   |
| 12542 | Osmr         | -2.56 | 43   | 2.24    | 11   | 0.88   |   |
| 12543 | Vim          | -2.56 | 7900 | 1043.22 | 2114 | 407.89 |   |
| 12544 | Cfl1         | -2.56 | 3422 | 921.35  | 910  | 360.1  |   |
| 12545 | Angptl4      | -2.56 | 71   | 8.84    | 23   | 3.45   |   |
| 12546 | Cox6b1_2     | -2.57 | 25   | 39.14   | 8    | 15.26  |   |
| 12547 | Lyn          | -2.57 | 189  | 9.23    | 53   | 3.59   |   |
| 12548 | Bloc1s2      | -2.57 | 115  | 24.82   | 36   | 9.64   |   |
| 12549 | Acsl1        | -2.58 | 351  | 19.05   | 92   | 7.39   |   |
| 12550 | Ccdc141      | -2.58 | 75   | 1.46    | 17   | 0.56   |   |
| 12551 | Eme1         | -2.58 | 18   | 1.34    | 6    | 0.52   |   |
| 12552 | LOC100360002 | -2.58 | 0    | 12.13   | 0    | 4.7    |   |
| 12553 | Plekhg1      | -2.58 | 47   | 1.22    | 13   | 0.47   |   |
| 12554 | Y_RNA_9      | -2.58 | 13   | 33.37   | 4    | 12.93  |   |
| 12555 | Chst7        | -2.58 | 32   | 3.24    | 9    | 1.26   |   |
| 12556 | Actr3        | -2.58 | 1458 | 136.91  | 396  | 53     |   |
| 12557 | Papd5        | -2.59 | 317  | 13.98   | 98   | 5.4    |   |
| 12558 | Iltgav       | -2.59 | 1506 | 101.31  | 411  | 39.13  |   |
| 12559 | Actr2        | -2.59 | 492  | 65.2    | 150  | 25.15  |   |
| 12560 | Klf8         | -2.6  | 94   | 3.76    | 27   | 1.45   |   |
| 12561 | Cnst         | -2.6  | 217  | 14.33   | 57   | 5.52   |   |
| 12562 | Foxo4        | -2.6  | 12   | 2.56    | 5    | 0.98   |   |
| 12563 | Nme2         | -2.6  | 650  | 214.76  | 178  | 82.51  |   |
| 12564 | Mbnl1        | -2.6  | 590  | 58.82   | 183  | 22.59  |   |
| 12565 | Atf5         | -2.61 | 112  | 26.61   | 32   | 10.19  |   |
| 12566 | Ppap2b       | -2.61 | 290  | 19.34   | 81   | 7.41   |   |
| 12567 | Rala         | -2.61 | 157  | 33.03   | 44   | 12.65  |   |
| 12568 | BC030336     | -2.62 | 33   | 11.87   | 14   | 4.54   |   |
| 12569 | Tmc7         | -2.62 | 25   | 1.07    | 11   | 0.41   |   |
| 12570 | Zc2hc1a      | -2.62 | 113  | 8.31    | 32   | 3.18   |   |
| 12571 | Pawr         | -2.62 | 1136 | 75.89   | 308  | 28.99  |   |
| 12572 | Crebzf       | -2.62 | 391  | 54.29   | 127  | 20.73  |   |
| 12573 | Lrrk2        | -2.62 | 153  | 3.6     | 73   | 1.38   |   |
| 12574 | Osbpl3       | -2.62 | 136  | 3.61    | 32   | 1.38   |   |
| 12575 | Sparc        | -2.62 | 5022 | 605.22  | 1313 | 230.61 |   |
| 12576 | Sh3bgrl      | -2.63 | 181  | 75.04   | 69   | 28.58  |   |

Supplemental Table 2  
Vehicle versus FSH, 24 hours

|       | A              | B     | C     | D       | E     | F       | G |
|-------|----------------|-------|-------|---------|-------|---------|---|
| 12577 | Sipa1          | -2.63 | 91    | 6.06    | 23    | 2.31    |   |
| 12578 | Shroom4        | -2.63 | 466   | 11.27   | 125   | 4.28    |   |
| 12579 | Nbas           | -2.64 | 1289  | 31.13   | 350   | 11.81   |   |
| 12580 | AC095263.1     | -2.64 | 32    | 6.53    | 13    | 2.47    |   |
| 12581 | Frem2          | -2.64 | 24    | 0.58    | 10    | 0.22    |   |
| 12582 | Lonrf1         | -2.64 | 170   | 11.47   | 54    | 4.35    |   |
| 12583 | Prkaa2         | -2.64 | 150   | 11.18   | 48    | 4.23    |   |
| 12584 | Kctd10         | -2.64 | 449   | 33.66   | 119   | 12.74   |   |
| 12585 | Fnip2          | -2.65 | 70    | 2.83    | 22    | 1.07    |   |
| 12586 | Afap1          | -2.66 | 492   | 17.02   | 134   | 6.4     |   |
| 12587 | AABR07067760.1 | -2.66 | 84    | 79.32   | 28    | 29.83   |   |
| 12588 | Atf4           | -2.67 | 1257  | 220.89  | 322   | 82.69   |   |
| 12589 | Actb           | -2.67 | 43601 | 7899.18 | 11218 | 2956.77 |   |
| 12590 | Rab11fip1      | -2.67 | 843   | 25.78   | 216   | 9.64    |   |
| 12591 | Gapdh-ps2      | -2.67 | 71    | 238.95  | 36    | 89.35   |   |
| 12592 | Ss18l2         | -2.68 | 38    | 14.51   | 12    | 5.42    |   |
| 12593 | RGD1304622     | -2.68 | 93    | 5.4     | 27    | 2.02    |   |
| 12594 | Frmf6          | -2.68 | 327   | 16.17   | 88    | 6.03    |   |
| 12595 | Vrk2           | -2.68 | 63    | 4.29    | 29    | 1.6     |   |
| 12596 | Zfp57          | -2.69 | 153   | 16.95   | 34    | 6.3     |   |
| 12597 | Mrpl33         | -2.7  | 62    | 49.62   | 22    | 18.41   |   |
| 12598 | Dock5          | -2.7  | 840   | 27.01   | 237   | 10.01   |   |
| 12599 | P4ha1          | -2.7  | 1492  | 146.61  | 401   | 54.28   |   |
| 12600 | Cyld           | -2.7  | 228   | 19.24   | 69    | 7.12    |   |
| 12601 | Rbms1          | -2.71 | 772   | 35.34   | 268   | 13.04   |   |
| 12602 | Hdac5          | -2.71 | 468   | 36.21   | 113   | 13.34   |   |
| 12603 | Creb3          | -2.71 | 861   | 135.16  | 218   | 49.79   |   |
| 12604 | Map2k3         | -2.72 | 0     | 10.22   | 0     | 3.75    |   |
| 12605 | Zbtb46         | -2.75 | 85    | 2.76    | 31    | 1       |   |
| 12606 | AABR07024666.1 | -2.75 | 0     | 4.68    | 0     | 1.7     |   |
| 12607 | AABR07026359.1 | -2.75 | 0     | 1.08    | 0     | 0.39    |   |
| 12608 | AABR07041140.1 | -2.75 | 2     | 0.78    | 1     | 0.28    |   |
| 12609 | AABR07050399.2 | -2.75 | 0     | 0.52    | 0     | 0.19    |   |
| 12610 | AABR07066677.1 | -2.75 | 1     | 4.43    | 1     | 1.61    |   |
| 12611 | AABR07071482.1 | -2.75 | 1     | 2.37    | 0     | 0.86    |   |
| 12612 | AABR07071701.1 | -2.75 | 10    | 8.74    | 3     | 3.18    |   |
| 12613 | Abhd15         | -2.75 | 4     | 0.32    | 2     | 0.12    |   |
| 12614 | AC131360.2     | -2.75 | 3     | 0.41    | 1     | 0.15    |   |
| 12615 | Adat2          | -2.75 | 7     | 1.76    | 6     | 0.64    |   |
| 12616 | B3gnt5         | -2.75 | 8     | 0.47    | 2     | 0.17    |   |
| 12617 | Ccno           | -2.75 | 4     | 0.53    | 1     | 0.19    |   |
| 12618 | Cldn2          | -2.75 | 6     | 0.22    | 1     | 0.08    |   |
| 12619 | Cnksr2         | -2.75 | 35    | 0.79    | 10    | 0.29    |   |
| 12620 | Csgalnact1     | -2.75 | 33    | 1.84    | 12    | 0.67    |   |
| 12621 | Dbf4_2         | -2.75 | 2     | 1       | 0     | 0.36    |   |
| 12622 | Foxc1          | -2.75 | 4     | 0.25    | 1     | 0.09    |   |
| 12623 | Kcng3          | -2.75 | 6     | 0.63    | 8     | 0.23    |   |
| 12624 | LOC100912034   | -2.75 | 2     | 0.55    | 0     | 0.2     |   |
| 12625 | LOC100912373   | -2.75 | 5     | 1.15    | 2     | 0.42    |   |
| 12626 | Lppr4          | -2.75 | 17    | 0.72    | 5     | 0.26    |   |
| 12627 | Lrrc34         | -2.75 | 9     | 1.02    | 5     | 0.37    |   |
| 12628 | Lrrc51         | -2.75 | 9     | 1.37    | 5     | 0.5     |   |
| 12629 | Lsm11          | -2.75 | 49    | 7.84    | 13    | 2.85    |   |
| 12630 | Mboat7         | -2.75 | 0     | 0.7     | 0     | 0.25    |   |

Supplemental Table 2  
Vehicle versus FSH, 24 hours

|       | A              | B     | C   | D     | E  | F    | G |
|-------|----------------|-------|-----|-------|----|------|---|
| 12631 | Mpzi2          | -2.75 | 21  | 1.53  | 6  | 0.56 |   |
| 12632 | Nrip3          | -2.75 | 50  | 2.58  | 12 | 0.94 |   |
| 12633 | Ocel1          | -2.75 | 24  | 4.7   | 6  | 1.71 |   |
| 12634 | Pik3ap1        | -2.75 | 17  | 0.65  | 7  | 0.24 |   |
| 12635 | Plce1          | -2.75 | 10  | 0.1   | 9  | 0.04 |   |
| 12636 | Plekhh2        | -2.75 | 130 | 4.66  | 39 | 1.69 |   |
| 12637 | Pyroxd1        | -2.75 | 67  | 6.17  | 21 | 2.24 |   |
| 12638 | Rgcc           | -2.75 | 4   | 1.12  | 3  | 0.41 |   |
| 12639 | RGD1564606     | -2.75 | 0   | 4.23  | 0  | 1.54 |   |
| 12640 | Rn60_18_0532.1 | -2.75 | 0   | 1.99  | 0  | 0.72 |   |
| 12641 | Rps15a2        | -2.75 | 3   | 2.54  | 0  | 0.92 |   |
| 12642 | Rragd          | -2.75 | 8   | 0.69  | 1  | 0.25 |   |
| 12643 | Ryr1           | -2.75 | 9   | 0.07  | 36 | 0.02 |   |
| 12644 | Sapcd2         | -2.75 | 12  | 1.93  | 6  | 0.7  |   |
| 12645 | Slc16a4        | -2.75 | 58  | 0.5   | 48 | 0.18 |   |
| 12646 | Slc4a11        | -2.75 | 14  | 0.98  | 4  | 0.36 |   |
| 12647 | SNORD88_3      | -2.75 | 4   | 11.07 | 1  | 4.02 |   |
| 12648 | Stk10          | -2.75 | 58  | 3.62  | 29 | 1.31 |   |
| 12649 | Trim71         | -2.75 | 5   | 0.39  | 4  | 0.14 |   |
| 12650 | Ttll3          | -2.75 | 29  | 0.44  | 15 | 0.16 |   |
| 12651 | Vwa7           | -2.75 | 11  | 0.67  | 6  | 0.24 |   |
| 12652 | AABR07011031.1 | -2.75 | 31  | 6.45  | 6  | 2.34 |   |
| 12653 | AABR07028907.1 | -2.75 | 5   | 0.79  | 3  | 0.29 |   |
| 12654 | AABR07055492.1 | -2.75 | 13  | 1.13  | 3  | 0.41 |   |
| 12655 | AABR07062268.1 | -2.75 | 0   | 2.08  | 0  | 0.75 |   |
| 12656 | AABR07062344.1 | -2.75 | 0   | 7.91  | 0  | 2.87 |   |
| 12657 | Ank3           | -2.75 | 35  | 0.48  | 17 | 0.17 |   |
| 12658 | Apopt1         | -2.75 | 0   | 0.9   | 0  | 0.33 |   |
| 12659 | Cask_1         | -2.75 | 0   | 0.93  | 0  | 0.34 |   |
| 12660 | Cntnap5c       | -2.75 | 54  | 0.52  | 29 | 0.19 |   |
| 12661 | Dok6           | -2.75 | 53  | 1.38  | 26 | 0.5  |   |
| 12662 | Dync1i1        | -2.75 | 49  | 1.89  | 15 | 0.68 |   |
| 12663 | Esr1           | -2.75 | 21  | 0.18  | 18 | 0.06 |   |
| 12664 | Fbxl22         | -2.75 | 13  | 0.22  | 2  | 0.08 |   |
| 12665 | Frmppd4        | -2.75 | 8   | 0.19  | 2  | 0.07 |   |
| 12666 | Gadd45gip1     | -2.75 | 42  | 8.22  | 17 | 2.99 |   |
| 12667 | Gmfb           | -2.75 | 58  | 26.06 | 18 | 9.47 |   |
| 12668 | Gucy1a2        | -2.75 | 22  | 0.45  | 22 | 0.17 |   |
| 12669 | Heatr4         | -2.75 | 5   | 0.25  | 2  | 0.09 |   |
| 12670 | Hmmr           | -2.75 | 27  | 2.62  | 14 | 0.95 |   |
| 12671 | LOC100359687   | -2.75 | 1   | 4.65  | 0  | 1.69 |   |
| 12672 | LOC100362583   | -2.75 | 2   | 3.27  | 0  | 1.19 |   |
| 12673 | LOC100362999   | -2.75 | 1   | 0.63  | 0  | 0.23 |   |
| 12674 | LOC100911951   | -2.75 | 0   | 0.39  | 0  | 0.14 |   |
| 12675 | LOC102549817   | -2.75 | 31  | 1.1   | 35 | 0.4  |   |
| 12676 | LOC686013      | -2.75 | 11  | 0.68  | 8  | 0.25 |   |
| 12677 | Map7d3         | -2.75 | 9   | 0.29  | 7  | 0.11 |   |
| 12678 | Nr1h3          | -2.75 | 5   | 0.61  | 2  | 0.22 |   |
| 12679 | Orai2          | -2.75 | 16  | 0.47  | 3  | 0.17 |   |
| 12680 | Pcdhb21        | -2.75 | 3   | 0.34  | 1  | 0.12 |   |
| 12681 | Pinx1          | -2.75 | 93  | 8.41  | 38 | 3.05 |   |
| 12682 | Pla2g4f        | -2.75 | 4   | 0.41  | 3  | 0.15 |   |
| 12683 | Ptp4a3         | -2.75 | 18  | 3     | 4  | 1.09 |   |
| 12684 | Ptprq          | -2.75 | 9   | 0.13  | 10 | 0.05 |   |

Supplemental Table 2  
Vehicle versus FSH, 24 hours

|       | A              | B     | C    | D      | E    | F      | G |
|-------|----------------|-------|------|--------|------|--------|---|
| 12685 | Robo2          | -2.75 | 145  | 2.22   | 41   | 0.81   |   |
| 12686 | Slc9b2         | -2.75 | 8    | 0.51   | 2    | 0.18   |   |
| 12687 | Stk26          | -2.75 | 4    | 0.3    | 2    | 0.11   |   |
| 12688 | Tceal5         | -2.75 | 2    | 1.65   | 0    | 0.6    |   |
| 12689 | Triap1         | -2.75 | 0    | 4.31   | 0    | 1.57   |   |
| 12690 | Uchl3          | -2.75 | 1    | 4.31   | 1    | 1.57   |   |
| 12691 | Wisp1          | -2.75 | 4    | 0.2    | 2    | 0.07   |   |
| 12692 | Ppp1r14b       | -2.76 | 558  | 191.45 | 139  | 69.3   |   |
| 12693 | Tsc22d2        | -2.76 | 344  | 11.43  | 113  | 4.13   |   |
| 12694 | Fzd4           | -2.77 | 358  | 13.03  | 89   | 4.71   |   |
| 12695 | Nhs1           | -2.77 | 198  | 7.77   | 60   | 2.81   |   |
| 12696 | Itga6          | -2.77 | 3109 | 120.45 | 784  | 43.47  |   |
| 12697 | Asap2          | -2.77 | 211  | 11.66  | 65   | 4.2    |   |
| 12698 | Itga3          | -2.78 | 343  | 18.03  | 86   | 6.49   |   |
| 12699 | Cgn            | -2.78 | 118  | 5.14   | 31   | 1.85   |   |
| 12700 | Ppp2cb         | -2.78 | 1685 | 235.02 | 418  | 84.52  |   |
| 12701 | Cd151          | -2.78 | 20   | 59.13  | 5    | 21.26  |   |
| 12702 | Arpc1b         | -2.79 | 659  | 107.16 | 168  | 38.45  |   |
| 12703 | Lrrfip2        | -2.79 | 145  | 10.04  | 64   | 3.6    |   |
| 12704 | Prnp           | -2.79 | 2380 | 262.31 | 565  | 93.98  |   |
| 12705 | Hebp1          | -2.8  | 75   | 14.31  | 30   | 5.11   |   |
| 12706 | Gypc           | -2.8  | 166  | 18.98  | 35   | 6.77   |   |
| 12707 | Slc6a9         | -2.8  | 121  | 8.33   | 37   | 2.97   |   |
| 12708 | Tbc1d23        | -2.8  | 807  | 35.82  | 217  | 12.77  |   |
| 12709 | Nab2           | -2.81 | 228  | 12.26  | 49   | 4.37   |   |
| 12710 | Macf1          | -2.82 | 4603 | 37.03  | 1176 | 13.14  |   |
| 12711 | Ttc7b          | -2.82 | 1102 | 68.88  | 282  | 24.43  |   |
| 12712 | Ppp1r13l       | -2.82 | 97   | 8.25   | 21   | 2.92   |   |
| 12713 | Chn1           | -2.83 | 189  | 9.45   | 49   | 3.34   |   |
| 12714 | Pmaip1         | -2.83 | 38   | 3.34   | 9    | 1.18   |   |
| 12715 | Rab32          | -2.83 | 89   | 5.71   | 21   | 2.02   |   |
| 12716 | Bcor           | -2.83 | 521  | 18.69  | 125  | 6.61   |   |
| 12717 | Gnal           | -2.83 | 224  | 10.16  | 135  | 3.59   |   |
| 12718 | Mafk           | -2.84 | 381  | 31.46  | 86   | 11.09  |   |
| 12719 | Dbndd2         | -2.84 | 34   | 7.07   | 8    | 2.49   |   |
| 12720 | Trim47         | -2.84 | 79   | 7.03   | 17   | 2.47   |   |
| 12721 | Ston1          | -2.85 | 302  | 21.73  | 73   | 7.63   |   |
| 12722 | S100a11        | -2.86 | 756  | 733.23 | 188  | 256.01 |   |
| 12723 | Cars           | -2.86 | 476  | 31.48  | 112  | 10.99  |   |
| 12724 | AABR07005618.1 | -2.87 | 26   | 14.32  | 7    | 4.99   |   |
| 12725 | Dusp5          | -2.87 | 34   | 2.58   | 9    | 0.9    |   |
| 12726 | Rps19          | -2.87 | 76   | 354.6  | 18   | 123.67 |   |
| 12727 | Svil           | -2.87 | 738  | 19.21  | 189  | 6.7    |   |
| 12728 | Ppp1r12b       | -2.88 | 1777 | 38.69  | 484  | 13.45  |   |
| 12729 | S100a4         | -2.88 | 94   | 35.1   | 22   | 12.2   |   |
| 12730 | Rras           | -2.89 | 174  | 45.11  | 41   | 15.63  |   |
| 12731 | AABR07005535.1 | -2.89 | 21   | 2.31   | 5    | 0.8    |   |
| 12732 | Arhgap42       | -2.89 | 419  | 17.23  | 117  | 5.96   |   |
| 12733 | Pak7           | -2.89 | 51   | 1.21   | 23   | 0.42   |   |
| 12734 | RGD1562758     | -2.89 | 8    | 10.44  | 2    | 3.61   |   |
| 12735 | Kif23          | -2.89 | 650  | 39.8   | 155  | 13.76  |   |
| 12736 | Aldh18a1       | -2.89 | 0    | 16.28  | 0    | 5.63   |   |
| 12737 | Gss            | -2.9  | 146  | 16.15  | 47   | 5.58   |   |
| 12738 | Cdk14          | -2.9  | 466  | 12.13  | 127  | 4.19   |   |

Supplemental Table 2  
Vehicle versus FSH, 24 hours

|       | A              | B     | C    | D      | E   | F     | G |
|-------|----------------|-------|------|--------|-----|-------|---|
| 12739 | Anxa1          | -2.9  | 1533 | 226.1  | 355 | 78.04 |   |
| 12740 | Jdp2           | -2.9  | 92   | 12.71  | 22  | 4.38  |   |
| 12741 | Trmt13         | -2.91 | 61   | 4.27   | 36  | 1.47  |   |
| 12742 | Cd2ap          | -2.91 | 258  | 23.47  | 78  | 8.06  |   |
| 12743 | Pqlc3          | -2.91 | 615  | 69.82  | 141 | 23.99 |   |
| 12744 | Pet100         | -2.91 | 44   | 11.45  | 7   | 3.93  |   |
| 12745 | Plk3           | -2.91 | 57   | 5.74   | 15  | 1.97  |   |
| 12746 | Shisa4         | -2.91 | 94   | 30.2   | 22  | 10.36 |   |
| 12747 | Slc24a3        | -2.92 | 324  | 28.05  | 74  | 9.62  |   |
| 12748 | Pde4dip        | -2.92 | 359  | 5.78   | 155 | 1.98  |   |
| 12749 | Fgd6           | -2.92 | 29   | 0.77   | 8   | 0.26  |   |
| 12750 | Gemin6         | -2.92 | 17   | 3.89   | 6   | 1.33  |   |
| 12751 | Pid1           | -2.92 | 35   | 1.46   | 11  | 0.5   |   |
| 12752 | Ppip5k1        | -2.94 | 805  | 17.2   | 266 | 5.86  |   |
| 12753 | Spata13        | -2.94 | 888  | 29.75  | 239 | 10.12 |   |
| 12754 | Mtfr1          | -2.94 | 38   | 10.99  | 11  | 3.74  |   |
| 12755 | Etl4           | -2.94 | 2288 | 44     | 487 | 14.95 |   |
| 12756 | Cdyl           | -2.95 | 365  | 18.6   | 86  | 6.3   |   |
| 12757 | Ppp1r15a       | -2.95 | 458  | 45.51  | 104 | 15.41 |   |
| 12758 | Rpl17          | -2.97 | 315  | 193.08 | 89  | 65.08 |   |
| 12759 | Btg2           | -2.97 | 151  | 14.69  | 36  | 4.95  |   |
| 12760 | Spp1           | -2.98 | 577  | 93.66  | 132 | 31.46 |   |
| 12761 | Plxna2         | -2.98 | 1000 | 20.29  | 239 | 6.81  |   |
| 12762 | Nkd2           | -2.98 | 29   | 1.61   | 6   | 0.54  |   |
| 12763 | Rp2            | -2.98 | 56   | 2.06   | 32  | 0.69  |   |
| 12764 | Abhd3          | -2.98 | 45   | 3.39   | 18  | 1.14  |   |
| 12765 | Gfra2          | -2.98 | 18   | 1.16   | 6   | 0.39  |   |
| 12766 | Myl6b          | -2.98 | 49   | 5.19   | 30  | 1.74  |   |
| 12767 | Rel            | -2.98 | 17   | 1.83   | 4   | 0.61  |   |
| 12768 | RGD1565048     | -2.98 | 2    | 5.43   | 0   | 1.82  |   |
| 12769 | Slc25a29       | -2.98 | 20   | 1.08   | 9   | 0.36  |   |
| 12770 | Zfp583         | -2.98 | 13   | 1.36   | 4   | 0.45  |   |
| 12771 | Zfp717         | -2.98 | 5    | 0.83   | 2   | 0.28  |   |
| 12772 | Carns1         | -2.98 | 18   | 1.14   | 4   | 0.38  |   |
| 12773 | AABR07027388.1 | -3.01 | 12   | 58.37  | 3   | 19.39 |   |
| 12774 | F2rl1          | -3.01 | 36   | 2.93   | 9   | 0.97  |   |
| 12775 | Snap23         | -3.01 | 74   | 13.78  | 28  | 4.58  |   |
| 12776 | Hyi            | -3.01 | 30   | 8.39   | 11  | 2.79  |   |
| 12777 | Rictor         | -3.01 | 712  | 22.65  | 176 | 7.52  |   |
| 12778 | Nedd9          | -3.01 | 189  | 8.41   | 45  | 2.79  |   |
| 12779 | Kif5c          | -3.01 | 125  | 3.48   | 30  | 1.15  |   |
| 12780 | Pik3r3         | -3.02 | 314  | 24.6   | 77  | 8.14  |   |
| 12781 | Thsd7a         | -3.02 | 186  | 5.1    | 47  | 1.69  |   |
| 12782 | Fbln5          | -3.02 | 1038 | 90.41  | 214 | 29.89 |   |
| 12783 | Clcf1          | -3.03 | 99   | 9.71   | 21  | 3.21  |   |
| 12784 | Dclre1c        | -3.03 | 54   | 2.31   | 34  | 0.76  |   |
| 12785 | Rasa3          | -3.03 | 336  | 20.09  | 79  | 6.63  |   |
| 12786 | LOC690468      | -3.04 | 73   | 192.42 | 16  | 63.33 |   |
| 12787 | Tdrp           | -3.04 | 62   | 4.99   | 13  | 1.64  |   |
| 12788 | Wwc3           | -3.04 | 500  | 19.1   | 114 | 6.27  |   |
| 12789 | Cd99           | -3.04 | 350  | 115.14 | 87  | 37.81 |   |
| 12790 | Ccs            | -3.07 | 82   | 11.02  | 26  | 3.59  |   |
| 12791 | MGC95208       | -3.07 | 23   | 8.28   | 2   | 2.7   |   |
| 12792 | Armc6          | -3.08 | 97   | 10.05  | 24  | 3.27  |   |

Supplemental Table 2  
Vehicle versus FSH, 24 hours

|       | A              | B     | C    | D      | E   | F      | G |
|-------|----------------|-------|------|--------|-----|--------|---|
| 12793 | Cdc42ep1       | -3.08 | 201  | 18.21  | 45  | 5.91   |   |
| 12794 | AABR07047011.1 | -3.08 | 57   | 7.94   | 16  | 2.58   |   |
| 12795 | Clic1          | -3.09 | 731  | 182.62 | 190 | 59.01  |   |
| 12796 | RGD1564688     | -3.1  | 2    | 8.95   | 0   | 2.89   |   |
| 12797 | Bdkrb2         | -3.1  | 9    | 0.54   | 2   | 0.18   |   |
| 12798 | Dtx4           | -3.1  | 11   | 1.14   | 5   | 0.37   |   |
| 12799 | Fgf13          | -3.1  | 12   | 0.77   | 10  | 0.25   |   |
| 12800 | Fgf18          | -3.1  | 14   | 4.04   | 11  | 1.3    |   |
| 12801 | LOC100363408   | -3.1  | 107  | 49.7   | 26  | 16.05  |   |
| 12802 | LOC100911256   | -3.1  | 0    | 0.35   | 0   | 0.11   |   |
| 12803 | Nthl1          | -3.1  | 47   | 7.59   | 13  | 2.45   |   |
| 12804 | RGD1562399     | -3.1  | 2    | 2.56   | 0   | 0.83   |   |
| 12805 | RGD1564698     | -3.1  | 3    | 4.02   | 2   | 1.3    |   |
| 12806 | AABR07028027.1 | -3.1  | 0    | 1.76   | 0   | 0.57   |   |
| 12807 | Aldh1l2        | -3.1  | 20   | 0.81   | 3   | 0.26   |   |
| 12808 | Cenpw          | -3.1  | 15   | 1.4    | 2   | 0.45   |   |
| 12809 | Grhl1          | -3.1  | 21   | 1.42   | 6   | 0.46   |   |
| 12810 | Isg20          | -3.1  | 19   | 2.57   | 6   | 0.83   |   |
| 12811 | Pak1           | -3.1  | 76   | 4.63   | 20  | 1.5    |   |
| 12812 | Pmel           | -3.1  | 10   | 0.92   | 5   | 0.3    |   |
| 12813 | Psmc10         | -3.1  | 13   | 4.27   | 7   | 1.38   |   |
| 12814 | RGD1562953     | -3.1  | 4    | 8.27   | 1   | 2.67   |   |
| 12815 | Samhd1         | -3.1  | 73   | 5.35   | 16  | 1.73   |   |
| 12816 | Scml2          | -3.1  | 14   | 0.52   | 13  | 0.17   |   |
| 12817 | Zfx3           | -3.1  | 619  | 11.21  | 149 | 3.62   |   |
| 12818 | Cadm1          | -3.1  | 287  | 25.34  | 59  | 8.16   |   |
| 12819 | Eea1           | -3.11 | 282  | 9.52   | 73  | 3.07   |   |
| 12820 | Ptpn14         | -3.11 | 210  | 9.79   | 64  | 3.15   |   |
| 12821 | Rnft1          | -3.11 | 104  | 17.95  | 27  | 5.76   |   |
| 12822 | Fermt2         | -3.12 | 1636 | 104.2  | 370 | 33.38  |   |
| 12823 | Col5a2         | -3.12 | 3200 | 172.06 | 690 | 55.09  |   |
| 12824 | Filip1l        | -3.12 | 6104 | 92.85  | 539 | 29.73  |   |
| 12825 | Ahnak2         | -3.14 | 449  | 6.56   | 98  | 2.09   |   |
| 12826 | Brip1          | -3.15 | 67   | 1.82   | 33  | 0.58   |   |
| 12827 | Gpr176         | -3.15 | 876  | 30.43  | 160 | 9.66   |   |
| 12828 | Psd3           | -3.15 | 1156 | 39.77  | 389 | 12.62  |   |
| 12829 | Col4a1         | -3.16 | 627  | 23.29  | 141 | 7.37   |   |
| 12830 | Ankrd50        | -3.16 | 669  | 18.02  | 143 | 5.7    |   |
| 12831 | Dmd            | -3.16 | 1509 | 16.15  | 321 | 5.11   |   |
| 12832 | 5S_rRNA_260    | -3.16 | 17   | 355.95 | 5   | 112.58 |   |
| 12833 | Col8a1         | -3.16 | 2254 | 108.91 | 453 | 34.43  |   |
| 12834 | Krt18          | -3.17 | 20   | 4.19   | 5   | 1.32   |   |
| 12835 | Ccdc107        | -3.18 | 75   | 31.57  | 19  | 9.94   |   |
| 12836 | Pls3           | -3.18 | 2191 | 146.69 | 491 | 46.1   |   |
| 12837 | Leng1          | -3.18 | 34   | 4.99   | 12  | 1.57   |   |
| 12838 | Igf1           | -3.18 | 1422 | 132.93 | 315 | 41.76  |   |
| 12839 | Atp5i          | -3.19 | 99   | 75.87  | 19  | 23.8   |   |
| 12840 | Hip1           | -3.19 | 1560 | 40.54  | 325 | 12.71  |   |
| 12841 | Plk2           | -3.19 | 399  | 34.03  | 85  | 10.67  |   |
| 12842 | Prss23         | -3.19 | 3649 | 337.06 | 777 | 105.68 |   |
| 12843 | Nuak1          | -3.2  | 95   | 2.99   | 23  | 0.94   |   |
| 12844 | Klf5           | -3.2  | 76   | 6.8    | 16  | 2.12   |   |
| 12845 | Dusp6          | -3.2  | 256  | 23.16  | 55  | 7.23   |   |
| 12846 | Prkcdp         | -3.21 | 353  | 68.8   | 76  | 21.46  |   |

Supplemental Table 2  
Vehicle versus FSH, 24 hours

|       | A              | B     | C    | D      | E    | F      | G |
|-------|----------------|-------|------|--------|------|--------|---|
| 12847 | Rb1cc1         | -3.21 | 849  | 24.37  | 183  | 7.6    |   |
| 12848 | Unc119         | -3.21 | 386  | 69.88  | 84   | 21.78  |   |
| 12849 | AABR07008016.1 | -3.21 | 20   | 10.2   | 5    | 3.18   |   |
| 12850 | AABR07015006.1 | -3.21 | 6    | 3.65   | 2    | 1.14   |   |
| 12851 | LOC100912042   | -3.21 | 0    | 3.01   | 0    | 0.94   |   |
| 12852 | LOC100912427   | -3.21 | 0    | 3.6    | 0    | 1.12   |   |
| 12853 | LOC691931      | -3.21 | 32   | 4.88   | 5    | 1.52   |   |
| 12854 | Pin4           | -3.21 | 28   | 15     | 11   | 4.67   |   |
| 12855 | Ube2q2l        | -3.21 | 42   | 6.88   | 9    | 2.14   |   |
| 12856 | Col4a2         | -3.22 | 486  | 23.61  | 101  | 7.33   |   |
| 12857 | Inf2           | -3.22 | 268  | 15.59  | 52   | 4.84   |   |
| 12858 | Efnb2          | -3.23 | 153  | 7.16   | 36   | 2.22   |   |
| 12859 | Pfdn6          | -3.23 | 64   | 39.58  | 14   | 12.26  |   |
| 12860 | Errfi1         | -3.23 | 420  | 27.51  | 91   | 8.5    |   |
| 12861 | Tmem151a       | -3.23 | 84   | 4.71   | 28   | 1.46   |   |
| 12862 | Tgfb1i1        | -3.24 | 851  | 105.1  | 188  | 32.46  |   |
| 12863 | Map1a          | -3.24 | 1944 | 43.1   | 409  | 13.29  |   |
| 12864 | Lpp            | -3.25 | 1176 | 56.32  | 302  | 17.35  |   |
| 12865 | Snx18          | -3.25 | 900  | 48.2   | 184  | 14.83  |   |
| 12866 | Akap13         | -3.25 | 2022 | 35.04  | 455  | 10.78  |   |
| 12867 | AABR07010705.1 | -3.27 | 31   | 8.5    | 5    | 2.6    |   |
| 12868 | Znhit3         | -3.27 | 23   | 10.38  | 7    | 3.18   |   |
| 12869 | Dcun1d3        | -3.27 | 66   | 6.43   | 28   | 1.97   |   |
| 12870 | Hs3st3b1       | -3.27 | 24   | 1.25   | 5    | 0.38   |   |
| 12871 | Necab1         | -3.27 | 47   | 1.08   | 22   | 0.33   |   |
| 12872 | Spsb2_2        | -3.27 | 0    | 3.83   | 0    | 1.17   |   |
| 12873 | Pkig           | -3.28 | 1512 | 220.82 | 273  | 67.4   |   |
| 12874 | AABR07015055.1 | -3.28 | 0    | 37.59  | 0    | 11.45  |   |
| 12875 | Arl4a          | -3.29 | 91   | 20.72  | 19   | 6.3    |   |
| 12876 | Amot           | -3.3  | 276  | 9.05   | 57   | 2.74   |   |
| 12877 | LOC100912106   | -3.3  | 0    | 18.6   | 0    | 5.63   |   |
| 12878 | RGD1564405     | -3.3  | 16   | 2.97   | 3    | 0.9    |   |
| 12879 | Nme1           | -3.31 | 136  | 42.32  | 29   | 12.79  |   |
| 12880 | Iars           | -3.31 | 455  | 25.13  | 101  | 7.58   |   |
| 12881 | Car3           | -3.33 | 29   | 4.56   | 7    | 1.37   |   |
| 12882 | Irx3           | -3.33 | 30   | 4.61   | 6    | 1.39   |   |
| 12883 | Palm2          | -3.34 | 198  | 5.75   | 64   | 1.72   |   |
| 12884 | Rn60_8_0646.1  | -3.35 | 308  | 10.01  | 62   | 2.99   |   |
| 12885 | Cpeb2          | -3.35 | 101  | 3.66   | 29   | 1.09   |   |
| 12886 | Nin            | -3.35 | 16   | 4.34   | 3    | 1.29   |   |
| 12887 | LOC102551071   | -3.36 | 3730 | 560.88 | 749  | 167.16 |   |
| 12888 | LOC100910771   | -3.36 | 0    | 5.24   | 0    | 1.56   |   |
| 12889 | Pmepa1         | -3.37 | 158  | 13.98  | 41   | 4.15   |   |
| 12890 | Slc25a26       | -3.37 | 146  | 11.01  | 37   | 3.26   |   |
| 12891 | Iltgb1         | -3.39 | 5904 | 392.75 | 1209 | 116    |   |
| 12892 | Npnt           | -3.39 | 513  | 41.93  | 92   | 12.38  |   |
| 12893 | Raph1          | -3.39 | 255  | 12.6   | 75   | 3.72   |   |
| 12894 | Slc1a4         | -3.39 | 886  | 49.51  | 168  | 14.6   |   |
| 12895 | Dsp            | -3.4  | 242  | 6.17   | 49   | 1.82   |   |
| 12896 | Lasp1          | -3.42 | 3494 | 235.64 | 711  | 68.81  |   |
| 12897 | Msn            | -3.43 | 1610 | 80.88  | 327  | 23.61  |   |
| 12898 | Ckap2l         | -3.44 | 60   | 5.09   | 15   | 1.48   |   |
| 12899 | Ppp2r2c        | -3.44 | 297  | 0.76   | 173  | 0.22   |   |
| 12900 | AABR07015066.1 | -3.44 | 0    | 48.5   | 0    | 14.1   |   |

Supplemental Table 2  
Vehicle versus FSH, 24 hours

|       | A              | B     | C   | D     | E   | F     | G |
|-------|----------------|-------|-----|-------|-----|-------|---|
| 12901 | AABR07015505.1 | -3.44 | 0   | 1.97  | 0   | 0.57  |   |
| 12902 | AABR07019412.1 | -3.44 | 5   | 1.47  | 1   | 0.43  |   |
| 12903 | AABR07049961.1 | -3.44 | 1   | 0.73  | 0   | 0.21  |   |
| 12904 | AABR07055280.1 | -3.44 | 3   | 2.92  | 1   | 0.85  |   |
| 12905 | AC117101.1     | -3.44 | 1   | 5.54  | 0   | 1.61  |   |
| 12906 | Afmid          | -3.44 | 8   | 0.5   | 11  | 0.14  |   |
| 12907 | Akr1c12        | -3.44 | 7   | 1.01  | 1   | 0.29  |   |
| 12908 | Egr3           | -3.44 | 10  | 0.92  | 2   | 0.27  |   |
| 12909 | Fam57b         | -3.44 | 6   | 0.73  | 2   | 0.21  |   |
| 12910 | Fgfbp3         | -3.44 | 10  | 1.45  | 2   | 0.42  |   |
| 12911 | Hey1           | -3.44 | 7   | 1.33  | 1   | 0.39  |   |
| 12912 | Itgb1bp2       | -3.44 | 19  | 2.93  | 6   | 0.85  |   |
| 12913 | Lacc1          | -3.44 | 25  | 4.65  | 5   | 1.35  |   |
| 12914 | LOC100361913   | -3.44 | 0   | 4.8   | 0   | 1.4   |   |
| 12915 | LOC100363452   | -3.44 | 3   | 5.74  | 1   | 1.67  |   |
| 12916 | LOC100911713   | -3.44 | 1   | 3.27  | 0   | 0.95  |   |
| 12917 | LOC682408      | -3.44 | 1   | 0.83  | 0   | 0.24  |   |
| 12918 | Lrrc3b         | -3.44 | 5   | 1.6   | 1   | 0.46  |   |
| 12919 | Pkhd1          | -3.44 | 7   | 0.26  | 2   | 0.07  |   |
| 12920 | RGD1564664     | -3.44 | 10  | 1.79  | 2   | 0.52  |   |
| 12921 | RGD1564792     | -3.44 | 15  | 8.04  | 3   | 2.34  |   |
| 12922 | Rps2_1         | -3.44 | 5   | 1.1   | 0   | 0.32  |   |
| 12923 | SCARNA13_1     | -3.44 | 5   | 4.53  | 1   | 1.32  |   |
| 12924 | Snap91         | -3.44 | 41  | 1.47  | 7   | 0.43  |   |
| 12925 | Sox9           | -3.44 | 5   | 0.36  | 1   | 0.11  |   |
| 12926 | Spag4          | -3.44 | 0   | 0.93  | 0   | 0.27  |   |
| 12927 | Spryd7         | -3.44 | 18  | 2.72  | 6   | 0.79  |   |
| 12928 | Stbd1          | -3.44 | 26  | 3.22  | 5   | 0.94  |   |
| 12929 | Tesc           | -3.44 | 11  | 1.93  | 6   | 0.56  |   |
| 12930 | Ube2t          | -3.44 | 6   | 2.03  | 5   | 0.59  |   |
| 12931 | AABR07015040.1 | -3.44 | 8   | 2.07  | 2   | 0.6   |   |
| 12932 | AABR07051207.1 | -3.44 | 0   | 11.22 | 0   | 3.26  |   |
| 12933 | AABR07064980.1 | -3.44 | 0   | 3.92  | 0   | 1.14  |   |
| 12934 | Arsj           | -3.44 | 5   | 0.88  | 1   | 0.26  |   |
| 12935 | Cbln2          | -3.44 | 10  | 1.06  | 2   | 0.31  |   |
| 12936 | Dnaaf3         | -3.44 | 6   | 0.53  | 1   | 0.15  |   |
| 12937 | Eef1a2         | -3.44 | 5   | 0.62  | 1   | 0.18  |   |
| 12938 | Fscn3          | -3.44 | 5   | 0.69  | 3   | 0.2   |   |
| 12939 | Gng11          | -3.44 | 0   | 1.43  | 0   | 0.42  |   |
| 12940 | Grm8           | -3.44 | 58  | 0.31  | 33  | 0.09  |   |
| 12941 | Itgb3          | -3.44 | 62  | 4.17  | 18  | 1.21  |   |
| 12942 | LOC100911319_2 | -3.44 | 3   | 0.86  | 0   | 0.25  |   |
| 12943 | Mecom          | -3.44 | 6   | 0.26  | 1   | 0.07  |   |
| 12944 | Pgbd5          | -3.44 | 12  | 0.62  | 6   | 0.18  |   |
| 12945 | Ppapdc2        | -3.44 | 0   | 0.44  | 0   | 0.13  |   |
| 12946 | Rpl31l3        | -3.44 | 5   | 3.3   | 1   | 0.96  |   |
| 12947 | SCARNA2_1      | -3.44 | 5   | 2.99  | 1   | 0.87  |   |
| 12948 | Spata24        | -3.44 | 9   | 1.55  | 12  | 0.45  |   |
| 12949 | Tmem35         | -3.44 | 5   | 0.64  | 3   | 0.19  |   |
| 12950 | Zfp709l1       | -3.44 | 3   | 0.83  | 5   | 0.24  |   |
| 12951 | Zp4            | -3.44 | 5   | 0.73  | 2   | 0.21  |   |
| 12952 | Lhfp           | -3.47 | 671 | 49.38 | 110 | 14.25 |   |
| 12953 | Btbd3          | -3.47 | 237 | 23.59 | 45  | 6.79  |   |
| 12954 | Tead3          | -3.48 | 183 | 8.57  | 35  | 2.47  |   |



Supplemental Table 2  
Vehicle versus FSH, 24 hours

|       | A              | B     | C     | D      | E    | F      | G |
|-------|----------------|-------|-------|--------|------|--------|---|
| 12955 | Fstl1          | -3.48 | 2227  | 115.27 | 431  | 33.08  |   |
| 12956 | AABR07015078.1 | -3.49 | 0     | 46.07  | 0    | 13.21  |   |
| 12957 | Rassf8         | -3.49 | 620   | 24.58  | 117  | 7.05   |   |
| 12958 | Fam169b        | -3.49 | 84    | 5.47   | 20   | 1.56   |   |
| 12959 | Sept5          | -3.5  | 140   | 8.55   | 26   | 2.44   |   |
| 12960 | Esyt1          | -3.5  | 2059  | 144.85 | 402  | 41.41  |   |
| 12961 | Elk3           | -3.5  | 65    | 3.65   | 14   | 1.04   |   |
| 12962 | LOC680121      | -3.52 | 2     | 10.92  | 0    | 3.1    |   |
| 12963 | Csrnp1         | -3.53 | 214   | 15.94  | 48   | 4.51   |   |
| 12964 | AABR07036855.1 | -3.54 | 29    | 16.08  | 8    | 4.54   |   |
| 12965 | Cep55          | -3.54 | 38    | 3.6    | 9    | 1.02   |   |
| 12966 | Avpi1          | -3.54 | 138   | 33.1   | 31   | 9.35   |   |
| 12967 | Itga1          | -3.54 | 408   | 19.06  | 82   | 5.38   |   |
| 12968 | S100a6         | -3.54 | 359   | 184.76 | 70   | 52.16  |   |
| 12969 | Tns1           | -3.54 | 264   | 9.86   | 66   | 2.78   |   |
| 12970 | Junb           | -3.54 | 103   | 14.39  | 20   | 4.06   |   |
| 12971 | Slc12a2        | -3.55 | 1134  | 39.51  | 234  | 11.14  |   |
| 12972 | Peak1          | -3.55 | 939   | 23.28  | 210  | 6.56   |   |
| 12973 | Maml2          | -3.56 | 245   | 4.38   | 61   | 1.23   |   |
| 12974 | Mrap2          | -3.57 | 200   | 16.23  | 54   | 4.54   |   |
| 12975 | Lims1          | -3.58 | 482   | 48.82  | 96   | 13.64  |   |
| 12976 | Ahnak          | -3.61 | 5614  | 77.28  | 1061 | 21.41  |   |
| 12977 | Fam131b        | -3.61 | 21    | 1.3    | 4    | 0.36   |   |
| 12978 | Procr          | -3.62 | 411   | 66.95  | 79   | 18.47  |   |
| 12979 | Ripk2          | -3.63 | 219   | 11.86  | 46   | 3.27   |   |
| 12980 | Hspa4l         | -3.64 | 40    | 2.22   | 9    | 0.61   |   |
| 12981 | Itgb8          | -3.64 | 63    | 2.64   | 15   | 0.73   |   |
| 12982 | Plcx2          | -3.64 | 47    | 1.17   | 7    | 0.32   |   |
| 12983 | Specc1         | -3.64 | 648   | 14.71  | 135  | 4.04   |   |
| 12984 | Popdc2         | -3.65 | 100   | 5.94   | 23   | 1.63   |   |
| 12985 | Tns2           | -3.65 | 56    | 3.14   | 15   | 0.86   |   |
| 12986 | Asb4           | -3.67 | 22    | 1.14   | 9    | 0.31   |   |
| 12987 | Homer1         | -3.67 | 114   | 5.45   | 35   | 1.49   |   |
| 12988 | Mob3b          | -3.67 | 103   | 7.02   | 19   | 1.91   |   |
| 12989 | Rps2-ps6       | -3.67 | 5     | 53.09  | 2    | 14.47  |   |
| 12990 | Dzip1l         | -3.67 | 238   | 13.42  | 51   | 3.66   |   |
| 12991 | Eda            | -3.67 | 51    | 1.1    | 23   | 0.3    |   |
| 12992 | Esrp2          | -3.67 | 16    | 1      | 3    | 0.27   |   |
| 12993 | Lnp            | -3.67 | 100   | 7.86   | 29   | 2.14   |   |
| 12994 | Vldlr          | -3.69 | 1457  | 102.31 | 276  | 27.76  |   |
| 12995 | Mllt11         | -3.69 | 211   | 29.39  | 49   | 7.96   |   |
| 12996 | Fstl3          | -3.72 | 28    | 3.55   | 5    | 0.95   |   |
| 12997 | Cobl           | -3.72 | 320   | 11.02  | 79   | 2.96   |   |
| 12998 | Cdk6           | -3.72 | 355   | 24.32  | 100  | 6.53   |   |
| 12999 | Flna           | -3.74 | 25552 | 749.66 | 4694 | 200.36 |   |
| 13000 | Egr1           | -3.75 | 529   | 42.03  | 95   | 11.22  |   |
| 13001 | Wipf1          | -3.75 | 103   | 6.5    | 20   | 1.73   |   |
| 13002 | Mthfd1l        | -3.75 | 201   | 10.54  | 47   | 2.81   |   |
| 13003 | Myo10          | -3.75 | 2548  | 79.63  | 502  | 21.21  |   |
| 13004 | Akap2          | -3.76 | 1029  | 64.51  | 194  | 17.15  |   |
| 13005 | Mef2c          | -3.77 | 394   | 11.43  | 72   | 3.03   |   |
| 13006 | Tjp2           | -3.78 | 257   | 10.24  | 55   | 2.71   |   |
| 13007 | Fxyd5          | -3.78 | 11    | 2.74   | 2    | 0.72   |   |
| 13008 | AABR07043365.1 | -3.78 | 9     | 1.39   | 3    | 0.37   |   |

Supplemental Table 2  
Vehicle versus FSH, 24 hours

|       | A              | B     | C     | D       | E    | F      | G |
|-------|----------------|-------|-------|---------|------|--------|---|
| 13009 | Igfbp7         | -3.78 | 186   | 29.85   | 65   | 7.89   |   |
| 13010 | Lpar1          | -3.78 | 13    | 0.83    | 4    | 0.22   |   |
| 13011 | Uqcr10_2       | -3.78 | 11    | 14.28   | 2    | 3.77   |   |
| 13012 | Kcnb2          | -3.78 | 11    | 1.27    | 2    | 0.33   |   |
| 13013 | Krtap1-5       | -3.78 | 10    | 4.41    | 2    | 1.17   |   |
| 13014 | Rn60_20_0058.5 | -3.78 | 7     | 3.4     | 0    | 0.9    |   |
| 13015 | Coro1c         | -3.8  | 981   | 66.09   | 185  | 17.4   |   |
| 13016 | Pcdh7          | -3.81 | 1117  | 70.8    | 205  | 18.61  |   |
| 13017 | Lrig1          | -3.81 | 460   | 32.64   | 93   | 8.57   |   |
| 13018 | Slc35f1        | -3.81 | 80    | 4.39    | 18   | 1.15   |   |
| 13019 | Tagln2         | -3.82 | 2450  | 463.94  | 434  | 121.43 |   |
| 13020 | Smtn           | -3.82 | 559   | 43.1    | 104  | 11.28  |   |
| 13021 | Acta1          | -3.82 | 48    | 8.68    | 9    | 2.27   |   |
| 13022 | Ntn4           | -3.83 | 667   | 53.84   | 125  | 14.06  |   |
| 13023 | Flrt2          | -3.83 | 461   | 32.05   | 89   | 8.37   |   |
| 13024 | Rpl30          | -3.83 | 12    | 27.92   | 1    | 7.28   |   |
| 13025 | Arid3b         | -3.85 | 55    | 1.71    | 18   | 0.44   |   |
| 13026 | Ccdc80         | -3.85 | 61    | 3.41    | 12   | 0.88   |   |
| 13027 | Styx           | -3.85 | 83    | 5.78    | 56   | 1.5    |   |
| 13028 | Lmna           | -3.85 | 1583  | 117.79  | 276  | 30.56  |   |
| 13029 | LOC100911693   | -3.87 | 2     | 9.96    | 0    | 2.58   |   |
| 13030 | Myh10          | -3.87 | 18104 | 575.73  | 3284 | 148.91 |   |
| 13031 | AABR07042903.1 | -3.87 | 3     | 12.57   | 1    | 3.25   |   |
| 13032 | AABR07039234.1 | -3.9  | 11    | 2.44    | 2    | 0.62   |   |
| 13033 | Fam114a111     | -3.9  | 12    | 2.4     | 2    | 0.62   |   |
| 13034 | Fas            | -3.9  | 23    | 1.66    | 8    | 0.43   |   |
| 13035 | LOC100911305   | -3.9  | 0     | 2.41    | 0    | 0.62   |   |
| 13036 | Nxf2           | -3.9  | 19    | 1.96    | 3    | 0.5    |   |
| 13037 | Plscr1         | -3.9  | 22    | 1.62    | 6    | 0.41   |   |
| 13038 | Prx            | -3.9  | 58    | 2.75    | 11   | 0.7    |   |
| 13039 | RGD1564899     | -3.9  | 17    | 0.91    | 3    | 0.23   |   |
| 13040 | Fzd7           | -3.91 | 90    | 8.04    | 16   | 2.05   |   |
| 13041 | Clic4          | -3.92 | 950   | 175.75  | 172  | 44.87  |   |
| 13042 | Brms1_1        | -3.92 | 13    | 11.27   | 0    | 2.87   |   |
| 13043 | Wwc1           | -3.92 | 207   | 7.72    | 42   | 1.97   |   |
| 13044 | Cd55           | -3.93 | 160   | 7.81    | 30   | 1.99   |   |
| 13045 | Slc9a3r2       | -3.93 | 45    | 4.64    | 7    | 1.18   |   |
| 13046 | Srf            | -3.93 | 711   | 40.62   | 128  | 10.32  |   |
| 13047 | Itga2          | -3.94 | 191   | 9.63    | 43   | 2.44   |   |
| 13048 | Myo1c          | -3.95 | 2990  | 189.32  | 511  | 47.97  |   |
| 13049 | Lima1          | -3.95 | 301   | 14.14   | 60   | 3.58   |   |
| 13050 | Tmsb4x         | -3.95 | 3969  | 1833.93 | 675  | 463.86 |   |
| 13051 | AABR07059632.3 | -3.96 | 4     | 1.32    | 1    | 0.33   |   |
| 13052 | RGD1310587     | -3.96 | 25    | 2.1     | 4    | 0.53   |   |
| 13053 | Dgkh           | -3.96 | 44    | 1.43    | 12   | 0.36   |   |
| 13054 | Gnat1          | -3.98 | 53    | 5.97    | 9    | 1.5    |   |
| 13055 | Rpl26-ps2      | -3.98 | 4     | 29.58   | 1    | 7.44   |   |
| 13056 | Pomp           | -3.99 | 4     | 69.72   | 0    | 17.49  |   |
| 13057 | Tln1           | -4    | 6823  | 193.61  | 1178 | 48.36  |   |
| 13058 | Adgra2         | -4.01 | 1170  | 61.5    | 187  | 15.35  |   |
| 13059 | Rock2          | -4.02 | 1551  | 48.12   | 288  | 11.98  |   |
| 13060 | Kirrel         | -4.02 | 1274  | 42.51   | 218  | 10.58  |   |
| 13061 | RGD1561161     | -4.02 | 830   | 19.65   | 140  | 4.89   |   |
| 13062 | Rhob           | -4.02 | 1453  | 168.06  | 248  | 41.78  |   |

Supplemental Table 2  
Vehicle versus FSH, 24 hours

|       | A              | B     | C    | D       | E   | F      | G |
|-------|----------------|-------|------|---------|-----|--------|---|
| 13063 | Myo1f          | -4.03 | 89   | 2.68    | 20  | 0.66   |   |
| 13064 | Myrf           | -4.11 | 864  | 37.44   | 146 | 9.1    |   |
| 13065 | AABR07027519.1 | -4.13 | 0    | 5.86    | 0   | 1.42   |   |
| 13066 | AC118147.1     | -4.13 | 0    | 5.47    | 0   | 1.32   |   |
| 13067 | Casp4          | -4.13 | 24   | 2.44    | 3   | 0.59   |   |
| 13068 | Celf2          | -4.13 | 411  | 22.96   | 78  | 5.56   |   |
| 13069 | Chst9          | -4.13 | 41   | 1.69    | 8   | 0.41   |   |
| 13070 | Col4a6         | -4.13 | 44   | 1.52    | 12  | 0.37   |   |
| 13071 | Elovl6_1       | -4.13 | 5    | 5.38    | 0   | 1.3    |   |
| 13072 | Emilin2        | -4.13 | 10   | 0.46    | 8   | 0.11   |   |
| 13073 | Epb4.1l1       | -4.13 | 1    | 0.45    | 0   | 0.11   |   |
| 13074 | Epha5          | -4.13 | 46   | 0.36    | 14  | 0.09   |   |
| 13075 | Fam122a        | -4.13 | 0    | 1.14    | 0   | 0.28   |   |
| 13076 | Fbxo15         | -4.13 | 14   | 0.98    | 8   | 0.24   |   |
| 13077 | Larp6          | -4.13 | 7    | 0.64    | 3   | 0.15   |   |
| 13078 | Lgals9         | -4.13 | 15   | 1.92    | 5   | 0.47   |   |
| 13079 | Tead1          | -4.13 | 899  | 47.54   | 177 | 11.51  |   |
| 13080 | Traf5          | -4.13 | 130  | 13.37   | 22  | 3.24   |   |
| 13081 | Vtcn1          | -4.13 | 7    | 0.33    | 2   | 0.08   |   |
| 13082 | AABR07015078.2 | -4.13 | 0    | 3.89    | 0   | 0.94   |   |
| 13083 | AABR07043748.2 | -4.13 | 23   | 6.06    | 10  | 1.47   |   |
| 13084 | Cdc42ep2       | -4.13 | 59   | 10.94   | 10  | 2.65   |   |
| 13085 | Cntn3          | -4.13 | 14   | 0.36    | 10  | 0.09   |   |
| 13086 | Etv4           | -4.13 | 31   | 2.47    | 4   | 0.6    |   |
| 13087 | Fancf          | -4.13 | 6    | 1.47    | 1   | 0.36   |   |
| 13088 | Il17d          | -4.13 | 20   | 2.39    | 3   | 0.58   |   |
| 13089 | Klf2           | -4.13 | 18   | 4.25    | 3   | 1.03   |   |
| 13090 | LOC679576      | -4.13 | 6    | 3.89    | 1   | 0.94   |   |
| 13091 | LOC689959      | -4.13 | 28   | 3.33    | 4   | 0.81   |   |
| 13092 | Mylk3          | -4.13 | 8    | 0.54    | 2   | 0.13   |   |
| 13093 | Pde4a          | -4.13 | 10   | 0.59    | 2   | 0.14   |   |
| 13094 | Pigf           | -4.13 | 63   | 7       | 28  | 1.69   |   |
| 13095 | Praf2          | -4.13 | 58   | 25.2    | 11  | 6.1    |   |
| 13096 | Prkcq          | -4.13 | 13   | 0.44    | 3   | 0.11   |   |
| 13097 | Rn60_20_0046.8 | -4.13 | 5    | 3.29    | 1   | 0.8    |   |
| 13098 | Sh3bgrl2       | -4.13 | 61   | 4.12    | 48  | 1      |   |
| 13099 | Slco2a1        | -4.13 | 7    | 0.37    | 1   | 0.09   |   |
| 13100 | Trim72         | -4.13 | 10   | 0.63    | 2   | 0.15   |   |
| 13101 | Myof           | -4.15 | 2067 | 56.99   | 336 | 13.73  |   |
| 13102 | Ppp1r18        | -4.17 | 117  | 17.02   | 21  | 4.08   |   |
| 13103 | Klf6           | -4.18 | 1174 | 34      | 274 | 8.13   |   |
| 13104 | Fam84a         | -4.19 | 1023 | 68.47   | 169 | 16.36  |   |
| 13105 | Ptger2         | -4.19 | 93   | 9.28    | 14  | 2.22   |   |
| 13106 | Tuft1          | -4.2  | 155  | 8.94    | 31  | 2.13   |   |
| 13107 | Potef          | -4.21 | 4837 | 2842.27 | 802 | 674.81 |   |
| 13108 | Ajuba          | -4.22 | 636  | 44.46   | 106 | 10.54  |   |
| 13109 | Arhgef26       | -4.23 | 202  | 7.14    | 32  | 1.69   |   |
| 13110 | Plcb1          | -4.23 | 87   | 2.18    | 23  | 0.52   |   |
| 13111 | Fras1          | -4.24 | 174  | 3.32    | 37  | 0.78   |   |
| 13112 | Colec12        | -4.24 | 57   | 3.19    | 25  | 0.75   |   |
| 13113 | Ras2           | -4.25 | 360  | 31.16   | 55  | 7.33   |   |
| 13114 | AABR07040690.1 | -4.26 | 167  | 34.38   | 28  | 8.07   |   |
| 13115 | Enox1          | -4.27 | 69   | 2.66    | 24  | 0.62   |   |
| 13116 | Rab3gap2       | -4.27 | 859  | 36.5    | 141 | 8.55   |   |

Supplemental Table 2  
Vehicle versus FSH, 24 hours

|       | A               | B     | C     | D      | E    | F     | G |
|-------|-----------------|-------|-------|--------|------|-------|---|
| 13117 | Cdr2            | -4.29 | 215   | 19.84  | 33   | 4.62  |   |
| 13118 | Arhgap21        | -4.29 | 1912  | 63.2   | 328  | 14.73 |   |
| 13119 | RGD1560017      | -4.33 | 36    | 20.65  | 4    | 4.77  |   |
| 13120 | Zyx             | -4.34 | 2910  | 262.12 | 449  | 60.44 |   |
| 13121 | Casp12          | -4.36 | 76    | 6.94   | 16   | 1.59  |   |
| 13122 | Ier5            | -4.36 | 209   | 34.61  | 31   | 7.94  |   |
| 13123 | Klhl31          | -4.36 | 19    | 0.77   | 4    | 0.18  |   |
| 13124 | Mettl18         | -4.36 | 19    | 3.15   | 3    | 0.72  |   |
| 13125 | Nsun4_2         | -4.36 | 1     | 3.08   | 0    | 0.71  |   |
| 13126 | PVR             | -4.36 | 315   | 27.75  | 47   | 6.36  |   |
| 13127 | AABR07063424.1  | -4.37 | 0     | 53.96  | 0    | 12.33 |   |
| 13128 | Bgn             | -4.39 | 1212  | 123.04 | 189  | 28.06 |   |
| 13129 | Myadm           | -4.39 | 2107  | 181.85 | 330  | 41.42 |   |
| 13130 | Cracr2b_2       | -4.4  | 8     | 5.04   | 1    | 1.14  |   |
| 13131 | Msr3            | -4.41 | 654   | 32.75  | 118  | 7.43  |   |
| 13132 | Psat1           | -4.42 | 81    | 6.79   | 14   | 1.54  |   |
| 13133 | Pkp2            | -4.45 | 968   | 67.76  | 140  | 15.22 |   |
| 13134 | AC120246.2      | -4.45 | 142   | 18.65  | 22   | 4.19  |   |
| 13135 | LOC100364191    | -4.47 | 4     | 8.24   | 0    | 1.84  |   |
| 13136 | AC110709.1      | -4.47 | 2     | 8.12   | 0    | 1.81  |   |
| 13137 | Arid5a          | -4.47 | 81    | 6.02   | 11   | 1.34  |   |
| 13138 | ENSRNOG00000050 | -4.47 | 103   | 3.65   | 38   | 0.82  |   |
| 13139 | Irf6            | -4.47 | 68    | 4      | 11   | 0.9   |   |
| 13140 | Ppfia2          | -4.47 | 25    | 0.94   | 15   | 0.21  |   |
| 13141 | Xirp1           | -4.47 | 13    | 0.54   | 3    | 0.12  |   |
| 13142 | Map1b           | -4.47 | 11991 | 229.05 | 1856 | 51.2  |   |
| 13143 | Rai14           | -4.47 | 1451  | 66.31  | 226  | 14.82 |   |
| 13144 | Flnb            | -4.49 | 3298  | 85.16  | 520  | 18.95 |   |
| 13145 | Synj2           | -4.51 | 424   | 15.98  | 73   | 3.54  |   |
| 13146 | AABR07024972.1  | -4.53 | 125   | 37.89  | 19   | 8.37  |   |
| 13147 | Ras111b         | -4.53 | 412   | 53.64  | 64   | 11.84 |   |
| 13148 | Dnajb4          | -4.53 | 696   | 62.78  | 112  | 13.85 |   |
| 13149 | Col12a1         | -4.54 | 1847  | 37.97  | 273  | 8.37  |   |
| 13150 | Asns            | -4.54 | 288   | 31.01  | 44   | 6.83  |   |
| 13151 | Cnn3            | -4.56 | 3015  | 342.7  | 461  | 75.14 |   |
| 13152 | Hivep1          | -4.56 | 358   | 14.09  | 50   | 3.09  |   |
| 13153 | Btc             | -4.59 | 24    | 2.02   | 5    | 0.44  |   |
| 13154 | Grip1           | -4.59 | 43    | 1.11   | 7    | 0.24  |   |
| 13155 | LOC100365810    | -4.59 | 6     | 73.28  | 1    | 15.97 |   |
| 13156 | Mob3a           | -4.59 | 226   | 18.15  | 38   | 3.96  |   |
| 13157 | Mb21d1          | -4.59 | 29    | 3.25   | 4    | 0.71  |   |
| 13158 | Slc7a1          | -4.59 | 522   | 17.92  | 85   | 3.9   |   |
| 13159 | Piezo2          | -4.63 | 160   | 3.69   | 29   | 0.8   |   |
| 13160 | Pdha11          | -4.65 | 25    | 6.6    | 3    | 1.42  |   |
| 13161 | Sulf1           | -4.65 | 700   | 26.99  | 104  | 5.8   |   |
| 13162 | Palld           | -4.66 | 463   | 22.44  | 85   | 4.81  |   |
| 13163 | Trib3           | -4.66 | 65    | 7.85   | 10   | 1.68  |   |
| 13164 | Mylk            | -4.7  | 392   | 10.2   | 63   | 2.17  |   |
| 13165 | Kif18a          | -4.7  | 108   | 5.84   | 19   | 1.24  |   |
| 13166 | Tdrd7           | -4.78 | 2693  | 123.76 | 374  | 25.91 |   |
| 13167 | Rbpms           | -4.79 | 343   | 32.14  | 61   | 6.72  |   |
| 13168 | AABR07001233.1  | -4.82 | 115   | 1.39   | 61   | 0.29  |   |
| 13169 | AABR07002564.1  | -4.82 | 3     | 6.12   | 1    | 1.27  |   |
| 13170 | Adm2            | -4.82 | 7     | 1.7    | 2    | 0.35  |   |

Supplemental Table 2  
Vehicle versus FSH, 24 hours

|       | A               | B     | C     | D       | E    | F      | G |
|-------|-----------------|-------|-------|---------|------|--------|---|
| 13171 | Ccsap           | -4.82 | 11    | 1.13    | 3    | 0.23   |   |
| 13172 | Gas1            | -4.82 | 14    | 3.03    | 2    | 0.63   |   |
| 13173 | Il12a           | -4.82 | 8     | 1.2     | 2    | 0.25   |   |
| 13174 | Lypd6           | -4.82 | 12    | 0.48    | 1    | 0.1    |   |
| 13175 | Rgs10           | -4.82 | 10    | 2.07    | 1    | 0.43   |   |
| 13176 | Set             | -4.82 | 8     | 7.67    | 2    | 1.59   |   |
| 13177 | Snai1           | -4.82 | 7     | 0.95    | 2    | 0.2    |   |
| 13178 | Svip            | -4.82 | 8     | 1.48    | 2    | 0.31   |   |
| 13179 | Tmem204         | -4.82 | 12    | 2.96    | 2    | 0.61   |   |
| 13180 | AABR07054593.1  | -4.82 | 16    | 1.88    | 3    | 0.39   |   |
| 13181 | Cacna1b         | -4.82 | 12    | 0.18    | 5    | 0.04   |   |
| 13182 | Cd38            | -4.82 | 15    | 1.55    | 2    | 0.32   |   |
| 13183 | Clec14a         | -4.82 | 14    | 1.11    | 2    | 0.23   |   |
| 13184 | Itga2b          | -4.82 | 15    | 0.53    | 7    | 0.11   |   |
| 13185 | Kazn            | -4.82 | 219   | 5.81    | 56   | 1.21   |   |
| 13186 | Lrrn4           | -4.82 | 8     | 0.68    | 1    | 0.14   |   |
| 13187 | Map3k8          | -4.82 | 11    | 0.6     | 2    | 0.13   |   |
| 13188 | Rhoj            | -4.82 | 33    | 1.95    | 13   | 0.41   |   |
| 13189 | Sphkap          | -4.82 | 19    | 0.48    | 3    | 0.1    |   |
| 13190 | Myl12a          | -4.82 | 13058 | 3550.48 | 1835 | 736.78 |   |
| 13191 | Nid1            | -4.83 | 622   | 26.36   | 97   | 5.46   |   |
| 13192 | Sema3e          | -4.83 | 777   | 21.01   | 127  | 4.35   |   |
| 13193 | Shroom3         | -4.89 | 115   | 2.28    | 22   | 0.47   |   |
| 13194 | Bcar1           | -4.9  | 2075  | 145.2   | 288  | 29.63  |   |
| 13195 | Dusp8           | -4.9  | 60    | 7.25    | 8    | 1.48   |   |
| 13196 | Wnk3            | -4.97 | 206   | 7.28    | 30   | 1.47   |   |
| 13197 | Grb10           | -4.99 | 35    | 1.38    | 5    | 0.28   |   |
| 13198 | Glipr2          | -5    | 179   | 37.37   | 28   | 7.48   |   |
| 13199 | Col14a1         | -5    | 1077  | 46.41   | 159  | 9.28   |   |
| 13200 | Dstn            | -5.02 | 2886  | 469.07  | 411  | 93.42  |   |
| 13201 | Amotl2          | -5.04 | 2913  | 145.81  | 408  | 28.96  |   |
| 13202 | Mgp             | -5.05 | 23    | 8.11    | 3    | 1.61   |   |
| 13203 | Tinagl1         | -5.05 | 303   | 30.24   | 42   | 5.99   |   |
| 13204 | Nhs             | -5.06 | 148   | 5.43    | 20   | 1.07   |   |
| 13205 | Rnd3            | -5.09 | 2421  | 176.54  | 309  | 34.67  |   |
| 13206 | Hacd1           | -5.11 | 199   | 17.97   | 27   | 3.52   |   |
| 13207 | LOC499339       | -5.13 | 158   | 33.45   | 45   | 6.52   |   |
| 13208 | P4ha3           | -5.13 | 397   | 41.43   | 53   | 8.07   |   |
| 13209 | Icam1           | -5.16 | 17    | 1.41    | 2    | 0.27   |   |
| 13210 | Aig1            | -5.16 | 63    | 2.63    | 13   | 0.51   |   |
| 13211 | Exosc3          | -5.16 | 17    | 4.34    | 2    | 0.84   |   |
| 13212 | Fosb            | -5.16 | 22    | 1       | 2    | 0.19   |   |
| 13213 | LOC690276       | -5.16 | 20    | 2.69    | 3    | 0.52   |   |
| 13214 | MGC105567       | -5.16 | 18    | 1.76    | 2    | 0.34   |   |
| 13215 | Mmp28           | -5.16 | 31    | 2.37    | 5    | 0.46   |   |
| 13216 | Rassf5          | -5.16 | 29    | 0.98    | 9    | 0.19   |   |
| 13217 | Slc2a6          | -5.16 | 11    | 1.76    | 1    | 0.34   |   |
| 13218 | Trpc1           | -5.16 | 18    | 0.89    | 5    | 0.17   |   |
| 13219 | ENSRNOG00000061 | -5.16 | 19    | 1.04    | 4    | 0.2    |   |
| 13220 | LOC100362814    | -5.16 | 58    | 0.93    | 18   | 0.18   |   |
| 13221 | Mid1            | -5.2  | 255   | 7.62    | 42   | 1.46   |   |
| 13222 | Glipr1          | -5.28 | 57    | 11.31   | 7    | 2.14   |   |
| 13223 | Prune2          | -5.28 | 109   | 5.93    | 11   | 1.12   |   |
| 13224 | Rtkn2           | -5.28 | 43    | 1.62    | 13   | 0.31   |   |

Supplemental Table 2  
Vehicle versus FSH, 24 hours

|       | A              | B     | C    | D      | E    | F      | G |
|-------|----------------|-------|------|--------|------|--------|---|
| 13225 | Spry4          | -5.28 | 50   | 2.41   | 8    | 0.46   |   |
| 13226 | Pdlim7         | -5.29 | 687  | 82.61  | 92   | 15.62  |   |
| 13227 | Dusp14         | -5.33 | 28   | 5.13   | 3    | 0.96   |   |
| 13228 | Atp10a         | -5.37 | 302  | 11.44  | 46   | 2.13   |   |
| 13229 | Ptpn13         | -5.41 | 1323 | 33.83  | 180  | 6.26   |   |
| 13230 | Samd4a         | -5.42 | 672  | 16.66  | 86   | 3.08   |   |
| 13231 | Crim1          | -5.44 | 6829 | 322.09 | 857  | 59.16  |   |
| 13232 | Actn4          | -5.45 | 9410 | 590.28 | 1176 | 108.37 |   |
| 13233 | Fam129a        | -5.47 | 829  | 46.5   | 107  | 8.5    |   |
| 13234 | Cited2         | -5.5  | 1843 | 233.95 | 229  | 42.54  |   |
| 13235 | AABR07015080.2 | -5.51 | 0    | 53.35  | 0    | 9.69   |   |
| 13236 | Adamts14       | -5.51 | 11   | 0.4    | 2    | 0.07   |   |
| 13237 | Arhgef37       | -5.51 | 22   | 0.52   | 8    | 0.09   |   |
| 13238 | Dusp10         | -5.51 | 140  | 10.32  | 19   | 1.87   |   |
| 13239 | Eps8l2         | -5.51 | 9    | 0.62   | 2    | 0.11   |   |
| 13240 | Fjx1           | -5.51 | 16   | 1.9    | 2    | 0.34   |   |
| 13241 | LOC100360120   | -5.51 | 210  | 7.38   | 124  | 1.34   |   |
| 13242 | Msantd1        | -5.51 | 9    | 0.4    | 2    | 0.07   |   |
| 13243 | Nrxn1          | -5.51 | 41   | 2.84   | 18   | 0.52   |   |
| 13244 | Ppfia4         | -5.51 | 9    | 0.31   | 2    | 0.06   |   |
| 13245 | RGD1308750     | -5.51 | 2    | 0.95   | 0    | 0.17   |   |
| 13246 | Shroom1        | -5.51 | 8    | 0.64   | 1    | 0.12   |   |
| 13247 | Sptbn2         | -5.51 | 25   | 0.49   | 7    | 0.09   |   |
| 13248 | Timm8a1_1      | -5.51 | 13   | 14.6   | 2    | 2.65   |   |
| 13249 | Afap1l1        | -5.51 | 9    | 0.58   | 2    | 0.11   |   |
| 13250 | Cyp7b1         | -5.51 | 19   | 0.7    | 13   | 0.13   |   |
| 13251 | Dkk2           | -5.51 | 17   | 0.56   | 3    | 0.1    |   |
| 13252 | Mreg           | -5.51 | 8    | 0.68   | 9    | 0.12   |   |
| 13253 | Myc            | -5.51 | 187  | 17.9   | 24   | 3.25   |   |
| 13254 | Rps20          | -5.51 | 0    | 5.58   | 1    | 1.01   |   |
| 13255 | Rps27l3        | -5.51 | 0    | 4.4    | 0    | 0.8    |   |
| 13256 | Sorcs1         | -5.51 | 32   | 0.51   | 14   | 0.09   |   |
| 13257 | Timm9          | -5.51 | 13   | 4.44   | 2    | 0.81   |   |
| 13258 | Fos            | -5.56 | 101  | 15.21  | 13   | 2.73   |   |
| 13259 | Lama5          | -5.58 | 297  | 6.43   | 40   | 1.15   |   |
| 13260 | Dse            | -5.6  | 236  | 10.62  | 26   | 1.9    |   |
| 13261 | Mcam           | -5.7  | 1568 | 130.72 | 187  | 22.95  |   |
| 13262 | Nupr1_2        | -5.7  | 0    | 141.48 | 0    | 24.82  |   |
| 13263 | Fads3          | -5.71 | 658  | 100.39 | 85   | 17.58  |   |
| 13264 | Jag1           | -5.73 | 222  | 9.3    | 25   | 1.62   |   |
| 13265 | Ldb3           | -5.73 | 149  | 2.09   | 10   | 0.36   |   |
| 13266 | Rn60_13_0841.1 | -5.73 | 7    | 5.53   | 1    | 0.96   |   |
| 13267 | ErbB3          | -5.73 | 29   | 1.05   | 2    | 0.18   |   |
| 13268 | Pdlim5         | -5.77 | 444  | 43.64  | 55   | 7.56   |   |
| 13269 | Ier3           | -5.79 | 303  | 58.89  | 36   | 10.17  |   |
| 13270 | Pdlim1         | -5.88 | 1218 | 173.79 | 139  | 29.54  |   |
| 13271 | Nupr1_1        | -5.9  | 0    | 167.02 | 0    | 28.29  |   |
| 13272 | Ehd4           | -5.92 | 1520 | 95     | 171  | 16.05  |   |
| 13273 | Ccny1          | -5.96 | 1107 | 55.75  | 130  | 9.35   |   |
| 13274 | Ppap2a         | -6    | 102  | 10.32  | 21   | 1.72   |   |
| 13275 | Cpe            | -6.05 | 1080 | 112.33 | 120  | 18.58  |   |
| 13276 | Pcgf5          | -6.05 | 233  | 17.5   | 29   | 2.89   |   |
| 13277 | Ildr2          | -6.11 | 199  | 8.93   | 16   | 1.46   |   |
| 13278 | Mthfd2         | -6.14 | 245  | 30.22  | 27   | 4.92   |   |

Supplemental Table 2  
Vehicle versus FSH, 24 hours

|       | A              | B     | C     | D      | E    | F      | G |
|-------|----------------|-------|-------|--------|------|--------|---|
| 13279 | Pclo           | -6.15 | 382   | 5.86   | 46   | 0.95   |   |
| 13280 | Ckmt1b         | -6.19 | 14    | 2.67   | 2    | 0.43   |   |
| 13281 | Gabrq          | -6.19 | 12    | 1.18   | 1    | 0.19   |   |
| 13282 | Igf2bp3        | -6.19 | 17    | 1.05   | 5    | 0.17   |   |
| 13283 | LOC100910255_2 | -6.19 | 6     | 1.47   | 2    | 0.24   |   |
| 13284 | Arid5b         | -6.19 | 1246  | 54.63  | 172  | 8.82   |   |
| 13285 | Camkv          | -6.19 | 18    | 1.24   | 3    | 0.2    |   |
| 13286 | RGD1560687     | -6.19 | 3     | 4.06   | 0    | 0.66   |   |
| 13287 | Tpm4           | -6.23 | 2979  | 661.2  | 335  | 106.11 |   |
| 13288 | Zfp36          | -6.35 | 89    | 11.22  | 9    | 1.77   |   |
| 13289 | Sync           | -6.37 | 134   | 8.55   | 24   | 1.34   |   |
| 13290 | Nfil3          | -6.39 | 154   | 16.53  | 16   | 2.59   |   |
| 13291 | Adm            | -6.4  | 97    | 16.71  | 10   | 2.61   |   |
| 13292 | Fn1            | -6.41 | 17837 | 526.67 | 1926 | 82.23  |   |
| 13293 | Adra1b         | -6.42 | 39    | 2.8    | 7    | 0.44   |   |
| 13294 | Dpysl3         | -6.43 | 1530  | 123.64 | 159  | 19.22  |   |
| 13295 | Scrn1          | -6.47 | 79    | 2.33   | 14   | 0.36   |   |
| 13296 | Fam65b         | -6.54 | 146   | 8.43   | 18   | 1.29   |   |
| 13297 | Tmem108        | -6.54 | 22    | 2.82   | 2    | 0.43   |   |
| 13298 | Cdc42ep3       | -6.57 | 429   | 47.5   | 42   | 7.23   |   |
| 13299 | Tubb6          | -6.6  | 544   | 73.71  | 57   | 11.17  |   |
| 13300 | Cebpd          | -6.65 | 29    | 6.34   | 3    | 0.95   |   |
| 13301 | Trpc5          | -6.65 | 88    | 1.87   | 17   | 0.28   |   |
| 13302 | Fhl1           | -6.67 | 1739  | 148.47 | 177  | 22.27  |   |
| 13303 | Tll1           | -6.72 | 626   | 25.74  | 68   | 3.83   |   |
| 13304 | Actg1          | -6.77 | 43    | 41.31  | 2    | 6.1    |   |
| 13305 | AABR07027272.1 | -6.78 | 54    | 8.91   | 5    | 1.31   |   |
| 13306 | Ppargc1b       | -6.88 | 49    | 2.28   | 7    | 0.33   |   |
| 13307 | Pth2r          | -6.88 | 23    | 1.26   | 5    | 0.18   |   |
| 13308 | LOC100125368   | -6.88 | 0     | 1.66   | 0    | 0.24   |   |
| 13309 | LOC102555453   | -6.88 | 0     | 5      | 0    | 0.73   |   |
| 13310 | Lsp1           | -6.88 | 36    | 6.06   | 6    | 0.88   |   |
| 13311 | Map3k6         | -6.88 | 13    | 0.57   | 1    | 0.08   |   |
| 13312 | Radil          | -6.88 | 19    | 0.68   | 8    | 0.1    |   |
| 13313 | Arl4d          | -6.88 | 21    | 3.61   | 2    | 0.52   |   |
| 13314 | Hlf            | -6.88 | 16    | 2.81   | 4    | 0.41   |   |
| 13315 | Zfp580         | -6.88 | 10    | 4.8    | 1    | 0.7    |   |
| 13316 | Sptb           | -6.96 | 233   | 5.86   | 32   | 0.84   |   |
| 13317 | Cryab          | -6.97 | 308   | 60.69  | 30   | 8.7    |   |
| 13318 | Bves           | -7    | 286   | 20.54  | 20   | 2.94   |   |
| 13319 | Ntng1          | -7.03 | 201   | 5.68   | 23   | 0.81   |   |
| 13320 | Cd44           | -7.05 | 53    | 2.57   | 7    | 0.36   |   |
| 13321 | Cemip          | -7.07 | 1980  | 64.63  | 194  | 9.14   |   |
| 13322 | Tnik           | -7.09 | 151   | 5.31   | 23   | 0.75   |   |
| 13323 | Itgbl1         | -7.11 | 59    | 3.38   | 16   | 0.47   |   |
| 13324 | LOC100911597   | -7.15 | 527   | 456.37 | 90   | 63.79  |   |
| 13325 | Syl2_1         | -7.16 | 137   | 40.61  | 16   | 5.67   |   |
| 13326 | Sorbs1         | -7.17 | 1554  | 39.76  | 146  | 5.55   |   |
| 13327 | Fhl2           | -7.18 | 551   | 73.51  | 49   | 10.24  |   |
| 13328 | Cdc42ep5       | -7.23 | 21    | 9.97   | 2    | 1.38   |   |
| 13329 | Olr1433        | -7.23 | 21    | 5.32   | 2    | 0.74   |   |
| 13330 | Trpc3          | -7.37 | 377   | 11.67  | 39   | 1.58   |   |
| 13331 | Pxdc1          | -7.38 | 598   | 43.36  | 40   | 5.88   |   |
| 13332 | Olfml2b        | -7.42 | 1038  | 77.5   | 95   | 10.44  |   |

Supplemental Table 2  
Vehicle versus FSH, 24 hours

|       | A              | B     | C    | D      | E   | F     | G |
|-------|----------------|-------|------|--------|-----|-------|---|
| 13333 | Mrvi1          | -7.43 | 148  | 4.35   | 12  | 0.59  |   |
| 13334 | Pdlim3         | -7.53 | 598  | 46.06  | 60  | 6.12  |   |
| 13335 | Fam101b        | -7.57 | 25   | 4.03   | 3   | 0.53  |   |
| 13336 | Heyl           | -7.57 | 11   | 0.59   | 2   | 0.08  |   |
| 13337 | Apba1          | -7.57 | 31   | 0.74   | 8   | 0.1   |   |
| 13338 | Dhrs9          | -7.57 | 13   | 0.67   | 1   | 0.09  |   |
| 13339 | Krt80          | -7.57 | 12   | 0.89   | 2   | 0.12  |   |
| 13340 | Hnrnpa3_2      | -7.57 | 3    | 2.56   | 0   | 0.34  |   |
| 13341 | Trib1          | -7.65 | 119  | 12.64  | 11  | 1.65  |   |
| 13342 | Cav2           | -7.71 | 55   | 5.61   | 6   | 0.73  |   |
| 13343 | Gatm           | -7.77 | 256  | 23.36  | 24  | 3.01  |   |
| 13344 | Prkca          | -7.81 | 691  | 23.74  | 82  | 3.04  |   |
| 13345 | Nacad          | -7.82 | 280  | 12.36  | 25  | 1.58  |   |
| 13346 | Sema3a         | -7.9  | 842  | 51.5   | 84  | 6.52  |   |
| 13347 | Ppp1r14c       | -7.91 | 39   | 2.07   | 4   | 0.26  |   |
| 13348 | Fam150a        | -7.91 | 82   | 14.92  | 4   | 1.89  |   |
| 13349 | Pea15          | -8.06 | 220  | 73.43  | 43  | 9.11  |   |
| 13350 | Cyp26b1        | -8.12 | 64   | 3.23   | 6   | 0.4   |   |
| 13351 | Myl9           | -8.15 | 1646 | 366.3  | 137 | 44.93 |   |
| 13352 | Basp1          | -8.16 | 629  | 104.21 | 73  | 12.77 |   |
| 13353 | Csrp1          | -8.17 | 1098 | 139.08 | 85  | 17.01 |   |
| 13354 | Gpr75          | -8.26 | 11   | 1.15   | 1   | 0.14  |   |
| 13355 | Pear1          | -8.26 | 13   | 0.67   | 2   | 0.08  |   |
| 13356 | AABR07004397.1 | -8.26 | 0    | 8.9    | 0   | 1.08  |   |
| 13357 | Cap2           | -8.26 | 43   | 1.35   | 3   | 0.16  |   |
| 13358 | LOC100363537   | -8.26 | 0    | 4.15   | 0   | 0.5   |   |
| 13359 | LOC100911837   | -8.26 | 0    | 0.64   | 0   | 0.08  |   |
| 13360 | LOC100912283   | -8.26 | 15   | 3.39   | 2   | 0.41  |   |
| 13361 | Nuak2          | -8.26 | 13   | 1.04   | 1   | 0.13  |   |
| 13362 | Trpm1          | -8.26 | 24   | 0.59   | 5   | 0.07  |   |
| 13363 | Vasn           | -8.26 | 2    | 1.09   | 0   | 0.13  |   |
| 13364 | Hspb1          | -8.46 | 209  | 59.24  | 17  | 7     |   |
| 13365 | Tspan2         | -8.5  | 412  | 20.88  | 30  | 2.46  |   |
| 13366 | lfrd1          | -8.51 | 1420 | 153.03 | 135 | 17.99 |   |
| 13367 | Tes            | -8.56 | 3182 | 304.55 | 240 | 35.56 |   |
| 13368 | Diaph3         | -8.63 | 512  | 26.7   | 51  | 3.09  |   |
| 13369 | Tnfaip8        | -8.72 | 48   | 3.99   | 6   | 0.46  |   |
| 13370 | Creb5          | -8.77 | 259  | 5.63   | 40  | 0.64  |   |
| 13371 | Bmp4           | -8.83 | 648  | 68.09  | 47  | 7.71  |   |
| 13372 | Tpm1           | -8.83 | 5256 | 316.97 | 399 | 35.9  |   |
| 13373 | Ets1           | -8.91 | 546  | 23.72  | 44  | 2.66  |   |
| 13374 | LOC100910885_2 | -8.95 | 6    | 2.68   | 2   | 0.3   |   |
| 13375 | Cidea          | -8.95 | 20   | 5.93   | 3   | 0.66  |   |
| 13376 | Tlr6           | -8.95 | 10   | 0.46   | 3   | 0.05  |   |
| 13377 | Tmem160        | -8.95 | 27   | 7.91   | 2   | 0.88  |   |
| 13378 | Trpv2          | -8.95 | 15   | 1.16   | 2   | 0.13  |   |
| 13379 | RGD1563962     | -8.95 | 3    | 1.75   | 0   | 0.2   |   |
| 13380 | Cnksr3         | -9.01 | 862  | 37.62  | 74  | 4.18  |   |
| 13381 | Sorbs2         | -9.05 | 1965 | 47.24  | 161 | 5.22  |   |
| 13382 | Dusp4          | -9.12 | 61   | 3.32   | 5   | 0.36  |   |
| 13383 | Alpk3          | -9.14 | 128  | 3.67   | 11  | 0.4   |   |
| 13384 | Rnd1           | -9.19 | 626  | 88.89  | 49  | 9.68  |   |
| 13385 | Pdgrfb         | -9.22 | 72   | 2.93   | 6   | 0.32  |   |
| 13386 | Dtna           | -9.29 | 52   | 1.35   | 9   | 0.14  |   |



Supplemental Table 2  
Vehicle versus FSH, 24 hours

|       | A              | B      | C     | D      | E   | F     | G |
|-------|----------------|--------|-------|--------|-----|-------|---|
| 13387 | Mal2           | -9.32  | 133   | 13.37  | 10  | 1.43  |   |
| 13388 | LOC100363469   | -9.39  | 33    | 102.13 | 2   | 10.88 |   |
| 13389 | Tgfb2          | -9.48  | 4738  | 236.99 | 342 | 24.99 |   |
| 13390 | Sertad4        | -9.52  | 86    | 7.07   | 6   | 0.74  |   |
| 13391 | Runx1t1        | -9.56  | 179   | 4.81   | 19  | 0.5   |   |
| 13392 | Cyr61          | -9.59  | 6171  | 766.46 | 441 | 79.93 |   |
| 13393 | Bcl2           | -9.63  | 71    | 2.96   | 19  | 0.31  |   |
| 13394 | Chac1          | -9.63  | 44    | 6.67   | 3   | 0.69  |   |
| 13395 | Glis3          | -9.63  | 56    | 1.24   | 15  | 0.13  |   |
| 13396 | Otub2          | -9.63  | 21    | 1.26   | 3   | 0.13  |   |
| 13397 | AABR07016577.1 | -9.63  | 4     | 16.61  | 0   | 1.72  |   |
| 13398 | Actc1          | -9.63  | 13    | 2.34   | 1   | 0.24  |   |
| 13399 | Lcp1           | -9.63  | 59    | 3.84   | 7   | 0.4   |   |
| 13400 | LOC681193      | -9.63  | 0     | 3.6    | 0   | 0.37  |   |
| 13401 | RGD1308601     | -9.63  | 10    | 0.7    | 1   | 0.07  |   |
| 13402 | Hbegf          | -9.66  | 799   | 81.94  | 57  | 8.48  |   |
| 13403 | Cnn2           | -9.74  | 840   | 400.93 | 69  | 41.14 |   |
| 13404 | Ptgis          | -9.94  | 287   | 38.22  | 25  | 3.84  |   |
| 13405 | Dusp1          | -9.95  | 900   | 109.78 | 60  | 11.03 |   |
| 13406 | Atp13a3        | -9.98  | 81    | 18.29  | 12  | 1.83  |   |
| 13407 | Nlrp3          | -9.98  | 30    | 1.74   | 2   | 0.17  |   |
| 13408 | Tmem144        | -9.98  | 44    | 2.51   | 5   | 0.25  |   |
| 13409 | Vcl            | -10    | 9702  | 406.35 | 668 | 40.62 |   |
| 13410 | Arhgap24       | -10.15 | 102   | 5.01   | 21  | 0.49  |   |
| 13411 | AABR07058656.1 | -10.32 | 15    | 3.89   | 4   | 0.38  |   |
| 13412 | Vgll3          | -10.52 | 894   | 159.56 | 65  | 15.16 |   |
| 13413 | Stc1           | -10.74 | 1998  | 124.97 | 133 | 11.64 |   |
| 13414 | Ili1r1         | -10.85 | 241   | 12.93  | 21  | 1.19  |   |
| 13415 | Gls2           | -11.01 | 24    | 1.44   | 4   | 0.13  |   |
| 13416 | Hspb2          | -11.01 | 22    | 7.26   | 1   | 0.66  |   |
| 13417 | Cdkn2b         | -11.01 | 25    | 0.71   | 2   | 0.06  |   |
| 13418 | Mns1           | -11.01 | 22    | 2.21   | 7   | 0.2   |   |
| 13419 | AABR07047140.1 | -11.7  | 5     | 12.39  | 0   | 1.06  |   |
| 13420 | Tnnt2          | -11.7  | 19    | 3.5    | 1   | 0.3   |   |
| 13421 | Car9           | -11.7  | 20    | 2.05   | 2   | 0.18  |   |
| 13422 | Serpib1a       | -11.7  | 17    | 3.39   | 1   | 0.29  |   |
| 13423 | Tnfsf18        | -11.7  | 17    | 2.04   | 1   | 0.17  |   |
| 13424 | St8sia2        | -11.81 | 134   | 22.73  | 10  | 1.92  |   |
| 13425 | Gprc5a         | -11.93 | 61    | 6.19   | 3   | 0.52  |   |
| 13426 | Lmcd1          | -11.99 | 614   | 68     | 33  | 5.67  |   |
| 13427 | Tnfrsf11b      | -12.13 | 3780  | 308.88 | 217 | 25.47 |   |
| 13428 | Mcc            | -12.28 | 522   | 38.39  | 40  | 3.13  |   |
| 13429 | Zfp365         | -12.5  | 112   | 5.37   | 6   | 0.43  |   |
| 13430 | Otud1          | -12.62 | 165   | 30.05  | 9   | 2.38  |   |
| 13431 | Serpib2        | -12.73 | 43    | 4.69   | 2   | 0.37  |   |
| 13432 | Ewsr1          | -12.88 | 4     | 55.23  | 0   | 4.29  |   |
| 13433 | Fam198b        | -12.96 | 617   | 32.58  | 35  | 2.51  |   |
| 13434 | Cald1          | -13    | 12781 | 605.2  | 658 | 46.55 |   |
| 13435 | Cpne5          | -13.08 | 26    | 1.1    | 4   | 0.08  |   |
| 13436 | Glb1l2         | -13.08 | 27    | 1.94   | 2   | 0.15  |   |
| 13437 | Sgms2          | -13.08 | 71    | 7.5    | 6   | 0.57  |   |
| 13438 | Actn1          | -13.36 | 11740 | 659.08 | 635 | 49.33 |   |
| 13439 | Lims2          | -13.65 | 268   | 24.38  | 17  | 1.79  |   |
| 13440 | Cav1           | -13.67 | 2296  | 218.58 | 114 | 15.99 |   |

Supplemental Table 2  
Vehicle versus FSH, 24 hours

|       | A              | B       | C     | D       | E   | F      | G |
|-------|----------------|---------|-------|---------|-----|--------|---|
| 13441 | Olah           | -13.76  | 26    | 3.15    | 1   | 0.23   |   |
| 13442 | Tnfrsf12a      | -13.89  | 705   | 172.32  | 34  | 12.41  |   |
| 13443 | Gpc6           | -14.11  | 188   | 4.44    | 47  | 0.31   |   |
| 13444 | Hpd1           | -14.45  | 21    | 3.27    | 1   | 0.23   |   |
| 13445 | Shb            | -14.45  | 67    | 3.47    | 7   | 0.24   |   |
| 13446 | Actg2          | -14.75  | 309   | 52.64   | 15  | 3.57   |   |
| 13447 | Tagln          | -14.76  | 13325 | 2586.44 | 588 | 175.26 |   |
| 13448 | Spink8         | -15.14  | 38    | 6.27    | 3   | 0.41   |   |
| 13449 | Gadd45g        | -15.91  | 406   | 89.84   | 17  | 5.65   |   |
| 13450 | Stard13        | -16.44  | 350   | 9.53    | 65  | 0.58   |   |
| 13451 | Hmga1          | -16.52  | 67    | 36.91   | 3   | 2.23   |   |
| 13452 | Edn1           | -16.71  | 376   | 60.95   | 14  | 3.65   |   |
| 13453 | Penk           | -16.95  | 400   | 57.68   | 16  | 3.4    |   |
| 13454 | Sema3d         | -17.5   | 203   | 8.95    | 15  | 0.51   |   |
| 13455 | Slc7a3         | -17.89  | 27    | 2.13    | 1   | 0.12   |   |
| 13456 | Maff           | -18.01  | 168   | 20.15   | 5   | 1.12   |   |
| 13457 | Tnc            | -18.18  | 674   | 21.9    | 27  | 1.2    |   |
| 13458 | Ankrd1         | -18.47  | 172   | 22.66   | 6   | 1.23   |   |
| 13459 | Trpc4          | -18.58  | 53    | 2.15    | 6   | 0.12   |   |
| 13460 | Bdnf           | -19.11  | 1127  | 35.35   | 40  | 1.85   |   |
| 13461 | Spry1          | -19.5   | 90    | 8.5     | 3   | 0.44   |   |
| 13462 | Nav3           | -19.96  | 427   | 8.54    | 18  | 0.43   |   |
| 13463 | Rgs7bp         | -19.96  | 88    | 14      | 9   | 0.7    |   |
| 13464 | Sept4          | -20.19  | 412   | 24.24   | 16  | 1.2    |   |
| 13465 | Adamts12       | -20.65  | 744   | 17.38   | 30  | 0.84   |   |
| 13466 | Lrrfip1        | -21.27  | 1289  | 74.31   | 43  | 3.49   |   |
| 13467 | Arc            | -21.33  | 30    | 2.55    | 1   | 0.12   |   |
| 13468 | Anxa3          | -21.56  | 215   | 11.97   | 9   | 0.56   |   |
| 13469 | Acta2          | -21.64  | 17925 | 3165.71 | 562 | 146.29 |   |
| 13470 | LOC100359550   | -22.02  | 32    | 22.91   | 1   | 1.04   |   |
| 13471 | F3             | -22.49  | 566   | 71.52   | 16  | 3.18   |   |
| 13472 | Meox2          | -22.71  | 61    | 3.41    | 6   | 0.15   |   |
| 13473 | Akap12         | -22.98  | 861   | 31.58   | 33  | 1.37   |   |
| 13474 | Stmn4          | -23.74  | 97    | 12.17   | 6   | 0.51   |   |
| 13475 | LOC100910163   | -23.86  | 81    | 20.04   | 3   | 0.84   |   |
| 13476 | Ngf            | -24.09  | 62    | 3.95    | 2   | 0.16   |   |
| 13477 | Ctgf           | -24.34  | 16382 | 1507.86 | 463 | 61.95  |   |
| 13478 | Atf3           | -24.54  | 140   | 9.16    | 6   | 0.37   |   |
| 13479 | Wnt16          | -25.46  | 38    | 5.55    | 1   | 0.22   |   |
| 13480 | Myh11          | -26.64  | 318   | 10.09   | 14  | 0.38   |   |
| 13481 | Rrad           | -27.53  | 43    | 6.58    | 1   | 0.24   |   |
| 13482 | Gadd45b        | -29.59  | 95    | 16.48   | 2   | 0.56   |   |
| 13483 | Serpine1       | -32.21  | 239   | 19.04   | 5   | 0.59   |   |
| 13484 | Spats2l        | -32.69  | 430   | 27.45   | 21  | 0.84   |   |
| 13485 | S1pr1          | -40.41  | 412   | 39.83   | 7   | 0.99   |   |
| 13486 | Akap5          | -40.6   | 475   | 43.56   | 8   | 1.07   |   |
| 13487 | Mybpc3         | -44.04  | 215   | 11.49   | 4   | 0.26   |   |
| 13488 | Lmod1          | -49.09  | 294   | 11.85   | 15  | 0.24   |   |
| 13489 | Rasgrp3        | -53.33  | 171   | 8.48    | 10  | 0.16   |   |
| 13490 | Tgfb3          | -68.54  | 549   | 47.38   | 5   | 0.69   |   |
| 13491 | Tpm2           | -70.88  | 348   | 51.67   | 6   | 0.73   |   |
| 13492 | Tnnc1          | -71.8   | 317   | 94.65   | 3   | 1.32   |   |
| 13493 | Cnn1           | -158.97 | 236   | 38.37   | 1   | 0.24   |   |
| 13494 | AABR07003030.2 | -∞      | 34    | 0.19    | 13  | 0      |   |

Supplemental Table 2  
Vehicle versus FSH, 24 hours

|       | A              | B           | C   | D     | E   | F | G |
|-------|----------------|-------------|-----|-------|-----|---|---|
| 13495 | AABR07013701.1 | , -∞, >3.13 | 287 | 3.12  | 5   | 0 |   |
| 13496 | AABR07041724.2 | -∞          | 22  | 4.05  | 10  | 0 |   |
| 13497 | AABR07044408.1 | -∞          | 67  | 1.15  | 37  | 0 |   |
| 13498 | AABR07068650.1 | -∞          | 87  | 0.17  | 78  | 0 |   |
| 13499 | AABR07070046.1 | -∞          | 205 | 0.53  | 47  | 0 |   |
| 13500 | Adam33         | -∞          | 31  | 1.67  | 0   | 0 |   |
| 13501 | Adamts19       | -∞          | 43  | 1.54  | 4   | 0 |   |
| 13502 | Afap1l2        | -∞          | 25  | 1.12  | 4   | 0 |   |
| 13503 | Anks1b         | -∞          | 20  | 0.07  | 21  | 0 |   |
| 13504 | C1qtnf7        | -∞          | 20  | 0.52  | 4   | 0 |   |
| 13505 | Ccdc37         | -∞          | 46  | 1.46  | 9   | 0 |   |
| 13506 | Ccser1         | -∞          | 20  | 0.08  | 12  | 0 |   |
| 13507 | Colq           | -∞          | 34  | 1.27  | 5   | 0 |   |
| 13508 | Cyp2ac1        | -∞          | 28  | 0.5   | 13  | 0 |   |
| 13509 | Dcdc2          | -∞          | 185 | 1.28  | 169 | 0 |   |
| 13510 | Dmgdh          | -∞          | 21  | 0.78  | 4   | 0 |   |
| 13511 | Epha1          | -∞          | 28  | 0.54  | 2   | 0 |   |
| 13512 | Fcgr1a         | -∞          | 67  | 0.17  | 116 | 0 |   |
| 13513 | Fgf14          | -∞, >4.69   | 51  | 4.69  | 3   | 0 |   |
| 13514 | Hdac9          | -∞          | 25  | 0.32  | 20  | 0 |   |
| 13515 | Hmga2          | -∞          | 44  | 1.24  | 10  | 0 |   |
| 13516 | Hmha1          | -∞          | 27  | 0.06  | 10  | 0 |   |
| 13517 | Hs3st5         | -∞          | 38  | 0.33  | 14  | 0 |   |
| 13518 | Htr4           | -∞          | 28  | 0.53  | 0   | 0 |   |
| 13519 | Il12rb2        | -∞          | 40  | 0.31  | 27  | 0 |   |
| 13520 | Lekr1          | -∞          | 26  | 0.1   | 30  | 0 |   |
| 13521 | Lgr6           | -∞          | 50  | 1.98  | 12  | 0 |   |
| 13522 | LOC102546963   | -∞, >7.93   | 23  | 7.93  | 0   | 0 |   |
| 13523 | LOC498231      | -∞          | 27  | 0.36  | 17  | 0 |   |
| 13524 | Lypd1          | -∞, >3.96   | 32  | 3.96  | 1   | 0 |   |
| 13525 | Map3k7cl       | -∞          | 46  | 0.63  | 21  | 0 |   |
| 13526 | Mdga2          | -∞          | 31  | 0.16  | 19  | 0 |   |
| 13527 | Myo1h          | -∞          | 23  | 0.11  | 3   | 0 |   |
| 13528 | Myom1          | -∞          | 35  | 1.38  | 6   | 0 |   |
| 13529 | Nexn           | -∞, >12.04  | 245 | 12.04 | 6   | 0 |   |
| 13530 | Nkain2         | -∞          | 24  | 0.34  | 14  | 0 |   |
| 13531 | Ptprn2         | -∞          | 20  | 0.05  | 25  | 0 |   |
| 13532 | RGD1563323     | -∞          | 22  | 0.17  | 26  | 0 |   |
| 13533 | RGD1565536     | -∞, >4.62   | 33  | 4.62  | 0   | 0 |   |
| 13534 | Rgs7           | -∞          | 40  | 0.1   | 13  | 0 |   |
| 13535 | Rims1          | -∞          | 47  | 0.21  | 20  | 0 |   |
| 13536 | Sntg2          | -∞          | 43  | 1.5   | 9   | 0 |   |
| 13537 | Spag16         | -∞          | 56  | 0.61  | 22  | 0 |   |
| 13538 | Tdrd12         | -∞          | 28  | 0.06  | 23  | 0 |   |
| 13539 | Timd2          | -∞          | 23  | 0.14  | 15  | 0 |   |
| 13540 | Tmem232        | -∞          | 20  | 0.1   | 69  | 0 |   |
| 13541 | Tmem255a       | -∞          | 60  | 0.87  | 48  | 0 |   |
| 13542 | Tmprss11b      | -∞          | 30  | 0.2   | 21  | 0 |   |
| 13543 | Trpc6          | -∞, >7.62   | 135 | 7.62  | 1   | 0 |   |
