# Supplementary material
Source: PubMed Central journal article supplement (PMC4983523)
Supplement: NIHMS800666-supplement-6.pdf [file NIHMS800666-supplement-6.pdf]

Supplemental Table 3  
 FSH + Ad-E versus FSH + Ad-FOXO1(A3), 24 hours

|    | A              | B                                                             | C                                         | D                      | E                                                | F                                     | G                                  |
|----|----------------|---------------------------------------------------------------|-------------------------------------------|------------------------|--------------------------------------------------|---------------------------------------|------------------------------------|
| 1  | Feature ID     | Fold Change:<br>FSH + Ad-<br>FOXO1(A3)/<br>FSH + Ad-E<br>RPKM | FSH +<br>Ad-E:<br>Unique<br>gene<br>reads | FSH +<br>Ad-E:<br>RPKM | FSH + Ad-<br>FOXO1(A3)<br>: Unique<br>gene reads | FSH<br>+Ad-<br>FOXO1<br>(A3):<br>RPKM |                                    |
| 2  | AABR07006049.1 | ∞                                                             | 665                                       | 0                      | 798                                              | 0.09                                  | Genes up-regulated by Ad FOXO1(A3) |
| 3  | AABR07013701.1 | ∞                                                             | 5                                         | 0                      | 65                                               | 0.38                                  |                                    |
| 4  | AABR07014218.1 | ∞                                                             | 479                                       | 0                      | 588                                              | 0.49                                  |                                    |
| 5  | AABR07041724.2 | ∞                                                             | 10                                        | 0                      | 23                                               | 2.2                                   |                                    |
| 6  | AABR07070046.1 | ∞                                                             | 47                                        | 0                      | 89                                               | 0.57                                  |                                    |
| 7  | Agt            | ∞                                                             | 15                                        | 0                      | 27                                               | 0.84                                  |                                    |
| 8  | Arhgap15       | ∞                                                             | 11                                        | 0                      | 24                                               | 0.16                                  |                                    |
| 9  | C1qtnf7        | ∞                                                             | 4                                         | 0                      | 39                                               | 0.57                                  |                                    |
| 10 | Ccdc37         | ∞                                                             | 9                                         | 0                      | 28                                               | 0.66                                  |                                    |
| 11 | Cdh23          | ∞                                                             | 35                                        | 0                      | 79                                               | 0.03                                  |                                    |
| 12 | Dcdc2          | ∞                                                             | 169                                       | 0                      | 164                                              | 0.16                                  |                                    |
| 13 | Dgki           | ∞                                                             | 11                                        | 0                      | 23                                               | 0.07                                  |                                    |
| 14 | Fam71e1        | ∞                                                             | 11                                        | 0                      | 22                                               | 0.87                                  |                                    |
| 15 | Fgf14          | ∞, >2.18                                                      | 3                                         | 0                      | 40                                               | 2.18                                  |                                    |
| 16 | Foxn1          | ∞                                                             | 41                                        | 0                      | 33                                               | 0.24                                  |                                    |
| 17 | Ghrl           | ∞                                                             | 16                                        | 0                      | 27                                               | 1.08                                  |                                    |
| 18 | Hcn1           | ∞                                                             | 12                                        | 0                      | 26                                               | 0.49                                  |                                    |
| 19 | Hormad2        | ∞                                                             | 22                                        | 0                      | 32                                               | 0.13                                  |                                    |
| 20 | Hs3st5         | ∞                                                             | 14                                        | 0                      | 84                                               | 1.07                                  |                                    |
| 21 | Htra4          | ∞                                                             | 3                                         | 0                      | 32                                               | 1.8                                   |                                    |
| 22 | Ica1l          | ∞                                                             | 9                                         | 0                      | 21                                               | 0.16                                  |                                    |
| 23 | Ii12rb2        | ∞                                                             | 27                                        | 0                      | 35                                               | 0.51                                  |                                    |
| 24 | Lekr1          | ∞                                                             | 30                                        | 0                      | 28                                               | 0.32                                  |                                    |
| 25 | LOC100361645   | ∞                                                             | 28                                        | 0                      | 31                                               | 0.31                                  |                                    |
| 26 | LOC100911679   | ∞                                                             | 45                                        | 0                      | 76                                               | 0.39                                  |                                    |
| 27 | LOC361914      | ∞                                                             | 30                                        | 0                      | 38                                               | 0.31                                  |                                    |
| 28 | LOC498231      | ∞                                                             | 17                                        | 0                      | 22                                               | 1.18                                  |                                    |
| 29 | LOC499643      | ∞                                                             | 24                                        | 0                      | 29                                               | 0.12                                  |                                    |
| 30 | LOC500990      | ∞                                                             | 32                                        | 0                      | 36                                               | 0.16                                  |                                    |
| 31 | LOC691141      | ∞                                                             | 18                                        | 0                      | 34                                               | 0.42                                  |                                    |
| 32 | LOC691162      | ∞                                                             | 21                                        | 0                      | 35                                               | 0.27                                  |                                    |
| 33 | Lsamp          | ∞                                                             | 19                                        | 0                      | 25                                               | 0.7                                   |                                    |
| 34 | Ltbp2          | ∞                                                             | 5                                         | 0                      | 31                                               | 1.01                                  |                                    |
| 35 | Malrd1         | ∞                                                             | 13                                        | 0                      | 24                                               | 0.1                                   |                                    |
| 36 | Mdga2          | ∞                                                             | 19                                        | 0                      | 28                                               | 0.09                                  |                                    |
| 37 | Musk           | ∞                                                             | 13                                        | 0                      | 35                                               | 0.76                                  |                                    |
| 38 | Nexn           | ∞                                                             | 6                                         | 0                      | 58                                               | 2.92                                  |                                    |
| 39 | Ntn1           | ∞                                                             | 9                                         | 0                      | 28                                               | 0.73                                  |                                    |
| 40 | Poln           | ∞                                                             | 16                                        | 0                      | 22                                               | 0.1                                   |                                    |
| 41 | Pstpip2        | ∞                                                             | 18                                        | 0                      | 25                                               | 0.17                                  |                                    |
| 42 | RGD1563323     | ∞                                                             | 26                                        | 0                      | 43                                               | 0.19                                  |                                    |
| 43 | Rims1          | ∞                                                             | 20                                        | 0                      | 22                                               | 0.09                                  |                                    |
| 44 | Rtn1           | ∞                                                             | 6                                         | 0                      | 20                                               | 0.5                                   |                                    |
| 45 | Sla2           | ∞                                                             | 85                                        | 0                      | 106                                              | 0.19                                  |                                    |
| 46 | Sntg2          | ∞                                                             | 9                                         | 0                      | 22                                               | 0.63                                  |                                    |
| 47 | Sytl3          | ∞                                                             | 18                                        | 0                      | 41                                               | 0.12                                  |                                    |
| 48 | Tmem232        | ∞                                                             | 69                                        | 0                      | 110                                              | 0.11                                  |                                    |

Supplemental Table 3  
 FSH + Ad-E versus FSH + Ad-FOXO1(A3), 24 hours

|     | A              | B     | C   | D     | E    | F      | G                                            |
|-----|----------------|-------|-----|-------|------|--------|----------------------------------------------|
| 49  | Tmem255a       | ∞     | 48  | 0     | 70   | 0.16   | Genes used for<br>Pathway Studio<br>Analysis |
| 50  | Meox2          | 29.9  | 6   | 0.15  | 75   | 4.5    |                                              |
| 51  | Trpc4          | 24.67 | 6   | 0.12  | 56   | 2.86   |                                              |
| 52  | Serpib1a       | 22.43 | 1   | 0.29  | 30   | 6.49   |                                              |
| 53  | Cnn1           | 14.95 | 1   | 0.24  | 20   | 3.61   |                                              |
| 54  | Bcl2           | 14.2  | 19  | 0.31  | 48   | 4.36   |                                              |
| 55  | LOC100910373   | 14.2  | 1   | 0.14  | 6    | 2.04   |                                              |
| 56  | Ewsr1          | 12.26 | 0   | 4.29  | 4    | 52.56  |                                              |
| 57  | Rragd          | 11.96 | 1   | 0.25  | 27   | 3      |                                              |
| 58  | SNORD88_3      | 11.96 | 1   | 4.02  | 16   | 48.12  |                                              |
| 59  | Apba1          | 11.21 | 8   | 0.1   | 46   | 1.1    |                                              |
| 60  | LOC100359550   | 11.21 | 1   | 1.04  | 15   | 11.67  |                                              |
| 61  | LOC688754      | 10.47 | 0   | 0.43  | 5    | 4.48   |                                              |
| 62  | Lpar1          | 10.47 | 4   | 0.22  | 39   | 2.3    |                                              |
| 63  | LOC100363537   | 10.47 | 0   | 0.5   | 1    | 5.26   |                                              |
| 64  | Aatk           | 9.72  | 3   | 0.07  | 19   | 0.67   |                                              |
| 65  | Cage1          | 9.72  | 7   | 0.13  | 19   | 1.23   |                                              |
| 66  | Rbks           | 9.72  | 16  | 0.26  | 34   | 2.49   |                                              |
| 67  | Shb            | 9.72  | 7   | 0.24  | 44   | 2.34   |                                              |
| 68  | Cd38           | 8.97  | 2   | 0.32  | 27   | 2.89   |                                              |
| 69  | AABR07015505.1 | 8.97  | 0   | 0.57  | 1    | 5.13   |                                              |
| 70  | Cd36           | 8.97  | 3   | 0.04  | 6    | 0.37   |                                              |
| 71  | Lmod1          | 8.72  | 15  | 0.24  | 71   | 2.1    |                                              |
| 72  | Tnfrsf11b      | 8.28  | 217 | 25.47 | 2465 | 210.86 |                                              |
| 73  | LOC100912373   | 8.22  | 2   | 0.42  | 17   | 3.45   |                                              |
| 74  | Edn1           | 8.12  | 14  | 3.65  | 163  | 29.6   |                                              |
| 75  | Vmac           | 7.85  | 2   | 1.4   | 21   | 11.02  |                                              |
| 76  | Rab3b          | 7.76  | 18  | 5.04  | 212  | 39.11  |                                              |
| 77  | S1pr1          | 7.69  | 7   | 0.99  | 74   | 7.58   |                                              |
| 78  | Adamts12       | 7.51  | 30  | 0.84  | 266  | 6.33   |                                              |
| 79  | 7SK_354        | 7.48  | 1   | 1.28  | 10   | 9.6    |                                              |
| 80  | Cpne5          | 7.48  | 4   | 0.08  | 13   | 0.63   |                                              |
| 81  | Nalcn          | 7.48  | 5   | 0.07  | 19   | 0.51   |                                              |
| 82  | Spry1          | 7.48  | 3   | 0.44  | 32   | 3.26   |                                              |
| 83  | Rn60_20_0046.8 | 7.48  | 1   | 0.8   | 9    | 5.95   |                                              |
| 84  | RGD1565048     | 7.23  | 0   | 1.82  | 2    | 13.15  |                                              |
| 85  | LOC100363452   | 7.23  | 1   | 1.67  | 8    | 12.06  |                                              |
| 86  | Set            | 7.1   | 2   | 1.59  | 14   | 11.3   |                                              |
| 87  | Icam1          | 7.1   | 2   | 0.27  | 19   | 1.95   |                                              |
| 88  | Rasgrp3        | 7.1   | 10  | 0.16  | 19   | 1.13   |                                              |
| 89  | Vgll3          | 6.98  | 65  | 15.16 | 568  | 105.79 |                                              |
| 90  | Rps2-ps6       | 6.82  | 2   | 14.47 | 13   | 98.64  |                                              |
| 91  | AABR07002564.1 | 6.73  | 1   | 1.27  | 5    | 8.55   |                                              |
| 92  | Hey1           | 6.73  | 1   | 0.39  | 11   | 2.59   |                                              |
| 93  | Tnfsf18        | 6.73  | 1   | 0.17  | 11   | 1.17   |                                              |
| 94  | Zfp709l1       | 6.73  | 5   | 0.24  | 8    | 1.63   |                                              |
| 95  | AABR07055492.1 | 6.73  | 3   | 0.41  | 21   | 2.77   |                                              |
| 96  | Elovl2         | 6.73  | 1   | 0.1   | 10   | 0.64   |                                              |
| 97  | Gadd45b        | 6.73  | 2   | 0.56  | 19   | 3.75   |                                              |
| 98  | Myh11          | 6.73  | 14  | 0.38  | 73   | 2.55   |                                              |
| 99  | Olah           | 6.73  | 1   | 0.23  | 15   | 1.54   |                                              |
| 100 | Pth2r          | 6.73  | 5   | 0.18  | 15   | 1.23   |                                              |

Supplemental Table 3  
 FSH + Ad-E versus FSH + Ad-FOXO1(A3), 24 hours

|     | A              | B    | C   | D     | E    | F      | G |
|-----|----------------|------|-----|-------|------|--------|---|
| 101 | Sh3bgrl2       | 6.73 | 48  | 1     | 86   | 6.71   |   |
| 102 | Glis3          | 6.73 | 15  | 0.13  | 64   | 0.87   |   |
| 103 | Ctgf           | 6.7  | 463 | 61.95 | 4151 | 415.12 |   |
| 104 | Cald1          | 6.57 | 658 | 46.55 | 6023 | 305.61 |   |
| 105 | Cemip          | 6.53 | 194 | 9.14  | 1707 | 59.66  |   |
| 106 | Akap5          | 6.35 | 8   | 1.07  | 70   | 6.82   |   |
| 107 | Tgfb3          | 6.28 | 5   | 0.69  | 45   | 4.34   |   |
| 108 | Car3           | 6.23 | 7   | 1.37  | 51   | 8.53   |   |
| 109 | Fam169b        | 6.1  | 20  | 1.56  | 141  | 9.54   |   |
| 110 | Gabra4         | 6.09 | 9   | 0.57  | 80   | 3.49   |   |
| 111 | Agtr2          | 6.07 | 80  | 9.71  | 637  | 58.92  |   |
| 112 | Serping1       | 6.06 | 12  | 1.92  | 81   | 11.61  |   |
| 113 | Akr1c12        | 5.98 | 1   | 0.29  | 7    | 1.75   |   |
| 114 | Cebpzoz        | 5.98 | 1   | 1.49  | 4    | 8.91   |   |
| 115 | Chtop          | 5.98 | 0   | 0.45  | 0    | 2.7    |   |
| 116 | Fgd5           | 5.98 | 6   | 0.06  | 12   | 0.35   |   |
| 117 | Hmga1          | 5.98 | 3   | 2.23  | 16   | 13.37  |   |
| 118 | Ikzf2          | 5.98 | 32  | 0.17  | 56   | 0.99   |   |
| 119 | LOC100911319_2 | 5.98 | 0   | 0.25  | 5    | 1.49   |   |
| 120 | Spats2l        | 5.98 | 21  | 0.84  | 74   | 5.02   |   |
| 121 | Svip           | 5.98 | 2   | 0.31  | 8    | 1.84   |   |
| 122 | Tlr6           | 5.98 | 3   | 0.05  | 6    | 0.3    |   |
| 123 | Fam101b        | 5.98 | 3   | 0.53  | 16   | 3.18   |   |
| 124 | LOC100911837   | 5.98 | 0   | 0.08  | 0    | 0.46   |   |
| 125 | Zfp483         | 5.98 | 1   | 0.16  | 9    | 0.98   |   |
| 126 | Megf10         | 5.86 | 27  | 0.86  | 168  | 5.01   |   |
| 127 | Reln           | 5.61 | 143 | 3.23  | 946  | 18.13  |   |
| 128 | AABR07054593.1 | 5.61 | 3   | 0.39  | 18   | 2.19   |   |
| 129 | Maff           | 5.61 | 5   | 1.12  | 47   | 6.28   |   |
| 130 | Stmn4          | 5.61 | 6   | 0.51  | 29   | 2.87   |   |
| 131 | Rassf5         | 5.61 | 9   | 0.19  | 30   | 1.07   |   |
| 132 | Sptbn2         | 5.61 | 7   | 0.09  | 28   | 0.5    |   |
| 133 | Timm8a1_1      | 5.61 | 2   | 2.65  | 11   | 14.87  |   |
| 134 | Thbd           | 5.51 | 8   | 0.79  | 59   | 4.37   |   |
| 135 | LOC100363469   | 5.45 | 2   | 10.88 | 20   | 59.25  |   |
| 136 | Plcx3          | 5.42 | 15  | 0.77  | 68   | 4.17   |   |
| 137 | Adora2b        | 5.23 | 9   | 0.2   | 12   | 1.02   |   |
| 138 | Cdkn2b         | 5.23 | 2   | 0.06  | 9    | 0.34   |   |
| 139 | Nek3           | 5.23 | 13  | 0.43  | 37   | 2.23   |   |
| 140 | Pglyrp1        | 5.23 | 9   | 0.43  | 17   | 2.23   |   |
| 141 | Rn60_X_0711.1  | 5.23 | 1   | 0.57  | 7    | 2.97   |   |
| 142 | Rps20          | 5.23 | 1   | 1.01  | 0    | 5.31   |   |
| 143 | Spink8         | 5.23 | 3   | 0.41  | 20   | 2.17   |   |
| 144 | AABR07017145.1 | 5.23 | 9   | 0.18  | 17   | 0.93   |   |
| 145 | AABR07041140.1 | 5.23 | 1   | 0.28  | 5    | 1.48   |   |
| 146 | AABR07058656.1 | 5.23 | 4   | 0.38  | 8    | 1.97   |   |
| 147 | Ccsap          | 5.23 | 3   | 0.23  | 8    | 1.23   |   |
| 148 | Cntn3          | 5.23 | 10  | 0.09  | 15   | 0.46   |   |
| 149 | Hsd11b1        | 5.23 | 3   | 0.16  | 16   | 0.84   |   |
| 150 | Itga2b         | 5.23 | 7   | 0.11  | 12   | 0.57   |   |
| 151 | Kcng3          | 5.23 | 8   | 0.23  | 16   | 1.19   |   |
| 152 | Mpp7           | 5.23 | 4   | 0.16  | 19   | 0.86   |   |
| 153 | RGD1307461     | 5.23 | 2   | 0.12  | 8    | 0.63   |   |
| 154 | RGD1308601     | 5.23 | 1   | 0.07  | 5    | 0.38   |   |

Supplemental Table 3  
 FSH + Ad-E versus FSH + Ad-FOXO1(A3), 24 hours

|     | A                | B    | C   | D     | E    | F      | G |
|-----|------------------|------|-----|-------|------|--------|---|
| 155 | Rgs6             | 5.23 | 21  | 0.06  | 46   | 0.33   |   |
| 156 | Scin             | 5.23 | 3   | 0.17  | 9    | 0.88   |   |
| 157 | Sfrp2            | 5.23 | 1   | 0.15  | 7    | 0.81   |   |
| 158 | Slco2a1          | 5.23 | 1   | 0.09  | 8    | 0.47   |   |
| 159 | Tmem35           | 5.23 | 3   | 0.19  | 8    | 0.97   |   |
| 160 | Tnfaip8          | 5.23 | 6   | 0.46  | 27   | 2.39   |   |
| 161 | Wnt16            | 5.23 | 1   | 0.22  | 8    | 1.14   |   |
| 162 | LOC100910163     | 5.23 | 3   | 0.84  | 16   | 4.4    |   |
| 163 | Otub2            | 5.23 | 3   | 0.13  | 7    | 0.68   |   |
| 164 | Nupr1_2          | 5.22 | 0   | 24.82 | 2    | 129.5  |   |
| 165 | ENSRNOG000000050 | 4.98 | 38  | 0.82  | 112  | 4.07   |   |
| 166 | Dact1            | 4.98 | 3   | 0.44  | 24   | 2.21   |   |
| 167 | ENSRNOG000000053 | 4.98 | 5   | 0.32  | 26   | 1.6    |   |
| 168 | Sgms2            | 4.98 | 6   | 0.57  | 28   | 2.86   |   |
| 169 | Arhgap24         | 4.86 | 21  | 0.49  | 66   | 2.4    |   |
| 170 | Exosc3           | 4.86 | 2   | 0.84  | 13   | 4.08   |   |
| 171 | AC118147.1       | 4.86 | 0   | 1.32  | 0    | 6.43   |   |
| 172 | Spp1             | 4.85 | 132 | 31.46 | 869  | 152.54 |   |
| 173 | Gprin3           | 4.78 | 5   | 0.68  | 32   | 3.27   |   |
| 174 | Tpm2             | 4.73 | 6   | 0.73  | 26   | 3.45   |   |
| 175 | Eda              | 4.73 | 23  | 0.3   | 55   | 1.41   |   |
| 176 | Runx1t1          | 4.65 | 19  | 0.5   | 94   | 2.34   |   |
| 177 | Brms1_1          | 4.64 | 0   | 2.87  | 6    | 13.32  |   |
| 178 | Anxa3            | 4.61 | 9   | 0.56  | 44   | 2.56   |   |
| 179 | Arid5a           | 4.56 | 11  | 1.34  | 71   | 6.13   |   |
| 180 | Spag1            | 4.54 | 39  | 1.29  | 174  | 5.86   |   |
| 181 | Fam198b          | 4.51 | 35  | 2.51  | 206  | 11.33  |   |
| 182 | Pamr1            | 4.5  | 242 | 26.92 | 1543 | 121.05 |   |
| 183 | AABR07010144.1   | 4.49 | 0   | 0.08  | 2    | 0.37   |   |
| 184 | AABR07054265.1   | 4.49 | 3   | 3.77  | 11   | 16.92  |   |
| 185 | AABR07064980.1   | 4.49 | 0   | 1.14  | 0    | 5.11   |   |
| 186 | AC110709.1       | 4.49 | 0   | 1.81  | 1    | 8.14   |   |
| 187 | Bmp8a            | 4.49 | 3   | 0.19  | 7    | 0.85   |   |
| 188 | C6               | 4.49 | 6   | 0.12  | 8    | 0.54   |   |
| 189 | Erg              | 4.49 | 5   | 0.3   | 21   | 1.35   |   |
| 190 | Faim2            | 4.49 | 2   | 0.11  | 4    | 0.48   |   |
| 191 | Hip1r            | 4.49 | 18  | 1.08  | 85   | 4.86   |   |
| 192 | Map3k6           | 4.49 | 1   | 0.08  | 6    | 0.37   |   |
| 193 | Pak2_2           | 4.49 | 0   | 0.37  | 2    | 1.65   |   |
| 194 | Ppp2r2b          | 4.49 | 24  | 0.18  | 23   | 0.83   |   |
| 195 | Radil            | 4.49 | 8   | 0.1   | 8    | 0.44   |   |
| 196 | RGD1560687       | 4.49 | 0   | 0.66  | 2    | 2.94   |   |
| 197 | Sept4            | 4.49 | 16  | 1.2   | 83   | 5.39   |   |
| 198 | SNORD113_26      | 4.49 | 0   | 3.81  | 0    | 17.1   |   |
| 199 | Vasn             | 4.49 | 0   | 0.13  | 1    | 0.59   |   |
| 200 | AABR07044080.2   | 4.49 | 6   | 1.55  | 17   | 6.94   |   |
| 201 | Atf7ip2          | 4.49 | 4   | 0.31  | 12   | 1.37   |   |
| 202 | Cyp7b1           | 4.49 | 13  | 0.13  | 12   | 0.57   |   |
| 203 | Fcgr2b           | 4.49 | 10  | 0.1   | 14   | 0.44   |   |
| 204 | Fjx1             | 4.49 | 2   | 0.34  | 12   | 1.55   |   |
| 205 | Glb1l2           | 4.49 | 2   | 0.15  | 7    | 0.67   |   |
| 206 | Gnb3             | 4.49 | 4   | 0.21  | 8    | 0.93   |   |
| 207 | Larp6            | 4.49 | 3   | 0.15  | 7    | 0.7    |   |
| 208 | LOC102555453     | 4.49 | 0   | 0.73  | 0    | 3.26   |   |

Supplemental Table 3  
 FSH + Ad-E versus FSH + Ad-FOXO1(A3), 24 hours

|     | A              | B    | C    | D      | E    | F      | G |
|-----|----------------|------|------|--------|------|--------|---|
| 209 | Mreg           | 4.49 | 9    | 0.12   | 10   | 0.55   |   |
| 210 | Ogn_2          | 4.49 | 0    | 0.4    | 0    | 1.81   |   |
| 211 | Slc4a11        | 4.49 | 4    | 0.36   | 23   | 1.6    |   |
| 212 | SNORD24_2      | 4.49 | 0    | 4.83   | 0    | 21.66  |   |
| 213 | Timm9          | 4.49 | 2    | 0.81   | 11   | 3.62   |   |
| 214 | Trpc1          | 4.49 | 5    | 0.17   | 16   | 0.78   |   |
| 215 | Tnc            | 4.45 | 27   | 1.2    | 154  | 5.37   |   |
| 216 | Lrrfip1        | 4.38 | 43   | 3.49   | 271  | 15.3   |   |
| 217 | Ets1           | 4.36 | 44   | 2.66   | 229  | 11.62  |   |
| 218 | Pclo           | 4.34 | 46   | 0.95   | 256  | 4.14   |   |
| 219 | F3             | 4.3  | 16   | 3.18   | 102  | 13.67  |   |
| 220 | Sytl2_1        | 4.3  | 16   | 5.67   | 86   | 24.38  |   |
| 221 | Fam124a        | 4.28 | 20   | 0.98   | 108  | 4.21   |   |
| 222 | Rapgef5        | 4.27 | 17   | 0.47   | 48   | 2      |   |
| 223 | Fam65b         | 4.27 | 18   | 1.29   | 81   | 5.51   |   |
| 224 | Bdnf           | 4.27 | 40   | 1.85   | 233  | 7.9    |   |
| 225 | Pdlim3         | 4.24 | 60   | 6.12   | 315  | 25.98  |   |
| 226 | Cdh5           | 4.24 | 6    | 0.27   | 19   | 1.14   |   |
| 227 | Tnnc1          | 4.24 | 3    | 1.32   | 17   | 5.58   |   |
| 228 | Scn9a          | 4.21 | 15   | 0.43   | 65   | 1.8    |   |
| 229 | Shroom3        | 4.19 | 22   | 0.47   | 74   | 1.95   |   |
| 230 | Htr2a          | 4.15 | 62   | 2.27   | 261  | 9.44   |   |
| 231 | Tmem144        | 4.11 | 5    | 0.25   | 25   | 1.04   |   |
| 232 | B3gnt5         | 4.11 | 2    | 0.17   | 12   | 0.71   |   |
| 233 | Bspry          | 4.11 | 4    | 0.33   | 13   | 1.36   |   |
| 234 | Clec14a        | 4.11 | 2    | 0.23   | 11   | 0.95   |   |
| 235 | Dtx4           | 4.11 | 5    | 0.37   | 13   | 1.51   |   |
| 236 | ENSRNOG0000006 | 4.11 | 4    | 0.2    | 13   | 0.83   |   |
| 237 | Fam20a         | 4.11 | 7    | 0.27   | 25   | 1.12   |   |
| 238 | Fgf13          | 4.11 | 10   | 0.25   | 31   | 1.03   |   |
| 239 | Icoslg         | 4.11 | 8    | 0.26   | 23   | 1.07   |   |
| 240 | MGC105567      | 4.11 | 2    | 0.34   | 13   | 1.4    |   |
| 241 | Olr1433        | 4.11 | 2    | 0.74   | 12   | 3.03   |   |
| 242 | Pbld1          | 4.11 | 9    | 1.07   | 40   | 4.41   |   |
| 243 | RGD1560207     | 4.11 | 4    | 0.26   | 16   | 1.05   |   |
| 244 | Tmem160        | 4.11 | 2    | 0.88   | 12   | 3.64   |   |
| 245 | Tppp3          | 4.11 | 0    | 0.74   | 3    | 3.05   |   |
| 246 | Zfp365         | 4.11 | 6    | 0.43   | 38   | 1.77   |   |
| 247 | Pdgfrb         | 4.04 | 6    | 0.32   | 32   | 1.28   |   |
| 248 | Acta2          | 4    | 562  | 146.29 | 3038 | 584.58 |   |
| 249 | AC120310.1     | 3.99 | 0    | 0.54   | 0    | 2.14   |   |
| 250 | Prune2         | 3.99 | 11   | 1.12   | 39   | 4.48   |   |
| 251 | Spryd7         | 3.99 | 6    | 0.79   | 22   | 3.16   |   |
| 252 | Tlr4           | 3.93 | 5    | 0.43   | 24   | 1.7    |   |
| 253 | Phactr2        | 3.89 | 19   | 0.91   | 48   | 3.56   |   |
| 254 | Ankrd1         | 3.86 | 6    | 1.23   | 36   | 4.74   |   |
| 255 | Lrp4           | 3.83 | 32   | 1.11   | 168  | 4.25   |   |
| 256 | Stard13        | 3.82 | 65   | 0.58   | 157  | 2.22   |   |
| 257 | Fn1            | 3.75 | 1926 | 82.23  | 9650 | 308.37 |   |
| 258 | AABR07038349.1 | 3.74 | 2    | 0.33   | 5    | 1.25   |   |
| 259 | Ankh           | 3.74 | 32   | 2.95   | 143  | 11.02  |   |
| 260 | Col20a1        | 3.74 | 15   | 0.08   | 19   | 0.31   |   |
| 261 | Rnf180         | 3.74 | 14   | 0.61   | 25   | 2.28   |   |
| 262 | SNORD36_2      | 3.74 | 0    | 8.83   | 0    | 33.01  |   |

Supplemental Table 3  
 FSH + Ad-E versus FSH + Ad-FOXO1(A3), 24 hours

|     | A              | B    | C   | D     | E   | F     | G |
|-----|----------------|------|-----|-------|-----|-------|---|
| 263 | AABR07037356.1 | 3.74 | 2   | 0.31  | 4   | 1.16  |   |
| 264 | AABR07060862.1 | 3.74 | 1   | 0.11  | 5   | 0.41  |   |
| 265 | AABR07062268.1 | 3.74 | 0   | 0.75  | 0   | 2.82  |   |
| 266 | AC110387.1     | 3.74 | 2   | 4.71  | 4   | 17.62 |   |
| 267 | Brinp2         | 3.74 | 2   | 0.09  | 8   | 0.33  |   |
| 268 | Enox1          | 3.74 | 24  | 0.62  | 63  | 2.33  |   |
| 269 | Fancf          | 3.74 | 1   | 0.36  | 5   | 1.33  |   |
| 270 | Gls2           | 3.74 | 4   | 0.13  | 5   | 0.49  |   |
| 271 | Gpr75          | 3.74 | 1   | 0.14  | 5   | 0.52  |   |
| 272 | Igf2bp3        | 3.74 | 5   | 0.17  | 13  | 0.63  |   |
| 273 | Ikbke          | 3.74 | 8   | 0.22  | 18  | 0.84  |   |
| 274 | Il17d          | 3.74 | 3   | 0.58  | 20  | 2.16  |   |
| 275 | Klhdc9         | 3.74 | 2   | 0.4   | 11  | 1.49  |   |
| 276 | Lmntd2         | 3.74 | 1   | 0.12  | 4   | 0.47  |   |
| 277 | LOC100125368   | 3.74 | 0   | 0.24  | 0   | 0.9   |   |
| 278 | LOC288978      | 3.74 | 9   | 0.33  | 19  | 1.23  |   |
| 279 | Map3k8         | 3.74 | 2   | 0.13  | 9   | 0.47  |   |
| 280 | Map7d3         | 3.74 | 7   | 0.11  | 7   | 0.4   |   |
| 281 | Nuak2          | 3.74 | 1   | 0.13  | 6   | 0.47  |   |
| 282 | Paqr5          | 3.74 | 4   | 0.1   | 13  | 0.37  |   |
| 283 | Rgcc           | 3.74 | 3   | 0.41  | 7   | 1.52  |   |
| 284 | SCARNA2_1      | 3.74 | 1   | 0.87  | 5   | 3.25  |   |
| 285 | Slc6a20        | 3.74 | 5   | 0.12  | 12  | 0.45  |   |
| 286 | Syt14          | 3.74 | 13  | 0.17  | 21  | 0.65  |   |
| 287 | Thbs4          | 3.74 | 3   | 0.22  | 10  | 0.84  |   |
| 288 | Zc3hav1l       | 3.74 | 3   | 0.8   | 16  | 3     |   |
| 289 | Arhgef37       | 3.74 | 8   | 0.09  | 22  | 0.35  |   |
| 290 | Cidea          | 3.74 | 3   | 0.66  | 6   | 2.48  |   |
| 291 | Gsta5          | 3.74 | 0   | 0.35  | 0   | 1.31  |   |
| 292 | Itgbl1         | 3.74 | 16  | 0.47  | 46  | 1.77  |   |
| 293 | Nav3           | 3.74 | 18  | 0.43  | 77  | 1.6   |   |
| 294 | Rccd1          | 3.74 | 6   | 0.32  | 16  | 1.19  |   |
| 295 | Rgs10          | 3.74 | 1   | 0.43  | 8   | 1.61  |   |
| 296 | snoMBII-202_2  | 3.74 | 0   | 4.36  | 0   | 16.31 |   |
| 297 | Zfp455         | 3.74 | 1   | 0.12  | 3   | 0.45  |   |
| 298 | Tec            | 3.74 | 12  | 0.68  | 56  | 2.54  |   |
| 299 | Pdk4           | 3.68 | 12  | 2.76  | 59  | 10.15 |   |
| 300 | Penk           | 3.64 | 16  | 3.4   | 80  | 12.41 |   |
| 301 | Aspn_2         | 3.64 | 6   | 2.64  | 24  | 9.59  |   |
| 302 | Alpk3          | 3.63 | 11  | 0.4   | 44  | 1.46  |   |
| 303 | AABR07073045.1 | 3.61 | 0   | 4.66  | 0   | 16.85 |   |
| 304 | Klf12          | 3.61 | 67  | 1.4   | 206 | 5.08  |   |
| 305 | Popdc2         | 3.59 | 23  | 1.63  | 90  | 5.84  |   |
| 306 | Sh3yl1         | 3.59 | 24  | 1.31  | 64  | 4.68  |   |
| 307 | Lcp1           | 3.55 | 7   | 0.4   | 21  | 1.41  |   |
| 308 | Stxbp6         | 3.55 | 43  | 2.18  | 170 | 7.74  |   |
| 309 | Ehd4           | 3.53 | 171 | 16.05 | 865 | 56.7  |   |
| 310 | Ccdc80         | 3.51 | 12  | 0.88  | 49  | 3.11  |   |
| 311 | AABR07008377.1 | 3.5  | 4   | 14.89 | 15  | 52.15 |   |
| 312 | Hpse           | 3.49 | 5   | 0.68  | 18  | 2.36  |   |
| 313 | LOC100361913   | 3.49 | 0   | 1.4   | 0   | 4.87  |   |
| 314 | Lsp1           | 3.49 | 6   | 0.88  | 23  | 3.07  |   |
| 315 | Mgp            | 3.49 | 3   | 1.61  | 16  | 5.61  |   |
| 316 | Cav1           | 3.39 | 114 | 15.99 | 519 | 54.29 |   |

Supplemental Table 3  
 FSH + Ad-E versus FSH + Ad-FOXO1(A3), 24 hours

|     | A              | B    | C   | D     | E    | F      | G |
|-----|----------------|------|-----|-------|------|--------|---|
| 317 | Cd55           | 3.39 | 30  | 1.99  | 126  | 6.74   |   |
| 318 | Dcun1d3        | 3.36 | 28  | 1.97  | 72   | 6.62   |   |
| 319 | Dusp4          | 3.36 | 5   | 0.36  | 18   | 1.23   |   |
| 320 | Scml2          | 3.36 | 13  | 0.17  | 14   | 0.56   |   |
| 321 | Syt9           | 3.36 | 5   | 0.48  | 14   | 1.62   |   |
| 322 | AABR07063829.1 | 3.36 | 5   | 1.69  | 12   | 5.68   |   |
| 323 | Ccdc175        | 3.36 | 8   | 0.27  | 14   | 0.9    |   |
| 324 | Gbp5           | 3.36 | 3   | 0.23  | 9    | 0.78   |   |
| 325 | LOC100364191   | 3.36 | 0   | 1.84  | 2    | 6.2    |   |
| 326 | Orai2          | 3.36 | 3   | 0.17  | 15   | 0.58   |   |
| 327 | Rec114         | 3.36 | 7   | 0.76  | 10   | 2.57   |   |
| 328 | Slfn2          | 3.36 | 13  | 1.63  | 40   | 5.5    |   |
| 329 | Tbkbp1         | 3.36 | 4   | 0.22  | 13   | 0.74   |   |
| 330 | Sult1a1        | 3.36 | 10  | 0.59  | 13   | 1.99   |   |
| 331 | Thsd7a         | 3.35 | 47  | 1.69  | 180  | 5.65   |   |
| 332 | Klf6           | 3.34 | 274 | 8.13  | 827  | 27.15  |   |
| 333 | Tspan2         | 3.34 | 30  | 2.46  | 152  | 8.2    |   |
| 334 | Npnt           | 3.32 | 92  | 12.38 | 443  | 41.15  |   |
| 335 | Bend7          | 3.32 | 33  | 2.52  | 125  | 8.37   |   |
| 336 | Tdrd7          | 3.3  | 374 | 25.91 | 1761 | 85.37  |   |
| 337 | Osr2           | 3.29 | 7   | 0.89  | 25   | 2.94   |   |
| 338 | Zfp385d        | 3.29 | 51  | 1.04  | 168  | 3.44   |   |
| 339 | Pyroxd1        | 3.26 | 21  | 2.24  | 77   | 7.32   |   |
| 340 | Fsd1l          | 3.24 | 19  | 0.58  | 56   | 1.89   |   |
| 341 | Pigf           | 3.24 | 28  | 1.69  | 43   | 5.49   |   |
| 342 | Proca1         | 3.24 | 18  | 0.77  | 27   | 2.49   |   |
| 343 | Rhoj           | 3.24 | 13  | 0.41  | 21   | 1.31   |   |
| 344 | Gja4           | 3.24 | 6   | 1.37  | 26   | 4.43   |   |
| 345 | SNORD123       | 3.24 | 3   | 15.52 | 13   | 50.27  |   |
| 346 | Efnb2          | 3.22 | 36  | 2.22  | 143  | 7.14   |   |
| 347 | Ghr            | 3.19 | 92  | 3.81  | 303  | 12.16  |   |
| 348 | Atp13a3        | 3.18 | 12  | 1.83  | 29   | 5.83   |   |
| 349 | Gldc           | 3.18 | 7   | 0.38  | 29   | 1.22   |   |
| 350 | Bach2          | 3.14 | 36  | 0.96  | 165  | 3.03   |   |
| 351 | Pin4           | 3.12 | 11  | 4.67  | 25   | 14.55  |   |
| 352 | Plekhg1        | 3.08 | 13  | 0.47  | 48   | 1.46   |   |
| 353 | Dcn            | 3.08 | 67  | 12.64 | 287  | 38.96  |   |
| 354 | Zfp36          | 3.07 | 9   | 1.77  | 38   | 5.43   |   |
| 355 | Cyr61          | 3.07 | 441 | 79.93 | 1812 | 245.18 |   |
| 356 | Il1r1          | 3.05 | 21  | 1.19  | 67   | 3.63   |   |
| 357 | AABR07036855.1 | 3.04 | 8   | 4.54  | 28   | 13.83  |   |
| 358 | Tgfb2          | 3.03 | 342 | 24.99 | 1449 | 75.68  |   |
| 359 | LOC100910881   | 3.02 | 0   | 1.36  | 2    | 4.12   |   |
| 360 | Cpe            | 3.01 | 120 | 18.58 | 514  | 55.96  |   |
| 361 | LOC100911572_1 | 3    | 155 | 11.23 | 629  | 33.67  |   |
| 362 | 2900026A02Rik  | 2.99 | 9   | 0.07  | 14   | 0.22   |   |
| 363 | AABR07027752.3 | 2.99 | 1   | 0.6   | 4    | 1.81   |   |
| 364 | AABR07049961.1 | 2.99 | 0   | 0.21  | 1    | 0.63   |   |
| 365 | AABR07050399.2 | 2.99 | 0   | 0.19  | 2    | 0.56   |   |
| 366 | AABR07055146.1 | 2.99 | 1   | 0.34  | 5    | 1.01   |   |
| 367 | AABR07062344.1 | 2.99 | 0   | 2.87  | 0    | 8.59   |   |
| 368 | AC095390.1     | 2.99 | 46  | 0.99  | 99   | 2.96   |   |
| 369 | AC136661.1     | 2.99 | 0   | 1.09  | 0    | 3.25   |   |
| 370 | Afmid          | 2.99 | 11  | 0.14  | 10   | 0.43   |   |

Supplemental Table 3  
 FSH + Ad-E versus FSH + Ad-FOXO1(A3), 24 hours

|     | A              | B    | C  | D    | E   | F     | G |
|-----|----------------|------|----|------|-----|-------|---|
| 371 | Ankmy1         | 2.99 | 8  | 0.24 | 18  | 0.72  |   |
| 372 | Arl4d          | 2.99 | 2  | 0.52 | 8   | 1.57  |   |
| 373 | Asb4           | 2.99 | 9  | 0.31 | 18  | 0.93  |   |
| 374 | C8g            | 2.99 | 16 | 0.88 | 22  | 2.63  |   |
| 375 | Car9           | 2.99 | 2  | 0.18 | 9   | 0.52  |   |
| 376 | Cask_1         | 2.99 | 0  | 0.34 | 0   | 1.01  |   |
| 377 | Cdh13          | 2.99 | 79 | 1.34 | 141 | 4.02  |   |
| 378 | Cebpd          | 2.99 | 3  | 0.95 | 12  | 2.85  |   |
| 379 | Cib2           | 2.99 | 5  | 0.26 | 4   | 0.77  |   |
| 380 | Cntn4          | 2.99 | 10 | 0.07 | 12  | 0.22  |   |
| 381 | Col11a2        | 2.99 | 1  | 0.06 | 5   | 0.17  |   |
| 382 | Cxcr4          | 2.99 | 1  | 0.21 | 4   | 0.62  |   |
| 383 | Dbf4_2         | 2.99 | 0  | 0.36 | 4   | 1.09  |   |
| 384 | Eef1a2         | 2.99 | 1  | 0.18 | 5   | 0.54  |   |
| 385 | Epha3          | 2.99 | 11 | 0.06 | 14  | 0.18  |   |
| 386 | Fam131a_1      | 2.99 | 0  | 0.1  | 0   | 0.3   |   |
| 387 | Gabra5         | 2.99 | 5  | 0.14 | 8   | 0.41  |   |
| 388 | Gng11          | 2.99 | 0  | 0.42 | 0   | 1.25  |   |
| 389 | Heatr4         | 2.99 | 2  | 0.09 | 11  | 0.27  |   |
| 390 | Krt80          | 2.99 | 2  | 0.12 | 5   | 0.35  |   |
| 391 | LOC100362814   | 2.99 | 18 | 0.18 | 49  | 0.54  |   |
| 392 | LOC100911713   | 2.99 | 0  | 0.95 | 0   | 2.84  |   |
| 393 | LOC100911926   | 2.99 | 2  | 0.29 | 9   | 0.86  |   |
| 394 | LOC679565      | 2.99 | 0  | 0.24 | 0   | 0.72  |   |
| 395 | LOC681193      | 2.99 | 0  | 0.37 | 0   | 1.12  |   |
| 396 | Lrrc3b         | 2.99 | 1  | 0.46 | 4   | 1.39  |   |
| 397 | Ly6h           | 2.99 | 1  | 0.33 | 4   | 1     |   |
| 398 | Mcc            | 2.99 | 40 | 3.13 | 135 | 9.35  |   |
| 399 | Mmp28          | 2.99 | 5  | 0.46 | 18  | 1.37  |   |
| 400 | Mn1            | 2.99 | 5  | 0.09 | 5   | 0.28  |   |
| 401 | Myl6b          | 2.99 | 30 | 1.74 | 56  | 5.21  |   |
| 402 | Pde4a          | 2.99 | 2  | 0.14 | 10  | 0.43  |   |
| 403 | Prdm1          | 2.99 | 3  | 0.07 | 7   | 0.2   |   |
| 404 | Prrt2          | 2.99 | 2  | 0.15 | 5   | 0.45  |   |
| 405 | RGD1559441     | 2.99 | 6  | 0.08 | 10  | 0.22  |   |
| 406 | RGD1563962     | 2.99 | 0  | 0.2  | 0   | 0.59  |   |
| 407 | Rgs22          | 2.99 | 7  | 0.14 | 20  | 0.42  |   |
| 408 | Rnf128         | 2.99 | 4  | 0.23 | 10  | 0.68  |   |
| 409 | Satb2          | 2.99 | 6  | 0.06 | 13  | 0.17  |   |
| 410 | Serpinb2       | 2.99 | 2  | 0.37 | 9   | 1.1   |   |
| 411 | Serpinb8       | 2.99 | 4  | 0.26 | 14  | 0.78  |   |
| 412 | Serpine1       | 2.99 | 5  | 0.59 | 22  | 1.77  |   |
| 413 | Slc1a1         | 2.99 | 5  | 0.1  | 11  | 0.29  |   |
| 414 | Slc25a29       | 2.99 | 9  | 0.36 | 20  | 1.08  |   |
| 415 | SNORD36_5      | 2.99 | 0  | 8.83 | 0   | 26.41 |   |
| 416 | Spata24        | 2.99 | 12 | 0.45 | 8   | 1.35  |   |
| 417 | Spef2          | 2.99 | 4  | 0.06 | 5   | 0.19  |   |
| 418 | Tmem86b        | 2.99 | 1  | 0.23 | 4   | 0.69  |   |
| 419 | Trpc5          | 2.99 | 17 | 0.28 | 34  | 0.84  |   |
| 420 | Trpm1          | 2.99 | 5  | 0.07 | 11  | 0.22  |   |
| 421 | Zfp423         | 2.99 | 11 | 0.08 | 12  | 0.23  |   |
| 422 | Zfp951_1       | 2.99 | 0  | 0.29 | 0   | 0.88  |   |
| 423 | AABR07001233.1 | 2.99 | 61 | 0.29 | 86  | 0.86  |   |
| 424 | AABR07002247.1 | 2.99 | 7  | 0.24 | 20  | 0.71  |   |



Supplemental Table 3  
 FSH + Ad-E versus FSH + Ad-FOXO1(A3), 24 hours

|     | A              | B    | C    | D      | E    | F      | G |
|-----|----------------|------|------|--------|------|--------|---|
| 425 | AABR07047140.1 | 2.99 | 0    | 1.06   | 0    | 3.17   |   |
| 426 | Abhd15         | 2.99 | 2    | 0.12   | 4    | 0.35   |   |
| 427 | Actc1          | 2.99 | 1    | 0.24   | 4    | 0.73   |   |
| 428 | Ahrr           | 2.99 | 20   | 0.62   | 48   | 1.85   |   |
| 429 | Crnk1l_2       | 2.99 | 0    | 0.46   | 2    | 1.37   |   |
| 430 | Dcun1d2        | 2.99 | 0    | 0.27   | 0    | 0.8    |   |
| 431 | Epb4.1l1       | 2.99 | 0    | 0.11   | 1    | 0.33   |   |
| 432 | Fbxo15         | 2.99 | 8    | 0.24   | 14   | 0.71   |   |
| 433 | Izumo4         | 2.99 | 3    | 0.53   | 7    | 1.58   |   |
| 434 | Klk13          | 2.99 | 1    | 0.35   | 6    | 1.04   |   |
| 435 | LOC100360120   | 2.99 | 124  | 1.34   | 172  | 4.01   |   |
| 436 | LOC100910255_1 | 2.99 | 0    | 0.07   | 0    | 0.2    |   |
| 437 | LOC100910885_2 | 2.99 | 2    | 0.3    | 2    | 0.9    |   |
| 438 | Nek10          | 2.99 | 26   | 0.21   | 53   | 0.64   |   |
| 439 | Npr1           | 2.99 | 1    | 0.09   | 4    | 0.27   |   |
| 440 | Polm           | 2.99 | 12   | 0.45   | 22   | 1.34   |   |
| 441 | RGD1560784     | 2.99 | 1    | 0.36   | 4    | 1.08   |   |
| 442 | Rgs7bp         | 2.99 | 9    | 0.7    | 25   | 2.1    |   |
| 443 | Snai1          | 2.99 | 2    | 0.2    | 6    | 0.59   |   |
| 444 | SNORA44_6      | 2.99 | 0    | 2.81   | 0    | 8.39   |   |
| 445 | SNORA44_8      | 2.99 | 0    | 5.61   | 0    | 16.79  |   |
| 446 | Syndig1        | 2.99 | 7    | 0.17   | 11   | 0.5    |   |
| 447 | Trpm6          | 2.99 | 3    | 0.06   | 6    | 0.18   |   |
| 448 | Zfp111         | 2.99 | 0    | 0.16   | 3    | 0.48   |   |
| 449 | Zfp580         | 2.99 | 1    | 0.7    | 4    | 2.09   |   |
| 450 | Grk4           | 2.99 | 54   | 1.03   | 109  | 3.07   |   |
| 451 | Lgals8         | 2.98 | 34   | 12.45  | 125  | 37.12  |   |
| 452 | Fbxo32         | 2.96 | 66   | 5.58   | 267  | 16.52  |   |
| 453 | Pex5           | 2.95 | 0    | 4.75   | 0    | 14.03  |   |
| 454 | Cnksr3         | 2.95 | 74   | 4.18   | 277  | 12.31  |   |
| 455 | Filip1l        | 2.94 | 539  | 29.73  | 2474 | 87.4   |   |
| 456 | Adamts13       | 2.94 | 24   | 0.68   | 73   | 2.01   |   |
| 457 | Actn1          | 2.93 | 635  | 49.33  | 2455 | 144.48 |   |
| 458 | Gmfb           | 2.93 | 18   | 9.47   | 52   | 27.72  |   |
| 459 | Mitf           | 2.91 | 127  | 3.99   | 441  | 11.61  |   |
| 460 | Mnat1          | 2.89 | 76   | 10.02  | 211  | 28.92  |   |
| 461 | Fnip2          | 2.88 | 22   | 1.07   | 77   | 3.08   |   |
| 462 | Ppap2a         | 2.88 | 21   | 1.72   | 54   | 4.96   |   |
| 463 | Anpep          | 2.88 | 386  | 35.45  | 1506 | 102.2  |   |
| 464 | Pdlim5         | 2.88 | 55   | 7.56   | 199  | 21.75  |   |
| 465 | SNORD39        | 2.88 | 0    | 238.32 | 0    | 685.29 |   |
| 466 | Lmcd1          | 2.88 | 33   | 5.67   | 148  | 16.31  |   |
| 467 | Celf2          | 2.87 | 78   | 5.56   | 282  | 15.96  |   |
| 468 | AABR07005618.1 | 2.87 | 7    | 4.99   | 23   | 14.31  |   |
| 469 | Xrcc4          | 2.87 | 43   | 1.51   | 65   | 4.33   |   |
| 470 | Stx3           | 2.86 | 84   | 7.17   | 314  | 20.51  |   |
| 471 | Nov            | 2.84 | 1576 | 232.11 | 6126 | 659.44 |   |
| 472 | Scrn1          | 2.84 | 14   | 0.36   | 35   | 1.02   |   |
| 473 | BC030336       | 2.84 | 14   | 4.54   | 40   | 12.89  |   |
| 474 | RGD1564405     | 2.84 | 3    | 0.9    | 16   | 2.55   |   |
| 475 | Vrk2           | 2.84 | 29   | 1.6    | 55   | 4.54   |   |
| 476 | Pcgf5          | 2.83 | 29   | 2.89   | 131  | 8.19   |   |
| 477 | Lnp            | 2.82 | 29   | 2.14   | 89   | 6.05   |   |
| 478 | RGD1561444     | 2.82 | 37   | 1.51   | 140  | 4.25   |   |

Supplemental Table 3  
 FSH + Ad-E versus FSH + Ad-FOXO1(A3), 24 hours

|     | A              | B    | C    | D     | E    | F      | G |
|-----|----------------|------|------|-------|------|--------|---|
| 479 | Tyw3           | 2.82 | 30   | 2.41  | 56   | 6.8    |   |
| 480 | Mid1           | 2.81 | 42   | 1.46  | 163  | 4.12   |   |
| 481 | Gemin6         | 2.8  | 6    | 1.33  | 15   | 3.73   |   |
| 482 | Creb5          | 2.8  | 40   | 0.64  | 111  | 1.8    |   |
| 483 | Lims2          | 2.8  | 17   | 1.79  | 66   | 5.01   |   |
| 484 | Cited2         | 2.8  | 229  | 42.54 | 861  | 119.03 |   |
| 485 | Dock10         | 2.8  | 71   | 1.42  | 190  | 3.97   |   |
| 486 | Itih5          | 2.79 | 25   | 5.66  | 95   | 15.78  |   |
| 487 | Pcbp3          | 2.78 | 32   | 1.24  | 64   | 3.43   |   |
| 488 | AABR07027272.1 | 2.78 | 5    | 1.31  | 18   | 3.65   |   |
| 489 | Aass           | 2.78 | 10   | 0.91  | 29   | 2.53   |   |
| 490 | Slitrk6        | 2.78 | 7    | 0.6   | 26   | 1.66   |   |
| 491 | Trpc3          | 2.77 | 39   | 1.58  | 150  | 4.39   |   |
| 492 | AABR07039234.1 | 2.74 | 2    | 0.62  | 9    | 1.71   |   |
| 493 | Car5b          | 2.74 | 7    | 0.38  | 13   | 1.05   |   |
| 494 | Rtkn2          | 2.74 | 13   | 0.31  | 21   | 0.84   |   |
| 495 | AC106663.5     | 2.74 | 0    | 1.71  | 1    | 4.68   |   |
| 496 | Rp2            | 2.74 | 32   | 0.69  | 70   | 1.89   |   |
| 497 | Sapcd2         | 2.74 | 6    | 0.7   | 16   | 1.92   |   |
| 498 | Zfp87          | 2.74 | 2    | 0.67  | 7    | 1.84   |   |
| 499 | Peak1          | 2.74 | 210  | 6.56  | 727  | 17.95  |   |
| 500 | G6pc_1         | 2.74 | 4    | 7.75  | 14   | 21.2   |   |
| 501 | Dock5          | 2.73 | 237  | 10.01 | 840  | 27.31  |   |
| 502 | Arid5b         | 2.72 | 172  | 8.82  | 603  | 24.03  |   |
| 503 | Kif20b         | 2.72 | 21   | 0.93  | 54   | 2.52   |   |
| 504 | Amotl2         | 2.72 | 408  | 28.96 | 1437 | 78.74  |   |
| 505 | Mterf          | 2.72 | 21   | 2.65  | 62   | 7.21   |   |
| 506 | AC117889.1     | 2.71 | 5    | 1.06  | 11   | 2.86   |   |
| 507 | Zfp641         | 2.71 | 10   | 1.39  | 31   | 3.78   |   |
| 508 | Pfdn6          | 2.7  | 14   | 12.26 | 49   | 33.13  |   |
| 509 | Ndrp1          | 2.7  | 29   | 3.49  | 112  | 9.4    |   |
| 510 | Ank3           | 2.69 | 17   | 0.17  | 42   | 0.47   |   |
| 511 | Nr6a1          | 2.69 | 20   | 1.37  | 65   | 3.7    |   |
| 512 | Mr1            | 2.69 | 16   | 0.6   | 27   | 1.62   |   |
| 513 | Rhebl1         | 2.69 | 7    | 1.53  | 21   | 4.12   |   |
| 514 | Lox            | 2.68 | 1813 | 122.4 | 6266 | 328.52 |   |
| 515 | Bmf            | 2.68 | 23   | 3.3   | 86   | 8.83   |   |
| 516 | Cldn1          | 2.67 | 9    | 0.77  | 29   | 2.05   |   |
| 517 | SNORD100       | 2.67 | 0    | 33.79 | 0    | 90.23  |   |
| 518 | Jmjd7          | 2.67 | 13   | 1.9   | 29   | 5.07   |   |
| 519 | Akap12         | 2.66 | 33   | 1.37  | 104  | 3.66   |   |
| 520 | Otud1          | 2.66 | 9    | 2.38  | 32   | 6.33   |   |
| 521 | Tpm1           | 2.66 | 399  | 35.9  | 1453 | 95.38  |   |
| 522 | RT1-CE2        | 2.66 | 24   | 4.47  | 93   | 11.87  |   |
| 523 | Adamts5        | 2.63 | 549  | 55.11 | 2105 | 145.05 |   |
| 524 | Bean1          | 2.63 | 54   | 12.09 | 176  | 31.78  |   |
| 525 | Sept6          | 2.63 | 89   | 7.2   | 305  | 18.89  |   |
| 526 | Smagp          | 2.62 | 5    | 0.48  | 11   | 1.27   |   |
| 527 | AABR07028795.1 | 2.62 | 4    | 3.22  | 7    | 8.42   |   |
| 528 | Kcnb2          | 2.62 | 2    | 0.33  | 7    | 0.88   |   |
| 529 | LOC100362583   | 2.62 | 0    | 1.19  | 2    | 3.11   |   |
| 530 | LOC100911256   | 2.62 | 0    | 0.11  | 0    | 0.29   |   |
| 531 | LOC680200      | 2.62 | 12   | 0.92  | 27   | 2.4    |   |
| 532 | Maml2          | 2.62 | 61   | 1.23  | 189  | 3.22   |   |

Supplemental Table 3  
 FSH + Ad-E versus FSH + Ad-FOXO1(A3), 24 hours

|     | A              | B    | C   | D     | E    | F      | G |
|-----|----------------|------|-----|-------|------|--------|---|
| 533 | Nfil3          | 2.62 | 16  | 2.59  | 56   | 6.77   |   |
| 534 | Nin            | 2.62 | 3   | 1.29  | 14   | 3.38   |   |
| 535 | Rn60_9_0975.2  | 2.62 | 2   | 0.88  | 7    | 2.31   |   |
| 536 | SNORA44_21     | 2.62 | 0   | 5.61  | 0    | 14.69  |   |
| 537 | Zscan29        | 2.62 | 12  | 0.29  | 26   | 0.75   |   |
| 538 | Ppp1r14c       | 2.62 | 4   | 0.26  | 11   | 0.68   |   |
| 539 | Zfp37          | 2.62 | 1   | 0.41  | 3    | 1.06   |   |
| 540 | Zbtb44         | 2.61 | 83  | 7.35  | 259  | 19.19  |   |
| 541 | Zyx            | 2.61 | 449 | 60.44 | 1600 | 157.46 |   |
| 542 | Egr1           | 2.61 | 95  | 11.22 | 337  | 29.23  |   |
| 543 | Stradb         | 2.6  | 64  | 6.78  | 229  | 17.62  |   |
| 544 | Ccdc15         | 2.6  | 47  | 3.03  | 124  | 7.87   |   |
| 545 | Sema3a         | 2.6  | 84  | 6.52  | 285  | 16.94  |   |
| 546 | Fosl2          | 2.6  | 119 | 19.47 | 418  | 50.57  |   |
| 547 | Aspn_1         | 2.59 | 5   | 4.04  | 15   | 10.47  |   |
| 548 | Rpl13          | 2.59 | 9   | 22.2  | 30   | 57.46  |   |
| 549 | Tjp2           | 2.58 | 55  | 2.71  | 175  | 7.01   |   |
| 550 | Tmem140        | 2.58 | 22  | 2.91  | 56   | 7.5    |   |
| 551 | Cdyl2          | 2.58 | 25  | 1.59  | 52   | 4.1    |   |
| 552 | Fign           | 2.58 | 41  | 0.96  | 96   | 2.48   |   |
| 553 | Pcdh17         | 2.58 | 11  | 0.7   | 39   | 1.8    |   |
| 554 | Diap2          | 2.58 | 26  | 1.54  | 53   | 3.96   |   |
| 555 | LOC100911597   | 2.57 | 90  | 63.79 | 224  | 164.11 |   |
| 556 | Synj2          | 2.57 | 73  | 3.54  | 242  | 9.11   |   |
| 557 | Tfcp2l1        | 2.57 | 38  | 1.57  | 116  | 4.04   |   |
| 558 | Plscr4         | 2.57 | 148 | 10.36 | 511  | 26.6   |   |
| 559 | Mfap3l         | 2.57 | 70  | 9.97  | 242  | 25.59  |   |
| 560 | Xdh            | 2.57 | 108 | 7.38  | 369  | 18.95  |   |
| 561 | Itgb8          | 2.56 | 15  | 0.73  | 39   | 1.86   |   |
| 562 | Sorbs1         | 2.56 | 146 | 5.55  | 539  | 14.22  |   |
| 563 | Rnd3           | 2.56 | 309 | 34.67 | 1099 | 88.79  |   |
| 564 | Setdb2         | 2.55 | 40  | 3.71  | 137  | 9.46   |   |
| 565 | Pcgf1          | 2.54 | 0   | 1.44  | 1    | 3.67   |   |
| 566 | Wipf1          | 2.53 | 20  | 1.73  | 67   | 4.39   |   |
| 567 | RGD1565641     | 2.53 | 17  | 11.42 | 49   | 28.91  |   |
| 568 | Slc35f1        | 2.53 | 18  | 1.15  | 52   | 2.92   |   |
| 569 | AABR07053749.1 | 2.53 | 34  | 15.09 | 101  | 38.1   |   |
| 570 | Jade1          | 2.52 | 91  | 4.04  | 292  | 10.21  |   |
| 571 | Hyi            | 2.52 | 11  | 2.79  | 23   | 7.03   |   |
| 572 | Pdha11l        | 2.52 | 3   | 1.42  | 12   | 3.58   |   |
| 573 | Dpysl3         | 2.52 | 159 | 19.22 | 565  | 48.41  |   |
| 574 | Map3k9         | 2.51 | 13  | 1.07  | 42   | 2.7    |   |
| 575 | Angpt1         | 2.51 | 61  | 5.36  | 204  | 13.46  |   |
| 576 | Hspb1          | 2.51 | 17  | 7     | 57   | 17.55  |   |
| 577 | Rnd1           | 2.5  | 49  | 9.68  | 156  | 24.23  |   |
| 578 | Crim1          | 2.5  | 857 | 59.16 | 3141 | 148.03 |   |
| 579 | Csrp1          | 2.5  | 85  | 17.01 | 307  | 42.5   |   |
| 580 | AABR07010620.1 | 2.49 | 9   | 1.05  | 30   | 2.62   |   |
| 581 | Camkmt         | 2.49 | 10  | 1.07  | 20   | 2.66   |   |
| 582 | Hmmr           | 2.49 | 14  | 0.95  | 24   | 2.37   |   |
| 583 | LOC100912042   | 2.49 | 0   | 0.94  | 0    | 2.34   |   |
| 584 | LOC102553962   | 2.49 | 5   | 0.84  | 11   | 2.09   |   |
| 585 | Mybpc3         | 2.49 | 4   | 0.26  | 10   | 0.65   |   |
| 586 | SNORD71        | 2.49 | 6   | 25.86 | 20   | 64.45  |   |

Supplemental Table 3  
 FSH + Ad-E versus FSH + Ad-FOXO1(A3), 24 hours

|     | A              | B    | C    | D     | E    | F      | G |
|-----|----------------|------|------|-------|------|--------|---|
| 587 | Ubxn2a         | 2.49 | 5    | 1.4   | 10   | 3.48   |   |
| 588 | Zfp583         | 2.49 | 4    | 0.45  | 11   | 1.13   |   |
| 589 | Zfp717         | 2.49 | 2    | 0.28  | 4    | 0.69   |   |
| 590 | Zfp819         | 2.49 | 4    | 0.51  | 9    | 1.27   |   |
| 591 | AABR07054262.2 | 2.49 | 3    | 0.64  | 10   | 1.6    |   |
| 592 | Arhgap20       | 2.49 | 3    | 0.15  | 21   | 0.38   |   |
| 593 | Irx2           | 2.49 | 4    | 0.76  | 12   | 1.9    |   |
| 594 | LOC100909526   | 2.49 | 0    | 0.72  | 0    | 1.8    |   |
| 595 | LOC691056      | 2.49 | 9    | 0.51  | 15   | 1.28   |   |
| 596 | Mettl18        | 2.49 | 3    | 0.72  | 10   | 1.8    |   |
| 597 | Pcdhb20        | 2.49 | 3    | 0.32  | 8    | 0.8    |   |
| 598 | Scn7a          | 2.49 | 4    | 0.21  | 14   | 0.53   |   |
| 599 | Ntn4           | 2.47 | 125  | 14.06 | 413  | 34.8   |   |
| 600 | Ckap2l         | 2.47 | 15   | 1.48  | 38   | 3.65   |   |
| 601 | Gm4944         | 2.47 | 15   | 1.09  | 46   | 2.68   |   |
| 602 | Nap1l3         | 2.47 | 10   | 1.29  | 33   | 3.19   |   |
| 603 | Hbegf          | 2.46 | 57   | 8.48  | 195  | 20.9   |   |
| 604 | Ahnak          | 2.46 | 1061 | 21.41 | 3519 | 52.72  |   |
| 605 | Cep55          | 2.46 | 9    | 1.02  | 24   | 2.5    |   |
| 606 | Mrap2          | 2.46 | 54   | 4.54  | 131  | 11.16  |   |
| 607 | Osmr           | 2.46 | 11   | 0.88  | 32   | 2.15   |   |
| 608 | Phospho1       | 2.46 | 7    | 1.27  | 26   | 3.11   |   |
| 609 | Aimp1          | 2.45 | 43   | 11.62 | 129  | 28.47  |   |
| 610 | Lrrfip2        | 2.45 | 64   | 3.6   | 151  | 8.82   |   |
| 611 | LOC100911319_1 | 2.45 | 81   | 11.56 | 289  | 28.31  |   |
| 612 | Nacad          | 2.44 | 25   | 1.58  | 72   | 3.85   |   |
| 613 | Vcl            | 2.44 | 668  | 40.62 | 2147 | 99.04  |   |
| 614 | Dse            | 2.44 | 26   | 1.9   | 93   | 4.63   |   |
| 615 | Samd4a         | 2.44 | 86   | 3.08  | 340  | 7.49   |   |
| 616 | Fos            | 2.43 | 13   | 2.73  | 42   | 6.64   |   |
| 617 | Lurap1l        | 2.43 | 30   | 2.53  | 40   | 6.14   |   |
| 618 | Rnls           | 2.43 | 52   | 0.81  | 74   | 1.96   |   |
| 619 | Tpmt           | 2.43 | 8    | 1.18  | 17   | 2.86   |   |
| 620 | AABR07059632.3 | 2.43 | 1    | 0.33  | 2    | 0.81   |   |
| 621 | Klhl40         | 2.43 | 9    | 1.28  | 27   | 3.11   |   |
| 622 | Nat2           | 2.43 | 8    | 1.05  | 13   | 2.54   |   |
| 623 | Pabpc4l        | 2.43 | 4    | 0.99  | 13   | 2.41   |   |
| 624 | MyI9           | 2.43 | 137  | 44.93 | 453  | 109.11 |   |
| 625 | Fam50a_1       | 2.42 | 0    | 7.18  | 1    | 17.34  |   |
| 626 | Pet100         | 2.42 | 7    | 3.93  | 25   | 9.5    |   |
| 627 | Eml5           | 2.41 | 41   | 0.5   | 98   | 1.2    |   |
| 628 | Rpl26-ps2      | 2.41 | 1    | 7.44  | 3    | 17.92  |   |
| 629 | Kiz            | 2.41 | 42   | 1.39  | 76   | 3.34   |   |
| 630 | Nenf           | 2.41 | 28   | 12.73 | 81   | 30.63  |   |
| 631 | Clic4          | 2.4  | 172  | 44.87 | 539  | 107.9  |   |
| 632 | Vps37d         | 2.39 | 10   | 1.16  | 24   | 2.77   |   |
| 633 | Stbd1          | 2.39 | 5    | 0.94  | 16   | 2.24   |   |
| 634 | Per2           | 2.39 | 28   | 1.31  | 86   | 3.14   |   |
| 635 | Mal2           | 2.38 | 10   | 1.43  | 33   | 3.41   |   |
| 636 | Specc1         | 2.38 | 135  | 4.04  | 403  | 9.61   |   |
| 637 | Fam117a        | 2.37 | 37   | 2.41  | 107  | 5.7    |   |
| 638 | Tes            | 2.37 | 240  | 35.56 | 813  | 84.12  |   |
| 639 | Six4           | 2.36 | 49   | 2.67  | 149  | 6.3    |   |
| 640 | Adgrv1         | 2.36 | 33   | 0.2   | 65   | 0.48   |   |

Supplemental Table 3  
 FSH + Ad-E versus FSH + Ad-FOXO1(A3), 24 hours

|     | A              | B    | C    | D      | E    | F      | G |
|-----|----------------|------|------|--------|------|--------|---|
| 641 | RGD1309730     | 2.36 | 30   | 4.49   | 89   | 10.58  |   |
| 642 | Txnrd3         | 2.35 | 9    | 0.9    | 25   | 2.12   |   |
| 643 | Clip3_2        | 2.35 | 4    | 0.71   | 9    | 1.67   |   |
| 644 | Dfna5          | 2.35 | 16   | 1.64   | 50   | 3.85   |   |
| 645 | Kif5c          | 2.35 | 30   | 1.15   | 85   | 2.71   |   |
| 646 | Ptpdc1         | 2.35 | 13   | 0.75   | 37   | 1.77   |   |
| 647 | snosnR60_Z15_3 | 2.35 | 0    | 31.29  | 1    | 73.52  |   |
| 648 | Tagln          | 2.35 | 588  | 175.26 | 1944 | 411.43 |   |
| 649 | Gadd45a        | 2.35 | 38   | 10.5   | 119  | 24.65  |   |
| 650 | Map1b          | 2.35 | 1856 | 51.2   | 5954 | 120.15 |   |
| 651 | Fam172a        | 2.34 | 76   | 4.89   | 158  | 11.46  |   |
| 652 | Fam129a        | 2.34 | 107  | 8.5    | 358  | 19.88  |   |
| 653 | Cpeb2          | 2.34 | 29   | 1.09   | 69   | 2.55   |   |
| 654 | SNORD89        | 2.34 | 8    | 25.19  | 25   | 58.85  |   |
| 655 | Cutc           | 2.34 | 25   | 2.22   | 51   | 5.2    |   |
| 656 | Vps13b         | 2.34 | 18   | 2.63   | 63   | 6.15   |   |
| 657 | Dstn           | 2.33 | 411  | 93.42  | 1216 | 217.87 |   |
| 658 | Anxa1          | 2.33 | 355  | 78.04  | 1142 | 181.93 |   |
| 659 | Gpatch1        | 2.33 | 34   | 2      | 91   | 4.65   |   |
| 660 | Mob3a          | 2.33 | 38   | 3.96   | 109  | 9.2    |   |
| 661 | Cnn2           | 2.32 | 69   | 41.14  | 184  | 95.56  |   |
| 662 | Gabre          | 2.32 | 29   | 1.53   | 104  | 3.56   |   |
| 663 | Pxdc1          | 2.32 | 40   | 5.88   | 167  | 13.63  |   |
| 664 | Junb           | 2.32 | 20   | 4.06   | 61   | 9.41   |   |
| 665 | Slc35d2        | 2.32 | 40   | 1.82   | 60   | 4.23   |   |
| 666 | Nr0b1          | 2.31 | 81   | 16.27  | 254  | 37.56  |   |
| 667 | Hivep1         | 2.3  | 50   | 3.09   | 164  | 7.1    |   |
| 668 | Col4a4         | 2.3  | 829  | 25.54  | 2597 | 58.68  |   |
| 669 | Slc43a2        | 2.3  | 37   | 2.26   | 107  | 5.18   |   |
| 670 | Gpr176         | 2.29 | 160  | 9.66   | 608  | 22.09  |   |
| 671 | Rab30          | 2.28 | 40   | 4.07   | 118  | 9.29   |   |
| 672 | Tpm4           | 2.28 | 335  | 106.11 | 1018 | 242.36 |   |
| 673 | Rn60_X_0641.1  | 2.28 | 42   | 8.03   | 127  | 18.29  |   |
| 674 | Ston1          | 2.28 | 73   | 7.63   | 241  | 17.38  |   |
| 675 | Tbc1d23        | 2.28 | 217  | 12.77  | 663  | 29.08  |   |
| 676 | Dkk3           | 2.28 | 263  | 18.36  | 834  | 41.77  |   |
| 677 | Spata13        | 2.27 | 239  | 10.12  | 681  | 23.02  |   |
| 678 | Cnst           | 2.26 | 57   | 5.52   | 192  | 12.48  |   |
| 679 | Rras2          | 2.26 | 55   | 7.33   | 175  | 16.57  |   |
| 680 | Ninl           | 2.26 | 325  | 16.28  | 851  | 36.77  |   |
| 681 | Pik3ip1        | 2.25 | 187  | 21.74  | 556  | 48.87  |   |
| 682 | AABR07001497.1 | 2.24 | 4    | 1.37   | 8    | 3.07   |   |
| 683 | AABR07008016.1 | 2.24 | 5    | 3.18   | 18   | 7.12   |   |
| 684 | AABR07015006.1 | 2.24 | 2    | 1.14   | 4    | 2.55   |   |
| 685 | AABR07021220.1 | 2.24 | 0    | 0.28   | 0    | 0.64   |   |
| 686 | AABR07024593.2 | 2.24 | 1    | 2.85   | 3    | 6.39   |   |
| 687 | AABR07044049.1 | 2.24 | 22   | 0.12   | 16   | 0.27   |   |
| 688 | AABR07048280.1 | 2.24 | 0    | 0.62   | 0    | 1.38   |   |
| 689 | AABR07061385.2 | 2.24 | 1    | 0.97   | 3    | 2.18   |   |
| 690 | AABR07071813.1 | 2.24 | 3    | 0.49   | 6    | 1.11   |   |
| 691 | Aadat          | 2.24 | 7    | 0.7    | 13   | 1.57   |   |
| 692 | AC103090.1     | 2.24 | 1    | 2.62   | 3    | 5.88   |   |
| 693 | AC124205.1     | 2.24 | 0    | 0.34   | 0    | 0.77   |   |
| 694 | AC141136.1     | 2.24 | 3    | 0.29   | 4    | 0.64   |   |

Supplemental Table 3  
 FSH + Ad-E versus FSH + Ad-FOXO1(A3), 24 hours

|     | A              | B    | C  | D    | E   | F     | G |
|-----|----------------|------|----|------|-----|-------|---|
| 695 | Adam7          | 2.24 | 11 | 0.1  | 19  | 0.23  |   |
| 696 | Afap111        | 2.24 | 2  | 0.11 | 5   | 0.24  |   |
| 697 | AY172581.23    | 2.24 | 1  | 5.32 | 3   | 11.94 |   |
| 698 | Cenpw          | 2.24 | 2  | 0.45 | 7   | 1.01  |   |
| 699 | Cilp           | 2.24 | 2  | 0.09 | 3   | 0.2   |   |
| 700 | Clic2          | 2.24 | 5  | 0.28 | 6   | 0.62  |   |
| 701 | Cmya5          | 2.24 | 5  | 0.03 | 6   | 0.07  |   |
| 702 | Dazl           | 2.24 | 1  | 0.13 | 3   | 0.28  |   |
| 703 | Emc9           | 2.24 | 1  | 0.1  | 5   | 0.24  |   |
| 704 | Esr1           | 2.24 | 18 | 0.06 | 20  | 0.14  |   |
| 705 | Etv4           | 2.24 | 4  | 0.6  | 13  | 1.34  |   |
| 706 | Fam109a        | 2.24 | 1  | 0.51 | 3   | 1.15  |   |
| 707 | Fam81a         | 2.24 | 7  | 0.28 | 12  | 0.64  |   |
| 708 | Fgfbp3         | 2.24 | 2  | 0.42 | 6   | 0.94  |   |
| 709 | Ggn            | 2.24 | 9  | 0.6  | 15  | 1.35  |   |
| 710 | Gtpbp8         | 2.24 | 29 | 1.81 | 44  | 4.06  |   |
| 711 | Gulp1          | 2.24 | 91 | 3.38 | 202 | 7.59  |   |
| 712 | Hlf            | 2.24 | 4  | 0.41 | 5   | 0.91  |   |
| 713 | Hpd1           | 2.24 | 1  | 0.23 | 3   | 0.51  |   |
| 714 | Inpp5j         | 2.24 | 2  | 0.11 | 3   | 0.24  |   |
| 715 | Kcnv2          | 2.24 | 2  | 0.07 | 4   | 0.16  |   |
| 716 | L3hypdh        | 2.24 | 3  | 0.39 | 7   | 0.88  |   |
| 717 | LOC100359687   | 2.24 | 0  | 1.69 | 0   | 3.79  |   |
| 718 | LOC100363068_2 | 2.24 | 0  | 1.63 | 0   | 3.66  |   |
| 719 | LOC100911305   | 2.24 | 0  | 0.62 | 0   | 1.38  |   |
| 720 | LOC100911938   | 2.24 | 0  | 0.19 | 0   | 0.42  |   |
| 721 | LOC102555249   | 2.24 | 2  | 2.25 | 6   | 5.04  |   |
| 722 | LOC102556119   | 2.24 | 1  | 0.14 | 3   | 0.31  |   |
| 723 | LOC501033      | 2.24 | 1  | 0.12 | 3   | 0.28  |   |
| 724 | LOC682489      | 2.24 | 11 | 0.58 | 14  | 1.3   |   |
| 725 | LOC686013      | 2.24 | 8  | 0.25 | 14  | 0.56  |   |
| 726 | LOC691153      | 2.24 | 1  | 0.24 | 3   | 0.53  |   |
| 727 | Lyplal1        | 2.24 | 22 | 3.56 | 52  | 7.97  |   |
| 728 | Mb21d1         | 2.24 | 4  | 0.71 | 13  | 1.59  |   |
| 729 | Mkrn2os        | 2.24 | 6  | 0.12 | 14  | 0.28  |   |
| 730 | Ngf            | 2.24 | 2  | 0.16 | 4   | 0.37  |   |
| 731 | Nlrp3          | 2.24 | 2  | 0.17 | 8   | 0.39  |   |
| 732 | Pinx1          | 2.24 | 38 | 3.05 | 78  | 6.85  |   |
| 733 | Ppfia4         | 2.24 | 2  | 0.06 | 3   | 0.13  |   |
| 734 | Rab27b         | 2.24 | 16 | 0.82 | 22  | 1.83  |   |
| 735 | RGD1561928     | 2.24 | 0  | 0.6  | 0   | 1.35  |   |
| 736 | RGD1562029     | 2.24 | 15 | 0.11 | 10  | 0.25  |   |
| 737 | RGD1564792     | 2.24 | 3  | 2.34 | 9   | 5.24  |   |
| 738 | Rn60_5_0814.26 | 2.24 | 0  | 0.21 | 0   | 0.46  |   |
| 739 | Robo3          | 2.24 | 1  | 0.06 | 3   | 0.14  |   |
| 740 | Scai           | 2.24 | 66 | 3.11 | 128 | 6.98  |   |
| 741 | Slc9a9         | 2.24 | 39 | 0.31 | 64  | 0.7   |   |
| 742 | St8sia1        | 2.24 | 8  | 0.8  | 19  | 1.8   |   |
| 743 | Styx           | 2.24 | 56 | 1.5  | 79  | 3.36  |   |
| 744 | Tal2           | 2.24 | 6  | 0.31 | 6   | 0.69  |   |
| 745 | Thoc1_2        | 2.24 | 3  | 1.05 | 8   | 2.36  |   |
| 746 | Tmem108        | 2.24 | 2  | 0.43 | 7   | 0.97  |   |
| 747 | Ttc39a         | 2.24 | 0  | 0.19 | 0   | 0.43  |   |
| 748 | Uaca           | 2.24 | 15 | 0.69 | 36  | 1.55  |   |

Supplemental Table 3  
 FSH + Ad-E versus FSH + Ad-FOXO1(A3), 24 hours

|     | A              | B    | C  | D    | E  | F     | G |
|-----|----------------|------|----|------|----|-------|---|
| 749 | Uqcr10_2       | 2.24 | 2  | 3.77 | 6  | 8.46  |   |
| 750 | Usp50          | 2.24 | 27 | 0.23 | 28 | 0.52  |   |
| 751 | Wdr93          | 2.24 | 9  | 0.17 | 6  | 0.39  |   |
| 752 | Zbtb39         | 2.24 | 0  | 0.06 | 2  | 0.14  |   |
| 753 | AABR07001392.1 | 2.24 | 0  | 0.23 | 0  | 0.51  |   |
| 754 | AABR07020847.1 | 2.24 | 1  | 0.46 | 2  | 1.03  |   |
| 755 | AABR07027519.1 | 2.24 | 0  | 1.42 | 0  | 3.18  |   |
| 756 | AABR07031388.1 | 2.24 | 1  | 0.14 | 3  | 0.32  |   |
| 757 | AABR07031674.2 | 2.24 | 1  | 0.38 | 1  | 0.85  |   |
| 758 | AABR07036010.1 | 2.24 | 3  | 0.52 | 4  | 1.16  |   |
| 759 | AABR07043844.1 | 2.24 | 1  | 0.81 | 3  | 1.81  |   |
| 760 | AABR07053136.1 | 2.24 | 4  | 4.6  | 12 | 10.31 |   |
| 761 | AABR07055792.1 | 2.24 | 0  | 0.39 | 0  | 0.87  |   |
| 762 | AABR07059258.1 | 2.24 | 18 | 0.46 | 43 | 1.04  |   |
| 763 | AABR07071904.1 | 2.24 | 3  | 0.31 | 9  | 0.7   |   |
| 764 | AABR07072054.1 | 2.24 | 0  | 0.26 | 0  | 0.58  |   |
| 765 | AC121204.2     | 2.24 | 0  | 1.01 | 1  | 2.26  |   |
| 766 | AC130232.1     | 2.24 | 0  | 1.15 | 0  | 2.58  |   |
| 767 | AC131360.2     | 2.24 | 1  | 0.15 | 3  | 0.34  |   |
| 768 | AC133265.1     | 2.24 | 5  | 5.42 | 13 | 12.17 |   |
| 769 | Atp4a          | 2.24 | 2  | 0.1  | 10 | 0.23  |   |
| 770 | Bcl2l10        | 2.24 | 1  | 0.34 | 3  | 0.76  |   |
| 771 | Bmp15          | 2.24 | 2  | 0.24 | 6  | 0.54  |   |
| 772 | Btnl8          | 2.24 | 3  | 0.17 | 3  | 0.39  |   |
| 773 | Cacna1g        | 2.24 | 14 | 0.09 | 25 | 0.21  |   |
| 774 | Ccdc30         | 2.24 | 23 | 0.14 | 21 | 0.31  |   |
| 775 | Cldn2          | 2.24 | 1  | 0.08 | 4  | 0.18  |   |
| 776 | Dnaaf3         | 2.24 | 1  | 0.15 | 4  | 0.34  |   |
| 777 | Ears2_2        | 2.24 | 2  | 0.69 | 4  | 1.56  |   |
| 778 | Eng            | 2.24 | 3  | 0.36 | 12 | 0.8   |   |
| 779 | Fam213b        | 2.24 | 1  | 0.83 | 7  | 1.85  |   |
| 780 | Foxc1          | 2.24 | 1  | 0.09 | 3  | 0.2   |   |
| 781 | Frmd4b         | 2.24 | 22 | 0.49 | 47 | 1.1   |   |
| 782 | Frrs1l         | 2.24 | 4  | 0.41 | 8  | 0.92  |   |
| 783 | G6b            | 2.24 | 1  | 0.43 | 4  | 0.96  |   |
| 784 | Gabrq          | 2.24 | 1  | 0.19 | 3  | 0.43  |   |
| 785 | Gas2           | 2.24 | 4  | 0.14 | 7  | 0.31  |   |
| 786 | Gucy1a2        | 2.24 | 22 | 0.17 | 28 | 0.37  |   |
| 787 | Hgf            | 2.24 | 2  | 0.06 | 5  | 0.14  |   |
| 788 | Hhip           | 2.24 | 3  | 0.13 | 7  | 0.29  |   |
| 789 | Hydin          | 2.24 | 11 | 0.02 | 8  | 0.05  |   |
| 790 | Igip           | 2.24 | 1  | 2.23 | 3  | 5.01  |   |
| 791 | Klf2           | 2.24 | 3  | 1.03 | 9  | 2.31  |   |
| 792 | Klf5           | 2.24 | 16 | 2.12 | 52 | 4.77  |   |
| 793 | Klhl29         | 2.24 | 16 | 0.14 | 32 | 0.32  |   |
| 794 | Lacc1          | 2.24 | 5  | 1.35 | 17 | 3.03  |   |
| 795 | Lhb            | 2.24 | 1  | 0.16 | 5  | 0.35  |   |
| 796 | LOC100362342   | 2.24 | 2  | 0.47 | 6  | 1.06  |   |
| 797 | LOC100910173   | 2.24 | 16 | 2.46 | 36 | 5.52  |   |
| 798 | LOC100911295   | 2.24 | 0  | 1.24 | 0  | 2.79  |   |
| 799 | LOC100911776   | 2.24 | 0  | 0.57 | 1  | 1.29  |   |
| 800 | LOC100912283   | 2.24 | 2  | 0.41 | 6  | 0.92  |   |
| 801 | LOC500124      | 2.24 | 7  | 0.18 | 23 | 0.41  |   |
| 802 | LOC688130      | 2.24 | 1  | 0.44 | 3  | 0.98  |   |

Supplemental Table 3  
 FSH + Ad-E versus FSH + Ad-FOXO1(A3), 24 hours

|     | A          | B    | C  | D     | E  | F     | G |
|-----|------------|------|----|-------|----|-------|---|
| 803 | Lrrc34     | 2.24 | 5  | 0.37  | 13 | 0.83  |   |
| 804 | Lrrc51     | 2.24 | 5  | 0.5   | 5  | 1.12  |   |
| 805 | Lym7       | 2.24 | 4  | 0.4   | 7  | 0.91  |   |
| 806 | Mansc1     | 2.24 | 5  | 0.63  | 13 | 1.42  |   |
| 807 | Map2k3     | 2.24 | 0  | 3.75  | 0  | 8.42  |   |
| 808 | MGC95208   | 2.24 | 2  | 2.7   | 13 | 6.06  |   |
| 809 | Mns1       | 2.24 | 7  | 0.2   | 5  | 0.45  |   |
| 810 | Mnt        | 2.24 | 22 | 3.7   | 46 | 8.3   |   |
| 811 | Muc6       | 2.24 | 7  | 0.21  | 17 | 0.47  |   |
| 812 | Ncf1       | 2.24 | 1  | 0.13  | 3  | 0.28  |   |
| 813 | Nr1h3      | 2.24 | 2  | 0.22  | 4  | 0.5   |   |
| 814 | Oas1h      | 2.24 | 2  | 0.21  | 6  | 0.48  |   |
| 815 | Olr119     | 2.24 | 1  | 0.38  | 3  | 0.85  |   |
| 816 | Ovol1      | 2.24 | 2  | 0.13  | 6  | 0.29  |   |
| 817 | Pear1      | 2.24 | 2  | 0.08  | 4  | 0.18  |   |
| 818 | Pfkfb4_2   | 2.24 | 0  | 0.32  | 0  | 0.71  |   |
| 819 | Pid1       | 2.24 | 11 | 0.5   | 23 | 1.12  |   |
| 820 | Prorsd1    | 2.24 | 3  | 1.05  | 9  | 2.37  |   |
| 821 | Prr20e     | 2.24 | 1  | 0.72  | 3  | 1.62  |   |
| 822 | Rab25      | 2.24 | 2  | 0.33  | 7  | 0.75  |   |
| 823 | RGD1308750 | 2.24 | 0  | 0.17  | 1  | 0.39  |   |
| 824 | RGD1561694 | 2.24 | 1  | 0.57  | 0  | 1.29  |   |
| 825 | RGD1562399 | 2.24 | 0  | 0.83  | 2  | 1.85  |   |
| 826 | RGD1563045 | 2.24 | 1  | 0.45  | 1  | 1.01  |   |
| 827 | RGD1564899 | 2.24 | 3  | 0.23  | 8  | 0.52  |   |
| 828 | RGD1565635 | 2.24 | 2  | 0.43  | 6  | 0.98  |   |
| 829 | Rnf17      | 2.24 | 4  | 0.07  | 7  | 0.16  |   |
| 830 | Rps19l1    | 2.24 | 0  | 0.77  | 3  | 1.72  |   |
| 831 | Rps27l3    | 2.24 | 0  | 0.8   | 0  | 1.79  |   |
| 832 | Rsph3      | 2.24 | 27 | 0.99  | 58 | 2.23  |   |
| 833 | SCARNA13_1 | 2.24 | 1  | 1.32  | 3  | 2.95  |   |
| 834 | SCARNA18_2 | 2.24 | 3  | 13.75 | 9  | 30.84 |   |
| 835 | Sdhaf3     | 2.24 | 10 | 0.71  | 10 | 1.59  |   |
| 836 | Sec31b     | 2.24 | 3  | 0.08  | 3  | 0.17  |   |
| 837 | Sertad4    | 2.24 | 6  | 0.74  | 18 | 1.66  |   |
| 838 | Sgtb       | 2.24 | 9  | 1.22  | 31 | 2.75  |   |
| 839 | Shank3     | 2.24 | 5  | 0.14  | 9  | 0.31  |   |
| 840 | Skida1     | 2.24 | 1  | 0.15  | 3  | 0.33  |   |
| 841 | Slc35g3    | 2.24 | 1  | 0.28  | 3  | 0.62  |   |
| 842 | Slc6a15    | 2.24 | 5  | 0.28  | 11 | 0.62  |   |
| 843 | Snap23     | 2.24 | 28 | 4.58  | 63 | 10.26 |   |
| 844 | SNORA52_1  | 2.24 | 0  | 2.7   | 0  | 6.06  |   |
| 845 | SNORA57_1  | 2.24 | 1  | 2.45  | 3  | 5.49  |   |
| 846 | SNORD31    | 2.24 | 2  | 10.81 | 6  | 24.24 |   |
| 847 | Sox9       | 2.24 | 1  | 0.11  | 3  | 0.24  |   |
| 848 | Spata1     | 2.24 | 11 | 0.39  | 18 | 0.87  |   |
| 849 | Spata17    | 2.24 | 18 | 0.21  | 23 | 0.47  |   |
| 850 | Spata31d1d | 2.24 | 1  | 0.09  | 6  | 0.21  |   |
| 851 | Stk32c     | 2.24 | 8  | 0.17  | 7  | 0.37  |   |
| 852 | Tmeff1     | 2.24 | 9  | 0.73  | 27 | 1.64  |   |
| 853 | Tnfaip8l1  | 2.24 | 1  | 0.65  | 3  | 1.45  |   |
| 854 | Tnik       | 2.24 | 23 | 0.75  | 50 | 1.68  |   |
| 855 | Trpv2      | 2.24 | 2  | 0.13  | 5  | 0.29  |   |
| 856 | Upk1a      | 2.24 | 3  | 0.3   | 5  | 0.67  |   |



Supplemental Table 3  
 FSH + Ad-E versus FSH + Ad-FOXO1(A3), 24 hours

|     | A              | B    | C    | D      | E    | F      | G |
|-----|----------------|------|------|--------|------|--------|---|
| 857 | Zbtb16         | 2.24 | 9    | 0.14   | 12   | 0.31   |   |
| 858 | Zfand1         | 2.24 | 14   | 3.59   | 30   | 8.05   |   |
| 859 | Zfhx4          | 2.24 | 7    | 0.03   | 7    | 0.06   |   |
| 860 | Zfp54          | 2.24 | 10   | 0.7    | 16   | 1.57   |   |
| 861 | Zfp599         | 2.24 | 32   | 0.6    | 63   | 1.33   |   |
| 862 | Akt3           | 2.22 | 91   | 7.72   | 232  | 17.16  |   |
| 863 | Cox7a2_1       | 2.22 | 182  | 218.91 | 607  | 485.89 |   |
| 864 | Snf8           | 2.22 | 44   | 12.9   | 121  | 28.64  |   |
| 865 | Gpnmb          | 2.22 | 96   | 14.45  | 288  | 32.05  |   |
| 866 | Rictor         | 2.22 | 176  | 7.52   | 498  | 16.67  |   |
| 867 | Diaph3         | 2.22 | 51   | 3.09   | 153  | 6.86   |   |
| 868 | Surf6          | 2.22 | 43   | 5.01   | 82   | 11.11  |   |
| 869 | Amot           | 2.22 | 57   | 2.74   | 171  | 6.07   |   |
| 870 | Rbms1          | 2.21 | 268  | 13.04  | 616  | 28.88  |   |
| 871 | AABR07047011.1 | 2.21 | 16   | 2.58   | 47   | 5.7    |   |
| 872 | Rpl24          | 2.21 | 517  | 379.85 | 1569 | 839.2  |   |
| 873 | Sik2           | 2.21 | 559  | 20.8   | 1692 | 45.93  |   |
| 874 | Actg1          | 2.2  | 2    | 6.1    | 13   | 13.44  |   |
| 875 | Auh            | 2.2  | 52   | 5      | 112  | 11     |   |
| 876 | Myo1d          | 2.19 | 116  | 5.15   | 359  | 11.29  |   |
| 877 | Ifitm1         | 2.19 | 58   | 37.61  | 172  | 82.45  |   |
| 878 | Foxp1          | 2.19 | 535  | 36.66  | 1399 | 80.31  |   |
| 879 | AABR07026197.1 | 2.19 | 10   | 1.26   | 25   | 2.76   |   |
| 880 | Aatf           | 2.19 | 77   | 5.67   | 168  | 12.41  |   |
| 881 | Kif18a         | 2.18 | 19   | 1.24   | 42   | 2.71   |   |
| 882 | Serpinb6       | 2.18 | 150  | 37.25  | 432  | 81.15  |   |
| 883 | Pls3           | 2.18 | 491  | 46.1   | 1433 | 100.4  |   |
| 884 | RGD1564804     | 2.17 | 16   | 3.17   | 34   | 6.89   |   |
| 885 | Tnfrsf12a      | 2.17 | 34   | 12.41  | 108  | 26.98  |   |
| 886 | Ajuba          | 2.17 | 106  | 10.54  | 281  | 22.89  |   |
| 887 | Cdc42ep2       | 2.17 | 10   | 2.65   | 30   | 5.75   |   |
| 888 | Tns2           | 2.17 | 15   | 0.86   | 33   | 1.87   |   |
| 889 | Inadl          | 2.17 | 164  | 5.53   | 460  | 11.98  |   |
| 890 | Dock4          | 2.17 | 216  | 7.67   | 622  | 16.61  |   |
| 891 | Sqrdl          | 2.16 | 23   | 3.67   | 58   | 7.93   |   |
| 892 | LOC499339      | 2.16 | 45   | 6.52   | 72   | 14.06  |   |
| 893 | Chchd2         | 2.16 | 0    | 13.78  | 1    | 29.72  |   |
| 894 | Sash1          | 2.16 | 98   | 4.79   | 271  | 10.32  |   |
| 895 | Actn4          | 2.15 | 1176 | 108.37 | 3511 | 233.2  |   |
| 896 | Mss51          | 2.15 | 35   | 1.82   | 82   | 3.92   |   |
| 897 | Preli2         | 2.14 | 31   | 1.62   | 79   | 3.46   |   |
| 898 | Slc29a1        | 2.14 | 11   | 1.2    | 22   | 2.56   |   |
| 899 | Gypc           | 2.13 | 35   | 6.77   | 114  | 14.45  |   |
| 900 | Zhx1           | 2.13 | 5    | 2.16   | 11   | 4.6    |   |
| 901 | Prr15          | 2.13 | 151  | 37.87  | 431  | 80.73  |   |
| 902 | Dnajb4         | 2.13 | 112  | 13.85  | 293  | 29.49  |   |
| 903 | Ube2a          | 2.12 | 40   | 10.53  | 104  | 22.35  |   |
| 904 | AABR07001099.1 | 2.12 | 7    | 1.36   | 22   | 2.88   |   |
| 905 | Exoc6          | 2.12 | 35   | 1.43   | 72   | 3.04   |   |
| 906 | Gpld1          | 2.12 | 14   | 0.68   | 43   | 1.44   |   |
| 907 | Hectd2         | 2.12 | 25   | 0.86   | 64   | 1.81   |   |
| 908 | LOC100360150   | 2.12 | 3    | 3.52   | 8    | 7.46   |   |
| 909 | Rn60_10_0891.3 | 2.12 | 2    | 0.46   | 4    | 0.98   |   |
| 910 | Spon2_1        | 2.12 | 4    | 1.15   | 12   | 2.44   |   |

Supplemental Table 3  
 FSH + Ad-E versus FSH + Ad-FOXO1(A3), 24 hours

|     | A              | B    | C    | D     | E    | F      | G |
|-----|----------------|------|------|-------|------|--------|---|
| 911 | Dusp1          | 2.12 | 60   | 11.03 | 170  | 23.35  |   |
| 912 | Mttr12         | 2.11 | 78   | 5.73  | 166  | 12.09  |   |
| 913 | Ccdc174        | 2.11 | 24   | 3.47  | 57   | 7.32   |   |
| 914 | Zfp608         | 2.11 | 69   | 3.04  | 212  | 6.42   |   |
| 915 | Mtif2          | 2.11 | 42   | 1.51  | 52   | 3.17   |   |
| 916 | Utrn           | 2.11 | 365  | 6.37  | 887  | 13.41  |   |
| 917 | Gls            | 2.1  | 1592 | 58.51 | 4817 | 122.92 |   |
| 918 | Gatm           | 2.1  | 24   | 3.01  | 60   | 6.32   |   |
| 919 | Wt1            | 2.1  | 45   | 4.28  | 122  | 8.99   |   |
| 920 | Crebzf         | 2.1  | 127  | 20.73 | 307  | 43.48  |   |
| 921 | AABR07057196.1 | 2.09 | 5    | 2.39  | 16   | 5.01   |   |
| 922 | Agbl3          | 2.09 | 22   | 0.38  | 58   | 0.8    |   |
| 923 | LOC102554591   | 2.09 | 14   | 0.39  | 33   | 0.82   |   |
| 924 | Mtf1           | 2.09 | 0    | 0.42  | 0    | 0.88   |   |
| 925 | Pcdhb4         | 2.09 | 5    | 0.71  | 13   | 1.49   |   |
| 926 | SNORA7_1       | 2.09 | 0    | 12.93 | 0    | 27.07  |   |
| 927 | Zc2hc1a        | 2.09 | 32   | 3.18  | 95   | 6.65   |   |
| 928 | Bmper          | 2.09 | 12   | 0.48  | 20   | 1      |   |
| 929 | Rsg1           | 2.09 | 6    | 0.48  | 14   | 1.01   |   |
| 930 | Ahnak2         | 2.09 | 98   | 2.09  | 277  | 4.37   |   |
| 931 | Rab3gap2       | 2.09 | 141  | 8.55  | 385  | 17.86  |   |
| 932 | Pmepa1         | 2.09 | 41   | 4.15  | 83   | 8.66   |   |
| 933 | Col5a2         | 2.08 | 690  | 55.09 | 1975 | 114.81 |   |
| 934 | Nedd9          | 2.08 | 45   | 2.79  | 126  | 5.81   |   |
| 935 | Prkca          | 2.08 | 82   | 3.04  | 244  | 6.32   |   |
| 936 | Ppp2r1b        | 2.08 | 187  | 15.32 | 525  | 31.84  |   |
| 937 | Pkp2           | 2.08 | 140  | 15.22 | 415  | 31.63  |   |
| 938 | Arl4a          | 2.08 | 19   | 6.3   | 51   | 13.09  |   |
| 939 | Chmp6          | 2.08 | 26   | 6.27  | 63   | 13.03  |   |
| 940 | Katnal1_2      | 2.08 | 0    | 1.45  | 0    | 3.01   |   |
| 941 | 1700021K19Rik  | 2.07 | 112  | 7.64  | 250  | 15.83  |   |
| 942 | Akap2          | 2.07 | 194  | 17.15 | 509  | 35.5   |   |
| 943 | Rock2          | 2.07 | 288  | 11.98 | 766  | 24.75  |   |
| 944 | Irs2           | 2.06 | 265  | 13.81 | 739  | 28.48  |   |
| 945 | AABR07031399.1 | 2.06 | 8    | 0.47  | 19   | 0.97   |   |
| 946 | AABR07037058.1 | 2.06 | 11   | 4.83  | 11   | 9.93   |   |
| 947 | RGD1310257     | 2.06 | 20   | 0.56  | 36   | 1.16   |   |
| 948 | AABR07010705.1 | 2.06 | 5    | 2.6   | 15   | 5.35   |   |
| 949 | AABR07042903.1 | 2.06 | 1    | 3.25  | 1    | 6.68   |   |
| 950 | Elovl6_1       | 2.06 | 0    | 1.3   | 2    | 2.68   |   |
| 951 | LOC100360791   | 2.06 | 6    | 5.58  | 14   | 11.47  |   |
| 952 | LOC100911361   | 2.06 | 13   | 4.9   | 41   | 10.08  |   |
| 953 | LOC102557117   | 2.06 | 1    | 7.79  | 9    | 16.01  |   |
| 954 | LOC103693683   | 2.06 | 5    | 0.42  | 20   | 0.87   |   |
| 955 | Mars2          | 2.06 | 0    | 0.82  | 0    | 1.69   |   |
| 956 | Nudt15         | 2.06 | 17   | 1.36  | 23   | 2.79   |   |
| 957 | Shq1           | 2.06 | 18   | 0.98  | 32   | 2.02   |   |
| 958 | Tmbim1         | 2.06 | 4    | 0.39  | 8    | 0.8    |   |
| 959 | Tmod1          | 2.06 | 23   | 1.14  | 40   | 2.35   |   |
| 960 | Wdr86          | 2.06 | 7    | 0.83  | 15   | 1.7    |   |
| 961 | Wisp2          | 2.06 | 5    | 0.8   | 15   | 1.65   |   |
| 962 | Metrn1         | 2.05 | 319  | 60.87 | 890  | 124.9  |   |
| 963 | Oca2           | 2.05 | 321  | 13.53 | 729  | 27.69  |   |
| 964 | Nid1           | 2.04 | 97   | 5.46  | 253  | 11.16  |   |

Supplemental Table 3  
 FSH + Ad-E versus FSH + Ad-FOXO1(A3), 24 hours

|      | A              | B    | C   | D     | E    | F     | G                                                                          |
|------|----------------|------|-----|-------|------|-------|----------------------------------------------------------------------------|
| 965  | Rpl22l1        | 2.03 | 42  | 32.33 | 117  | 65.74 |                                                                            |
| 966  | Hmgcl1         | 2.03 | 24  | 0.65  | 56   | 1.33  |                                                                            |
| 967  | Srgap1         | 2.03 | 92  | 2.33  | 219  | 4.74  |                                                                            |
| 968  | Zgrf1          | 2.03 | 17  | 0.51  | 31   | 1.04  |                                                                            |
| 969  | Brip1          | 2.03 | 33  | 0.58  | 52   | 1.18  |                                                                            |
| 970  | Cox18          | 2.03 | 36  | 1.89  | 60   | 3.84  |                                                                            |
| 971  | Haus8          | 2.03 | 35  | 3.46  | 68   | 7.02  |                                                                            |
| 972  | Myc            | 2.03 | 24  | 3.25  | 59   | 6.6   |                                                                            |
| 973  | Sf3b6          | 2.03 | 25  | 13.63 | 59   | 27.65 |                                                                            |
| 974  | Tspyl5         | 2.03 | 7   | 2.06  | 19   | 4.17  |                                                                            |
| 975  | Stam2          | 2.03 | 72  | 8.08  | 171  | 16.39 |                                                                            |
| 976  | Snph           | 2.02 | 29  | 1.31  | 91   | 2.65  |                                                                            |
| 977  | Itgav          | 2.02 | 411 | 39.13 | 1082 | 79.15 |                                                                            |
| 978  | Coq7           | 2.02 | 15  | 3.96  | 33   | 7.99  |                                                                            |
| 979  | Tcaim          | 2.02 | 38  | 2.02  | 63   | 4.09  |                                                                            |
| 980  | Adamts6        | 2.02 | 47  | 2.06  | 176  | 4.17  |                                                                            |
| 981  | Inf2           | 2.02 | 52  | 4.84  | 148  | 9.77  |                                                                            |
| 982  | Pter           | 2.02 | 25  | 1.74  | 45   | 3.52  |                                                                            |
| 983  | Tcf19          | 2.02 | 11  | 4.32  | 27   | 8.72  |                                                                            |
| 984  | Arhgap21       | 2.02 | 328 | 14.73 | 841  | 29.72 |                                                                            |
| 985  | Ankrd50        | 2.02 | 143 | 5.7   | 386  | 11.5  |                                                                            |
| 986  | Mtr            | 2.02 | 96  | 5.19  | 243  | 10.46 |                                                                            |
| 987  | Olfml2a        | 2.02 | 35  | 2.03  | 97   | 4.09  |                                                                            |
| 988  | Zscan12        | 2.02 | 37  | 4.12  | 71   | 8.3   |                                                                            |
| 989  | Eapp           | 2.01 | 51  | 11.37 | 116  | 22.91 |                                                                            |
| 990  | Pam16          | 2.01 | 28  | 9.02  | 55   | 18.15 |                                                                            |
| 991  | Zscan20        | 2.01 | 26  | 1.26  | 64   | 2.54  |                                                                            |
| 992  | Ldlrad4        | 2    | 106 | 1.83  | 140  | 3.67  |                                                                            |
| 993  | Mcmcdc2        | 2    | 52  | 1.55  | 79   | 3.12  |                                                                            |
| 994  | Mllt4          | 2    | 390 | 20.01 | 1013 | 40.05 |                                                                            |
| 995  | Cttnbp2nl      | 2    | 134 | 8.83  | 341  | 17.67 |                                                                            |
| 996  | Esyt1          | 1.99 | 402 | 41.41 | 1055 | 82.61 | Genes not used for Pathway Studio Analysis & not regulated by Ad-FOXO1(A3) |
| 997  | AABR07043748.2 | 1.99 | 10  | 1.47  | 11   | 2.93  |                                                                            |
| 998  | AABR07061336.1 | 1.99 | 0   | 2.06  | 1    | 4.1   |                                                                            |
| 999  | AABR07019083.1 | 1.99 | 9   | 4.28  | 29   | 8.53  |                                                                            |
| 1000 | AABR07035796.1 | 1.99 | 9   | 4.86  | 24   | 9.68  |                                                                            |
| 1001 | Adrb2          | 1.99 | 11  | 2.13  | 32   | 4.24  |                                                                            |
| 1002 | Casp12         | 1.99 | 16  | 1.59  | 24   | 3.17  |                                                                            |
| 1003 | Cyp3a9_1       | 1.99 | 3   | 0.65  | 8    | 1.3   |                                                                            |
| 1004 | Dgkb           | 1.99 | 30  | 0.17  | 67   | 0.33  |                                                                            |
| 1005 | Fam114a111     | 1.99 | 2   | 0.62  | 6    | 1.23  |                                                                            |
| 1006 | Fas            | 1.99 | 8   | 0.43  | 10   | 0.85  |                                                                            |
| 1007 | Homer2         | 1.99 | 9   | 1.09  | 26   | 2.18  |                                                                            |
| 1008 | Kihl31         | 1.99 | 4   | 0.18  | 10   | 0.35  |                                                                            |
| 1009 | Mfsd6          | 1.99 | 51  | 3.06  | 125  | 6.1   |                                                                            |
| 1010 | Ormdl1         | 1.99 | 39  | 2.94  | 68   | 5.87  |                                                                            |
| 1011 | Praf2          | 1.99 | 11  | 6.1   | 27   | 12.17 |                                                                            |
| 1012 | Trmt13         | 1.99 | 36  | 1.47  | 70   | 2.93  |                                                                            |
| 1013 | Colec12        | 1.99 | 25  | 0.75  | 37   | 1.5   |                                                                            |

Supplemental Table 3  
 FSH + Ad-E versus FSH + Ad-FOXO1(A3), 24 hours

|      | A          | B    | C    | D      | E     | F      | G |
|------|------------|------|------|--------|-------|--------|---|
| 1014 | Gfra2      | 1.99 | 6    | 0.39   | 10    | 0.78   |   |
| 1015 | Klc3       | 1.99 | 2    | 0.62   | 8     | 1.24   |   |
| 1016 | Rph3al     | 1.99 | 22   | 0.55   | 20    | 1.09   |   |
| 1017 | Rpl36al_1  | 1.99 | 0    | 3.38   | 0     | 6.75   |   |
| 1018 | Mospd3     | 1.99 | 157  | 54.87  | 414   | 109.03 |   |
| 1019 | Ppp1r18    | 1.99 | 21   | 4.08   | 52    | 8.1    |   |
| 1020 | Rb1cc1     | 1.98 | 183  | 7.6    | 490   | 15.04  |   |
| 1021 | Chn1       | 1.98 | 49   | 3.34   | 124   | 6.61   |   |
| 1022 | Zfp213     | 1.98 | 50   | 2.11   | 58    | 4.17   |   |
| 1023 | App1       | 1.97 | 47   | 5.58   | 122   | 11     |   |
| 1024 | Aldh1a1    | 1.97 | 476  | 75.53  | 1296  | 148.91 |   |
| 1025 | Golm1      | 1.97 | 29   | 3.34   | 63    | 6.57   |   |
| 1026 | Shisa7     | 1.97 | 14   | 0.65   | 32    | 1.29   |   |
| 1027 | Thbs1      | 1.97 | 5750 | 551.57 | 15413 | 1086.7 |   |
| 1028 | RGD1304622 | 1.97 | 27   | 2.02   | 68    | 3.96   |   |
| 1029 | Nrp2       | 1.97 | 181  | 9.21   | 504   | 18.11  |   |
| 1030 | Slc25a27   | 1.96 | 14   | 0.74   | 42    | 1.46   |   |
| 1031 | Sync       | 1.96 | 24   | 1.34   | 51    | 2.64   |   |
| 1032 | Trim44     | 1.96 | 40   | 5.47   | 65    | 10.71  |   |
| 1033 | Nrp1       | 1.96 | 119  | 7.13   | 316   | 13.96  |   |
| 1034 | Ankrd28    | 1.96 | 200  | 14.35  | 529   | 28.09  |   |
| 1035 | Mrpl32     | 1.95 | 37   | 16.97  | 97    | 33.13  |   |
| 1036 | MGC108823  | 1.95 | 27   | 16.35  | 75    | 31.93  |   |
| 1037 | Pxk        | 1.95 | 83   | 5.31   | 194   | 10.36  |   |
| 1038 | Zfp498     | 1.95 | 42   | 3.79   | 84    | 7.4    |   |
| 1039 | SNORD49_2  | 1.95 | 28   | 140.8  | 73    | 274.45 |   |
| 1040 | Slc2a12    | 1.94 | 7    | 0.44   | 15    | 0.85   |   |
| 1041 | Wwox       | 1.94 | 6    | 4.22   | 16    | 8.2    |   |
| 1042 | Cyp26b1    | 1.94 | 6    | 0.4    | 16    | 0.77   |   |
| 1043 | Exosc8     | 1.94 | 23   | 1.99   | 40    | 3.87   |   |
| 1044 | Mrfap1_1   | 1.94 | 1    | 0.42   | 3     | 0.81   |   |
| 1045 | Rbm11      | 1.94 | 6    | 0.98   | 15    | 1.9    |   |
| 1046 | Snx10      | 1.94 | 18   | 1.3    | 29    | 2.52   |   |
| 1047 | Ankrd44    | 1.94 | 121  | 5.01   | 303   | 9.7    |   |
| 1048 | AC094212.1 | 1.94 | 0    | 6.01   | 2     | 11.62  |   |
| 1049 | Terf2      | 1.94 | 67   | 6.21   | 133   | 12.02  |   |
| 1050 | Akap17a    | 1.94 | 59   | 5.78   | 144   | 11.18  |   |
| 1051 | Abl2       | 1.93 | 210  | 3.94   | 384   | 7.62   |   |
| 1052 | SNORD81    | 1.93 | 12   | 56.43  | 31    | 108.98 |   |
| 1053 | Ncam2      | 1.93 | 51   | 1.37   | 104   | 2.65   |   |
| 1054 | Cdc42ep3   | 1.93 | 42   | 7.23   | 114   | 13.93  |   |
| 1055 | Lclat1     | 1.93 | 41   | 2.81   | 78    | 5.41   |   |
| 1056 | Stc1       | 1.93 | 133  | 11.64  | 337   | 22.43  |   |
| 1057 | Myof       | 1.92 | 336  | 13.73  | 912   | 26.4   |   |
| 1058 | Apoe       | 1.92 | 28   | 6.52   | 76    | 12.53  |   |
| 1059 | Pcdh19     | 1.92 | 28   | 1.75   | 77    | 3.37   |   |
| 1060 | Pigb       | 1.92 | 12   | 1.16   | 30    | 2.23   |   |
| 1061 | Ranbp17    | 1.92 | 30   | 0.52   | 57    | 0.99   |   |
| 1062 | Rcor3      | 1.92 | 75   | 5.51   | 170   | 10.59  |   |
| 1063 | Ap3s1      | 1.92 | 47   | 8.45   | 111   | 16.22  |   |
| 1064 | Adgrl3     | 1.92 | 310  | 9.3    | 900   | 17.81  |   |
| 1065 | Fam204a    | 1.92 | 20   | 2.74   | 50    | 5.25   |   |
| 1066 | Col3a1     | 1.91 | 466  | 35.86  | 1210  | 68.68  |   |
| 1067 | Rpusd4     | 1.91 | 29   | 3.62   | 60    | 6.92   |   |

Supplemental Table 3  
 FSH + Ad-E versus FSH + Ad-FOXO1(A3), 24 hours

|      | A              | B    | C   | D     | E    | F     | G |
|------|----------------|------|-----|-------|------|-------|---|
| 1068 | Tmem123        | 1.91 | 397 | 45.61 | 1021 | 87.08 |   |
| 1069 | Lrch1          | 1.91 | 136 | 7.71  | 356  | 14.71 |   |
| 1070 | Dusp16         | 1.91 | 53  | 6.08  | 130  | 11.6  |   |
| 1071 | Wwc1           | 1.91 | 42  | 1.97  | 98   | 3.75  |   |
| 1072 | Ank2           | 1.91 | 38  | 0.58  | 84   | 1.11  |   |
| 1073 | Kctd10         | 1.9  | 119 | 12.74 | 290  | 24.26 |   |
| 1074 | Zfp57          | 1.9  | 34  | 6.3   | 94   | 11.99 |   |
| 1075 | Itch           | 1.9  | 139 | 10.42 | 293  | 19.8  |   |
| 1076 | Kdm7a          | 1.9  | 65  | 6.67  | 149  | 12.68 |   |
| 1077 | Mospd2         | 1.9  | 49  | 2.89  | 112  | 5.49  |   |
| 1078 | Pgm2l1         | 1.9  | 95  | 5.37  | 273  | 10.2  |   |
| 1079 | Slc22a15       | 1.9  | 22  | 1.39  | 65   | 2.64  |   |
| 1080 | Ccdc107        | 1.9  | 19  | 9.94  | 43   | 18.87 |   |
| 1081 | Fhl2           | 1.89 | 49  | 10.24 | 134  | 19.39 |   |
| 1082 | Msrbb3         | 1.89 | 118 | 7.43  | 261  | 14.07 |   |
| 1083 | Atoh8          | 1.89 | 64  | 7.77  | 170  | 14.7  |   |
| 1084 | Nhs            | 1.89 | 20  | 1.07  | 50   | 2.03  |   |
| 1085 | Cnr1           | 1.89 | 23  | 1.26  | 67   | 2.38  |   |
| 1086 | Clec2g         | 1.89 | 134 | 20.86 | 338  | 39.4  |   |
| 1087 | Kif23          | 1.89 | 155 | 13.76 | 393  | 25.96 |   |
| 1088 | Plekhh2        | 1.89 | 39  | 1.69  | 91   | 3.19  |   |
| 1089 | Kalrn          | 1.88 | 87  | 0.97  | 144  | 1.82  |   |
| 1090 | RGD1566359     | 1.88 | 27  | 17.15 | 67   | 32.29 |   |
| 1091 | Wwc2           | 1.88 | 446 | 17.25 | 1161 | 32.46 |   |
| 1092 | Crebrf         | 1.87 | 120 | 4.92  | 289  | 9.23  |   |
| 1093 | AC126537.1     | 1.87 | 9   | 2.61  | 15   | 4.88  |   |
| 1094 | AC131360.1     | 1.87 | 5   | 0.78  | 9    | 1.46  |   |
| 1095 | Cabyr          | 1.87 | 14  | 0.35  | 15   | 0.65  |   |
| 1096 | Helq           | 1.87 | 31  | 1.31  | 69   | 2.45  |   |
| 1097 | Ints1_1        | 1.87 | 0   | 1.15  | 0    | 2.15  |   |
| 1098 | Nox4           | 1.87 | 20  | 1.35  | 80   | 2.53  |   |
| 1099 | Olr621_1       | 1.87 | 2   | 0.8   | 3    | 1.49  |   |
| 1100 | Phf11c         | 1.87 | 3   | 0.72  | 8    | 1.34  |   |
| 1101 | AABR07013776.1 | 1.87 | 2   | 1.63  | 5    | 3.05  |   |
| 1102 | AABR07059380.1 | 1.87 | 2   | 0.15  | 5    | 0.28  |   |
| 1103 | AC114343.1     | 1.87 | 0   | 0.38  | 0    | 0.71  |   |
| 1104 | AC119011.1     | 1.87 | 1   | 0.47  | 3    | 0.87  |   |
| 1105 | AC120727.2     | 1.87 | 0   | 5.97  | 0    | 11.17 |   |
| 1106 | Ap1ar          | 1.87 | 39  | 7.01  | 87   | 13.1  |   |
| 1107 | Avil           | 1.87 | 29  | 0.24  | 43   | 0.45  |   |
| 1108 | Bag3           | 1.87 | 119 | 16.72 | 298  | 31.26 |   |
| 1109 | Cd44           | 1.87 | 7   | 0.36  | 11   | 0.68  |   |
| 1110 | Cyp2c13_2      | 1.87 | 7   | 1.68  | 12   | 3.15  |   |
| 1111 | Dcbld2         | 1.87 | 158 | 19.15 | 433  | 35.78 |   |
| 1112 | Dnajc24        | 1.87 | 14  | 1.83  | 27   | 3.41  |   |
| 1113 | Efna5          | 1.87 | 21  | 3.26  | 79   | 6.1   |   |
| 1114 | Ehhadh         | 1.87 | 4   | 0.23  | 7    | 0.44  |   |
| 1115 | Entpd7_1       | 1.87 | 0   | 0.71  | 0    | 1.32  |   |
| 1116 | Fam174b        | 1.87 | 6   | 0.44  | 10   | 0.82  |   |
| 1117 | Gas1           | 1.87 | 2   | 0.63  | 5    | 1.17  |   |
| 1118 | Hfe            | 1.87 | 5   | 0.61  | 13   | 1.14  |   |
| 1119 | Iqub           | 1.87 | 5   | 0.24  | 14   | 0.45  |   |
| 1120 | Ispd           | 1.87 | 40  | 0.74  | 49   | 1.39  |   |
| 1121 | Klf13          | 1.87 | 22  | 3.61  | 39   | 6.74  |   |

Supplemental Table 3  
 FSH + Ad-E versus FSH + Ad-FOXO1(A3), 24 hours

|      | A              | B    | C   | D     | E   | F     | G |
|------|----------------|------|-----|-------|-----|-------|---|
| 1122 | Lgi2           | 1.87 | 3   | 0.12  | 5   | 0.23  |   |
| 1123 | Llph           | 1.87 | 1   | 1.9   | 2   | 3.55  |   |
| 1124 | LOC685963      | 1.87 | 0   | 3.4   | 0   | 6.35  |   |
| 1125 | Mcur1          | 1.87 | 11  | 2.15  | 23  | 4.02  |   |
| 1126 | Nckap5         | 1.87 | 32  | 0.12  | 32  | 0.22  |   |
| 1127 | Nek11          | 1.87 | 17  | 0.55  | 18  | 1.02  |   |
| 1128 | Pde4dip        | 1.87 | 155 | 1.98  | 273 | 3.71  |   |
| 1129 | Plcg2          | 1.87 | 7   | 0.19  | 11  | 0.36  |   |
| 1130 | Plekhg6        | 1.87 | 6   | 0.31  | 8   | 0.58  |   |
| 1131 | Pmel           | 1.87 | 5   | 0.3   | 7   | 0.56  |   |
| 1132 | Rab19          | 1.87 | 3   | 0.34  | 10  | 0.64  |   |
| 1133 | RGD1564698     | 1.87 | 2   | 1.3   | 2   | 2.43  |   |
| 1134 | Rn60_14_0447.1 | 1.87 | 0   | 0.81  | 0   | 1.51  |   |
| 1135 | Rpl38_1        | 1.87 | 0   | 3.4   | 0   | 6.35  |   |
| 1136 | Rpl39_4        | 1.87 | 0   | 9.28  | 0   | 17.35 |   |
| 1137 | Slfn1          | 1.87 | 3   | 0.42  | 19  | 0.78  |   |
| 1138 | Zfp78          | 1.87 | 2   | 0.47  | 6   | 0.88  |   |
| 1139 | Zfyve28        | 1.87 | 7   | 0.18  | 16  | 0.34  |   |
| 1140 | Znhit3         | 1.87 | 7   | 3.18  | 15  | 5.94  |   |
| 1141 | AABR07001210.1 | 1.87 | 3   | 0.27  | 8   | 0.51  |   |
| 1142 | AABR07004112.1 | 1.87 | 0   | 0.29  | 0   | 0.54  |   |
| 1143 | AABR07068587.1 | 1.87 | 2   | 2.01  | 5   | 3.76  |   |
| 1144 | AC118490.1     | 1.87 | 1   | 0.66  | 1   | 1.23  |   |
| 1145 | Casp4          | 1.87 | 3   | 0.59  | 7   | 1.11  |   |
| 1146 | Cnga2_2        | 1.87 | 2   | 0.21  | 4   | 0.39  |   |
| 1147 | Exph5          | 1.87 | 22  | 0.54  | 50  | 1     |   |
| 1148 | LOC100910735   | 1.87 | 0   | 0.44  | 0   | 0.82  |   |
| 1149 | Lyar           | 1.87 | 44  | 4.47  | 82  | 8.36  |   |
| 1150 | Mroh8          | 1.87 | 8   | 0.22  | 18  | 0.4   |   |
| 1151 | Mustn1         | 1.87 | 2   | 0.66  | 5   | 1.24  |   |
| 1152 | Nbeal1         | 1.87 | 88  | 2.42  | 220 | 4.53  |   |
| 1153 | Nrxn1          | 1.87 | 18  | 0.52  | 25  | 0.96  |   |
| 1154 | Pard3b         | 1.87 | 125 | 2.41  | 261 | 4.5   |   |
| 1155 | Plet1          | 1.87 | 4   | 0.96  | 10  | 1.79  |   |
| 1156 | RGD1307621     | 1.87 | 13  | 2.29  | 27  | 4.28  |   |
| 1157 | RGD1559962     | 1.87 | 0   | 1.15  | 0   | 2.15  |   |
| 1158 | Rwdd3          | 1.87 | 15  | 1.37  | 23  | 2.56  |   |
| 1159 | SNORD49_1      | 1.87 | 2   | 10.2  | 5   | 19.06 |   |
| 1160 | Vegfc          | 1.87 | 58  | 7.14  | 145 | 13.34 |   |
| 1161 | Aebp2          | 1.86 | 168 | 8.56  | 314 | 15.92 |   |
| 1162 | Slc12a2        | 1.86 | 234 | 11.14 | 537 | 20.68 |   |
| 1163 | Rin2           | 1.85 | 224 | 10.54 | 478 | 19.53 |   |
| 1164 | Arap2          | 1.85 | 35  | 1.04  | 78  | 1.93  |   |
| 1165 | Ppap2b         | 1.85 | 81  | 7.41  | 183 | 13.71 |   |
| 1166 | Cdh11          | 1.85 | 74  | 4.27  | 200 | 7.9   |   |
| 1167 | Fam69a         | 1.85 | 29  | 3.08  | 65  | 5.7   |   |
| 1168 | Gnaq           | 1.85 | 125 | 14.24 | 244 | 26.31 |   |
| 1169 | Sptb           | 1.85 | 32  | 0.84  | 64  | 1.55  |   |
| 1170 | Tbcb           | 1.85 | 0   | 11.37 | 2   | 21    |   |
| 1171 | Epb4.1         | 1.85 | 149 | 8.71  | 344 | 16.07 |   |
| 1172 | Crocc          | 1.84 | 33  | 0.76  | 46  | 1.39  |   |
| 1173 | Traf5          | 1.84 | 22  | 3.24  | 61  | 5.97  |   |
| 1174 | Sema4g         | 1.84 | 13  | 1.09  | 39  | 2     |   |
| 1175 | Sclt1          | 1.84 | 117 | 5.71  | 301 | 10.51 |   |

Supplemental Table 3  
 FSH + Ad-E versus FSH + Ad-FOXO1(A3), 24 hours

|      | A              | B    | C    | D      | E    | F      | G |
|------|----------------|------|------|--------|------|--------|---|
| 1176 | Tmtc1          | 1.84 | 28   | 1.53   | 82   | 2.82   |   |
| 1177 | Wdr47          | 1.84 | 54   | 3.44   | 139  | 6.34   |   |
| 1178 | Heatr3         | 1.84 | 55   | 3.96   | 127  | 7.27   |   |
| 1179 | Gnb4           | 1.84 | 88   | 18.7   | 220  | 34.37  |   |
| 1180 | Hivep2         | 1.84 | 26   | 0.92   | 61   | 1.7    |   |
| 1181 | Tln1           | 1.84 | 1178 | 48.36  | 2884 | 88.84  |   |
| 1182 | AY172581.15    | 1.84 | 22   | 115.44 | 54   | 211.85 |   |
| 1183 | Steap3         | 1.84 | 13   | 1.33   | 31   | 2.44   |   |
| 1184 | Rn60_11_0375.8 | 1.84 | 18   | 9.66   | 45   | 17.72  |   |
| 1185 | Gabpb2         | 1.84 | 16   | 2.71   | 39   | 4.97   |   |
| 1186 | Gopc           | 1.83 | 71   | 6.23   | 176  | 11.42  |   |
| 1187 | Rab9a          | 1.83 | 36   | 5.69   | 73   | 10.43  |   |
| 1188 | Prr36          | 1.83 | 32   | 3.24   | 77   | 5.93   |   |
| 1189 | LOC100911867   | 1.83 | 107  | 6.94   | 265  | 12.71  |   |
| 1190 | Myo10          | 1.83 | 502  | 21.21  | 1203 | 38.82  |   |
| 1191 | Spata5l1       | 1.83 | 15   | 1.3    | 40   | 2.38   |   |
| 1192 | AABR07050417.1 | 1.83 | 22   | 2.25   | 50   | 4.11   |   |
| 1193 | Hook3          | 1.83 | 294  | 4.59   | 580  | 8.39   |   |
| 1194 | Kifc2          | 1.83 | 10   | 0.94   | 22   | 1.72   |   |
| 1195 | Sdhaf4         | 1.83 | 16   | 10.34  | 36   | 18.91  |   |
| 1196 | Rasa3          | 1.83 | 79   | 6.63   | 201  | 12.1   |   |
| 1197 | Lrfn4          | 1.82 | 7    | 3.82   | 19   | 6.97   |   |
| 1198 | Sdr39u1        | 1.82 | 42   | 6.18   | 87   | 11.27  |   |
| 1199 | Cast           | 1.82 | 589  | 15.91  | 1029 | 29.01  |   |
| 1200 | Fzd7           | 1.82 | 16   | 2.05   | 39   | 3.74   |   |
| 1201 | Cchcr1         | 1.82 | 43   | 4.87   | 85   | 8.87   |   |
| 1202 | Fgd4           | 1.82 | 40   | 1.19   | 92   | 2.17   |   |
| 1203 | Akap13         | 1.82 | 455  | 10.78  | 1069 | 19.61  |   |
| 1204 | Clic5          | 1.82 | 18   | 0.53   | 32   | 0.96   |   |
| 1205 | Ccdc66         | 1.82 | 67   | 3.48   | 131  | 6.32   |   |
| 1206 | Dusp10         | 1.82 | 19   | 1.87   | 48   | 3.4    |   |
| 1207 | Esyt2          | 1.82 | 115  | 11.98  | 309  | 21.76  |   |
| 1208 | Laptm5         | 1.82 | 9    | 1.08   | 19   | 1.96   |   |
| 1209 | LOC100912537   | 1.82 | 0    | 1.42   | 0    | 2.58   |   |
| 1210 | Metazoa_SRP_22 | 1.82 | 2    | 33.68  | 11   | 61.15  |   |
| 1211 | Pltp           | 1.82 | 10   | 1.25   | 19   | 2.27   |   |
| 1212 | Arhgap22       | 1.82 | 15   | 0.88   | 36   | 1.6    |   |
| 1213 | Hspa4l         | 1.82 | 9    | 0.61   | 23   | 1.11   |   |
| 1214 | LOC100912399_2 | 1.82 | 0    | 0.64   | 0    | 1.16   |   |
| 1215 | lfrd1          | 1.81 | 135  | 17.99  | 321  | 32.65  |   |
| 1216 | Mef2c          | 1.81 | 72   | 3.03   | 191  | 5.5    |   |
| 1217 | SNORD22_1      | 1.81 | 32   | 94.83  | 79   | 171.87 |   |
| 1218 | Plxdc2         | 1.81 | 1127 | 99.68  | 3019 | 180.53 |   |
| 1219 | Lifr           | 1.81 | 118  | 6.85   | 283  | 12.41  |   |
| 1220 | AABR07002624.1 | 1.81 | 0    | 73.57  | 0    | 133.18 |   |
| 1221 | Zfp397         | 1.81 | 22   | 3.34   | 52   | 6.04   |   |
| 1222 | Mtus1          | 1.81 | 92   | 4.04   | 247  | 7.32   |   |
| 1223 | Rnf19a         | 1.81 | 299  | 22.05  | 725  | 39.82  |   |
| 1224 | Tgds           | 1.81 | 83   | 7.62   | 136  | 13.76  |   |
| 1225 | Ccdc109b       | 1.8  | 172  | 42.4   | 463  | 76.49  |   |
| 1226 | Zfp90          | 1.8  | 32   | 2.74   | 60   | 4.94   |   |
| 1227 | Chrdl1         | 1.8  | 619  | 24.07  | 1684 | 43.31  |   |
| 1228 | Zfp105         | 1.8  | 57   | 5.78   | 119  | 10.4   |   |
| 1229 | Lgals3         | 1.8  | 41   | 10.67  | 87   | 19.19  |   |

Supplemental Table 3  
 FSH + Ad-E versus FSH + Ad-FOXO1(A3), 24 hours

|      | A              | B    | C    | D      | E    | F      | G |
|------|----------------|------|------|--------|------|--------|---|
| 1230 | Gng12          | 1.8  | 95   | 21.51  | 194  | 38.67  |   |
| 1231 | Sepp1          | 1.8  | 56   | 30.92  | 138  | 55.56  |   |
| 1232 | Myl12a         | 1.8  | 1835 | 736.78 | 4607 | 1322.9 |   |
| 1233 | Acot13         | 1.79 | 11   | 2.37   | 24   | 4.26   |   |
| 1234 | Cav2           | 1.79 | 6    | 0.73   | 14   | 1.31   |   |
| 1235 | Ccdc57         | 1.79 | 57   | 0.59   | 84   | 1.06   |   |
| 1236 | Exnef          | 1.79 | 27   | 0.58   | 35   | 1.05   |   |
| 1237 | Fhl4           | 1.79 | 6    | 0.94   | 13   | 1.68   |   |
| 1238 | LOC684270      | 1.79 | 22   | 1.96   | 38   | 3.52   |   |
| 1239 | Ppm1m          | 1.79 | 18   | 2.24   | 40   | 4.01   |   |
| 1240 | Rbm12_2        | 1.79 | 0    | 0.58   | 0    | 1.05   |   |
| 1241 | Y_RNA_8        | 1.79 | 10   | 35.5   | 24   | 63.69  |   |
| 1242 | Alg6           | 1.79 | 31   | 2.38   | 43   | 4.26   |   |
| 1243 | Arhgap42       | 1.79 | 117  | 5.96   | 271  | 10.69  |   |
| 1244 | Atg16l2        | 1.79 | 35   | 3.45   | 69   | 6.2    |   |
| 1245 | Btbd3          | 1.79 | 45   | 6.79   | 110  | 12.19  |   |
| 1246 | Ccdc138        | 1.79 | 13   | 0.88   | 25   | 1.59   |   |
| 1247 | Lnpep          | 1.79 | 0    | 1.84   | 1    | 3.31   |   |
| 1248 | Slc44a3        | 1.79 | 10   | 1      | 16   | 1.79   |   |
| 1249 | Vom2r44        | 1.79 | 10   | 0.26   | 14   | 0.47   |   |
| 1250 | Wbp4           | 1.79 | 42   | 3.52   | 60   | 6.31   |   |
| 1251 | Acrbp          | 1.79 | 8    | 1.44   | 13   | 2.58   |   |
| 1252 | Ccdc171        | 1.79 | 18   | 0.41   | 29   | 0.73   |   |
| 1253 | Pcnp           | 1.79 | 83   | 31.77  | 168  | 56.92  |   |
| 1254 | Arhgap29       | 1.79 | 665  | 37.89  | 1620 | 67.83  |   |
| 1255 | Klhl28         | 1.79 | 39   | 3.34   | 91   | 5.97   |   |
| 1256 | LOC100360449   | 1.79 | 0    | 84.42  | 0    | 151.01 |   |
| 1257 | Syap1          | 1.79 | 148  | 16.27  | 321  | 29.1   |   |
| 1258 | Rasa2          | 1.79 | 74   | 2.55   | 169  | 4.56   |   |
| 1259 | Cd24           | 1.79 | 28   | 7.06   | 65   | 12.61  |   |
| 1260 | Cep97          | 1.79 | 25   | 2.02   | 67   | 3.61   |   |
| 1261 | Cnn3           | 1.78 | 461  | 75.14  | 1094 | 134.12 |   |
| 1262 | AABR07002774.1 | 1.78 | 16   | 1.77   | 33   | 3.15   |   |
| 1263 | Osbpl3         | 1.78 | 32   | 1.38   | 85   | 2.46   |   |
| 1264 | Synpo2         | 1.78 | 38   | 1.14   | 64   | 2.02   |   |
| 1265 | Bicc1          | 1.78 | 322  | 20.18  | 794  | 35.96  |   |
| 1266 | AABR07047262.1 | 1.78 | 5    | 3.99   | 18   | 7.1    |   |
| 1267 | Wipf2          | 1.78 | 51   | 5.48   | 97   | 9.75   |   |
| 1268 | Mt-nd6         | 1.78 | 395  | 281.84 | 943  | 501.22 |   |
| 1269 | RGD1562136     | 1.78 | 85   | 9.81   | 193  | 17.45  |   |
| 1270 | Dsp            | 1.78 | 49   | 1.82   | 117  | 3.23   |   |
| 1271 | Hrct1          | 1.78 | 8    | 9.02   | 19   | 16.02  |   |
| 1272 | Otud3          | 1.78 | 23   | 1.52   | 43   | 2.7    |   |
| 1273 | LOC100364500   | 1.78 | 5    | 2.51   | 12   | 4.46   |   |
| 1274 | Parp16         | 1.78 | 17   | 1.87   | 33   | 3.32   |   |
| 1275 | Zfp518a        | 1.78 | 39   | 1.71   | 80   | 3.03   |   |
| 1276 | LOC100911093   | 1.77 | 45   | 8.3    | 104  | 14.73  |   |
| 1277 | Tcp1111        | 1.77 | 64   | 6.78   | 135  | 12.03  |   |
| 1278 | Fads3          | 1.77 | 85   | 17.58  | 196  | 31.16  |   |
| 1279 | Dab2           | 1.77 | 252  | 26.9   | 639  | 47.69  |   |
| 1280 | Rgl1           | 1.77 | 226  | 12.14  | 537  | 21.5   |   |
| 1281 | Nol10          | 1.77 | 86   | 5.81   | 164  | 10.3   |   |
| 1282 | Mtss1l         | 1.77 | 96   | 8.82   | 253  | 15.63  |   |
| 1283 | AABR07054370.1 | 1.77 | 84   | 41.32  | 193  | 73.16  |   |



Supplemental Table 3  
 FSH + Ad-E versus FSH + Ad-FOXO1(A3), 24 hours

|      | A              | B    | C   | D     | E   | F     | G |
|------|----------------|------|-----|-------|-----|-------|---|
| 1284 | Paqr8          | 1.77 | 21  | 4.3   | 52  | 7.62  |   |
| 1285 | Gspt1          | 1.77 | 380 | 20.92 | 873 | 37.05 |   |
| 1286 | Nit2           | 1.77 | 82  | 18.31 | 178 | 32.39 |   |
| 1287 | Arhgef25       | 1.77 | 51  | 7.57  | 127 | 13.38 |   |
| 1288 | Pawr           | 1.77 | 308 | 28.99 | 798 | 51.16 |   |
| 1289 | Tulp4          | 1.76 | 431 | 20.55 | 951 | 36.27 |   |
| 1290 | Arhgap17       | 1.76 | 306 | 20.16 | 774 | 35.54 |   |
| 1291 | Aff3           | 1.76 | 220 | 4.96  | 476 | 8.75  |   |
| 1292 | Hnrnp3         | 1.76 | 127 | 5.82  | 221 | 10.26 |   |
| 1293 | Lpar4          | 1.76 | 16  | 1.22  | 35  | 2.14  |   |
| 1294 | Samhd1         | 1.76 | 16  | 1.73  | 36  | 3.05  |   |
| 1295 | Ndr4           | 1.76 | 85  | 7.3   | 181 | 12.86 |   |
| 1296 | AC120246.2     | 1.76 | 22  | 4.19  | 46  | 7.37  |   |
| 1297 | Micall1        | 1.76 | 17  | 0.88  | 40  | 1.55  |   |
| 1298 | RGD1311747     | 1.76 | 34  | 5.4   | 73  | 9.49  |   |
| 1299 | AC118147.2     | 1.76 | 30  | 2.02  | 75  | 3.55  |   |
| 1300 | Nek1           | 1.75 | 57  | 2.33  | 107 | 4.08  |   |
| 1301 | RGD1309079     | 1.75 | 225 | 14.27 | 524 | 25    |   |
| 1302 | Pdlim7         | 1.75 | 92  | 15.62 | 211 | 27.36 |   |
| 1303 | Rai14          | 1.75 | 226 | 14.82 | 543 | 25.94 |   |
| 1304 | Msn            | 1.75 | 327 | 23.61 | 759 | 41.29 |   |
| 1305 | Nrg1           | 1.75 | 129 | 3.63  | 262 | 6.34  |   |
| 1306 | Aktip          | 1.75 | 72  | 14.45 | 179 | 25.26 |   |
| 1307 | Fmo4           | 1.74 | 5   | 0.46  | 14  | 0.8   |   |
| 1308 | Abat           | 1.74 | 14  | 0.41  | 11  | 0.72  |   |
| 1309 | Adhfe1         | 1.74 | 14  | 0.55  | 9   | 0.96  |   |
| 1310 | Adra1b         | 1.74 | 7   | 0.44  | 16  | 0.76  |   |
| 1311 | Atf3           | 1.74 | 6   | 0.37  | 10  | 0.65  |   |
| 1312 | Esrp1          | 1.74 | 3   | 0.28  | 9   | 0.49  |   |
| 1313 | Gpr37          | 1.74 | 4   | 0.34  | 8   | 0.59  |   |
| 1314 | Grip1          | 1.74 | 7   | 0.24  | 27  | 0.42  |   |
| 1315 | Kcna4          | 1.74 | 3   | 0.35  | 7   | 0.61  |   |
| 1316 | Kcnj3          | 1.74 | 10  | 0.59  | 9   | 1.04  |   |
| 1317 | Kctd20         | 1.74 | 68  | 14.69 | 140 | 25.63 |   |
| 1318 | Klhl34         | 1.74 | 3   | 0.56  | 7   | 0.98  |   |
| 1319 | LOC100361061   | 1.74 | 3   | 7.17  | 5   | 12.51 |   |
| 1320 | LOC100911545   | 1.74 | 0   | 0.25  | 0   | 0.43  |   |
| 1321 | Mageb7         | 1.74 | 2   | 1.01  | 4   | 1.76  |   |
| 1322 | Mfsd8          | 1.74 | 36  | 1.93  | 61  | 3.36  |   |
| 1323 | Ngrn           | 1.74 | 45  | 6.52  | 81  | 11.38 |   |
| 1324 | Rel            | 1.74 | 4   | 0.61  | 10  | 1.07  |   |
| 1325 | Rn60_4_1636.2  | 1.74 | 3   | 1.23  | 7   | 2.14  |   |
| 1326 | Uchl3          | 1.74 | 1   | 1.57  | 0   | 2.73  |   |
| 1327 | Zfp2           | 1.74 | 14  | 1.57  | 27  | 2.74  |   |
| 1328 | Zfp341         | 1.74 | 11  | 1.69  | 20  | 2.95  |   |
| 1329 | AABR07036732.1 | 1.74 | 12  | 0.56  | 26  | 0.97  |   |
| 1330 | Arhgef12       | 1.74 | 279 | 13.61 | 609 | 23.74 |   |
| 1331 | Birc3          | 1.74 | 10  | 0.96  | 17  | 1.67  |   |
| 1332 | Btbd16         | 1.74 | 9   | 0.57  | 13  | 1     |   |
| 1333 | Etv5           | 1.74 | 13  | 1.11  | 36  | 1.94  |   |
| 1334 | Glipr1         | 1.74 | 7   | 2.14  | 29  | 3.74  |   |
| 1335 | Homer1         | 1.74 | 35  | 1.49  | 59  | 2.59  |   |
| 1336 | Hykk           | 1.74 | 8   | 0.43  | 12  | 0.76  |   |
| 1337 | Prkag3         | 1.74 | 3   | 0.4   | 11  | 0.69  |   |

Supplemental Table 3  
 FSH + Ad-E versus FSH + Ad-FOXO1(A3), 24 hours

|      | A              | B    | C    | D      | E    | F      | G |
|------|----------------|------|------|--------|------|--------|---|
| 1338 | RGD1564036     | 1.74 | 31   | 1.72   | 40   | 2.99   |   |
| 1339 | RT1-T24-4      | 1.74 | 4    | 1.99   | 9    | 3.47   |   |
| 1340 | Srf            | 1.74 | 128  | 10.32  | 301  | 18.01  |   |
| 1341 | Tceanc         | 1.74 | 3    | 1.01   | 7    | 1.76   |   |
| 1342 | Zfp536         | 1.74 | 13   | 0.5    | 18   | 0.88   |   |
| 1343 | Myh10          | 1.74 | 3284 | 148.91 | 7628 | 259.3  |   |
| 1344 | Ccpg1          | 1.74 | 174  | 15.1   | 397  | 26.24  |   |
| 1345 | Slc25a24       | 1.74 | 116  | 9.81   | 263  | 17.03  |   |
| 1346 | Amotl1         | 1.74 | 58   | 3.49   | 104  | 6.06   |   |
| 1347 | Mprp           | 1.73 | 806  | 31.29  | 1856 | 54.23  |   |
| 1348 | Tcp11l2        | 1.73 | 68   | 9.6    | 168  | 16.63  |   |
| 1349 | Slit2          | 1.73 | 102  | 3.73   | 271  | 6.46   |   |
| 1350 | Mphosph10      | 1.73 | 45   | 6.25   | 109  | 10.81  |   |
| 1351 | Fgl2           | 1.73 | 3    | 1.87   | 1    | 3.23   |   |
| 1352 | RGD1311863     | 1.73 | 42   | 5.06   | 75   | 8.76   |   |
| 1353 | Plekhh1        | 1.73 | 69   | 2.91   | 145  | 5.03   |   |
| 1354 | Pcdh7          | 1.73 | 205  | 18.61  | 468  | 32.18  |   |
| 1355 | MGC112715      | 1.73 | 7    | 3.1    | 10   | 5.36   |   |
| 1356 | Ppip5k1        | 1.73 | 266  | 5.86   | 485  | 10.12  |   |
| 1357 | Slfn13         | 1.73 | 294  | 17.41  | 692  | 30.04  |   |
| 1358 | Zfp560         | 1.73 | 14   | 1.47   | 29   | 2.53   |   |
| 1359 | AABR07043421.1 | 1.73 | 5    | 3.39   | 9    | 5.86   |   |
| 1360 | Tmem170b       | 1.73 | 32   | 5      | 78   | 8.63   |   |
| 1361 | RGD1308139     | 1.72 | 29   | 4.53   | 48   | 7.8    |   |
| 1362 | Basp1          | 1.72 | 73   | 12.77  | 159  | 22.01  |   |
| 1363 | LOC100911874_2 | 1.72 | 39   | 7.38   | 103  | 12.71  |   |
| 1364 | Cript          | 1.72 | 33   | 8.36   | 82   | 14.39  |   |
| 1365 | Macf1          | 1.72 | 1176 | 13.14  | 2689 | 22.61  |   |
| 1366 | AABR07003537.1 | 1.72 | 7    | 5.92   | 19   | 10.17  |   |
| 1367 | Ccdc39         | 1.72 | 44   | 0.89   | 101  | 1.53   |   |
| 1368 | Fnip1          | 1.72 | 65   | 4.22   | 149  | 7.26   |   |
| 1369 | Ier5           | 1.72 | 31   | 7.94   | 72   | 13.65  |   |
| 1370 | Adm            | 1.72 | 10   | 2.61   | 23   | 4.49   |   |
| 1371 | Cetn3          | 1.72 | 0    | 3.07   | 2    | 5.28   |   |
| 1372 | Dkk4           | 1.72 | 29   | 2.43   | 44   | 4.18   |   |
| 1373 | LOC690871      | 1.72 | 16   | 7.99   | 26   | 13.74  |   |
| 1374 | Tead3          | 1.72 | 35   | 2.47   | 97   | 4.24   |   |
| 1375 | Tns1           | 1.72 | 66   | 2.78   | 124  | 4.78   |   |
| 1376 | Prex2          | 1.72 | 251  | 9.6    | 593  | 16.48  |   |
| 1377 | Rufy1          | 1.72 | 91   | 8.28   | 220  | 14.21  |   |
| 1378 | Cdc27          | 1.72 | 195  | 16.67  | 425  | 28.6   |   |
| 1379 | Chic2          | 1.72 | 55   | 5.63   | 105  | 9.66   |   |
| 1380 | RGD1563348     | 1.72 | 24   | 9.41   | 48   | 16.14  |   |
| 1381 | Tead1          | 1.71 | 177  | 11.51  | 414  | 19.74  |   |
| 1382 | Wwc3           | 1.71 | 114  | 6.27   | 271  | 10.75  |   |
| 1383 | Arhgap6        | 1.71 | 204  | 24.89  | 480  | 42.64  |   |
| 1384 | Cadps2         | 1.71 | 99   | 3.05   | 194  | 5.23   |   |
| 1385 | Sri            | 1.71 | 86   | 32.49  | 210  | 55.61  |   |
| 1386 | S100a11        | 1.71 | 188  | 256.01 | 415  | 437.48 |   |
| 1387 | Arid4b         | 1.71 | 0    | 0.69   | 0    | 1.18   |   |
| 1388 | Top1mt         | 1.71 | 29   | 3.22   | 58   | 5.51   |   |
| 1389 | Ybey           | 1.71 | 10   | 0.57   | 16   | 0.98   |   |
| 1390 | Cys1           | 1.71 | 12   | 0.86   | 18   | 1.46   |   |
| 1391 | Dclk1          | 1.71 | 83   | 1.78   | 182  | 3.05   |   |

Supplemental Table 3  
 FSH + Ad-E versus FSH + Ad-FOXO1(A3), 24 hours

|      | A              | B    | C   | D     | E    | F      | G |
|------|----------------|------|-----|-------|------|--------|---|
| 1392 | Mtrf11         | 1.71 | 24  | 2.07  | 26   | 3.54   |   |
| 1393 | Pcsk6          | 1.71 | 30  | 1.83  | 52   | 3.13   |   |
| 1394 | Plcx2          | 1.71 | 7   | 0.32  | 21   | 0.55   |   |
| 1395 | Sema3d         | 1.71 | 15  | 0.51  | 22   | 0.87   |   |
| 1396 | Snapc2         | 1.71 | 42  | 8.92  | 100  | 15.24  |   |
| 1397 | Sp140          | 1.71 | 69  | 4.68  | 162  | 8      |   |
| 1398 | Mbnl1          | 1.71 | 183 | 22.59 | 408  | 38.58  |   |
| 1399 | Rsb1           | 1.71 | 64  | 2.1   | 121  | 3.57   |   |
| 1400 | Nagk           | 1.71 | 44  | 7.79  | 109  | 13.28  |   |
| 1401 | Calcoco1       | 1.71 | 0   | 10.53 | 0    | 17.96  |   |
| 1402 | Nupr1_1        | 1.7  | 0   | 28.29 | 0    | 48.22  |   |
| 1403 | S100a6         | 1.7  | 70  | 52.16 | 155  | 88.89  |   |
| 1404 | Agtbbp1        | 1.7  | 78  | 3.39  | 151  | 5.78   |   |
| 1405 | Nsun6          | 1.7  | 38  | 3.2   | 61   | 5.45   |   |
| 1406 | Phlda1         | 1.7  | 140 | 27.39 | 314  | 46.63  |   |
| 1407 | Ctnna3_2       | 1.7  | 58  | 19.06 | 124  | 32.44  |   |
| 1408 | Lrrn3          | 1.7  | 788 | 86.21 | 1828 | 146.61 |   |
| 1409 | AABR07001910.1 | 1.7  | 11  | 1.51  | 24   | 2.57   |   |
| 1410 | AABR07057519.1 | 1.7  | 12  | 1.27  | 25   | 2.16   |   |
| 1411 | AABR07068341.1 | 1.7  | 11  | 1.75  | 30   | 2.97   |   |
| 1412 | Hnrnpa3_1      | 1.7  | 38  | 48.91 | 68   | 83.11  |   |
| 1413 | Mtfr1          | 1.7  | 11  | 3.74  | 24   | 6.35   |   |
| 1414 | Ndst2          | 1.7  | 0   | 1.16  | 0    | 1.98   |   |
| 1415 | Serpinb6b      | 1.7  | 11  | 3.52  | 27   | 5.98   |   |
| 1416 | AABR07015080.2 | 1.7  | 0   | 9.69  | 0    | 16.47  |   |
| 1417 | Elk3           | 1.7  | 14  | 1.04  | 31   | 1.77   |   |
| 1418 | Tipin1         | 1.7  | 21  | 7.99  | 40   | 13.56  |   |
| 1419 | Alcam          | 1.7  | 126 | 10.86 | 305  | 18.4   |   |
| 1420 | Sh3kbp1        | 1.69 | 55  | 3.07  | 94   | 5.2    |   |
| 1421 | Znhit1         | 1.69 | 22  | 4.4   | 35   | 7.46   |   |
| 1422 | Epb41l2        | 1.69 | 164 | 12.81 | 356  | 21.68  |   |
| 1423 | Rnf103         | 1.69 | 84  | 5.94  | 173  | 10.05  |   |
| 1424 | Fam49a         | 1.69 | 64  | 3.17  | 145  | 5.36   |   |
| 1425 | Zfp704         | 1.69 | 75  | 4.91  | 164  | 8.3    |   |
| 1426 | Gab2           | 1.69 | 263 | 19.25 | 559  | 32.47  |   |
| 1427 | Cux1           | 1.69 | 317 | 14.77 | 670  | 24.9   |   |
| 1428 | Ptpn13         | 1.69 | 180 | 6.26  | 391  | 10.55  |   |
| 1429 | Ppfibp1        | 1.68 | 742 | 42.07 | 1686 | 70.88  |   |
| 1430 | Birc2          | 1.68 | 82  | 8.79  | 205  | 14.81  |   |
| 1431 | Adamts1        | 1.68 | 19  | 0.19  | 20   | 0.32   |   |
| 1432 | Arl14ep        | 1.68 | 47  | 6.6   | 81   | 11.1   |   |
| 1433 | Atp6v0a4       | 1.68 | 12  | 0.45  | 24   | 0.75   |   |
| 1434 | Bves           | 1.68 | 20  | 2.94  | 72   | 4.94   |   |
| 1435 | Cdkn2c         | 1.68 | 9   | 2.02  | 21   | 3.4    |   |
| 1436 | Flywch2        | 1.68 | 8   | 2.35  | 12   | 3.95   |   |
| 1437 | Grb10          | 1.68 | 5   | 0.28  | 14   | 0.47   |   |
| 1438 | Oraov1         | 1.68 | 6   | 2.16  | 18   | 3.64   |   |
| 1439 | Rdh16          | 1.68 | 70  | 0.62  | 129  | 1.04   |   |
| 1440 | Unc13b         | 1.68 | 33  | 0.47  | 39   | 0.8    |   |
| 1441 | Adam19         | 1.68 | 77  | 3.69  | 160  | 6.2    |   |
| 1442 | Dusp8          | 1.68 | 8   | 1.48  | 19   | 2.49   |   |
| 1443 | Fgd6           | 1.68 | 8   | 0.26  | 19   | 0.44   |   |
| 1444 | Gzmb_2         | 1.68 | 3   | 0.94  | 5    | 1.58   |   |
| 1445 | Kri1           | 1.68 | 32  | 2.77  | 55   | 4.67   |   |

Supplemental Table 3  
 FSH + Ad-E versus FSH + Ad-FOXO1(A3), 24 hours

|      | A              | B    | C    | D     | E    | F      | G |
|------|----------------|------|------|-------|------|--------|---|
| 1446 | Mib1           | 1.68 | 230  | 12.26 | 484  | 20.62  |   |
| 1447 | Mrc1           | 1.68 | 10   | 0.28  | 14   | 0.47   |   |
| 1448 | Pcdhb17        | 1.68 | 4    | 0.6   | 9    | 1.02   |   |
| 1449 | Pdss1          | 1.68 | 28   | 1     | 52   | 1.69   |   |
| 1450 | Plagl1         | 1.68 | 7    | 0.62  | 18   | 1.05   |   |
| 1451 | Ppih           | 1.68 | 7    | 7.5   | 22   | 12.62  |   |
| 1452 | Slc6a17        | 1.68 | 6    | 0.24  | 13   | 0.41   |   |
| 1453 | Y_RNA_9        | 1.68 | 4    | 12.93 | 9    | 21.75  |   |
| 1454 | Zfp3           | 1.68 | 8    | 1.18  | 19   | 1.99   |   |
| 1455 | AABR07070810.1 | 1.68 | 0    | 2.91  | 1    | 4.89   |   |
| 1456 | Hivep3         | 1.68 | 6    | 0.13  | 11   | 0.22   |   |
| 1457 | Zbtb46         | 1.68 | 31   | 1     | 51   | 1.69   |   |
| 1458 | Phex           | 1.68 | 99   | 7.64  | 220  | 12.83  |   |
| 1459 | Mrps9          | 1.68 | 61   | 9.56  | 123  | 16.03  |   |
| 1460 | RGD1311595     | 1.68 | 124  | 4.56  | 261  | 7.64   |   |
| 1461 | Ankle2         | 1.68 | 244  | 12.75 | 494  | 21.35  |   |
| 1462 | F2r            | 1.67 | 251  | 26.03 | 585  | 43.59  |   |
| 1463 | Bmp4           | 1.67 | 47   | 7.71  | 113  | 12.91  |   |
| 1464 | Gpbp1l2        | 1.67 | 11   | 2.29  | 22   | 3.83   |   |
| 1465 | Psd3           | 1.67 | 389  | 12.62 | 754  | 21.12  |   |
| 1466 | Trim59         | 1.67 | 25   | 2.74  | 52   | 4.59   |   |
| 1467 | LOC361990      | 1.67 | 245  | 21.19 | 432  | 35.44  |   |
| 1468 | Cpd            | 1.67 | 682  | 45.89 | 1518 | 76.72  |   |
| 1469 | Asap2          | 1.67 | 65   | 4.2   | 143  | 7.03   |   |
| 1470 | Eif4e3         | 1.67 | 20   | 2.42  | 54   | 4.05   |   |
| 1471 | Kirrel         | 1.67 | 218  | 10.58 | 497  | 17.67  |   |
| 1472 | Lhfp           | 1.67 | 110  | 14.25 | 312  | 23.77  |   |
| 1473 | Rab33a         | 1.67 | 18   | 3.47  | 40   | 5.78   |   |
| 1474 | Cpne8          | 1.67 | 43   | 2.79  | 105  | 4.65   |   |
| 1475 | Zfp385a        | 1.67 | 14   | 1.81  | 31   | 3.02   |   |
| 1476 | Prtfdc1        | 1.67 | 292  | 18.96 | 682  | 31.6   |   |
| 1477 | Cd2ap          | 1.67 | 78   | 8.06  | 165  | 13.44  |   |
| 1478 | Jak1           | 1.67 | 1157 | 89.78 | 2668 | 149.57 |   |
| 1479 | Golga4         | 1.66 | 330  | 13.47 | 740  | 22.41  |   |
| 1480 | Lrrk2          | 1.66 | 73   | 1.38  | 117  | 2.29   |   |
| 1481 | Gclm           | 1.66 | 61   | 11.94 | 122  | 19.86  |   |
| 1482 | AABR07042397.1 | 1.66 | 0    | 12.23 | 0    | 20.34  |   |
| 1483 | Prx            | 1.66 | 11   | 0.7   | 26   | 1.17   |   |
| 1484 | Kctd9          | 1.66 | 68   | 6.29  | 160  | 10.46  |   |
| 1485 | Lama5          | 1.66 | 40   | 1.15  | 85   | 1.91   |   |
| 1486 | LOC100360638_1 | 1.66 | 17   | 2.8   | 38   | 4.66   |   |
| 1487 | Spdl1          | 1.66 | 15   | 1.42  | 24   | 2.36   |   |
| 1488 | Tigd2          | 1.66 | 9    | 2.06  | 20   | 3.42   |   |
| 1489 | Heg1           | 1.66 | 591  | 30.25 | 1319 | 50.23  |   |
| 1490 | Fhl1           | 1.66 | 177  | 22.27 | 398  | 36.98  |   |
| 1491 | Alpk1          | 1.66 | 65   | 2.15  | 153  | 3.57   |   |
| 1492 | Hnrnpdl        | 1.66 | 119  | 17.37 | 247  | 28.81  |   |
| 1493 | Mxra7          | 1.66 | 147  | 14.98 | 239  | 24.83  |   |
| 1494 | Syne2          | 1.66 | 1476 | 21.3  | 3109 | 35.3   |   |
| 1495 | Plxna2         | 1.66 | 239  | 6.81  | 551  | 11.28  |   |
| 1496 | Gsn            | 1.66 | 182  | 23.34 | 420  | 38.66  |   |
| 1497 | Brd9           | 1.66 | 143  | 10.26 | 254  | 16.99  |   |
| 1498 | Errfi1         | 1.66 | 91   | 8.5   | 201  | 14.08  |   |
| 1499 | Tgfb2          | 1.66 | 37   | 3.64  | 84   | 6.03   |   |

Supplemental Table 3  
 FSH + Ad-E versus FSH + Ad-FOXO1(A3), 24 hours

|      | A              | B    | C    | D     | E    | F      | G |
|------|----------------|------|------|-------|------|--------|---|
| 1500 | Timm8a1_2      | 1.66 | 14   | 10.74 | 27   | 17.78  |   |
| 1501 | Itgb1          | 1.66 | 1209 | 116   | 2674 | 192.03 |   |
| 1502 | Sacs           | 1.65 | 117  | 2.48  | 258  | 4.1    |   |
| 1503 | Gpatch2        | 1.65 | 64   | 4.03  | 139  | 6.66   |   |
| 1504 | Mmadhc         | 1.65 | 41   | 9.76  | 94   | 16.14  |   |
| 1505 | Rnft1          | 1.65 | 27   | 5.76  | 60   | 9.52   |   |
| 1506 | Taf7           | 1.65 | 19   | 3.9   | 42   | 6.44   |   |
| 1507 | Hnrnpr         | 1.65 | 41   | 8.53  | 96   | 14.09  |   |
| 1508 | Mlit3          | 1.65 | 56   | 3.56  | 99   | 5.88   |   |
| 1509 | Nlrp1a         | 1.65 | 28   | 1.23  | 67   | 2.03   |   |
| 1510 | Tmem65         | 1.65 | 131  | 3.54  | 246  | 5.85   |   |
| 1511 | Npl            | 1.65 | 99   | 9.03  | 254  | 14.9   |   |
| 1512 | Rapgef6        | 1.65 | 98   | 2.66  | 156  | 4.38   |   |
| 1513 | AABR07000121.1 | 1.64 | 12   | 0.59  | 27   | 0.98   |   |
| 1514 | AABR07052388.1 | 1.64 | 10   | 2.06  | 22   | 3.39   |   |
| 1515 | AABR07061378.1 | 1.64 | 0    | 7.75  | 0    | 12.75  |   |
| 1516 | Jag1           | 1.64 | 25   | 1.62  | 63   | 2.67   |   |
| 1517 | Kif5a          | 1.64 | 13   | 0.29  | 24   | 0.48   |   |
| 1518 | Nudt8          | 1.64 | 7    | 2.23  | 11   | 3.66   |   |
| 1519 | Reps2          | 1.64 | 24   | 2.03  | 37   | 3.34   |   |
| 1520 | Rhpn2          | 1.64 | 9    | 0.57  | 21   | 0.93   |   |
| 1521 | Surf2          | 1.64 | 0    | 1.56  | 0    | 2.57   |   |
| 1522 | Tsen54         | 1.64 | 32   | 3.66  | 60   | 6.02   |   |
| 1523 | Depdc7         | 1.64 | 13   | 2.12  | 25   | 3.49   |   |
| 1524 | ldnk           | 1.64 | 21   | 1.1   | 26   | 1.81   |   |
| 1525 | Ino80b         | 1.64 | 0    | 3.17  | 2    | 5.21   |   |
| 1526 | Lrp2           | 1.64 | 21   | 0.23  | 27   | 0.38   |   |
| 1527 | Cspg4          | 1.64 | 102  | 4.3   | 226  | 7.07   |   |
| 1528 | Bnip2          | 1.64 | 286  | 14.91 | 515  | 24.49  |   |
| 1529 | Rasa1          | 1.64 | 217  | 20.18 | 471  | 33.13  |   |
| 1530 | Otud4          | 1.64 | 133  | 11.15 | 298  | 18.3   |   |
| 1531 | Emp2           | 1.64 | 77   | 8.33  | 167  | 13.67  |   |
| 1532 | Pde7a          | 1.64 | 70   | 4.02  | 138  | 6.59   |   |
| 1533 | Itga3          | 1.64 | 86   | 6.49  | 195  | 10.65  |   |
| 1534 | Med22_2        | 1.64 | 0    | 14.54 | 1    | 23.85  |   |
| 1535 | Eif5a2         | 1.64 | 41   | 3.12  | 94   | 5.11   |   |
| 1536 | Esco1          | 1.64 | 115  | 5.88  | 191  | 9.62   |   |
| 1537 | Fbxw7          | 1.64 | 50   | 3.71  | 113  | 6.07   |   |
| 1538 | Fbxo30         | 1.64 | 78   | 8.36  | 172  | 13.68  |   |
| 1539 | RGD1307235     | 1.64 | 160  | 5.97  | 315  | 9.77   |   |
| 1540 | Vps26a         | 1.64 | 78   | 13.77 | 158  | 22.53  |   |
| 1541 | Slc38a4        | 1.64 | 25   | 1.44  | 50   | 2.36   |   |
| 1542 | Als2cl         | 1.64 | 25   | 2.03  | 49   | 3.31   |   |
| 1543 | Crcp           | 1.64 | 48   | 3.75  | 79   | 6.13   |   |
| 1544 | Nhs1           | 1.63 | 60   | 2.81  | 135  | 4.59   |   |
| 1545 | Svil           | 1.63 | 189  | 6.7   | 427  | 10.95  |   |
| 1546 | Mpdz           | 1.63 | 156  | 5.42  | 315  | 8.86   |   |
| 1547 | Plcd1          | 1.63 | 30   | 3.56  | 71   | 5.82   |   |
| 1548 | Smpdl3a        | 1.63 | 28   | 5.49  | 63   | 8.96   |   |
| 1549 | Sp4            | 1.63 | 52   | 3.98  | 119  | 6.5    |   |
| 1550 | AABR07015956.1 | 1.63 | 19   | 3.72  | 43   | 6.07   |   |
| 1551 | Ccs            | 1.63 | 26   | 3.59  | 62   | 5.86   |   |
| 1552 | Lrrc61         | 1.63 | 16   | 1.44  | 24   | 2.34   |   |
| 1553 | Cacul1         | 1.63 | 151  | 11.45 | 342  | 18.67  |   |

Supplemental Table 3  
 FSH + Ad-E versus FSH + Ad-FOXO1(A3), 24 hours

|      | A              | B    | C    | D      | E    | F      | G |
|------|----------------|------|------|--------|------|--------|---|
| 1554 | Ctnna2         | 1.63 | 17   | 2.78   | 35   | 4.54   |   |
| 1555 | Fam92a1        | 1.63 | 39   | 7.46   | 54   | 12.17  |   |
| 1556 | Strn           | 1.63 | 107  | 7.19   | 200  | 11.72  |   |
| 1557 | Taok1          | 1.63 | 181  | 16.29  | 367  | 26.53  |   |
| 1558 | SNORD24_3      | 1.63 | 28   | 123.63 | 61   | 201.37 |   |
| 1559 | Fbrs           | 1.63 | 22   | 7.24   | 39   | 11.79  |   |
| 1560 | Ydjc           | 1.63 | 34   | 7.19   | 66   | 11.71  |   |
| 1561 | Mrpl18         | 1.63 | 27   | 6.51   | 54   | 10.6   |   |
| 1562 | Fam63b         | 1.63 | 42   | 3.88   | 91   | 6.3    |   |
| 1563 | Nr3c1_2        | 1.62 | 29   | 8.47   | 61   | 13.76  |   |
| 1564 | C2cd2          | 1.62 | 72   | 3.83   | 144  | 6.21   |   |
| 1565 | Stx7           | 1.62 | 24   | 8.23   | 48   | 13.34  |   |
| 1566 | Ptrf           | 1.62 | 1292 | 144.9  | 2811 | 234.98 |   |
| 1567 | Mtmr6          | 1.62 | 162  | 13.66  | 339  | 22.14  |   |
| 1568 | Sacm1l         | 1.62 | 154  | 11.43  | 296  | 18.54  |   |
| 1569 | RGD1566386     | 1.62 | 19   | 0.72   | 23   | 1.16   |   |
| 1570 | B3galt4        | 1.62 | 6    | 1.38   | 13   | 2.23   |   |
| 1571 | Fam207a        | 1.62 | 46   | 5      | 87   | 8.1    |   |
| 1572 | Gnao1          | 1.62 | 46   | 1.05   | 54   | 1.7    |   |
| 1573 | Irx3           | 1.62 | 6    | 1.39   | 13   | 2.25   |   |
| 1574 | LOC100912195   | 1.62 | 24   | 12.26  | 52   | 19.85  |   |
| 1575 | LOC102550026   | 1.62 | 3    | 0.72   | 11   | 1.16   |   |
| 1576 | 03/03/15       | 1.62 | 33   | 1.12   | 60   | 1.82   |   |
| 1577 | Nell1          | 1.62 | 36   | 0.75   | 53   | 1.22   |   |
| 1578 | Nfatc4         | 1.62 | 14   | 0.72   | 28   | 1.17   |   |
| 1579 | Pecr           | 1.62 | 11   | 1.76   | 20   | 2.86   |   |
| 1580 | Cdo1           | 1.62 | 14   | 2.87   | 32   | 4.64   |   |
| 1581 | Fnbp1          | 1.62 | 84   | 4.07   | 140  | 6.6    |   |
| 1582 | RGD1311458     | 1.62 | 18   | 2.08   | 35   | 3.36   |   |
| 1583 | Serpinc1       | 1.62 | 128  | 0.63   | 238  | 1.02   |   |
| 1584 | Acot9          | 1.62 | 48   | 9.6    | 112  | 15.52  |   |
| 1585 | Ptpn14         | 1.62 | 64   | 3.15   | 124  | 5.09   |   |
| 1586 | Itga1          | 1.62 | 82   | 5.38   | 186  | 8.7    |   |
| 1587 | Mettl16        | 1.61 | 45   | 4.51   | 92   | 7.29   |   |
| 1588 | Pggt1b         | 1.61 | 44   | 5.79   | 82   | 9.35   |   |
| 1589 | Sptbn1         | 1.61 | 1642 | 70.62  | 3528 | 113.98 |   |
| 1590 | Cdc45          | 1.61 | 30   | 1.08   | 57   | 1.74   |   |
| 1591 | Ddit3          | 1.61 | 38   | 7.44   | 71   | 12     |   |
| 1592 | Dixdc1         | 1.61 | 35   | 1.22   | 63   | 1.97   |   |
| 1593 | Hlcs           | 1.61 | 152  | 4.87   | 218  | 7.86   |   |
| 1594 | Zfp874b        | 1.61 | 38   | 4.3    | 58   | 6.95   |   |
| 1595 | AABR07056556.2 | 1.61 | 0    | 102.81 | 0    | 165.66 |   |
| 1596 | Pvrl3          | 1.61 | 202  | 12.88  | 416  | 20.76  |   |
| 1597 | Cfdp1          | 1.61 | 201  | 13.37  | 431  | 21.54  |   |
| 1598 | AABR07015055.1 | 1.61 | 0    | 11.45  | 0    | 18.44  |   |
| 1599 | Chmp4c         | 1.61 | 24   | 2.96   | 37   | 4.76   |   |
| 1600 | lpo11          | 1.61 | 85   | 4.82   | 123  | 7.76   |   |
| 1601 | Cpq            | 1.61 | 133  | 16.13  | 297  | 25.96  |   |
| 1602 | LOC103690317   | 1.61 | 51   | 33.51  | 110  | 53.93  |   |
| 1603 | Atp6v1f        | 1.61 | 47   | 25.9   | 98   | 41.68  |   |
| 1604 | Zbtb47         | 1.61 | 44   | 5.46   | 91   | 8.79   |   |
| 1605 | Tbl1xr1        | 1.61 | 128  | 4.95   | 303  | 7.96   |   |
| 1606 | Bloc1s6        | 1.61 | 56   | 4.16   | 109  | 6.69   |   |
| 1607 | 09/01/15       | 1.61 | 48   | 11.55  | 118  | 18.56  |   |

Supplemental Table 3  
 FSH + Ad-E versus FSH + Ad-FOXO1(A3), 24 hours

|      | A              | B    | C   | D      | E    | F      | G |
|------|----------------|------|-----|--------|------|--------|---|
| 1608 | Tuft1          | 1.61 | 31  | 2.13   | 63   | 3.42   |   |
| 1609 | AABR07058124.3 | 1.61 | 20  | 23.21  | 43   | 37.31  |   |
| 1610 | Sub1           | 1.61 | 66  | 35.44  | 116  | 56.93  |   |
| 1611 | Prss23         | 1.61 | 777 | 105.68 | 1699 | 169.68 |   |
| 1612 | Chd2           | 1.61 | 265 | 7.68   | 551  | 12.34  |   |
| 1613 | Nol8           | 1.61 | 3   | 2.67   | 3    | 4.28   |   |
| 1614 | LOC100361139   | 1.6  | 49  | 42.08  | 103  | 67.51  |   |
| 1615 | Erbp2ip        | 1.6  | 252 | 13.49  | 509  | 21.63  |   |
| 1616 | Pkd1l3         | 1.6  | 461 | 0.38   | 515  | 0.61   |   |
| 1617 | Zfp40          | 1.6  | 14  | 1.78   | 30   | 2.85   |   |
| 1618 | Zswim7         | 1.6  | 32  | 3.62   | 38   | 5.8    |   |
| 1619 | AABR07032135.1 | 1.6  | 12  | 5.04   | 26   | 8.07   |   |
| 1620 | Hacd1          | 1.6  | 27  | 3.52   | 74   | 5.63   |   |
| 1621 | Map4k5         | 1.6  | 161 | 10     | 345  | 16.01  |   |
| 1622 | RGD1564883     | 1.6  | 0   | 3.53   | 2    | 5.66   |   |
| 1623 | Rpl39_1        | 1.6  | 0   | 16.25  | 0    | 26.03  |   |
| 1624 | Rundc3b        | 1.6  | 21  | 0.68   | 28   | 1.08   |   |
| 1625 | Tomm70a        | 1.6  | 25  | 9.04   | 74   | 14.48  |   |
| 1626 | Vash2          | 1.6  | 44  | 2.7    | 101  | 4.32   |   |
| 1627 | AABR07001899.1 | 1.6  | 120 | 0.79   | 160  | 1.26   |   |
| 1628 | AABR07071814.2 | 1.6  | 14  | 3.6    | 30   | 5.77   |   |
| 1629 | Zfp28          | 1.6  | 16  | 1.98   | 32   | 3.17   |   |
| 1630 | Mtx2           | 1.6  | 73  | 10.75  | 114  | 17.2   |   |
| 1631 | Potef          | 1.6  | 802 | 674.81 | 2124 | 1079.1 |   |
| 1632 | Vrk1           | 1.6  | 70  | 5.59   | 118  | 8.94   |   |
| 1633 | Cfl2           | 1.6  | 117 | 14.36  | 251  | 22.96  |   |
| 1634 | Farp1          | 1.6  | 164 | 6.9    | 333  | 11.03  |   |
| 1635 | Myo1c          | 1.6  | 511 | 47.97  | 1098 | 76.66  |   |
| 1636 | Shoc2          | 1.6  | 144 | 14.75  | 303  | 23.56  |   |
| 1637 | Klf8           | 1.6  | 27  | 1.45   | 55   | 2.31   |   |
| 1638 | Tgfb1i1        | 1.6  | 188 | 32.46  | 389  | 51.85  |   |
| 1639 | Lrrc2          | 1.6  | 61  | 4.85   | 153  | 7.74   |   |
| 1640 | Rc3h1          | 1.6  | 195 | 8.4    | 392  | 13.41  |   |
| 1641 | Testin         | 1.59 | 16  | 3.98   | 34   | 6.35   |   |
| 1642 | Tmed5          | 1.59 | 43  | 5.9    | 89   | 9.41   |   |
| 1643 | Slc4a1ap       | 1.59 | 66  | 5.08   | 113  | 8.1    |   |
| 1644 | AABR07021704.1 | 1.59 | 41  | 4.1    | 79   | 6.53   |   |
| 1645 | Kcnma1         | 1.59 | 141 | 4.04   | 288  | 6.44   |   |
| 1646 | Fgd3           | 1.59 | 77  | 4.91   | 168  | 7.82   |   |
| 1647 | Pros1          | 1.59 | 839 | 84.32  | 1863 | 134.34 |   |
| 1648 | Emb            | 1.59 | 27  | 7.81   | 53   | 12.44  |   |
| 1649 | Nras           | 1.59 | 96  | 25.7   | 204  | 40.94  |   |
| 1650 | AABR07028886.3 | 1.59 | 5   | 13.12  | 22   | 20.89  |   |
| 1651 | Uspl1          | 1.59 | 79  | 6.07   | 164  | 9.65   |   |
| 1652 | Atp11c         | 1.59 | 46  | 3.13   | 105  | 4.98   |   |
| 1653 | Nedd1          | 1.59 | 54  | 3.66   | 103  | 5.82   |   |
| 1654 | Ist1           | 1.59 | 183 | 27.7   | 308  | 44.06  |   |
| 1655 | Pwp1           | 1.59 | 53  | 7.04   | 92   | 11.19  |   |
| 1656 | Fam126b        | 1.59 | 48  | 1.55   | 110  | 2.46   |   |
| 1657 | Igfbp7         | 1.59 | 65  | 7.89   | 93   | 12.53  |   |
| 1658 | Mturn          | 1.59 | 13  | 1.84   | 33   | 2.92   |   |
| 1659 | RGD1304595     | 1.59 | 21  | 1.46   | 42   | 2.32   |   |
| 1660 | Ttc12          | 1.59 | 12  | 1.31   | 26   | 2.08   |   |
| 1661 | Fah            | 1.59 | 13  | 2.1    | 30   | 3.34   |   |

Supplemental Table 3  
 FSH + Ad-E versus FSH + Ad-FOXO1(A3), 24 hours

|      | A              | B    | C   | D      | E    | F      | G |
|------|----------------|------|-----|--------|------|--------|---|
| 1662 | Xk             | 1.59 | 12  | 0.57   | 22   | 0.91   |   |
| 1663 | Zfp13          | 1.59 | 16  | 1.36   | 21   | 2.17   |   |
| 1664 | LOC287167      | 1.59 | 818 | 713.17 | 1754 | 1132.6 |   |
| 1665 | Pmvk           | 1.59 | 54  | 10.94  | 104  | 17.35  |   |
| 1666 | Angpt2         | 1.58 | 29  | 7.41   | 51   | 11.75  |   |
| 1667 | LOC100912399_1 | 1.58 | 14  | 9.95   | 29   | 15.76  |   |
| 1668 | Hexb           | 1.58 | 92  | 9.4    | 165  | 14.9   |   |
| 1669 | Slc24a3        | 1.58 | 74  | 9.62   | 179  | 15.24  |   |
| 1670 | Anxa4          | 1.58 | 129 | 19.73  | 270  | 31.24  |   |
| 1671 | LOC654482      | 1.58 | 28  | 4.68   | 52   | 7.4    |   |
| 1672 | Sytl4          | 1.58 | 26  | 2.54   | 56   | 4.03   |   |
| 1673 | Trmt12         | 1.58 | 17  | 3.79   | 36   | 6      |   |
| 1674 | Fbxl3          | 1.58 | 104 | 8.51   | 213  | 13.47  |   |
| 1675 | Pdlim1         | 1.58 | 139 | 29.54  | 320  | 46.74  |   |
| 1676 | Ppp1r14b       | 1.58 | 139 | 69.3   | 294  | 109.63 |   |
| 1677 | Zfp830         | 1.58 | 26  | 6.42   | 55   | 10.15  |   |
| 1678 | Derl2          | 1.58 | 41  | 8.14   | 66   | 12.88  |   |
| 1679 | Smndc1         | 1.58 | 70  | 8.93   | 150  | 14.11  |   |
| 1680 | Zfp26          | 1.58 | 65  | 6.54   | 135  | 10.33  |   |
| 1681 | Elf1           | 1.58 | 119 | 9.23   | 259  | 14.57  |   |
| 1682 | AABR07059891.1 | 1.58 | 16  | 11.08  | 24   | 17.49  |   |
| 1683 | LOC500035      | 1.58 | 10  | 9.79   | 25   | 15.44  |   |
| 1684 | Ypel4          | 1.58 | 24  | 1.94   | 50   | 3.06   |   |
| 1685 | Rps6ka2        | 1.58 | 26  | 1.21   | 46   | 1.91   |   |
| 1686 | SNORD26        | 1.58 | 9   | 43.45  | 19   | 68.58  |   |
| 1687 | Morc3          | 1.58 | 210 | 9.36   | 361  | 14.77  |   |
| 1688 | Lipa           | 1.58 | 813 | 84.17  | 1747 | 132.72 |   |
| 1689 | Kidins220      | 1.58 | 403 | 17.7   | 884  | 27.91  |   |
| 1690 | Kat2b          | 1.58 | 12  | 5.49   | 34   | 8.66   |   |
| 1691 | Cdipt          | 1.57 | 95  | 18.27  | 199  | 28.77  |   |
| 1692 | Zfp36l1        | 1.57 | 196 | 25.08  | 419  | 39.49  |   |
| 1693 | Hnrnpul2       | 1.57 | 243 | 32.18  | 493  | 50.66  |   |
| 1694 | Exog           | 1.57 | 29  | 1.69   | 63   | 2.65   |   |
| 1695 | Hr             | 1.57 | 20  | 1.14   | 41   | 1.79   |   |
| 1696 | Lgmn           | 1.57 | 41  | 6.93   | 88   | 10.91  |   |
| 1697 | Pcdh9          | 1.57 | 86  | 8.92   | 180  | 14.03  |   |
| 1698 | Foxp2          | 1.57 | 393 | 6.22   | 632  | 9.78   |   |
| 1699 | LOC100911576   | 1.57 | 5   | 12.26  | 9    | 19.26  |   |
| 1700 | Fam76a         | 1.57 | 47  | 5.79   | 106  | 9.1    |   |
| 1701 | Zfp597         | 1.57 | 11  | 2.87   | 21   | 4.51   |   |
| 1702 | Gpatch3        | 1.57 | 12  | 2.03   | 21   | 3.19   |   |
| 1703 | RGD1559955     | 1.57 | 0   | 8.87   | 1    | 13.93  |   |
| 1704 | Zfp870         | 1.57 | 13  | 2.17   | 22   | 3.41   |   |
| 1705 | Map4           | 1.57 | 611 | 21.92  | 1274 | 34.37  |   |
| 1706 | Klhl24         | 1.57 | 153 | 26.95  | 333  | 42.26  |   |
| 1707 | Atp2b1         | 1.57 | 474 | 32.64  | 1034 | 51.17  |   |
| 1708 | Ppp1r12a       | 1.57 | 475 | 19.65  | 981  | 30.8   |   |
| 1709 | LOC100911453   | 1.57 | 0   | 3.07   | 0    | 4.81   |   |
| 1710 | Nek6           | 1.56 | 52  | 6.6    | 114  | 10.32  |   |
| 1711 | Serpib9        | 1.56 | 243 | 45.76  | 508  | 71.61  |   |
| 1712 | Zfpm2          | 1.56 | 451 | 11.98  | 1094 | 18.74  |   |
| 1713 | Cited4         | 1.56 | 11  | 4.46   | 23   | 6.98   |   |
| 1714 | Il1rap         | 1.56 | 63  | 2.35   | 101  | 3.67   |   |
| 1715 | Rnf217         | 1.56 | 27  | 3.26   | 81   | 5.09   |   |



Supplemental Table 3  
 FSH + Ad-E versus FSH + Ad-FOXO1(A3), 24 hours

|      | A              | B    | C    | D      | E    | F      | G |
|------|----------------|------|------|--------|------|--------|---|
| 1716 | Snurf          | 1.56 | 3    | 5.43   | 5    | 8.49   |   |
| 1717 | Hdac7          | 1.56 | 74   | 6.07   | 161  | 9.48   |   |
| 1718 | Rbpms          | 1.56 | 61   | 6.72   | 141  | 10.5   |   |
| 1719 | RGD1305420     | 1.56 | 11   | 1.06   | 23   | 1.65   |   |
| 1720 | S100a4         | 1.56 | 22   | 12.2   | 47   | 19.07  |   |
| 1721 | Stk10          | 1.56 | 29   | 1.31   | 38   | 2.05   |   |
| 1722 | Paip2b         | 1.56 | 24   | 6.14   | 46   | 9.59   |   |
| 1723 | Flrt2          | 1.56 | 89   | 8.37   | 201  | 13.07  |   |
| 1724 | Myo18a         | 1.56 | 200  | 8.54   | 420  | 13.34  |   |
| 1725 | RGD1559896     | 1.56 | 401  | 46.12  | 832  | 72.04  |   |
| 1726 | Fbxo8          | 1.56 | 61   | 8.84   | 130  | 13.8   |   |
| 1727 | Lbh            | 1.56 | 42   | 26.53  | 105  | 41.42  |   |
| 1728 | Hibadh         | 1.56 | 154  | 18.84  | 315  | 29.41  |   |
| 1729 | Vwa5a_1        | 1.56 | 2    | 7.65   | 2    | 11.94  |   |
| 1730 | Yap1           | 1.56 | 279  | 42.89  | 551  | 66.93  |   |
| 1731 | Robo2          | 1.56 | 41   | 0.81   | 78   | 1.26   |   |
| 1732 | Zfp143         | 1.56 | 38   | 2.77   | 60   | 4.32   |   |
| 1733 | Zfp865_1       | 1.56 | 21   | 3.52   | 46   | 5.5    |   |
| 1734 | Map4k4         | 1.56 | 923  | 48.15  | 1913 | 75.1   |   |
| 1735 | Eif1ad         | 1.56 | 42   | 4.97   | 81   | 7.75   |   |
| 1736 | Klf4           | 1.56 | 71   | 12.55  | 141  | 19.56  |   |
| 1737 | Adam9          | 1.56 | 230  | 23.52  | 511  | 36.66  |   |
| 1738 | LOC100361103_2 | 1.56 | 60   | 115.44 | 124  | 179.9  |   |
| 1739 | Dock8          | 1.56 | 34   | 0.58   | 36   | 0.9    |   |
| 1740 | Hdac5          | 1.56 | 113  | 13.34  | 233  | 20.78  |   |
| 1741 | Rgmb           | 1.56 | 27   | 6.63   | 61   | 10.32  |   |
| 1742 | Rnaseh1        | 1.56 | 28   | 3.16   | 63   | 4.93   |   |
| 1743 | AABR07050399.1 | 1.56 | 0    | 7.21   | 0    | 11.22  |   |
| 1744 | Frs2           | 1.56 | 163  | 7.31   | 326  | 11.38  |   |
| 1745 | Alyref         | 1.56 | 76   | 19.8   | 153  | 30.82  |   |
| 1746 | Bod111         | 1.56 | 324  | 11.23  | 670  | 17.48  |   |
| 1747 | Dock11         | 1.56 | 63   | 2.7    | 142  | 4.2    |   |
| 1748 | Flna           | 1.55 | 4694 | 200.36 | 9802 | 311.56 |   |
| 1749 | Cops5          | 1.55 | 114  | 21.14  | 231  | 32.87  |   |
| 1750 | Rai2           | 1.55 | 241  | 24.85  | 471  | 38.64  |   |
| 1751 | Dnajc9         | 1.55 | 41   | 8.61   | 84   | 13.37  |   |
| 1752 | Cep126         | 1.55 | 37   | 1.14   | 61   | 1.76   |   |
| 1753 | LOC100910838   | 1.55 | 14   | 2.44   | 22   | 3.79   |   |
| 1754 | Lrrtm3         | 1.55 | 105  | 1.84   | 236  | 2.86   |   |
| 1755 | Mob3c          | 1.55 | 15   | 1.36   | 33   | 2.11   |   |
| 1756 | Myadm          | 1.55 | 330  | 41.42  | 687  | 64.21  |   |
| 1757 | Luzp1          | 1.55 | 140  | 4.08   | 289  | 6.33   |   |
| 1758 | Ttf1           | 1.55 | 79   | 3.09   | 146  | 4.78   |   |
| 1759 | AABR07063424.1 | 1.55 | 0    | 12.33  | 0    | 19.1   |   |
| 1760 | Itpk1          | 1.55 | 28   | 2.72   | 48   | 4.22   |   |
| 1761 | AC105693.1     | 1.55 | 17   | 2.9    | 26   | 4.49   |   |
| 1762 | Gng2           | 1.55 | 14   | 1.48   | 29   | 2.29   |   |
| 1763 | Il6r           | 1.55 | 38   | 2.21   | 70   | 3.42   |   |
| 1764 | Tmcc3          | 1.55 | 166  | 6      | 420  | 9.29   |   |
| 1765 | Ranbp9         | 1.55 | 168  | 12.4   | 310  | 19.2   |   |
| 1766 | Naca           | 1.55 | 440  | 22.79  | 896  | 35.27  |   |
| 1767 | Arid4a         | 1.55 | 58   | 2.87   | 112  | 4.45   |   |
| 1768 | Pdk1           | 1.55 | 77   | 13.3   | 132  | 20.57  |   |
| 1769 | Nr3c1_1        | 1.55 | 131  | 9.34   | 270  | 14.45  |   |

Supplemental Table 3  
 FSH + Ad-E versus FSH + Ad-FOXO1(A3), 24 hours

|      | A            | B    | C   | D      | E    | F      | G |
|------|--------------|------|-----|--------|------|--------|---|
| 1770 | Bcor         | 1.55 | 125 | 6.61   | 255  | 10.22  |   |
| 1771 | Golim4       | 1.55 | 220 | 23.57  | 425  | 36.45  |   |
| 1772 | Cdc42ep1     | 1.55 | 45  | 5.91   | 94   | 9.14   |   |
| 1773 | Apc          | 1.55 | 214 | 7.91   | 429  | 12.23  |   |
| 1774 | Ctsl         | 1.55 | 908 | 197.45 | 1892 | 305.13 |   |
| 1775 | Tshz3        | 1.55 | 21  | 1.08   | 42   | 1.68   |   |
| 1776 | Cited1       | 1.55 | 18  | 3.26   | 37   | 5.03   |   |
| 1777 | Ctxn1        | 1.55 | 61  | 17.98  | 127  | 27.79  |   |
| 1778 | LOC102555377 | 1.55 | 21  | 2.01   | 54   | 3.11   |   |
| 1779 | Smad6        | 1.55 | 165 | 7.92   | 310  | 12.24  |   |
| 1780 | Zfyve21      | 1.55 | 72  | 4.36   | 105  | 6.73   |   |
| 1781 | Snn          | 1.54 | 104 | 11.59  | 215  | 17.89  |   |
| 1782 | Caap1        | 1.54 | 50  | 3.83   | 89   | 5.91   |   |
| 1783 | Cep85l       | 1.54 | 34  | 1.82   | 56   | 2.81   |   |
| 1784 | Fchsd1       | 1.54 | 41  | 3.18   | 85   | 4.91   |   |
| 1785 | Ogfod1       | 1.54 | 21  | 2.86   | 44   | 4.41   |   |
| 1786 | Mkxn3        | 1.54 | 16  | 3.65   | 33   | 5.63   |   |
| 1787 | Taf13        | 1.54 | 21  | 4.25   | 41   | 6.56   |   |
| 1788 | Tlk1_1       | 1.54 | 7   | 5.61   | 17   | 8.65   |   |
| 1789 | Serinc3      | 1.54 | 760 | 126.88 | 1612 | 195.53 |   |
| 1790 | Eif2ak2      | 1.54 | 72  | 4.5    | 122  | 6.93   |   |
| 1791 | Tp53inp1     | 1.54 | 126 | 29.52  | 294  | 45.47  |   |
| 1792 | Slc25a32     | 1.54 | 28  | 2.67   | 57   | 4.1    |   |
| 1793 | Zswim1       | 1.54 | 17  | 4.5    | 35   | 6.93   |   |
| 1794 | Malsu1       | 1.54 | 25  | 8.24   | 45   | 12.68  |   |
| 1795 | Zbtb43       | 1.54 | 25  | 4.07   | 49   | 6.27   |   |
| 1796 | Mdfic        | 1.54 | 251 | 20.01  | 533  | 30.8   |   |
| 1797 | Mras         | 1.54 | 457 | 37.74  | 949  | 58.05  |   |
| 1798 | Antxr2       | 1.54 | 69  | 13.08  | 148  | 20.11  |   |
| 1799 | Epb4114a     | 1.54 | 49  | 3.15   | 84   | 4.84   |   |
| 1800 | L3mbtl3      | 1.54 | 45  | 4.75   | 87   | 7.3    |   |
| 1801 | LOC100365810 | 1.54 | 1   | 15.97  | 2    | 24.55  |   |
| 1802 | Sertad2      | 1.54 | 56  | 8.66   | 125  | 13.31  |   |
| 1803 | Piezo2       | 1.54 | 29  | 0.8    | 51   | 1.23   |   |
| 1804 | Ehbp1        | 1.54 | 267 | 7.7    | 618  | 11.83  |   |
| 1805 | Tbc1d19      | 1.54 | 68  | 7.02   | 141  | 10.78  |   |
| 1806 | Pold4        | 1.53 | 20  | 8.2    | 39   | 12.58  |   |
| 1807 | Glipr2       | 1.53 | 28  | 7.48   | 51   | 11.47  |   |
| 1808 | Tma16        | 1.53 | 25  | 2.02   | 52   | 3.1    |   |
| 1809 | Zfp703       | 1.53 | 38  | 4.29   | 78   | 6.58   |   |
| 1810 | Sarnp        | 1.53 | 122 | 19.25  | 221  | 29.51  |   |
| 1811 | Ppp3cc       | 1.53 | 205 | 15.53  | 464  | 23.81  |   |
| 1812 | Gpn3         | 1.53 | 24  | 4.54   | 52   | 6.95   |   |
| 1813 | Psmg2        | 1.53 | 35  | 6.08   | 60   | 9.32   |   |
| 1814 | Usp12        | 1.53 | 19  | 6.8    | 44   | 10.42  |   |
| 1815 | Zcrb1        | 1.53 | 54  | 5.52   | 88   | 8.47   |   |
| 1816 | Atp6v1c1     | 1.53 | 176 | 16.61  | 375  | 25.45  |   |
| 1817 | Ankrd12      | 1.53 | 146 | 3.81   | 277  | 5.84   |   |
| 1818 | Arhgap28     | 1.53 | 51  | 2.61   | 105  | 3.99   |   |
| 1819 | Orai3        | 1.53 | 23  | 2.84   | 50   | 4.35   |   |
| 1820 | Zfp503       | 1.53 | 22  | 2.57   | 44   | 3.93   |   |
| 1821 | Csnk1g1      | 1.53 | 105 | 2.48   | 195  | 3.79   |   |
| 1822 | Plek2        | 1.53 | 26  | 2.74   | 65   | 4.19   |   |
| 1823 | Mgea5        | 1.53 | 367 | 21.58  | 673  | 32.98  |   |

Supplemental Table 3  
 FSH + Ad-E versus FSH + Ad-FOXO1(A3), 24 hours

|      | A               | B    | C    | D      | E     | F      | G |
|------|-----------------|------|------|--------|-------|--------|---|
| 1824 | Sorbs2          | 1.53 | 161  | 5.22   | 328   | 7.97   |   |
| 1825 | Gtf2f1          | 1.53 | 76   | 14.52  | 147   | 22.18  |   |
| 1826 | Haus6           | 1.53 | 25   | 2.98   | 56    | 4.56   |   |
| 1827 | Rpl34           | 1.53 | 363  | 474.58 | 743   | 724.9  |   |
| 1828 | Cdc42bpa        | 1.53 | 186  | 6.66   | 348   | 10.18  |   |
| 1829 | Spopl           | 1.53 | 74   | 9.53   | 130   | 14.56  |   |
| 1830 | Tbc1d16         | 1.53 | 35   | 3.34   | 68    | 5.09   |   |
| 1831 | Utp14a          | 1.53 | 32   | 3.34   | 73    | 5.11   |   |
| 1832 | Pfkfb2          | 1.53 | 60   | 2      | 125   | 3.05   |   |
| 1833 | Ska2            | 1.53 | 69   | 7.61   | 96    | 11.61  |   |
| 1834 | Tmod2           | 1.53 | 48   | 6.85   | 73    | 10.44  |   |
| 1835 | Pitpnm2         | 1.52 | 66   | 2.57   | 130   | 3.92   |   |
| 1836 | Shroom2         | 1.52 | 131  | 5.01   | 259   | 7.64   |   |
| 1837 | AABR07040690.1  | 1.52 | 28   | 8.07   | 58    | 12.29  |   |
| 1838 | Sms             | 1.52 | 46   | 11.63  | 91    | 17.72  |   |
| 1839 | Tardbp          | 1.52 | 299  | 36.37  | 597   | 55.43  |   |
| 1840 | Lpp             | 1.52 | 302  | 17.35  | 755   | 26.43  |   |
| 1841 | Ccnyl1          | 1.52 | 130  | 9.35   | 270   | 14.25  |   |
| 1842 | Pbx1            | 1.52 | 315  | 39.77  | 581   | 60.58  |   |
| 1843 | AW549877        | 1.52 | 70   | 4.33   | 126   | 6.6    |   |
| 1844 | Cables1         | 1.52 | 115  | 7.66   | 218   | 11.66  |   |
| 1845 | ENSRNOG00000043 | 1.52 | 119  | 5.77   | 239   | 8.78   |   |
| 1846 | Pmm1            | 1.52 | 35   | 8.48   | 74    | 12.9   |   |
| 1847 | Vps13a          | 1.52 | 67   | 2.89   | 133   | 4.41   |   |
| 1848 | Sfpq            | 1.52 | 362  | 41.62  | 706   | 63.34  |   |
| 1849 | Usp15           | 1.52 | 88   | 4.74   | 187   | 7.22   |   |
| 1850 | AABR07021840.1  | 1.52 | 120  | 10.34  | 259   | 15.73  |   |
| 1851 | Ammecr1l        | 1.52 | 197  | 14.68  | 392   | 22.33  |   |
| 1852 | Rhobtb3         | 1.52 | 115  | 6.39   | 239   | 9.72   |   |
| 1853 | Calhm2          | 1.52 | 64   | 11.86  | 140   | 18.04  |   |
| 1854 | Itga11          | 1.52 | 97   | 7.06   | 193   | 10.73  |   |
| 1855 | Trip10          | 1.52 | 85   | 12.25  | 156   | 18.62  |   |
| 1856 | Syde1           | 1.52 | 102  | 13.71  | 201   | 20.84  |   |
| 1857 | Rbm7            | 1.52 | 36   | 8.13   | 77    | 12.36  |   |
| 1858 | Cog3            | 1.52 | 114  | 8.01   | 182   | 12.17  |   |
| 1859 | LOC100363408    | 1.52 | 26   | 16.05  | 55    | 24.37  |   |
| 1860 | Nab2            | 1.52 | 49   | 4.37   | 93    | 6.63   |   |
| 1861 | Zcchc9          | 1.52 | 49   | 7.21   | 87    | 10.95  |   |
| 1862 | Lims1           | 1.52 | 96   | 13.64  | 208   | 20.71  |   |
| 1863 | Med1            | 1.52 | 236  | 12.21  | 451   | 18.53  |   |
| 1864 | Proser1         | 1.52 | 113  | 8.01   | 225   | 12.16  |   |
| 1865 | Prpf39          | 1.52 | 161  | 10.06  | 291   | 15.27  |   |
| 1866 | Utp11l          | 1.52 | 35   | 9.07   | 71    | 13.76  |   |
| 1867 | Zbtb12          | 1.52 | 36   | 5.26   | 72    | 7.98   |   |
| 1868 | Raph1           | 1.51 | 75   | 3.72   | 151   | 5.63   |   |
| 1869 | Agfg1           | 1.51 | 189  | 21.48  | 338   | 32.53  |   |
| 1870 | Sgms1           | 1.51 | 157  | 8.25   | 369   | 12.49  |   |
| 1871 | Col11a1         | 1.51 | 8089 | 367.59 | 16772 | 556.09 |   |
| 1872 | Pacs1           | 1.51 | 207  | 16.31  | 407   | 24.67  |   |
| 1873 | Hsd3b7          | 1.51 | 54   | 9.28   | 112   | 14.02  |   |
| 1874 | Mxra8           | 1.51 | 97   | 14.63  | 195   | 22.11  |   |
| 1875 | Acsl5           | 1.51 | 65   | 7.38   | 127   | 11.15  |   |
| 1876 | Numa1           | 1.51 | 824  | 36.37  | 1676  | 54.88  |   |
| 1877 | LOC100362366    | 1.51 | 21   | 93.46  | 32    | 140.92 |   |

Supplemental Table 3  
 FSH + Ad-E versus FSH + Ad-FOXO1(A3), 24 hours

|      | A              | B    | C   | D     | E   | F     | G |
|------|----------------|------|-----|-------|-----|-------|---|
| 1878 | Tmeff2         | 1.51 | 407 | 18.51 | 996 | 27.91 |   |
| 1879 | Txlna          | 1.51 | 87  | 9.49  | 159 | 14.3  |   |
| 1880 | Fam117b        | 1.51 | 343 | 20.27 | 696 | 30.53 |   |
| 1881 | Fkbp3          | 1.51 | 89  | 20.78 | 172 | 31.3  |   |
| 1882 | Gtf2a2         | 1.51 | 100 | 31.91 | 197 | 48.05 |   |
| 1883 | Usp1           | 1.51 | 77  | 7.16  | 156 | 10.79 |   |
| 1884 | Aak1           | 1.51 | 220 | 3.45  | 372 | 5.19  |   |
| 1885 | Lmnb1          | 1.5  | 87  | 13.15 | 173 | 19.79 |   |
| 1886 | Inpp5f         | 1.5  | 97  | 6.19  | 192 | 9.32  |   |
| 1887 | Aida           | 1.5  | 124 | 11.38 | 225 | 17.11 |   |
| 1888 | Igsf9          | 1.5  | 191 | 13.36 | 372 | 20.1  |   |
| 1889 | Ercc6l2        | 1.5  | 178 | 5.59  | 310 | 8.41  |   |
| 1890 | Fus            | 1.5  | 269 | 45.31 | 485 | 67.9  |   |
| 1891 | 5S_rRNA_259    | 1.5  | 0   | 3.04  | 0   | 4.55  |   |
| 1892 | AABR07014275.1 | 1.5  | 0   | 0.35  | 0   | 0.53  |   |
| 1893 | Fam132b        | 1.5  | 3   | 0.35  | 11  | 0.53  |   |
| 1894 | Fancc          | 1.5  | 54  | 2.21  | 72  | 3.3   |   |
| 1895 | Hebp1          | 1.5  | 30  | 5.11  | 53  | 7.65  |   |
| 1896 | Ppapdc2        | 1.5  | 0   | 0.13  | 0   | 0.19  |   |
| 1897 | 5S_rRNA_118    | 1.5  | 0   | 3.42  | 0   | 5.11  |   |
| 1898 | AABR07002119.1 | 1.5  | 0   | 0.54  | 0   | 0.81  |   |
| 1899 | AABR07002775.1 | 1.5  | 0   | 0.2   | 0   | 0.29  |   |
| 1900 | AABR07004397.1 | 1.5  | 0   | 1.08  | 0   | 1.61  |   |
| 1901 | AABR07008066.2 | 1.5  | 3   | 5.75  | 6   | 8.59  |   |
| 1902 | AABR07014239.1 | 1.5  | 0   | 0.82  | 0   | 1.22  |   |
| 1903 | AABR07014272.1 | 1.5  | 1   | 0.36  | 2   | 0.54  |   |
| 1904 | AABR07015040.1 | 1.5  | 2   | 0.6   | 4   | 0.9   |   |
| 1905 | AABR07015078.2 | 1.5  | 0   | 0.94  | 0   | 1.41  |   |
| 1906 | AABR07017236.1 | 1.5  | 2   | 1.02  | 4   | 1.53  |   |
| 1907 | AABR07021465.2 | 1.5  | 2   | 0.94  | 5   | 1.4   |   |
| 1908 | AABR07024666.1 | 1.5  | 0   | 1.7   | 0   | 2.54  |   |
| 1909 | AABR07027518.1 | 1.5  | 0   | 1.42  | 0   | 2.12  |   |
| 1910 | AABR07027722.1 | 1.5  | 0   | 3.42  | 0   | 5.11  |   |
| 1911 | AABR07027799.1 | 1.5  | 0   | 0.22  | 0   | 0.33  |   |
| 1912 | AABR07028237.1 | 1.5  | 1   | 0.85  | 0   | 1.28  |   |
| 1913 | AABR07028989.1 | 1.5  | 3   | 0.18  | 3   | 0.27  |   |
| 1914 | AABR07028995.2 | 1.5  | 0   | 22.22 | 0   | 33.22 |   |
| 1915 | AABR07030254.1 | 1.5  | 1   | 0.37  | 2   | 0.55  |   |
| 1916 | AABR07036007.1 | 1.5  | 4   | 9.47  | 6   | 14.15 |   |
| 1917 | AABR07037536.1 | 1.5  | 1   | 0.45  | 4   | 0.68  |   |
| 1918 | AABR07040855.1 | 1.5  | 6   | 2.52  | 12  | 3.77  |   |
| 1919 | AABR07044362.1 | 1.5  | 12  | 1.02  | 21  | 1.53  |   |
| 1920 | AABR07046778.1 | 1.5  | 0   | 2.71  | 1   | 4.06  |   |
| 1921 | AABR07051207.1 | 1.5  | 0   | 3.26  | 1   | 4.88  |   |
| 1922 | AABR07051332.1 | 1.5  | 0   | 0.42  | 0   | 0.63  |   |
| 1923 | AABR07053479.1 | 1.5  | 4   | 1.19  | 11  | 1.78  |   |
| 1924 | AABR07053734.1 | 1.5  | 0   | 0.91  | 0   | 1.36  |   |
| 1925 | AABR07054332.1 | 1.5  | 0   | 2.73  | 0   | 4.07  |   |
| 1926 | AABR07058914.1 | 1.5  | 1   | 0.23  | 2   | 0.34  |   |
| 1927 | AABR07061825.1 | 1.5  | 1   | 1.49  | 3   | 2.23  |   |
| 1928 | AABR07067506.1 | 1.5  | 0   | 0.78  | 0   | 1.17  |   |
| 1929 | AABR07068214.1 | 1.5  | 1   | 0.91  | 3   | 1.37  |   |
| 1930 | AABR07070704.1 | 1.5  | 0   | 0.44  | 0   | 0.66  |   |
| 1931 | AABR07072371.1 | 1.5  | 0   | 0.42  | 0   | 0.63  |   |

Supplemental Table 3  
 FSH + Ad-E versus FSH + Ad-FOXO1(A3), 24 hours

|      | A               | B   | C   | D     | E   | F     | G |
|------|-----------------|-----|-----|-------|-----|-------|---|
| 1932 | Aaed1           | 1.5 | 114 | 2.81  | 229 | 4.21  |   |
| 1933 | Abhd3           | 1.5 | 18  | 1.14  | 27  | 1.7   |   |
| 1934 | AC094902.1      | 1.5 | 0   | 0.35  | 0   | 0.52  |   |
| 1935 | AC107531.2      | 1.5 | 4   | 1.65  | 5   | 2.46  |   |
| 1936 | AC111734.1      | 1.5 | 0   | 6.83  | 0   | 10.21 |   |
| 1937 | AC117101.1      | 1.5 | 0   | 1.61  | 1   | 2.41  |   |
| 1938 | AC118833.1      | 1.5 | 1   | 0.98  | 2   | 1.47  |   |
| 1939 | AC120448.1      | 1.5 | 1   | 2.83  | 2   | 4.23  |   |
| 1940 | AC127013.1      | 1.5 | 0   | 0.7   | 1   | 1.05  |   |
| 1941 | AC142154.1      | 1.5 | 0   | 0.15  | 0   | 0.22  |   |
| 1942 | Aldh1l2         | 1.5 | 3   | 0.26  | 8   | 0.39  |   |
| 1943 | Aox4            | 1.5 | 2   | 0.03  | 12  | 0.05  |   |
| 1944 | Apold1          | 1.5 | 3   | 0.38  | 6   | 0.56  |   |
| 1945 | Arc             | 1.5 | 1   | 0.12  | 1   | 0.18  |   |
| 1946 | Arntl2          | 1.5 | 22  | 0.91  | 28  | 1.35  |   |
| 1947 | Arsi            | 1.5 | 3   | 0.63  | 6   | 0.94  |   |
| 1948 | Atp1a2          | 1.5 | 9   | 0.28  | 18  | 0.42  |   |
| 1949 | Atp8b1          | 1.5 | 2   | 0.06  | 5   | 0.09  |   |
| 1950 | Aunip           | 1.5 | 11  | 0.55  | 7   | 0.82  |   |
| 1951 | Auts2l          | 1.5 | 42  | 0.55  | 72  | 0.82  |   |
| 1952 | AY172581.7      | 1.5 | 2   | 10.97 | 4   | 16.41 |   |
| 1953 | Cacnb4          | 1.5 | 4   | 0.1   | 9   | 0.14  |   |
| 1954 | Cap2            | 1.5 | 3   | 0.16  | 6   | 0.24  |   |
| 1955 | Car13           | 1.5 | 6   | 0.91  | 11  | 1.37  |   |
| 1956 | Card9           | 1.5 | 9   | 0.39  | 10  | 0.59  |   |
| 1957 | Ccdc122         | 1.5 | 6   | 0.24  | 18  | 0.36  |   |
| 1958 | Ccdc130         | 1.5 | 40  | 4.15  | 59  | 6.2   |   |
| 1959 | Ccdc159         | 1.5 | 6   | 0.41  | 6   | 0.62  |   |
| 1960 | Ccdc65          | 1.5 | 11  | 1.53  | 21  | 2.29  |   |
| 1961 | Ceacam19        | 1.5 | 1   | 0.18  | 2   | 0.27  |   |
| 1962 | Ckmt1b          | 1.5 | 2   | 0.43  | 4   | 0.64  |   |
| 1963 | Cmss1           | 1.5 | 5   | 0.75  | 6   | 1.12  |   |
| 1964 | Col6a1          | 1.5 | 4   | 0.35  | 7   | 0.53  |   |
| 1965 | Crebl2          | 1.5 | 22  | 0.17  | 25  | 0.25  |   |
| 1966 | Dab1            | 1.5 | 14  | 0.06  | 17  | 0.09  |   |
| 1967 | Dclre1c         | 1.5 | 34  | 0.76  | 38  | 1.14  |   |
| 1968 | Dennd6a         | 1.5 | 179 | 10.97 | 334 | 16.4  |   |
| 1969 | Dgkh            | 1.5 | 12  | 0.36  | 28  | 0.54  |   |
| 1970 | Dmc1            | 1.5 | 3   | 0.14  | 5   | 0.21  |   |
| 1971 | Dnm3            | 1.5 | 30  | 0.18  | 41  | 0.27  |   |
| 1972 | Dpysl4          | 1.5 | 1   | 0.14  | 2   | 0.21  |   |
| 1973 | Dscc1           | 1.5 | 18  | 1.37  | 28  | 2.05  |   |
| 1974 | Dtna            | 1.5 | 9   | 0.14  | 12  | 0.22  |   |
| 1975 | Duxbl1          | 1.5 | 6   | 0.18  | 8   | 0.27  |   |
| 1976 | Efhd1           | 1.5 | 2   | 0.2   | 3   | 0.3   |   |
| 1977 | Eif4e1b         | 1.5 | 1   | 0.49  | 2   | 0.73  |   |
| 1978 | ENSRNOG00000054 | 1.5 | 0   | 0.56  | 0   | 0.84  |   |
| 1979 | Eps8l2          | 1.5 | 2   | 0.11  | 3   | 0.17  |   |
| 1980 | Esf1            | 1.5 | 72  | 6.02  | 145 | 9     |   |
| 1981 | Fam150a         | 1.5 | 4   | 1.89  | 15  | 2.82  |   |
| 1982 | Fam19a2         | 1.5 | 6   | 0.14  | 5   | 0.21  |   |
| 1983 | Fam83h          | 1.5 | 57  | 3.5   | 98  | 5.23  |   |
| 1984 | Fbxl7           | 1.5 | 27  | 2.49  | 57  | 3.73  |   |
| 1985 | Ffar2           | 1.5 | 1   | 0.36  | 1   | 0.55  |   |

Supplemental Table 3  
 FSH + Ad-E versus FSH + Ad-FOXO1(A3), 24 hours

|      | A            | B   | C   | D     | E   | F     | G |
|------|--------------|-----|-----|-------|-----|-------|---|
| 1986 | Frk          | 1.5 | 63  | 4.12  | 118 | 6.16  |   |
| 1987 | Gap43        | 1.5 | 3   | 0.24  | 2   | 0.37  |   |
| 1988 | Gcgr         | 1.5 | 2   | 0.19  | 3   | 0.28  |   |
| 1989 | Gcnt2        | 1.5 | 4   | 0.06  | 7   | 0.09  |   |
| 1990 | Glr1b        | 1.5 | 6   | 0.29  | 8   | 0.44  |   |
| 1991 | Grhl1        | 1.5 | 6   | 0.46  | 14  | 0.69  |   |
| 1992 | Grin2c       | 1.5 | 1   | 0.08  | 4   | 0.12  |   |
| 1993 | Hbb          | 1.5 | 1   | 0.55  | 2   | 0.82  |   |
| 1994 | Hbb-b1       | 1.5 | 2   | 0.27  | 2   | 0.4   |   |
| 1995 | Heph         | 1.5 | 166 | 13.24 | 336 | 19.79 |   |
| 1996 | Hmgb3_1      | 1.5 | 1   | 2.15  | 3   | 3.21  |   |
| 1997 | Hnf1b        | 1.5 | 1   | 0.13  | 2   | 0.2   |   |
| 1998 | Hnrnpa3_2    | 1.5 | 0   | 0.34  | 1   | 0.51  |   |
| 1999 | Hrasls       | 1.5 | 2   | 0.12  | 3   | 0.18  |   |
| 2000 | Ifitm10      | 1.5 | 2   | 0.51  | 10  | 0.77  |   |
| 2001 | Il12a        | 1.5 | 2   | 0.25  | 3   | 0.37  |   |
| 2002 | Il13ra2      | 1.5 | 2   | 0.14  | 5   | 0.21  |   |
| 2003 | Iqcc         | 1.5 | 16  | 1.15  | 18  | 1.71  |   |
| 2004 | Kbtbd11      | 1.5 | 4   | 0.35  | 8   | 0.53  |   |
| 2005 | Kcnc3        | 1.5 | 7   | 0.19  | 8   | 0.28  |   |
| 2006 | Kcnj11       | 1.5 | 1   | 0.12  | 2   | 0.18  |   |
| 2007 | Klhl15       | 1.5 | 25  | 1.25  | 49  | 1.87  |   |
| 2008 | Knop1_1      | 1.5 | 0   | 0.32  | 0   | 0.47  |   |
| 2009 | Lcn12        | 1.5 | 12  | 0.79  | 13  | 1.18  |   |
| 2010 | Lif          | 1.5 | 3   | 0.49  | 6   | 0.73  |   |
| 2011 | LOC100359668 | 1.5 | 0   | 0.66  | 0   | 0.98  |   |
| 2012 | LOC100359912 | 1.5 | 0   | 0.16  | 0   | 0.23  |   |
| 2013 | LOC100360821 | 1.5 | 1   | 0.1   | 2   | 0.15  |   |
| 2014 | LOC100362999 | 1.5 | 0   | 0.23  | 0   | 0.34  |   |
| 2015 | LOC100364116 | 1.5 | 0   | 2.97  | 0   | 4.44  |   |
| 2016 | LOC102549817 | 1.5 | 35  | 0.4   | 51  | 0.6   |   |
| 2017 | LOC102553119 | 1.5 | 25  | 2.13  | 38  | 3.18  |   |
| 2018 | LOC679576    | 1.5 | 1   | 0.94  | 2   | 1.41  |   |
| 2019 | LOC682408    | 1.5 | 0   | 0.24  | 1   | 0.36  |   |
| 2020 | LOC690700    | 1.5 | 3   | 0.71  | 3   | 1.07  |   |
| 2021 | LOC691083    | 1.5 | 11  | 0.39  | 17  | 0.58  |   |
| 2022 | Lrrn4        | 1.5 | 1   | 0.14  | 2   | 0.21  |   |
| 2023 | Lyz2         | 1.5 | 4   | 1.83  | 7   | 2.73  |   |
| 2024 | Mnd1         | 1.5 | 6   | 0.59  | 5   | 0.88  |   |
| 2025 | Myo5b        | 1.5 | 12  | 0.09  | 12  | 0.14  |   |
| 2026 | Ncbp2_2      | 1.5 | 0   | 1.54  | 0   | 2.3   |   |
| 2027 | Ncs1         | 1.5 | 35  | 2.22  | 67  | 3.33  |   |
| 2028 | Nell2        | 1.5 | 9   | 0.11  | 6   | 0.16  |   |
| 2029 | Neu3         | 1.5 | 5   | 0.63  | 10  | 0.95  |   |
| 2030 | Nipal1       | 1.5 | 2   | 0.09  | 4   | 0.13  |   |
| 2031 | Nlrp4        | 1.5 | 1   | 0.1   | 2   | 0.15  |   |
| 2032 | Nrip3        | 1.5 | 12  | 0.94  | 21  | 1.4   |   |
| 2033 | Nudt6        | 1.5 | 15  | 1.36  | 18  | 2.04  |   |
| 2034 | Nxf2         | 1.5 | 3   | 0.5   | 6   | 0.75  |   |
| 2035 | Oas1d        | 1.5 | 0   | 0.66  | 0   | 0.99  |   |
| 2036 | Osbp2        | 1.5 | 3   | 0.09  | 5   | 0.14  |   |
| 2037 | Pcdhb14      | 1.5 | 4   | 0.76  | 10  | 1.13  |   |
| 2038 | Pfkfb1       | 1.5 | 3   | 0.18  | 14  | 0.27  |   |
| 2039 | Plcd4        | 1.5 | 5   | 0.13  | 6   | 0.19  |   |

Supplemental Table 3  
 FSH + Ad-E versus FSH + Ad-FOXO1(A3), 24 hours

|      | A              | B   | C   | D     | E   | F     | G |
|------|----------------|-----|-----|-------|-----|-------|---|
| 2040 | Plid5          | 1.5 | 23  | 0.3   | 25  | 0.45  |   |
| 2041 | Pold3          | 1.5 | 52  | 3.45  | 94  | 5.16  |   |
| 2042 | Pou3f4         | 1.5 | 3   | 0.85  | 6   | 1.27  |   |
| 2043 | Prrg4          | 1.5 | 1   | 0.19  | 3   | 0.29  |   |
| 2044 | Pspn           | 1.5 | 1   | 0.77  | 2   | 1.15  |   |
| 2045 | Ptger4         | 1.5 | 9   | 2.21  | 19  | 3.31  |   |
| 2046 | Ptp4a3         | 1.5 | 4   | 1.09  | 14  | 1.63  |   |
| 2047 | Ptprq          | 1.5 | 10  | 0.05  | 6   | 0.07  |   |
| 2048 | Rad51d         | 1.5 | 54  | 5.54  | 107 | 8.28  |   |
| 2049 | Rapgef4        | 1.5 | 14  | 0.48  | 37  | 0.71  |   |
| 2050 | Rasal3         | 1.5 | 1   | 0.09  | 3   | 0.14  |   |
| 2051 | Rasgrp1        | 1.5 | 6   | 0.3   | 13  | 0.45  |   |
| 2052 | Rdh14          | 1.5 | 14  | 1.55  | 26  | 2.32  |   |
| 2053 | RGD1304624     | 1.5 | 42  | 0.98  | 72  | 1.46  |   |
| 2054 | RGD1560860_2   | 1.5 | 1   | 0.21  | 1   | 0.31  |   |
| 2055 | RGD1561636     | 1.5 | 0   | 1.7   | 0   | 2.54  |   |
| 2056 | RGD1564463     | 1.5 | 4   | 0.21  | 2   | 0.31  |   |
| 2057 | Rgl3           | 1.5 | 4   | 0.08  | 3   | 0.12  |   |
| 2058 | Rhod           | 1.5 | 14  | 2.44  | 28  | 3.64  |   |
| 2059 | Ric3           | 1.5 | 28  | 0.18  | 17  | 0.27  |   |
| 2060 | Rn60_13_0801.2 | 1.5 | 2   | 0.38  | 2   | 0.56  |   |
| 2061 | Rn60_13_0841.1 | 1.5 | 1   | 0.96  | 2   | 1.44  |   |
| 2062 | Rn60_20_0058.5 | 1.5 | 0   | 0.9   | 3   | 1.35  |   |
| 2063 | Rpl31l3        | 1.5 | 1   | 0.96  | 2   | 1.43  |   |
| 2064 | RragB_1        | 1.5 | 0   | 1.85  | 0   | 2.76  |   |
| 2065 | Rtn4r          | 1.5 | 13  | 1.69  | 24  | 2.53  |   |
| 2066 | Ryr1           | 1.5 | 36  | 0.02  | 20  | 0.04  |   |
| 2067 | Samd15         | 1.5 | 4   | 0.19  | 9   | 0.29  |   |
| 2068 | Slc20a2        | 1.5 | 168 | 4.76  | 266 | 7.12  |   |
| 2069 | Slc22a1        | 1.5 | 5   | 0.19  | 2   | 0.29  |   |
| 2070 | Slc27a2        | 1.5 | 7   | 0.24  | 7   | 0.37  |   |
| 2071 | Slc38a6        | 1.5 | 28  | 0.94  | 60  | 1.4   |   |
| 2072 | snoR38_1       | 1.5 | 4   | 23.82 | 10  | 35.62 |   |
| 2073 | SNORA16_1      | 1.5 | 0   | 10.65 | 0   | 15.92 |   |
| 2074 | SNORA44_18     | 1.5 | 0   | 8.42  | 0   | 12.59 |   |
| 2075 | SNORD41        | 1.5 | 0   | 5.17  | 0   | 7.73  |   |
| 2076 | SNORD56        | 1.5 | 0   | 10.34 | 0   | 15.47 |   |
| 2077 | SNORD60        | 1.5 | 0   | 8.72  | 0   | 13.05 |   |
| 2078 | SNORD95_2      | 1.5 | 0   | 5.32  | 0   | 7.96  |   |
| 2079 | SNORND104_2    | 1.5 | 3   | 15.52 | 6   | 23.2  |   |
| 2080 | Snrpe          | 1.5 | 11  | 17.32 | 23  | 25.9  |   |
| 2081 | Sorcs1         | 1.5 | 14  | 0.09  | 14  | 0.14  |   |
| 2082 | Spaca5         | 1.5 | 5   | 0.65  | 14  | 0.98  |   |
| 2083 | Spop           | 1.5 | 116 | 9.62  | 210 | 14.38 |   |
| 2084 | Spry4          | 1.5 | 8   | 0.46  | 14  | 0.68  |   |
| 2085 | Sstr1          | 1.5 | 1   | 0.09  | 2   | 0.14  |   |
| 2086 | Stard3nl       | 1.5 | 69  | 12.69 | 124 | 18.97 |   |
| 2087 | Stau2          | 1.5 | 80  | 6.13  | 140 | 9.17  |   |
| 2088 | Stk26          | 1.5 | 2   | 0.11  | 2   | 0.16  |   |
| 2089 | Syce2          | 1.5 | 14  | 0.48  | 12  | 0.72  |   |
| 2090 | Syne3          | 1.5 | 23  | 0.83  | 39  | 1.24  |   |
| 2091 | Tmem106a       | 1.5 | 12  | 1.83  | 24  | 2.73  |   |
| 2092 | Tmem74         | 1.5 | 1   | 0.39  | 2   | 0.59  |   |
| 2093 | Tmem81         | 1.5 | 7   | 0.89  | 12  | 1.33  |   |

Supplemental Table 3  
 FSH + Ad-E versus FSH + Ad-FOXO1(A3), 24 hours

|      | A              | B   | C   | D     | E   | F     | G |
|------|----------------|-----|-----|-------|-----|-------|---|
| 2094 | Tmod3          | 1.5 | 110 | 20.33 | 234 | 30.4  |   |
| 2095 | Tmprss9        | 1.5 | 3   | 0.1   | 7   | 0.15  |   |
| 2096 | Tprkb_1        | 1.5 | 3   | 2.23  | 7   | 3.33  |   |
| 2097 | Trhde          | 1.5 | 14  | 0.11  | 17  | 0.16  |   |
| 2098 | Ttc30a1        | 1.5 | 1   | 0.3   | 4   | 0.44  |   |
| 2099 | Ttll3          | 1.5 | 15  | 0.16  | 26  | 0.24  |   |
| 2100 | Ube2ql1        | 1.5 | 15  | 1.5   | 31  | 2.24  |   |
| 2101 | Ube2t          | 1.5 | 5   | 0.59  | 2   | 0.88  |   |
| 2102 | Utf1           | 1.5 | 3   | 1.05  | 6   | 1.58  |   |
| 2103 | Vtcn1          | 1.5 | 2   | 0.08  | 3   | 0.12  |   |
| 2104 | Wbscr17        | 1.5 | 22  | 0.38  | 33  | 0.57  |   |
| 2105 | Wee1           | 1.5 | 34  | 3.21  | 74  | 4.79  |   |
| 2106 | Wee2           | 1.5 | 12  | 0.22  | 21  | 0.32  |   |
| 2107 | Wisp1          | 1.5 | 2   | 0.07  | 2   | 0.11  |   |
| 2108 | Zdhhc14        | 1.5 | 14  | 0.24  | 26  | 0.36  |   |
| 2109 | Zfp182         | 1.5 | 14  | 2.13  | 30  | 3.19  |   |
| 2110 | Zfp300         | 1.5 | 3   | 0.49  | 6   | 0.73  |   |
| 2111 | Zfp551         | 1.5 | 6   | 0.5   | 12  | 0.75  |   |
| 2112 | Zfp628         | 1.5 | 37  | 3.55  | 68  | 5.31  |   |
| 2113 | Zfp93          | 1.5 | 3   | 0.17  | 4   | 0.26  |   |
| 2114 | Zkscan4        | 1.5 | 8   | 2.44  | 15  | 3.65  |   |
| 2115 | AABR07002910.1 | 1.5 | 3   | 0.34  | 6   | 0.51  |   |
| 2116 | AABR07003187.2 | 1.5 | 1   | 0.33  | 1   | 0.49  |   |
| 2117 | AABR07005779.3 | 1.5 | 1   | 0.25  | 2   | 0.38  |   |
| 2118 | AABR07006889.1 | 1.5 | 1   | 0.18  | 1   | 0.26  |   |
| 2119 | AABR07012054.1 | 1.5 | 4   | 1.79  | 8   | 2.67  |   |
| 2120 | AABR07020537.1 | 1.5 | 1   | 0.07  | 2   | 0.11  |   |
| 2121 | AABR07024457.1 | 1.5 | 4   | 0.41  | 10  | 0.61  |   |
| 2122 | AABR07026359.1 | 1.5 | 0   | 0.39  | 0   | 0.58  |   |
| 2123 | AABR07041724.1 | 1.5 | 1   | 1.72  | 2   | 2.58  |   |
| 2124 | AABR07049038.1 | 1.5 | 3   | 2.06  | 4   | 3.08  |   |
| 2125 | AABR07054983.2 | 1.5 | 3   | 0.85  | 6   | 1.27  |   |
| 2126 | AABR07055191.1 | 1.5 | 16  | 0.43  | 34  | 0.65  |   |
| 2127 | AABR07056330.1 | 1.5 | 2   | 0.34  | 2   | 0.5   |   |
| 2128 | AABR07071101.1 | 1.5 | 1   | 0.36  | 2   | 0.54  |   |
| 2129 | AC133270.1     | 1.5 | 29  | 12.26 | 51  | 18.33 |   |
| 2130 | Acyp1          | 1.5 | 6   | 2.06  | 19  | 3.08  |   |
| 2131 | Adam12         | 1.5 | 15  | 0.12  | 14  | 0.18  |   |
| 2132 | Aifm3          | 1.5 | 2   | 0.15  | 4   | 0.23  |   |
| 2133 | Alx4           | 1.5 | 8   | 0.21  | 10  | 0.31  |   |
| 2134 | Amt            | 1.5 | 7   | 0.6   | 9   | 0.89  |   |
| 2135 | Anlnl1         | 1.5 | 0   | 0.12  | 0   | 0.19  |   |
| 2136 | Armc2          | 1.5 | 8   | 0.29  | 14  | 0.44  |   |
| 2137 | Arx            | 1.5 | 3   | 0.38  | 7   | 0.57  |   |
| 2138 | Atl3           | 1.5 | 145 | 17.02 | 280 | 25.45 |   |
| 2139 | Btc            | 1.5 | 5   | 0.44  | 8   | 0.66  |   |
| 2140 | Btnl5_1        | 1.5 | 1   | 0.17  | 1   | 0.25  |   |
| 2141 | Btnl7_2        | 1.5 | 0   | 0.17  | 0   | 0.26  |   |
| 2142 | Ccdc167        | 1.5 | 17  | 1.19  | 23  | 1.78  |   |
| 2143 | Ccdc89         | 1.5 | 0   | 0.65  | 0   | 0.97  |   |
| 2144 | Cd83           | 1.5 | 10  | 1.2   | 18  | 1.79  |   |
| 2145 | Cdk5r1         | 1.5 | 1   | 0.3   | 2   | 0.45  |   |
| 2146 | Celf3          | 1.5 | 8   | 0.25  | 9   | 0.38  |   |
| 2147 | Chst9          | 1.5 | 8   | 0.41  | 15  | 0.61  |   |



Supplemental Table 3  
 FSH + Ad-E versus FSH + Ad-FOXO1(A3), 24 hours

|      | A              | B   | C    | D     | E    | F     | G |
|------|----------------|-----|------|-------|------|-------|---|
| 2148 | Clnn           | 1.5 | 10   | 0.15  | 11   | 0.23  |   |
| 2149 | Col15a1        | 1.5 | 0    | 0.09  | 0    | 0.14  |   |
| 2150 | Colec10        | 1.5 | 2    | 0.16  | 9    | 0.24  |   |
| 2151 | Cpm            | 1.5 | 5    | 0.13  | 10   | 0.2   |   |
| 2152 | Crb1           | 1.5 | 6    | 0.08  | 8    | 0.12  |   |
| 2153 | Ddn            | 1.5 | 1    | 0.1   | 2    | 0.15  |   |
| 2154 | Dnmt3b         | 1.5 | 13   | 0.44  | 22   | 0.66  |   |
| 2155 | Ebf1           | 1.5 | 13   | 0.11  | 9    | 0.16  |   |
| 2156 | Esrp2          | 1.5 | 3    | 0.27  | 5    | 0.41  |   |
| 2157 | Exosc6         | 1.5 | 4    | 1.77  | 8    | 2.64  |   |
| 2158 | Fam122a        | 1.5 | 0    | 0.28  | 0    | 0.41  |   |
| 2159 | Fam178a        | 1.5 | 212  | 8     | 379  | 11.97 |   |
| 2160 | Fam189a1       | 1.5 | 70   | 0.23  | 99   | 0.35  |   |
| 2161 | Fau            | 1.5 | 0    | 0.9   | 0    | 1.35  |   |
| 2162 | Fbxw10         | 1.5 | 3    | 0.12  | 3    | 0.17  |   |
| 2163 | Fez1           | 1.5 | 5    | 0.22  | 4    | 0.32  |   |
| 2164 | Fosb           | 1.5 | 2    | 0.19  | 4    | 0.29  |   |
| 2165 | Fscn3          | 1.5 | 3    | 0.2   | 2    | 0.3   |   |
| 2166 | Fsip2          | 1.5 | 3    | 0.02  | 3    | 0.03  |   |
| 2167 | Glt8d2         | 1.5 | 5    | 0.69  | 6    | 1.03  |   |
| 2168 | Gmpr           | 1.5 | 13   | 1.52  | 21   | 2.27  |   |
| 2169 | Gstm6l_1       | 1.5 | 1    | 0.3   | 2    | 0.45  |   |
| 2170 | Hmgb2l1        | 1.5 | 0    | 1.14  | 0    | 1.71  |   |
| 2171 | Hmgn5          | 1.5 | 0    | 0.55  | 0    | 0.83  |   |
| 2172 | Hspb2          | 1.5 | 1    | 0.66  | 4    | 0.99  |   |
| 2173 | Il17rd         | 1.5 | 5    | 0.22  | 15   | 0.33  |   |
| 2174 | Il1rl1         | 1.5 | 2    | 0.1   | 2    | 0.15  |   |
| 2175 | Iqcb1          | 1.5 | 38   | 3.31  | 90   | 4.95  |   |
| 2176 | Iqcg           | 1.5 | 94   | 0.12  | 137  | 0.19  |   |
| 2177 | Ilgam          | 1.5 | 1144 | 0.05  | 1132 | 0.07  |   |
| 2178 | Kcnd3          | 1.5 | 24   | 0.74  | 63   | 1.11  |   |
| 2179 | Lcn2           | 1.5 | 2    | 0.81  | 4    | 1.22  |   |
| 2180 | LOC100302465   | 1.5 | 6    | 0.12  | 7    | 0.18  |   |
| 2181 | LOC100909911_2 | 1.5 | 0    | 1.01  | 0    | 1.5   |   |
| 2182 | LOC100910531   | 1.5 | 24   | 1.22  | 53   | 1.83  |   |
| 2183 | LOC100912024   | 1.5 | 0    | 5.56  | 0    | 8.31  |   |
| 2184 | LOC24906       | 1.5 | 1    | 0.19  | 2    | 0.29  |   |
| 2185 | LOC498368      | 1.5 | 2    | 0.28  | 4    | 0.42  |   |
| 2186 | LOC501406      | 1.5 | 4    | 1.2   | 11   | 1.8   |   |
| 2187 | LOC686807      | 1.5 | 1    | 1.27  | 2    | 1.91  |   |
| 2188 | LOC688765      | 1.5 | 11   | 2.1   | 22   | 3.14  |   |
| 2189 | LOC689986      | 1.5 | 4    | 0.62  | 7    | 0.92  |   |
| 2190 | LOC691113      | 1.5 | 2    | 0.81  | 4    | 1.21  |   |
| 2191 | Loxl1          | 1.5 | 3    | 0.26  | 5    | 0.39  |   |
| 2192 | Ltbp4          | 1.5 | 6    | 0.34  | 10   | 0.51  |   |
| 2193 | Lzts1          | 1.5 | 8    | 0.51  | 18   | 0.76  |   |
| 2194 | Mafa           | 1.5 | 1    | 0.33  | 2    | 0.5   |   |
| 2195 | Masp2          | 1.5 | 59   | 1.61  | 81   | 2.41  |   |
| 2196 | Mboat7         | 1.5 | 0    | 0.25  | 0    | 0.38  |   |
| 2197 | Mettl2b        | 1.5 | 63   | 2.46  | 110  | 3.67  |   |
| 2198 | Mff_1          | 1.5 | 0    | 1.14  | 0    | 1.7   |   |
| 2199 | MGC105649      | 1.5 | 2    | 0.31  | 2    | 0.47  |   |
| 2200 | MGC109340_2    | 1.5 | 0    | 1.33  | 0    | 1.99  |   |
| 2201 | Mrps23         | 1.5 | 58   | 12.03 | 99   | 17.99 |   |

Supplemental Table 3  
 FSH + Ad-E versus FSH + Ad-FOXO1(A3), 24 hours

|      | A              | B   | C  | D     | E   | F     | G |
|------|----------------|-----|----|-------|-----|-------|---|
| 2202 | Msantd1        | 1.5 | 2  | 0.07  | 4   | 0.11  |   |
| 2203 | N4bp2l1        | 1.5 | 16 | 0.85  | 14  | 1.27  |   |
| 2204 | Nadk2          | 1.5 | 53 | 2.96  | 88  | 4.42  |   |
| 2205 | Nfkbiz         | 1.5 | 14 | 0.63  | 24  | 0.94  |   |
| 2206 | Nipal4         | 1.5 | 1  | 0.11  | 2   | 0.17  |   |
| 2207 | Nlrp4b         | 1.5 | 1  | 0.25  | 1   | 0.37  |   |
| 2208 | Nqo2           | 1.5 | 4  | 1.06  | 14  | 1.58  |   |
| 2209 | Nyap2          | 1.5 | 5  | 0.12  | 8   | 0.19  |   |
| 2210 | Pagr1          | 1.5 | 10 | 4.75  | 15  | 7.1   |   |
| 2211 | Pcdhb15        | 1.5 | 1  | 0.15  | 2   | 0.23  |   |
| 2212 | Pcdhb21        | 1.5 | 1  | 0.12  | 2   | 0.19  |   |
| 2213 | Pdcd2l         | 1.5 | 25 | 4.99  | 49  | 7.46  |   |
| 2214 | Pgr            | 1.5 | 9  | 0.12  | 15  | 0.18  |   |
| 2215 | Plekha4        | 1.5 | 6  | 0.36  | 10  | 0.54  |   |
| 2216 | Plscr1         | 1.5 | 6  | 0.41  | 11  | 0.62  |   |
| 2217 | Pnlcd1         | 1.5 | 6  | 0.17  | 5   | 0.25  |   |
| 2218 | Ppm1e          | 1.5 | 22 | 0.4   | 48  | 0.59  |   |
| 2219 | Ppp1r14a       | 1.5 | 6  | 1.46  | 8   | 2.18  |   |
| 2220 | Rab11fip2      | 1.5 | 30 | 2.69  | 44  | 4.03  |   |
| 2221 | Rab32          | 1.5 | 21 | 2.02  | 38  | 3.02  |   |
| 2222 | Rala           | 1.5 | 44 | 12.65 | 95  | 18.92 |   |
| 2223 | Rd3            | 1.5 | 1  | 0.23  | 3   | 0.34  |   |
| 2224 | Ret            | 1.5 | 3  | 0.13  | 5   | 0.19  |   |
| 2225 | RGD1311558     | 1.5 | 39 | 3.65  | 75  | 5.46  |   |
| 2226 | RGD1312005     | 1.5 | 7  | 1.2   | 14  | 1.8   |   |
| 2227 | RGD1559864     | 1.5 | 4  | 0.19  | 5   | 0.29  |   |
| 2228 | RGD1560831     | 1.5 | 2  | 0.99  | 4   | 1.49  |   |
| 2229 | RGD1561551     | 1.5 | 1  | 0.39  | 2   | 0.58  |   |
| 2230 | RGD1562381     | 1.5 | 1  | 0.86  | 1   | 1.29  |   |
| 2231 | RGD1565472     | 1.5 | 0  | 0.75  | 0   | 1.12  |   |
| 2232 | RGD1566369     | 1.5 | 0  | 0.58  | 0   | 0.86  |   |
| 2233 | Rhox5          | 1.5 | 0  | 0.57  | 0   | 0.85  |   |
| 2234 | Rn60_14_0866.3 | 1.5 | 0  | 0.91  | 2   | 1.35  |   |
| 2235 | Rn60_16_0001.1 | 1.5 | 1  | 0.43  | 2   | 0.64  |   |
| 2236 | Rpl39_3        | 1.5 | 0  | 9.28  | 0   | 13.88 |   |
| 2237 | Rpl39_6        | 1.5 | 0  | 9.28  | 0   | 13.88 |   |
| 2238 | Rps15a2        | 1.5 | 0  | 0.92  | 1   | 1.38  |   |
| 2239 | SCARNA16_4     | 1.5 | 1  | 1.97  | 2   | 2.94  |   |
| 2240 | Scn3a          | 1.5 | 2  | 0.11  | 3   | 0.16  |   |
| 2241 | Slc12a8        | 1.5 | 6  | 0.14  | 12  | 0.21  |   |
| 2242 | Slc24a2        | 1.5 | 8  | 0.04  | 11  | 0.06  |   |
| 2243 | Slc35b3        | 1.5 | 77 | 3.6   | 107 | 5.39  |   |
| 2244 | Slc4a10        | 1.5 | 9  | 0.06  | 9   | 0.09  |   |
| 2245 | Slc7a3         | 1.5 | 1  | 0.12  | 2   | 0.18  |   |
| 2246 | snoR38_2       | 1.5 | 1  | 4.76  | 2   | 7.12  |   |
| 2247 | SNORA43_6      | 1.5 | 15 | 59.89 | 36  | 89.55 |   |
| 2248 | SNORA44_25     | 1.5 | 0  | 5.61  | 0   | 8.39  |   |
| 2249 | SNORD14_2      | 1.5 | 0  | 8.52  | 0   | 12.74 |   |
| 2250 | SNORD77_1      | 1.5 | 0  | 23.51 | 0   | 35.15 |   |
| 2251 | SNORD88_2      | 1.5 | 1  | 3.98  | 2   | 5.95  |   |
| 2252 | Sphkap         | 1.5 | 3  | 0.1   | 8   | 0.15  |   |
| 2253 | Ssmem1         | 1.5 | 4  | 0.21  | 4   | 0.32  |   |
| 2254 | Stard6         | 1.5 | 8  | 0.51  | 14  | 0.76  |   |
| 2255 | Tesc           | 1.5 | 6  | 0.56  | 16  | 0.84  |   |

Supplemental Table 3  
 FSH + Ad-E versus FSH + Ad-FOXO1(A3), 24 hours

|      | A              | B    | C    | D     | E    | F      | G |
|------|----------------|------|------|-------|------|--------|---|
| 2256 | Tg             | 1.5  | 4    | 0.04  | 3    | 0.06   |   |
| 2257 | Tjp3           | 1.5  | 6    | 0.16  | 7    | 0.24   |   |
| 2258 | Tmem255b       | 1.5  | 1    | 0.36  | 3    | 0.54   |   |
| 2259 | Tmem45a        | 1.5  | 0    | 0.9   | 1    | 1.34   |   |
| 2260 | Tspan8         | 1.5  | 2    | 0.31  | 4    | 0.46   |   |
| 2261 | Tstd1          | 1.5  | 1    | 0.9   | 6    | 1.35   |   |
| 2262 | Vps37a         | 1.5  | 79   | 9.71  | 144  | 14.52  |   |
| 2263 | Zmym5          | 1.5  | 88   | 11.9  | 167  | 17.79  |   |
| 2264 | Sept7          | 1.49 | 118  | 20.73 | 224  | 30.88  |   |
| 2265 | Bmp2k          | 1.49 | 163  | 13.51 | 300  | 20.12  |   |
| 2266 | Kif13b         | 1.49 | 180  | 7.08  | 344  | 10.53  |   |
| 2267 | Bcor1          | 1.49 | 115  | 5.45  | 222  | 8.1    |   |
| 2268 | Iqgap1         | 1.49 | 572  | 31.72 | 1119 | 47.16  |   |
| 2269 | Iws1           | 1.49 | 118  | 9.49  | 195  | 14.1   |   |
| 2270 | Cyld           | 1.48 | 69   | 7.12  | 134  | 10.56  |   |
| 2271 | Phf14          | 1.48 | 234  | 9.6   | 419  | 14.24  |   |
| 2272 | Plekhg2        | 1.48 | 152  | 10.04 | 300  | 14.91  |   |
| 2273 | Map2           | 1.48 | 94   | 4     | 200  | 5.93   |   |
| 2274 | Krcc1          | 1.48 | 97   | 14.59 | 189  | 21.65  |   |
| 2275 | Abca9          | 1.48 | 75   | 4.83  | 169  | 7.16   |   |
| 2276 | Col4a5         | 1.48 | 470  | 24.42 | 947  | 36.22  |   |
| 2277 | Epas1          | 1.48 | 1053 | 74.81 | 2094 | 110.86 |   |
| 2278 | Flnb           | 1.48 | 520  | 18.95 | 1060 | 28.07  |   |
| 2279 | Hmox2          | 1.48 | 88   | 9.68  | 179  | 14.33  |   |
| 2280 | Cdkn2aip       | 1.48 | 53   | 8.19  | 106  | 12.13  |   |
| 2281 | Sestd1         | 1.48 | 144  | 13.57 | 278  | 20.1   |   |
| 2282 | Trio           | 1.48 | 363  | 10.99 | 677  | 16.25  |   |
| 2283 | Frg1           | 1.48 | 50   | 14.64 | 78   | 21.65  |   |
| 2284 | AABR07002779.1 | 1.48 | 58   | 26.55 | 70   | 39.25  |   |
| 2285 | Zfp322a        | 1.48 | 63   | 5.08  | 116  | 7.51   |   |
| 2286 | Avl9           | 1.48 | 55   | 6.38  | 129  | 9.43   |   |
| 2287 | Myo9a          | 1.48 | 178  | 5.45  | 336  | 8.05   |   |
| 2288 | AABR07028981.1 | 1.48 | 0    | 10.4  | 0    | 15.35  |   |
| 2289 | Jam3           | 1.48 | 115  | 15.4  | 209  | 22.74  |   |
| 2290 | AABR07027575.1 | 1.48 | 84   | 75.07 | 158  | 110.83 |   |
| 2291 | Ccdc25         | 1.48 | 47   | 6.59  | 104  | 9.73   |   |
| 2292 | Twistnb        | 1.48 | 40   | 3.97  | 77   | 5.86   |   |
| 2293 | Rpia           | 1.48 | 43   | 7.79  | 97   | 11.5   |   |
| 2294 | Frmf6          | 1.48 | 88   | 6.03  | 176  | 8.9    |   |
| 2295 | Ndufa5         | 1.48 | 50   | 24.54 | 94   | 36.19  |   |
| 2296 | Epc2           | 1.47 | 67   | 6.97  | 134  | 10.28  |   |
| 2297 | Ubal1_2        | 1.47 | 26   | 9.63  | 43   | 14.19  |   |
| 2298 | Vat1           | 1.47 | 590  | 76.82 | 1231 | 113.21 |   |
| 2299 | Ktn1           | 1.47 | 281  | 15.4  | 543  | 22.69  |   |
| 2300 | Cinp           | 1.47 | 70   | 8.37  | 123  | 12.34  |   |
| 2301 | Lrch3          | 1.47 | 31   | 5.17  | 61   | 7.62   |   |
| 2302 | Akap1          | 1.47 | 114  | 9.84  | 217  | 14.49  |   |
| 2303 | Snrnp70        | 1.47 | 512  | 38.94 | 909  | 57.33  |   |
| 2304 | Mex3a          | 1.47 | 33   | 9.17  | 74   | 13.5   |   |
| 2305 | Rnf219         | 1.47 | 38   | 3.07  | 79   | 4.52   |   |
| 2306 | Scyl3          | 1.47 | 57   | 3.91  | 87   | 5.75   |   |
| 2307 | Upf2           | 1.47 | 114  | 6.07  | 201  | 8.93   |   |
| 2308 | Stim2          | 1.47 | 147  | 10.14 | 287  | 14.92  |   |
| 2309 | Map2k4         | 1.47 | 69   | 10.06 | 133  | 14.8   |   |

Supplemental Table 3  
 FSH + Ad-E versus FSH + Ad-FOXO1(A3), 24 hours

|      | A              | B    | C   | D      | E    | F      | G |
|------|----------------|------|-----|--------|------|--------|---|
| 2310 | Rpl39_7        | 1.47 | 18  | 220.08 | 19   | 323.77 |   |
| 2311 | Ptma_2         | 1.47 | 11  | 14.65  | 16   | 21.56  |   |
| 2312 | Rcn1           | 1.47 | 159 | 44.78  | 350  | 65.84  |   |
| 2313 | Ankrd11        | 1.47 | 979 | 34.62  | 1925 | 50.89  |   |
| 2314 | Vldlr          | 1.47 | 276 | 27.76  | 535  | 40.8   |   |
| 2315 | Kcnk2          | 1.47 | 89  | 5.67   | 185  | 8.34   |   |
| 2316 | LOC100361830   | 1.47 | 123 | 21.9   | 237  | 32.16  |   |
| 2317 | Pqlc2          | 1.47 | 37  | 1.87   | 62   | 2.75   |   |
| 2318 | Taok3          | 1.47 | 51  | 3.49   | 110  | 5.13   |   |
| 2319 | Cpne3          | 1.47 | 128 | 14.34  | 241  | 21.05  |   |
| 2320 | Sumo1          | 1.47 | 173 | 43.8   | 330  | 64.28  |   |
| 2321 | Frmf3          | 1.47 | 230 | 4.83   | 342  | 7.08   |   |
| 2322 | Rbms3          | 1.47 | 421 | 13.11  | 926  | 19.24  |   |
| 2323 | Atxn3          | 1.47 | 58  | 3.07   | 115  | 4.5    |   |
| 2324 | Hs1bp3         | 1.47 | 58  | 6.2    | 117  | 9.09   |   |
| 2325 | Rab11fip3      | 1.47 | 123 | 9.3    | 248  | 13.63  |   |
| 2326 | Slc31a1        | 1.47 | 74  | 12.78  | 121  | 18.73  |   |
| 2327 | Setx           | 1.46 | 227 | 7.66   | 450  | 11.22  |   |
| 2328 | Npap60_2       | 1.46 | 95  | 11.63  | 190  | 17.02  |   |
| 2329 | Ift74          | 1.46 | 35  | 4.12   | 82   | 6.04   |   |
| 2330 | Tdrd3          | 1.46 | 73  | 4.58   | 129  | 6.7    |   |
| 2331 | Fam118a        | 1.46 | 34  | 3.02   | 62   | 4.42   |   |
| 2332 | Actr2          | 1.46 | 150 | 25.15  | 274  | 36.79  |   |
| 2333 | Btf3           | 1.46 | 140 | 136.98 | 256  | 200.39 |   |
| 2334 | Hook1          | 1.46 | 33  | 1.52   | 58   | 2.22   |   |
| 2335 | Anapc10        | 1.46 | 39  | 4.5    | 62   | 6.58   |   |
| 2336 | Wnk3           | 1.46 | 30  | 1.47   | 58   | 2.14   |   |
| 2337 | Sipa1          | 1.46 | 23  | 2.31   | 46   | 3.37   |   |
| 2338 | Kctd18         | 1.46 | 121 | 5.34   | 225  | 7.8    |   |
| 2339 | Dek            | 1.46 | 115 | 12.21  | 201  | 17.83  |   |
| 2340 | Mecp2          | 1.46 | 75  | 8.78   | 145  | 12.82  |   |
| 2341 | LOC500028      | 1.46 | 76  | 8.86   | 143  | 12.93  |   |
| 2342 | Etaa1l1        | 1.46 | 42  | 4.66   | 82   | 6.81   |   |
| 2343 | Xpc            | 1.46 | 165 | 10.36  | 274  | 15.13  |   |
| 2344 | Slc35f5        | 1.46 | 95  | 8.27   | 176  | 12.06  |   |
| 2345 | Exoc1          | 1.46 | 137 | 8.7    | 244  | 12.69  |   |
| 2346 | Bbx            | 1.46 | 151 | 11.38  | 273  | 16.6   |   |
| 2347 | Cd82           | 1.46 | 22  | 4      | 46   | 5.83   |   |
| 2348 | Med21          | 1.46 | 33  | 9.12   | 49   | 13.3   |   |
| 2349 | Nanp           | 1.46 | 28  | 5.47   | 62   | 7.97   |   |
| 2350 | Cstf3          | 1.46 | 93  | 4.71   | 174  | 6.86   |   |
| 2351 | Snx4           | 1.46 | 229 | 17.48  | 443  | 25.47  |   |
| 2352 | Tro            | 1.46 | 106 | 7.98   | 183  | 11.62  |   |
| 2353 | Osbpl11        | 1.46 | 150 | 10.31  | 304  | 15.02  |   |
| 2354 | Cltb           | 1.46 | 47  | 13.14  | 93   | 19.13  |   |
| 2355 | AABR07024972.1 | 1.46 | 19  | 8.37   | 37   | 12.18  |   |
| 2356 | Abhd1          | 1.46 | 13  | 1.34   | 19   | 1.95   |   |
| 2357 | Ppm1d          | 1.46 | 85  | 7.09   | 177  | 10.33  |   |
| 2358 | Pragmin        | 1.46 | 44  | 2.89   | 86   | 4.21   |   |
| 2359 | Fam8a1         | 1.46 | 33  | 5.96   | 60   | 8.67   |   |
| 2360 | Sh3bp4         | 1.46 | 266 | 17.43  | 547  | 25.36  |   |
| 2361 | Srgap2         | 1.46 | 164 | 7.78   | 317  | 11.32  |   |
| 2362 | Map1s          | 1.46 | 101 | 7.95   | 210  | 11.57  |   |
| 2363 | Dpy19l1        | 1.45 | 228 | 15.68  | 438  | 22.81  |   |

Supplemental Table 3  
 FSH + Ad-E versus FSH + Ad-FOXO1(A3), 24 hours

|      | A              | B    | C   | D      | E    | F      | G |
|------|----------------|------|-----|--------|------|--------|---|
| 2364 | Dis3           | 1.45 | 69  | 4.93   | 124  | 7.16   |   |
| 2365 | Fam46a         | 1.45 | 55  | 6.38   | 109  | 9.27   |   |
| 2366 | Syncrip        | 1.45 | 308 | 16.79  | 540  | 24.41  |   |
| 2367 | Abcc5          | 1.45 | 60  | 4.27   | 106  | 6.2    |   |
| 2368 | Cep57          | 1.45 | 52  | 5.07   | 92   | 7.36   |   |
| 2369 | Rbm8a          | 1.45 | 88  | 21.2   | 176  | 30.79  |   |
| 2370 | Hipk2          | 1.45 | 187 | 10.37  | 383  | 15.07  |   |
| 2371 | Smek2          | 1.45 | 181 | 11.27  | 344  | 16.36  |   |
| 2372 | Psmb7          | 1.45 | 266 | 51.24  | 508  | 74.38  |   |
| 2373 | Adgra2         | 1.45 | 187 | 15.35  | 411  | 22.27  |   |
| 2374 | Recql4         | 1.45 | 11  | 1.02   | 15   | 1.48   |   |
| 2375 | AABR07058886.1 | 1.45 | 53  | 14.07  | 102  | 20.41  |   |
| 2376 | Ift88          | 1.45 | 82  | 3.83   | 127  | 5.56   |   |
| 2377 | Shroom4        | 1.45 | 125 | 4.28   | 254  | 6.2    |   |
| 2378 | Smc3           | 1.45 | 199 | 13.26  | 361  | 19.23  |   |
| 2379 | Col12a1        | 1.45 | 273 | 8.37   | 541  | 12.13  |   |
| 2380 | Chmp2a         | 1.45 | 57  | 19.35  | 109  | 28.04  |   |
| 2381 | Hecw1          | 1.45 | 135 | 3.03   | 251  | 4.39   |   |
| 2382 | Trpm7          | 1.45 | 236 | 10.26  | 416  | 14.87  |   |
| 2383 | Bbs7           | 1.45 | 54  | 4.01   | 100  | 5.81   |   |
| 2384 | Slc4a4         | 1.45 | 31  | 1.25   | 64   | 1.82   |   |
| 2385 | Ddx42          | 1.45 | 413 | 28.66  | 757  | 41.46  |   |
| 2386 | Vps4b          | 1.45 | 129 | 15.52  | 257  | 22.45  |   |
| 2387 | Cobl           | 1.45 | 79  | 2.96   | 137  | 4.28   |   |
| 2388 | Ift43          | 1.45 | 42  | 6.51   | 80   | 9.41   |   |
| 2389 | Ccser2         | 1.45 | 70  | 3.69   | 109  | 5.34   |   |
| 2390 | Snx24          | 1.45 | 53  | 2.48   | 124  | 3.59   |   |
| 2391 | Flot1          | 1.44 | 118 | 15.75  | 224  | 22.76  |   |
| 2392 | Rbm17          | 1.44 | 92  | 17.77  | 167  | 25.67  |   |
| 2393 | Utp6           | 1.44 | 53  | 8.91   | 109  | 12.87  |   |
| 2394 | Nek4           | 1.44 | 38  | 3.67   | 71   | 5.3    |   |
| 2395 | Pi4k2b         | 1.44 | 62  | 6.12   | 102  | 8.84   |   |
| 2396 | Nolc1          | 1.44 | 166 | 15.95  | 316  | 23.02  |   |
| 2397 | Athl1          | 1.44 | 50  | 6.72   | 94   | 9.7    |   |
| 2398 | Trak2          | 1.44 | 267 | 12.89  | 523  | 18.61  |   |
| 2399 | Chm            | 1.44 | 55  | 4.45   | 107  | 6.42   |   |
| 2400 | Ywhah          | 1.44 | 339 | 55.2   | 637  | 79.63  |   |
| 2401 | Cdca7          | 1.44 | 13  | 2.18   | 29   | 3.14   |   |
| 2402 | Skap2          | 1.44 | 23  | 3.11   | 51   | 4.49   |   |
| 2403 | Tbk1           | 1.44 | 86  | 5.09   | 179  | 7.34   |   |
| 2404 | Shpk           | 1.44 | 19  | 1.69   | 34   | 2.44   |   |
| 2405 | Snx25          | 1.44 | 34  | 3.64   | 70   | 5.25   |   |
| 2406 | Zfyve16        | 1.44 | 120 | 6.11   | 216  | 8.81   |   |
| 2407 | Rhoa           | 1.44 | 822 | 185.15 | 1593 | 266.93 |   |
| 2408 | Zfp655         | 1.44 | 109 | 11.32  | 209  | 16.32  |   |
| 2409 | Ctif           | 1.44 | 263 | 10.28  | 529  | 14.81  |   |
| 2410 | Zdhhc20        | 1.44 | 120 | 12.69  | 221  | 18.29  |   |
| 2411 | Dcaf6          | 1.44 | 206 | 14.75  | 349  | 21.25  |   |
| 2412 | Eea1           | 1.44 | 73  | 3.07   | 154  | 4.42   |   |
| 2413 | Usp13          | 1.44 | 98  | 3.94   | 196  | 5.67   |   |
| 2414 | Pja2           | 1.44 | 299 | 22.45  | 578  | 32.33  |   |
| 2415 | Cdk6           | 1.44 | 100 | 6.53   | 164  | 9.41   |   |
| 2416 | Dpm1           | 1.44 | 54  | 4.26   | 122  | 6.13   |   |
| 2417 | Tmsb4x         | 1.44 | 675 | 463.86 | 1350 | 667.61 |   |

Supplemental Table 3  
 FSH + Ad-E versus FSH + Ad-FOXO1(A3), 24 hours

|      | A              | B    | C   | D     | E    | F      | G |
|------|----------------|------|-----|-------|------|--------|---|
| 2418 | LOC100912163   | 1.44 | 7   | 2.72  | 7    | 3.91   |   |
| 2419 | Nfxl1          | 1.44 | 58  | 3.81  | 97   | 5.49   |   |
| 2420 | RGD1306072     | 1.44 | 91  | 5.39  | 149  | 7.75   |   |
| 2421 | Fam60a_1       | 1.44 | 68  | 11.5  | 134  | 16.55  |   |
| 2422 | Pcsk5          | 1.44 | 747 | 35.99 | 1497 | 51.75  |   |
| 2423 | AABR07058267.1 | 1.44 | 13  | 10.06 | 25   | 14.46  |   |
| 2424 | Dzip1l         | 1.44 | 51  | 3.66  | 97   | 5.26   |   |
| 2425 | LOC100912585   | 1.44 | 0   | 0.98  | 0    | 1.4    |   |
| 2426 | Carf           | 1.44 | 39  | 2.57  | 62   | 3.69   |   |
| 2427 | Gch1           | 1.44 | 46  | 6.35  | 63   | 9.13   |   |
| 2428 | Vsig10         | 1.44 | 385 | 39.43 | 813  | 56.68  |   |
| 2429 | LOC100910882   | 1.44 | 51  | 63.03 | 98   | 90.6   |   |
| 2430 | Gapdh-ps2      | 1.44 | 36  | 89.35 | 42   | 128.38 |   |
| 2431 | AABR07033564.1 | 1.44 | 33  | 3.38  | 61   | 4.86   |   |
| 2432 | Sart3          | 1.44 | 130 | 8.52  | 206  | 12.24  |   |
| 2433 | Tsc1           | 1.44 | 119 | 8.45  | 203  | 12.14  |   |
| 2434 | Exoc8          | 1.44 | 38  | 5.42  | 73   | 7.79   |   |
| 2435 | Spred1         | 1.44 | 46  | 5.54  | 82   | 7.95   |   |
| 2436 | Wdr60          | 1.44 | 52  | 2.6   | 77   | 3.73   |   |
| 2437 | Tjp1           | 1.44 | 459 | 22.87 | 887  | 32.83  |   |
| 2438 | Ryr2           | 1.44 | 138 | 2.13  | 275  | 3.05   |   |
| 2439 | Hnrnpa0        | 1.43 | 98  | 39.7  | 190  | 56.96  |   |
| 2440 | Dhx36          | 1.43 | 189 | 9.46  | 356  | 13.57  |   |
| 2441 | Fam160a2       | 1.43 | 108 | 4.71  | 157  | 6.75   |   |
| 2442 | Tyro3          | 1.43 | 28  | 2.33  | 48   | 3.34   |   |
| 2443 | Bag1           | 1.43 | 117 | 23.25 | 217  | 33.32  |   |
| 2444 | Mob3b          | 1.43 | 19  | 1.91  | 69   | 2.74   |   |
| 2445 | Rassf7         | 1.43 | 12  | 3.07  | 23   | 4.41   |   |
| 2446 | Tirap          | 1.43 | 18  | 5.77  | 25   | 8.27   |   |
| 2447 | Tdrp           | 1.43 | 13  | 1.64  | 25   | 2.35   |   |
| 2448 | Ppp1r12b       | 1.43 | 484 | 13.45 | 851  | 19.26  |   |
| 2449 | Pdcl3          | 1.43 | 113 | 20.02 | 216  | 28.66  |   |
| 2450 | Hsd1l          | 1.43 | 51  | 9.24  | 94   | 13.23  |   |
| 2451 | Coro1c         | 1.43 | 185 | 17.4  | 346  | 24.91  |   |
| 2452 | Ak6            | 1.43 | 16  | 17.35 | 37   | 24.83  |   |
| 2453 | LOC102553002   | 1.43 | 63  | 3.9   | 92   | 5.58   |   |
| 2454 | Luc7l2         | 1.43 | 442 | 20.65 | 776  | 29.55  |   |
| 2455 | Wbp1           | 1.43 | 0   | 16.06 | 1    | 22.97  |   |
| 2456 | Arnt2          | 1.43 | 134 | 6.75  | 273  | 9.66   |   |
| 2457 | Krit1          | 1.43 | 106 | 6.9   | 198  | 9.87   |   |
| 2458 | Pus1           | 1.43 | 42  | 4.67  | 58   | 6.68   |   |
| 2459 | Picalm         | 1.43 | 399 | 41.96 | 733  | 60.01  |   |
| 2460 | Psme4          | 1.43 | 639 | 27.32 | 1225 | 39.07  |   |
| 2461 | Bcar1          | 1.43 | 288 | 29.63 | 549  | 42.36  |   |
| 2462 | Lsm4           | 1.43 | 45  | 13.51 | 81   | 19.31  |   |
| 2463 | AC115158.1     | 1.43 | 21  | 6.35  | 50   | 9.07   |   |
| 2464 | 2610015P09Rik  | 1.43 | 46  | 1.19  | 68   | 1.7    |   |
| 2465 | E2f2           | 1.43 | 14  | 0.84  | 35   | 1.2    |   |
| 2466 | Fbxo3          | 1.43 | 199 | 10.99 | 376  | 15.69  |   |
| 2467 | Uvrag          | 1.43 | 210 | 9.5   | 410  | 13.56  |   |
| 2468 | Dmd            | 1.43 | 321 | 5.11  | 687  | 7.29   |   |
| 2469 | Zbtb38         | 1.43 | 76  | 6.87  | 145  | 9.8    |   |
| 2470 | Golga3         | 1.43 | 48  | 8.93  | 77   | 12.73  |   |
| 2471 | Smc1a          | 1.43 | 278 | 19.1  | 494  | 27.24  |   |

Supplemental Table 3  
 FSH + Ad-E versus FSH + Ad-FOXO1(A3), 24 hours

|      | A              | B    | C    | D      | E    | F      | G |
|------|----------------|------|------|--------|------|--------|---|
| 2472 | Mcam           | 1.43 | 187  | 22.95  | 355  | 32.73  |   |
| 2473 | Eif2a          | 1.43 | 108  | 12.25  | 187  | 17.46  |   |
| 2474 | Dach1          | 1.43 | 119  | 7.27   | 212  | 10.37  |   |
| 2475 | Zfp786         | 1.43 | 34   | 2.72   | 65   | 3.88   |   |
| 2476 | Taf1d          | 1.43 | 73   | 6.88   | 123  | 9.8    |   |
| 2477 | Zfp451         | 1.43 | 287  | 5.89   | 434  | 8.4    |   |
| 2478 | Asph           | 1.43 | 226  | 6.07   | 471  | 8.64   |   |
| 2479 | Rps6kc1        | 1.42 | 121  | 4.85   | 220  | 6.91   |   |
| 2480 | Stx12          | 1.42 | 169  | 19.02  | 313  | 27.09  |   |
| 2481 | Stk38l         | 1.42 | 180  | 12.4   | 353  | 17.66  |   |
| 2482 | RGD1309362     | 1.42 | 97   | 29.5   | 192  | 42.02  |   |
| 2483 | Arl5b          | 1.42 | 75   | 4.31   | 126  | 6.14   |   |
| 2484 | Ppp4r2         | 1.42 | 216  | 12.83  | 415  | 18.27  |   |
| 2485 | Gltscr1        | 1.42 | 97   | 5.45   | 189  | 7.75   |   |
| 2486 | Hip1           | 1.42 | 325  | 12.71  | 657  | 18.09  |   |
| 2487 | Slc17a5        | 1.42 | 43   | 3.82   | 84   | 5.43   |   |
| 2488 | Trim26         | 1.42 | 141  | 8.22   | 254  | 11.69  |   |
| 2489 | RGD1560108     | 1.42 | 122  | 9.99   | 234  | 14.2   |   |
| 2490 | Qser1          | 1.42 | 389  | 13.83  | 756  | 19.66  |   |
| 2491 | Sh3glb1        | 1.42 | 420  | 25.02  | 804  | 35.55  |   |
| 2492 | Vim            | 1.42 | 2114 | 407.89 | 4037 | 579.57 |   |
| 2493 | Wls            | 1.42 | 834  | 45.15  | 1540 | 64.15  |   |
| 2494 | Ddx52          | 1.42 | 42   | 3.49   | 67   | 4.96   |   |
| 2495 | Lym2           | 1.42 | 20   | 4.68   | 37   | 6.64   |   |
| 2496 | Znhit2         | 1.42 | 10   | 2.82   | 19   | 4.01   |   |
| 2497 | Asb1           | 1.42 | 12   | 1.79   | 23   | 2.55   |   |
| 2498 | Gbbp1          | 1.42 | 180  | 14.24  | 318  | 20.23  |   |
| 2499 | Hnrnpa1        | 1.42 | 406  | 98.51  | 645  | 139.93 |   |
| 2500 | lpmk           | 1.42 | 68   | 3.36   | 117  | 4.77   |   |
| 2501 | Zfp933         | 1.42 | 19   | 4.35   | 37   | 6.19   |   |
| 2502 | Rn60_19_0706.2 | 1.42 | 4    | 5.16   | 11   | 7.33   |   |
| 2503 | Eif4a2         | 1.42 | 557  | 72.13  | 1025 | 102.37 |   |
| 2504 | Rwdd1          | 1.42 | 46   | 12.22  | 88   | 17.33  |   |
| 2505 | Tns3           | 1.42 | 640  | 27.05  | 1241 | 38.37  |   |
| 2506 | Gdap2          | 1.42 | 39   | 3.87   | 82   | 5.49   |   |
| 2507 | Mid2           | 1.42 | 40   | 1.84   | 75   | 2.61   |   |
| 2508 | Glce           | 1.42 | 141  | 10.35  | 270  | 14.68  |   |
| 2509 | Tbc1d15        | 1.42 | 215  | 19.43  | 386  | 27.55  |   |
| 2510 | Odc1           | 1.42 | 410  | 39.98  | 784  | 56.65  |   |
| 2511 | Med15          | 1.42 | 384  | 22.22  | 682  | 31.47  |   |
| 2512 | Ttc28          | 1.42 | 383  | 10.41  | 717  | 14.75  |   |
| 2513 | Zbtb1          | 1.42 | 122  | 7.47   | 197  | 10.58  |   |
| 2514 | Gzf1           | 1.42 | 86   | 6.35   | 157  | 8.99   |   |
| 2515 | Dyrk1a         | 1.41 | 170  | 15.44  | 298  | 21.84  |   |
| 2516 | Rhob           | 1.41 | 248  | 41.78  | 471  | 59.12  |   |
| 2517 | Etl4           | 1.41 | 487  | 14.95  | 1006 | 21.14  |   |
| 2518 | Arl13b         | 1.41 | 98   | 4.62   | 210  | 6.53   |   |
| 2519 | Dennd4a        | 1.41 | 64   | 1.97   | 106  | 2.78   |   |
| 2520 | Sbds           | 1.41 | 63   | 11.95  | 121  | 16.89  |   |
| 2521 | Mtdh           | 1.41 | 110  | 17.85  | 189  | 25.24  |   |
| 2522 | Kifap3         | 1.41 | 160  | 11.09  | 305  | 15.68  |   |
| 2523 | Bcl6           | 1.41 | 139  | 12.61  | 274  | 17.81  |   |
| 2524 | Ago4           | 1.41 | 30   | 1.74   | 55   | 2.46   |   |
| 2525 | Bicd1          | 1.41 | 119  | 2.36   | 233  | 3.34   |   |

Supplemental Table 3  
 FSH + Ad-E versus FSH + Ad-FOXO1(A3), 24 hours

|      | A              | B    | C   | D     | E    | F     | G |
|------|----------------|------|-----|-------|------|-------|---|
| 2526 | Dcaf17         | 1.41 | 34  | 3.25  | 51   | 4.58  |   |
| 2527 | Khdrbs3        | 1.41 | 46  | 7.76  | 98   | 10.96 |   |
| 2528 | Lrrcc1         | 1.41 | 55  | 2.77  | 102  | 3.91  |   |
| 2529 | Mrpl19         | 1.41 | 27  | 8.36  | 53   | 11.81 |   |
| 2530 | Rab39a         | 1.41 | 14  | 0.7   | 21   | 0.99  |   |
| 2531 | Slc43a1        | 1.41 | 26  | 3.58  | 42   | 5.05  |   |
| 2532 | Dagla          | 1.41 | 13  | 0.59  | 24   | 0.83  |   |
| 2533 | mrpl24         | 1.41 | 82  | 10.22 | 127  | 14.43 |   |
| 2534 | Ptgis          | 1.41 | 25  | 3.84  | 49   | 5.43  |   |
| 2535 | SNORD36_7      | 1.41 | 0   | 47.23 | 0    | 66.69 |   |
| 2536 | Wtip           | 1.41 | 40  | 5.7   | 70   | 8.05  |   |
| 2537 | RGD1565616     | 1.41 | 351 | 12.14 | 603  | 17.13 |   |
| 2538 | Exoc6b         | 1.41 | 255 | 7.16  | 433  | 10.11 |   |
| 2539 | Sdc2           | 1.41 | 306 | 33.76 | 589  | 47.64 |   |
| 2540 | Fnta           | 1.41 | 126 | 22.82 | 224  | 32.19 |   |
| 2541 | Evc2           | 1.41 | 59  | 3.12  | 119  | 4.4   |   |
| 2542 | Kif3a          | 1.41 | 48  | 3.27  | 84   | 4.61  |   |
| 2543 | Ublcp1         | 1.41 | 134 | 15.16 | 222  | 21.36 |   |
| 2544 | Pcmt1          | 1.41 | 184 | 10    | 370  | 14.09 |   |
| 2545 | Uchl1          | 1.41 | 158 | 53.09 | 308  | 74.8  |   |
| 2546 | Cgn            | 1.41 | 31  | 1.85  | 63   | 2.6   |   |
| 2547 | Gart           | 1.41 | 148 | 13.86 | 262  | 19.53 |   |
| 2548 | Phf20          | 1.41 | 118 | 10.27 | 199  | 14.46 |   |
| 2549 | Syf2           | 1.41 | 105 | 24.54 | 194  | 34.54 |   |
| 2550 | Atf7           | 1.41 | 165 | 11.08 | 306  | 15.59 |   |
| 2551 | Crlf2          | 1.41 | 21  | 4.86  | 37   | 6.84  |   |
| 2552 | Med29          | 1.41 | 42  | 9.49  | 82   | 13.36 |   |
| 2553 | Nrde2          | 1.41 | 48  | 3.45  | 79   | 4.85  |   |
| 2554 | Slc8b1         | 1.41 | 29  | 2.31  | 59   | 3.25  |   |
| 2555 | Zfc3h1         | 1.41 | 215 | 9.25  | 389  | 13.02 |   |
| 2556 | Slk            | 1.41 | 110 | 8.5   | 205  | 11.96 |   |
| 2557 | Lasp1          | 1.41 | 711 | 68.81 | 1362 | 96.78 |   |
| 2558 | Kihl5          | 1.41 | 57  | 4.42  | 109  | 6.21  |   |
| 2559 | Rpap2          | 1.41 | 70  | 4.67  | 119  | 6.57  |   |
| 2560 | Rpap3          | 1.41 | 148 | 13.6  | 275  | 19.13 |   |
| 2561 | Sfxn3          | 1.4  | 323 | 41.97 | 616  | 58.95 |   |
| 2562 | Klf7_1         | 1.4  | 29  | 3.63  | 57   | 5.09  |   |
| 2563 | Acsl1          | 1.4  | 92  | 7.39  | 182  | 10.38 |   |
| 2564 | Irf2           | 1.4  | 91  | 5.62  | 163  | 7.89  |   |
| 2565 | Isca2          | 1.4  | 42  | 25.77 | 82   | 36.16 |   |
| 2566 | Etv3           | 1.4  | 83  | 5.07  | 154  | 7.11  |   |
| 2567 | Rn60_X_0752.3  | 1.4  | 111 | 44.34 | 195  | 62.19 |   |
| 2568 | Cspg5          | 1.4  | 36  | 6.75  | 65   | 9.46  |   |
| 2569 | Ctf1           | 1.4  | 8   | 2.07  | 17   | 2.9   |   |
| 2570 | Larp1b         | 1.4  | 40  | 2.99  | 75   | 4.19  |   |
| 2571 | LOC100909544   | 1.4  | 0   | 1.71  | 1    | 2.4   |   |
| 2572 | Taf12          | 1.4  | 28  | 3.36  | 56   | 4.7   |   |
| 2573 | Taf1b          | 1.4  | 34  | 1.41  | 31   | 1.98  |   |
| 2574 | Zfp113         | 1.4  | 29  | 4.4   | 50   | 6.17  |   |
| 2575 | AABR07059168.2 | 1.4  | 30  | 3.92  | 69   | 5.5   |   |
| 2576 | Ankrd42        | 1.4  | 45  | 3.14  | 91   | 4.4   |   |
| 2577 | Ap1s3          | 1.4  | 69  | 4.57  | 115  | 6.41  |   |
| 2578 | Cnot6l         | 1.4  | 162 | 11.02 | 304  | 15.45 |   |
| 2579 | Ildr2          | 1.4  | 16  | 1.46  | 27   | 2.05  |   |



Supplemental Table 3  
 FSH + Ad-E versus FSH + Ad-FOXO1(A3), 24 hours

|      | A              | B    | C   | D      | E   | F      | G |
|------|----------------|------|-----|--------|-----|--------|---|
| 2580 | Leng1          | 1.4  | 12  | 1.57   | 19  | 2.2    |   |
| 2581 | Nat8l          | 1.4  | 8   | 0.88   | 15  | 1.24   |   |
| 2582 | Pctp           | 1.4  | 12  | 1.51   | 23  | 2.12   |   |
| 2583 | Ppp2r3a        | 1.4  | 166 | 3.99   | 257 | 5.59   |   |
| 2584 | Scara3         | 1.4  | 11  | 0.86   | 16  | 1.2    |   |
| 2585 | Zmat3          | 1.4  | 23  | 4.52   | 46  | 6.33   |   |
| 2586 | Rnf5           | 1.4  | 17  | 21.49  | 23  | 30.1   |   |
| 2587 | Pogk           | 1.4  | 261 | 12.52  | 483 | 17.52  |   |
| 2588 | Rtn4           | 1.4  | 477 | 33.19  | 865 | 46.46  |   |
| 2589 | Yes1           | 1.4  | 153 | 6.3    | 259 | 8.82   |   |
| 2590 | Ptpn12         | 1.4  | 141 | 12.24  | 271 | 17.13  |   |
| 2591 | Akr1c19        | 1.4  | 81  | 8.28   | 132 | 11.59  |   |
| 2592 | Kif15          | 1.4  | 42  | 2.35   | 75  | 3.28   |   |
| 2593 | Rab3gap1       | 1.4  | 153 | 19.23  | 280 | 26.9   |   |
| 2594 | Rbm6           | 1.4  | 271 | 12.75  | 456 | 17.82  |   |
| 2595 | ldh1           | 1.4  | 301 | 49.63  | 569 | 69.4   |   |
| 2596 | Dmtf1          | 1.4  | 186 | 11.79  | 307 | 16.47  |   |
| 2597 | LOC100362432   | 1.4  | 55  | 15.14  | 93  | 21.16  |   |
| 2598 | Crk            | 1.4  | 142 | 24.27  | 256 | 33.92  |   |
| 2599 | Dbn1           | 1.4  | 342 | 40.85  | 633 | 57.07  |   |
| 2600 | Fam188a        | 1.4  | 79  | 5.93   | 126 | 8.28   |   |
| 2601 | Tcf20          | 1.4  | 147 | 6.74   | 279 | 9.41   |   |
| 2602 | Prrg1          | 1.4  | 127 | 8.94   | 238 | 12.47  |   |
| 2603 | AABR07015078.1 | 1.4  | 0   | 13.21  | 0   | 18.44  |   |
| 2604 | Gan            | 1.4  | 24  | 1.99   | 42  | 2.78   |   |
| 2605 | Mtx3           | 1.4  | 34  | 4.72   | 67  | 6.59   |   |
| 2606 | AY172581.10    | 1.4  | 15  | 79.87  | 28  | 111.46 |   |
| 2607 | Traf3ip1       | 1.4  | 44  | 2.25   | 71  | 3.14   |   |
| 2608 | Bcl11a         | 1.39 | 205 | 7.74   | 320 | 10.79  |   |
| 2609 | Dopey1         | 1.39 | 146 | 3.86   | 239 | 5.38   |   |
| 2610 | Exoc2          | 1.39 | 172 | 18.64  | 340 | 26     |   |
| 2611 | Srp54a         | 1.39 | 102 | 13.86  | 188 | 19.34  |   |
| 2612 | Urgcp          | 1.39 | 111 | 7.01   | 196 | 9.78   |   |
| 2613 | RGD1304728     | 1.39 | 78  | 4.19   | 134 | 5.84   |   |
| 2614 | Rps15a         | 1.39 | 66  | 170.44 | 66  | 237.63 |   |
| 2615 | Klhdc2         | 1.39 | 97  | 28.47  | 202 | 39.68  |   |
| 2616 | LOC100362658   | 1.39 | 24  | 3      | 42  | 4.18   |   |
| 2617 | Rab11a         | 1.39 | 134 | 19.85  | 229 | 27.64  |   |
| 2618 | Arglu1         | 1.39 | 209 | 21.5   | 383 | 29.94  |   |
| 2619 | Helz           | 1.39 | 225 | 9.76   | 413 | 13.59  |   |
| 2620 | Arhgef5        | 1.39 | 37  | 2.14   | 69  | 2.98   |   |
| 2621 | Tmcc2          | 1.39 | 45  | 2.85   | 84  | 3.97   |   |
| 2622 | Adprhl2        | 1.39 | 63  | 12.61  | 117 | 17.55  |   |
| 2623 | Bahd1          | 1.39 | 92  | 7.27   | 166 | 10.12  |   |
| 2624 | Actr3          | 1.39 | 396 | 53     | 735 | 73.77  |   |
| 2625 | Ahr            | 1.39 | 93  | 6.05   | 176 | 8.42   |   |
| 2626 | Faf1           | 1.39 | 165 | 16.9   | 268 | 23.51  |   |
| 2627 | Prkd1          | 1.39 | 129 | 4.6    | 201 | 6.4    |   |
| 2628 | Tll1           | 1.39 | 68  | 3.83   | 133 | 5.33   |   |
| 2629 | Zfp445         | 1.39 | 133 | 13.2   | 267 | 18.36  |   |
| 2630 | Mbd2           | 1.39 | 105 | 14.22  | 161 | 19.76  |   |
| 2631 | Hipk3          | 1.39 | 336 | 25.62  | 618 | 35.6   |   |
| 2632 | Fam25a         | 1.39 | 9   | 6.34   | 15  | 8.8    |   |
| 2633 | AABR07065420.1 | 1.39 | 12  | 1.74   | 24  | 2.41   |   |

Supplemental Table 3  
 FSH + Ad-E versus FSH + Ad-FOXO1(A3), 24 hours

|      | A              | B    | C   | D      | E    | F      | G |
|------|----------------|------|-----|--------|------|--------|---|
| 2634 | Fez2           | 1.39 | 132 | 14.7   | 243  | 20.41  |   |
| 2635 | LOC100909998   | 1.39 | 7   | 0.67   | 13   | 0.93   |   |
| 2636 | Myh15          | 1.39 | 14  | 0.44   | 20   | 0.61   |   |
| 2637 | Nsmce2         | 1.39 | 115 | 8.55   | 167  | 11.87  |   |
| 2638 | Plekha2        | 1.39 | 155 | 8.67   | 304  | 12.04  |   |
| 2639 | Rpf2           | 1.39 | 34  | 6.08   | 61   | 8.45   |   |
| 2640 | Shmt1          | 1.39 | 22  | 1.24   | 22   | 1.72   |   |
| 2641 | Slc25a37       | 1.39 | 16  | 1.61   | 31   | 2.23   |   |
| 2642 | Spata7         | 1.39 | 56  | 2.53   | 101  | 3.52   |   |
| 2643 | Usp53          | 1.39 | 79  | 3.73   | 144  | 5.19   |   |
| 2644 | Smarca1        | 1.39 | 50  | 3.21   | 89   | 4.46   |   |
| 2645 | Ptpn21         | 1.39 | 157 | 8.62   | 296  | 11.96  |   |
| 2646 | Sbf2           | 1.39 | 387 | 13.57  | 800  | 18.83  |   |
| 2647 | Cbx2           | 1.39 | 87  | 8.01   | 159  | 11.12  |   |
| 2648 | Cobll1         | 1.39 | 127 | 6.12   | 210  | 8.48   |   |
| 2649 | AABR07042359.1 | 1.39 | 13  | 208.15 | 14   | 288.67 |   |
| 2650 | Ssh1           | 1.39 | 127 | 6.46   | 188  | 8.95   |   |
| 2651 | Fbxo38         | 1.39 | 212 | 14.8   | 399  | 20.52  |   |
| 2652 | Aes            | 1.39 | 123 | 68.43  | 220  | 94.88  |   |
| 2653 | LOC100910891   | 1.39 | 5   | 40.23  | 11   | 55.78  |   |
| 2654 | Pank2          | 1.39 | 105 | 9.37   | 172  | 12.99  |   |
| 2655 | Kctd3          | 1.39 | 175 | 14.04  | 310  | 19.46  |   |
| 2656 | Vasp           | 1.39 | 150 | 23.38  | 280  | 32.39  |   |
| 2657 | Tex10          | 1.38 | 85  | 5.67   | 150  | 7.86   |   |
| 2658 | Wbp5           | 1.38 | 950 | 347.77 | 1780 | 481.53 |   |
| 2659 | Foxn2          | 1.38 | 87  | 6.17   | 159  | 8.54   |   |
| 2660 | Zc4h2          | 1.38 | 32  | 4.57   | 54   | 6.32   |   |
| 2661 | Zbtb41         | 1.38 | 50  | 5.49   | 90   | 7.6    |   |
| 2662 | Clip1          | 1.38 | 143 | 5.21   | 270  | 7.2    |   |
| 2663 | Tmem194b       | 1.38 | 61  | 5.16   | 102  | 7.15   |   |
| 2664 | Lzts2          | 1.38 | 194 | 23.82  | 353  | 32.96  |   |
| 2665 | Kank2          | 1.38 | 885 | 55.19  | 1647 | 76.35  |   |
| 2666 | Tspan5         | 1.38 | 219 | 13.59  | 396  | 18.8   |   |
| 2667 | Baiap2l1       | 1.38 | 102 | 9.57   | 216  | 13.23  |   |
| 2668 | Palld          | 1.38 | 85  | 4.81   | 150  | 6.66   |   |
| 2669 | RGD1306926     | 1.38 | 48  | 2.75   | 81   | 3.8    |   |
| 2670 | Snw1           | 1.38 | 102 | 15.96  | 166  | 22.07  |   |
| 2671 | Irx5           | 1.38 | 21  | 3.02   | 38   | 4.17   |   |
| 2672 | Nudc           | 1.38 | 140 | 33.24  | 238  | 45.98  |   |
| 2673 | Plekha5        | 1.38 | 187 | 8.17   | 426  | 11.3   |   |
| 2674 | Wdr55          | 1.38 | 214 | 22.21  | 387  | 30.71  |   |
| 2675 | Mon1b          | 1.38 | 71  | 9.51   | 139  | 13.15  |   |
| 2676 | Sprtn          | 1.38 | 38  | 6.12   | 71   | 8.46   |   |
| 2677 | Cep95          | 1.38 | 61  | 4.05   | 123  | 5.6    |   |
| 2678 | Arih1          | 1.38 | 332 | 17.28  | 572  | 23.88  |   |
| 2679 | Sft2d2         | 1.38 | 302 | 20.18  | 561  | 27.89  |   |
| 2680 | Smad9          | 1.38 | 67  | 5.06   | 114  | 6.99   |   |
| 2681 | Brwd1          | 1.38 | 309 | 5.58   | 462  | 7.71   |   |
| 2682 | Enah           | 1.38 | 257 | 22.17  | 410  | 30.61  |   |
| 2683 | Cep350         | 1.38 | 131 | 4.07   | 241  | 5.62   |   |
| 2684 | Cyb561d2       | 1.38 | 14  | 3.2    | 26   | 4.42   |   |
| 2685 | Bivm           | 1.38 | 70  | 9.36   | 111  | 12.92  |   |
| 2686 | Itga2          | 1.38 | 43  | 2.44   | 77   | 3.37   |   |
| 2687 | LOC100911393_1 | 1.38 | 16  | 6.03   | 29   | 8.33   |   |

Supplemental Table 3  
 FSH + Ad-E versus FSH + Ad-FOXO1(A3), 24 hours

|      | A               | B    | C    | D      | E    | F      | G |
|------|-----------------|------|------|--------|------|--------|---|
| 2688 | Mtrf1           | 1.38 | 24   | 2.42   | 51   | 3.35   |   |
| 2689 | RGD1559786      | 1.38 | 45   | 10.13  | 82   | 13.98  |   |
| 2690 | Trim68          | 1.38 | 17   | 2.31   | 45   | 3.19   |   |
| 2691 | Usp43           | 1.38 | 20   | 1.51   | 32   | 2.08   |   |
| 2692 | ENSRNOG00000046 | 1.38 | 10   | 1.89   | 21   | 2.62   |   |
| 2693 | Zfp507          | 1.38 | 205  | 9.86   | 324  | 13.61  |   |
| 2694 | Mettl9          | 1.38 | 146  | 27.35  | 250  | 37.74  |   |
| 2695 | Nap111          | 1.38 | 205  | 41.97  | 341  | 57.87  |   |
| 2696 | Sspn            | 1.38 | 113  | 11.11  | 225  | 15.32  |   |
| 2697 | Hnrnpab_2       | 1.38 | 0    | 43.32  | 0    | 59.72  |   |
| 2698 | Auts2           | 1.38 | 236  | 23.36  | 426  | 32.19  |   |
| 2699 | Gins2           | 1.38 | 55   | 4.4    | 98   | 6.07   |   |
| 2700 | Pam             | 1.38 | 4530 | 313.92 | 8485 | 432.47 |   |
| 2701 | Dchs1           | 1.38 | 300  | 10.12  | 555  | 13.94  |   |
| 2702 | Cep112          | 1.38 | 99   | 1.99   | 151  | 2.75   |   |
| 2703 | Ing2            | 1.38 | 22   | 2.51   | 36   | 3.46   |   |
| 2704 | Prdm10          | 1.38 | 60   | 2.05   | 120  | 2.82   |   |
| 2705 | Fundc1          | 1.38 | 46   | 6.83   | 89   | 9.41   |   |
| 2706 | Urb2            | 1.38 | 40   | 2.26   | 92   | 3.12   |   |
| 2707 | Eps15           | 1.38 | 541  | 54.49  | 1066 | 75.04  |   |
| 2708 | Tfcp2           | 1.38 | 133  | 9.71   | 244  | 13.36  |   |
| 2709 | Sowahc          | 1.38 | 118  | 9.65   | 218  | 13.27  |   |
| 2710 | P3h2            | 1.38 | 38   | 4.29   | 82   | 5.9    |   |
| 2711 | Zscan2          | 1.38 | 33   | 2.86   | 56   | 3.93   |   |
| 2712 | Rbm41           | 1.38 | 47   | 1.62   | 71   | 2.23   |   |
| 2713 | Sec24b          | 1.38 | 413  | 24.83  | 774  | 34.15  |   |
| 2714 | Iqsec2          | 1.37 | 100  | 4.49   | 192  | 6.18   |   |
| 2715 | Dennd1a         | 1.37 | 271  | 4.9    | 487  | 6.73   |   |
| 2716 | RGD1563242      | 1.37 | 58   | 11.14  | 90   | 15.3   |   |
| 2717 | Cebpg           | 1.37 | 73   | 7.21   | 127  | 9.9    |   |
| 2718 | P4ha3           | 1.37 | 53   | 8.07   | 114  | 11.09  |   |
| 2719 | Safb            | 1.37 | 150  | 12.61  | 276  | 17.33  |   |
| 2720 | Arsk            | 1.37 | 42   | 4.32   | 80   | 5.94   |   |
| 2721 | Tpp2            | 1.37 | 247  | 10.5   | 446  | 14.43  |   |
| 2722 | Zcchc8          | 1.37 | 123  | 8.71   | 220  | 11.96  |   |
| 2723 | Bcr             | 1.37 | 188  | 12.68  | 338  | 17.41  |   |
| 2724 | Usp47           | 1.37 | 549  | 25.58  | 938  | 35.13  |   |
| 2725 | Rabep1          | 1.37 | 182  | 10.23  | 323  | 14.05  |   |
| 2726 | Zeb2            | 1.37 | 689  | 36.19  | 1313 | 49.64  |   |
| 2727 | Zfand5          | 1.37 | 184  | 29.51  | 346  | 40.47  |   |
| 2728 | Naa15           | 1.37 | 242  | 11.61  | 433  | 15.92  |   |
| 2729 | Kctd11          | 1.37 | 6    | 1      | 11   | 1.38   |   |
| 2730 | Adamts16        | 1.37 | 24   | 1.19   | 46   | 1.63   |   |
| 2731 | Ccdc181         | 1.37 | 16   | 2.28   | 25   | 3.12   |   |
| 2732 | Cdon            | 1.37 | 65   | 3.17   | 115  | 4.35   |   |
| 2733 | Cfap70          | 1.37 | 14   | 0.54   | 16   | 0.74   |   |
| 2734 | LOC100910581    | 1.37 | 0    | 2.31   | 0    | 3.17   |   |
| 2735 | Morc4           | 1.37 | 36   | 1.81   | 68   | 2.49   |   |
| 2736 | Nucb2           | 1.37 | 78   | 6.86   | 136  | 9.41   |   |
| 2737 | Sema6c          | 1.37 | 8    | 0.66   | 12   | 0.9    |   |
| 2738 | Zfp51           | 1.37 | 21   | 2.59   | 35   | 3.55   |   |
| 2739 | Zfp763          | 1.37 | 11   | 2.49   | 22   | 3.42   |   |
| 2740 | Arl10           | 1.37 | 34   | 5.55   | 68   | 7.61   |   |
| 2741 | Dgat2           | 1.37 | 10   | 0.69   | 20   | 0.94   |   |

Supplemental Table 3  
 FSH + Ad-E versus FSH + Ad-FOXO1(A3), 24 hours

|      | A              | B    | C    | D      | E    | F      | G |
|------|----------------|------|------|--------|------|--------|---|
| 2742 | Fbxo45         | 1.37 | 19   | 2.56   | 26   | 3.51   |   |
| 2743 | Golgb1         | 1.37 | 444  | 13.04  | 798  | 17.87  |   |
| 2744 | Gpsm2          | 1.37 | 24   | 2.52   | 44   | 3.45   |   |
| 2745 | Lymr1          | 1.37 | 11   | 1.75   | 23   | 2.4    |   |
| 2746 | RGD1563091     | 1.37 | 30   | 2.1    | 55   | 2.88   |   |
| 2747 | Spata9         | 1.37 | 27   | 2.1    | 47   | 2.87   |   |
| 2748 | Uap111         | 1.37 | 42   | 4.83   | 80   | 6.62   |   |
| 2749 | Zscan30        | 1.37 | 20   | 3.2    | 42   | 4.38   |   |
| 2750 | Cramp1l        | 1.37 | 163  | 8.63   | 310  | 11.82  |   |
| 2751 | Fat4           | 1.37 | 252  | 7.65   | 451  | 10.48  |   |
| 2752 | Mga            | 1.37 | 266  | 8.94   | 483  | 12.24  |   |
| 2753 | Itga8          | 1.37 | 251  | 12.49  | 445  | 17.1   |   |
| 2754 | Phlpp2         | 1.37 | 168  | 8.02   | 295  | 10.98  |   |
| 2755 | Phlpp1         | 1.37 | 159  | 5.29   | 277  | 7.24   |   |
| 2756 | Mylip          | 1.37 | 226  | 18.88  | 421  | 25.84  |   |
| 2757 | Plekhb2        | 1.37 | 299  | 31.97  | 559  | 43.75  |   |
| 2758 | Thyn1          | 1.37 | 100  | 18.79  | 151  | 25.72  |   |
| 2759 | Akap11         | 1.37 | 221  | 7.88   | 396  | 10.78  |   |
| 2760 | Dst            | 1.37 | 1433 | 18.5   | 2608 | 25.31  |   |
| 2761 | Aftph          | 1.37 | 171  | 11.47  | 284  | 15.69  |   |
| 2762 | Tpbg           | 1.37 | 272  | 42.05  | 506  | 57.5   |   |
| 2763 | 03/08/15       | 1.37 | 193  | 12.58  | 331  | 17.2   |   |
| 2764 | Derl3          | 1.37 | 38   | 18.45  | 71   | 25.22  |   |
| 2765 | Canx           | 1.37 | 1879 | 134.27 | 3476 | 183.56 |   |
| 2766 | Commnd3        | 1.37 | 68   | 25.21  | 129  | 34.46  |   |
| 2767 | Col8a1         | 1.37 | 453  | 34.43  | 901  | 47.04  |   |
| 2768 | Tmem106b       | 1.37 | 142  | 17.36  | 255  | 23.72  |   |
| 2769 | Clcn3          | 1.37 | 123  | 9.69   | 224  | 13.24  |   |
| 2770 | Aff4           | 1.37 | 664  | 25.46  | 1217 | 34.77  |   |
| 2771 | Mbd6           | 1.37 | 94   | 8.92   | 174  | 12.18  |   |
| 2772 | AABR07002120.1 | 1.37 | 4    | 5.64   | 9    | 7.7    |   |
| 2773 | Fmr1           | 1.37 | 151  | 9.72   | 281  | 13.28  |   |
| 2774 | Zfp229         | 1.37 | 24   | 3.65   | 45   | 4.98   |   |
| 2775 | Ccdc62         | 1.37 | 95   | 2.9    | 136  | 3.96   |   |
| 2776 | Phf20l1        | 1.37 | 58   | 3.76   | 80   | 5.14   |   |
| 2777 | Lamp2          | 1.36 | 590  | 82.07  | 1080 | 112.03 |   |
| 2778 | Ibtk           | 1.36 | 163  | 11.26  | 303  | 15.36  |   |
| 2779 | Cwc27          | 1.36 | 92   | 6.27   | 164  | 8.56   |   |
| 2780 | Rasal2         | 1.36 | 107  | 3.11   | 169  | 4.25   |   |
| 2781 | Ndel1          | 1.36 | 117  | 12.18  | 212  | 16.61  |   |
| 2782 | Rap1a          | 1.36 | 66   | 8.82   | 140  | 12.03  |   |
| 2783 | Siae           | 1.36 | 65   | 5.96   | 124  | 8.14   |   |
| 2784 | Rab1a          | 1.36 | 311  | 42.43  | 546  | 57.87  |   |
| 2785 | Myo9b          | 1.36 | 292  | 11.64  | 538  | 15.87  |   |
| 2786 | Rock1          | 1.36 | 268  | 13.05  | 484  | 17.78  |   |
| 2787 | Sdad1          | 1.36 | 69   | 5.97   | 102  | 8.14   |   |
| 2788 | Vezt           | 1.36 | 71   | 5.66   | 122  | 7.71   |   |
| 2789 | Phc3           | 1.36 | 144  | 7.29   | 247  | 9.93   |   |
| 2790 | Tsc22d2        | 1.36 | 113  | 4.13   | 173  | 5.63   |   |
| 2791 | Tmem80         | 1.36 | 54   | 5.36   | 106  | 7.3    |   |
| 2792 | Abtb2          | 1.36 | 84   | 4.59   | 193  | 6.25   |   |
| 2793 | Mast3          | 1.36 | 55   | 2.99   | 94   | 4.07   |   |
| 2794 | Zdhhc17        | 1.36 | 126  | 6.27   | 186  | 8.54   |   |
| 2795 | Vopp1          | 1.36 | 65   | 7.66   | 122  | 10.42  |   |

Supplemental Table 3  
 FSH + Ad-E versus FSH + Ad-FOXO1(A3), 24 hours

|      | A              | B    | C    | D     | E    | F      | G |
|------|----------------|------|------|-------|------|--------|---|
| 2796 | Cped1          | 1.36 | 212  | 8.29  | 452  | 11.27  |   |
| 2797 | Bicd2          | 1.36 | 166  | 8.53  | 318  | 11.6   |   |
| 2798 | Atxn1l         | 1.36 | 87   | 13.33 | 158  | 18.11  |   |
| 2799 | Slc35g1        | 1.36 | 16   | 3.61  | 24   | 4.9    |   |
| 2800 | Khnyn          | 1.36 | 44   | 5.89  | 91   | 8.01   |   |
| 2801 | RGD1307315     | 1.36 | 13   | 2.03  | 29   | 2.76   |   |
| 2802 | Runx1          | 1.36 | 60   | 3.52  | 111  | 4.78   |   |
| 2803 | Slc18a2        | 1.36 | 20   | 1.37  | 34   | 1.86   |   |
| 2804 | Stx17          | 1.36 | 48   | 4.8   | 70   | 6.53   |   |
| 2805 | Tank           | 1.36 | 68   | 5.47  | 97   | 7.43   |   |
| 2806 | Zfp592         | 1.36 | 171  | 7.68  | 303  | 10.44  |   |
| 2807 | Papd5          | 1.36 | 98   | 5.4   | 183  | 7.34   |   |
| 2808 | Mam11          | 1.36 | 185  | 11.18 | 335  | 15.18  |   |
| 2809 | Tnpo1          | 1.36 | 516  | 20.68 | 914  | 28.08  |   |
| 2810 | Casp7          | 1.36 | 47   | 5.66  | 77   | 7.68   |   |
| 2811 | Arhgap18       | 1.36 | 118  | 12.83 | 211  | 17.41  |   |
| 2812 | Tceal8         | 1.36 | 122  | 42.72 | 228  | 57.95  |   |
| 2813 | Pik3ca         | 1.36 | 118  | 10.37 | 236  | 14.06  |   |
| 2814 | lcmt           | 1.36 | 45   | 8.9   | 82   | 12.07  |   |
| 2815 | Ubfd1          | 1.36 | 53   | 5.15  | 102  | 6.98   |   |
| 2816 | Tsn            | 1.36 | 68   | 16.72 | 126  | 22.66  |   |
| 2817 | Supt20         | 1.36 | 219  | 17.55 | 389  | 23.8   |   |
| 2818 | Zfp84          | 1.36 | 251  | 3.34  | 380  | 4.53   |   |
| 2819 | Asap1          | 1.36 | 103  | 7.12  | 198  | 9.65   |   |
| 2820 | Ubc            | 1.36 | 3810 | 544.6 | 6918 | 738.26 |   |
| 2821 | Ankib1         | 1.36 | 174  | 6.06  | 287  | 8.22   |   |
| 2822 | Nucb1          | 1.36 | 119  | 55.61 | 230  | 75.37  |   |
| 2823 | Invs           | 1.36 | 40   | 1.71  | 65   | 2.31   |   |
| 2824 | Gas2l1         | 1.36 | 53   | 6.38  | 102  | 8.64   |   |
| 2825 | Hnrnp2         | 1.36 | 135  | 29.43 | 248  | 39.87  |   |
| 2826 | Kif2a          | 1.36 | 189  | 21.94 | 339  | 29.74  |   |
| 2827 | Spire1         | 1.36 | 91   | 4.15  | 152  | 5.62   |   |
| 2828 | Pcm1           | 1.35 | 379  | 14.58 | 666  | 19.74  |   |
| 2829 | Pdap1          | 1.35 | 150  | 32.96 | 264  | 44.61  |   |
| 2830 | Magt1          | 1.35 | 295  | 19.66 | 515  | 26.6   |   |
| 2831 | Zbtb20         | 1.35 | 476  | 11.29 | 850  | 15.28  |   |
| 2832 | AABR07072539.1 | 1.35 | 3    | 2.86  | 5    | 3.87   |   |
| 2833 | Arhgef26       | 1.35 | 32   | 1.69  | 69   | 2.28   |   |
| 2834 | Ate1           | 1.35 | 205  | 10.8  | 361  | 14.62  |   |
| 2835 | SNORD79        | 1.35 | 21   | 89.45 | 38   | 121.02 |   |
| 2836 | Zfp579         | 1.35 | 33   | 3.55  | 57   | 4.8    |   |
| 2837 | Tab3           | 1.35 | 26   | 3.54  | 49   | 4.8    |   |
| 2838 | Calm2          | 1.35 | 173  | 58.86 | 320  | 79.6   |   |
| 2839 | Zswim4         | 1.35 | 79   | 5.35  | 153  | 7.24   |   |
| 2840 | Rrbp1          | 1.35 | 413  | 27.15 | 731  | 36.71  |   |
| 2841 | Thumpd3        | 1.35 | 106  | 14.27 | 186  | 19.29  |   |
| 2842 | Agpat5         | 1.35 | 50   | 4.62  | 80   | 6.24   |   |
| 2843 | Rn60_1_1359.1  | 1.35 | 62   | 4.93  | 128  | 6.66   |   |
| 2844 | Txndc9         | 1.35 | 80   | 18.07 | 143  | 24.41  |   |
| 2845 | Eif2b3         | 1.35 | 71   | 5.27  | 111  | 7.11   |   |
| 2846 | Nup35          | 1.35 | 38   | 6.76  | 70   | 9.13   |   |
| 2847 | RGD1306063     | 1.35 | 75   | 9.56  | 120  | 12.91  |   |
| 2848 | Zcchc24        | 1.35 | 148  | 10.56 | 268  | 14.26  |   |
| 2849 | Eme2           | 1.35 | 44   | 11.59 | 79   | 15.64  |   |

Supplemental Table 3  
 FSH + Ad-E versus FSH + Ad-FOXO1(A3), 24 hours

|      | A              | B    | C   | D     | E    | F     | G |
|------|----------------|------|-----|-------|------|-------|---|
| 2850 | Ier3           | 1.35 | 36  | 10.17 | 65   | 13.72 |   |
| 2851 | Srek1          | 1.35 | 174 | 13.24 | 255  | 17.87 |   |
| 2852 | Zdhhc9         | 1.35 | 49  | 5.64  | 89   | 7.61  |   |
| 2853 | Lrrc14         | 1.35 | 69  | 6.85  | 117  | 9.25  |   |
| 2854 | Pik3r3         | 1.35 | 77  | 8.14  | 134  | 10.98 |   |
| 2855 | Lrrk1          | 1.35 | 73  | 2.37  | 119  | 3.2   |   |
| 2856 | Sp3            | 1.35 | 183 | 25.83 | 308  | 34.83 |   |
| 2857 | Stag1          | 1.35 | 279 | 9.06  | 482  | 12.21 |   |
| 2858 | Tmem47         | 1.35 | 173 | 14.73 | 316  | 19.86 |   |
| 2859 | Armc8          | 1.35 | 132 | 4.56  | 198  | 6.15  |   |
| 2860 | Rbm19          | 1.35 | 89  | 5.14  | 149  | 6.93  |   |
| 2861 | Cntrl          | 1.35 | 95  | 3.15  | 155  | 4.25  |   |
| 2862 | AABR07055834.1 | 1.35 | 6   | 0.96  | 10   | 1.29  |   |
| 2863 | Agtr1a         | 1.35 | 6   | 0.83  | 12   | 1.12  |   |
| 2864 | Chaf1a         | 1.35 | 60  | 5.4   | 103  | 7.27  |   |
| 2865 | Dusp22         | 1.35 | 45  | 3.13  | 58   | 4.21  |   |
| 2866 | Gtdc1          | 1.35 | 65  | 1.61  | 90   | 2.17  |   |
| 2867 | LOC100910867   | 1.35 | 33  | 0.58  | 30   | 0.77  |   |
| 2868 | LOC100911519   | 1.35 | 0   | 0.66  | 0    | 0.88  |   |
| 2869 | Mynn           | 1.35 | 77  | 9.27  | 145  | 12.47 |   |
| 2870 | Myo19          | 1.35 | 55  | 3.14  | 105  | 4.22  |   |
| 2871 | RGD1359508     | 1.35 | 8   | 1.59  | 17   | 2.14  |   |
| 2872 | Ripk3          | 1.35 | 9   | 0.9   | 12   | 1.22  |   |
| 2873 | Traf6          | 1.35 | 71  | 8.03  | 134  | 10.8  |   |
| 2874 | AABR07005535.1 | 1.35 | 5   | 0.8   | 8    | 1.08  |   |
| 2875 | AABR07034669.1 | 1.35 | 35  | 0.57  | 41   | 0.77  |   |
| 2876 | AABR07073453.1 | 1.35 | 4   | 0.35  | 9    | 0.48  |   |
| 2877 | AC114460.1     | 1.35 | 6   | 2.29  | 9    | 3.08  |   |
| 2878 | B3gnt1l        | 1.35 | 52  | 1.2   | 66   | 1.61  |   |
| 2879 | Cacnb1         | 1.35 | 6   | 0.53  | 12   | 0.71  |   |
| 2880 | Cbr1_2         | 1.35 | 0   | 3.84  | 0    | 5.17  |   |
| 2881 | Cebpz          | 1.35 | 137 | 10.4  | 229  | 13.99 |   |
| 2882 | Hcn4           | 1.35 | 6   | 0.33  | 9    | 0.44  |   |
| 2883 | Jtb            | 1.35 | 31  | 15.23 | 56   | 20.5  |   |
| 2884 | Kctd6          | 1.35 | 15  | 2.33  | 22   | 3.14  |   |
| 2885 | Pak1ip1        | 1.35 | 25  | 4.68  | 48   | 6.3   |   |
| 2886 | Parpbp         | 1.35 | 7   | 0.41  | 10   | 0.55  |   |
| 2887 | Pcdhb10        | 1.35 | 5   | 0.4   | 9    | 0.54  |   |
| 2888 | Per3           | 1.35 | 109 | 5.07  | 228  | 6.83  |   |
| 2889 | Pkig           | 1.35 | 273 | 67.4  | 620  | 90.7  |   |
| 2890 | Pth1r          | 1.35 | 13  | 1.64  | 25   | 2.21  |   |
| 2891 | Rps19bp1       | 1.35 | 5   | 3.52  | 9    | 4.73  |   |
| 2892 | SNORD45_2      | 1.35 | 0   | 22.35 | 0    | 30.08 |   |
| 2893 | Snrnp48        | 1.35 | 82  | 3.02  | 131  | 4.06  |   |
| 2894 | Thrb           | 1.35 | 27  | 0.28  | 34   | 0.37  |   |
| 2895 | Tmem136        | 1.35 | 78  | 8.18  | 145  | 11.01 |   |
| 2896 | Hnrnpu         | 1.34 | 800 | 67.63 | 1419 | 90.91 |   |
| 2897 | Fam53c         | 1.34 | 112 | 13.97 | 186  | 18.78 |   |
| 2898 | Fam84a         | 1.34 | 169 | 16.36 | 304  | 21.98 |   |
| 2899 | Zfp282         | 1.34 | 195 | 12.2  | 358  | 16.39 |   |
| 2900 | Vps54          | 1.34 | 151 | 9.06  | 262  | 12.17 |   |
| 2901 | Mkl1           | 1.34 | 91  | 4.68  | 168  | 6.28  |   |
| 2902 | Rsu1           | 1.34 | 107 | 21.35 | 205  | 28.67 |   |
| 2903 | Smarca2        | 1.34 | 268 | 10.62 | 450  | 14.26 |   |

Supplemental Table 3  
 FSH + Ad-E versus FSH + Ad-FOXO1(A3), 24 hours

|      | A              | B    | C   | D      | E   | F      | G |
|------|----------------|------|-----|--------|-----|--------|---|
| 2904 | Smim19         | 1.34 | 79  | 7.17   | 125 | 9.62   |   |
| 2905 | AABR07002177.1 | 1.34 | 15  | 19.95  | 20  | 26.78  |   |
| 2906 | Atp9b          | 1.34 | 268 | 11.29  | 515 | 15.15  |   |
| 2907 | Rnf144b        | 1.34 | 64  | 2.81   | 143 | 3.77   |   |
| 2908 | St6galnac3     | 1.34 | 102 | 4.83   | 244 | 6.48   |   |
| 2909 | Smc5           | 1.34 | 153 | 6.4    | 275 | 8.59   |   |
| 2910 | Ptbp2          | 1.34 | 231 | 6.47   | 373 | 8.68   |   |
| 2911 | Fam65a         | 1.34 | 214 | 9.05   | 360 | 12.14  |   |
| 2912 | Nck1           | 1.34 | 58  | 7.06   | 90  | 9.47   |   |
| 2913 | Dnm1l          | 1.34 | 149 | 13.31  | 230 | 17.85  |   |
| 2914 | U2surp         | 1.34 | 138 | 11.37  | 226 | 15.24  |   |
| 2915 | Smarcc1        | 1.34 | 387 | 25.98  | 656 | 34.83  |   |
| 2916 | Cox5a          | 1.34 | 75  | 52.5   | 142 | 70.38  |   |
| 2917 | Elf4           | 1.34 | 62  | 8.58   | 108 | 11.5   |   |
| 2918 | Sft2d1         | 1.34 | 101 | 20.73  | 185 | 27.79  |   |
| 2919 | Kpna1          | 1.34 | 127 | 7.96   | 233 | 10.68  |   |
| 2920 | Thoc2          | 1.34 | 196 | 11.64  | 363 | 15.6   |   |
| 2921 | Lrrc1          | 1.34 | 87  | 6.47   | 140 | 8.67   |   |
| 2922 | Pdcd10         | 1.34 | 123 | 22.45  | 214 | 30.08  |   |
| 2923 | RT1-A2         | 1.34 | 51  | 21.88  | 77  | 29.32  |   |
| 2924 | Nop14          | 1.34 | 80  | 6.57   | 144 | 8.8    |   |
| 2925 | AABR07012475.2 | 1.34 | 22  | 2.65   | 41  | 3.55   |   |
| 2926 | Prpf38a        | 1.34 | 64  | 10.49  | 130 | 14.06  |   |
| 2927 | Mdp1           | 1.34 | 26  | 4.59   | 44  | 6.14   |   |
| 2928 | Fermt2         | 1.34 | 370 | 33.38  | 686 | 44.7   |   |
| 2929 | Skil           | 1.34 | 137 | 16.47  | 265 | 22.06  |   |
| 2930 | Ric8a          | 1.34 | 157 | 21.8   | 281 | 29.19  |   |
| 2931 | Zmynd11        | 1.34 | 314 | 21.46  | 550 | 28.73  |   |
| 2932 | Adck2          | 1.34 | 50  | 6.21   | 87  | 8.31   |   |
| 2933 | Smug1          | 1.34 | 46  | 4.58   | 78  | 6.13   |   |
| 2934 | Ddx46          | 1.34 | 258 | 19.14  | 428 | 25.62  |   |
| 2935 | Dctn4          | 1.34 | 192 | 34.37  | 323 | 45.99  |   |
| 2936 | Cyp4v3         | 1.34 | 21  | 1.87   | 41  | 2.5    |   |
| 2937 | LOC100910872   | 1.34 | 8   | 4.83   | 19  | 6.47   |   |
| 2938 | Mycn           | 1.34 | 40  | 5.27   | 71  | 7.05   |   |
| 2939 | Ythdc2         | 1.34 | 43  | 3.59   | 69  | 4.81   |   |
| 2940 | Dcp2_1         | 1.34 | 18  | 7.23   | 25  | 9.67   |   |
| 2941 | SNORD75_2      | 1.34 | 37  | 221.91 | 66  | 296.89 |   |
| 2942 | Rad23b         | 1.34 | 482 | 59.71  | 855 | 79.86  |   |
| 2943 | Nr2c1          | 1.34 | 161 | 6.47   | 294 | 8.65   |   |
| 2944 | Camsap2        | 1.34 | 258 | 10.35  | 484 | 13.83  |   |
| 2945 | Ddhd1          | 1.34 | 71  | 3.51   | 95  | 4.69   |   |
| 2946 | ENSRNOG0000006 | 1.34 | 113 | 11.36  | 211 | 15.17  |   |
| 2947 | Tada1          | 1.34 | 64  | 7.55   | 109 | 10.09  |   |
| 2948 | AABR07029195.1 | 1.34 | 2   | 6.23   | 4   | 8.32   |   |
| 2949 | Avpi1          | 1.34 | 31  | 9.35   | 54  | 12.49  |   |
| 2950 | Dzank1         | 1.34 | 34  | 2      | 45  | 2.68   |   |
| 2951 | Jdp2           | 1.34 | 22  | 4.38   | 48  | 5.85   |   |
| 2952 | Ube2f          | 1.34 | 32  | 9.08   | 56  | 12.13  |   |
| 2953 | Kihl2          | 1.34 | 71  | 5.03   | 139 | 6.71   |   |
| 2954 | Lpgat1         | 1.34 | 61  | 5.39   | 109 | 7.2    |   |
| 2955 | Mettl1         | 1.34 | 17  | 2.43   | 29  | 3.25   |   |
| 2956 | Ptk2b          | 1.34 | 38  | 2.58   | 79  | 3.44   |   |
| 2957 | Swt1           | 1.34 | 92  | 4.13   | 160 | 5.52   |   |

Supplemental Table 3  
 FSH + Ad-E versus FSH + Ad-FOXO1(A3), 24 hours

|      | A          | B    | C   | D     | E   | F     | G |
|------|------------|------|-----|-------|-----|-------|---|
| 2958 | Sdcbp      | 1.33 | 341 | 45.32 | 613 | 60.49 |   |
| 2959 | Thada      | 1.33 | 154 | 4.27  | 293 | 5.7   |   |
| 2960 | Pitpna     | 1.33 | 126 | 22.42 | 234 | 29.91 |   |
| 2961 | Fxr1       | 1.33 | 39  | 12.78 | 56  | 17.04 |   |
| 2962 | Gpatch8    | 1.33 | 423 | 15.13 | 726 | 20.17 |   |
| 2963 | Hcfc2      | 1.33 | 83  | 7.68  | 162 | 10.23 |   |
| 2964 | Zp2        | 1.33 | 30  | 3.74  | 52  | 4.99  |   |
| 2965 | Idi1       | 1.33 | 144 | 17.77 | 249 | 23.69 |   |
| 2966 | Zfp386     | 1.33 | 147 | 7.05  | 234 | 9.39  |   |
| 2967 | Rngtt      | 1.33 | 115 | 4.82  | 178 | 6.42  |   |
| 2968 | Ptpn1      | 1.33 | 120 | 18.41 | 219 | 24.52 |   |
| 2969 | Stam       | 1.33 | 108 | 10.5  | 177 | 13.99 |   |
| 2970 | Ankhd1     | 1.33 | 395 | 11.36 | 668 | 15.12 |   |
| 2971 | Upf3a      | 1.33 | 70  | 11.49 | 133 | 15.3  |   |
| 2972 | Uba5       | 1.33 | 116 | 10.4  | 198 | 13.84 |   |
| 2973 | Whsc1l1    | 1.33 | 259 | 9.69  | 489 | 12.9  |   |
| 2974 | Galnt1     | 1.33 | 226 | 38.05 | 386 | 50.61 |   |
| 2975 | Spcs3      | 1.33 | 219 | 22.99 | 395 | 30.58 |   |
| 2976 | B3galnt1   | 1.33 | 48  | 8.63  | 103 | 11.47 |   |
| 2977 | Cryl1      | 1.33 | 16  | 2.24  | 20  | 2.97  |   |
| 2978 | Hdac11     | 1.33 | 15  | 1.3   | 21  | 1.72  |   |
| 2979 | Ostf1      | 1.33 | 35  | 8.33  | 57  | 11.07 |   |
| 2980 | Sesn1      | 1.33 | 98  | 7.56  | 149 | 10.04 |   |
| 2981 | Tsfm       | 1.33 | 40  | 5.83  | 46  | 7.75  |   |
| 2982 | Denr       | 1.33 | 51  | 16.8  | 120 | 22.33 |   |
| 2983 | Il16       | 1.33 | 10  | 0.65  | 23  | 0.87  |   |
| 2984 | Mrs2       | 1.33 | 25  | 3.34  | 52  | 4.44  |   |
| 2985 | Npepo      | 1.33 | 99  | 1.19  | 198 | 1.58  |   |
| 2986 | Rmdn1      | 1.33 | 69  | 3.22  | 104 | 4.29  |   |
| 2987 | Rufy2      | 1.33 | 1   | 1.79  | 3   | 2.38  |   |
| 2988 | Ttpal      | 1.33 | 110 | 7.74  | 203 | 10.29 |   |
| 2989 | Dyrk2      | 1.33 | 116 | 7.11  | 208 | 9.44  |   |
| 2990 | Zfhx3      | 1.33 | 149 | 3.62  | 249 | 4.81  |   |
| 2991 | Camsap1    | 1.33 | 256 | 10.69 | 425 | 14.2  |   |
| 2992 | Chordc1    | 1.33 | 79  | 7.55  | 137 | 10.03 |   |
| 2993 | Zfp318     | 1.33 | 164 | 6.2   | 271 | 8.24  |   |
| 2994 | Klhdc8b    | 1.33 | 62  | 6.93  | 105 | 9.2   |   |
| 2995 | Snx12      | 1.33 | 154 | 12.56 | 271 | 16.67 |   |
| 2996 | Atp11b     | 1.33 | 104 | 8.57  | 203 | 11.37 |   |
| 2997 | Zfp618     | 1.33 | 89  | 4.62  | 168 | 6.13  |   |
| 2998 | Pdp1       | 1.33 | 102 | 13.32 | 183 | 17.68 |   |
| 2999 | Pdzd2      | 1.33 | 180 | 4.46  | 309 | 5.91  |   |
| 3000 | RGD1309621 | 1.33 | 213 | 14.39 | 377 | 19.09 |   |
| 3001 | Uba6       | 1.33 | 552 | 24.09 | 989 | 31.95 |   |
| 3002 | Atp2c1     | 1.33 | 178 | 18.57 | 303 | 24.63 |   |
| 3003 | Tpr        | 1.33 | 390 | 18.23 | 696 | 24.17 |   |
| 3004 | Tmem245    | 1.33 | 239 | 22.13 | 430 | 29.33 |   |
| 3005 | Ddx20      | 1.33 | 75  | 8.53  | 134 | 11.31 |   |
| 3006 | Prim2      | 1.33 | 58  | 3.64  | 90  | 4.82  |   |
| 3007 | Ttc33      | 1.33 | 32  | 4.45  | 55  | 5.9   |   |
| 3008 | Eps8       | 1.32 | 106 | 7.29  | 196 | 9.66  |   |
| 3009 | Secisbp2l  | 1.32 | 543 | 27.36 | 937 | 36.24 |   |
| 3010 | Arhgef1    | 1.32 | 273 | 25.12 | 458 | 33.26 |   |
| 3011 | Lrrc16a    | 1.32 | 191 | 7.15  | 362 | 9.46  |   |



Supplemental Table 3  
 FSH + Ad-E versus FSH + Ad-FOXO1(A3), 24 hours

|      | A             | B    | C   | D      | E    | F      | G |
|------|---------------|------|-----|--------|------|--------|---|
| 3012 | Zbtb2         | 1.32 | 35  | 4.04   | 64   | 5.35   |   |
| 3013 | Zfp467        | 1.32 | 77  | 5.96   | 128  | 7.9    |   |
| 3014 | Sgce          | 1.32 | 138 | 25.31  | 249  | 33.52  |   |
| 3015 | Rere          | 1.32 | 933 | 26.41  | 1680 | 34.97  |   |
| 3016 | Cdc42         | 1.32 | 297 | 98.29  | 563  | 130.14 |   |
| 3017 | Tmem68        | 1.32 | 77  | 6.52   | 134  | 8.64   |   |
| 3018 | Cmtm7         | 1.32 | 158 | 12.2   | 294  | 16.15  |   |
| 3019 | Otud7b        | 1.32 | 175 | 8.04   | 332  | 10.64  |   |
| 3020 | Mlx           | 1.32 | 83  | 13.89  | 147  | 18.38  |   |
| 3021 | Khdrbs1       | 1.32 | 362 | 46.26  | 641  | 61.22  |   |
| 3022 | Snx16         | 1.32 | 25  | 2.03   | 49   | 2.69   |   |
| 3023 | Ccnj          | 1.32 | 0   | 1.12   | 0    | 1.49   |   |
| 3024 | Jade3         | 1.32 | 83  | 9.98   | 162  | 13.2   |   |
| 3025 | Klf15         | 1.32 | 68  | 5.82   | 141  | 7.69   |   |
| 3026 | LOC679894     | 1.32 | 26  | 1.82   | 46   | 2.41   |   |
| 3027 | Nudcd3        | 1.32 | 16  | 8.56   | 25   | 11.32  |   |
| 3028 | Pde5a         | 1.32 | 34  | 1.39   | 62   | 1.83   |   |
| 3029 | Vps33b        | 1.32 | 38  | 3.83   | 64   | 5.07   |   |
| 3030 | Wipi2         | 1.32 | 90  | 12.6   | 147  | 16.66  |   |
| 3031 | Tcf7l2        | 1.32 | 199 | 12.57  | 342  | 16.62  |   |
| 3032 | Zfp238        | 1.32 | 82  | 18.92  | 144  | 25.02  |   |
| 3033 | Arhgef10l     | 1.32 | 160 | 11.3   | 258  | 14.93  |   |
| 3034 | Erf           | 1.32 | 65  | 5.46   | 107  | 7.22   |   |
| 3035 | Rn60_X_0746.3 | 1.32 | 56  | 27.97  | 99   | 36.96  |   |
| 3036 | 3110040N11Rik | 1.32 | 44  | 7.6    | 60   | 10.05  |   |
| 3037 | Arhgap10      | 1.32 | 119 | 5.95   | 209  | 7.86   |   |
| 3038 | Bdp1          | 1.32 | 141 | 5.18   | 252  | 6.85   |   |
| 3039 | Csrp2         | 1.32 | 478 | 114.35 | 877  | 151.08 |   |
| 3040 | St6gal1       | 1.32 | 112 | 8.9    | 199  | 11.76  |   |
| 3041 | Abhd6         | 1.32 | 127 | 9.6    | 259  | 12.68  |   |
| 3042 | Slco5a1       | 1.32 | 134 | 6.3    | 299  | 8.32   |   |
| 3043 | Zfat          | 1.32 | 58  | 2.44   | 117  | 3.23   |   |
| 3044 | Tagln2        | 1.32 | 434 | 121.43 | 785  | 160.29 |   |
| 3045 | Pomp          | 1.32 | 0   | 17.49  | 0    | 23.07  |   |
| 3046 | Taf2          | 1.32 | 139 | 8.55   | 243  | 11.27  |   |
| 3047 | Fam175a       | 1.32 | 45  | 4.26   | 75   | 5.62   |   |
| 3048 | Klhl23        | 1.32 | 54  | 3.48   | 92   | 4.59   |   |
| 3049 | RGD1565183    | 1.32 | 8   | 13.27  | 15   | 17.5   |   |
| 3050 | RGD1305178    | 1.32 | 64  | 10.07  | 108  | 13.28  |   |
| 3051 | Rpgr          | 1.32 | 38  | 2.31   | 55   | 3.04   |   |
| 3052 | Ttk           | 1.32 | 25  | 1.82   | 44   | 2.4    |   |
| 3053 | Cep120        | 1.32 | 228 | 12.4   | 433  | 16.35  |   |
| 3054 | Ascc3         | 1.32 | 179 | 5.98   | 316  | 7.89   |   |
| 3055 | Arhgef40      | 1.32 | 180 | 9      | 314  | 11.86  |   |
| 3056 | Cep63         | 1.32 | 78  | 4.97   | 126  | 6.55   |   |
| 3057 | Mterfd1       | 1.32 | 68  | 3.69   | 136  | 4.86   |   |
| 3058 | Zranb1        | 1.32 | 105 | 11.47  | 196  | 15.11  |   |
| 3059 | Eif2s1        | 1.32 | 152 | 32.08  | 271  | 42.26  |   |
| 3060 | Casc3         | 1.32 | 231 | 18.49  | 408  | 24.36  |   |
| 3061 | Phf3          | 1.32 | 225 | 9.49   | 400  | 12.5   |   |
| 3062 | Hdac10        | 1.32 | 30  | 3.57   | 46   | 4.7    |   |
| 3063 | Uchl5         | 1.32 | 53  | 3.61   | 104  | 4.76   |   |
| 3064 | Znhit6        | 1.32 | 31  | 4.87   | 65   | 6.42   |   |
| 3065 | Zufsp         | 1.32 | 56  | 3.77   | 84   | 4.96   |   |

Supplemental Table 3  
 FSH + Ad-E versus FSH + Ad-FOXO1(A3), 24 hours

|      | A              | B    | C    | D      | E    | F      | G |
|------|----------------|------|------|--------|------|--------|---|
| 3066 | Sostdc1        | 1.32 | 284  | 57.71  | 501  | 76     |   |
| 3067 | Pparg          | 1.32 | 244  | 21.15  | 434  | 27.85  |   |
| 3068 | Edrf1          | 1.32 | 76   | 3.07   | 122  | 4.04   |   |
| 3069 | Ubxn7          | 1.32 | 51   | 19.68  | 91   | 25.9   |   |
| 3070 | Hsd17b4        | 1.32 | 233  | 28.35  | 425  | 37.32  |   |
| 3071 | Eif5           | 1.32 | 235  | 41.42  | 427  | 54.52  |   |
| 3072 | Cdc14a         | 1.32 | 67   | 2.02   | 113  | 2.66   |   |
| 3073 | Irf9           | 1.32 | 29   | 5.66   | 53   | 7.45   |   |
| 3074 | Sifn5          | 1.32 | 79   | 4.61   | 139  | 6.06   |   |
| 3075 | Bcl2l13        | 1.32 | 113  | 16.93  | 200  | 22.26  |   |
| 3076 | Cd14           | 1.32 | 54   | 11.51  | 96   | 15.14  |   |
| 3077 | Rmi1           | 1.32 | 54   | 9.1    | 95   | 11.97  |   |
| 3078 | Shfm1          | 1.32 | 63   | 25.97  | 114  | 34.15  |   |
| 3079 | Dedd           | 1.32 | 59   | 17.32  | 99   | 22.78  |   |
| 3080 | Rnf2           | 1.32 | 153  | 20.62  | 262  | 27.11  |   |
| 3081 | Fam193a        | 1.32 | 288  | 16.69  | 504  | 21.95  |   |
| 3082 | Fggy           | 1.31 | 70   | 5.62   | 125  | 7.39   |   |
| 3083 | Ndufv3         | 1.31 | 99   | 20.17  | 157  | 26.51  |   |
| 3084 | Stk39          | 1.31 | 110  | 5.49   | 210  | 7.22   |   |
| 3085 | Atpif1         | 1.31 | 68   | 43.42  | 128  | 57.07  |   |
| 3086 | Cab39l         | 1.31 | 160  | 12.18  | 267  | 16     |   |
| 3087 | Hibch          | 1.31 | 50   | 6.14   | 97   | 8.06   |   |
| 3088 | Tapt1          | 1.31 | 118  | 9.56   | 193  | 12.56  |   |
| 3089 | Chmp3          | 1.31 | 59   | 14.29  | 102  | 18.78  |   |
| 3090 | Emp1           | 1.31 | 394  | 49.44  | 696  | 64.95  |   |
| 3091 | Arnt           | 1.31 | 205  | 21.93  | 333  | 28.81  |   |
| 3092 | Col4a3bp       | 1.31 | 149  | 7.53   | 249  | 9.89   |   |
| 3093 | Hsp90aa1       | 1.31 | 0    | 6.08   | 0    | 7.99   |   |
| 3094 | Klhl8          | 1.31 | 51   | 4.03   | 92   | 5.3    |   |
| 3095 | Specc1l        | 1.31 | 323  | 14.28  | 539  | 18.75  |   |
| 3096 | Stag2          | 1.31 | 293  | 14.99  | 529  | 19.67  |   |
| 3097 | Akap9          | 1.31 | 421  | 10.37  | 721  | 13.61  |   |
| 3098 | Ddb1           | 1.31 | 1875 | 157.27 | 3341 | 206.41 |   |
| 3099 | Ppid           | 1.31 | 60   | 17.24  | 115  | 22.62  |   |
| 3100 | Vps13c         | 1.31 | 134  | 3.42   | 227  | 4.49   |   |
| 3101 | Ttl            | 1.31 | 78   | 9.58   | 123  | 12.56  |   |
| 3102 | Ddhd2          | 1.31 | 97   | 8.74   | 158  | 11.46  |   |
| 3103 | Ufsp2          | 1.31 | 85   | 13.44  | 144  | 17.62  |   |
| 3104 | Cbl            | 1.31 | 91   | 7.73   | 158  | 10.14  |   |
| 3105 | Tfdp1          | 1.31 | 173  | 19.78  | 297  | 25.93  |   |
| 3106 | Smurf1         | 1.31 | 207  | 10.47  | 347  | 13.72  |   |
| 3107 | Casp8ap2       | 1.31 | 83   | 3.78   | 152  | 4.96   |   |
| 3108 | Ctnna3_1       | 1.31 | 59   | 15.75  | 115  | 20.65  |   |
| 3109 | Unc119         | 1.31 | 84   | 21.78  | 141  | 28.55  |   |
| 3110 | AABR07043748.1 | 1.31 | 29   | 7.84   | 46   | 10.28  |   |
| 3111 | Gcc2           | 1.31 | 103  | 4.89   | 183  | 6.41   |   |
| 3112 | Cnot6          | 1.31 | 316  | 33.31  | 492  | 43.66  |   |
| 3113 | Tet3           | 1.31 | 205  | 7.45   | 328  | 9.76   |   |
| 3114 | Med13          | 1.31 | 477  | 20.88  | 817  | 27.32  |   |
| 3115 | Elmod3         | 1.31 | 55   | 3.28   | 81   | 4.29   |   |
| 3116 | Fra10ac1       | 1.31 | 20   | 2.16   | 38   | 2.83   |   |
| 3117 | Fsd1           | 1.31 | 5    | 0.31   | 10   | 0.4    |   |
| 3118 | Gk             | 1.31 | 34   | 1.36   | 56   | 1.78   |   |
| 3119 | Herc4          | 1.31 | 155  | 8.31   | 250  | 10.87  |   |

Supplemental Table 3  
 FSH + Ad-E versus FSH + Ad-FOXO1(A3), 24 hours

|      | A               | B    | C   | D     | E   | F     | G |
|------|-----------------|------|-----|-------|-----|-------|---|
| 3120 | Mrpl33          | 1.31 | 22  | 18.41 | 42  | 24.09 |   |
| 3121 | Rn60_20_0046.5  | 1.31 | 4   | 2.27  | 7   | 2.97  |   |
| 3122 | Sv2a            | 1.31 | 14  | 1.02  | 24  | 1.33  |   |
| 3123 | AABR07011013.1  | 1.31 | 12  | 2.29  | 14  | 3     |   |
| 3124 | AABR07072711.1  | 1.31 | 2   | 0.41  | 3   | 0.53  |   |
| 3125 | AC114446.1      | 1.31 | 2   | 2.38  | 2   | 3.11  |   |
| 3126 | Amh             | 1.31 | 8   | 1.74  | 14  | 2.28  |   |
| 3127 | Ankrd29_1       | 1.31 | 2   | 1.76  | 7   | 2.31  |   |
| 3128 | Bmp3            | 1.31 | 5   | 0.28  | 9   | 0.36  |   |
| 3129 | Casp6           | 1.31 | 10  | 10.5  | 26  | 13.74 |   |
| 3130 | Cby1            | 1.31 | 18  | 9.34  | 27  | 12.22 |   |
| 3131 | Cdca7l          | 1.31 | 32  | 3.36  | 50  | 4.39  |   |
| 3132 | Cnksr2          | 1.31 | 10  | 0.29  | 25  | 0.37  |   |
| 3133 | Dtwd1           | 1.31 | 13  | 1.86  | 25  | 2.43  |   |
| 3134 | Eif1a           | 1.31 | 90  | 15.06 | 153 | 19.71 |   |
| 3135 | Endov           | 1.31 | 26  | 3.21  | 42  | 4.2   |   |
| 3136 | Enox2           | 1.31 | 12  | 0.49  | 20  | 0.64  |   |
| 3137 | Enpp1           | 1.31 | 59  | 4.95  | 105 | 6.47  |   |
| 3138 | ENSRNOG00000053 | 1.31 | 0   | 1.5   | 0   | 1.96  |   |
| 3139 | Fam115c_2       | 1.31 | 0   | 1.47  | 1   | 1.92  |   |
| 3140 | Fam131b         | 1.31 | 4   | 0.36  | 9   | 0.47  |   |
| 3141 | Fndc5           | 1.31 | 4   | 0.66  | 10  | 0.87  |   |
| 3142 | Hyls1           | 1.31 | 8   | 3.07  | 14  | 4.02  |   |
| 3143 | Ifi44l          | 1.31 | 5   | 1.09  | 8   | 1.42  |   |
| 3144 | Larp7           | 1.31 | 64  | 12.1  | 110 | 15.83 |   |
| 3145 | LOC100361180    | 1.31 | 1   | 7.05  | 1   | 9.22  |   |
| 3146 | Mapk8           | 1.31 | 110 | 7.88  | 162 | 10.3  |   |
| 3147 | Mina            | 1.31 | 10  | 2.08  | 18  | 2.72  |   |
| 3148 | Nol3            | 1.31 | 4   | 0.96  | 7   | 1.25  |   |
| 3149 | Pcdhb2          | 1.31 | 4   | 0.6   | 7   | 0.79  |   |
| 3150 | Pdgfb           | 1.31 | 12  | 1.33  | 20  | 1.73  |   |
| 3151 | Pdzk1           | 1.31 | 101 | 2.19  | 153 | 2.87  |   |
| 3152 | Plch1           | 1.31 | 7   | 0.22  | 11  | 0.28  |   |
| 3153 | Plcl2           | 1.31 | 136 | 7.35  | 224 | 9.62  |   |
| 3154 | Plp1            | 1.31 | 27  | 2.86  | 50  | 3.74  |   |
| 3155 | Ppl             | 1.31 | 10  | 0.46  | 24  | 0.6   |   |
| 3156 | Pusl1           | 1.31 | 13  | 1.42  | 17  | 1.86  |   |
| 3157 | Pycard          | 1.31 | 4   | 1.56  | 7   | 2.04  |   |
| 3158 | RGD1564688      | 1.31 | 0   | 2.89  | 1   | 3.78  |   |
| 3159 | Slc51a          | 1.31 | 41  | 0.9   | 24  | 1.18  |   |
| 3160 | Spn             | 1.31 | 4   | 0.37  | 7   | 0.49  |   |
| 3161 | Vipr2           | 1.31 | 15  | 0.33  | 13  | 0.44  |   |
| 3162 | Zfp1            | 1.31 | 14  | 3.59  | 26  | 4.7   |   |
| 3163 | Zfp354c         | 1.31 | 109 | 5.28  | 185 | 6.91  |   |
| 3164 | AABR07007130.1  | 1.31 | 7   | 1.31  | 13  | 1.71  |   |
| 3165 | Actr6           | 1.31 | 86  | 13.44 | 144 | 17.59 |   |
| 3166 | Ccdc86          | 1.31 | 51  | 10.75 | 94  | 14.07 |   |
| 3167 | Cd93            | 1.31 | 4   | 0.3   | 7   | 0.4   |   |
| 3168 | Fbxl15          | 1.31 | 4   | 1.08  | 7   | 1.41  |   |
| 3169 | Hecw2           | 1.31 | 15  | 0.27  | 20  | 0.36  |   |
| 3170 | Ica1            | 1.31 | 48  | 3.87  | 101 | 5.06  |   |
| 3171 | Rimbp3          | 1.31 | 4   | 0.27  | 7   | 0.35  |   |
| 3172 | Sntb1           | 1.31 | 43  | 1.36  | 49  | 1.78  |   |
| 3173 | Itns2           | 1.31 | 199 | 7.77  | 349 | 10.15 |   |

Supplemental Table 3  
 FSH + Ad-E versus FSH + Ad-FOXO1(A3), 24 hours

|      | A            | B    | C    | D      | E    | F      | G |
|------|--------------|------|------|--------|------|--------|---|
| 3174 | Ube4a        | 1.31 | 368  | 18.63  | 631  | 24.34  |   |
| 3175 | Zbed5        | 1.31 | 41   | 13.83  | 49   | 18.07  |   |
| 3176 | Dctn1        | 1.31 | 359  | 28.83  | 626  | 37.66  |   |
| 3177 | Stmn1        | 1.31 | 226  | 63.04  | 425  | 82.33  |   |
| 3178 | Ncoa6        | 1.31 | 293  | 13.85  | 510  | 18.08  |   |
| 3179 | LOC100363800 | 1.31 | 74   | 92.08  | 126  | 120.18 |   |
| 3180 | Erc1         | 1.3  | 289  | 9.09   | 493  | 11.87  |   |
| 3181 | Cdk11b       | 1.3  | 179  | 19.83  | 315  | 25.86  |   |
| 3182 | Acer3        | 1.3  | 70   | 4.06   | 117  | 5.3    |   |
| 3183 | Pole4        | 1.3  | 46   | 6.54   | 87   | 8.53   |   |
| 3184 | Kif1b        | 1.3  | 826  | 13.46  | 1377 | 17.55  |   |
| 3185 | Wdr1         | 1.3  | 427  | 50.78  | 770  | 66.2   |   |
| 3186 | Fhod1        | 1.3  | 101  | 7.61   | 183  | 9.91   |   |
| 3187 | Bcl2l2       | 1.3  | 120  | 11.62  | 200  | 15.15  |   |
| 3188 | Ncbp2_1      | 1.3  | 68   | 22.25  | 127  | 29     |   |
| 3189 | Paics        | 1.3  | 78   | 27.28  | 159  | 35.56  |   |
| 3190 | Rdx          | 1.3  | 165  | 28.13  | 282  | 36.65  |   |
| 3191 | Steap2       | 1.3  | 42   | 3.64   | 70   | 4.75   |   |
| 3192 | Lime1        | 1.3  | 39   | 5.94   | 61   | 7.74   |   |
| 3193 | Tgfbrap1     | 1.3  | 117  | 6.01   | 188  | 7.82   |   |
| 3194 | Trmt44       | 1.3  | 53   | 1.58   | 100  | 2.06   |   |
| 3195 | Zfyve27      | 1.3  | 133  | 7.46   | 235  | 9.7    |   |
| 3196 | Llgl2        | 1.3  | 37   | 2.29   | 62   | 2.99   |   |
| 3197 | Mettl14      | 1.3  | 70   | 7.31   | 115  | 9.52   |   |
| 3198 | Sh3bgrl      | 1.3  | 69   | 28.58  | 116  | 37.2   |   |
| 3199 | Akr1c14      | 1.3  | 3577 | 542.17 | 6302 | 705.52 |   |
| 3200 | Sec24a       | 1.3  | 179  | 10.21  | 251  | 13.29  |   |
| 3201 | RGD1308428   | 1.3  | 189  | 7.73   | 320  | 10.06  |   |
| 3202 | Aifm1        | 1.3  | 138  | 15.5   | 237  | 20.16  |   |
| 3203 | Adam23       | 1.3  | 37   | 2.9    | 81   | 3.76   |   |
| 3204 | Frrs1        | 1.3  | 25   | 4.68   | 43   | 6.09   |   |
| 3205 | Tm2d2        | 1.3  | 76   | 19.43  | 125  | 25.26  |   |
| 3206 | Snx18        | 1.3  | 184  | 14.83  | 332  | 19.28  |   |
| 3207 | Prkci        | 1.3  | 146  | 10.42  | 265  | 13.54  |   |
| 3208 | Arf2         | 1.3  | 43   | 6.99   | 82   | 9.08   |   |
| 3209 | Fstl1        | 1.3  | 431  | 33.08  | 762  | 42.98  |   |
| 3210 | Rnf146       | 1.3  | 65   | 11.8   | 125  | 15.34  |   |
| 3211 | Zc3h11a      | 1.3  | 678  | 45.61  | 1059 | 59.25  |   |
| 3212 | Cln8         | 1.3  | 44   | 6.19   | 73   | 8.04   |   |
| 3213 | Atp5i        | 1.3  | 19   | 23.8   | 39   | 30.91  |   |
| 3214 | Ddr1         | 1.3  | 210  | 17.34  | 374  | 22.51  |   |
| 3215 | RGD1565498   | 1.3  | 41   | 4.21   | 72   | 5.47   |   |
| 3216 | Ireb2        | 1.3  | 182  | 14.99  | 311  | 19.45  |   |
| 3217 | Cwf19l2      | 1.3  | 61   | 1.85   | 84   | 2.41   |   |
| 3218 | Nedd4l       | 1.3  | 99   | 2.86   | 128  | 3.72   |   |
| 3219 | Mus81        | 1.3  | 49   | 6      | 77   | 7.78   |   |
| 3220 | Ccdc136      | 1.3  | 82   | 4.62   | 150  | 6      |   |
| 3221 | Msi1         | 1.3  | 63   | 6.13   | 112  | 7.95   |   |
| 3222 | Gak          | 1.3  | 234  | 17.16  | 411  | 22.25  |   |
| 3223 | Ripk1        | 1.3  | 123  | 9.04   | 236  | 11.72  |   |
| 3224 | Furin        | 1.3  | 587  | 48.91  | 1010 | 63.42  |   |
| 3225 | Bbs10        | 1.3  | 14   | 2.03   | 26   | 2.63   |   |
| 3226 | Cep162       | 1.3  | 27   | 0.92   | 48   | 1.2    |   |
| 3227 | Immt         | 1.3  | 251  | 24.45  | 402  | 31.69  |   |

Supplemental Table 3  
 FSH + Ad-E versus FSH + Ad-FOXO1(A3), 24 hours

|      | A              | B    | C   | D     | E    | F     | G |
|------|----------------|------|-----|-------|------|-------|---|
| 3228 | Kcnk6_1        | 1.3  | 12  | 2.34  | 20   | 3.04  |   |
| 3229 | Pmm2           | 1.3  | 138 | 17.7  | 213  | 22.94 |   |
| 3230 | Tcte1          | 1.3  | 17  | 1.11  | 26   | 1.43  |   |
| 3231 | Tlhc1          | 1.3  | 38  | 4     | 46   | 5.18  |   |
| 3232 | Zc3h13         | 1.3  | 231 | 11.8  | 397  | 15.28 |   |
| 3233 | Rnf111l_1      | 1.29 | 41  | 17.66 | 82   | 22.87 |   |
| 3234 | Bccip          | 1.29 | 53  | 10.88 | 96   | 14.09 |   |
| 3235 | Azin1          | 1.29 | 426 | 34.17 | 750  | 44.24 |   |
| 3236 | Gmcl1          | 1.29 | 139 | 11.5  | 251  | 14.89 |   |
| 3237 | Abi1           | 1.29 | 293 | 25.56 | 538  | 33.08 |   |
| 3238 | Rlim           | 1.29 | 14  | 14.44 | 29   | 18.69 |   |
| 3239 | Zfyve1         | 1.29 | 126 | 9.85  | 275  | 12.75 |   |
| 3240 | Fam120a        | 1.29 | 619 | 63.37 | 1047 | 81.98 |   |
| 3241 | Mpp5           | 1.29 | 230 | 13.6  | 393  | 17.59 |   |
| 3242 | Arhgap12       | 1.29 | 219 | 10.95 | 359  | 14.17 |   |
| 3243 | Mef2d          | 1.29 | 188 | 18.81 | 330  | 24.32 |   |
| 3244 | Sec11a         | 1.29 | 143 | 36.78 | 253  | 47.56 |   |
| 3245 | Cdkl5          | 1.29 | 235 | 7.25  | 314  | 9.37  |   |
| 3246 | Armcx3         | 1.29 | 164 | 15.67 | 295  | 20.25 |   |
| 3247 | Rnf14          | 1.29 | 232 | 18.63 | 445  | 24.07 |   |
| 3248 | Nasp           | 1.29 | 146 | 15.51 | 237  | 20.04 |   |
| 3249 | SunZ           | 1.29 | 154 | 20.9  | 259  | 27.01 |   |
| 3250 | Lrch2          | 1.29 | 44  | 5.15  | 78   | 6.65  |   |
| 3251 | AABR07019085.1 | 1.29 | 6   | 0.98  | 12   | 1.27  |   |
| 3252 | AABR07060519.1 | 1.29 | 23  | 3.56  | 46   | 4.59  |   |
| 3253 | Ankrd24        | 1.29 | 10  | 1.15  | 15   | 1.48  |   |
| 3254 | Hypk           | 1.29 | 18  | 20.42 | 30   | 26.38 |   |
| 3255 | Lgalsl         | 1.29 | 43  | 4.54  | 78   | 5.87  |   |
| 3256 | LOC691995      | 1.29 | 11  | 2.7   | 19   | 3.49  |   |
| 3257 | Pot1b          | 1.29 | 41  | 4.15  | 85   | 5.36  |   |
| 3258 | Tinf2          | 1.29 | 26  | 4.81  | 37   | 6.22  |   |
| 3259 | Zfp120         | 1.29 | 12  | 3.23  | 20   | 4.17  |   |
| 3260 | Cdc14b         | 1.29 | 245 | 8.05  | 476  | 10.39 |   |
| 3261 | Vps25          | 1.29 | 0   | 3.44  | 0    | 4.44  |   |
| 3262 | Lcor           | 1.29 | 198 | 3.04  | 384  | 3.92  |   |
| 3263 | Smad1          | 1.29 | 101 | 8.87  | 207  | 11.44 |   |
| 3264 | Rad54l2        | 1.29 | 45  | 5.1   | 55   | 6.58  |   |
| 3265 | Tmco1          | 1.29 | 64  | 16.99 | 116  | 21.93 |   |
| 3266 | Ggnbp2         | 1.29 | 164 | 15.01 | 261  | 19.36 |   |
| 3267 | Rhobtb1        | 1.29 | 510 | 23.14 | 906  | 29.84 |   |
| 3268 | Ndufaf4        | 1.29 | 29  | 3.44  | 50   | 4.43  |   |
| 3269 | Pick1          | 1.29 | 49  | 5.74  | 84   | 7.4   |   |
| 3270 | Plekhm3        | 1.29 | 100 | 3.68  | 174  | 4.74  |   |
| 3271 | Snopc5         | 1.29 | 29  | 8.79  | 50   | 11.33 |   |
| 3272 | Cul5           | 1.29 | 147 | 11.86 | 260  | 15.29 |   |
| 3273 | Pcf11          | 1.29 | 122 | 5.65  | 208  | 7.29  |   |
| 3274 | Ulk2           | 1.29 | 292 | 12.78 | 581  | 16.47 |   |
| 3275 | Ncapg2         | 1.29 | 61  | 2.31  | 92   | 2.98  |   |
| 3276 | Map3k3         | 1.29 | 216 | 12.51 | 369  | 16.11 |   |
| 3277 | Sdhaf2         | 1.29 | 82  | 12.69 | 131  | 16.35 |   |
| 3278 | Spag9          | 1.29 | 615 | 23.59 | 1005 | 30.39 |   |
| 3279 | Nln            | 1.29 | 113 | 8.97  | 205  | 11.55 |   |
| 3280 | Cdan1          | 1.29 | 83  | 7.02  | 140  | 9.04  |   |
| 3281 | Cfap97         | 1.29 | 43  | 3.2   | 56   | 4.12  |   |

Supplemental Table 3  
 FSH + Ad-E versus FSH + Ad-FOXO1(A3), 24 hours

|      | A              | B    | C    | D     | E    | F      | G |
|------|----------------|------|------|-------|------|--------|---|
| 3282 | Fam171a1       | 1.29 | 68   | 7.55  | 126  | 9.72   |   |
| 3283 | Mrps10         | 1.29 | 18   | 5.29  | 38   | 6.82   |   |
| 3284 | Scarf2         | 1.29 | 23   | 1.97  | 39   | 2.53   |   |
| 3285 | Wrap73         | 1.29 | 43   | 4.74  | 69   | 6.11   |   |
| 3286 | Zfp954         | 1.29 | 19   | 3.3   | 33   | 4.25   |   |
| 3287 | Adgre5         | 1.29 | 20   | 2.1   | 33   | 2.7    |   |
| 3288 | Gbp2           | 1.29 | 112  | 15.76 | 197  | 20.29  |   |
| 3289 | LOC100360056_1 | 1.29 | 1    | 35.61 | 2    | 45.85  |   |
| 3290 | Rps6ka6        | 1.29 | 21   | 1.5   | 33   | 1.93   |   |
| 3291 | Rapgef2        | 1.29 | 214  | 5.62  | 389  | 7.23   |   |
| 3292 | Snap29         | 1.29 | 139  | 12.31 | 256  | 15.85  |   |
| 3293 | Gmeb1          | 1.29 | 97   | 6.17  | 177  | 7.94   |   |
| 3294 | Asxl2          | 1.29 | 123  | 9.31  | 210  | 11.98  |   |
| 3295 | RGD1305089     | 1.29 | 67   | 6.67  | 106  | 8.58   |   |
| 3296 | Trnau1ap       | 1.29 | 52   | 4.07  | 91   | 5.24   |   |
| 3297 | Dnaaf2         | 1.29 | 28   | 3.64  | 49   | 4.68   |   |
| 3298 | Exd2           | 1.29 | 80   | 7.61  | 145  | 9.78   |   |
| 3299 | Ict1           | 1.29 | 36   | 10.93 | 55   | 14.06  |   |
| 3300 | Rn60_10_0890.5 | 1.29 | 0    | 6.18  | 0    | 7.95   |   |
| 3301 | Etv1           | 1.29 | 89   | 4.3   | 157  | 5.53   |   |
| 3302 | Ranbp10        | 1.29 | 178  | 8.3   | 298  | 10.67  |   |
| 3303 | Stx16          | 1.29 | 182  | 11.5  | 310  | 14.78  |   |
| 3304 | LOC100363675   | 1.29 | 174  | 48.28 | 228  | 62.05  |   |
| 3305 | Osbpl8         | 1.29 | 188  | 8.47  | 335  | 10.88  |   |
| 3306 | Ahsa2          | 1.28 | 79   | 9.2   | 128  | 11.83  |   |
| 3307 | Fytd1          | 1.28 | 109  | 25.4  | 180  | 32.63  |   |
| 3308 | Cyb5r4         | 1.28 | 96   | 11.53 | 165  | 14.82  |   |
| 3309 | Nfu1           | 1.28 | 69   | 12.73 | 113  | 16.35  |   |
| 3310 | Tcea1_2        | 1.28 | 80   | 26.1  | 142  | 33.52  |   |
| 3311 | Bmp2           | 1.28 | 557  | 56.57 | 1024 | 72.63  |   |
| 3312 | Tmem41b        | 1.28 | 67   | 7.07  | 113  | 9.07   |   |
| 3313 | Rab5c          | 1.28 | 219  | 36.88 | 366  | 47.35  |   |
| 3314 | Opa1           | 1.28 | 187  | 16.19 | 344  | 20.78  |   |
| 3315 | Fahd2a         | 1.28 | 59   | 9.27  | 103  | 11.9   |   |
| 3316 | Gfm1           | 1.28 | 61   | 7.5   | 106  | 9.62   |   |
| 3317 | Lpin2          | 1.28 | 77   | 3.6   | 121  | 4.62   |   |
| 3318 | LOC100910833   | 1.28 | 29   | 16.37 | 55   | 21.01  |   |
| 3319 | Ino80          | 1.28 | 146  | 7.35  | 283  | 9.43   |   |
| 3320 | Fnbp4          | 1.28 | 281  | 15.57 | 518  | 19.97  |   |
| 3321 | Antxr1         | 1.28 | 1025 | 85.78 | 1884 | 110.03 |   |
| 3322 | Sav1           | 1.28 | 100  | 16.26 | 180  | 20.86  |   |
| 3323 | Glud1          | 1.28 | 411  | 46.98 | 713  | 60.24  |   |
| 3324 | AABR07036374.1 | 1.28 | 12   | 1.72  | 16   | 2.2    |   |
| 3325 | BC068281       | 1.28 | 17   | 2.31  | 30   | 2.96   |   |
| 3326 | Camk2n1        | 1.28 | 7    | 6.2   | 16   | 7.94   |   |
| 3327 | Fam203a        | 1.28 | 24   | 3.37  | 40   | 4.32   |   |
| 3328 | Lrp12          | 1.28 | 243  | 20.08 | 444  | 25.73  |   |
| 3329 | Nfatc2         | 1.28 | 16   | 0.68  | 21   | 0.88   |   |
| 3330 | Plcb1          | 1.28 | 23   | 0.52  | 35   | 0.66   |   |
| 3331 | RGD1309748     | 1.28 | 323  | 11.88 | 657  | 15.22  |   |
| 3332 | Safb2          | 1.28 | 127  | 10.69 | 245  | 13.71  |   |
| 3333 | Supt3h         | 1.28 | 44   | 8.48  | 67   | 10.86  |   |
| 3334 | Thns1          | 1.28 | 7    | 0.95  | 12   | 1.22   |   |
| 3335 | Trmt2a         | 1.28 | 64   | 8.46  | 105  | 10.85  |   |

Supplemental Table 3  
 FSH + Ad-E versus FSH + Ad-FOXO1(A3), 24 hours

|      | A              | B    | C   | D      | E    | F      | G |
|------|----------------|------|-----|--------|------|--------|---|
| 3336 | Zfp472         | 1.28 | 14  | 2.5    | 24   | 3.2    |   |
| 3337 | Arpc1b         | 1.28 | 168 | 38.45  | 283  | 49.28  |   |
| 3338 | Btbd9          | 1.28 | 95  | 5.19   | 177  | 6.65   |   |
| 3339 | Cd1d1          | 1.28 | 22  | 4.14   | 36   | 5.31   |   |
| 3340 | Clip4          | 1.28 | 24  | 0.97   | 24   | 1.25   |   |
| 3341 | Imp3           | 1.28 | 21  | 5.27   | 36   | 6.75   |   |
| 3342 | Kazn           | 1.28 | 56  | 1.21   | 78   | 1.54   |   |
| 3343 | LOC100911660   | 1.28 | 0   | 1.99   | 0    | 2.55   |   |
| 3344 | LOC683897      | 1.28 | 33  | 2.09   | 46   | 2.68   |   |
| 3345 | Myo1f          | 1.28 | 20  | 0.66   | 43   | 0.85   |   |
| 3346 | RGD1565222     | 1.28 | 37  | 2.59   | 46   | 3.32   |   |
| 3347 | Serpinf1       | 1.28 | 9   | 1.64   | 14   | 2.1    |   |
| 3348 | Grb14          | 1.28 | 909 | 124.5  | 1677 | 159.54 |   |
| 3349 | Hnrpd          | 1.28 | 231 | 43.02  | 401  | 55.09  |   |
| 3350 | Mki67          | 1.28 | 141 | 4.84   | 241  | 6.19   |   |
| 3351 | AABR07070032.1 | 1.28 | 41  | 162.73 | 107  | 208.26 |   |
| 3352 | Fam208b        | 1.28 | 102 | 4.55   | 171  | 5.82   |   |
| 3353 | Atrx           | 1.28 | 316 | 7.62   | 527  | 9.74   |   |
| 3354 | Edem3          | 1.28 | 345 | 13.92  | 573  | 17.81  |   |
| 3355 | Atp5f1_2       | 1.28 | 0   | 14.57  | 0    | 18.63  |   |
| 3356 | Pbxip1         | 1.28 | 510 | 60.95  | 890  | 77.95  |   |
| 3357 | Acap3          | 1.28 | 43  | 3.09   | 72   | 3.95   |   |
| 3358 | Mrps31         | 1.28 | 70  | 8.81   | 108  | 11.26  |   |
| 3359 | Plekha8        | 1.28 | 74  | 3.75   | 130  | 4.8    |   |
| 3360 | Zfp422         | 1.28 | 103 | 15.23  | 170  | 19.47  |   |
| 3361 | Cds2           | 1.28 | 97  | 14.39  | 176  | 18.39  |   |
| 3362 | Ptprd          | 1.28 | 694 | 18.23  | 1204 | 23.29  |   |
| 3363 | Fam168a        | 1.28 | 297 | 17.56  | 491  | 22.44  |   |
| 3364 | Peli2          | 1.28 | 57  | 2.67   | 127  | 3.42   |   |
| 3365 | Ube2d2         | 1.28 | 197 | 46.34  | 302  | 59.19  |   |
| 3366 | Ppm1a          | 1.28 | 141 | 14.45  | 207  | 18.46  |   |
| 3367 | Tubb2a         | 1.28 | 133 | 28.44  | 219  | 36.31  |   |
| 3368 | Fem1c          | 1.28 | 121 | 6.2    | 213  | 7.91   |   |
| 3369 | Mvp            | 1.28 | 131 | 11.43  | 216  | 14.59  |   |
| 3370 | Zc3h15         | 1.28 | 127 | 23.95  | 194  | 30.56  |   |
| 3371 | Fubp1          | 1.28 | 308 | 26.37  | 510  | 33.64  |   |
| 3372 | Dlst           | 1.28 | 273 | 31.53  | 466  | 40.23  |   |
| 3373 | Sept2          | 1.28 | 595 | 76.14  | 1000 | 97.13  |   |
| 3374 | Ascc2          | 1.28 | 81  | 8.21   | 125  | 10.47  |   |
| 3375 | Tradd          | 1.28 | 17  | 4.62   | 30   | 5.89   |   |
| 3376 | Zfp839         | 1.28 | 32  | 2.24   | 38   | 2.86   |   |
| 3377 | LOC100911774   | 1.28 | 0   | 12.38  | 1    | 15.79  |   |
| 3378 | Lrrc71         | 1.28 | 33  | 2.85   | 56   | 3.64   |   |
| 3379 | Zscan22        | 1.28 | 18  | 4.14   | 33   | 5.28   |   |
| 3380 | Hectd1         | 1.28 | 594 | 23.26  | 983  | 29.66  |   |
| 3381 | Smad7          | 1.27 | 113 | 8.01   | 193  | 10.21  |   |
| 3382 | Prpf6          | 1.27 | 291 | 27.52  | 503  | 35.08  |   |
| 3383 | Ears2_1        | 1.27 | 22  | 8.12   | 48   | 10.35  |   |
| 3384 | Wwp1           | 1.27 | 57  | 5.22   | 81   | 6.65   |   |
| 3385 | Usp46          | 1.27 | 194 | 10.49  | 374  | 13.36  |   |
| 3386 | Brd7           | 1.27 | 181 | 21.57  | 297  | 27.48  |   |
| 3387 | Gyg1           | 1.27 | 63  | 10.97  | 112  | 13.97  |   |
| 3388 | Lrba           | 1.27 | 215 | 5.27   | 338  | 6.71   |   |
| 3389 | Fgfr1op2       | 1.27 | 92  | 7.93   | 157  | 10.1   |   |

Supplemental Table 3  
 FSH + Ad-E versus FSH + Ad-FOXO1(A3), 24 hours

|      | A            | B    | C    | D     | E    | F      | G |
|------|--------------|------|------|-------|------|--------|---|
| 3390 | Rarg         | 1.27 | 75   | 5.61  | 133  | 7.14   |   |
| 3391 | RGD1310081   | 1.27 | 81   | 2.94  | 139  | 3.74   |   |
| 3392 | Usp32        | 1.27 | 261  | 8.53  | 403  | 10.86  |   |
| 3393 | Atp5j        | 1.27 | 50   | 40.23 | 91   | 51.22  |   |
| 3394 | Rbm15b       | 1.27 | 110  | 15.09 | 188  | 19.2   |   |
| 3395 | Phf8         | 1.27 | 338  | 20.1  | 602  | 25.59  |   |
| 3396 | Gle1         | 1.27 | 132  | 13.6  | 213  | 17.31  |   |
| 3397 | Csgalnact2   | 1.27 | 93   | 10.36 | 182  | 13.18  |   |
| 3398 | RGD1307100   | 1.27 | 352  | 6.75  | 626  | 8.59   |   |
| 3399 | Sos2         | 1.27 | 284  | 9.5   | 432  | 12.08  |   |
| 3400 | Agl          | 1.27 | 87   | 3.83  | 153  | 4.87   |   |
| 3401 | Bend4        | 1.27 | 14   | 2.22  | 22   | 2.82   |   |
| 3402 | Ccdc93       | 1.27 | 44   | 4.57  | 77   | 5.81   |   |
| 3403 | Gadd45gip1   | 1.27 | 17   | 2.99  | 26   | 3.8    |   |
| 3404 | Katnbl1      | 1.27 | 31   | 3.31  | 40   | 4.2    |   |
| 3405 | Met          | 1.27 | 186  | 12.46 | 307  | 15.84  |   |
| 3406 | Rdh13        | 1.27 | 15   | 1.15  | 24   | 1.46   |   |
| 3407 | RGD1560225   | 1.27 | 15   | 0.82  | 28   | 1.04   |   |
| 3408 | Rnf34        | 1.27 | 83   | 11.08 | 135  | 14.09  |   |
| 3409 | Sp2          | 1.27 | 55   | 4.42  | 100  | 5.62   |   |
| 3410 | Srsf12       | 1.27 | 16   | 1.37  | 28   | 1.74   |   |
| 3411 | Cep250       | 1.27 | 108  | 4.32  | 182  | 5.49   |   |
| 3412 | Hmg20b       | 1.27 | 109  | 17.28 | 149  | 21.97  |   |
| 3413 | LOC100361056 | 1.27 | 32   | 7.93  | 57   | 10.08  |   |
| 3414 | Pcdh20       | 1.27 | 10   | 0.7   | 17   | 0.89   |   |
| 3415 | Ralgapa2     | 1.27 | 179  | 4.52  | 299  | 5.75   |   |
| 3416 | Acin1        | 1.27 | 1000 | 46.43 | 1620 | 59.01  |   |
| 3417 | Rlf          | 1.27 | 148  | 7.34  | 244  | 9.32   |   |
| 3418 | Als2         | 1.27 | 274  | 13.56 | 437  | 17.22  |   |
| 3419 | Ppp1cb       | 1.27 | 347  | 39.46 | 582  | 50.12  |   |
| 3420 | Ubap2        | 1.27 | 333  | 25.89 | 600  | 32.88  |   |
| 3421 | Ythdf3       | 1.27 | 276  | 19.98 | 472  | 25.37  |   |
| 3422 | Kdm5a        | 1.27 | 474  | 13.74 | 819  | 17.45  |   |
| 3423 | Itga6        | 1.27 | 784  | 43.47 | 1306 | 55.19  |   |
| 3424 | Lrrc42       | 1.27 | 180  | 24.75 | 278  | 31.42  |   |
| 3425 | Cfl1         | 1.27 | 910  | 360.1 | 1527 | 457.11 |   |
| 3426 | Npepps       | 1.27 | 318  | 20.74 | 518  | 26.33  |   |
| 3427 | Eif2ak4      | 1.27 | 180  | 5.2   | 255  | 6.6    |   |
| 3428 | Plekhn1      | 1.27 | 101  | 5.27  | 193  | 6.68   |   |
| 3429 | Sptan1       | 1.27 | 1455 | 61.89 | 2447 | 78.53  |   |
| 3430 | Fgfr1op      | 1.27 | 61   | 3.73  | 96   | 4.73   |   |
| 3431 | Akap10       | 1.27 | 131  | 6.9   | 194  | 8.76   |   |
| 3432 | Rps6kb1      | 1.27 | 96   | 8.89  | 174  | 11.27  |   |
| 3433 | Fam32a       | 1.27 | 137  | 22.67 | 220  | 28.75  |   |
| 3434 | Dip2c        | 1.27 | 169  | 8.38  | 288  | 10.63  |   |
| 3435 | Rab8a        | 1.27 | 131  | 23.89 | 223  | 30.28  |   |
| 3436 | Ttc14        | 1.27 | 67   | 5.72  | 97   | 7.25   |   |
| 3437 | Lsm6         | 1.27 | 15   | 3.93  | 28   | 4.98   |   |
| 3438 | Ptpn9        | 1.27 | 249  | 19.58 | 435  | 24.82  |   |
| 3439 | Sec63        | 1.27 | 302  | 15.57 | 482  | 19.73  |   |
| 3440 | Eif4g1       | 1.27 | 22   | 57.93 | 35   | 73.43  |   |
| 3441 | Cog6         | 1.27 | 192  | 19.95 | 346  | 25.29  |   |
| 3442 | RGD1560175   | 1.27 | 83   | 4.15  | 145  | 5.26   |   |
| 3443 | Card6        | 1.27 | 183  | 9.68  | 307  | 12.27  |   |



Supplemental Table 3  
 FSH + Ad-E versus FSH + Ad-FOXO1(A3), 24 hours

|      | A           | B    | C   | D      | E    | F      | G |
|------|-------------|------|-----|--------|------|--------|---|
| 3444 | Focad       | 1.27 | 90  | 2.98   | 156  | 3.77   |   |
| 3445 | Kansl3      | 1.27 | 286 | 18.75  | 470  | 23.76  |   |
| 3446 | Apaf1       | 1.27 | 142 | 7.78   | 262  | 9.85   |   |
| 3447 | Ttc3        | 1.27 | 625 | 26.66  | 1105 | 33.77  |   |
| 3448 | Pola1       | 1.27 | 71  | 2.45   | 104  | 3.1    |   |
| 3449 | Champ1      | 1.27 | 134 | 11.02  | 215  | 13.95  |   |
| 3450 | Dnajc8      | 1.27 | 116 | 22.92  | 205  | 29.03  |   |
| 3451 | Wdr43       | 1.27 | 124 | 10.34  | 208  | 13.1   |   |
| 3452 | Zfp526      | 1.27 | 61  | 4.61   | 103  | 5.84   |   |
| 3453 | Nktr        | 1.27 | 322 | 15.78  | 580  | 19.97  |   |
| 3454 | Kmt2c       | 1.27 | 25  | 9.15   | 37   | 11.57  |   |
| 3455 | Ppil4       | 1.27 | 80  | 7.99   | 129  | 10.11  |   |
| 3456 | Zbtb11      | 1.27 | 80  | 4.82   | 129  | 6.1    |   |
| 3457 | Dusp11_2    | 1.27 | 0   | 4.17   | 0    | 5.27   |   |
| 3458 | Ftsj3       | 1.27 | 81  | 9.9    | 135  | 12.52  |   |
| 3459 | Glod4       | 1.27 | 102 | 19.38  | 160  | 24.52  |   |
| 3460 | Impad1      | 1.27 | 2   | 13.86  | 3    | 17.54  |   |
| 3461 | Itpkb       | 1.27 | 97  | 5.98   | 155  | 7.57   |   |
| 3462 | Mapk1ip1    | 1.27 | 39  | 9.97   | 66   | 12.61  |   |
| 3463 | Mitd1       | 1.27 | 17  | 3.38   | 31   | 4.28   |   |
| 3464 | Papolg      | 1.27 | 66  | 5.05   | 108  | 6.39   |   |
| 3465 | Prdm5       | 1.27 | 60  | 1.22   | 85   | 1.55   |   |
| 3466 | RGD1563888  | 1.27 | 43  | 5.18   | 91   | 6.55   |   |
| 3467 | Zfp853      | 1.27 | 16  | 1.9    | 30   | 2.41   |   |
| 3468 | Zmpste24    | 1.27 | 92  | 12.86  | 147  | 16.27  |   |
| 3469 | Krba1       | 1.26 | 209 | 11.34  | 355  | 14.35  |   |
| 3470 | Cbx1        | 1.26 | 75  | 44.12  | 135  | 55.79  |   |
| 3471 | Zmym2       | 1.26 | 234 | 15.53  | 393  | 19.64  |   |
| 3472 | Ccdc50      | 1.26 | 112 | 16.99  | 213  | 21.48  |   |
| 3473 | Acbd3       | 1.26 | 239 | 18.21  | 411  | 23.02  |   |
| 3474 | Rab12       | 1.26 | 80  | 20.61  | 135  | 26.04  |   |
| 3475 | G2e3        | 1.26 | 57  | 3.07   | 88   | 3.88   |   |
| 3476 | Cdc37       | 1.26 | 307 | 25.4   | 508  | 32.1   |   |
| 3477 | Atp8a1      | 1.26 | 72  | 3.27   | 86   | 4.13   |   |
| 3478 | Naa16       | 1.26 | 68  | 2.86   | 104  | 3.62   |   |
| 3479 | Gss         | 1.26 | 47  | 5.58   | 75   | 7.05   |   |
| 3480 | Rps11       | 1.26 | 484 | 293.32 | 795  | 370.49 |   |
| 3481 | Cd63        | 1.26 | 392 | 125.64 | 662  | 158.65 |   |
| 3482 | Tbck        | 1.26 | 67  | 2.64   | 124  | 3.33   |   |
| 3483 | Golph3l     | 1.26 | 83  | 6.6    | 126  | 8.33   |   |
| 3484 | Kif1c       | 1.26 | 310 | 23.06  | 524  | 29.1   |   |
| 3485 | Ezh1        | 1.26 | 82  | 6.57   | 143  | 8.29   |   |
| 3486 | Hmg20a      | 1.26 | 227 | 16.92  | 373  | 21.35  |   |
| 3487 | Akr1c3      | 1.26 | 38  | 9.54   | 56   | 12.03  |   |
| 3488 | Cep295      | 1.26 | 89  | 2.26   | 133  | 2.86   |   |
| 3489 | Cyb5r1      | 1.26 | 20  | 3.16   | 32   | 3.99   |   |
| 3490 | Gtf2h5_1    | 1.26 | 32  | 7      | 53   | 8.83   |   |
| 3491 | MGC109340_1 | 1.26 | 27  | 15.27  | 49   | 19.26  |   |
| 3492 | Rassf4      | 1.26 | 125 | 16.81  | 234  | 21.21  |   |
| 3493 | RGD1308923  | 1.26 | 24  | 4.57   | 33   | 5.76   |   |
| 3494 | Glyr1       | 1.26 | 326 | 29.98  | 540  | 37.83  |   |
| 3495 | Dcp1a       | 1.26 | 206 | 8.22   | 330  | 10.37  |   |
| 3496 | Mlxip       | 1.26 | 119 | 7.93   | 228  | 10     |   |
| 3497 | Baz1a       | 1.26 | 96  | 5.55   | 166  | 7      |   |

Supplemental Table 3  
 FSH + Ad-E versus FSH + Ad-FOXO1(A3), 24 hours

|      | A         | B    | C    | D      | E    | F      | G |
|------|-----------|------|------|--------|------|--------|---|
| 3498 | Wbscr16   | 1.26 | 46   | 5.02   | 76   | 6.33   |   |
| 3499 | Smarcc2   | 1.26 | 378  | 29.33  | 610  | 36.95  |   |
| 3500 | Cd99      | 1.26 | 87   | 37.81  | 140  | 47.63  |   |
| 3501 | Irf2bpl   | 1.26 | 73   | 11.25  | 123  | 14.17  |   |
| 3502 | Plod2     | 1.26 | 4175 | 392.73 | 7169 | 494.65 |   |
| 3503 | Acvr2a    | 1.26 | 59   | 6.07   | 91   | 7.65   |   |
| 3504 | Spsb2_1   | 1.26 | 3    | 5.67   | 4    | 7.14   |   |
| 3505 | Tfpt      | 1.26 | 48   | 6      | 79   | 7.56   |   |
| 3506 | Tmem254   | 1.26 | 41   | 9.96   | 65   | 12.54  |   |
| 3507 | Akna      | 1.26 | 28   | 1.29   | 39   | 1.62   |   |
| 3508 | Ddx55     | 1.26 | 16   | 2.94   | 23   | 3.7    |   |
| 3509 | Eef2k     | 1.26 | 99   | 5.39   | 164  | 6.79   |   |
| 3510 | Hmbox1    | 1.26 | 232  | 10.61  | 304  | 13.36  |   |
| 3511 | Ptpmt1    | 1.26 | 27   | 4.22   | 37   | 5.32   |   |
| 3512 | Txndc16   | 1.26 | 29   | 2.8    | 57   | 3.52   |   |
| 3513 | Yars2     | 1.26 | 27   | 4.4    | 41   | 5.54   |   |
| 3514 | Nipbl     | 1.26 | 409  | 14.88  | 651  | 18.74  |   |
| 3515 | Cops2     | 1.26 | 206  | 18.05  | 342  | 22.72  |   |
| 3516 | Hprt1_2   | 1.26 | 43   | 34.64  | 67   | 43.6   |   |
| 3517 | Rusc2     | 1.26 | 225  | 16.63  | 370  | 20.93  |   |
| 3518 | Tjap1     | 1.26 | 145  | 12.27  | 240  | 15.44  |   |
| 3519 | Gabpa     | 1.26 | 91   | 6.37   | 155  | 8.02   |   |
| 3520 | Dars      | 1.26 | 157  | 17.5   | 230  | 22.01  |   |
| 3521 | Creb3     | 1.26 | 218  | 49.79  | 367  | 62.61  |   |
| 3522 | Vps35     | 1.26 | 326  | 34.6   | 541  | 43.5   |   |
| 3523 | Bptf      | 1.26 | 438  | 13.23  | 718  | 16.63  |   |
| 3524 | Hnrnpa2b1 | 1.26 | 429  | 170.33 | 686  | 214.01 |   |
| 3525 | Sltm      | 1.26 | 216  | 11.84  | 365  | 14.87  |   |
| 3526 | Rbm25l1   | 1.26 | 140  | 18.12  | 228  | 22.76  |   |
| 3527 | Gapvd1    | 1.26 | 323  | 18.57  | 552  | 23.32  |   |
| 3528 | Fras1     | 1.26 | 37   | 0.78   | 58   | 0.98   |   |
| 3529 | Sept5     | 1.26 | 26   | 2.44   | 50   | 3.07   |   |
| 3530 | Ubr5      | 1.26 | 664  | 30.53  | 1126 | 38.34  |   |
| 3531 | Rnf38     | 1.26 | 126  | 15.74  | 234  | 19.76  |   |
| 3532 | Mrrf      | 1.26 | 61   | 5.37   | 110  | 6.74   |   |
| 3533 | Ralgps2   | 1.26 | 72   | 7.79   | 115  | 9.79   |   |
| 3534 | Fam175b   | 1.25 | 93   | 9.58   | 156  | 12.02  |   |
| 3535 | Mocs1     | 1.25 | 80   | 6.42   | 93   | 8.06   |   |
| 3536 | Msl2      | 1.25 | 72   | 8.98   | 116  | 11.26  |   |
| 3537 | Nadsyn1   | 1.25 | 49   | 3.78   | 71   | 4.75   |   |
| 3538 | Sema5a    | 1.25 | 4382 | 138.85 | 7501 | 174.24 |   |
| 3539 | Pla2g7    | 1.25 | 382  | 69.82  | 684  | 87.61  |   |
| 3540 | Prr13     | 1.25 | 387  | 141.35 | 673  | 177.35 |   |
| 3541 | Arel1     | 1.25 | 204  | 11.68  | 337  | 14.65  |   |
| 3542 | Cep170b   | 1.25 | 186  | 9.36   | 318  | 11.74  |   |
| 3543 | Ugp2      | 1.25 | 73   | 10.03  | 133  | 12.59  |   |
| 3544 | Cdc123    | 1.25 | 145  | 24.97  | 253  | 31.32  |   |
| 3545 | Pcdhgb5   | 1.25 | 29   | 4.68   | 44   | 5.87   |   |
| 3546 | Tbc1d22b  | 1.25 | 71   | 7.73   | 125  | 9.69   |   |
| 3547 | Dmxl2     | 1.25 | 38   | 1.06   | 65   | 1.34   |   |
| 3548 | Pitpnb    | 1.25 | 190  | 27.4   | 334  | 34.35  |   |
| 3549 | Cdk5rap1  | 1.25 | 67   | 4.74   | 119  | 5.94   |   |
| 3550 | Slx1b     | 1.25 | 49   | 4.02   | 75   | 5.04   |   |
| 3551 | Cd200     | 1.25 | 242  | 34.02  | 401  | 42.63  |   |

Supplemental Table 3  
 FSH + Ad-E versus FSH + Ad-FOXO1(A3), 24 hours

|      | A              | B    | C    | D      | E    | F      | G |
|------|----------------|------|------|--------|------|--------|---|
| 3552 | Atrnl1         | 1.25 | 111  | 3.66   | 160  | 4.59   |   |
| 3553 | Pmpcb          | 1.25 | 237  | 49.09  | 394  | 61.51  |   |
| 3554 | Rmnd5a         | 1.25 | 98   | 19.77  | 171  | 24.78  |   |
| 3555 | Arl6ip6        | 1.25 | 68   | 7.83   | 107  | 9.8    |   |
| 3556 | Csrnp1         | 1.25 | 48   | 4.51   | 65   | 5.65   |   |
| 3557 | LOC100911779   | 1.25 | 35   | 9.44   | 53   | 11.83  |   |
| 3558 | Taf6l          | 1.25 | 55   | 6.65   | 76   | 8.32   |   |
| 3559 | Ncl            | 1.25 | 235  | 52.73  | 339  | 66.05  |   |
| 3560 | Dennd5a        | 1.25 | 484  | 33.94  | 839  | 42.52  |   |
| 3561 | Mcm10          | 1.25 | 47   | 3.09   | 79   | 3.86   |   |
| 3562 | Ubxn4          | 1.25 | 380  | 33.1   | 655  | 41.44  |   |
| 3563 | Fzd4           | 1.25 | 89   | 4.71   | 148  | 5.89   |   |
| 3564 | Hars2          | 1.25 | 67   | 4.9    | 85   | 6.14   |   |
| 3565 | RGD1309540     | 1.25 | 159  | 11.99  | 238  | 15     |   |
| 3566 | Gprasp2        | 1.25 | 106  | 13.32  | 178  | 16.66  |   |
| 3567 | Hsdl2          | 1.25 | 70   | 9.92   | 123  | 12.4   |   |
| 3568 | Gpx8           | 1.25 | 119  | 38.53  | 208  | 48.17  |   |
| 3569 | RGD1304694     | 1.25 | 126  | 13.42  | 214  | 16.78  |   |
| 3570 | Apmap          | 1.25 | 79   | 10.11  | 130  | 12.63  |   |
| 3571 | Sparc          | 1.25 | 1313 | 230.61 | 2216 | 288.14 |   |
| 3572 | Memo1          | 1.25 | 204  | 22.48  | 350  | 28.07  |   |
| 3573 | RGD1564420     | 1.25 | 198  | 15.83  | 334  | 19.77  |   |
| 3574 | Foxk2          | 1.25 | 272  | 15.12  | 410  | 18.88  |   |
| 3575 | Mapkap1        | 1.25 | 160  | 10.31  | 286  | 12.88  |   |
| 3576 | Rhot1          | 1.25 | 222  | 6.75   | 353  | 8.43   |   |
| 3577 | Purb           | 1.25 | 139  | 20.48  | 232  | 25.55  |   |
| 3578 | Lars           | 1.25 | 211  | 15.86  | 341  | 19.79  |   |
| 3579 | Son            | 1.25 | 1887 | 68.66  | 3165 | 85.62  |   |
| 3580 | AABR07044933.1 | 1.25 | 1    | 2.11   | 1    | 2.62   |   |
| 3581 | AABR07054264.1 | 1.25 | 3    | 5.66   | 5    | 7.05   |   |
| 3582 | AABR07055826.1 | 1.25 | 1    | 0.47   | 3    | 0.58   |   |
| 3583 | Ankra2         | 1.25 | 0    | 2.8    | 1    | 3.49   |   |
| 3584 | Apom           | 1.25 | 3    | 1.1    | 6    | 1.37   |   |
| 3585 | C2_2           | 1.25 | 1    | 0.83   | 2    | 1.04   |   |
| 3586 | Casc1          | 1.25 | 41   | 0.84   | 27   | 1.05   |   |
| 3587 | Chrn4          | 1.25 | 4    | 0.42   | 6    | 0.53   |   |
| 3588 | Clec2j         | 1.25 | 4    | 2.06   | 15   | 2.56   |   |
| 3589 | Csnk1g3        | 1.25 | 70   | 10.48  | 125  | 13.06  |   |
| 3590 | Ddx18          | 1.25 | 78   | 12.14  | 128  | 15.12  |   |
| 3591 | Ebf2           | 1.25 | 9    | 0.4    | 20   | 0.5    |   |
| 3592 | Emc2           | 1.25 | 33   | 4.88   | 40   | 6.08   |   |
| 3593 | Erb3           | 1.25 | 2    | 0.18   | 5    | 0.23   |   |
| 3594 | Gprc5a         | 1.25 | 3    | 0.52   | 7    | 0.65   |   |
| 3595 | Guf1           | 1.25 | 35   | 1.58   | 61   | 1.97   |   |
| 3596 | Hmgn1          | 1.25 | 145  | 65.3   | 214  | 81.37  |   |
| 3597 | Ifit1lb        | 1.25 | 12   | 0.48   | 12   | 0.6    |   |
| 3598 | Igf2bp2        | 1.25 | 5    | 0.3    | 11   | 0.38   |   |
| 3599 | Kif14          | 1.25 | 18   | 0.65   | 24   | 0.81   |   |
| 3600 | Lcmt2          | 1.25 | 20   | 3.58   | 35   | 4.46   |   |
| 3601 | LOC689959      | 1.25 | 4    | 0.81   | 9    | 1      |   |
| 3602 | LOC691931      | 1.25 | 5    | 1.52   | 11   | 1.89   |   |
| 3603 | Mcm9           | 1.25 | 92   | 2.67   | 142  | 3.33   |   |
| 3604 | Mob2           | 1.25 | 56   | 10.04  | 96   | 12.51  |   |
| 3605 | Mon1a          | 1.25 | 41   | 4.18   | 95   | 5.21   |   |

Supplemental Table 3  
 FSH + Ad-E versus FSH + Ad-FOXO1(A3), 24 hours

|      | A              | B    | C   | D     | E   | F     | G |
|------|----------------|------|-----|-------|-----|-------|---|
| 3606 | Morn1          | 1.25 | 70  | 1.05  | 78  | 1.31  |   |
| 3607 | Ntng1          | 1.25 | 23  | 0.81  | 33  | 1.01  |   |
| 3608 | Nxph3          | 1.25 | 3   | 0.58  | 6   | 0.73  |   |
| 3609 | Pcdhb12        | 1.25 | 7   | 1.08  | 14  | 1.34  |   |
| 3610 | Pdzd8          | 1.25 | 149 | 6.35  | 245 | 7.91  |   |
| 3611 | Pkmyt1         | 1.25 | 11  | 1.88  | 23  | 2.34  |   |
| 3612 | Ppargc1b       | 1.25 | 7   | 0.33  | 17  | 0.41  |   |
| 3613 | RGD1559972     | 1.25 | 0   | 2.51  | 1   | 3.13  |   |
| 3614 | RGD1561161     | 1.25 | 140 | 4.89  | 240 | 6.09  |   |
| 3615 | Rn60_17_0530.1 | 1.25 | 28  | 16.04 | 50  | 19.98 |   |
| 3616 | Rn60_4_1361.1  | 1.25 | 0   | 0.51  | 0   | 0.63  |   |
| 3617 | Rn60_X_0635.3  | 1.25 | 3   | 1.07  | 5   | 1.34  |   |
| 3618 | Sdr42e1        | 1.25 | 6   | 0.42  | 10  | 0.52  |   |
| 3619 | Snupn          | 1.25 | 93  | 4.07  | 144 | 5.08  |   |
| 3620 | Strada         | 1.25 | 203 | 20.32 | 332 | 25.32 |   |
| 3621 | Thoc6          | 1.25 | 28  | 8.99  | 42  | 11.2  |   |
| 3622 | Tom1l1         | 1.25 | 38  | 3.33  | 42  | 4.15  |   |
| 3623 | Trmt11         | 1.25 | 25  | 2.08  | 41  | 2.59  |   |
| 3624 | Tsen2          | 1.25 | 52  | 2.05  | 70  | 2.55  |   |
| 3625 | Tsga10         | 1.25 | 18  | 0.4   | 27  | 0.5   |   |
| 3626 | Usp16          | 1.25 | 85  | 7.91  | 146 | 9.85  |   |
| 3627 | Usp29          | 1.25 | 12  | 0.52  | 23  | 0.64  |   |
| 3628 | Wnk2           | 1.25 | 20  | 0.16  | 14  | 0.2   |   |
| 3629 | Xkr4           | 1.25 | 55  | 1.12  | 87  | 1.39  |   |
| 3630 | Zfp867         | 1.25 | 9   | 2.37  | 15  | 2.95  |   |
| 3631 | Zkscan2        | 1.25 | 7   | 0.33  | 13  | 0.41  |   |
| 3632 | AABR07006333.1 | 1.25 | 3   | 1.73  | 5   | 2.16  |   |
| 3633 | AABR07030529.1 | 1.25 | 3   | 7.49  | 5   | 9.33  |   |
| 3634 | AABR07038021.1 | 1.25 | 4   | 0.7   | 8   | 0.87  |   |
| 3635 | AABR07043098.1 | 1.25 | 4   | 1.37  | 6   | 1.7   |   |
| 3636 | AABR07050391.2 | 1.25 | 0   | 9.01  | 0   | 11.22 |   |
| 3637 | Acvr2b         | 1.25 | 25  | 3.03  | 42  | 3.78  |   |
| 3638 | Arl3           | 1.25 | 100 | 12.81 | 158 | 15.96 |   |
| 3639 | Ccdc17         | 1.25 | 14  | 1.48  | 21  | 1.85  |   |
| 3640 | Ccdc64         | 1.25 | 8   | 0.32  | 12  | 0.4   |   |
| 3641 | Cystm1         | 1.25 | 43  | 23.33 | 79  | 29.07 |   |
| 3642 | Fam118b        | 1.25 | 62  | 5.94  | 117 | 7.4   |   |
| 3643 | Fibin          | 1.25 | 30  | 4.78  | 50  | 5.96  |   |
| 3644 | Ldb3           | 1.25 | 10  | 0.36  | 32  | 0.45  |   |
| 3645 | LOC100910771   | 1.25 | 0   | 1.56  | 0   | 1.94  |   |
| 3646 | Lsm11          | 1.25 | 13  | 2.85  | 28  | 3.55  |   |
| 3647 | Mafb           | 1.25 | 17  | 3.41  | 30  | 4.25  |   |
| 3648 | Mlkl           | 1.25 | 19  | 1.72  | 32  | 2.14  |   |
| 3649 | Pcdhb13        | 1.25 | 3   | 0.45  | 5   | 0.57  |   |
| 3650 | Plxna4a        | 1.25 | 18  | 0.38  | 23  | 0.48  |   |
| 3651 | Prr16          | 1.25 | 3   | 0.39  | 5   | 0.49  |   |
| 3652 | Rpl32_2        | 1.25 | 0   | 4.83  | 0   | 6.02  |   |
| 3653 | Sass6_1        | 1.25 | 4   | 1.67  | 6   | 2.08  |   |
| 3654 | Sdsl           | 1.25 | 9   | 1.58  | 15  | 1.96  |   |
| 3655 | SNORD113_21    | 1.25 | 0   | 11.43 | 0   | 14.25 |   |
| 3656 | SNORD36_3      | 1.25 | 0   | 30.6  | 0   | 38.13 |   |
| 3657 | Snx32          | 1.25 | 8   | 1.79  | 17  | 2.23  |   |
| 3658 | Taf9b          | 1.25 | 18  | 1.64  | 31  | 2.04  |   |
| 3659 | Tap2_1         | 1.25 | 0   | 2.69  | 1   | 3.35  |   |

Supplemental Table 3  
 FSH + Ad-E versus FSH + Ad-FOXO1(A3), 24 hours

|      | A              | B    | C    | D      | E    | F      | G |
|------|----------------|------|------|--------|------|--------|---|
| 3660 | Tnfsf12        | 1.25 | 9    | 2.12   | 20   | 2.64   |   |
| 3661 | Trim69         | 1.25 | 3    | 0.22   | 6    | 0.27   |   |
| 3662 | Triqk          | 1.25 | 13   | 2.84   | 25   | 3.54   |   |
| 3663 | Ubn2           | 1.25 | 261  | 12.14  | 397  | 15.12  |   |
| 3664 | Zfp961         | 1.25 | 10   | 2.57   | 19   | 3.2    |   |
| 3665 | Znrf1          | 1.25 | 53   | 7.53   | 111  | 9.38   |   |
| 3666 | Ctnna1         | 1.25 | 615  | 62.24  | 986  | 77.53  |   |
| 3667 | Tmem127        | 1.25 | 270  | 23.61  | 427  | 29.39  |   |
| 3668 | Ifnar1         | 1.25 | 301  | 24.1   | 495  | 30     |   |
| 3669 | Mapre1         | 1.24 | 236  | 34.97  | 398  | 43.54  |   |
| 3670 | Strip1         | 1.24 | 195  | 16.69  | 314  | 20.77  |   |
| 3671 | Ddx1           | 1.24 | 278  | 38.35  | 476  | 47.71  |   |
| 3672 | Zc3h7a         | 1.24 | 195  | 11.17  | 330  | 13.9   |   |
| 3673 | Rtn3           | 1.24 | 521  | 35.58  | 862  | 44.26  |   |
| 3674 | Rimklb         | 1.24 | 59   | 32.86  | 100  | 40.87  |   |
| 3675 | Eml4           | 1.24 | 139  | 7.68   | 224  | 9.56   |   |
| 3676 | Optn           | 1.24 | 282  | 15.67  | 480  | 19.48  |   |
| 3677 | Cct8           | 1.24 | 317  | 42.66  | 534  | 53.04  |   |
| 3678 | LOC100911766   | 1.24 | 11   | 9.9    | 22   | 12.31  |   |
| 3679 | Fnbp1l         | 1.24 | 142  | 10.18  | 251  | 12.65  |   |
| 3680 | Nfat5          | 1.24 | 415  | 9.98   | 685  | 12.41  |   |
| 3681 | Tcp1           | 1.24 | 253  | 45.6   | 418  | 56.7   |   |
| 3682 | Tiam2          | 1.24 | 122  | 5.34   | 215  | 6.63   |   |
| 3683 | Ubn1           | 1.24 | 295  | 14.13  | 494  | 17.57  |   |
| 3684 | Adss           | 1.24 | 100  | 11.84  | 154  | 14.71  |   |
| 3685 | Tcf4           | 1.24 | 413  | 20.71  | 807  | 25.74  |   |
| 3686 | Leng8          | 1.24 | 386  | 24.23  | 633  | 30.11  |   |
| 3687 | Synrg          | 1.24 | 159  | 13.76  | 296  | 17.11  |   |
| 3688 | Golph3         | 1.24 | 159  | 21.4   | 278  | 26.59  |   |
| 3689 | Nek9           | 1.24 | 298  | 33.89  | 500  | 42.1   |   |
| 3690 | Kmt2a          | 1.24 | 313  | 9.36   | 524  | 11.62  |   |
| 3691 | Exoc5          | 1.24 | 139  | 9.37   | 237  | 11.63  |   |
| 3692 | Golga1         | 1.24 | 93   | 4.52   | 161  | 5.61   |   |
| 3693 | Npm1           | 1.24 | 183  | 61.21  | 280  | 75.99  |   |
| 3694 | Fgd1           | 1.24 | 32   | 5.56   | 45   | 6.9    |   |
| 3695 | Tpcn1          | 1.24 | 108  | 8.43   | 166  | 10.46  |   |
| 3696 | Gucy1a3        | 1.24 | 556  | 34.34  | 925  | 42.61  |   |
| 3697 | Dnajb2         | 1.24 | 159  | 18.12  | 241  | 22.49  |   |
| 3698 | Ddah1          | 1.24 | 1261 | 111.67 | 2233 | 138.42 |   |
| 3699 | Lrrc45         | 1.24 | 47   | 3.57   | 76   | 4.43   |   |
| 3700 | Myo6           | 1.24 | 283  | 11.91  | 483  | 14.75  |   |
| 3701 | Ash1l          | 1.24 | 583  | 13.59  | 990  | 16.84  |   |
| 3702 | Cspp1          | 1.24 | 158  | 6.25   | 273  | 7.74   |   |
| 3703 | Cep131         | 1.24 | 46   | 3.43   | 78   | 4.25   |   |
| 3704 | Pola2          | 1.24 | 40   | 4.81   | 66   | 5.96   |   |
| 3705 | Scaper         | 1.24 | 247  | 4.6    | 282  | 5.7    |   |
| 3706 | AABR07051787.1 | 1.24 | 26   | 3.69   | 40   | 4.57   |   |
| 3707 | Tp53bp2        | 1.24 | 109  | 7.94   | 182  | 9.83   |   |
| 3708 | Foxo1          | 1.24 | 3231 | 346.79 | 5698 | 429.3  |   |
| 3709 | Slc8a1         | 1.24 | 124  | 7.31   | 235  | 9.05   |   |
| 3710 | Brca1          | 1.24 | 42   | 1.58   | 70   | 1.95   |   |
| 3711 | Fam179b        | 1.24 | 203  | 7.97   | 308  | 9.87   |   |
| 3712 | Pea15          | 1.24 | 43   | 9.11   | 59   | 11.28  |   |
| 3713 | Rbak           | 1.24 | 37   | 2.97   | 58   | 3.67   |   |

Supplemental Table 3  
 FSH + Ad-E versus FSH + Ad-FOXO1(A3), 24 hours

|      | A              | B    | C   | D     | E    | F      | G |
|------|----------------|------|-----|-------|------|--------|---|
| 3714 | Supt6h         | 1.24 | 680 | 34.82 | 1139 | 43.09  |   |
| 3715 | Usp25          | 1.24 | 151 | 10.81 | 244  | 13.38  |   |
| 3716 | Ppig           | 1.24 | 139 | 9.69  | 237  | 11.99  |   |
| 3717 | Dnajc14        | 1.24 | 161 | 17.14 | 268  | 21.21  |   |
| 3718 | Kansl1         | 1.24 | 274 | 22.29 | 463  | 27.58  |   |
| 3719 | Fzd6           | 1.24 | 162 | 11.72 | 272  | 14.49  |   |
| 3720 | Stat1          | 1.24 | 232 | 10.04 | 403  | 12.41  |   |
| 3721 | Map9           | 1.24 | 55  | 3.03  | 89   | 3.75   |   |
| 3722 | Ccdc88c        | 1.24 | 46  | 1.04  | 66   | 1.28   |   |
| 3723 | Galc           | 1.24 | 23  | 3.84  | 33   | 4.75   |   |
| 3724 | Mier3          | 1.24 | 121 | 7.76  | 194  | 9.59   |   |
| 3725 | Rbm18          | 1.24 | 112 | 13.91 | 187  | 17.19  |   |
| 3726 | Mta3           | 1.24 | 312 | 26.26 | 525  | 32.43  |   |
| 3727 | Ptpn3          | 1.24 | 43  | 1.1   | 77   | 1.35   |   |
| 3728 | Vps37c         | 1.24 | 67  | 5.88  | 106  | 7.26   |   |
| 3729 | Nmd3           | 1.24 | 65  | 8.99  | 104  | 11.11  |   |
| 3730 | Socs6          | 1.24 | 56  | 5.66  | 115  | 6.99   |   |
| 3731 | R3hdm1         | 1.24 | 973 | 49.91 | 1565 | 61.65  |   |
| 3732 | Cap1           | 1.23 | 845 | 118.8 | 1400 | 146.66 |   |
| 3733 | Bre            | 1.23 | 131 | 10.16 | 196  | 12.55  |   |
| 3734 | Hs6st1         | 1.23 | 736 | 56.49 | 1273 | 69.72  |   |
| 3735 | Rab6a          | 1.23 | 338 | 30.72 | 554  | 37.91  |   |
| 3736 | Wwtr1          | 1.23 | 231 | 35.83 | 479  | 44.21  |   |
| 3737 | Clcc1          | 1.23 | 72  | 6.11  | 121  | 7.54   |   |
| 3738 | Ppp1r13l       | 1.23 | 21  | 2.92  | 35   | 3.6    |   |
| 3739 | Tamm41         | 1.23 | 48  | 6.09  | 92   | 7.51   |   |
| 3740 | Tsc22d4_2      | 1.23 | 0   | 6.08  | 0    | 7.5    |   |
| 3741 | Zbtb49         | 1.23 | 45  | 2.6   | 61   | 3.2    |   |
| 3742 | Ctnn_1         | 1.23 | 0   | 19.05 | 0    | 23.5   |   |
| 3743 | Iars           | 1.23 | 101 | 7.58  | 169  | 9.35   |   |
| 3744 | Rfx3           | 1.23 | 68  | 2.01  | 112  | 2.48   |   |
| 3745 | Nf1            | 1.23 | 377 | 9.74  | 604  | 12.02  |   |
| 3746 | Akap8l         | 1.23 | 106 | 9.88  | 188  | 12.18  |   |
| 3747 | Mob1a          | 1.23 | 258 | 21.78 | 413  | 26.85  |   |
| 3748 | Dtnbp1         | 1.23 | 123 | 12.65 | 168  | 15.59  |   |
| 3749 | Etv6           | 1.23 | 343 | 20.99 | 631  | 25.87  |   |
| 3750 | Sept8          | 1.23 | 165 | 10.06 | 277  | 12.4   |   |
| 3751 | Xrn2           | 1.23 | 281 | 25.12 | 485  | 30.96  |   |
| 3752 | Ice1           | 1.23 | 287 | 13.73 | 494  | 16.91  |   |
| 3753 | AABR07058985.1 | 1.23 | 19  | 6.03  | 30   | 7.43   |   |
| 3754 | Myo5a          | 1.23 | 82  | 4.21  | 126  | 5.19   |   |
| 3755 | Renbp          | 1.23 | 24  | 4.76  | 37   | 5.86   |   |
| 3756 | Gadd45g        | 1.23 | 17  | 5.65  | 29   | 6.95   |   |
| 3757 | Kcnab1         | 1.23 | 208 | 5.29  | 266  | 6.52   |   |
| 3758 | Vamp1          | 1.23 | 18  | 2.34  | 33   | 2.88   |   |
| 3759 | Zfp868         | 1.23 | 48  | 9.68  | 82   | 11.92  |   |
| 3760 | Mtmr3          | 1.23 | 428 | 19.53 | 713  | 24.05  |   |
| 3761 | Pprc1          | 1.23 | 206 | 13.35 | 342  | 16.43  |   |
| 3762 | Ubp1           | 1.23 | 201 | 19.16 | 315  | 23.58  |   |
| 3763 | Myef2          | 1.23 | 208 | 16.65 | 290  | 20.48  |   |
| 3764 | Rad21          | 1.23 | 510 | 51.42 | 840  | 63.26  |   |
| 3765 | LOC100910143   | 1.23 | 0   | 2.13  | 0    | 2.63   |   |
| 3766 | Mrto4          | 1.23 | 35  | 8.28  | 62   | 10.19  |   |
| 3767 | Otulin         | 1.23 | 9   | 7.77  | 20   | 9.55   |   |

Supplemental Table 3  
 FSH + Ad-E versus FSH + Ad-FOXO1(A3), 24 hours

|      | A        | B    | C    | D      | E    | F      | G |
|------|----------|------|------|--------|------|--------|---|
| 3768 | Zcchc6   | 1.23 | 171  | 8.57   | 294  | 10.54  |   |
| 3769 | Fam208a  | 1.23 | 166  | 7.98   | 264  | 9.81   |   |
| 3770 | Prkcdbp  | 1.23 | 76   | 21.46  | 126  | 26.39  |   |
| 3771 | Zfp263   | 1.23 | 53   | 6.68   | 88   | 8.21   |   |
| 3772 | Eif5b    | 1.23 | 56   | 14.91  | 88   | 18.33  |   |
| 3773 | Rsrc2    | 1.23 | 121  | 14.88  | 223  | 18.28  |   |
| 3774 | Socs5    | 1.23 | 103  | 7.44   | 157  | 9.14   |   |
| 3775 | Pdcd6ip  | 1.23 | 398  | 23.27  | 669  | 28.59  |   |
| 3776 | Psmc7    | 1.23 | 164  | 32.6   | 267  | 40.06  |   |
| 3777 | Pcmdt2   | 1.23 | 201  | 14.6   | 355  | 17.93  |   |
| 3778 | Mpg      | 1.23 | 31   | 4.18   | 30   | 5.13   |   |
| 3779 | Slc38a9  | 1.23 | 70   | 2.26   | 108  | 2.78   |   |
| 3780 | Tprg1l   | 1.23 | 198  | 39.12  | 327  | 48.05  |   |
| 3781 | Cops7b   | 1.23 | 53   | 8.12   | 84   | 9.97   |   |
| 3782 | Fastkd1  | 1.23 | 36   | 2.85   | 69   | 3.5    |   |
| 3783 | Terf1    | 1.23 | 63   | 2.51   | 96   | 3.08   |   |
| 3784 | Ubt1     | 1.23 | 26   | 2.73   | 31   | 3.36   |   |
| 3785 | Zbtb26   | 1.23 | 47   | 4.57   | 68   | 5.61   |   |
| 3786 | Fmnl1    | 1.23 | 13   | 1.31   | 26   | 1.61   |   |
| 3787 | Hepacam  | 1.23 | 18   | 4.04   | 34   | 4.96   |   |
| 3788 | Ptpre    | 1.23 | 483  | 40.47  | 857  | 49.69  |   |
| 3789 | Kpnb1    | 1.23 | 756  | 47.45  | 1240 | 58.25  |   |
| 3790 | Clasrp   | 1.23 | 147  | 12.54  | 235  | 15.39  |   |
| 3791 | Hax1     | 1.23 | 54   | 17.2   | 92   | 21.1   |   |
| 3792 | Lin7c    | 1.23 | 53   | 23.52  | 91   | 28.86  |   |
| 3793 | Rcn2     | 1.23 | 336  | 56.12  | 561  | 68.85  |   |
| 3794 | Sh3bp5l  | 1.23 | 111  | 12.68  | 180  | 15.56  |   |
| 3795 | Stk25    | 1.23 | 231  | 37.24  | 374  | 45.68  |   |
| 3796 | Herc2    | 1.23 | 465  | 9.6    | 738  | 11.77  |   |
| 3797 | Dpysl2   | 1.23 | 1070 | 148.14 | 1819 | 181.69 |   |
| 3798 | Kdm6a    | 1.23 | 380  | 20.26  | 655  | 24.85  |   |
| 3799 | Fdps     | 1.23 | 797  | 83.93  | 1286 | 102.94 |   |
| 3800 | Gabpb1   | 1.23 | 183  | 16.54  | 318  | 20.28  |   |
| 3801 | Fryl     | 1.23 | 471  | 12.99  | 766  | 15.93  |   |
| 3802 | Lancl1   | 1.23 | 164  | 10.37  | 263  | 12.72  |   |
| 3803 | Alg1     | 1.23 | 30   | 4.98   | 50   | 6.11   |   |
| 3804 | Ccdc112  | 1.23 | 39   | 4.08   | 57   | 5      |   |
| 3805 | Dr1_1    | 1.23 | 2    | 9.03   | 2    | 11.07  |   |
| 3806 | Thg1l    | 1.23 | 33   | 3.89   | 49   | 4.77   |   |
| 3807 | Usp38    | 1.23 | 93   | 6.18   | 143  | 7.57   |   |
| 3808 | Ankrd13c | 1.23 | 197  | 18.5   | 325  | 22.68  |   |
| 3809 | MGC94335 | 1.23 | 39   | 9.46   | 75   | 11.59  |   |
| 3810 | Mios     | 1.23 | 38   | 2.95   | 64   | 3.61   |   |
| 3811 | Taf4a    | 1.23 | 76   | 6.83   | 104  | 8.37   |   |
| 3812 | Fkbp9    | 1.23 | 472  | 54.72  | 772  | 67.04  |   |
| 3813 | Evc      | 1.22 | 72   | 4.87   | 113  | 5.96   |   |
| 3814 | Nod1     | 1.22 | 65   | 5.08   | 113  | 6.22   |   |
| 3815 | Pld2     | 1.22 | 76   | 7.51   | 136  | 9.2    |   |
| 3816 | Lrig1    | 1.22 | 93   | 8.57   | 157  | 10.49  |   |
| 3817 | Cyb5r3   | 1.22 | 185  | 34.13  | 304  | 41.77  |   |
| 3818 | Rgs12    | 1.22 | 129  | 5.44   | 216  | 6.66   |   |
| 3819 | Cat      | 1.22 | 248  | 32.23  | 407  | 39.45  |   |
| 3820 | Cep290   | 1.22 | 35   | 0.88   | 44   | 1.07   |   |
| 3821 | Dtwd2    | 1.22 | 21   | 2.21   | 33   | 2.7    |   |

Supplemental Table 3  
 FSH + Ad-E versus FSH + Ad-FOXO1(A3), 24 hours

|      | A            | B    | C    | D      | E    | F     | G |
|------|--------------|------|------|--------|------|-------|---|
| 3822 | Hemk1        | 1.22 | 18   | 2.27   | 22   | 2.77  |   |
| 3823 | Oscp1        | 1.22 | 334  | 2.54   | 183  | 3.11  |   |
| 3824 | Veph1        | 1.22 | 51   | 1.13   | 77   | 1.38  |   |
| 3825 | Ccnc         | 1.22 | 61   | 4.74   | 101  | 5.8   |   |
| 3826 | Gnl2         | 1.22 | 107  | 7.72   | 177  | 9.45  |   |
| 3827 | Rab11fip1    | 1.22 | 216  | 9.64   | 363  | 11.8  |   |
| 3828 | Rbbp5        | 1.22 | 83   | 6.2    | 148  | 7.59  |   |
| 3829 | Rpp40        | 1.22 | 17   | 2.9    | 23   | 3.55  |   |
| 3830 | Scaf4        | 1.22 | 194  | 8.06   | 285  | 9.86  |   |
| 3831 | Sgk3         | 1.22 | 29   | 2.67   | 47   | 3.27  |   |
| 3832 | Hnrnp1       | 1.22 | 590  | 50.62  | 971  | 61.92 |   |
| 3833 | Axl          | 1.22 | 390  | 29.82  | 646  | 36.47 |   |
| 3834 | N4bp1        | 1.22 | 175  | 9.94   | 289  | 12.15 |   |
| 3835 | Flywch1      | 1.22 | 146  | 10.51  | 226  | 12.85 |   |
| 3836 | Rbms2        | 1.22 | 131  | 22.9   | 245  | 28    |   |
| 3837 | Ubap2l       | 1.22 | 648  | 45.17  | 1068 | 55.22 |   |
| 3838 | Brox         | 1.22 | 172  | 16.04  | 282  | 19.61 |   |
| 3839 | Sike1        | 1.22 | 66   | 9.6    | 113  | 11.74 |   |
| 3840 | Taf15        | 1.22 | 316  | 21.48  | 461  | 26.25 |   |
| 3841 | Cdk5rap2     | 1.22 | 205  | 9.31   | 296  | 11.38 |   |
| 3842 | Fbxl5        | 1.22 | 137  | 11.97  | 242  | 14.62 |   |
| 3843 | Mtx1         | 1.22 | 154  | 13.86  | 219  | 16.94 |   |
| 3844 | Ppp1r11      | 1.22 | 94   | 17.53  | 159  | 21.42 |   |
| 3845 | Mapkapk5     | 1.22 | 109  | 16.83  | 176  | 20.56 |   |
| 3846 | Ahctf1       | 1.22 | 228  | 8.35   | 364  | 10.2  |   |
| 3847 | Atp10a       | 1.22 | 46   | 2.13   | 70   | 2.6   |   |
| 3848 | Ppp2r2a      | 1.22 | 373  | 37.01  | 657  | 45.19 |   |
| 3849 | Cdr2         | 1.22 | 33   | 4.62   | 60   | 5.65  |   |
| 3850 | Diaph1       | 1.22 | 413  | 21.71  | 647  | 26.5  |   |
| 3851 | Noc3l        | 1.22 | 56   | 6.04   | 104  | 7.38  |   |
| 3852 | Xbp1         | 1.22 | 285  | 79.49  | 476  | 97.02 |   |
| 3853 | LOC100233176 | 1.22 | 59   | 9.46   | 75   | 11.55 |   |
| 3854 | Anapc7       | 1.22 | 119  | 12.82  | 197  | 15.64 |   |
| 3855 | Akirin2      | 1.22 | 116  | 21.1   | 185  | 25.75 |   |
| 3856 | Clock        | 1.22 | 139  | 4.81   | 231  | 5.86  |   |
| 3857 | Btbd7        | 1.22 | 234  | 16.77  | 395  | 20.46 |   |
| 3858 | Ing3         | 1.22 | 46   | 6.38   | 72   | 7.78  |   |
| 3859 | Gtpbp2       | 1.22 | 98   | 7.61   | 148  | 9.28  |   |
| 3860 | Phip         | 1.22 | 206  | 11.73  | 351  | 14.31 |   |
| 3861 | Ppp1r15a     | 1.22 | 104  | 15.41  | 168  | 18.79 |   |
| 3862 | Cmpk1        | 1.22 | 109  | 17     | 161  | 20.72 |   |
| 3863 | Ksr1         | 1.22 | 88   | 3.99   | 124  | 4.87  |   |
| 3864 | Gnrhr        | 1.22 | 1159 | 137.62 | 1945 | 167.7 |   |
| 3865 | Cnbd2        | 1.22 | 503  | 3.12   | 657  | 3.81  |   |
| 3866 | Plekho1      | 1.22 | 68   | 13.66  | 113  | 16.65 |   |
| 3867 | Micu2        | 1.22 | 289  | 17.88  | 492  | 21.78 |   |
| 3868 | Rab11fip5    | 1.22 | 155  | 11.46  | 261  | 13.96 |   |
| 3869 | Cmtm3        | 1.22 | 113  | 23.63  | 183  | 28.77 |   |
| 3870 | Zfp189       | 1.22 | 36   | 4.27   | 57   | 5.2   |   |
| 3871 | Cul4b        | 1.22 | 155  | 14.02  | 266  | 17.07 |   |
| 3872 | Pdcl         | 1.22 | 76   | 14.29  | 123  | 17.39 |   |
| 3873 | Thoc7        | 1.22 | 140  | 21.33  | 226  | 25.96 |   |
| 3874 | Sel1l        | 1.22 | 466  | 25.22  | 765  | 30.7  |   |
| 3875 | Fcho2        | 1.22 | 157  | 7.75   | 281  | 9.43  |   |



Supplemental Table 3  
 FSH + Ad-E versus FSH + Ad-FOXO1(A3), 24 hours

|      | A            | B    | C   | D     | E   | F      | G |
|------|--------------|------|-----|-------|-----|--------|---|
| 3876 | Pbrm1        | 1.22 | 343 | 17.62 | 553 | 21.43  |   |
| 3877 | Heatr5a      | 1.22 | 284 | 11.08 | 477 | 13.48  |   |
| 3878 | Morf4l1      | 1.22 | 150 | 93.87 | 208 | 114.18 |   |
| 3879 | Mdn1         | 1.22 | 248 | 4.14  | 391 | 5.03   |   |
| 3880 | Ankrd46      | 1.22 | 155 | 24.26 | 253 | 29.5   |   |
| 3881 | Tceb1        | 1.22 | 59  | 11.82 | 97  | 14.38  |   |
| 3882 | Fam168b      | 1.22 | 551 | 45.6  | 888 | 55.43  |   |
| 3883 | Atxn7        | 1.21 | 78  | 5.17  | 123 | 6.29   |   |
| 3884 | Cwc25        | 1.21 | 57  | 5.43  | 100 | 6.6    |   |
| 3885 | Fam213a      | 1.21 | 21  | 3.68  | 37  | 4.47   |   |
| 3886 | Limch1       | 1.21 | 51  | 2.22  | 79  | 2.69   |   |
| 3887 | LOC100910121 | 1.21 | 240 | 21.61 | 388 | 26.25  |   |
| 3888 | Npr2         | 1.21 | 318 | 27.51 | 531 | 33.42  |   |
| 3889 | Nthl1        | 1.21 | 13  | 2.45  | 15  | 2.98   |   |
| 3890 | Prmt10       | 1.21 | 126 | 10.49 | 175 | 12.74  |   |
| 3891 | RGD1564171   | 1.21 | 17  | 4.55  | 23  | 5.53   |   |
| 3892 | Rpusd3       | 1.21 | 24  | 4.12  | 37  | 5      |   |
| 3893 | Scfd2        | 1.21 | 37  | 2.48  | 76  | 3.01   |   |
| 3894 | Sh3bp2       | 1.21 | 18  | 2.03  | 30  | 2.46   |   |
| 3895 | Tarsl2       | 1.21 | 14  | 1.51  | 21  | 1.84   |   |
| 3896 | Fam206a      | 1.21 | 9   | 2.98  | 16  | 3.62   |   |
| 3897 | Jazf1        | 1.21 | 55  | 3.97  | 76  | 4.83   |   |
| 3898 | Ppp2r2d      | 1.21 | 99  | 11.86 | 150 | 14.41  |   |
| 3899 | Sh2b2        | 1.21 | 11  | 1.03  | 21  | 1.25   |   |
| 3900 | Slc3a1       | 1.21 | 45  | 1.23  | 33  | 1.5    |   |
| 3901 | Tspan18      | 1.21 | 16  | 0.78  | 27  | 0.95   |   |
| 3902 | Capza1       | 1.21 | 251 | 26.5  | 425 | 32.19  |   |
| 3903 | Carm1        | 1.21 | 188 | 18.62 | 292 | 22.61  |   |
| 3904 | Arpc2        | 1.21 | 431 | 54.44 | 734 | 66.09  |   |
| 3905 | Uso1         | 1.21 | 271 | 22.03 | 461 | 26.75  |   |
| 3906 | Dnajb6       | 1.21 | 143 | 12.57 | 264 | 15.25  |   |
| 3907 | Mms19        | 1.21 | 113 | 8.03  | 160 | 9.75   |   |
| 3908 | Ppp1r15b     | 1.21 | 282 | 19.1  | 470 | 23.18  |   |
| 3909 | Rims2        | 1.21 | 148 | 2.97  | 242 | 3.61   |   |
| 3910 | Dbnl         | 1.21 | 150 | 20.51 | 232 | 24.89  |   |
| 3911 | Anapc4       | 1.21 | 187 | 15.44 | 324 | 18.74  |   |
| 3912 | N4bp2l2      | 1.21 | 126 | 19.35 | 193 | 23.48  |   |
| 3913 | Scpep1       | 1.21 | 222 | 33.76 | 352 | 40.95  |   |
| 3914 | Aggf1        | 1.21 | 69  | 7.57  | 114 | 9.18   |   |
| 3915 | Kat6b        | 1.21 | 222 | 7.76  | 353 | 9.41   |   |
| 3916 | Slc4a7       | 1.21 | 169 | 10.35 | 282 | 12.55  |   |
| 3917 | Dmxl1        | 1.21 | 198 | 5.92  | 320 | 7.18   |   |
| 3918 | Lsm14a       | 1.21 | 249 | 23.14 | 402 | 28.05  |   |
| 3919 | Pdk3         | 1.21 | 50  | 5.96  | 72  | 7.23   |   |
| 3920 | Telo2        | 1.21 | 113 | 9.1   | 164 | 11.03  |   |
| 3921 | Satb1        | 1.21 | 193 | 12.61 | 315 | 15.29  |   |
| 3922 | Dnttip2      | 1.21 | 102 | 13.58 | 161 | 16.46  |   |
| 3923 | Rab18        | 1.21 | 169 | 39.54 | 269 | 47.92  |   |
| 3924 | lpo7         | 1.21 | 226 | 14.67 | 371 | 17.78  |   |
| 3925 | Fkbp2        | 1.21 | 27  | 16.59 | 59  | 20.1   |   |
| 3926 | Rgp1         | 1.21 | 150 | 8.73  | 192 | 10.58  |   |
| 3927 | Wipi1        | 1.21 | 148 | 20.41 | 216 | 24.72  |   |
| 3928 | Rars         | 1.21 | 145 | 21.94 | 226 | 26.57  |   |
| 3929 | Kat6a        | 1.21 | 376 | 14.6  | 615 | 17.67  |   |

Supplemental Table 3  
 FSH + Ad-E versus FSH + Ad-FOXO1(A3), 24 hours

|      | A          | B    | C   | D     | E    | F     | G |
|------|------------|------|-----|-------|------|-------|---|
| 3930 | Ccdc149    | 1.21 | 48  | 4.01  | 66   | 4.85  |   |
| 3931 | Pvrl1      | 1.21 | 179 | 11.67 | 291  | 14.12 |   |
| 3932 | Tmem33     | 1.21 | 164 | 10.33 | 267  | 12.5  |   |
| 3933 | Eogt       | 1.21 | 113 | 8.02  | 170  | 9.71  |   |
| 3934 | Rb1        | 1.21 | 155 | 8.8   | 262  | 10.64 |   |
| 3935 | Taok2      | 1.21 | 314 | 15.09 | 455  | 18.26 |   |
| 3936 | Med28      | 1.21 | 59  | 9.53  | 93   | 11.53 |   |
| 3937 | C4a_2      | 1.21 | 10  | 5.91  | 12   | 7.14  |   |
| 3938 | LOC361646  | 1.21 | 126 | 4.63  | 206  | 5.6   |   |
| 3939 | Baz2b      | 1.21 | 347 | 11.22 | 537  | 13.56 |   |
| 3940 | Elk4       | 1.21 | 155 | 12.81 | 252  | 15.49 |   |
| 3941 | Clk1       | 1.21 | 358 | 47.96 | 571  | 57.98 |   |
| 3942 | Phkb       | 1.21 | 180 | 6.4   | 262  | 7.73  |   |
| 3943 | Plekha7    | 1.21 | 164 | 5.79  | 257  | 6.99  |   |
| 3944 | Ei24       | 1.21 | 171 | 28.64 | 269  | 34.61 |   |
| 3945 | Os9        | 1.21 | 277 | 35.48 | 452  | 42.86 |   |
| 3946 | Arhgap1    | 1.21 | 347 | 39.19 | 569  | 47.35 |   |
| 3947 | Ipo9       | 1.21 | 328 | 26.14 | 532  | 31.57 |   |
| 3948 | Paqr3      | 1.21 | 24  | 2.53  | 37   | 3.06  |   |
| 3949 | Rpp38      | 1.21 | 17  | 3.95  | 23   | 4.76  |   |
| 3950 | Gli3       | 1.21 | 158 | 7.48  | 259  | 9.03  |   |
| 3951 | Ldlrap1    | 1.21 | 27  | 5.11  | 46   | 6.17  |   |
| 3952 | Rrp15      | 1.21 | 31  | 5.43  | 46   | 6.55  |   |
| 3953 | Slc37a3    | 1.21 | 208 | 22.47 | 321  | 27.13 |   |
| 3954 | Smn1       | 1.21 | 58  | 9.83  | 97   | 11.88 |   |
| 3955 | Tsr3       | 1.21 | 11  | 3.31  | 17   | 3.99  |   |
| 3956 | Zfp277     | 1.21 | 221 | 16.66 | 393  | 20.12 |   |
| 3957 | Midn       | 1.21 | 366 | 38.21 | 586  | 46.13 |   |
| 3958 | Pik3c2a    | 1.21 | 251 | 8.36  | 404  | 10.09 |   |
| 3959 | Zmym4      | 1.21 | 261 | 9.56  | 434  | 11.54 |   |
| 3960 | Arhgap23   | 1.21 | 253 | 12.66 | 419  | 15.29 |   |
| 3961 | Rnase4     | 1.21 | 11  | 18.29 | 15   | 22.07 |   |
| 3962 | Sptlc2     | 1.21 | 76  | 10.97 | 135  | 13.24 |   |
| 3963 | Gigyf2     | 1.21 | 227 | 7.84  | 351  | 9.46  |   |
| 3964 | Pip4k2a    | 1.21 | 169 | 17.34 | 281  | 20.91 |   |
| 3965 | Cep44      | 1.21 | 147 | 20.4  | 221  | 24.61 |   |
| 3966 | Parp4      | 1.21 | 164 | 11.43 | 261  | 13.79 |   |
| 3967 | Hgs        | 1.21 | 287 | 26.56 | 447  | 32.04 |   |
| 3968 | Smim7      | 1.21 | 111 | 29.94 | 173  | 36.11 |   |
| 3969 | Caprin1    | 1.21 | 857 | 77.45 | 1366 | 93.41 |   |
| 3970 | Ick        | 1.21 | 93  | 7.16  | 135  | 8.63  |   |
| 3971 | Smg1       | 1.21 | 464 | 13.18 | 728  | 15.89 |   |
| 3972 | Dpyd       | 1.21 | 126 | 4.07  | 242  | 4.91  |   |
| 3973 | Ptk2       | 1.21 | 288 | 19.52 | 482  | 23.53 |   |
| 3974 | Krr1       | 1.2  | 47  | 7.86  | 74   | 9.47  |   |
| 3975 | Rab2b      | 1.2  | 73  | 11.33 | 104  | 13.65 |   |
| 3976 | Tubb6      | 1.2  | 57  | 11.17 | 95   | 13.45 |   |
| 3977 | AC103129.3 | 1.2  | 5   | 3.35  | 6    | 4.04  |   |
| 3978 | Knop1_2    | 1.2  | 31  | 10.11 | 53   | 12.18 |   |
| 3979 | Mfsd9      | 1.2  | 21  | 2.08  | 32   | 2.5   |   |
| 3980 | Taf5       | 1.2  | 24  | 2.01  | 52   | 2.42  |   |
| 3981 | Srfbp1     | 1.2  | 95  | 5.96  | 157  | 7.18  |   |
| 3982 | Pgap1      | 1.2  | 50  | 4.57  | 85   | 5.5   |   |
| 3983 | Snrpd3     | 1.2  | 83  | 40.62 | 145  | 48.88 |   |

Supplemental Table 3  
 FSH + Ad-E versus FSH + Ad-FOXO1(A3), 24 hours

|      | A              | B   | C   | D     | E   | F      | G |
|------|----------------|-----|-----|-------|-----|--------|---|
| 3984 | Brwd3          | 1.2 | 76  | 4.29  | 129 | 5.16   |   |
| 3985 | Cept1          | 1.2 | 108 | 10.93 | 172 | 13.15  |   |
| 3986 | Rabgap1        | 1.2 | 429 | 23.1  | 699 | 27.8   |   |
| 3987 | Ssu72          | 1.2 | 154 | 22.32 | 205 | 26.86  |   |
| 3988 | Nbn            | 1.2 | 120 | 11.76 | 178 | 14.15  |   |
| 3989 | Stxbp1         | 1.2 | 91  | 8.73  | 157 | 10.5   |   |
| 3990 | Prpf18         | 1.2 | 215 | 7.75  | 370 | 9.33   |   |
| 3991 | Adh4           | 1.2 | 173 | 11.11 | 277 | 13.37  |   |
| 3992 | Ccdc88a        | 1.2 | 109 | 5.26  | 187 | 6.32   |   |
| 3993 | Cdadc1         | 1.2 | 38  | 6.45  | 63  | 7.76   |   |
| 3994 | Lrsam1         | 1.2 | 37  | 3.81  | 64  | 4.58   |   |
| 3995 | Mast2          | 1.2 | 413 | 20.99 | 739 | 25.24  |   |
| 3996 | Synpo          | 1.2 | 265 | 23.76 | 441 | 28.57  |   |
| 3997 | Zdhhc5         | 1.2 | 225 | 28.65 | 372 | 34.46  |   |
| 3998 | Eed            | 1.2 | 78  | 9.17  | 117 | 11.03  |   |
| 3999 | Ift172         | 1.2 | 60  | 3.6   | 102 | 4.33   |   |
| 4000 | Map3k7         | 1.2 | 3   | 8.13  | 6   | 9.78   |   |
| 4001 | Gabbr1         | 1.2 | 210 | 12.47 | 322 | 14.99  |   |
| 4002 | Nsmaf          | 1.2 | 133 | 9.17  | 196 | 11.02  |   |
| 4003 | Peg12          | 1.2 | 28  | 3.89  | 45  | 4.68   |   |
| 4004 | Pink1          | 1.2 | 116 | 16.83 | 187 | 20.22  |   |
| 4005 | Nf2            | 1.2 | 361 | 18.48 | 620 | 22.21  |   |
| 4006 | Tmx3           | 1.2 | 78  | 16    | 130 | 19.22  |   |
| 4007 | Lpin1          | 1.2 | 89  | 7.73  | 144 | 9.29   |   |
| 4008 | Rbm34          | 1.2 | 55  | 4.17  | 85  | 5      |   |
| 4009 | Cenpc          | 1.2 | 46  | 3.97  | 99  | 4.76   |   |
| 4010 | Ctns           | 1.2 | 50  | 6.85  | 92  | 8.22   |   |
| 4011 | Eya3           | 1.2 | 410 | 29.72 | 665 | 35.66  |   |
| 4012 | Tspan12        | 1.2 | 51  | 5.42  | 82  | 6.51   |   |
| 4013 | Atat1          | 1.2 | 172 | 9.95  | 243 | 11.94  |   |
| 4014 | Dnajb5         | 1.2 | 41  | 4.47  | 68  | 5.37   |   |
| 4015 | Rad50          | 1.2 | 141 | 8.33  | 212 | 9.99   |   |
| 4016 | Cacna2d1       | 1.2 | 247 | 7.21  | 293 | 8.65   |   |
| 4017 | Sbno2          | 1.2 | 197 | 8.47  | 319 | 10.16  |   |
| 4018 | Clip2          | 1.2 | 122 | 7.27  | 214 | 8.71   |   |
| 4019 | Armcx1_2       | 1.2 | 9   | 9.03  | 15  | 10.83  |   |
| 4020 | LOC690468      | 1.2 | 16  | 63.33 | 25  | 75.94  |   |
| 4021 | Sh3rf1         | 1.2 | 92  | 3.72  | 129 | 4.46   |   |
| 4022 | LOC100910454   | 1.2 | 317 | 30.14 | 527 | 36.14  |   |
| 4023 | Zfp292         | 1.2 | 271 | 8.25  | 437 | 9.89   |   |
| 4024 | Mycbp2         | 1.2 | 337 | 10.93 | 535 | 13.1   |   |
| 4025 | Nom1           | 1.2 | 91  | 9.39  | 131 | 11.25  |   |
| 4026 | Suv420h1       | 1.2 | 215 | 8.67  | 310 | 10.39  |   |
| 4027 | Cc2d1a         | 1.2 | 120 | 11.5  | 209 | 13.78  |   |
| 4028 | Ssb            | 1.2 | 96  | 23.84 | 158 | 28.55  |   |
| 4029 | Abl1           | 1.2 | 175 | 26.58 | 322 | 31.83  |   |
| 4030 | Ifi2712b       | 1.2 | 125 | 98.75 | 207 | 118.24 |   |
| 4031 | Ilk            | 1.2 | 405 | 84.31 | 653 | 100.94 |   |
| 4032 | Ddx31          | 1.2 | 52  | 2.18  | 97  | 2.61   |   |
| 4033 | Figl1          | 1.2 | 6   | 0.63  | 8   | 0.75   |   |
| 4034 | Gpatch11       | 1.2 | 30  | 2.26  | 48  | 2.71   |   |
| 4035 | SNORD25        | 1.2 | 5   | 25.86 | 8   | 30.94  |   |
| 4036 | AABR07045680.1 | 1.2 | 14  | 4.55  | 17  | 5.45   |   |
| 4037 | AC108574.2     | 1.2 | 94  | 11.63 | 144 | 13.91  |   |

Supplemental Table 3  
 FSH + Ad-E versus FSH + Ad-FOXO1(A3), 24 hours

|      | A          | B    | C   | D     | E    | F     | G |
|------|------------|------|-----|-------|------|-------|---|
| 4038 | Acd        | 1.2  | 42  | 18.42 | 65   | 22.03 |   |
| 4039 | Acsm3      | 1.2  | 21  | 0.71  | 28   | 0.85  |   |
| 4040 | Adal       | 1.2  | 7   | 1.13  | 10   | 1.35  |   |
| 4041 | Ccrn4l     | 1.2  | 10  | 1.39  | 16   | 1.66  |   |
| 4042 | Cd302      | 1.2  | 10  | 1.5   | 12   | 1.79  |   |
| 4043 | Col4a6     | 1.2  | 12  | 0.37  | 11   | 0.44  |   |
| 4044 | Cpeb3      | 1.2  | 51  | 0.68  | 60   | 0.81  |   |
| 4045 | Dlg1       | 1.2  | 244 | 12.39 | 376  | 14.82 |   |
| 4046 | Efcab2     | 1.2  | 49  | 0.65  | 65   | 0.77  |   |
| 4047 | Enthd2     | 1.2  | 49  | 5.88  | 83   | 7.03  |   |
| 4048 | Fam102b    | 1.2  | 31  | 5.95  | 58   | 7.11  |   |
| 4049 | Fam107b    | 1.2  | 19  | 1.73  | 31   | 2.06  |   |
| 4050 | Grik2      | 1.2  | 44  | 0.37  | 54   | 0.44  |   |
| 4051 | Itgb4      | 1.2  | 6   | 0.27  | 11   | 0.32  |   |
| 4052 | Kif1a      | 1.2  | 18  | 0.95  | 28   | 1.13  |   |
| 4053 | Krt18      | 1.2  | 5   | 1.32  | 9    | 1.58  |   |
| 4054 | Magee1     | 1.2  | 15  | 1.52  | 24   | 1.82  |   |
| 4055 | Mis12      | 1.2  | 20  | 11.66 | 32   | 13.95 |   |
| 4056 | Neil1      | 1.2  | 27  | 4.19  | 37   | 5.01  |   |
| 4057 | Nupl2      | 1.2  | 40  | 2.23  | 84   | 2.67  |   |
| 4058 | Pak7       | 1.2  | 23  | 0.42  | 27   | 0.5   |   |
| 4059 | Paxbp1     | 1.2  | 214 | 11.16 | 314  | 13.35 |   |
| 4060 | Ptgfr      | 1.2  | 5   | 0.6   | 8    | 0.72  |   |
| 4061 | Rel2       | 1.2  | 3   | 1.04  | 7    | 1.25  |   |
| 4062 | RGD1359108 | 1.2  | 32  | 5.02  | 42   | 6     |   |
| 4063 | Rp9        | 1.2  | 45  | 5.07  | 85   | 6.07  |   |
| 4064 | Sh3bgr     | 1.2  | 4   | 1.58  | 7    | 1.89  |   |
| 4065 | Slc25a18   | 1.2  | 8   | 0.92  | 10   | 1.1   |   |
| 4066 | Slc25a2    | 1.2  | 5   | 1.51  | 8    | 1.81  |   |
| 4067 | Slc30a7    | 1.2  | 67  | 8.91  | 106  | 10.66 |   |
| 4068 | Tmem168    | 1.2  | 88  | 13.83 | 133  | 16.55 |   |
| 4069 | Tmem170a   | 1.2  | 36  | 2.68  | 55   | 3.2   |   |
| 4070 | Tmem5      | 1.2  | 41  | 2.82  | 67   | 3.38  |   |
| 4071 | Tmlhe      | 1.2  | 50  | 4.85  | 76   | 5.81  |   |
| 4072 | Uxt        | 1.2  | 43  | 24.14 | 79   | 28.87 |   |
| 4073 | Zfp566     | 1.2  | 24  | 3.21  | 47   | 3.84  |   |
| 4074 | Efs        | 1.2  | 11  | 0.84  | 16   | 1.01  |   |
| 4075 | Gas7       | 1.2  | 11  | 0.67  | 14   | 0.8   |   |
| 4076 | Ogt        | 1.2  | 902 | 44.36 | 1425 | 53.05 |   |
| 4077 | Carhsp1    | 1.2  | 371 | 43.54 | 603  | 52.05 |   |
| 4078 | Dnaja2     | 1.2  | 178 | 30.93 | 285  | 36.97 |   |
| 4079 | Cltc       | 1.2  | 176 | 47    | 283  | 56.17 |   |
| 4080 | Tax1bp1    | 1.2  | 497 | 43    | 770  | 51.39 |   |
| 4081 | Zzef1      | 1.19 | 146 | 4.36  | 283  | 5.21  |   |
| 4082 | Ankrd17    | 1.19 | 609 | 17.96 | 956  | 21.46 |   |
| 4083 | Zfp91      | 1.19 | 218 | 14.01 | 339  | 16.73 |   |
| 4084 | Klf3       | 1.19 | 180 | 12.63 | 297  | 15.09 |   |
| 4085 | Trip4      | 1.19 | 138 | 6.7   | 193  | 8     |   |
| 4086 | Cpeb4      | 1.19 | 122 | 9.73  | 190  | 11.62 |   |
| 4087 | Nfic       | 1.19 | 85  | 16.66 | 135  | 19.89 |   |
| 4088 | Hiat1_1    | 1.19 | 38  | 24.18 | 54   | 28.87 |   |
| 4089 | Simc1      | 1.19 | 98  | 5.88  | 153  | 7.02  |   |
| 4090 | Eftud1     | 1.19 | 90  | 6.01  | 144  | 7.17  |   |
| 4091 | Snx13      | 1.19 | 91  | 6.72  | 131  | 8.03  |   |

Supplemental Table 3  
 FSH + Ad-E versus FSH + Ad-FOXO1(A3), 24 hours

|      | A            | B    | C   | D      | E    | F     | G |
|------|--------------|------|-----|--------|------|-------|---|
| 4092 | R3hdm2       | 1.19 | 326 | 20.33  | 551  | 24.27 |   |
| 4093 | Nol7         | 1.19 | 73  | 9.67   | 100  | 11.54 |   |
| 4094 | Cct4         | 1.19 | 433 | 69.67  | 687  | 83.13 |   |
| 4095 | Rragc        | 1.19 | 164 | 21.67  | 267  | 25.86 |   |
| 4096 | Hspa4        | 1.19 | 801 | 59.28  | 1306 | 70.73 |   |
| 4097 | Ckap5        | 1.19 | 377 | 21.08  | 624  | 25.15 |   |
| 4098 | Rrp1         | 1.19 | 63  | 9.3    | 95   | 11.1  |   |
| 4099 | Gprasp1      | 1.19 | 174 | 9.83   | 289  | 11.73 |   |
| 4100 | Pik3r1       | 1.19 | 261 | 14.64  | 408  | 17.46 |   |
| 4101 | RGD1563812   | 1.19 | 60  | 35.36  | 100  | 42.18 |   |
| 4102 | Trit1        | 1.19 | 142 | 7.2    | 182  | 8.58  |   |
| 4103 | Usp22        | 1.19 | 308 | 47.5   | 491  | 56.65 |   |
| 4104 | Pnn          | 1.19 | 169 | 20.92  | 273  | 24.95 |   |
| 4105 | Dcun1d5      | 1.19 | 77  | 11.11  | 103  | 13.24 |   |
| 4106 | Limd2        | 1.19 | 127 | 40.48  | 210  | 48.23 |   |
| 4107 | Znrd1        | 1.19 | 39  | 13.74  | 55   | 16.38 |   |
| 4108 | Ctnnal1      | 1.19 | 295 | 21.26  | 515  | 25.33 |   |
| 4109 | Cdc73        | 1.19 | 86  | 10.32  | 140  | 12.3  |   |
| 4110 | Wdr48        | 1.19 | 198 | 16.21  | 327  | 19.31 |   |
| 4111 | Heatr5b      | 1.19 | 287 | 12.16  | 450  | 14.48 |   |
| 4112 | Arpc4        | 1.19 | 234 | 56.27  | 378  | 67.01 |   |
| 4113 | Oxr1         | 1.19 | 176 | 9.52   | 298  | 11.34 |   |
| 4114 | Fam98a       | 1.19 | 93  | 10.92  | 146  | 13    |   |
| 4115 | Manea        | 1.19 | 129 | 10.4   | 215  | 12.39 |   |
| 4116 | LOC100910717 | 1.19 | 515 | 25.2   | 807  | 30    |   |
| 4117 | Mtmr14       | 1.19 | 88  | 6.68   | 134  | 7.95  |   |
| 4118 | Nckap1       | 1.19 | 608 | 60.79  | 991  | 72.33 |   |
| 4119 | Cdk7         | 1.19 | 82  | 11.64  | 114  | 13.84 |   |
| 4120 | LOC100911865 | 1.19 | 19  | 2.42   | 21   | 2.88  |   |
| 4121 | Mrps18c      | 1.19 | 23  | 9.85   | 39   | 11.71 |   |
| 4122 | Pms1         | 1.19 | 37  | 2.68   | 75   | 3.19  |   |
| 4123 | Scg3         | 1.19 | 25  | 3.72   | 43   | 4.42  |   |
| 4124 | Sde2         | 1.19 | 99  | 9.89   | 157  | 11.76 |   |
| 4125 | Ywhaq        | 1.19 | 654 | 110.05 | 1064 | 130.9 |   |
| 4126 | Zfp39        | 1.19 | 584 | 1.94   | 733  | 2.31  |   |
| 4127 | Pikfyve      | 1.19 | 194 | 6.44   | 302  | 7.65  |   |
| 4128 | Dram2        | 1.19 | 114 | 15.78  | 208  | 18.76 |   |
| 4129 | Ube2g1       | 1.19 | 167 | 18.62  | 274  | 22.13 |   |
| 4130 | Ube2j1       | 1.19 | 123 | 27.62  | 201  | 32.83 |   |
| 4131 | Eil2         | 1.19 | 90  | 6.12   | 122  | 7.28  |   |
| 4132 | Fam13b       | 1.19 | 210 | 16.84  | 348  | 20.02 |   |
| 4133 | Ugdh         | 1.19 | 159 | 20.92  | 248  | 24.86 |   |
| 4134 | Tom1l2       | 1.19 | 233 | 13.55  | 378  | 16.1  |   |
| 4135 | Hiatl1       | 1.19 | 157 | 17.17  | 248  | 20.4  |   |
| 4136 | Nhlrc3       | 1.19 | 79  | 10.07  | 135  | 11.96 |   |
| 4137 | Ufc1         | 1.19 | 74  | 19.55  | 110  | 23.23 |   |
| 4138 | Clcn6        | 1.19 | 146 | 8.45   | 245  | 10.03 |   |
| 4139 | Klc1         | 1.19 | 194 | 17.68  | 357  | 21    |   |
| 4140 | Fhod3        | 1.19 | 764 | 36.45  | 1177 | 43.29 |   |
| 4141 | Herc1        | 1.19 | 310 | 6.59   | 506  | 7.82  |   |
| 4142 | Ralb         | 1.19 | 55  | 8.97   | 90   | 10.65 |   |
| 4143 | Abca16       | 1.19 | 54  | 1.24   | 76   | 1.47  |   |
| 4144 | Golga2       | 1.19 | 193 | 17.73  | 304  | 21.05 |   |
| 4145 | Rbfox2       | 1.19 | 205 | 10.2   | 357  | 12.11 |   |

Supplemental Table 3  
 FSH + Ad-E versus FSH + Ad-FOXO1(A3), 24 hours

|      | A              | B    | C    | D      | E    | F      | G |
|------|----------------|------|------|--------|------|--------|---|
| 4146 | Vhl            | 1.19 | 141  | 17.06  | 233  | 20.25  |   |
| 4147 | Esd            | 1.19 | 108  | 21.25  | 172  | 25.22  |   |
| 4148 | Hlhf           | 1.19 | 75   | 4.69   | 121  | 5.57   |   |
| 4149 | Meis1          | 1.19 | 680  | 28.92  | 1413 | 34.32  |   |
| 4150 | LOC100151767   | 1.19 | 83   | 9.67   | 150  | 11.47  |   |
| 4151 | Rbm33          | 1.19 | 172  | 13.38  | 278  | 15.88  |   |
| 4152 | Stxbp3         | 1.19 | 125  | 10.76  | 201  | 12.76  |   |
| 4153 | Vps13d         | 1.19 | 463  | 9.76   | 758  | 11.58  |   |
| 4154 | Ccnl2          | 1.19 | 383  | 25.23  | 556  | 29.92  |   |
| 4155 | Mthfd1l        | 1.19 | 47   | 2.81   | 72   | 3.33   |   |
| 4156 | Scyl2          | 1.19 | 237  | 15.39  | 373  | 18.25  |   |
| 4157 | Zfp276         | 1.19 | 44   | 4.14   | 77   | 4.91   |   |
| 4158 | Pnlsr          | 1.19 | 345  | 20.03  | 509  | 23.74  |   |
| 4159 | Papln          | 1.19 | 54   | 3.24   | 75   | 3.84   |   |
| 4160 | Rras           | 1.19 | 41   | 15.63  | 67   | 18.52  |   |
| 4161 | Tarbp2         | 1.19 | 54   | 10.11  | 82   | 11.98  |   |
| 4162 | Pacsln2        | 1.19 | 146  | 9.69   | 220  | 11.49  |   |
| 4163 | Rn60_15_0408.6 | 1.18 | 10   | 3.8    | 10   | 4.5    |   |
| 4164 | Rbpj_2         | 1.18 | 472  | 43.42  | 767  | 51.44  |   |
| 4165 | Bms1           | 1.18 | 144  | 11.15  | 230  | 13.21  |   |
| 4166 | Dcps           | 1.18 | 92   | 19.47  | 154  | 23.06  |   |
| 4167 | LOC688906      | 1.18 | 295  | 12.93  | 464  | 15.32  |   |
| 4168 | Ccz1b          | 1.18 | 133  | 17.98  | 199  | 21.3   |   |
| 4169 | Tnfaip1        | 1.18 | 431  | 37.91  | 668  | 44.9   |   |
| 4170 | Dnajc21        | 1.18 | 27   | 4.63   | 43   | 5.49   |   |
| 4171 | Setmar         | 1.18 | 17   | 1.81   | 25   | 2.14   |   |
| 4172 | Aagab          | 1.18 | 53   | 11.97  | 79   | 14.17  |   |
| 4173 | Dnajc1         | 1.18 | 68   | 4.65   | 94   | 5.51   |   |
| 4174 | Fbxo25         | 1.18 | 26   | 4.06   | 48   | 4.8    |   |
| 4175 | Haus3          | 1.18 | 15   | 2.12   | 29   | 2.5    |   |
| 4176 | Pcp4l1         | 1.18 | 20   | 2.83   | 57   | 3.35   |   |
| 4177 | Rexo2          | 1.18 | 90   | 21.83  | 166  | 25.84  |   |
| 4178 | Setd7          | 1.18 | 84   | 8.79   | 133  | 10.41  |   |
| 4179 | Slc19a2        | 1.18 | 35   | 2.2    | 54   | 2.6    |   |
| 4180 | Thoc1_1        | 1.18 | 66   | 17.38  | 108  | 20.57  |   |
| 4181 | Zfp142         | 1.18 | 190  | 7.72   | 302  | 9.14   |   |
| 4182 | Zrsr2          | 1.18 | 59   | 2.97   | 100  | 3.52   |   |
| 4183 | Ppp2r3c        | 1.18 | 59   | 7.53   | 93   | 8.91   |   |
| 4184 | RGD1306001     | 1.18 | 16   | 4.77   | 25   | 5.65   |   |
| 4185 | Tubb2b         | 1.18 | 288  | 110.03 | 461  | 130.23 |   |
| 4186 | Hnrnpf         | 1.18 | 507  | 89.21  | 788  | 105.58 |   |
| 4187 | Erlin2         | 1.18 | 182  | 16.46  | 291  | 19.48  |   |
| 4188 | Sipa1l2        | 1.18 | 222  | 9.47   | 367  | 11.2   |   |
| 4189 | Marf1          | 1.18 | 0    | 10.69  | 0    | 12.65  |   |
| 4190 | Tnks1bp1       | 1.18 | 183  | 10.37  | 299  | 12.26  |   |
| 4191 | Clu            | 1.18 | 1294 | 249.42 | 2068 | 294.92 |   |
| 4192 | Pdgfc          | 1.18 | 210  | 22.93  | 326  | 27.11  |   |
| 4193 | Rab3ip         | 1.18 | 65   | 8.27   | 106  | 9.78   |   |
| 4194 | Raly           | 1.18 | 523  | 107.13 | 841  | 126.66 |   |
| 4195 | Plaa           | 1.18 | 125  | 15.72  | 207  | 18.59  |   |
| 4196 | Tgfb1          | 1.18 | 76   | 12.52  | 126  | 14.8   |   |
| 4197 | Otud5          | 1.18 | 285  | 29.88  | 446  | 35.32  |   |
| 4198 | AABR07067737.1 | 1.18 | 50   | 1.01   | 76   | 1.2    |   |
| 4199 | Caprin2        | 1.18 | 49   | 3.63   | 65   | 4.29   |   |

Supplemental Table 3  
 FSH + Ad-E versus FSH + Ad-FOXO1(A3), 24 hours

|      | A              | B    | C    | D      | E    | F      | G |
|------|----------------|------|------|--------|------|--------|---|
| 4200 | Wdr44          | 1.18 | 43   | 2.43   | 92   | 2.87   |   |
| 4201 | Psmc4          | 1.18 | 226  | 49.77  | 364  | 58.8   |   |
| 4202 | Dis3l2         | 1.18 | 242  | 9.65   | 356  | 11.4   |   |
| 4203 | Vprbp          | 1.18 | 203  | 10.34  | 313  | 12.22  |   |
| 4204 | Pex2           | 1.18 | 66   | 11.15  | 109  | 13.18  |   |
| 4205 | Pms2           | 1.18 | 79   | 6.19   | 116  | 7.31   |   |
| 4206 | Eif3e          | 1.18 | 111  | 42.48  | 121  | 50.17  |   |
| 4207 | Nbas           | 1.18 | 350  | 11.81  | 566  | 13.95  |   |
| 4208 | Phrf1          | 1.18 | 298  | 16.98  | 455  | 20.05  |   |
| 4209 | Phka1          | 1.18 | 594  | 29.97  | 956  | 35.39  |   |
| 4210 | Prnp           | 1.18 | 565  | 93.98  | 903  | 110.96 |   |
| 4211 | AC097890.1     | 1.18 | 8    | 3.55   | 12   | 4.19   |   |
| 4212 | Arl2           | 1.18 | 793  | 7.51   | 988  | 8.87   |   |
| 4213 | Kctd21         | 1.18 | 19   | 2.37   | 32   | 2.8    |   |
| 4214 | Ube2q1         | 1.18 | 186  | 28.07  | 281  | 33.12  |   |
| 4215 | Kdm3b          | 1.18 | 421  | 20.29  | 664  | 23.94  |   |
| 4216 | Ide            | 1.18 | 358  | 21.55  | 556  | 25.43  |   |
| 4217 | Mtf2           | 1.18 | 119  | 9.09   | 177  | 10.73  |   |
| 4218 | Cnot8          | 1.18 | 175  | 25.34  | 282  | 29.9   |   |
| 4219 | Ccdc186        | 1.18 | 62   | 5.9    | 106  | 6.96   |   |
| 4220 | Itpkc          | 1.18 | 62   | 4.95   | 87   | 5.84   |   |
| 4221 | RGD1307929     | 1.18 | 506  | 24.72  | 783  | 29.15  |   |
| 4222 | AABR07065438.1 | 1.18 | 21   | 57.88  | 21   | 68.25  |   |
| 4223 | Ctdp1          | 1.18 | 224  | 13.68  | 293  | 16.12  |   |
| 4224 | Snrpd2         | 1.18 | 39   | 20.27  | 49   | 23.89  |   |
| 4225 | Zfp449         | 1.18 | 30   | 2.41   | 46   | 2.84   |   |
| 4226 | Cyth3          | 1.18 | 63   | 4.81   | 96   | 5.67   |   |
| 4227 | Ptar1          | 1.18 | 56   | 5.9    | 92   | 6.95   |   |
| 4228 | Plec           | 1.18 | 951  | 19.66  | 1500 | 23.18  |   |
| 4229 | Gbbp111        | 1.18 | 94   | 19.94  | 149  | 23.5   |   |
| 4230 | Acsf2          | 1.18 | 38   | 3.88   | 60   | 4.57   |   |
| 4231 | Fam219a        | 1.18 | 52   | 4.77   | 89   | 5.61   |   |
| 4232 | Oxsr1          | 1.18 | 237  | 14.88  | 367  | 17.53  |   |
| 4233 | Fam20c         | 1.18 | 140  | 13.79  | 219  | 16.24  |   |
| 4234 | Mt-nd4l        | 1.18 | 243  | 714.38 | 434  | 841.24 |   |
| 4235 | Ddx27          | 1.18 | 102  | 10.79  | 157  | 12.7   |   |
| 4236 | Pkia           | 1.18 | 60   | 7.35   | 85   | 8.65   |   |
| 4237 | Sbno1          | 1.18 | 243  | 13.56  | 372  | 15.96  |   |
| 4238 | Fbxw8          | 1.18 | 211  | 11.95  | 316  | 14.06  |   |
| 4239 | Tbc1d9b        | 1.18 | 304  | 17.19  | 474  | 20.24  |   |
| 4240 | Atf4           | 1.18 | 322  | 82.69  | 511  | 97.33  |   |
| 4241 | Wnt5a          | 1.18 | 51   | 3.41   | 81   | 4.01   |   |
| 4242 | Klf16          | 1.18 | 49   | 6.57   | 78   | 7.73   |   |
| 4243 | Cul3           | 1.18 | 220  | 17.12  | 353  | 20.15  |   |
| 4244 | Mat2b          | 1.18 | 158  | 23.03  | 231  | 27.1   |   |
| 4245 | Slc38a2        | 1.18 | 1107 | 82.8   | 1738 | 97.41  |   |
| 4246 | Nol9           | 1.18 | 79   | 11.48  | 127  | 13.5   |   |
| 4247 | Bmpr1a         | 1.18 | 217  | 23.46  | 318  | 27.59  |   |
| 4248 | Tbc1d5         | 1.18 | 364  | 13.83  | 618  | 16.27  |   |
| 4249 | Igf2r          | 1.18 | 631  | 15.91  | 1204 | 18.7   |   |
| 4250 | Atxn2l         | 1.18 | 411  | 33.54  | 650  | 39.42  |   |
| 4251 | Ddx17          | 1.18 | 1562 | 86.2   | 2369 | 101.29 |   |
| 4252 | Apobr          | 1.17 | 7    | 0.59   | 10   | 0.69   |   |
| 4253 | Cyp2s1         | 1.17 | 19   | 1.93   | 31   | 2.26   |   |

Supplemental Table 3  
 FSH + Ad-E versus FSH + Ad-FOXO1(A3), 24 hours

|      | A              | B    | C    | D       | E    | F      | G |
|------|----------------|------|------|---------|------|--------|---|
| 4254 | Ili4i1         | 1.17 | 15   | 1.29    | 20   | 1.52   |   |
| 4255 | RGD1561590     | 1.17 | 51   | 50.09   | 87   | 58.85  |   |
| 4256 | Rnf6           | 1.17 | 99   | 16.44   | 149  | 19.32  |   |
| 4257 | Rtp4           | 1.17 | 8    | 1.31    | 14   | 1.54   |   |
| 4258 | Suv39h2        | 1.17 | 12   | 0.58    | 16   | 0.68   |   |
| 4259 | AABR07013202.1 | 1.17 | 5    | 2.99    | 8    | 3.51   |   |
| 4260 | AABR07044711.1 | 1.17 | 1    | 1.73    | 2    | 2.04   |   |
| 4261 | Abca8          | 1.17 | 24   | 1.04    | 27   | 1.22   |   |
| 4262 | Arap1          | 1.17 | 209  | 12.49   | 333  | 14.68  |   |
| 4263 | AY172581.18    | 1.17 | 6    | 35.2    | 10   | 41.36  |   |
| 4264 | Dctpp1         | 1.17 | 7    | 3.93    | 11   | 4.62   |   |
| 4265 | Dnajc27        | 1.17 | 25   | 1.56    | 35   | 1.84   |   |
| 4266 | Gipc2          | 1.17 | 13   | 2.03    | 16   | 2.38   |   |
| 4267 | Gli4           | 1.17 | 48   | 4.45    | 68   | 5.23   |   |
| 4268 | Herc6          | 1.17 | 15   | 0.71    | 21   | 0.83   |   |
| 4269 | Htatip2        | 1.17 | 12   | 1.83    | 22   | 2.15   |   |
| 4270 | Igsf1          | 1.17 | 9    | 0.58    | 16   | 0.68   |   |
| 4271 | Irf4           | 1.17 | 16   | 1.05    | 27   | 1.24   |   |
| 4272 | LOC679582      | 1.17 | 19   | 1.16    | 21   | 1.36   |   |
| 4273 | Mettl13        | 1.17 | 46   | 3.52    | 68   | 4.14   |   |
| 4274 | Mis18bp1       | 1.17 | 31   | 1.37    | 42   | 1.61   |   |
| 4275 | Nhlrc1         | 1.17 | 7    | 2.13    | 11   | 2.5    |   |
| 4276 | P2rx7          | 1.17 | 8    | 0.66    | 11   | 0.78   |   |
| 4277 | Pdss2          | 1.17 | 107  | 4.89    | 154  | 5.75   |   |
| 4278 | Pgpep1         | 1.17 | 65   | 12.12   | 97   | 14.24  |   |
| 4279 | Poc1a          | 1.17 | 12   | 2.3     | 24   | 2.7    |   |
| 4280 | Rn60_10_0702.4 | 1.17 | 19   | 2.6     | 27   | 3.05   |   |
| 4281 | Slc6a4         | 1.17 | 14   | 0.77    | 15   | 0.91   |   |
| 4282 | Slc9a3r2       | 1.17 | 7    | 1.18    | 12   | 1.39   |   |
| 4283 | Thap2          | 1.17 | 16   | 3.88    | 27   | 4.55   |   |
| 4284 | Vma21          | 1.17 | 26   | 4.95    | 49   | 5.81   |   |
| 4285 | Gdi2           | 1.17 | 467  | 72.78   | 716  | 85.49  |   |
| 4286 | Top2b          | 1.17 | 393  | 20.52   | 616  | 24.09  |   |
| 4287 | Ablim1         | 1.17 | 1246 | 51.52   | 2104 | 60.5   |   |
| 4288 | Morc2          | 1.17 | 186  | 11.79   | 280  | 13.84  |   |
| 4289 | Erp44          | 1.17 | 173  | 34.43   | 277  | 40.42  |   |
| 4290 | Ints8          | 1.17 | 208  | 15.99   | 341  | 18.78  |   |
| 4291 | Ppip5k2        | 1.17 | 164  | 7.21    | 253  | 8.46   |   |
| 4292 | Brd3           | 1.17 | 241  | 22.72   | 365  | 26.66  |   |
| 4293 | Ubr7           | 1.17 | 122  | 10.63   | 190  | 12.46  |   |
| 4294 | Mme            | 1.17 | 369  | 38.39   | 594  | 45.02  |   |
| 4295 | Ggps1          | 1.17 | 107  | 5.72    | 183  | 6.7    |   |
| 4296 | Tmem199        | 1.17 | 45   | 11.85   | 71   | 13.9   |   |
| 4297 | Josd1          | 1.17 | 136  | 17.67   | 233  | 20.71  |   |
| 4298 | AABR07015081.2 | 1.17 | 472  | 1026.95 | 565  | 1203.9 |   |
| 4299 | Cdc23          | 1.17 | 215  | 19.58   | 300  | 22.95  |   |
| 4300 | Fam45a         | 1.17 | 56   | 10.37   | 100  | 12.15  |   |
| 4301 | Ipo8           | 1.17 | 108  | 12.12   | 167  | 14.2   |   |
| 4302 | Sod1           | 1.17 | 495  | 263.82  | 816  | 309.07 |   |
| 4303 | Fancm          | 1.17 | 88   | 3.31    | 134  | 3.88   |   |
| 4304 | Tfeb           | 1.17 | 31   | 4.61    | 53   | 5.4    |   |
| 4305 | Adk            | 1.17 | 202  | 21.66   | 309  | 25.37  |   |
| 4306 | Rasl11b        | 1.17 | 64   | 11.84   | 104  | 13.87  |   |
| 4307 | Dnajc13        | 1.17 | 365  | 14.27   | 583  | 16.71  |   |



Supplemental Table 3  
 FSH + Ad-E versus FSH + Ad-FOXO1(A3), 24 hours

|      | A            | B    | C   | D      | E    | F      | G |
|------|--------------|------|-----|--------|------|--------|---|
| 4308 | Snx8         | 1.17 | 77  | 7.33   | 135  | 8.59   |   |
| 4309 | Nop2         | 1.17 | 58  | 11.87  | 65   | 13.89  |   |
| 4310 | Ccdc43       | 1.17 | 50  | 7.3    | 76   | 8.54   |   |
| 4311 | Ccdc9        | 1.17 | 137 | 14.19  | 198  | 16.6   |   |
| 4312 | Oxsm         | 1.17 | 28  | 2.68   | 39   | 3.14   |   |
| 4313 | Polr2m_1     | 1.17 | 190 | 21.01  | 313  | 24.59  |   |
| 4314 | Rab2a        | 1.17 | 125 | 49.56  | 221  | 57.97  |   |
| 4315 | Zfp317       | 1.17 | 42  | 6.59   | 71   | 7.71   |   |
| 4316 | Maz          | 1.17 | 121 | 27.83  | 185  | 32.54  |   |
| 4317 | Qk           | 1.17 | 434 | 24     | 673  | 28.06  |   |
| 4318 | Zfand6       | 1.17 | 178 | 20.4   | 288  | 23.84  |   |
| 4319 | Tab2         | 1.17 | 309 | 21.93  | 490  | 25.63  |   |
| 4320 | Nr1d2        | 1.17 | 211 | 14.92  | 351  | 17.44  |   |
| 4321 | Ddx59        | 1.17 | 43  | 5.39   | 67   | 6.3    |   |
| 4322 | Esrra        | 1.17 | 40  | 5.37   | 77   | 6.28   |   |
| 4323 | Fam114a2     | 1.17 | 96  | 15.45  | 134  | 18.05  |   |
| 4324 | Ptgr2        | 1.17 | 119 | 9.64   | 191  | 11.26  |   |
| 4325 | Tnip2        | 1.17 | 37  | 3.63   | 55   | 4.24   |   |
| 4326 | Dlg3         | 1.17 | 67  | 2.87   | 101  | 3.35   |   |
| 4327 | LOC257650    | 1.17 | 79  | 3.03   | 116  | 3.54   |   |
| 4328 | Rpl9         | 1.17 | 13  | 354.64 | 8    | 414.26 |   |
| 4329 | Cct6a        | 1.17 | 303 | 52.95  | 500  | 61.84  |   |
| 4330 | Setd2        | 1.17 | 455 | 16.11  | 700  | 18.8   |   |
| 4331 | Ccnh         | 1.17 | 103 | 10.6   | 182  | 12.37  |   |
| 4332 | Vcpip1       | 1.17 | 171 | 12.84  | 252  | 14.98  |   |
| 4333 | Ppp6r2       | 1.17 | 152 | 12.69  | 204  | 14.81  |   |
| 4334 | Ubqln4       | 1.17 | 296 | 28.84  | 470  | 33.65  |   |
| 4335 | Stau1        | 1.17 | 237 | 22.5   | 387  | 26.25  |   |
| 4336 | RGD1561252   | 1.17 | 4   | 9.9    | 5    | 11.55  |   |
| 4337 | Agpat9       | 1.17 | 30  | 2.97   | 48   | 3.46   |   |
| 4338 | Exosc7       | 1.17 | 45  | 8.69   | 64   | 10.13  |   |
| 4339 | Gkap1        | 1.17 | 141 | 10.02  | 222  | 11.69  |   |
| 4340 | LOC100911625 | 1.17 | 0   | 3.84   | 0    | 4.48   |   |
| 4341 | Polr3k       | 1.17 | 27  | 9.38   | 43   | 10.94  |   |
| 4342 | Supt16h      | 1.17 | 258 | 21.42  | 404  | 24.98  |   |
| 4343 | Ginm1        | 1.17 | 160 | 41.49  | 264  | 48.37  |   |
| 4344 | Uri1         | 1.17 | 186 | 14.21  | 288  | 16.56  |   |
| 4345 | Nphp3        | 1.17 | 52  | 2.79   | 68   | 3.25   |   |
| 4346 | Papss2       | 1.17 | 58  | 3.41   | 78   | 3.97   |   |
| 4347 | Nsun2        | 1.17 | 156 | 10.79  | 238  | 12.57  |   |
| 4348 | Lman2l       | 1.17 | 160 | 12.69  | 223  | 14.79  |   |
| 4349 | Mdk          | 1.17 | 81  | 38.67  | 119  | 45.05  |   |
| 4350 | RGD1309995   | 1.17 | 159 | 11.41  | 236  | 13.29  |   |
| 4351 | Numb         | 1.16 | 143 | 17.5   | 254  | 20.38  |   |
| 4352 | Copb2        | 1.16 | 263 | 39.79  | 405  | 46.34  |   |
| 4353 | Usp6nl       | 1.16 | 307 | 16.72  | 495  | 19.47  |   |
| 4354 | Wdr26        | 1.16 | 528 | 28.78  | 834  | 33.53  |   |
| 4355 | LOC102551071 | 1.16 | 749 | 167.16 | 1201 | 194.66 |   |
| 4356 | Slc25a46     | 1.16 | 95  | 8.35   | 159  | 9.72   |   |
| 4357 | Crebbp       | 1.16 | 432 | 13.19  | 690  | 15.35  |   |
| 4358 | Tbc1d8b      | 1.16 | 88  | 5.02   | 135  | 5.84   |   |
| 4359 | Fkbp11       | 1.16 | 522 | 39.57  | 825  | 46.05  |   |
| 4360 | Ankfy1       | 1.16 | 493 | 20.92  | 753  | 24.35  |   |
| 4361 | Rif1         | 1.16 | 152 | 6.19   | 225  | 7.21   |   |

Supplemental Table 3  
 FSH + Ad-E versus FSH + Ad-FOXO1(A3), 24 hours

|      | A              | B    | C    | D      | E    | F      | G |
|------|----------------|------|------|--------|------|--------|---|
| 4362 | Psma4          | 1.16 | 153  | 45.18  | 239  | 52.57  |   |
| 4363 | Ltn1           | 1.16 | 193  | 8.44   | 286  | 9.82   |   |
| 4364 | Tax1bp3        | 1.16 | 255  | 76.95  | 412  | 89.51  |   |
| 4365 | AC099294.1     | 1.16 | 0    | 1.45   | 0    | 1.68   |   |
| 4366 | Ccdc84         | 1.16 | 29   | 3.26   | 44   | 3.79   |   |
| 4367 | Etfp           | 1.16 | 151  | 28.99  | 261  | 33.71  |   |
| 4368 | Fam169a        | 1.16 | 22   | 3.27   | 39   | 3.8    |   |
| 4369 | Micu3          | 1.16 | 30   | 1.75   | 46   | 2.03   |   |
| 4370 | Ociad2         | 1.16 | 10   | 8.23   | 17   | 9.57   |   |
| 4371 | Wdpcp          | 1.16 | 55   | 2.5    | 98   | 2.9    |   |
| 4372 | AABR07035818.1 | 1.16 | 51   | 28.14  | 76   | 32.73  |   |
| 4373 | Aldh1a7        | 1.16 | 9    | 2.17   | 11   | 2.53   |   |
| 4374 | Camta1_1       | 1.16 | 70   | 6.08   | 116  | 7.07   |   |
| 4375 | Gabarapl1      | 1.16 | 219  | 44.45  | 338  | 51.7   |   |
| 4376 | Glul           | 1.16 | 329  | 47.21  | 512  | 54.9   |   |
| 4377 | Lbhd1          | 1.16 | 17   | 10.12  | 28   | 11.77  |   |
| 4378 | Pex7           | 1.16 | 26   | 4.2    | 45   | 4.88   |   |
| 4379 | Shank2_2       | 1.16 | 9    | 0.34   | 11   | 0.39   |   |
| 4380 | Syn3           | 1.16 | 131  | 1.44   | 135  | 1.67   |   |
| 4381 | Tob2           | 1.16 | 47   | 5.65   | 69   | 6.57   |   |
| 4382 | Tuba1c_1       | 1.16 | 0    | 2.42   | 0    | 2.81   |   |
| 4383 | Ube2l6         | 1.16 | 10   | 2.31   | 16   | 2.69   |   |
| 4384 | Zbtb8a         | 1.16 | 16   | 1.52   | 28   | 1.77   |   |
| 4385 | Eif3a          | 1.16 | 679  | 46.06  | 1052 | 53.56  |   |
| 4386 | Cab39          | 1.16 | 303  | 24.18  | 473  | 28.12  |   |
| 4387 | Vps11          | 1.16 | 280  | 26.01  | 431  | 30.24  |   |
| 4388 | Pkd2           | 1.16 | 303  | 18.44  | 483  | 21.43  |   |
| 4389 | Asah1          | 1.16 | 366  | 44.82  | 588  | 52.08  |   |
| 4390 | Slx4           | 1.16 | 180  | 8.39   | 268  | 9.75   |   |
| 4391 | Rprd1b         | 1.16 | 91   | 6.59   | 124  | 7.65   |   |
| 4392 | Rps28_1        | 1.16 | 33   | 69.42  | 49   | 80.65  |   |
| 4393 | Cyb561a3       | 1.16 | 56   | 7.55   | 92   | 8.77   |   |
| 4394 | Xpo6           | 1.16 | 256  | 15.95  | 400  | 18.52  |   |
| 4395 | Mff_2          | 1.16 | 167  | 82.69  | 227  | 96.01  |   |
| 4396 | Zcchc14        | 1.16 | 156  | 13.79  | 256  | 16.01  |   |
| 4397 | Zfp609         | 1.16 | 334  | 11.31  | 546  | 13.13  |   |
| 4398 | Stx6           | 1.16 | 158  | 19.4   | 252  | 22.52  |   |
| 4399 | Rps6ka3        | 1.16 | 515  | 21.98  | 843  | 25.51  |   |
| 4400 | Atg3           | 1.16 | 59   | 9.88   | 101  | 11.47  |   |
| 4401 | Lcmt1          | 1.16 | 71   | 10.18  | 111  | 11.81  |   |
| 4402 | Cttn_2         | 1.16 | 0    | 18.99  | 0    | 22.04  |   |
| 4403 | Zfyve26        | 1.16 | 192  | 6.21   | 303  | 7.21   |   |
| 4404 | Evi5l          | 1.16 | 50   | 5.28   | 71   | 6.12   |   |
| 4405 | Fbxl3-ps1      | 1.16 | 31   | 2.42   | 47   | 2.81   |   |
| 4406 | Rsf1           | 1.16 | 168  | 9.03   | 263  | 10.47  |   |
| 4407 | Mt-nd2         | 1.16 | 3182 | 1121.4 | 4962 | 1300.6 |   |
| 4408 | Sh3bp5         | 1.16 | 81   | 6.95   | 124  | 8.06   |   |
| 4409 | Acox3          | 1.16 | 107  | 9.63   | 163  | 11.17  |   |
| 4410 | Tsr2           | 1.16 | 51   | 5.76   | 69   | 6.68   |   |
| 4411 | Clpx           | 1.16 | 116  | 13.48  | 170  | 15.63  |   |
| 4412 | Bche           | 1.16 | 134  | 7.27   | 215  | 8.43   |   |
| 4413 | Ccnt2          | 1.16 | 274  | 10.82  | 402  | 12.55  |   |
| 4414 | H6pd           | 1.16 | 42   | 3.07   | 69   | 3.55   |   |
| 4415 | Ppme1          | 1.16 | 130  | 14.86  | 180  | 17.22  |   |

Supplemental Table 3  
 FSH + Ad-E versus FSH + Ad-FOXO1(A3), 24 hours

|      | A          | B    | C   | D     | E    | F      | G |
|------|------------|------|-----|-------|------|--------|---|
| 4416 | Pdcd11     | 1.16 | 283 | 13.39 | 439  | 15.51  |   |
| 4417 | Pds5b      | 1.16 | 278 | 9.88  | 445  | 11.44  |   |
| 4418 | Arfgef2    | 1.16 | 223 | 8.06  | 350  | 9.34   |   |
| 4419 | Nop58      | 1.16 | 147 | 18.44 | 220  | 21.35  |   |
| 4420 | Grsf1      | 1.16 | 209 | 22.42 | 306  | 25.97  |   |
| 4421 | Atxn7l3b   | 1.16 | 349 | 36.05 | 538  | 41.74  |   |
| 4422 | Higd1a     | 1.16 | 39  | 7.36  | 59   | 8.53   |   |
| 4423 | Rab4a      | 1.16 | 37  | 7.96  | 59   | 9.22   |   |
| 4424 | Gm12258    | 1.16 | 63  | 5.45  | 97   | 6.31   |   |
| 4425 | Phf21a     | 1.16 | 319 | 20.56 | 482  | 23.81  |   |
| 4426 | Akirin1    | 1.16 | 91  | 11.17 | 152  | 12.93  |   |
| 4427 | Ccar1      | 1.16 | 233 | 13.71 | 388  | 15.86  |   |
| 4428 | Kif3c      | 1.16 | 62  | 4.45  | 93   | 5.15   |   |
| 4429 | Rnf144a    | 1.16 | 52  | 2.94  | 84   | 3.4    |   |
| 4430 | Kihl20     | 1.16 | 67  | 3.94  | 102  | 4.56   |   |
| 4431 | Slc24a5    | 1.16 | 66  | 11.74 | 119  | 13.58  |   |
| 4432 | Ttbk2      | 1.16 | 80  | 4.32  | 108  | 5      |   |
| 4433 | Faim_2     | 1.16 | 23  | 19.64 | 35   | 22.71  |   |
| 4434 | Insig1     | 1.16 | 339 | 67.03 | 553  | 77.52  |   |
| 4435 | Tfg        | 1.16 | 216 | 36.29 | 351  | 41.96  |   |
| 4436 | lds        | 1.16 | 198 | 41.91 | 314  | 48.45  |   |
| 4437 | Setd5      | 1.16 | 730 | 29.07 | 1185 | 33.6   |   |
| 4438 | Kif3b      | 1.16 | 113 | 5.69  | 172  | 6.58   |   |
| 4439 | Ep400      | 1.16 | 555 | 16.81 | 856  | 19.43  |   |
| 4440 | Pak2_1     | 1.16 | 205 | 26.12 | 345  | 30.19  |   |
| 4441 | Zfp106     | 1.16 | 338 | 18.24 | 516  | 21.09  |   |
| 4442 | Phldb3     | 1.16 | 32  | 4.16  | 51   | 4.8    |   |
| 4443 | Arhgap31   | 1.16 | 404 | 19.73 | 704  | 22.8   |   |
| 4444 | Arl6       | 1.16 | 34  | 4.3   | 53   | 4.97   |   |
| 4445 | Ccdc34     | 1.16 | 16  | 1.57  | 22   | 1.82   |   |
| 4446 | Ccna2      | 1.16 | 9   | 1.69  | 16   | 1.95   |   |
| 4447 | Fance      | 1.16 | 44  | 4.29  | 54   | 4.96   |   |
| 4448 | Mbnl3      | 1.16 | 28  | 1.98  | 51   | 2.28   |   |
| 4449 | N6amt2     | 1.16 | 27  | 1.9   | 32   | 2.2    |   |
| 4450 | RGD1308147 | 1.16 | 33  | 6.05  | 51   | 6.99   |   |
| 4451 | Rin3       | 1.16 | 19  | 1.03  | 28   | 1.18   |   |
| 4452 | Rsbm1l     | 1.16 | 110 | 8.22  | 180  | 9.5    |   |
| 4453 | Slc26a8    | 1.16 | 48  | 1.27  | 34   | 1.47   |   |
| 4454 | Zak        | 1.16 | 67  | 10.01 | 100  | 11.56  |   |
| 4455 | lfrd2      | 1.16 | 23  | 4.07  | 35   | 4.71   |   |
| 4456 | Mettl20    | 1.16 | 31  | 4.96  | 49   | 5.73   |   |
| 4457 | Pgrmc2     | 1.15 | 153 | 28.74 | 242  | 33.19  |   |
| 4458 | Anp32a     | 1.15 | 365 | 93.3  | 545  | 107.76 |   |
| 4459 | Dusp3      | 1.15 | 114 | 8.99  | 173  | 10.38  |   |
| 4460 | Pank4      | 1.15 | 108 | 10.54 | 156  | 12.17  |   |
| 4461 | Sh2d4a     | 1.15 | 406 | 44.58 | 622  | 51.46  |   |
| 4462 | Samd9l     | 1.15 | 68  | 3.59  | 118  | 4.14   |   |
| 4463 | AC106292.2 | 1.15 | 81  | 25.57 | 125  | 29.5   |   |
| 4464 | Csrnp2     | 1.15 | 78  | 6.45  | 92   | 7.45   |   |
| 4465 | Scoc       | 1.15 | 89  | 17.33 | 143  | 20     |   |
| 4466 | Pum2       | 1.15 | 715 | 34.71 | 1064 | 40.03  |   |
| 4467 | Ccdc71     | 1.15 | 71  | 15.46 | 110  | 17.84  |   |
| 4468 | Kdm1b      | 1.15 | 53  | 3.02  | 70   | 3.48   |   |
| 4469 | Mkks       | 1.15 | 44  | 4.27  | 69   | 4.92   |   |

Supplemental Table 3  
 FSH + Ad-E versus FSH + Ad-FOXO1(A3), 24 hours

|      | A             | B    | C   | D     | E    | F     | G |
|------|---------------|------|-----|-------|------|-------|---|
| 4470 | Zfp709        | 1.15 | 46  | 4.61  | 70   | 5.32  |   |
| 4471 | Dock7         | 1.15 | 443 | 18.55 | 677  | 21.4  |   |
| 4472 | Tnrc6a        | 1.15 | 506 | 17.78 | 797  | 20.51 |   |
| 4473 | RGD1561931    | 1.15 | 131 | 5.24  | 210  | 6.04  |   |
| 4474 | Poc1b         | 1.15 | 135 | 5.93  | 173  | 6.83  |   |
| 4475 | Cyca_1        | 1.15 | 50  | 28.97 | 86   | 33.39 |   |
| 4476 | Dgcr14        | 1.15 | 13  | 5.03  | 14   | 5.8   |   |
| 4477 | Ikkg          | 1.15 | 27  | 5.99  | 48   | 6.9   |   |
| 4478 | Jmjd8         | 1.15 | 51  | 11.51 | 80   | 13.27 |   |
| 4479 | Rrp7a         | 1.15 | 8   | 3.82  | 13   | 4.41  |   |
| 4480 | Kank1         | 1.15 | 649 | 35.96 | 986  | 41.45 |   |
| 4481 | Tial1         | 1.15 | 120 | 18.6  | 214  | 21.43 |   |
| 4482 | Prkx          | 1.15 | 78  | 6.61  | 124  | 7.62  |   |
| 4483 | Impa1         | 1.15 | 97  | 13.1  | 151  | 15.09 |   |
| 4484 | Alg10         | 1.15 | 112 | 17.23 | 178  | 19.84 |   |
| 4485 | Selk          | 1.15 | 62  | 31.55 | 105  | 36.32 |   |
| 4486 | Ap2b1         | 1.15 | 519 | 42.13 | 820  | 48.5  |   |
| 4487 | Ndufa8        | 1.15 | 84  | 27.11 | 136  | 31.2  |   |
| 4488 | Ssfa2         | 1.15 | 196 | 11.27 | 311  | 12.96 |   |
| 4489 | Ccdc102a      | 1.15 | 79  | 8.19  | 130  | 9.42  |   |
| 4490 | Dusp12        | 1.15 | 20  | 3.68  | 34   | 4.23  |   |
| 4491 | Ttc21b        | 1.15 | 120 | 7.15  | 194  | 8.23  |   |
| 4492 | Afap1         | 1.15 | 134 | 6.4   | 209  | 7.36  |   |
| 4493 | Coa4          | 1.15 | 13  | 3.45  | 20   | 3.97  |   |
| 4494 | E2f8          | 1.15 | 14  | 1.79  | 23   | 2.06  |   |
| 4495 | Gtf3a         | 1.15 | 63  | 10.61 | 82   | 12.2  |   |
| 4496 | LOC100125364  | 1.15 | 69  | 9.27  | 101  | 10.67 |   |
| 4497 | Mex3b         | 1.15 | 78  | 8.33  | 122  | 9.58  |   |
| 4498 | Rn60_6_0863.2 | 1.15 | 2   | 4.38  | 3    | 5.04  |   |
| 4499 | Rn60_6_1241.2 | 1.15 | 41  | 2     | 69   | 2.3   |   |
| 4500 | Tti2          | 1.15 | 34  | 4.9   | 43   | 5.64  |   |
| 4501 | Ufm1          | 1.15 | 40  | 6.62  | 68   | 7.61  |   |
| 4502 | Tep1          | 1.15 | 364 | 14.96 | 579  | 17.21 |   |
| 4503 | Rbm3          | 1.15 | 317 | 60.15 | 473  | 69.16 |   |
| 4504 | Arhgap35      | 1.15 | 483 | 18.27 | 733  | 21    |   |
| 4505 | Snx1          | 1.15 | 77  | 23.57 | 127  | 27.1  |   |
| 4506 | Rpl17         | 1.15 | 89  | 65.08 | 120  | 74.83 |   |
| 4507 | Itpr1         | 1.15 | 745 | 20.02 | 1239 | 23.01 |   |
| 4508 | Nucks1        | 1.15 | 117 | 25.35 | 166  | 29.14 |   |
| 4509 | Dkc1          | 1.15 | 262 | 37.23 | 365  | 42.78 |   |
| 4510 | Tp53inp2      | 1.15 | 392 | 33.65 | 594  | 38.64 |   |
| 4511 | Abhd17c       | 1.15 | 111 | 13.97 | 173  | 16.04 |   |
| 4512 | Pdpf          | 1.15 | 56  | 30.72 | 88   | 35.27 |   |
| 4513 | Tfpi          | 1.15 | 111 | 7.86  | 159  | 9.02  |   |
| 4514 | Whsc1         | 1.15 | 292 | 14.23 | 486  | 16.34 |   |
| 4515 | Ttc37         | 1.15 | 115 | 7.38  | 170  | 8.47  |   |
| 4516 | Ranbp2        | 1.15 | 462 | 17.44 | 719  | 20.02 |   |
| 4517 | Scaf8         | 1.15 | 266 | 18.03 | 426  | 20.7  |   |
| 4518 | Pex13         | 1.15 | 81  | 10.06 | 123  | 11.54 |   |
| 4519 | Slc7a1        | 1.15 | 85  | 3.9   | 130  | 4.48  |   |
| 4520 | Hdgfrp3       | 1.15 | 87  | 6.62  | 162  | 7.59  |   |
| 4521 | Mttr2         | 1.15 | 166 | 22.66 | 260  | 26.01 |   |
| 4522 | Uhmk1         | 1.15 | 73  | 12.73 | 128  | 14.61 |   |
| 4523 | Prdm4         | 1.15 | 117 | 11.58 | 184  | 13.29 |   |

Supplemental Table 3  
 FSH + Ad-E versus FSH + Ad-FOXO1(A3), 24 hours

|      | A            | B    | C   | D     | E   | F     | G |
|------|--------------|------|-----|-------|-----|-------|---|
| 4524 | Zbtb10       | 1.15 | 60  | 3.3   | 92  | 3.78  |   |
| 4525 | Eif4e2       | 1.15 | 104 | 15.58 | 166 | 17.87 |   |
| 4526 | Gtf3c3       | 1.15 | 127 | 4.96  | 187 | 5.7   |   |
| 4527 | Lamb1        | 1.15 | 390 | 23.99 | 599 | 27.52 |   |
| 4528 | Kdelc2       | 1.15 | 543 | 50.05 | 837 | 57.43 |   |
| 4529 | Tmem43       | 1.15 | 441 | 55    | 673 | 63.1  |   |
| 4530 | Vwa9         | 1.15 | 117 | 14.05 | 167 | 16.11 |   |
| 4531 | Egln2        | 1.15 | 168 | 18.77 | 254 | 21.52 |   |
| 4532 | Chmp4bl1     | 1.15 | 43  | 20.97 | 77  | 24.04 |   |
| 4533 | Ctsh         | 1.15 | 33  | 6.19  | 49  | 7.1   |   |
| 4534 | Elmo3        | 1.15 | 25  | 2.26  | 32  | 2.59  |   |
| 4535 | Kif11        | 1.15 | 53  | 3.44  | 78  | 3.95  |   |
| 4536 | Oard1        | 1.15 | 24  | 3.92  | 34  | 4.49  |   |
| 4537 | Ankrd49      | 1.15 | 33  | 5.08  | 52  | 5.82  |   |
| 4538 | Appl2        | 1.15 | 195 | 16.49 | 288 | 18.9  |   |
| 4539 | Slc31a2      | 1.15 | 41  | 6.15  | 55  | 7.05  |   |
| 4540 | RGD1560341   | 1.15 | 106 | 30.57 | 158 | 35.03 |   |
| 4541 | Fkbp1a       | 1.15 | 336 | 74.01 | 517 | 84.81 |   |
| 4542 | Pnpla2       | 1.15 | 0   | 14.77 | 0   | 16.93 |   |
| 4543 | Rnmt         | 1.15 | 126 | 8.44  | 193 | 9.66  |   |
| 4544 | Tia1         | 1.15 | 201 | 15.32 | 286 | 17.55 |   |
| 4545 | Prim1        | 1.15 | 107 | 17.47 | 162 | 20.01 |   |
| 4546 | Wac          | 1.15 | 289 | 43.22 | 439 | 49.52 |   |
| 4547 | Arfgef1      | 1.15 | 378 | 17.73 | 612 | 20.31 |   |
| 4548 | Rfx7         | 1.15 | 284 | 9.87  | 404 | 11.3  |   |
| 4549 | Ncam1        | 1.15 | 58  | 3.85  | 99  | 4.41  |   |
| 4550 | RGD1564541   | 1.15 | 52  | 4.71  | 81  | 5.4   |   |
| 4551 | Ubp1         | 1.15 | 173 | 19.37 | 262 | 22.18 |   |
| 4552 | Cenpe        | 1.15 | 208 | 7.51  | 299 | 8.6   |   |
| 4553 | Rab28        | 1.15 | 126 | 16.97 | 192 | 19.43 |   |
| 4554 | Ash2l        | 1.14 | 187 | 21.37 | 272 | 24.47 |   |
| 4555 | Chka         | 1.14 | 105 | 4.48  | 164 | 5.13  |   |
| 4556 | Ppm1f        | 1.14 | 152 | 9.9   | 221 | 11.33 |   |
| 4557 | Slc30a6      | 1.14 | 66  | 5.99  | 78  | 6.86  |   |
| 4558 | LOC100910990 | 1.14 | 0   | 6.63  | 0   | 7.59  |   |
| 4559 | Nudcd1       | 1.14 | 71  | 6.2   | 114 | 7.09  |   |
| 4560 | Vimp         | 1.14 | 132 | 35.58 | 213 | 40.72 |   |
| 4561 | Zfp295       | 1.14 | 105 | 5.68  | 152 | 6.5   |   |
| 4562 | Arhgap5      | 1.14 | 280 | 17.67 | 416 | 20.22 |   |
| 4563 | Prkab2       | 1.14 | 65  | 3.56  | 97  | 4.08  |   |
| 4564 | Nup54        | 1.14 | 72  | 7.51  | 96  | 8.59  |   |
| 4565 | Smg7         | 1.14 | 234 | 13.48 | 351 | 15.43 |   |
| 4566 | Snx11        | 1.14 | 79  | 8.31  | 117 | 9.51  |   |
| 4567 | Rps6ka4      | 1.14 | 111 | 11.62 | 170 | 13.29 |   |
| 4568 | Mgat1        | 1.14 | 271 | 35.19 | 429 | 40.24 |   |
| 4569 | Gnal         | 1.14 | 135 | 3.59  | 130 | 4.1   |   |
| 4570 | Zfp212       | 1.14 | 39  | 8.32  | 63  | 9.52  |   |
| 4571 | Aga          | 1.14 | 116 | 26.04 | 172 | 29.77 |   |
| 4572 | Cdc7         | 1.14 | 19  | 2.11  | 33  | 2.41  |   |
| 4573 | Prpf3        | 1.14 | 124 | 12.82 | 191 | 14.66 |   |
| 4574 | Tcf7         | 1.14 | 33  | 3.97  | 47  | 4.54  |   |
| 4575 | Usp4         | 1.14 | 254 | 19.54 | 402 | 22.34 |   |
| 4576 | Vps39        | 1.14 | 251 | 13.84 | 454 | 15.83 |   |
| 4577 | Gnai3        | 1.14 | 320 | 32.84 | 463 | 37.55 |   |

Supplemental Table 3  
 FSH + Ad-E versus FSH + Ad-FOXO1(A3), 24 hours

|      | A            | B    | C    | D      | E    | F      | G |
|------|--------------|------|------|--------|------|--------|---|
| 4578 | Hn1          | 1.14 | 301  | 58.86  | 440  | 67.28  |   |
| 4579 | RGD1559904   | 1.14 | 242  | 13.13  | 367  | 15     |   |
| 4580 | Zfp280d      | 1.14 | 160  | 7.18   | 252  | 8.2    |   |
| 4581 | Wasf2        | 1.14 | 122  | 12.06  | 196  | 13.78  |   |
| 4582 | Pdpk1        | 1.14 | 99   | 10.21  | 158  | 11.67  |   |
| 4583 | Smg8         | 1.14 | 60   | 5.13   | 88   | 5.86   |   |
| 4584 | Tle1         | 1.14 | 133  | 11.81  | 232  | 13.49  |   |
| 4585 | Spg11        | 1.14 | 206  | 6.31   | 303  | 7.21   |   |
| 4586 | Ddx54        | 1.14 | 130  | 13.92  | 197  | 15.9   |   |
| 4587 | Stambp       | 1.14 | 51   | 6.75   | 77   | 7.71   |   |
| 4588 | Paip1        | 1.14 | 194  | 21.9   | 299  | 25.01  |   |
| 4589 | Ddx3x        | 1.14 | 824  | 63.99  | 1252 | 73.08  |   |
| 4590 | Zfp799       | 1.14 | 56   | 9.16   | 86   | 10.46  |   |
| 4591 | Ddi2         | 1.14 | 310  | 10.45  | 474  | 11.94  |   |
| 4592 | Cnbp         | 1.14 | 418  | 89.08  | 666  | 101.72 |   |
| 4593 | Hsbp1        | 1.14 | 260  | 70.2   | 401  | 80.14  |   |
| 4594 | Ddx6         | 1.14 | 441  | 47.37  | 687  | 54.08  |   |
| 4595 | Fndc3a       | 1.14 | 213  | 11.54  | 397  | 13.18  |   |
| 4596 | Sdf2         | 1.14 | 184  | 32.13  | 275  | 36.68  |   |
| 4597 | Lamb2        | 1.14 | 1675 | 101.1  | 2577 | 115.39 |   |
| 4598 | Flcn         | 1.14 | 188  | 17.82  | 292  | 20.34  |   |
| 4599 | Eif3j        | 1.14 | 206  | 33.79  | 314  | 38.56  |   |
| 4600 | Ccbe1        | 1.14 | 346  | 106.73 | 550  | 121.81 |   |
| 4601 | Hdlbp        | 1.14 | 2253 | 106.77 | 3420 | 121.85 |   |
| 4602 | Ccdc6        | 1.14 | 86   | 9.74   | 121  | 11.11  |   |
| 4603 | E2f5         | 1.14 | 38   | 6.78   | 64   | 7.74   |   |
| 4604 | Jak2         | 1.14 | 105  | 7.18   | 181  | 8.2    |   |
| 4605 | Mcat         | 1.14 | 32   | 3.62   | 51   | 4.13   |   |
| 4606 | Rora         | 1.14 | 66   | 4.07   | 90   | 4.65   |   |
| 4607 | Prkar2a      | 1.14 | 185  | 20.24  | 284  | 23.09  |   |
| 4608 | Npc1         | 1.14 | 244  | 17.61  | 350  | 20.09  |   |
| 4609 | Tubgcp5      | 1.14 | 155  | 9.49   | 248  | 10.82  |   |
| 4610 | Vrk3         | 1.14 | 112  | 16.36  | 176  | 18.66  |   |
| 4611 | Arrdc1       | 1.14 | 74   | 13.54  | 115  | 15.44  |   |
| 4612 | Coq10b       | 1.14 | 75   | 13.18  | 121  | 15.03  |   |
| 4613 | Pptc7        | 1.14 | 189  | 8.49   | 270  | 9.69   |   |
| 4614 | Tox2         | 1.14 | 197  | 17.73  | 281  | 20.21  |   |
| 4615 | Ept1         | 1.14 | 57   | 5.56   | 92   | 6.34   |   |
| 4616 | LOC102547932 | 1.14 | 39   | 7.74   | 61   | 8.83   |   |
| 4617 | Pdcd7        | 1.14 | 62   | 6.42   | 83   | 7.32   |   |
| 4618 | Pfdn2        | 1.14 | 97   | 8.69   | 129  | 9.91   |   |
| 4619 | Mllt6        | 1.14 | 160  | 11.5   | 243  | 13.11  |   |
| 4620 | Map4k3       | 1.14 | 206  | 8.4    | 323  | 9.57   |   |
| 4621 | Rps7         | 1.14 | 104  | 345.98 | 150  | 394.24 |   |
| 4622 | Acad8        | 1.14 | 61   | 6.15   | 79   | 7.01   |   |
| 4623 | B4galt6      | 1.14 | 59   | 2.46   | 83   | 2.8    |   |
| 4624 | Capn2        | 1.14 | 381  | 34.64  | 591  | 39.46  |   |
| 4625 | Fam135a      | 1.14 | 154  | 5.59   | 221  | 6.37   |   |
| 4626 | March5       | 1.14 | 119  | 22.35  | 192  | 25.46  |   |
| 4627 | Sema3e       | 1.14 | 127  | 4.35   | 225  | 4.96   |   |
| 4628 | Snrnp35      | 1.14 | 37   | 6.87   | 50   | 7.82   |   |
| 4629 | Vamp8        | 1.14 | 23   | 25.34  | 47   | 28.87  |   |
| 4630 | Zfp259       | 1.14 | 75   | 7.88   | 124  | 8.97   |   |
| 4631 | Ccdc82       | 1.14 | 36   | 2.08   | 53   | 2.37   |   |

Supplemental Table 3  
 FSH + Ad-E versus FSH + Ad-FOXO1(A3), 24 hours

|      | A              | B    | C   | D      | E    | F      | G |
|------|----------------|------|-----|--------|------|--------|---|
| 4632 | Nfia           | 1.14 | 722 | 34.38  | 1165 | 39.16  |   |
| 4633 | Rpl23          | 1.14 | 326 | 205.52 | 497  | 234.09 |   |
| 4634 | Gpd2           | 1.14 | 116 | 6.57   | 160  | 7.49   |   |
| 4635 | Recql          | 1.14 | 92  | 6.49   | 148  | 7.38   |   |
| 4636 | Uqcrc2         | 1.14 | 293 | 56.97  | 466  | 64.85  |   |
| 4637 | Rfc1           | 1.14 | 175 | 11.88  | 271  | 13.53  |   |
| 4638 | Actr1a         | 1.14 | 436 | 52.6   | 672  | 59.87  |   |
| 4639 | Cyfip2         | 1.14 | 307 | 14.74  | 466  | 16.77  |   |
| 4640 | Ints10         | 1.14 | 120 | 9.11   | 176  | 10.37  |   |
| 4641 | Htatsf1        | 1.14 | 125 | 12.93  | 195  | 14.72  |   |
| 4642 | Rps25          | 1.14 | 152 | 331.17 | 151  | 376.8  |   |
| 4643 | Serinc5        | 1.14 | 948 | 58.99  | 1485 | 67.12  |   |
| 4644 | Akip1          | 1.14 | 45  | 4.67   | 72   | 5.31   |   |
| 4645 | Epb4.1l5       | 1.14 | 81  | 6.94   | 129  | 7.9    |   |
| 4646 | Terf2ip        | 1.14 | 51  | 7.55   | 74   | 8.59   |   |
| 4647 | Ddx50          | 1.14 | 153 | 13.21  | 214  | 15.03  |   |
| 4648 | Lpcat4         | 1.14 | 27  | 5.32   | 38   | 6.05   |   |
| 4649 | Dync1i2        | 1.14 | 349 | 38.63  | 578  | 43.95  |   |
| 4650 | Cdk19          | 1.14 | 236 | 10.22  | 340  | 11.62  |   |
| 4651 | Fbxo9          | 1.14 | 102 | 12.13  | 141  | 13.8   |   |
| 4652 | Rxra           | 1.14 | 95  | 12.95  | 147  | 14.73  |   |
| 4653 | Poll           | 1.14 | 50  | 7.57   | 80   | 8.61   |   |
| 4654 | Stip1          | 1.14 | 370 | 57.9   | 551  | 65.84  |   |
| 4655 | Cep85          | 1.14 | 95  | 5.8    | 158  | 6.59   |   |
| 4656 | Dcun1d1        | 1.14 | 106 | 3.41   | 142  | 3.87   |   |
| 4657 | Cdk13          | 1.14 | 230 | 12.13  | 354  | 13.79  |   |
| 4658 | S100pbp        | 1.14 | 244 | 12.5   | 344  | 14.2   |   |
| 4659 | Slc1a4         | 1.14 | 168 | 14.6   | 267  | 16.58  |   |
| 4660 | Dlat           | 1.14 | 73  | 11     | 118  | 12.49  |   |
| 4661 | Nup153         | 1.14 | 270 | 13.83  | 413  | 15.7   |   |
| 4662 | Slc20a1        | 1.14 | 151 | 12.41  | 220  | 14.09  |   |
| 4663 | Galnt11        | 1.14 | 165 | 18.06  | 290  | 20.5   |   |
| 4664 | Asb3           | 1.14 | 50  | 4.99   | 88   | 5.67   |   |
| 4665 | Rn60_13_0839.5 | 1.14 | 54  | 4.61   | 91   | 5.23   |   |
| 4666 | Prdm15         | 1.14 | 65  | 2.97   | 119  | 3.37   |   |
| 4667 | Mapk1ip1l      | 1.14 | 261 | 20.5   | 382  | 23.27  |   |
| 4668 | Ube2e3         | 1.13 | 216 | 41.87  | 339  | 47.52  |   |
| 4669 | Prdm2          | 1.13 | 334 | 14.56  | 499  | 16.53  |   |
| 4670 | Ncor1          | 1.13 | 743 | 27.11  | 1117 | 30.76  |   |
| 4671 | Dhx40          | 1.13 | 165 | 13.88  | 256  | 15.74  |   |
| 4672 | Parva          | 1.13 | 449 | 31.72  | 731  | 35.99  |   |
| 4673 | B4galt4        | 1.13 | 44  | 4.91   | 59   | 5.57   |   |
| 4674 | Orc3           | 1.13 | 157 | 13.13  | 237  | 14.89  |   |
| 4675 | Trim36         | 1.13 | 44  | 3.73   | 60   | 4.23   |   |
| 4676 | Wdr62_1        | 1.13 | 2   | 2.19   | 2    | 2.49   |   |
| 4677 | LOC100364791   | 1.13 | 160 | 15.55  | 249  | 17.62  |   |
| 4678 | Zfand2a        | 1.13 | 71  | 6.83   | 98   | 7.74   |   |
| 4679 | Ralbp1         | 1.13 | 241 | 26.72  | 365  | 30.27  |   |
| 4680 | Ppp6r3         | 1.13 | 411 | 22.61  | 611  | 25.6   |   |
| 4681 | Becn1          | 1.13 | 177 | 13.64  | 286  | 15.44  |   |
| 4682 | Plcl1          | 1.13 | 39  | 2.68   | 64   | 3.03   |   |
| 4683 | Ptprm          | 1.13 | 418 | 14.47  | 741  | 16.38  |   |
| 4684 | Ctsf           | 1.13 | 73  | 13.99  | 111  | 15.84  |   |
| 4685 | Mical1         | 1.13 | 79  | 7.37   | 130  | 8.34   |   |

Supplemental Table 3  
 FSH + Ad-E versus FSH + Ad-FOXO1(A3), 24 hours

|      | A              | B    | C    | D       | E    | F      | G |
|------|----------------|------|------|---------|------|--------|---|
| 4686 | Slain2         | 1.13 | 274  | 13.68   | 387  | 15.48  |   |
| 4687 | lqsec1         | 1.13 | 192  | 11.43   | 331  | 12.93  |   |
| 4688 | Rn60_14_0846.1 | 1.13 | 112  | 20.93   | 149  | 23.68  |   |
| 4689 | Cox20          | 1.13 | 102  | 13.03   | 174  | 14.75  |   |
| 4690 | Suv39h111      | 1.13 | 46   | 4.01    | 69   | 4.54   |   |
| 4691 | Ctcf           | 1.13 | 291  | 20.9    | 455  | 23.65  |   |
| 4692 | Cacna2d3       | 1.13 | 1614 | 12.71   | 2118 | 14.38  |   |
| 4693 | Cd59           | 1.13 | 203  | 47.09   | 305  | 53.26  |   |
| 4694 | Ndrp2          | 1.13 | 160  | 27.56   | 250  | 31.16  |   |
| 4695 | Mtpn           | 1.13 | 125  | 32.84   | 197  | 37.14  |   |
| 4696 | Chn2           | 1.13 | 209  | 11.63   | 339  | 13.15  |   |
| 4697 | Hs3st1         | 1.13 | 102  | 11.21   | 193  | 12.68  |   |
| 4698 | Srp68          | 1.13 | 223  | 21.05   | 320  | 23.8   |   |
| 4699 | Numbl          | 1.13 | 77   | 4.91    | 100  | 5.55   |   |
| 4700 | Rfc5           | 1.13 | 53   | 7.1     | 80   | 8.02   |   |
| 4701 | Irs1           | 1.13 | 532  | 28.27   | 815  | 31.95  |   |
| 4702 | Zfp638         | 1.13 | 268  | 12.17   | 424  | 13.76  |   |
| 4703 | Tapbp1         | 1.13 | 95   | 16.51   | 147  | 18.66  |   |
| 4704 | Ltv1           | 1.13 | 53   | 8.63    | 78   | 9.74   |   |
| 4705 | Mre11a         | 1.13 | 117  | 6.04    | 169  | 6.82   |   |
| 4706 | Rmnd1          | 1.13 | 102  | 8.17    | 138  | 9.23   |   |
| 4707 | Me3            | 1.13 | 146  | 16.04   | 323  | 18.12  |   |
| 4708 | Cecr5          | 1.13 | 77   | 9.39    | 105  | 10.6   |   |
| 4709 | Nae1           | 1.13 | 73   | 9.97    | 102  | 11.26  |   |
| 4710 | S100a10        | 1.13 | 355  | 218     | 546  | 246.13 |   |
| 4711 | Ube2d3         | 1.13 | 288  | 57      | 440  | 64.35  |   |
| 4712 | Eif2ak1        | 1.13 | 195  | 24.51   | 278  | 27.67  |   |
| 4713 | Pdcd6          | 1.13 | 141  | 24.6    | 225  | 27.76  |   |
| 4714 | Ryk            | 1.13 | 293  | 50.01   | 460  | 56.44  |   |
| 4715 | Strn3          | 1.13 | 289  | 13.87   | 451  | 15.65  |   |
| 4716 | Tmem126a       | 1.13 | 169  | 16.33   | 334  | 18.42  |   |
| 4717 | Creb3l1        | 1.13 | 61   | 7.82    | 95   | 8.82   |   |
| 4718 | Cltc           | 1.13 | 1239 | 71.65   | 1876 | 80.82  |   |
| 4719 | Zfp384         | 1.13 | 227  | 17.63   | 338  | 19.88  |   |
| 4720 | Fbxl19         | 1.13 | 67   | 7.14    | 109  | 8.05   |   |
| 4721 | Helb           | 1.13 | 49   | 4.67    | 94   | 5.27   |   |
| 4722 | Zfp219         | 1.13 | 174  | 23.37   | 256  | 26.35  |   |
| 4723 | Zbtb5          | 1.13 | 141  | 10.49   | 213  | 11.83  |   |
| 4724 | Rexo4          | 1.13 | 86   | 10.33   | 129  | 11.64  |   |
| 4725 | Spag7          | 1.13 | 84   | 19.82   | 116  | 22.34  |   |
| 4726 | Ace            | 1.13 | 71   | 3.94    | 110  | 4.44   |   |
| 4727 | Pfdn5          | 1.13 | 91   | 38.85   | 134  | 43.78  |   |
| 4728 | Wdr75          | 1.13 | 91   | 9.52    | 137  | 10.73  |   |
| 4729 | N4bp2          | 1.13 | 91   | 5.19    | 127  | 5.85   |   |
| 4730 | Rpl14          | 1.13 | 227  | 156.32  | 299  | 176.06 |   |
| 4731 | RGD1311899     | 1.13 | 87   | 20.23   | 129  | 22.78  |   |
| 4732 | Mk1            | 1.13 | 81   | 11.78   | 120  | 13.26  |   |
| 4733 | Rplp1_1        | 1.13 | 1704 | 2090.66 | 3332 | 2353.8 |   |
| 4734 | Odf2           | 1.13 | 235  | 13.35   | 336  | 15.03  |   |
| 4735 | Gga3           | 1.13 | 109  | 6.75    | 161  | 7.6    |   |
| 4736 | Gtpbp4         | 1.13 | 66   | 10.76   | 77   | 12.11  |   |
| 4737 | Yipf4          | 1.13 | 105  | 19.69   | 167  | 22.16  |   |
| 4738 | Cdc16          | 1.13 | 292  | 32.36   | 419  | 36.41  |   |
| 4739 | Gmps           | 1.13 | 133  | 16.36   | 189  | 18.4   |   |



Supplemental Table 3  
 FSH + Ad-E versus FSH + Ad-FOXO1(A3), 24 hours

|      | A              | B    | C   | D     | E    | F     | G |
|------|----------------|------|-----|-------|------|-------|---|
| 4740 | Api5           | 1.12 | 337 | 32.5  | 507  | 36.56 |   |
| 4741 | Stk40          | 1.12 | 134 | 11.38 | 193  | 12.8  |   |
| 4742 | Dido1          | 1.12 | 304 | 10.51 | 466  | 11.82 |   |
| 4743 | Myrf           | 1.12 | 146 | 9.1   | 211  | 10.23 |   |
| 4744 | C1s            | 1.12 | 567 | 76.81 | 815  | 86.31 |   |
| 4745 | Irak1          | 1.12 | 247 | 26.06 | 385  | 29.27 |   |
| 4746 | Sf1            | 1.12 | 530 | 48.29 | 798  | 54.23 |   |
| 4747 | Adam10         | 1.12 | 306 | 28.03 | 477  | 31.47 |   |
| 4748 | Cnot1          | 1.12 | 776 | 32.86 | 1167 | 36.88 |   |
| 4749 | 1500009L16Rik  | 1.12 | 5   | 1.42  | 6    | 1.59  |   |
| 4750 | AABR07001929.1 | 1.12 | 9   | 0.87  | 8    | 0.97  |   |
| 4751 | AABR07006866.1 | 1.12 | 4   | 1.74  | 5    | 1.95  |   |
| 4752 | AABR07014974.1 | 1.12 | 2   | 2.28  | 3    | 2.55  |   |
| 4753 | AABR07019306.1 | 1.12 | 1   | 0.56  | 2    | 0.62  |   |
| 4754 | AABR07042915.1 | 1.12 | 0   | 1.74  | 0    | 1.95  |   |
| 4755 | AABR07071701.1 | 1.12 | 3   | 3.18  | 5    | 3.56  |   |
| 4756 | Actl7a         | 1.12 | 2   | 0.46  | 3    | 0.51  |   |
| 4757 | Adamts20       | 1.12 | 2   | 0.13  | 7    | 0.14  |   |
| 4758 | Aig1           | 1.12 | 13  | 0.51  | 17   | 0.57  |   |
| 4759 | Ankrd23        | 1.12 | 2   | 0.55  | 3    | 0.62  |   |
| 4760 | Atp1a4         | 1.12 | 5   | 0.21  | 7    | 0.24  |   |
| 4761 | AY172581.3     | 1.12 | 16  | 85.19 | 24   | 95.54 |   |
| 4762 | Baalc          | 1.12 | 5   | 0.24  | 5    | 0.27  |   |
| 4763 | Begain         | 1.12 | 2   | 0.26  | 4    | 0.29  |   |
| 4764 | Cbr1_1         | 1.12 | 0   | 1.12  | 0    | 1.25  |   |
| 4765 | Ccdc116        | 1.12 | 5   | 0.74  | 6    | 0.83  |   |
| 4766 | Cdh12          | 1.12 | 13  | 0.1   | 16   | 0.12  |   |
| 4767 | Cdh17          | 1.12 | 3   | 0.2   | 6    | 0.23  |   |
| 4768 | Chek2          | 1.12 | 37  | 3.18  | 46   | 3.57  |   |
| 4769 | Chmp7          | 1.12 | 95  | 13.11 | 147  | 14.71 |   |
| 4770 | Chn3           | 1.12 | 2   | 0.6   | 3    | 0.68  |   |
| 4771 | Ciao1          | 1.12 | 48  | 9.29  | 72   | 10.42 |   |
| 4772 | Cmbl           | 1.12 | 9   | 0.64  | 11   | 0.72  |   |
| 4773 | Cox10          | 1.12 | 47  | 3.01  | 88   | 3.38  |   |
| 4774 | Dynlrb1        | 1.12 | 184 | 79.24 | 293  | 88.86 |   |
| 4775 | Ece2           | 1.12 | 7   | 0.39  | 11   | 0.43  |   |
| 4776 | Fam115c_1      | 1.12 | 2   | 1.65  | 2    | 1.85  |   |
| 4777 | Gm5611         | 1.12 | 1   | 0.99  | 1    | 1.11  |   |
| 4778 | Gm5s           | 1.12 | 54  | 1.98  | 89   | 2.22  |   |
| 4779 | Gnas_1         | 1.12 | 2   | 0.88  | 3    | 0.99  |   |
| 4780 | Got111         | 1.12 | 7   | 0.51  | 14   | 0.57  |   |
| 4781 | Hey2           | 1.12 | 14  | 1.9   | 21   | 2.13  |   |
| 4782 | Hfm1           | 1.12 | 8   | 0.17  | 6    | 0.19  |   |
| 4783 | Hilpda         | 1.12 | 9   | 14.2  | 15   | 15.92 |   |
| 4784 | Hs6st3         | 1.12 | 2   | 1.01  | 3    | 1.14  |   |
| 4785 | Irf6           | 1.12 | 11  | 0.9   | 15   | 1     |   |
| 4786 | Isg20          | 1.12 | 6   | 0.83  | 6    | 0.93  |   |
| 4787 | Krt222         | 1.12 | 4   | 0.23  | 5    | 0.25  |   |
| 4788 | LOC100360446   | 1.12 | 4   | 1.43  | 6    | 1.6   |   |
| 4789 | LOC100361476   | 1.12 | 1   | 0.51  | 0    | 0.57  |   |
| 4790 | LOC100362338   | 1.12 | 0   | 6.52  | 0    | 7.32  |   |
| 4791 | LOC100911807   | 1.12 | 0   | 0.44  | 0    | 0.49  |   |
| 4792 | LOC365839      | 1.12 | 1   | 0.59  | 2    | 0.66  |   |
| 4793 | LOC500034      | 1.12 | 42  | 8.29  | 71   | 9.29  |   |

Supplemental Table 3  
 FSH + Ad-E versus FSH + Ad-FOXO1(A3), 24 hours

|      | A              | B    | C   | D     | E   | F     | G |
|------|----------------|------|-----|-------|-----|-------|---|
| 4794 | LOC679087      | 1.12 | 4   | 2.72  | 8   | 3.05  |   |
| 4795 | LOC684238      | 1.12 | 11  | 0.21  | 6   | 0.24  |   |
| 4796 | Magoh          | 1.12 | 55  | 27.02 | 85  | 30.3  |   |
| 4797 | Mia            | 1.12 | 2   | 1.27  | 3   | 1.42  |   |
| 4798 | Negr1          | 1.12 | 28  | 0.42  | 28  | 0.47  |   |
| 4799 | Nfe2l3_2       | 1.12 | 8   | 1.49  | 12  | 1.67  |   |
| 4800 | Nfrkb          | 1.12 | 224 | 12.53 | 348 | 14.05 |   |
| 4801 | Nkpd1          | 1.12 | 2   | 0.29  | 4   | 0.33  |   |
| 4802 | Nlrp9          | 1.12 | 3   | 0.24  | 5   | 0.27  |   |
| 4803 | Nmb            | 1.12 | 2   | 0.51  | 4   | 0.57  |   |
| 4804 | Nme6           | 1.12 | 35  | 5.78  | 47  | 6.48  |   |
| 4805 | Nxpe4_1        | 1.12 | 2   | 0.47  | 3   | 0.53  |   |
| 4806 | Opn3           | 1.12 | 74  | 2.07  | 151 | 2.32  |   |
| 4807 | Osgpl1         | 1.12 | 42  | 4.43  | 70  | 4.96  |   |
| 4808 | P2ry1          | 1.12 | 2   | 0.23  | 4   | 0.26  |   |
| 4809 | Pdgfrl         | 1.12 | 7   | 0.49  | 4   | 0.55  |   |
| 4810 | Perp           | 1.12 | 3   | 0.39  | 4   | 0.43  |   |
| 4811 | Poli           | 1.12 | 11  | 1.43  | 22  | 1.6   |   |
| 4812 | Polr2i         | 1.12 | 0   | 5.75  | 0   | 6.45  |   |
| 4813 | Prkar1b        | 1.12 | 7   | 0.67  | 11  | 0.75  |   |
| 4814 | R3hcc1l        | 1.12 | 53  | 3.36  | 79  | 3.77  |   |
| 4815 | Rcan2          | 1.12 | 82  | 6.39  | 158 | 7.17  |   |
| 4816 | RGD1306941     | 1.12 | 20  | 1.95  | 26  | 2.19  |   |
| 4817 | RGD1359158     | 1.12 | 43  | 5.37  | 64  | 6.02  |   |
| 4818 | RGD1564534     | 1.12 | 2   | 0.29  | 3   | 0.33  |   |
| 4819 | Rnaseh2b       | 1.12 | 45  | 6.63  | 57  | 7.43  |   |
| 4820 | Rtkn           | 1.12 | 0   | 0.28  | 0   | 0.32  |   |
| 4821 | Sfn            | 1.12 | 1   | 0.97  | 1   | 1.09  |   |
| 4822 | Slc2a6         | 1.12 | 1   | 0.34  | 2   | 0.38  |   |
| 4823 | Slc45a3        | 1.12 | 2   | 0.22  | 6   | 0.25  |   |
| 4824 | Slc6a16        | 1.12 | 10  | 0.33  | 10  | 0.37  |   |
| 4825 | Sncaip         | 1.12 | 8   | 0.35  | 10  | 0.39  |   |
| 4826 | SNORD42_1      | 1.12 | 0   | 44.56 | 0   | 49.97 |   |
| 4827 | SNORD42_2      | 1.12 | 0   | 10.49 | 0   | 11.77 |   |
| 4828 | SNORD48        | 1.12 | 0   | 33.94 | 0   | 38.07 |   |
| 4829 | SNORD88_4      | 1.12 | 0   | 24.14 | 0   | 27.07 |   |
| 4830 | snoU54         | 1.12 | 0   | 10.65 | 0   | 11.94 |   |
| 4831 | Snrpb2         | 1.12 | 73  | 22.5  | 106 | 25.23 |   |
| 4832 | Spsb2_2        | 1.12 | 0   | 1.17  | 0   | 1.31  |   |
| 4833 | Syn1           | 1.12 | 114 | 0.46  | 114 | 0.51  |   |
| 4834 | Tbc1d4         | 1.12 | 40  | 1.84  | 63  | 2.07  |   |
| 4835 | Tdrd5          | 1.12 | 3   | 0.21  | 7   | 0.23  |   |
| 4836 | Tifa           | 1.12 | 14  | 1.63  | 16  | 1.82  |   |
| 4837 | Tk2            | 1.12 | 63  | 7.58  | 109 | 8.5   |   |
| 4838 | Tox3           | 1.12 | 6   | 0.23  | 5   | 0.26  |   |
| 4839 | Trim32         | 1.12 | 0   | 0.46  | 0   | 0.51  |   |
| 4840 | Ttc16          | 1.12 | 5   | 0.54  | 20  | 0.6   |   |
| 4841 | Ttll13         | 1.12 | 64  | 0.86  | 118 | 0.96  |   |
| 4842 | Vwf            | 1.12 | 15  | 0.41  | 18  | 0.46  |   |
| 4843 | Wdr31          | 1.12 | 17  | 2.48  | 26  | 2.78  |   |
| 4844 | Zbtb6          | 1.12 | 42  | 6.31  | 63  | 7.08  |   |
| 4845 | Zcchc7         | 1.12 | 230 | 7.99  | 384 | 8.96  |   |
| 4846 | 4930452B06Rik  | 1.12 | 15  | 0.67  | 40  | 0.76  |   |
| 4847 | AABR07002774.2 | 1.12 | 11  | 2.94  | 22  | 3.3   |   |

Supplemental Table 3  
 FSH + Ad-E versus FSH + Ad-FOXO1(A3), 24 hours

|      | A              | B    | C   | D     | E   | F     | G |
|------|----------------|------|-----|-------|-----|-------|---|
| 4848 | AABR07028908.2 | 1.12 | 5   | 0.44  | 9   | 0.5   |   |
| 4849 | AABR07035375.1 | 1.12 | 0   | 0.49  | 0   | 0.54  |   |
| 4850 | AABR07051400.1 | 1.12 | 37  | 11.25 | 53  | 12.61 |   |
| 4851 | AABR07058287.1 | 1.12 | 0   | 0.31  | 1   | 0.35  |   |
| 4852 | AABR07059879.1 | 1.12 | 0   | 1.46  | 0   | 1.64  |   |
| 4853 | AABR07064257.1 | 1.12 | 2   | 0.13  | 1   | 0.15  |   |
| 4854 | AABR07071395.1 | 1.12 | 4   | 0.75  | 6   | 0.84  |   |
| 4855 | Abhd5          | 1.12 | 53  | 5.73  | 76  | 6.43  |   |
| 4856 | AC091336.1     | 1.12 | 0   | 0.74  | 1   | 0.83  |   |
| 4857 | AC129162.1     | 1.12 | 27  | 2.67  | 21  | 2.99  |   |
| 4858 | AC130391.3     | 1.12 | 6   | 3.93  | 10  | 4.41  |   |
| 4859 | Ada            | 1.12 | 14  | 1.04  | 45  | 1.17  |   |
| 4860 | Ap5s1          | 1.12 | 12  | 2.05  | 21  | 2.3   |   |
| 4861 | Apeg3          | 1.12 | 0   | 0.78  | 0   | 0.87  |   |
| 4862 | Apoo           | 1.12 | 22  | 4.65  | 39  | 5.21  |   |
| 4863 | Arsg           | 1.12 | 32  | 0.73  | 21  | 0.82  |   |
| 4864 | Atp10b         | 1.12 | 108 | 0.1   | 174 | 0.11  |   |
| 4865 | Brsk1          | 1.12 | 64  | 6.5   | 99  | 7.29  |   |
| 4866 | Camk1g         | 1.12 | 3   | 0.3   | 3   | 0.34  |   |
| 4867 | Cd274          | 1.12 | 3   | 0.37  | 7   | 0.42  |   |
| 4868 | Cenpu          | 1.12 | 21  | 0.88  | 23  | 0.98  |   |
| 4869 | Chd5           | 1.12 | 3   | 0.1   | 6   | 0.11  |   |
| 4870 | Ciart          | 1.12 | 6   | 0.83  | 6   | 0.94  |   |
| 4871 | Cldn10         | 1.12 | 6   | 0.52  | 10  | 0.59  |   |
| 4872 | Cntn2          | 1.12 | 4   | 0.14  | 7   | 0.16  |   |
| 4873 | Copg2          | 1.12 | 180 | 19.95 | 265 | 22.38 |   |
| 4874 | Coro6          | 1.12 | 2   | 0.28  | 3   | 0.32  |   |
| 4875 | Cox6c          | 1.12 | 107 | 79.2  | 162 | 88.82 |   |
| 4876 | Cpeb1          | 1.12 | 11  | 0.45  | 7   | 0.5   |   |
| 4877 | Cyp27b1        | 1.12 | 2   | 0.3   | 4   | 0.33  |   |
| 4878 | Dars2          | 1.12 | 41  | 4.76  | 60  | 5.34  |   |
| 4879 | Dclre1a        | 1.12 | 63  | 3.43  | 85  | 3.84  |   |
| 4880 | Dlgap5         | 1.12 | 38  | 3.97  | 52  | 4.45  |   |
| 4881 | Dnah17         | 1.12 | 8   | 0.05  | 8   | 0.06  |   |
| 4882 | Dnajc2         | 1.12 | 57  | 6.51  | 84  | 7.31  |   |
| 4883 | Dyrk3          | 1.12 | 3   | 0.29  | 4   | 0.33  |   |
| 4884 | Ect2l          | 1.12 | 27  | 0.28  | 28  | 0.32  |   |
| 4885 | Epha5          | 1.12 | 14  | 0.09  | 15  | 0.1   |   |
| 4886 | Fam199x        | 1.12 | 18  | 4.99  | 27  | 5.6   |   |
| 4887 | Fam83b         | 1.12 | 9   | 0.22  | 8   | 0.25  |   |
| 4888 | Fbxl18         | 1.12 | 36  | 1.74  | 45  | 1.95  |   |
| 4889 | Fer1l5         | 1.12 | 5   | 0.11  | 19  | 0.13  |   |
| 4890 | Gapdhs         | 1.12 | 14  | 0.47  | 12  | 0.52  |   |
| 4891 | Gjc1           | 1.12 | 31  | 4.09  | 52  | 4.59  |   |
| 4892 | Gnl3           | 1.12 | 86  | 13.42 | 139 | 15.05 |   |
| 4893 | Gtpbp10        | 1.12 | 21  | 3.07  | 36  | 3.44  |   |
| 4894 | Hhat           | 1.12 | 23  | 1.47  | 34  | 1.65  |   |
| 4895 | Ifi47          | 1.12 | 6   | 1.16  | 9   | 1.3   |   |
| 4896 | Kdm4d_1        | 1.12 | 4   | 0.62  | 5   | 0.7   |   |
| 4897 | Kif21b         | 1.12 | 3   | 0.13  | 3   | 0.15  |   |
| 4898 | L2hgdh         | 1.12 | 12  | 1.11  | 20  | 1.24  |   |
| 4899 | Lmbrd1         | 1.12 | 111 | 10.8  | 168 | 12.11 |   |
| 4900 | LOC685596      | 1.12 | 0   | 3.05  | 0   | 3.42  |   |
| 4901 | LOC687780      | 1.12 | 0   | 1.8   | 0   | 2.02  |   |

Supplemental Table 3  
 FSH + Ad-E versus FSH + Ad-FOXO1(A3), 24 hours

|      | A             | B    | C   | D     | E   | F     | G |
|------|---------------|------|-----|-------|-----|-------|---|
| 4902 | LOC690806     | 1.12 | 9   | 5.42  | 13  | 6.08  |   |
| 4903 | Lym5          | 1.12 | 2   | 2.77  | 3   | 3.11  |   |
| 4904 | March7        | 1.12 | 202 | 17.86 | 331 | 20.03 |   |
| 4905 | Mknk1         | 1.12 | 143 | 13.7  | 219 | 15.37 |   |
| 4906 | Mmrn2         | 1.12 | 4   | 0.18  | 4   | 0.2   |   |
| 4907 | Mos           | 1.12 | 2   | 0.71  | 3   | 0.79  |   |
| 4908 | Mplkip        | 1.12 | 43  | 5.39  | 59  | 6.04  |   |
| 4909 | Mrpl41        | 1.12 | 21  | 13.35 | 30  | 14.97 |   |
| 4910 | Mrpl47        | 1.12 | 19  | 2.99  | 29  | 3.36  |   |
| 4911 | Mrps28        | 1.12 | 66  | 9.22  | 105 | 10.34 |   |
| 4912 | Mterfd3       | 1.12 | 14  | 0.45  | 13  | 0.5   |   |
| 4913 | Mtfp1         | 1.12 | 4   | 1.06  | 7   | 1.19  |   |
| 4914 | Ndnf          | 1.12 | 2   | 0.38  | 3   | 0.43  |   |
| 4915 | Nkain1        | 1.12 | 9   | 2.58  | 16  | 2.9   |   |
| 4916 | Osbpl1a       | 1.12 | 158 | 10.96 | 235 | 12.29 |   |
| 4917 | Pacrgl        | 1.12 | 13  | 1.32  | 17  | 1.48  |   |
| 4918 | Pafah1b3      | 1.12 | 52  | 17.93 | 85  | 20.11 |   |
| 4919 | Pcdhga2       | 1.12 | 9   | 1.19  | 13  | 1.34  |   |
| 4920 | Pde3b         | 1.12 | 20  | 0.16  | 18  | 0.19  |   |
| 4921 | Pigl          | 1.12 | 52  | 1.83  | 56  | 2.05  |   |
| 4922 | Plekha1       | 1.12 | 98  | 6.7   | 158 | 7.52  |   |
| 4923 | Ppfia2        | 1.12 | 15  | 0.21  | 20  | 0.24  |   |
| 4924 | Psmc3ip       | 1.12 | 14  | 4.76  | 23  | 5.34  |   |
| 4925 | Ptpn7         | 1.12 | 3   | 0.16  | 3   | 0.18  |   |
| 4926 | Rapgef1       | 1.12 | 6   | 0.94  | 9   | 1.06  |   |
| 4927 | Rbbp8nl       | 1.12 | 5   | 0.14  | 8   | 0.16  |   |
| 4928 | Reep1         | 1.12 | 17  | 0.98  | 26  | 1.1   |   |
| 4929 | RGD1564664    | 1.12 | 2   | 0.52  | 3   | 0.58  |   |
| 4930 | RGD1565844    | 1.12 | 2   | 1.14  | 3   | 1.28  |   |
| 4931 | RGD1565862    | 1.12 | 95  | 1.44  | 78  | 1.62  |   |
| 4932 | Rn60_2_2049.3 | 1.12 | 2   | 0.89  | 3   | 0.99  |   |
| 4933 | Rnf121        | 1.12 | 52  | 5.46  | 78  | 6.13  |   |
| 4934 | Serpini1      | 1.12 | 15  | 1.16  | 22  | 1.3   |   |
| 4935 | Sft2d3        | 1.12 | 16  | 2.63  | 24  | 2.95  |   |
| 4936 | Sh3gl2        | 1.12 | 6   | 0.49  | 14  | 0.54  |   |
| 4937 | Slc25a40      | 1.12 | 33  | 1.29  | 49  | 1.45  |   |
| 4938 | Slc35d1       | 1.12 | 67  | 5.23  | 114 | 5.87  |   |
| 4939 | Slc43a3       | 1.12 | 4   | 0.53  | 9   | 0.59  |   |
| 4940 | SNORD12_1     | 1.12 | 0   | 7.87  | 0   | 8.83  |   |
| 4941 | Spon1         | 1.12 | 32  | 0.7   | 35  | 0.78  |   |
| 4942 | Ssc5d         | 1.12 | 11  | 0.48  | 17  | 0.54  |   |
| 4943 | St8sia2       | 1.12 | 10  | 1.92  | 13  | 2.16  |   |
| 4944 | Timm10b_2     | 1.12 | 1   | 0.96  | 1   | 1.08  |   |
| 4945 | Tmem151b      | 1.12 | 8   | 0.86  | 13  | 0.96  |   |
| 4946 | Txlng         | 1.12 | 73  | 3.57  | 117 | 4     |   |
| 4947 | Zfp316        | 1.12 | 18  | 1.9   | 27  | 2.13  |   |
| 4948 | Zfp334        | 1.12 | 16  | 2.84  | 24  | 3.18  |   |
| 4949 | Zfp353        | 1.12 | 4   | 0.91  | 6   | 1.02  |   |
| 4950 | RGD1310587    | 1.12 | 4   | 0.53  | 6   | 0.6   |   |
| 4951 | Eif2s3        | 1.12 | 354 | 27.56 | 535 | 30.87 |   |
| 4952 | Wasl          | 1.12 | 278 | 17.38 | 418 | 19.45 |   |
| 4953 | Hbp1          | 1.12 | 481 | 48.04 | 670 | 53.77 |   |
| 4954 | Dhx9          | 1.12 | 534 | 44.52 | 827 | 49.83 |   |
| 4955 | Zfx           | 1.12 | 219 | 9.15  | 317 | 10.24 |   |

Supplemental Table 3  
 FSH + Ad-E versus FSH + Ad-FOXO1(A3), 24 hours

|      | A          | B    | C    | D       | E    | F      | G |
|------|------------|------|------|---------|------|--------|---|
| 4956 | Srpk2      | 1.12 | 235  | 16.48   | 342  | 18.44  |   |
| 4957 | Phf12      | 1.12 | 208  | 11.67   | 292  | 13.06  |   |
| 4958 | Ube2n      | 1.12 | 140  | 32.38   | 218  | 36.23  |   |
| 4959 | Large      | 1.12 | 188  | 10.96   | 318  | 12.26  |   |
| 4960 | Grpel1     | 1.12 | 119  | 37.6    | 179  | 42.04  |   |
| 4961 | Ar         | 1.12 | 155  | 9.3     | 267  | 10.4   |   |
| 4962 | Snx27      | 1.12 | 212  | 11.01   | 344  | 12.3   |   |
| 4963 | Arhgef6    | 1.12 | 140  | 11.57   | 201  | 12.92  |   |
| 4964 | Rgma       | 1.12 | 107  | 9.47    | 160  | 10.59  |   |
| 4965 | Lyst       | 1.12 | 113  | 3.46    | 177  | 3.86   |   |
| 4966 | Atr        | 1.12 | 123  | 3.51    | 171  | 3.92   |   |
| 4967 | Fbxw2      | 1.12 | 166  | 15.95   | 266  | 17.82  |   |
| 4968 | Kpna4      | 1.12 | 181  | 29.45   | 296  | 32.9   |   |
| 4969 | Rap1gds1   | 1.12 | 305  | 23.8    | 474  | 26.58  |   |
| 4970 | Snrnp40    | 1.12 | 114  | 16.43   | 162  | 18.34  |   |
| 4971 | Erap1      | 1.12 | 303  | 21.3    | 467  | 23.78  |   |
| 4972 | Fbf1       | 1.12 | 104  | 5.93    | 150  | 6.62   |   |
| 4973 | Ralgapb    | 1.12 | 390  | 15.85   | 579  | 17.69  |   |
| 4974 | Pten       | 1.12 | 187  | 31.14   | 312  | 34.75  |   |
| 4975 | Synj1      | 1.12 | 199  | 7.34    | 271  | 8.19   |   |
| 4976 | Mbtd1      | 1.12 | 177  | 9.52    | 265  | 10.62  |   |
| 4977 | Rab5b      | 1.12 | 358  | 36.43   | 541  | 40.65  |   |
| 4978 | Crot       | 1.12 | 94   | 8.57    | 137  | 9.57   |   |
| 4979 | Msi2       | 1.12 | 502  | 23.92   | 507  | 26.68  |   |
| 4980 | Ylpm1      | 1.12 | 380  | 12.91   | 532  | 14.4   |   |
| 4981 | Smarcad1   | 1.12 | 176  | 9.36    | 261  | 10.44  |   |
| 4982 | RGD1564887 | 1.12 | 83   | 6.68    | 123  | 7.45   |   |
| 4983 | Snapin     | 1.12 | 128  | 28.02   | 186  | 31.24  |   |
| 4984 | Il6st      | 1.11 | 277  | 31.76   | 428  | 35.4   |   |
| 4985 | Adrm1      | 1.11 | 113  | 26.63   | 174  | 29.68  |   |
| 4986 | Nemf       | 1.11 | 76   | 7.87    | 102  | 8.77   |   |
| 4987 | Trappc8    | 1.11 | 189  | 10.6    | 293  | 11.81  |   |
| 4988 | AC111257.1 | 1.11 | 15   | 5.22    | 23   | 5.81   |   |
| 4989 | Eef1e1     | 1.11 | 51   | 7.32    | 78   | 8.15   |   |
| 4990 | Snx2       | 1.11 | 123  | 17.09   | 189  | 19.03  |   |
| 4991 | Cox5b      | 1.11 | 118  | 106.97  | 203  | 119.13 |   |
| 4992 | B3galnt2   | 1.11 | 75   | 4.11    | 116  | 4.58   |   |
| 4993 | Chp1       | 1.11 | 154  | 26.89   | 224  | 29.94  |   |
| 4994 | Aqr        | 1.11 | 293  | 19.92   | 441  | 22.18  |   |
| 4995 | Dopey2     | 1.11 | 124  | 4.48    | 188  | 4.99   |   |
| 4996 | Msantd3    | 1.11 | 60   | 4.58    | 84   | 5.1    |   |
| 4997 | Snrk       | 1.11 | 133  | 10.46   | 195  | 11.64  |   |
| 4998 | Kdm5c      | 1.11 | 387  | 20.22   | 578  | 22.5   |   |
| 4999 | Usp37      | 1.11 | 164  | 6.3     | 234  | 7.01   |   |
| 5000 | Gatad1     | 1.11 | 53   | 19.58   | 79   | 21.79  |   |
| 5001 | Mysm1      | 1.11 | 87   | 6.12    | 135  | 6.8    |   |
| 5002 | Zfp367     | 1.11 | 51   | 4.46    | 83   | 4.96   |   |
| 5003 | Plekho2    | 1.11 | 57   | 8.73    | 83   | 9.72   |   |
| 5004 | Slc30a4    | 1.11 | 133  | 8.5     | 200  | 9.46   |   |
| 5005 | Mt-atp6    | 1.11 | 5723 | 3076.79 | 8573 | 3423.2 |   |
| 5006 | Mfn1       | 1.11 | 256  | 17.7    | 421  | 19.69  |   |
| 5007 | Hexa       | 1.11 | 315  | 59.74   | 471  | 66.46  |   |
| 5008 | Cdc3711    | 1.11 | 123  | 6.78    | 173  | 7.55   |   |
| 5009 | Sec62      | 1.11 | 218  | 33.46   | 330  | 37.22  |   |

Supplemental Table 3  
 FSH + Ad-E versus FSH + Ad-FOXO1(A3), 24 hours

|      | A              | B    | C   | D      | E    | F      | G |
|------|----------------|------|-----|--------|------|--------|---|
| 5010 | Cul9           | 1.11 | 163 | 5.72   | 218  | 6.37   |   |
| 5011 | Edem2          | 1.11 | 111 | 15.76  | 151  | 17.53  |   |
| 5012 | LOC100364748   | 1.11 | 73  | 11.69  | 101  | 13     |   |
| 5013 | G3bp2          | 1.11 | 199 | 31.4   | 288  | 34.92  |   |
| 5014 | Inpp5e         | 1.11 | 102 | 8.67   | 141  | 9.64   |   |
| 5015 | Dnmbp          | 1.11 | 98  | 4.77   | 148  | 5.3    |   |
| 5016 | LOC100910046   | 1.11 | 57  | 4.82   | 93   | 5.36   |   |
| 5017 | Arpc5          | 1.11 | 201 | 40.75  | 306  | 45.32  |   |
| 5018 | Ccdc77         | 1.11 | 64  | 5.8    | 82   | 6.45   |   |
| 5019 | Ccdc90b        | 1.11 | 50  | 9.99   | 68   | 11.11  |   |
| 5020 | Lars2          | 1.11 | 73  | 4.52   | 120  | 5.03   |   |
| 5021 | Dld            | 1.11 | 171 | 20.81  | 267  | 23.13  |   |
| 5022 | Armcx2         | 1.11 | 334 | 36.59  | 498  | 40.67  |   |
| 5023 | Gmpr2          | 1.11 | 58  | 5.33   | 84   | 5.92   |   |
| 5024 | Mesdc2         | 1.11 | 337 | 60.53  | 501  | 67.27  |   |
| 5025 | Lamp1          | 1.11 | 819 | 146.57 | 1215 | 162.88 |   |
| 5026 | Mapk7          | 1.11 | 5   | 4.86   | 5    | 5.4    |   |
| 5027 | Rerg           | 1.11 | 133 | 11.96  | 189  | 13.29  |   |
| 5028 | Klhdc4_1       | 1.11 | 34  | 10.53  | 51   | 11.7   |   |
| 5029 | Magi1          | 1.11 | 85  | 2.64   | 128  | 2.94   |   |
| 5030 | Mill1          | 1.11 | 236 | 18.32  | 362  | 20.35  |   |
| 5031 | Ppp1r2         | 1.11 | 150 | 25.24  | 222  | 28.03  |   |
| 5032 | Herc3          | 1.11 | 110 | 4.71   | 172  | 5.23   |   |
| 5033 | Umps           | 1.11 | 71  | 14.6   | 106  | 16.22  |   |
| 5034 | AABR07016056.1 | 1.11 | 12  | 19.9   | 18   | 22.09  |   |
| 5035 | Ppfia1         | 1.11 | 155 | 11.57  | 238  | 12.85  |   |
| 5036 | Parp9          | 1.11 | 290 | 26.31  | 439  | 29.2   |   |
| 5037 | Rap1b          | 1.11 | 64  | 41.75  | 93   | 46.33  |   |
| 5038 | St13           | 1.11 | 104 | 55.33  | 119  | 61.4   |   |
| 5039 | Usp40          | 1.11 | 128 | 12.67  | 183  | 14.06  |   |
| 5040 | Cuedc2         | 1.11 | 42  | 7.42   | 67   | 8.24   |   |
| 5041 | Mblac2         | 1.11 | 58  | 2.75   | 66   | 3.05   |   |
| 5042 | Prkaa2         | 1.11 | 48  | 4.23   | 73   | 4.7    |   |
| 5043 | Sumf1          | 1.11 | 107 | 13.49  | 162  | 14.96  |   |
| 5044 | Zhx2           | 1.11 | 54  | 3.93   | 82   | 4.36   |   |
| 5045 | LOC690035      | 1.11 | 26  | 2.47   | 44   | 2.74   |   |
| 5046 | Smek1          | 1.11 | 232 | 19.58  | 339  | 21.72  |   |
| 5047 | Ppp1r3c        | 1.11 | 60  | 7.84   | 90   | 8.69   |   |
| 5048 | Brd4           | 1.11 | 635 | 27.55  | 999  | 30.55  |   |
| 5049 | Trim39         | 1.11 | 79  | 4.29   | 102  | 4.76   |   |
| 5050 | Unk            | 1.11 | 91  | 8.08   | 146  | 8.97   |   |
| 5051 | Nckap5l        | 1.11 | 95  | 6.75   | 144  | 7.49   |   |
| 5052 | Hbs1l          | 1.11 | 174 | 15.86  | 278  | 17.58  |   |
| 5053 | Kat7           | 1.11 | 246 | 24.98  | 371  | 27.69  |   |
| 5054 | Atf5           | 1.11 | 32  | 10.19  | 49   | 11.3   |   |
| 5055 | Eri2           | 1.11 | 29  | 3.04   | 42   | 3.37   |   |
| 5056 | Klf9           | 1.11 | 77  | 8.37   | 118  | 9.28   |   |
| 5057 | Zfp346         | 1.11 | 175 | 8.4    | 260  | 9.31   |   |
| 5058 | Cenpb          | 1.11 | 174 | 30.9   | 257  | 34.25  |   |
| 5059 | LOC100911537   | 1.11 | 165 | 7.47   | 279  | 8.28   |   |
| 5060 | Samd11         | 1.11 | 178 | 30.66  | 285  | 33.98  |   |
| 5061 | Max            | 1.11 | 125 | 20.39  | 190  | 22.59  |   |
| 5062 | Smad2          | 1.11 | 171 | 13.97  | 273  | 15.48  |   |
| 5063 | Ahdc1          | 1.11 | 127 | 4.94   | 194  | 5.48   |   |

Supplemental Table 3  
 FSH + Ad-E versus FSH + Ad-FOXO1(A3), 24 hours

|      | A         | B    | C   | D      | E   | F      | G |
|------|-----------|------|-----|--------|-----|--------|---|
| 5064 | Usp19     | 1.11 | 373 | 27.11  | 549 | 30.03  |   |
| 5065 | Bloc1s2   | 1.11 | 36  | 9.64   | 51  | 10.68  |   |
| 5066 | Mafk      | 1.11 | 86  | 11.09  | 138 | 12.28  |   |
| 5067 | Zbtb48    | 1.11 | 34  | 4.41   | 50  | 4.88   |   |
| 5068 | Dhx32     | 1.11 | 63  | 6.12   | 82  | 6.78   |   |
| 5069 | Zfp410    | 1.11 | 196 | 17.8   | 284 | 19.72  |   |
| 5070 | Drosha    | 1.11 | 243 | 16.98  | 362 | 18.8   |   |
| 5071 | Cd164     | 1.11 | 500 | 62.36  | 747 | 69.04  |   |
| 5072 | Map2k7    | 1.11 | 119 | 28.79  | 177 | 31.87  |   |
| 5073 | Rad17     | 1.11 | 68  | 6.81   | 111 | 7.54   |   |
| 5074 | Naa30     | 1.11 | 110 | 6.18   | 153 | 6.84   |   |
| 5075 | Plrg1     | 1.11 | 83  | 15.64  | 127 | 17.32  |   |
| 5076 | Rap2c     | 1.11 | 85  | 8.8    | 124 | 9.74   |   |
| 5077 | Bcap29    | 1.11 | 58  | 10.55  | 92  | 11.67  |   |
| 5078 | Ccdc14    | 1.11 | 44  | 1.83   | 65  | 2.03   |   |
| 5079 | Cluap1    | 1.11 | 83  | 9.14   | 121 | 10.11  |   |
| 5080 | Cpne2     | 1.11 | 30  | 5.27   | 51  | 5.84   |   |
| 5081 | LOC680039 | 1.11 | 18  | 1.35   | 26  | 1.49   |   |
| 5082 | Rnf139    | 1.11 | 58  | 6.65   | 84  | 7.36   |   |
| 5083 | Slc16a13  | 1.11 | 32  | 4.76   | 44  | 5.26   |   |
| 5084 | Zfp639    | 1.11 | 56  | 12.42  | 83  | 13.74  |   |
| 5085 | Hic2      | 1.11 | 28  | 2      | 52  | 2.22   |   |
| 5086 | Trpm4     | 1.11 | 27  | 1.86   | 46  | 2.06   |   |
| 5087 | Ptms      | 1.11 | 351 | 118.25 | 535 | 130.82 |   |
| 5088 | Rbsn      | 1.11 | 168 | 10.63  | 238 | 11.76  |   |
| 5089 | Braf      | 1.11 | 182 | 11.18  | 309 | 12.36  |   |
| 5090 | Slc15a4   | 1.11 | 81  | 9.68   | 116 | 10.71  |   |
| 5091 | Vamp3     | 1.11 | 188 | 35.31  | 302 | 39.05  |   |
| 5092 | Cc2d2a    | 1.11 | 154 | 7.1    | 219 | 7.85   |   |
| 5093 | Fam160a1  | 1.11 | 87  | 8.76   | 129 | 9.69   |   |
| 5094 | Lin54     | 1.11 | 63  | 4.03   | 93  | 4.46   |   |
| 5095 | Uhrf2     | 1.11 | 255 | 14.58  | 402 | 16.12  |   |
| 5096 | Cyth2     | 1.11 | 155 | 32.58  | 235 | 36.02  |   |
| 5097 | Msl3      | 1.11 | 117 | 15.17  | 173 | 16.77  |   |
| 5098 | Rcc2      | 1.11 | 146 | 39.48  | 234 | 43.64  |   |
| 5099 | Rab22a    | 1.11 | 186 | 8.39   | 304 | 9.27   |   |
| 5100 | Clasp1    | 1.11 | 358 | 17.34  | 509 | 19.17  |   |
| 5101 | Ndufaf5   | 1.11 | 36  | 7.28   | 57  | 8.05   |   |
| 5102 | Zfp846    | 1.11 | 39  | 5.07   | 58  | 5.6    |   |
| 5103 | Abcd2     | 1.11 | 44  | 1.51   | 55  | 1.67   |   |
| 5104 | Col1a2    | 1.11 | 0   | 1.86   | 0   | 2.06   |   |
| 5105 | Dhfr      | 1.11 | 52  | 3.56   | 75  | 3.93   |   |
| 5106 | Fkbp8     | 1.11 | 299 | 60.53  | 465 | 66.89  |   |
| 5107 | Nsun5     | 1.11 | 26  | 5.3    | 39  | 5.85   |   |
| 5108 | Unc79     | 1.11 | 37  | 1.1    | 49  | 1.21   |   |
| 5109 | Thrap3    | 1.11 | 653 | 55.72  | 967 | 61.57  |   |
| 5110 | Ino80d    | 1.1  | 131 | 9.35   | 185 | 10.33  |   |
| 5111 | Lmbrd2    | 1.1  | 70  | 6.81   | 112 | 7.53   |   |
| 5112 | Coa5      | 1.1  | 137 | 16.47  | 199 | 18.19  |   |
| 5113 | Snx7      | 1.1  | 53  | 9.09   | 84  | 10.04  |   |
| 5114 | Dnajc7    | 1.1  | 283 | 35.21  | 413 | 38.88  |   |
| 5115 | Maf1      | 1.1  | 184 | 38.79  | 274 | 42.84  |   |
| 5116 | Kif16b    | 1.1  | 188 | 7.86   | 259 | 8.68   |   |
| 5117 | Erlec1    | 1.1  | 164 | 24.34  | 244 | 26.87  |   |

Supplemental Table 3  
 FSH + Ad-E versus FSH + Ad-FOXO1(A3), 24 hours

|      | A            | B   | C    | D      | E    | F      | G |
|------|--------------|-----|------|--------|------|--------|---|
| 5118 | Lats2        | 1.1 | 243  | 15.34  | 372  | 16.93  |   |
| 5119 | Mbtps2       | 1.1 | 96   | 3.74   | 154  | 4.12   |   |
| 5120 | Paip2        | 1.1 | 50   | 55.99  | 87   | 61.79  |   |
| 5121 | Chd6         | 1.1 | 518  | 14.28  | 783  | 15.75  |   |
| 5122 | Fbxo33       | 1.1 | 98   | 8.96   | 136  | 9.89   |   |
| 5123 | Tnrc18       | 1.1 | 891  | 26.64  | 1369 | 29.39  |   |
| 5124 | Eif2b4       | 1.1 | 70   | 14.1   | 101  | 15.56  |   |
| 5125 | Rpl41        | 1.1 | 442  | 395.58 | 659  | 436.28 |   |
| 5126 | Bok          | 1.1 | 352  | 67.5   | 541  | 74.44  |   |
| 5127 | Dazap1       | 1.1 | 170  | 18.82  | 225  | 20.75  |   |
| 5128 | Ndufs5       | 1.1 | 37   | 27.8   | 49   | 30.65  |   |
| 5129 | Gnpnat1      | 1.1 | 72   | 8.39   | 107  | 9.25   |   |
| 5130 | Pi4k2a       | 1.1 | 133  | 22.43  | 181  | 24.73  |   |
| 5131 | Bclaf1       | 1.1 | 647  | 17     | 873  | 18.74  |   |
| 5132 | Tcof1        | 1.1 | 158  | 11.84  | 224  | 13.06  |   |
| 5133 | Yy1          | 1.1 | 186  | 31.66  | 271  | 34.89  |   |
| 5134 | Dgkq         | 1.1 | 109  | 7.74   | 167  | 8.53   |   |
| 5135 | Smim14       | 1.1 | 132  | 33.54  | 232  | 36.97  |   |
| 5136 | Abcb1a       | 1.1 | 3957 | 71.97  | 6163 | 79.3   |   |
| 5137 | Exo5         | 1.1 | 19   | 3.41   | 28   | 3.76   |   |
| 5138 | Wbscr22      | 1.1 | 41   | 9.59   | 65   | 10.56  |   |
| 5139 | Wibg         | 1.1 | 74   | 11.82  | 88   | 13.02  |   |
| 5140 | Eaf1         | 1.1 | 61   | 4.25   | 91   | 4.69   |   |
| 5141 | Trim41       | 1.1 | 141  | 13.42  | 208  | 14.78  |   |
| 5142 | Arfp2        | 1.1 | 95   | 15.1   | 135  | 16.63  |   |
| 5143 | Ikbip        | 1.1 | 122  | 8.59   | 134  | 9.46   |   |
| 5144 | Impact       | 1.1 | 194  | 17.77  | 277  | 19.57  |   |
| 5145 | LOC103689943 | 1.1 | 0    | 9.4    | 0    | 10.34  |   |
| 5146 | Rab33b       | 1.1 | 58   | 5.94   | 89   | 6.54   |   |
| 5147 | Cog4         | 1.1 | 211  | 19.06  | 305  | 20.99  |   |
| 5148 | Wnk1         | 1.1 | 863  | 25.22  | 1285 | 27.76  |   |
| 5149 | Hus1         | 1.1 | 59   | 2.81   | 82   | 3.09   |   |
| 5150 | Tmf1         | 1.1 | 170  | 13.88  | 239  | 15.28  |   |
| 5151 | Ctps1        | 1.1 | 134  | 16.82  | 228  | 18.51  |   |
| 5152 | Selt         | 1.1 | 97   | 32.95  | 140  | 36.26  |   |
| 5153 | Sdhc         | 1.1 | 270  | 78.22  | 392  | 86.06  |   |
| 5154 | Timm17a      | 1.1 | 60   | 21.23  | 88   | 23.36  |   |
| 5155 | Mcart1_2     | 1.1 | 139  | 24.87  | 204  | 27.36  |   |
| 5156 | Rbm12_1      | 1.1 | 24   | 13.33  | 24   | 14.66  |   |
| 5157 | Rcbtb2       | 1.1 | 121  | 12.17  | 183  | 13.39  |   |
| 5158 | Ulk1         | 1.1 | 248  | 16.81  | 359  | 18.49  |   |
| 5159 | Asxl1        | 1.1 | 308  | 18.18  | 433  | 19.99  |   |
| 5160 | Dnajc12      | 1.1 | 19   | 4.92   | 28   | 5.41   |   |
| 5161 | Dus2         | 1.1 | 27   | 3.18   | 38   | 3.5    |   |
| 5162 | Kansl1l      | 1.1 | 78   | 4.14   | 149  | 4.55   |   |
| 5163 | Prkrip1      | 1.1 | 94   | 6.04   | 138  | 6.64   |   |
| 5164 | Srp19        | 1.1 | 22   | 8.13   | 36   | 8.94   |   |
| 5165 | Zfp35        | 1.1 | 33   | 4.38   | 52   | 4.82   |   |
| 5166 | Arl8b        | 1.1 | 204  | 24.82  | 301  | 27.29  |   |
| 5167 | Nfx1         | 1.1 | 299  | 16.94  | 433  | 18.62  |   |
| 5168 | Kmt2e        | 1.1 | 530  | 20.64  | 770  | 22.69  |   |
| 5169 | Parg         | 1.1 | 182  | 10.66  | 263  | 11.72  |   |
| 5170 | Foxp4        | 1.1 | 116  | 7.18   | 189  | 7.89   |   |
| 5171 | Ppp3cb       | 1.1 | 158  | 14.03  | 244  | 15.42  |   |



Supplemental Table 3  
 FSH + Ad-E versus FSH + Ad-FOXO1(A3), 24 hours

|      | A        | B    | C    | D      | E    | F      | G |
|------|----------|------|------|--------|------|--------|---|
| 5172 | Prr12    | 1.1  | 237  | 12.73  | 348  | 13.98  |   |
| 5173 | Cpsf3    | 1.1  | 154  | 21.4   | 213  | 23.52  |   |
| 5174 | Srsf10   | 1.1  | 150  | 20.05  | 210  | 22.03  |   |
| 5175 | Ddx21    | 1.1  | 198  | 24.47  | 285  | 26.88  |   |
| 5176 | Urb1     | 1.1  | 145  | 5.66   | 205  | 6.21   |   |
| 5177 | Pdzd11   | 1.1  | 49   | 8.6    | 71   | 9.45   |   |
| 5178 | Tmem183a | 1.1  | 176  | 21.6   | 256  | 23.72  |   |
| 5179 | Map7d1   | 1.1  | 203  | 19.51  | 284  | 21.43  |   |
| 5180 | Ptprj    | 1.1  | 95   | 3.08   | 141  | 3.38   |   |
| 5181 | Tbc1d31  | 1.1  | 47   | 3.11   | 69   | 3.41   |   |
| 5182 | Ctnnd1   | 1.1  | 1009 | 64.05  | 1463 | 70.31  |   |
| 5183 | Acp1     | 1.1  | 49   | 11.02  | 64   | 12.1   |   |
| 5184 | Lrwd1    | 1.1  | 52   | 7.67   | 80   | 8.42   |   |
| 5185 | Anxa5    | 1.1  | 696  | 145.48 | 1052 | 159.64 |   |
| 5186 | Prmt3    | 1.1  | 76   | 8.18   | 110  | 8.97   |   |
| 5187 | Psen2    | 1.1  | 101  | 13.55  | 156  | 14.86  |   |
| 5188 | Cul1     | 1.1  | 273  | 24.63  | 417  | 27.02  |   |
| 5189 | Rps24    | 1.1  | 107  | 177.31 | 176  | 194.49 |   |
| 5190 | Fmnl3    | 1.1  | 152  | 17.54  | 224  | 19.24  |   |
| 5191 | Hadha    | 1.1  | 469  | 48.14  | 670  | 52.8   |   |
| 5192 | Ogn_1    | 1.1  | 911  | 254.4  | 1184 | 278.97 |   |
| 5193 | Smad5    | 1.1  | 172  | 23.59  | 251  | 25.87  |   |
| 5194 | Arpin    | 1.1  | 50   | 4.26   | 69   | 4.67   |   |
| 5195 | Atg5     | 1.1  | 115  | 11.21  | 136  | 12.29  |   |
| 5196 | Ccdc94_1 | 1.1  | 38   | 7.88   | 58   | 8.64   |   |
| 5197 | Gmeb2    | 1.1  | 69   | 4.79   | 99   | 5.25   |   |
| 5198 | MGC95210 | 1.1  | 38   | 3.34   | 43   | 3.66   |   |
| 5199 | Parp12   | 1.1  | 71   | 7.68   | 105  | 8.42   |   |
| 5200 | Stil     | 1.1  | 38   | 2.27   | 55   | 2.49   |   |
| 5201 | Zfp192   | 1.1  | 94   | 3.7    | 133  | 4.06   |   |
| 5202 | Lmna     | 1.1  | 276  | 30.56  | 409  | 33.51  |   |
| 5203 | Dtx3l    | 1.1  | 199  | 14.06  | 291  | 15.41  |   |
| 5204 | Dpy19l3  | 1.1  | 149  | 6.23   | 226  | 6.83   |   |
| 5205 | Pias1    | 1.1  | 123  | 14.17  | 183  | 15.52  |   |
| 5206 | Topors   | 1.1  | 164  | 13.28  | 249  | 14.54  |   |
| 5207 | Tcerg1   | 1.1  | 318  | 18.69  | 453  | 20.47  |   |
| 5208 | Ice2     | 1.1  | 87   | 6.06   | 134  | 6.63   |   |
| 5209 | Plcg1    | 1.09 | 693  | 46.63  | 1021 | 51.06  |   |
| 5210 | Trmt6    | 1.09 | 33   | 3.48   | 51   | 3.81   |   |
| 5211 | Abrac1   | 1.09 | 134  | 51.14  | 238  | 55.98  |   |
| 5212 | Pacs2    | 1.09 | 216  | 17.28  | 295  | 18.92  |   |
| 5213 | Pde10a   | 1.09 | 205  | 8.42   | 275  | 9.22   |   |
| 5214 | Zfp207   | 1.09 | 340  | 66.41  | 510  | 72.7   |   |
| 5215 | Mrps2    | 1.09 | 100  | 8.51   | 145  | 9.32   |   |
| 5216 | H1fx     | 1.09 | 41   | 25.64  | 60   | 28.05  |   |
| 5217 | Polr1b   | 1.09 | 45   | 3.95   | 74   | 4.32   |   |
| 5218 | Sdhd     | 1.09 | 264  | 75.74  | 376  | 82.86  |   |
| 5219 | Ythdf2   | 1.09 | 163  | 21.33  | 240  | 23.34  |   |
| 5220 | Ube2i    | 1.09 | 94   | 81.98  | 211  | 89.66  |   |
| 5221 | Klc2     | 1.09 | 151  | 16.63  | 213  | 18.18  |   |
| 5222 | Mtmt10   | 1.09 | 89   | 5.22   | 116  | 5.71   |   |
| 5223 | Top3a    | 1.09 | 99   | 7.75   | 147  | 8.48   |   |
| 5224 | Csnk1a1  | 1.09 | 769  | 100.62 | 1197 | 110.02 |   |
| 5225 | Foxj3    | 1.09 | 189  | 12.02  | 260  | 13.14  |   |

Supplemental Table 3  
 FSH + Ad-E versus FSH + Ad-FOXO1(A3), 24 hours

|      | A              | B    | C    | D      | E    | F      | G |
|------|----------------|------|------|--------|------|--------|---|
| 5226 | Arhgef39       | 1.09 | 24   | 2.05   | 37   | 2.24   |   |
| 5227 | Clp1           | 1.09 | 27   | 5.22   | 38   | 5.7    |   |
| 5228 | Dcaf10         | 1.09 | 123  | 4.65   | 190  | 5.08   |   |
| 5229 | Las1l          | 1.09 | 114  | 9.96   | 173  | 10.88  |   |
| 5230 | Epb41l4b       | 1.09 | 28   | 0.65   | 25   | 0.7    |   |
| 5231 | LOC100360573_2 | 1.09 | 5    | 23.59  | 4    | 25.78  |   |
| 5232 | Lrrc28         | 1.09 | 30   | 1.61   | 40   | 1.75   |   |
| 5233 | Zfp248         | 1.09 | 24   | 1.25   | 34   | 1.37   |   |
| 5234 | Cdh2           | 1.09 | 1107 | 81.94  | 1653 | 89.52  |   |
| 5235 | Osbp           | 1.09 | 292  | 22.1   | 425  | 24.14  |   |
| 5236 | Rab31          | 1.09 | 150  | 11.04  | 218  | 12.06  |   |
| 5237 | Acox1          | 1.09 | 314  | 22.58  | 436  | 24.65  |   |
| 5238 | Ift140         | 1.09 | 218  | 10.75  | 280  | 11.73  |   |
| 5239 | Lrp6           | 1.09 | 209  | 13.47  | 295  | 14.7   |   |
| 5240 | Eil            | 1.09 | 147  | 11.2   | 239  | 12.22  |   |
| 5241 | MGC94199_1     | 1.09 | 0    | 6.91   | 0    | 7.53   |   |
| 5242 | Bloc1s1        | 1.09 | 44   | 24.45  | 66   | 26.67  |   |
| 5243 | Trafd1         | 1.09 | 180  | 22.32  | 279  | 24.35  |   |
| 5244 | Pdia6          | 1.09 | 826  | 169.16 | 1203 | 184.49 |   |
| 5245 | Ezr            | 1.09 | 120  | 13.36  | 169  | 14.57  |   |
| 5246 | Slc39a6        | 1.09 | 224  | 22.52  | 343  | 24.56  |   |
| 5247 | Cd47           | 1.09 | 322  | 45.41  | 509  | 49.51  |   |
| 5248 | Med19          | 1.09 | 74   | 10.06  | 113  | 10.97  |   |
| 5249 | Pcdhga8        | 1.09 | 22   | 3.58   | 32   | 3.91   |   |
| 5250 | RGD1307830     | 1.09 | 34   | 6.47   | 49   | 7.05   |   |
| 5251 | Rps6           | 1.09 | 0    | 11.68  | 0    | 12.73  |   |
| 5252 | Lrp6           | 1.09 | 294  | 14.59  | 412  | 15.9   |   |
| 5253 | Cggbp1         | 1.09 | 367  | 30.21  | 540  | 32.93  |   |
| 5254 | Pum1           | 1.09 | 552  | 28.01  | 826  | 30.53  |   |
| 5255 | Setdb1         | 1.09 | 279  | 16.9   | 387  | 18.42  |   |
| 5256 | Tnrc6b         | 1.09 | 751  | 12.35  | 1091 | 13.45  |   |
| 5257 | Adam15         | 1.09 | 165  | 19.6   | 236  | 21.35  |   |
| 5258 | Cep89          | 1.09 | 51   | 4.41   | 67   | 4.8    |   |
| 5259 | Ints12         | 1.09 | 35   | 7.06   | 54   | 7.69   |   |
| 5260 | Tpm3           | 1.09 | 373  | 46.43  | 519  | 50.58  |   |
| 5261 | Ncaph2         | 1.09 | 219  | 31.22  | 325  | 34     |   |
| 5262 | Rc3h2          | 1.09 | 346  | 19.18  | 532  | 20.89  |   |
| 5263 | Usp3           | 1.09 | 187  | 15.09  | 240  | 16.43  |   |
| 5264 | Ndufb7         | 1.09 | 128  | 74.37  | 180  | 80.96  |   |
| 5265 | Znf740         | 1.09 | 201  | 16.94  | 306  | 18.44  |   |
| 5266 | Dock3          | 1.09 | 294  | 8.25   | 440  | 8.98   |   |
| 5267 | Efcab14        | 1.09 | 211  | 12.19  | 318  | 13.26  |   |
| 5268 | Prpf40a        | 1.09 | 251  | 21.64  | 358  | 23.54  |   |
| 5269 | Pphln1         | 1.09 | 221  | 8.57   | 331  | 9.32   |   |
| 5270 | Col24a1        | 1.09 | 22   | 0.98   | 32   | 1.07   |   |
| 5271 | Sirt1          | 1.09 | 106  | 9.23   | 168  | 10.03  |   |
| 5272 | AABR07067760.1 | 1.09 | 28   | 29.83  | 37   | 32.44  |   |
| 5273 | Aldh5a1        | 1.09 | 28   | 1.47   | 40   | 1.59   |   |
| 5274 | Dok2           | 1.09 | 14   | 1.42   | 21   | 1.54   |   |
| 5275 | Fam102a        | 1.09 | 39   | 3.02   | 58   | 3.28   |   |
| 5276 | Fam133b        | 1.09 | 49   | 5.4    | 66   | 5.87   |   |
| 5277 | Immp1l         | 1.09 | 42   | 6.32   | 56   | 6.87   |   |
| 5278 | Jrkl           | 1.09 | 22   | 2.75   | 32   | 2.99   |   |
| 5279 | Mrpl21         | 1.09 | 28   | 8.46   | 40   | 9.21   |   |

Supplemental Table 3  
 FSH + Ad-E versus FSH + Ad-FOXO1(A3), 24 hours

|      | A            | B    | C   | D      | E    | F      | G |
|------|--------------|------|-----|--------|------|--------|---|
| 5280 | Nup160       | 1.09 | 75  | 5.41   | 99   | 5.89   |   |
| 5281 | Pot1         | 1.09 | 78  | 7.21   | 120  | 7.84   |   |
| 5282 | Rbm48        | 1.09 | 10  | 1.94   | 18   | 2.11   |   |
| 5283 | Ric8b        | 1.09 | 146 | 5.65   | 180  | 6.14   |   |
| 5284 | Sertad3      | 1.09 | 15  | 3.03   | 21   | 3.3    |   |
| 5285 | Syne1        | 1.09 | 37  | 0.27   | 46   | 0.29   |   |
| 5286 | Arhgdia      | 1.09 | 938 | 181.42 | 1367 | 197.26 |   |
| 5287 | Hp1bp3       | 1.09 | 611 | 53.16  | 907  | 57.8   |   |
| 5288 | Ogfr         | 1.09 | 177 | 25.77  | 236  | 28.01  |   |
| 5289 | ldh2         | 1.09 | 320 | 44.71  | 473  | 48.59  |   |
| 5290 | RGD1564379   | 1.09 | 82  | 9.45   | 110  | 10.26  |   |
| 5291 | Eny2         | 1.09 | 68  | 9.37   | 111  | 10.18  |   |
| 5292 | Arpc5l       | 1.09 | 74  | 15.18  | 99   | 16.49  |   |
| 5293 | Brap         | 1.09 | 70  | 10.9   | 138  | 11.84  |   |
| 5294 | Exosc9       | 1.09 | 80  | 10.2   | 107  | 11.08  |   |
| 5295 | Myd88        | 1.09 | 52  | 7.81   | 81   | 8.48   |   |
| 5296 | Add1         | 1.09 | 751 | 59.39  | 1125 | 64.49  |   |
| 5297 | Dynlt3       | 1.09 | 43  | 7.09   | 64   | 7.7    |   |
| 5298 | Fbxo42       | 1.09 | 189 | 9.55   | 272  | 10.37  |   |
| 5299 | Pnrc2        | 1.09 | 224 | 35.46  | 328  | 38.51  |   |
| 5300 | Daam1        | 1.09 | 352 | 16.52  | 490  | 17.93  |   |
| 5301 | Riok2        | 1.09 | 80  | 12.2   | 122  | 13.25  |   |
| 5302 | Taf10        | 1.09 | 77  | 28.73  | 109  | 31.19  |   |
| 5303 | Cipc         | 1.09 | 120 | 9.45   | 178  | 10.25  |   |
| 5304 | Senp5        | 1.09 | 0   | 4.98   | 0    | 5.41   |   |
| 5305 | Sept11       | 1.09 | 672 | 36.96  | 977  | 40.11  |   |
| 5306 | Plxnb1       | 1.08 | 149 | 8.83   | 227  | 9.58   |   |
| 5307 | Camk2d       | 1.08 | 270 | 16.61  | 368  | 18.01  |   |
| 5308 | Anapc5       | 1.08 | 776 | 96.73  | 1155 | 104.92 |   |
| 5309 | Smarcal1     | 1.08 | 101 | 8.35   | 122  | 9.06   |   |
| 5310 | Cstf2t       | 1.08 | 202 | 20.5   | 293  | 22.24  |   |
| 5311 | LOC102546354 | 1.08 | 26  | 2.32   | 24   | 2.51   |   |
| 5312 | Rabl2a       | 1.08 | 47  | 7.74   | 73   | 8.39   |   |
| 5313 | Tmem87a      | 1.08 | 140 | 6.31   | 195  | 6.84   |   |
| 5314 | Bend3        | 1.08 | 43  | 3.65   | 61   | 3.96   |   |
| 5315 | Cnppd1       | 1.08 | 148 | 22.91  | 210  | 24.83  |   |
| 5316 | Cntln        | 1.08 | 44  | 2.89   | 73   | 3.13   |   |
| 5317 | Etfb         | 1.08 | 29  | 7.98   | 38   | 8.65   |   |
| 5318 | Nars2        | 1.08 | 45  | 3.18   | 82   | 3.45   |   |
| 5319 | Rbfa         | 1.08 | 55  | 8.9    | 69   | 9.65   |   |
| 5320 | Zdhhc21      | 1.08 | 52  | 4.02   | 73   | 4.36   |   |
| 5321 | Tnip1        | 1.08 | 205 | 22.5   | 303  | 24.38  |   |
| 5322 | Abr          | 1.08 | 94  | 8.53   | 140  | 9.24   |   |
| 5323 | Etf1         | 1.08 | 253 | 33.13  | 363  | 35.9   |   |
| 5324 | Thap4        | 1.08 | 102 | 12.96  | 144  | 14.04  |   |
| 5325 | Fam3c        | 1.08 | 127 | 17.8   | 189  | 19.29  |   |
| 5326 | Isy1         | 1.08 | 72  | 12     | 94   | 12.99  |   |
| 5327 | Kif21a       | 1.08 | 84  | 3.54   | 114  | 3.83   |   |
| 5328 | RGD1306746   | 1.08 | 74  | 7.15   | 101  | 7.74   |   |
| 5329 | Orc5         | 1.08 | 113 | 12.24  | 153  | 13.26  |   |
| 5330 | Eif4enif1    | 1.08 | 148 | 13.58  | 226  | 14.71  |   |
| 5331 | Rpa2         | 1.08 | 69  | 9.88   | 101  | 10.7   |   |
| 5332 | Armcx5       | 1.08 | 28  | 6.16   | 42   | 6.67   |   |
| 5333 | Fktn         | 1.08 | 210 | 11.36  | 319  | 12.29  |   |

Supplemental Table 3  
 FSH + Ad-E versus FSH + Ad-FOXO1(A3), 24 hours

|      | A              | B    | C   | D     | E   | F     | G |
|------|----------------|------|-----|-------|-----|-------|---|
| 5334 | Utp20          | 1.08 | 212 | 7.51  | 328 | 8.13  |   |
| 5335 | Chmp2b         | 1.08 | 104 | 14.62 | 149 | 15.83 |   |
| 5336 | Cbll1          | 1.08 | 105 | 8.56  | 157 | 9.27  |   |
| 5337 | Ak3            | 1.08 | 222 | 39.12 | 361 | 42.34 |   |
| 5338 | Bysl           | 1.08 | 47  | 8.06  | 61  | 8.72  |   |
| 5339 | Gsto2_1        | 1.08 | 14  | 7.9   | 18  | 8.55  |   |
| 5340 | Smurf2         | 1.08 | 173 | 12.16 | 259 | 13.15 |   |
| 5341 | Zfp637         | 1.08 | 90  | 24.48 | 142 | 26.49 |   |
| 5342 | Aptx           | 1.08 | 71  | 9.74  | 99  | 10.54 |   |
| 5343 | Tmem263        | 1.08 | 224 | 12.63 | 289 | 13.67 |   |
| 5344 | Wdr46          | 1.08 | 57  | 5.91  | 77  | 6.4   |   |
| 5345 | Mtch2          | 1.08 | 166 | 53.25 | 230 | 57.59 |   |
| 5346 | Paf1           | 1.08 | 156 | 27.91 | 229 | 30.19 |   |
| 5347 | Add3           | 1.08 | 284 | 20.2  | 433 | 21.84 |   |
| 5348 | Adnp           | 1.08 | 589 | 32.5  | 876 | 35.14 |   |
| 5349 | Trim23         | 1.08 | 86  | 6.98  | 107 | 7.54  |   |
| 5350 | Chd1           | 1.08 | 164 | 8.93  | 251 | 9.65  |   |
| 5351 | Naa25          | 1.08 | 159 | 8.23  | 207 | 8.89  |   |
| 5352 | Dlc1           | 1.08 | 99  | 6.6   | 150 | 7.14  |   |
| 5353 | LOC100909609   | 1.08 | 370 | 13.31 | 534 | 14.38 |   |
| 5354 | Dsg2           | 1.08 | 277 | 11.25 | 436 | 12.16 |   |
| 5355 | Dnmt3a         | 1.08 | 126 | 7.77  | 188 | 8.39  |   |
| 5356 | Znfx1          | 1.08 | 133 | 4.61  | 185 | 4.98  |   |
| 5357 | Pkn3           | 1.08 | 367 | 9.64  | 469 | 10.42 |   |
| 5358 | AABR07026969.1 | 1.08 | 9   | 0.58  | 15  | 0.63  |   |
| 5359 | Cdc26          | 1.08 | 74  | 12.4  | 92  | 13.39 |   |
| 5360 | Cntrob         | 1.08 | 24  | 1.98  | 35  | 2.14  |   |
| 5361 | Ctps2          | 1.08 | 290 | 26.89 | 449 | 29.04 |   |
| 5362 | Cwc15          | 1.08 | 56  | 14.5  | 72  | 15.66 |   |
| 5363 | Ddx39a         | 1.08 | 131 | 16.06 | 164 | 17.34 |   |
| 5364 | Ptbp3          | 1.08 | 325 | 33.73 | 496 | 36.43 |   |
| 5365 | Rpp14          | 1.08 | 68  | 14.78 | 101 | 15.96 |   |
| 5366 | Rrs1           | 1.08 | 18  | 4.03  | 26  | 4.36  |   |
| 5367 | Srr            | 1.08 | 109 | 9.63  | 141 | 10.4  |   |
| 5368 | Tgm4           | 1.08 | 30  | 2.26  | 46  | 2.44  |   |
| 5369 | Tmem9b         | 1.08 | 71  | 4.82  | 96  | 5.2   |   |
| 5370 | Acta1          | 1.08 | 9   | 2.27  | 12  | 2.45  |   |
| 5371 | Ankrd6         | 1.08 | 17  | 0.65  | 26  | 0.7   |   |
| 5372 | Caskin2        | 1.08 | 121 | 8.68  | 174 | 9.38  |   |
| 5373 | Cntf           | 1.08 | 11  | 2.98  | 13  | 3.22  |   |
| 5374 | Dr1_2          | 1.08 | 0   | 4.67  | 0   | 5.04  |   |
| 5375 | Gfra3          | 1.08 | 9   | 1.47  | 13  | 1.58  |   |
| 5376 | Gnpda2         | 1.08 | 9   | 1.79  | 17  | 1.94  |   |
| 5377 | Gse1           | 1.08 | 67  | 2.94  | 83  | 3.17  |   |
| 5378 | Mrps26         | 1.08 | 18  | 6.73  | 27  | 7.27  |   |
| 5379 | Mybl1          | 1.08 | 15  | 0.66  | 23  | 0.71  |   |
| 5380 | Pmaip1         | 1.08 | 9   | 1.18  | 13  | 1.27  |   |
| 5381 | RGD1305455     | 1.08 | 41  | 2.5   | 53  | 2.7   |   |
| 5382 | RT1-T24-1      | 1.08 | 71  | 2.85  | 70  | 3.08  |   |
| 5383 | Slc9a7         | 1.08 | 103 | 1.27  | 114 | 1.37  |   |
| 5384 | SNORD66        | 1.08 | 0   | 86.9  | 0   | 93.84 |   |
| 5385 | Tmem51         | 1.08 | 48  | 4.49  | 70  | 4.84  |   |
| 5386 | Ttll5          | 1.08 | 66  | 3.24  | 89  | 3.5   |   |
| 5387 | Zdbf2          | 1.08 | 18  | 0.6   | 28  | 0.65  |   |

Supplemental Table 3  
 FSH + Ad-E versus FSH + Ad-FOXO1(A3), 24 hours

|      | A        | B    | C    | D      | E    | F      | G |
|------|----------|------|------|--------|------|--------|---|
| 5388 | Zfp362   | 1.08 | 77   | 12.96  | 113  | 14     |   |
| 5389 | Zfp964   | 1.08 | 18   | 4.23   | 26   | 4.56   |   |
| 5390 | Ubr2     | 1.08 | 477  | 22.71  | 706  | 24.52  |   |
| 5391 | Igf1r    | 1.08 | 1964 | 110.89 | 3256 | 119.67 |   |
| 5392 | Nip30    | 1.08 | 120  | 18.6   | 174  | 20.07  |   |
| 5393 | Ube2g2   | 1.08 | 108  | 16.61  | 160  | 17.92  |   |
| 5394 | Ilf3     | 1.08 | 357  | 25.93  | 513  | 27.98  |   |
| 5395 | Golga7   | 1.08 | 191  | 40.19  | 294  | 43.35  |   |
| 5396 | Fam13c   | 1.08 | 276  | 22.08  | 345  | 23.81  |   |
| 5397 | Ski      | 1.08 | 212  | 26.42  | 348  | 28.49  |   |
| 5398 | Hars     | 1.08 | 110  | 19.54  | 168  | 21.07  |   |
| 5399 | Kif20a   | 1.08 | 50   | 6.45   | 69   | 6.95   |   |
| 5400 | Htra2    | 1.08 | 59   | 10.78  | 77   | 11.63  |   |
| 5401 | Yipf5    | 1.08 | 164  | 17.47  | 240  | 18.84  |   |
| 5402 | Qrich1   | 1.08 | 364  | 27.29  | 539  | 29.41  |   |
| 5403 | Dnlz     | 1.08 | 43   | 9.89   | 63   | 10.66  |   |
| 5404 | Taf1     | 1.08 | 121  | 7.92   | 176  | 8.54   |   |
| 5405 | Cblb     | 1.08 | 319  | 11.59  | 466  | 12.49  |   |
| 5406 | Ubtf     | 1.08 | 345  | 24.92  | 494  | 26.86  |   |
| 5407 | Luc7l3   | 1.08 | 248  | 26.09  | 389  | 28.12  |   |
| 5408 | Kpna6    | 1.08 | 251  | 17.89  | 354  | 19.28  |   |
| 5409 | Nup98    | 1.08 | 420  | 18.35  | 595  | 19.78  |   |
| 5410 | Lyn      | 1.08 | 53   | 3.59   | 82   | 3.87   |   |
| 5411 | Ube3a    | 1.08 | 197  | 8.2    | 308  | 8.83   |   |
| 5412 | Vps51    | 1.08 | 98   | 15.74  | 127  | 16.96  |   |
| 5413 | Dcp1b    | 1.08 | 64   | 6.09   | 100  | 6.56   |   |
| 5414 | Mex3d    | 1.08 | 117  | 15.65  | 168  | 16.86  |   |
| 5415 | Ube3c    | 1.08 | 275  | 17.83  | 379  | 19.21  |   |
| 5416 | Adgrl2   | 1.08 | 384  | 19.55  | 588  | 21.07  |   |
| 5417 | Fam104a  | 1.08 | 85   | 11.99  | 129  | 12.92  |   |
| 5418 | Mon2     | 1.08 | 366  | 16.65  | 531  | 17.94  |   |
| 5419 | Sos1     | 1.08 | 239  | 11.05  | 371  | 11.9   |   |
| 5420 | Comt     | 1.08 | 143  | 24.12  | 225  | 25.98  |   |
| 5421 | Fam98b   | 1.08 | 24   | 6.95   | 29   | 7.48   |   |
| 5422 | Med30    | 1.08 | 33   | 10.12  | 50   | 10.9   |   |
| 5423 | Nfya     | 1.08 | 230  | 20.67  | 322  | 22.25  |   |
| 5424 | Snapc4   | 1.08 | 37   | 2.26   | 55   | 2.43   |   |
| 5425 | Tfap4    | 1.08 | 42   | 3.76   | 61   | 4.05   |   |
| 5426 | Uba3     | 1.08 | 196  | 29.27  | 311  | 31.51  |   |
| 5427 | Csnk1d   | 1.08 | 460  | 33.86  | 718  | 36.45  |   |
| 5428 | Vdac3    | 1.08 | 309  | 76.24  | 454  | 82.07  |   |
| 5429 | Sugt1    | 1.08 | 118  | 18.87  | 175  | 20.31  |   |
| 5430 | Slc25a16 | 1.08 | 96   | 3.69   | 154  | 3.97   |   |
| 5431 | Irf3     | 1.08 | 184  | 26.83  | 264  | 28.87  |   |
| 5432 | Seh1l    | 1.08 | 301  | 5.03   | 463  | 5.41   |   |
| 5433 | Fam110b  | 1.08 | 41   | 9.08   | 59   | 9.77   |   |
| 5434 | Lrrc49   | 1.08 | 62   | 5      | 87   | 5.38   |   |
| 5435 | Smyd5    | 1.08 | 49   | 6.77   | 69   | 7.29   |   |
| 5436 | Tbl2     | 1.08 | 72   | 4.84   | 91   | 5.2    |   |
| 5437 | Zfp326   | 1.08 | 143  | 13.65  | 203  | 14.68  |   |
| 5438 | Rab23    | 1.08 | 165  | 11.76  | 264  | 12.65  |   |
| 5439 | Gripap1  | 1.08 | 218  | 17.49  | 256  | 18.8   |   |
| 5440 | Atad2b   | 1.08 | 162  | 5.73   | 251  | 6.16   |   |
| 5441 | Srsf1    | 1.08 | 490  | 34.46  | 718  | 37.04  |   |

Supplemental Table 3  
 FSH + Ad-E versus FSH + Ad-FOXO1(A3), 24 hours

|      | A              | B    | C    | D      | E    | F      | G |
|------|----------------|------|------|--------|------|--------|---|
| 5442 | Alms1          | 1.08 | 199  | 5.09   | 256  | 5.48   |   |
| 5443 | Ubr3           | 1.08 | 211  | 9.77   | 312  | 10.5   |   |
| 5444 | Rnf111         | 1.07 | 234  | 13.69  | 360  | 14.72  |   |
| 5445 | Elovl4         | 1.07 | 17   | 1.88   | 26   | 2.02   |   |
| 5446 | Ska3           | 1.07 | 33   | 2.59   | 39   | 2.79   |   |
| 5447 | Coq4           | 1.07 | 22   | 3.68   | 38   | 3.95   |   |
| 5448 | Ctsc           | 1.07 | 22   | 3.09   | 38   | 3.32   |   |
| 5449 | Haus7          | 1.07 | 20   | 2.92   | 29   | 3.14   |   |
| 5450 | LOC102549842   | 1.07 | 96   | 3.62   | 167  | 3.89   |   |
| 5451 | LOC691920      | 1.07 | 165  | 2.74   | 255  | 2.94   |   |
| 5452 | Map3k2         | 1.07 | 85   | 5.92   | 117  | 6.36   |   |
| 5453 | Mylk           | 1.07 | 63   | 2.17   | 90   | 2.33   |   |
| 5454 | Pat1           | 1.07 | 161  | 12.99  | 249  | 13.96  |   |
| 5455 | Pcca           | 1.07 | 70   | 5.14   | 108  | 5.53   |   |
| 5456 | Trim37         | 1.07 | 136  | 8.04   | 197  | 8.64   |   |
| 5457 | Txnl1          | 1.07 | 200  | 43.75  | 284  | 47.02  |   |
| 5458 | Dhx15          | 1.07 | 318  | 39.13  | 468  | 42.04  |   |
| 5459 | Tgs1           | 1.07 | 116  | 7.32   | 169  | 7.86   |   |
| 5460 | Csnk2a1        | 1.07 | 344  | 53.05  | 497  | 56.99  |   |
| 5461 | LOC100911993   | 1.07 | 157  | 6.17   | 209  | 6.63   |   |
| 5462 | Mt-nd4         | 1.07 | 4996 | 1328.2 | 7216 | 1426.1 |   |
| 5463 | Bmpr2          | 1.07 | 1376 | 88.9   | 1948 | 95.43  |   |
| 5464 | RGD1304704     | 1.07 | 197  | 50.23  | 292  | 53.91  |   |
| 5465 | Ost4           | 1.07 | 64   | 38.7   | 89   | 41.54  |   |
| 5466 | RGD1308106     | 1.07 | 177  | 12.32  | 258  | 13.22  |   |
| 5467 | AABR07037528.1 | 1.07 | 23   | 6.78   | 33   | 7.27   |   |
| 5468 | Fdxacb1        | 1.07 | 32   | 4.75   | 37   | 5.09   |   |
| 5469 | Harbi1         | 1.07 | 27   | 3.44   | 39   | 3.69   |   |
| 5470 | Leo1           | 1.07 | 55   | 6.32   | 87   | 6.78   |   |
| 5471 | Zfp646         | 1.07 | 232  | 14.78  | 331  | 15.85  |   |
| 5472 | Plp2           | 1.07 | 98   | 49.2   | 119  | 52.77  |   |
| 5473 | Ddx19a         | 1.07 | 427  | 11.28  | 634  | 12.09  |   |
| 5474 | Col5a1         | 1.07 | 1088 | 57.65  | 1605 | 61.82  |   |
| 5475 | Nup133         | 1.07 | 121  | 9.89   | 168  | 10.61  |   |
| 5476 | Fn3krp         | 1.07 | 58   | 7.61   | 79   | 8.16   |   |
| 5477 | Itpa           | 1.07 | 113  | 32.25  | 170  | 34.58  |   |
| 5478 | Prosc          | 1.07 | 61   | 9.37   | 94   | 10.05  |   |
| 5479 | Usp28          | 1.07 | 250  | 14.13  | 387  | 15.14  |   |
| 5480 | Glcci1         | 1.07 | 140  | 6.66   | 211  | 7.14   |   |
| 5481 | Lonrf1         | 1.07 | 54   | 4.35   | 63   | 4.66   |   |
| 5482 | Lsm14b         | 1.07 | 89   | 16.47  | 116  | 17.65  |   |
| 5483 | Poc5           | 1.07 | 41   | 2.35   | 61   | 2.51   |   |
| 5484 | AI314180       | 1.07 | 368  | 21.43  | 557  | 22.96  |   |
| 5485 | Hsf2           | 1.07 | 130  | 13.8   | 213  | 14.78  |   |
| 5486 | Sgpl1          | 1.07 | 336  | 24.83  | 498  | 26.6   |   |
| 5487 | Col4a1         | 1.07 | 141  | 7.37   | 198  | 7.9    |   |
| 5488 | Spred2         | 1.07 | 71   | 7.9    | 117  | 8.46   |   |
| 5489 | Cflar          | 1.07 | 114  | 5.87   | 178  | 6.28   |   |
| 5490 | Nek7           | 1.07 | 49   | 12.17  | 85   | 13.03  |   |
| 5491 | Pigg           | 1.07 | 0    | 2.55   | 0    | 2.73   |   |
| 5492 | Trim21         | 1.07 | 46   | 3.28   | 62   | 3.52   |   |
| 5493 | Actr10         | 1.07 | 113  | 26.06  | 172  | 27.89  |   |
| 5494 | Cbx5           | 1.07 | 63   | 12.55  | 88   | 13.43  |   |
| 5495 | Elmod2         | 1.07 | 15   | 3.87   | 43   | 4.14   |   |

Supplemental Table 3  
 FSH + Ad-E versus FSH + Ad-FOXO1(A3), 24 hours

|      | A            | B    | C    | D      | E    | F      | G |
|------|--------------|------|------|--------|------|--------|---|
| 5496 | Man1a2       | 1.07 | 126  | 10.62  | 180  | 11.36  |   |
| 5497 | Mta2         | 1.07 | 364  | 43.26  | 526  | 46.29  |   |
| 5498 | Cask_2       | 1.07 | 173  | 23.49  | 252  | 25.13  |   |
| 5499 | Adam17       | 1.07 | 329  | 26.27  | 481  | 28.11  |   |
| 5500 | Hdgf         | 1.07 | 451  | 82.92  | 629  | 88.71  |   |
| 5501 | Atxn2        | 1.07 | 285  | 19.32  | 452  | 20.67  |   |
| 5502 | LOC606294    | 1.07 | 74   | 9.13   | 108  | 9.77   |   |
| 5503 | Strap        | 1.07 | 136  | 33.99  | 191  | 36.36  |   |
| 5504 | LOC691807    | 1.07 | 72   | 24.14  | 102  | 25.82  |   |
| 5505 | Psmc8        | 1.07 | 287  | 63.17  | 414  | 67.54  |   |
| 5506 | Ccnk         | 1.07 | 114  | 13.05  | 176  | 13.95  |   |
| 5507 | Adamts10     | 1.07 | 431  | 28.26  | 663  | 30.21  |   |
| 5508 | Podxl2       | 1.07 | 141  | 21.11  | 195  | 22.57  |   |
| 5509 | Tpt1         | 1.07 | 845  | 557.03 | 1300 | 594.98 |   |
| 5510 | Akr1b8       | 1.07 | 23   | 2.05   | 33   | 2.19   |   |
| 5511 | Ap4e1        | 1.07 | 76   | 4.89   | 108  | 5.22   |   |
| 5512 | Arl15        | 1.07 | 82   | 4.14   | 160  | 4.42   |   |
| 5513 | Asap3        | 1.07 | 20   | 0.93   | 23   | 1      |   |
| 5514 | Asxl3        | 1.07 | 14   | 0.38   | 28   | 0.41   |   |
| 5515 | Igfbp2       | 1.07 | 14   | 3.96   | 20   | 4.23   |   |
| 5516 | Kremen1      | 1.07 | 54   | 4.01   | 80   | 4.29   |   |
| 5517 | LOC100361475 | 1.07 | 0    | 1.68   | 0    | 1.79   |   |
| 5518 | LOC100910164 | 1.07 | 1    | 2.88   | 4    | 3.08   |   |
| 5519 | Map6         | 1.07 | 51   | 1.45   | 87   | 1.55   |   |
| 5520 | Nxph2        | 1.07 | 7    | 3.26   | 10   | 3.48   |   |
| 5521 | Ppm1b        | 1.07 | 248  | 10.61  | 377  | 11.33  |   |
| 5522 | Ppp1r3d      | 1.07 | 7    | 0.83   | 10   | 0.88   |   |
| 5523 | Rbm20        | 1.07 | 13   | 0.38   | 19   | 0.41   |   |
| 5524 | RGD1310553   | 1.07 | 63   | 6.66   | 96   | 7.12   |   |
| 5525 | Ror1         | 1.07 | 11   | 0.49   | 14   | 0.52   |   |
| 5526 | Rpl35a_3     | 1.07 | 0    | 7.68   | 0    | 8.2    |   |
| 5527 | Snopc3       | 1.07 | 92   | 12.52  | 151  | 13.37  |   |
| 5528 | Stx1a        | 1.07 | 40   | 2.35   | 52   | 2.51   |   |
| 5529 | Tfdp2        | 1.07 | 65   | 3.69   | 87   | 3.94   |   |
| 5530 | Timp3        | 1.07 | 11   | 2.9    | 14   | 3.1    |   |
| 5531 | Tmem19       | 1.07 | 19   | 4.01   | 28   | 4.29   |   |
| 5532 | Tmem29       | 1.07 | 17   | 15.09  | 29   | 16.11  |   |
| 5533 | Ust          | 1.07 | 39   | 1.24   | 87   | 1.33   |   |
| 5534 | Palm2        | 1.07 | 64   | 1.72   | 81   | 1.84   |   |
| 5535 | Sap25        | 1.07 | 7    | 2.14   | 12   | 2.29   |   |
| 5536 | Slc25a14     | 1.07 | 22   | 1.41   | 33   | 1.5    |   |
| 5537 | Tmem179b     | 1.07 | 52   | 20.55  | 85   | 21.95  |   |
| 5538 | Sh3tc2       | 1.07 | 307  | 13.29  | 492  | 14.19  |   |
| 5539 | Shmt2        | 1.07 | 119  | 19.19  | 163  | 20.48  |   |
| 5540 | Prpf38b      | 1.07 | 133  | 12.22  | 198  | 13.04  |   |
| 5541 | Aplp2        | 1.07 | 1263 | 124.54 | 1809 | 132.87 |   |
| 5542 | Snx33        | 1.07 | 393  | 35.02  | 598  | 37.36  |   |
| 5543 | Dctn2        | 1.07 | 443  | 72.34  | 661  | 77.16  |   |
| 5544 | Nrf1         | 1.07 | 124  | 7.73   | 216  | 8.24   |   |
| 5545 | Ncoa1        | 1.07 | 284  | 11.16  | 420  | 11.91  |   |
| 5546 | Limk2        | 1.07 | 107  | 6.15   | 129  | 6.56   |   |
| 5547 | Mdm4         | 1.07 | 203  | 12.98  | 305  | 13.84  |   |
| 5548 | Txnrd2       | 1.07 | 111  | 11.19  | 163  | 11.93  |   |
| 5549 | Angel2       | 1.07 | 122  | 11.05  | 169  | 11.78  |   |

Supplemental Table 3  
 FSH + Ad-E versus FSH + Ad-FOXO1(A3), 24 hours

|      | A          | B    | C    | D      | E    | F      | G |
|------|------------|------|------|--------|------|--------|---|
| 5550 | Epg5       | 1.07 | 211  | 7.28   | 286  | 7.76   |   |
| 5551 | Pigu       | 1.07 | 233  | 18.99  | 363  | 20.25  |   |
| 5552 | Skp1       | 1.07 | 443  | 101.83 | 644  | 108.56 |   |
| 5553 | Usp42      | 1.07 | 100  | 6.36   | 145  | 6.78   |   |
| 5554 | Rab10      | 1.07 | 357  | 38.57  | 542  | 41.11  |   |
| 5555 | Sec24c     | 1.07 | 372  | 28.48  | 529  | 30.35  |   |
| 5556 | Yars       | 1.07 | 108  | 12.95  | 153  | 13.8   |   |
| 5557 | Brd8       | 1.07 | 1240 | 90.89  | 1746 | 96.84  |   |
| 5558 | Zfp692     | 1.07 | 62   | 6.6    | 72   | 7.03   |   |
| 5559 | Jam2       | 1.07 | 33   | 7.39   | 46   | 7.88   |   |
| 5560 | Kifc3      | 1.07 | 41   | 4.35   | 70   | 4.64   |   |
| 5561 | Btrc       | 1.07 | 350  | 11.57  | 507  | 12.33  |   |
| 5562 | Fhdc1      | 1.07 | 173  | 13.49  | 249  | 14.36  |   |
| 5563 | Cpsf2      | 1.07 | 271  | 16.37  | 400  | 17.44  |   |
| 5564 | Tbl1x      | 1.07 | 480  | 29.38  | 695  | 31.29  |   |
| 5565 | Pdpm       | 1.06 | 69   | 12.9   | 99   | 13.74  |   |
| 5566 | RGD1311847 | 1.06 | 52   | 5.19   | 76   | 5.53   |   |
| 5567 | Ttc26      | 1.06 | 65   | 3.67   | 80   | 3.91   |   |
| 5568 | Rnf20      | 1.06 | 194  | 14.71  | 275  | 15.65  |   |
| 5569 | Cyp20a1    | 1.06 | 83   | 10.77  | 132  | 11.46  |   |
| 5570 | Nab1       | 1.06 | 73   | 4.72   | 120  | 5.03   |   |
| 5571 | Akr1b1     | 1.06 | 3236 | 955.5  | 4567 | 1017   |   |
| 5572 | Nynrin     | 1.06 | 122  | 7.22   | 178  | 7.69   |   |
| 5573 | Ikbkap     | 1.06 | 207  | 14.76  | 281  | 15.71  |   |
| 5574 | Mut        | 1.06 | 74   | 6.67   | 94   | 7.1    |   |
| 5575 | Nme1       | 1.06 | 29   | 12.79  | 42   | 13.61  |   |
| 5576 | Ung        | 1.06 | 64   | 10.05  | 91   | 10.69  |   |
| 5577 | Dgkd       | 1.06 | 129  | 10     | 197  | 10.64  |   |
| 5578 | Rad18      | 1.06 | 34   | 3.82   | 71   | 4.06   |   |
| 5579 | Sntb2      | 1.06 | 74   | 5.54   | 100  | 5.9    |   |
| 5580 | Zfp319     | 1.06 | 60   | 8.37   | 79   | 8.91   |   |
| 5581 | Slc39a9    | 1.06 | 258  | 16.62  | 378  | 17.68  |   |
| 5582 | Kdm5b      | 1.06 | 540  | 27.36  | 782  | 29.11  |   |
| 5583 | Klhl9      | 1.06 | 274  | 25.18  | 410  | 26.78  |   |
| 5584 | Trim35     | 1.06 | 680  | 52.23  | 1025 | 55.55  |   |
| 5585 | Mbnl2      | 1.06 | 1117 | 56.72  | 1757 | 60.32  |   |
| 5586 | Rsrp1      | 1.06 | 381  | 47.75  | 550  | 50.78  |   |
| 5587 | Prkag2     | 1.06 | 182  | 10.35  | 332  | 11     |   |
| 5588 | Chuk       | 1.06 | 125  | 7.6    | 180  | 8.08   |   |
| 5589 | Ccm2       | 1.06 | 167  | 19.84  | 244  | 21.09  |   |
| 5590 | Sh2b1      | 1.06 | 154  | 15.08  | 218  | 16.03  |   |
| 5591 | Cwc22      | 1.06 | 75   | 8.83   | 105  | 9.38   |   |
| 5592 | RGD1308706 | 1.06 | 116  | 15.95  | 187  | 16.95  |   |
| 5593 | Cecr2      | 1.06 | 61   | 3.04   | 93   | 3.23   |   |
| 5594 | Cep70      | 1.06 | 35   | 2.36   | 63   | 2.5    |   |
| 5595 | Deptor     | 1.06 | 194  | 22.06  | 312  | 23.44  |   |
| 5596 | Eif3m      | 1.06 | 203  | 52.96  | 288  | 56.26  |   |
| 5597 | Inpp4a     | 1.06 | 108  | 6.06   | 206  | 6.44   |   |
| 5598 | Mettl4     | 1.06 | 22   | 1.92   | 30   | 2.04   |   |
| 5599 | Mlh3       | 1.06 | 50   | 2.5    | 72   | 2.65   |   |
| 5600 | PVR        | 1.06 | 47   | 6.36   | 80   | 6.75   |   |
| 5601 | Sirpa      | 1.06 | 22   | 1.71   | 30   | 1.81   |   |
| 5602 | Sypl1      | 1.06 | 99   | 17.56  | 126  | 18.66  |   |
| 5603 | Kdsr       | 1.06 | 66   | 6.4    | 104  | 6.8    |   |



Supplemental Table 3  
 FSH + Ad-E versus FSH + Ad-FOXO1(A3), 24 hours

|      | A              | B    | C    | D      | E    | F      | G |
|------|----------------|------|------|--------|------|--------|---|
| 5604 | Riok3          | 1.06 | 530  | 30.43  | 811  | 32.33  |   |
| 5605 | Ssbp1          | 1.06 | 36   | 9.48   | 50   | 10.07  |   |
| 5606 | Mapk6          | 1.06 | 218  | 17.53  | 317  | 18.62  |   |
| 5607 | Sf3b1          | 1.06 | 988  | 63.58  | 1411 | 67.54  |   |
| 5608 | Cct7           | 1.06 | 355  | 61.32  | 507  | 65.11  |   |
| 5609 | Med12          | 1.06 | 126  | 7.6    | 156  | 8.07   |   |
| 5610 | Bhlhe40        | 1.06 | 122  | 18.13  | 175  | 19.25  |   |
| 5611 | Polr2g         | 1.06 | 105  | 39.48  | 148  | 41.92  |   |
| 5612 | Rfwd2          | 1.06 | 201  | 15.96  | 309  | 16.95  |   |
| 5613 | Slc30a9        | 1.06 | 222  | 25.3   | 324  | 26.86  |   |
| 5614 | Dhx29          | 1.06 | 123  | 8.94   | 184  | 9.49   |   |
| 5615 | Tnfrsf21       | 1.06 | 35   | 2.58   | 50   | 2.74   |   |
| 5616 | Wdr3           | 1.06 | 110  | 9.84   | 145  | 10.44  |   |
| 5617 | Med6           | 1.06 | 43   | 10.34  | 51   | 10.97  |   |
| 5618 | Nptn           | 1.06 | 215  | 28.62  | 317  | 30.37  |   |
| 5619 | Rn60_14_1002.4 | 1.06 | 10   | 7.24   | 15   | 7.68   |   |
| 5620 | Fabp5          | 1.06 | 30   | 15.52  | 44   | 16.47  |   |
| 5621 | Acss2          | 1.06 | 192  | 21.09  | 279  | 22.38  |   |
| 5622 | Ywhaz          | 1.06 | 820  | 120.99 | 1172 | 128.37 |   |
| 5623 | Ube2h          | 1.06 | 1298 | 83.73  | 1909 | 88.83  |   |
| 5624 | Golga5         | 1.06 | 104  | 10.42  | 151  | 11.05  |   |
| 5625 | Tmpo           | 1.06 | 985  | 47.03  | 1540 | 49.88  |   |
| 5626 | Ankrd26        | 1.06 | 63   | 2.29   | 80   | 2.43   |   |
| 5627 | Blmh           | 1.06 | 156  | 17.98  | 239  | 19.07  |   |
| 5628 | Sugp2          | 1.06 | 67   | 3.63   | 82   | 3.85   |   |
| 5629 | Kdm2a          | 1.06 | 557  | 26.8   | 808  | 28.41  |   |
| 5630 | Prdx4          | 1.06 | 195  | 75.45  | 276  | 79.98  |   |
| 5631 | Eif4g3         | 1.06 | 459  | 22.8   | 622  | 24.16  |   |
| 5632 | Pvrl2          | 1.06 | 246  | 24.41  | 355  | 25.86  |   |
| 5633 | Slc45a4        | 1.06 | 132  | 14.14  | 184  | 14.98  |   |
| 5634 | Fyco1          | 1.06 | 190  | 6.38   | 252  | 6.76   |   |
| 5635 | Usp8           | 1.06 | 311  | 24.14  | 478  | 25.57  |   |
| 5636 | Prpf4b         | 1.06 | 340  | 24.07  | 484  | 25.5   |   |
| 5637 | AABR07051947.1 | 1.06 | 17   | 10.97  | 23   | 11.62  |   |
| 5638 | AABR07069227.1 | 1.06 | 13   | 2.95   | 18   | 3.12   |   |
| 5639 | Brf2           | 1.06 | 58   | 9.43   | 77   | 9.99   |   |
| 5640 | Cptp           | 1.06 | 12   | 2.2    | 18   | 2.33   |   |
| 5641 | Erc5           | 1.06 | 98   | 6.02   | 135  | 6.38   |   |
| 5642 | Exosc2         | 1.06 | 44   | 6.94   | 57   | 7.35   |   |
| 5643 | Fam151b        | 1.06 | 36   | 3.18   | 53   | 3.37   |   |
| 5644 | Hsf1           | 1.06 | 84   | 9      | 127  | 9.53   |   |
| 5645 | LOC100910122   | 1.06 | 0    | 7.15   | 0    | 7.57   |   |
| 5646 | Lzts3          | 1.06 | 15   | 1.74   | 26   | 1.84   |   |
| 5647 | Rabif          | 1.06 | 23   | 7.3    | 21   | 7.73   |   |
| 5648 | Sdk1           | 1.06 | 41   | 0.65   | 57   | 0.69   |   |
| 5649 | Sec22c         | 1.06 | 21   | 4.78   | 38   | 5.06   |   |
| 5650 | Uimc1          | 1.06 | 183  | 12     | 227  | 12.71  |   |
| 5651 | Utp3           | 1.06 | 59   | 13.14  | 84   | 13.92  |   |
| 5652 | Wdyhv1         | 1.06 | 26   | 2.6    | 43   | 2.76   |   |
| 5653 | Zfp770         | 1.06 | 12   | 1.8    | 17   | 1.91   |   |
| 5654 | Rltpr          | 1.06 | 14   | 0.62   | 17   | 0.66   |   |
| 5655 | Wdr76          | 1.06 | 24   | 2.32   | 43   | 2.46   |   |
| 5656 | Tab1           | 1.06 | 140  | 13.7   | 194  | 14.5   |   |
| 5657 | Tmem57         | 1.06 | 120  | 10.71  | 186  | 11.34  |   |

Supplemental Table 3  
 FSH + Ad-E versus FSH + Ad-FOXO1(A3), 24 hours

|      | A                | B    | C    | D      | E    | F      | G |
|------|------------------|------|------|--------|------|--------|---|
| 5658 | Eri1             | 1.06 | 72   | 8.2    | 97   | 8.68   |   |
| 5659 | Rabac1           | 1.06 | 89   | 26.84  | 118  | 28.4   |   |
| 5660 | Rbbp8            | 1.06 | 146  | 10.87  | 206  | 11.5   |   |
| 5661 | Tubgcp4          | 1.06 | 79   | 8.02   | 129  | 8.48   |   |
| 5662 | Wdr37            | 1.06 | 141  | 8.81   | 201  | 9.32   |   |
| 5663 | LOC100912375     | 1.06 | 0    | 16.19  | 0    | 17.13  |   |
| 5664 | Larp1            | 1.06 | 342  | 33.5   | 499  | 35.43  |   |
| 5665 | Ezh2             | 1.06 | 126  | 10.63  | 185  | 11.24  |   |
| 5666 | Mrpl28           | 1.06 | 43   | 19.18  | 67   | 20.28  |   |
| 5667 | Rprd2            | 1.06 | 229  | 14.71  | 322  | 15.55  |   |
| 5668 | Dennd2a          | 1.06 | 166  | 8.32   | 250  | 8.8    |   |
| 5669 | Tsen15           | 1.06 | 32   | 9.27   | 48   | 9.8    |   |
| 5670 | Alg13            | 1.06 | 36   | 1.89   | 47   | 2      |   |
| 5671 | Cd3eap           | 1.06 | 29   | 5.15   | 43   | 5.44   |   |
| 5672 | Cyp27a1          | 1.06 | 114  | 13.84  | 170  | 14.63  |   |
| 5673 | Saa4             | 1.06 | 47   | 1.52   | 57   | 1.61   |   |
| 5674 | Lysmd3           | 1.06 | 47   | 5.27   | 69   | 5.56   |   |
| 5675 | Pik3cb           | 1.06 | 56   | 3.45   | 73   | 3.64   |   |
| 5676 | Ralgapa1         | 1.06 | 358  | 14.99  | 517  | 15.83  |   |
| 5677 | Plin3            | 1.06 | 466  | 107.22 | 651  | 113.25 |   |
| 5678 | Zeb1             | 1.06 | 96   | 6.71   | 121  | 7.09   |   |
| 5679 | Jmjd1c           | 1.06 | 558  | 17.84  | 762  | 18.84  |   |
| 5680 | Ube2l3           | 1.06 | 396  | 56.7   | 586  | 59.88  |   |
| 5681 | Psmc6            | 1.06 | 171  | 21.76  | 238  | 22.98  |   |
| 5682 | Jun              | 1.06 | 303  | 35.52  | 428  | 37.51  |   |
| 5683 | Rps18            | 1.06 | 18   | 267.58 | 37   | 282.56 |   |
| 5684 | Nedd4            | 1.06 | 4515 | 283.12 | 6482 | 298.96 |   |
| 5685 | Dlg5             | 1.06 | 216  | 11.25  | 315  | 11.88  |   |
| 5686 | Arhgap11a        | 1.06 | 36   | 2.95   | 48   | 3.12   |   |
| 5687 | Mkrr1            | 1.06 | 104  | 10.03  | 160  | 10.59  |   |
| 5688 | Phyhd1           | 1.06 | 28   | 4.88   | 31   | 5.15   |   |
| 5689 | Rev1             | 1.06 | 173  | 9.53   | 225  | 10.06  |   |
| 5690 | Rrp12            | 1.06 | 77   | 5.65   | 104  | 5.97   |   |
| 5691 | Vti1a            | 1.06 | 75   | 2.26   | 120  | 2.38   |   |
| 5692 | Zbtb40           | 1.06 | 52   | 3.07   | 80   | 3.24   |   |
| 5693 | Zfp821           | 1.06 | 147  | 12.72  | 249  | 13.43  |   |
| 5694 | Crbn             | 1.06 | 61   | 8.18   | 70   | 8.64   |   |
| 5695 | Eef1b2           | 1.06 | 316  | 122.83 | 460  | 129.62 |   |
| 5696 | Pafah1b1         | 1.06 | 618  | 41.16  | 884  | 43.43  |   |
| 5697 | Map1a            | 1.06 | 409  | 13.29  | 580  | 14.02  |   |
| 5698 | Fbxo28           | 1.05 | 141  | 17.66  | 204  | 18.62  |   |
| 5699 | B4galt7          | 1.05 | 86   | 15.24  | 117  | 16.08  |   |
| 5700 | Tollip           | 1.05 | 156  | 14.35  | 228  | 15.14  |   |
| 5701 | Edem1            | 1.05 | 201  | 23.47  | 290  | 24.75  |   |
| 5702 | Cdk12            | 1.05 | 204  | 8.32   | 273  | 8.77   |   |
| 5703 | Mt-nd5           | 1.05 | 3024 | 631.74 | 4306 | 666.08 |   |
| 5704 | Ccdc117          | 1.05 | 44   | 6.42   | 63   | 6.77   |   |
| 5705 | ENSRNOG000000059 | 1.05 | 119  | 9.62   | 177  | 10.14  |   |
| 5706 | Zfp41            | 1.05 | 88   | 8.18   | 128  | 8.62   |   |
| 5707 | Btg3             | 1.05 | 74   | 16.71  | 108  | 17.61  |   |
| 5708 | Bgn              | 1.05 | 189  | 28.06  | 263  | 29.57  |   |
| 5709 | Anxa6            | 1.05 | 542  | 64.69  | 763  | 68.16  |   |
| 5710 | C2cd5            | 1.05 | 75   | 3.46   | 115  | 3.65   |   |
| 5711 | Dedd2            | 1.05 | 28   | 3.58   | 32   | 3.77   |   |

Supplemental Table 3  
 FSH + Ad-E versus FSH + Ad-FOXO1(A3), 24 hours

|      | A              | B    | C    | D       | E    | F      | G |
|------|----------------|------|------|---------|------|--------|---|
| 5712 | Nat9           | 1.05 | 45   | 12.11   | 68   | 12.75  |   |
| 5713 | Syt1           | 1.05 | 89   | 1.78    | 133  | 1.87   |   |
| 5714 | Capzb          | 1.05 | 334  | 54.16   | 506  | 57.04  |   |
| 5715 | Csde1          | 1.05 | 190  | 70.61   | 253  | 74.35  |   |
| 5716 | Clic1          | 1.05 | 190  | 59.01   | 255  | 62.13  |   |
| 5717 | Dhx57          | 1.05 | 179  | 9.86    | 251  | 10.38  |   |
| 5718 | Il4r           | 1.05 | 316  | 28.16   | 411  | 29.65  |   |
| 5719 | Tox4           | 1.05 | 251  | 25.36   | 349  | 26.69  |   |
| 5720 | Gpn2           | 1.05 | 32   | 7.75    | 51   | 8.15   |   |
| 5721 | Ap5b1          | 1.05 | 26   | 2.73    | 39   | 2.87   |   |
| 5722 | Tars           | 1.05 | 150  | 16.41   | 202  | 17.26  |   |
| 5723 | Wsb2           | 1.05 | 265  | 60.5    | 371  | 63.65  |   |
| 5724 | Btg1           | 1.05 | 210  | 51.76   | 294  | 54.43  |   |
| 5725 | Zfp958         | 1.05 | 31   | 8.32    | 32   | 8.75   |   |
| 5726 | Bcl7b          | 1.05 | 56   | 7.17    | 95   | 7.53   |   |
| 5727 | Prmt6          | 1.05 | 32   | 3.5     | 30   | 3.68   |   |
| 5728 | Ddx5           | 1.05 | 1508 | 174.95  | 2130 | 183.91 |   |
| 5729 | Gosr1          | 1.05 | 213  | 14      | 306  | 14.72  |   |
| 5730 | Xiap           | 1.05 | 82   | 9.76    | 124  | 10.26  |   |
| 5731 | Cnot4          | 1.05 | 154  | 7.71    | 229  | 8.11   |   |
| 5732 | Cse1l          | 1.05 | 248  | 22.93   | 337  | 24.09  |   |
| 5733 | Arfgap2        | 1.05 | 330  | 40.8    | 472  | 42.86  |   |
| 5734 | Ets2           | 1.05 | 46   | 4.21    | 60   | 4.42   |   |
| 5735 | Pygo1          | 1.05 | 61   | 4.4     | 99   | 4.62   |   |
| 5736 | Snx5           | 1.05 | 121  | 14.52   | 151  | 15.25  |   |
| 5737 | Trmt10a        | 1.05 | 55   | 3.9     | 79   | 4.09   |   |
| 5738 | Wbp1l          | 1.05 | 529  | 34.2    | 776  | 35.92  |   |
| 5739 | Zfp191         | 1.05 | 88   | 20.73   | 121  | 21.77  |   |
| 5740 | Zfp281         | 1.05 | 132  | 15.54   | 186  | 16.31  |   |
| 5741 | Casc4          | 1.05 | 189  | 13.71   | 267  | 14.39  |   |
| 5742 | Rbm27          | 1.05 | 120  | 10.05   | 180  | 10.55  |   |
| 5743 | Commd9         | 1.05 | 82   | 17.67   | 101  | 18.54  |   |
| 5744 | Nup214         | 1.05 | 358  | 18.75   | 530  | 19.67  |   |
| 5745 | Vegfa          | 1.05 | 279  | 24.3    | 401  | 25.5   |   |
| 5746 | Pelp1          | 1.05 | 204  | 19.54   | 287  | 20.5   |   |
| 5747 | Tspan31        | 1.05 | 233  | 42.94   | 324  | 45.02  |   |
| 5748 | Ube2k          | 1.05 | 244  | 11.95   | 378  | 12.52  |   |
| 5749 | Twf1           | 1.05 | 163  | 21.92   | 215  | 22.98  |   |
| 5750 | Usp34          | 1.05 | 526  | 17.52   | 764  | 18.37  |   |
| 5751 | Sema3c         | 1.05 | 537  | 33.85   | 800  | 35.48  |   |
| 5752 | Nup155         | 1.05 | 111  | 8.38    | 164  | 8.78   |   |
| 5753 | Eef1a1         | 1.05 | 1825 | 1919.04 | 1713 | 2011.2 |   |
| 5754 | Adnp2          | 1.05 | 154  | 11.91   | 200  | 12.48  |   |
| 5755 | Metap1         | 1.05 | 163  | 18.13   | 216  | 19     |   |
| 5756 | Rtcb           | 1.05 | 139  | 35.13   | 190  | 36.79  |   |
| 5757 | Tor1aip2_2     | 1.05 | 186  | 34.86   | 303  | 36.51  |   |
| 5758 | Cd9            | 1.05 | 416  | 117.72  | 592  | 123.26 |   |
| 5759 | Copb1          | 1.05 | 480  | 49.66   | 676  | 51.99  |   |
| 5760 | Kptn           | 1.05 | 54   | 8.56    | 75   | 8.96   |   |
| 5761 | AABR07068163.1 | 1.05 | 9    | 1.9     | 15   | 1.98   |   |
| 5762 | Arid3b         | 1.05 | 18   | 0.44    | 26   | 0.46   |   |
| 5763 | Btbd1          | 1.05 | 358  | 35.56   | 518  | 37.22  |   |
| 5764 | Casp8          | 1.05 | 30   | 3.57    | 45   | 3.74   |   |
| 5765 | Ccbl2          | 1.05 | 10   | 1.33    | 22   | 1.39   |   |

Supplemental Table 3  
 FSH + Ad-E versus FSH + Ad-FOXO1(A3), 24 hours

|      | A            | B    | C   | D     | E   | F     | G |
|------|--------------|------|-----|-------|-----|-------|---|
| 5766 | Cdca2        | 1.05 | 26  | 1.99  | 33  | 2.08  |   |
| 5767 | Cp           | 1.05 | 28  | 2.39  | 42  | 2.5   |   |
| 5768 | Crem         | 1.05 | 72  | 3.11  | 107 | 3.25  |   |
| 5769 | Cxcl12       | 1.05 | 15  | 0.33  | 12  | 0.35  |   |
| 5770 | Ecel1        | 1.05 | 10  | 0.49  | 14  | 0.52  |   |
| 5771 | Entpd5       | 1.05 | 100 | 6.12  | 130 | 6.4   |   |
| 5772 | Fat3         | 1.05 | 16  | 0.13  | 19  | 0.14  |   |
| 5773 | Gabarapl2    | 1.05 | 118 | 31.84 | 165 | 33.33 |   |
| 5774 | Git2         | 1.05 | 271 | 20.87 | 371 | 21.84 |   |
| 5775 | Gmip         | 1.05 | 51  | 3.7   | 68  | 3.88  |   |
| 5776 | Irgm         | 1.05 | 9   | 0.8   | 12  | 0.84  |   |
| 5777 | Itgae        | 1.05 | 84  | 1.37  | 89  | 1.44  |   |
| 5778 | Irgb3bp      | 1.05 | 42  | 2.49  | 46  | 2.61  |   |
| 5779 | Kcnj14       | 1.05 | 5   | 0.66  | 7   | 0.69  |   |
| 5780 | Kihl14       | 1.05 | 18  | 0.89  | 25  | 0.93  |   |
| 5781 | LOC100910414 | 1.05 | 0   | 9.69  | 0   | 10.14 |   |
| 5782 | LOC100911516 | 1.05 | 0   | 13.23 | 0   | 13.85 |   |
| 5783 | LOC100912571 | 1.05 | 0   | 3.41  | 0   | 3.57  |   |
| 5784 | Lrrc8e       | 1.05 | 33  | 3.62  | 48  | 3.79  |   |
| 5785 | Mak16        | 1.05 | 40  | 7.43  | 49  | 7.77  |   |
| 5786 | Map2k1       | 1.05 | 158 | 22.58 | 227 | 23.64 |   |
| 5787 | Mlxipl       | 1.05 | 7   | 0.55  | 9   | 0.57  |   |
| 5788 | Ndufaf2      | 1.05 | 21  | 1.7   | 47  | 1.78  |   |
| 5789 | Neurl2       | 1.05 | 7   | 1.24  | 12  | 1.3   |   |
| 5790 | Nt5dc1       | 1.05 | 71  | 4.72  | 116 | 4.94  |   |
| 5791 | Nxt2         | 1.05 | 6   | 0.74  | 7   | 0.77  |   |
| 5792 | Otud7a       | 1.05 | 10  | 0.81  | 19  | 0.85  |   |
| 5793 | Pcdhb8       | 1.05 | 4   | 0.77  | 7   | 0.81  |   |
| 5794 | Pcdhga11     | 1.05 | 15  | 2.24  | 21  | 2.34  |   |
| 5795 | Pcdhga7      | 1.05 | 40  | 5.96  | 56  | 6.24  |   |
| 5796 | Rab14        | 1.05 | 150 | 33.7  | 238 | 35.27 |   |
| 5797 | RGD1305014   | 1.05 | 17  | 1.75  | 26  | 1.83  |   |
| 5798 | RGD1562747   | 1.05 | 27  | 2.94  | 36  | 3.08  |   |
| 5799 | Susd3        | 1.05 | 6   | 1.42  | 8   | 1.48  |   |
| 5800 | Tmco4        | 1.05 | 32  | 1.6   | 37  | 1.68  |   |
| 5801 | Tmem120b     | 1.05 | 15  | 2.26  | 23  | 2.36  |   |
| 5802 | Tmem151a     | 1.05 | 28  | 1.46  | 29  | 1.53  |   |
| 5803 | Trim11       | 1.05 | 80  | 7.79  | 131 | 8.16  |   |
| 5804 | U2af1        | 1.05 | 166 | 26.65 | 269 | 27.89 |   |
| 5805 | Zfp664       | 1.05 | 9   | 13.82 | 7   | 14.46 |   |
| 5806 | Zfp872       | 1.05 | 12  | 1.3   | 10  | 1.36  |   |
| 5807 | Dmpk         | 1.05 | 48  | 2.61  | 81  | 2.73  |   |
| 5808 | Fastkd3      | 1.05 | 49  | 5.6   | 73  | 5.87  |   |
| 5809 | Fh           | 1.05 | 101 | 20.53 | 143 | 21.49 |   |
| 5810 | Hist1h2bk    | 1.05 | 4   | 4.75  | 7   | 4.97  |   |
| 5811 | Ift81        | 1.05 | 72  | 8.03  | 97  | 8.41  |   |
| 5812 | Naa11        | 1.05 | 5   | 0.56  | 8   | 0.59  |   |
| 5813 | Qtrtd1       | 1.05 | 16  | 2.89  | 29  | 3.03  |   |
| 5814 | SNORD28      | 1.05 | 5   | 23.21 | 7   | 24.29 |   |
| 5815 | Spin2a       | 1.05 | 12  | 9.48  | 19  | 9.92  |   |
| 5816 | Tex14        | 1.05 | 104 | 0.38  | 160 | 0.4   |   |
| 5817 | Tmem246      | 1.05 | 182 | 37.84 | 259 | 39.61 |   |
| 5818 | Slc39a10     | 1.05 | 588 | 41.29 | 821 | 43.18 |   |
| 5819 | Lonp2        | 1.05 | 240 | 15.64 | 371 | 16.35 |   |

Supplemental Table 3  
 FSH + Ad-E versus FSH + Ad-FOXO1(A3), 24 hours

|      | A              | B    | C    | D      | E    | F      | G |
|------|----------------|------|------|--------|------|--------|---|
| 5820 | Osbpl5         | 1.05 | 365  | 25.94  | 517  | 27.13  |   |
| 5821 | Wash1          | 1.05 | 126  | 23.36  | 175  | 24.42  |   |
| 5822 | Atic           | 1.05 | 215  | 30.03  | 301  | 31.38  |   |
| 5823 | Tbce           | 1.05 | 203  | 16.03  | 280  | 16.75  |   |
| 5824 | Pafah1b2       | 1.05 | 208  | 34.38  | 300  | 35.93  |   |
| 5825 | Cdk2           | 1.04 | 104  | 14.53  | 166  | 15.18  |   |
| 5826 | Gsk3b          | 1.04 | 222  | 28.59  | 348  | 29.87  |   |
| 5827 | Azi2           | 1.04 | 130  | 13.57  | 186  | 14.18  |   |
| 5828 | Rcor1_1        | 1.04 | 70   | 25.65  | 107  | 26.8   |   |
| 5829 | Dnajc3         | 1.04 | 165  | 30.75  | 230  | 32.12  |   |
| 5830 | Mkxn2          | 1.04 | 89   | 11.97  | 125  | 12.5   |   |
| 5831 | Mettl3         | 1.04 | 204  | 23.91  | 308  | 24.97  |   |
| 5832 | RGD621098      | 1.04 | 107  | 9.79   | 141  | 10.22  |   |
| 5833 | Nufip2         | 1.04 | 111  | 21.1   | 155  | 22.04  |   |
| 5834 | Mxd1           | 1.04 | 64   | 4.23   | 96   | 4.42   |   |
| 5835 | Tyw1           | 1.04 | 61   | 7.09   | 79   | 7.4    |   |
| 5836 | Cldnd1         | 1.04 | 218  | 38.26  | 303  | 39.94  |   |
| 5837 | Mvb12a         | 1.04 | 108  | 32.36  | 151  | 33.77  |   |
| 5838 | LOC100362640   | 1.04 | 5    | 270.77 | 10   | 282.56 |   |
| 5839 | Zc3h14         | 1.04 | 231  | 17.34  | 329  | 18.1   |   |
| 5840 | Prpf19         | 1.04 | 556  | 94.37  | 780  | 98.47  |   |
| 5841 | Gid4           | 1.04 | 98   | 7.47   | 139  | 7.79   |   |
| 5842 | Tada2a         | 1.04 | 92   | 7.41   | 109  | 7.73   |   |
| 5843 | Trappc12       | 1.04 | 169  | 17.1   | 244  | 17.84  |   |
| 5844 | Atp6v1h        | 1.04 | 137  | 19.89  | 205  | 20.74  |   |
| 5845 | Zgpat          | 1.04 | 41   | 6.97   | 59   | 7.27   |   |
| 5846 | Sar1a          | 1.04 | 557  | 42.27  | 751  | 44.07  |   |
| 5847 | Ii13ra1        | 1.04 | 14   | 20.07  | 21   | 20.92  |   |
| 5848 | Sdccag3        | 1.04 | 205  | 22.89  | 300  | 23.85  |   |
| 5849 | Atp6v1e1       | 1.04 | 182  | 39.44  | 293  | 41.08  |   |
| 5850 | Cnih4          | 1.04 | 176  | 31.53  | 263  | 32.84  |   |
| 5851 | Polg           | 1.04 | 149  | 12.97  | 214  | 13.51  |   |
| 5852 | Hdac8          | 1.04 | 103  | 5.16   | 146  | 5.37   |   |
| 5853 | Mtif3          | 1.04 | 45   | 6.5    | 70   | 6.77   |   |
| 5854 | Trps1          | 1.04 | 53   | 2.21   | 72   | 2.31   |   |
| 5855 | Diexf          | 1.04 | 75   | 6.8    | 116  | 7.08   |   |
| 5856 | RGD1306954     | 1.04 | 47   | 8.4    | 52   | 8.75   |   |
| 5857 | Trim27         | 1.04 | 162  | 24.41  | 218  | 25.41  |   |
| 5858 | Msl1           | 1.04 | 205  | 20.74  | 294  | 21.59  |   |
| 5859 | Ttc7b          | 1.04 | 282  | 24.43  | 460  | 25.43  |   |
| 5860 | Tmem87b        | 1.04 | 151  | 9.41   | 218  | 9.79   |   |
| 5861 | AABR07035107.1 | 1.04 | 43   | 11.94  | 48   | 12.42  |   |
| 5862 | Gtf2e2         | 1.04 | 72   | 11.07  | 101  | 11.51  |   |
| 5863 | Zfp287         | 1.04 | 25   | 3.64   | 36   | 3.78   |   |
| 5864 | Cul2           | 1.04 | 139  | 8.38   | 191  | 8.71   |   |
| 5865 | St6galnac4     | 1.04 | 105  | 10.62  | 135  | 11.04  |   |
| 5866 | Cic            | 1.04 | 287  | 18.61  | 405  | 19.35  |   |
| 5867 | Fam91a1        | 1.04 | 312  | 18.57  | 415  | 19.31  |   |
| 5868 | Nars           | 1.04 | 200  | 26.66  | 281  | 27.71  |   |
| 5869 | Marveld1       | 1.04 | 174  | 22.07  | 240  | 22.95  |   |
| 5870 | Tpp1           | 1.04 | 365  | 52.18  | 513  | 54.25  |   |
| 5871 | Hspa13         | 1.04 | 190  | 16.16  | 266  | 16.79  |   |
| 5872 | Dync1h1        | 1.04 | 1954 | 49.23  | 2584 | 51.17  |   |
| 5873 | Amdhd2         | 1.04 | 55   | 10.08  | 76   | 10.48  |   |

Supplemental Table 3  
 FSH + Ad-E versus FSH + Ad-FOXO1(A3), 24 hours

|      | A              | B    | C   | D     | E    | F     | G |
|------|----------------|------|-----|-------|------|-------|---|
| 5874 | Dcun1d4        | 1.04 | 89  | 5.01  | 121  | 5.2   |   |
| 5875 | Ythdf1         | 1.04 | 265 | 27.75 | 377  | 28.84 |   |
| 5876 | Dvl3           | 1.04 | 352 | 26.17 | 490  | 27.18 |   |
| 5877 | Atg2a          | 1.04 | 196 | 10.57 | 265  | 10.97 |   |
| 5878 | Ahsa1          | 1.04 | 127 | 32.8  | 186  | 34.06 |   |
| 5879 | Gstm4          | 1.04 | 54  | 7.47  | 65   | 7.76  |   |
| 5880 | Gtf2h3         | 1.04 | 46  | 6.19  | 61   | 6.42  |   |
| 5881 | Lztf11         | 1.04 | 22  | 4.54  | 28   | 4.72  |   |
| 5882 | Atg12          | 1.04 | 191 | 25.4  | 270  | 26.37 |   |
| 5883 | Coil           | 1.04 | 36  | 2.5   | 50   | 2.6   |   |
| 5884 | Gtf2h4         | 1.04 | 38  | 6.79  | 53   | 7.05  |   |
| 5885 | Sugp1          | 1.04 | 121 | 12.56 | 171  | 13.04 |   |
| 5886 | Smarca5        | 1.04 | 120 | 14.77 | 183  | 15.33 |   |
| 5887 | Zwint          | 1.04 | 343 | 60.11 | 489  | 62.39 |   |
| 5888 | Hdac2          | 1.04 | 303 | 46.71 | 444  | 48.47 |   |
| 5889 | Phldb2         | 1.04 | 243 | 15.17 | 339  | 15.75 |   |
| 5890 | Pole           | 1.04 | 65  | 2.5   | 81   | 2.59  |   |
| 5891 | Taf5l          | 1.04 | 83  | 12.75 | 125  | 13.23 |   |
| 5892 | Zc3h7b         | 1.04 | 574 | 33.92 | 795  | 35.19 |   |
| 5893 | Kctd5          | 1.04 | 91  | 11.71 | 125  | 12.15 |   |
| 5894 | Zkscan3        | 1.04 | 140 | 13.72 | 215  | 14.23 |   |
| 5895 | AABR07044089.1 | 1.04 | 44  | 16.78 | 61   | 17.4  |   |
| 5896 | Ccp110         | 1.04 | 77  | 4.6   | 102  | 4.77  |   |
| 5897 | Ppp1r21        | 1.04 | 80  | 7.2   | 118  | 7.47  |   |
| 5898 | Cox19          | 1.04 | 92  | 8.48  | 143  | 8.79  |   |
| 5899 | Btbd10         | 1.04 | 115 | 11.07 | 154  | 11.48 |   |
| 5900 | Ccnd3          | 1.04 | 78  | 14.21 | 100  | 14.73 |   |
| 5901 | LOC499235      | 1.04 | 137 | 16.16 | 194  | 16.75 |   |
| 5902 | Malt1          | 1.04 | 51  | 3.23  | 80   | 3.35  |   |
| 5903 | Mrpl52         | 1.04 | 112 | 27.3  | 154  | 28.3  |   |
| 5904 | Pex19_1        | 1.04 | 45  | 22.11 | 73   | 22.91 |   |
| 5905 | Eif4b          | 1.04 | 732 | 59.94 | 1022 | 62.12 |   |
| 5906 | Dync1li2       | 1.04 | 336 | 22.04 | 474  | 22.84 |   |
| 5907 | Gtf3c1         | 1.04 | 748 | 34.91 | 1051 | 36.18 |   |
| 5908 | Zbtb9          | 1.04 | 57  | 7.41  | 78   | 7.67  |   |
| 5909 | Ywhab          | 1.04 | 544 | 72.52 | 761  | 75.14 |   |
| 5910 | Atp11a         | 1.04 | 282 | 14.03 | 389  | 14.54 |   |
| 5911 | Capn7          | 1.04 | 122 | 11.16 | 185  | 11.56 |   |
| 5912 | Wsb1           | 1.04 | 820 | 66.91 | 1050 | 69.29 |   |
| 5913 | Nmt1           | 1.04 | 288 | 39.26 | 421  | 40.65 |   |
| 5914 | AABR07004894.1 | 1.04 | 1   | 8.13  | 2    | 8.42  |   |
| 5915 | Ccne2          | 1.04 | 44  | 3.11  | 65   | 3.22  |   |
| 5916 | Fancl          | 1.04 | 26  | 2.85  | 39   | 2.95  |   |
| 5917 | LOC102549726   | 1.04 | 13  | 3.09  | 15   | 3.2   |   |
| 5918 | LOC688708      | 1.04 | 150 | 13.33 | 306  | 13.8  |   |
| 5919 | Luc7l          | 1.04 | 195 | 19.44 | 265  | 20.12 |   |
| 5920 | MacroD1        | 1.04 | 41  | 3.63  | 47   | 3.75  |   |
| 5921 | Med31          | 1.04 | 23  | 4.61  | 33   | 4.77  |   |
| 5922 | Prdx5          | 1.04 | 40  | 17.3  | 59   | 17.91 |   |
| 5923 | Uqcc3          | 1.04 | 31  | 13.64 | 36   | 14.12 |   |
| 5924 | Wrnip1         | 1.04 | 57  | 7.21  | 100  | 7.47  |   |
| 5925 | Cyp4f17        | 1.04 | 41  | 1.92  | 41   | 1.99  |   |
| 5926 | Fancd2         | 1.04 | 56  | 3.24  | 70   | 3.35  |   |
| 5927 | Nt5e           | 1.04 | 78  | 1.5   | 79   | 1.55  |   |

Supplemental Table 3  
 FSH + Ad-E versus FSH + Ad-FOXO1(A3), 24 hours

|      | A           | B    | C    | D      | E    | F      | G |
|------|-------------|------|------|--------|------|--------|---|
| 5928 | Pdcd5       | 1.04 | 0    | 7.16   | 0    | 7.42   |   |
| 5929 | Zfpm1       | 1.04 | 49   | 3.05   | 52   | 3.16   |   |
| 5930 | Lig1        | 1.03 | 15   | 17.91  | 41   | 18.53  |   |
| 5931 | Cops3       | 1.03 | 183  | 30.94  | 262  | 32.01  |   |
| 5932 | Ctbp2       | 1.03 | 134  | 11.83  | 202  | 12.24  |   |
| 5933 | Ss18        | 1.03 | 321  | 29.05  | 462  | 30.06  |   |
| 5934 | Aff2        | 1.03 | 676  | 21.55  | 946  | 22.3   |   |
| 5935 | Chmp5       | 1.03 | 101  | 23.59  | 155  | 24.4   |   |
| 5936 | Alg9        | 1.03 | 96   | 10.18  | 142  | 10.53  |   |
| 5937 | Coasy       | 1.03 | 100  | 13.03  | 117  | 13.47  |   |
| 5938 | Vps26b      | 1.03 | 227  | 22.17  | 322  | 22.94  |   |
| 5939 | Srbd1       | 1.03 | 88   | 4.98   | 119  | 5.15   |   |
| 5940 | Usp31       | 1.03 | 55   | 3.22   | 76   | 3.33   |   |
| 5941 | Erlin1      | 1.03 | 166  | 18.75  | 235  | 19.38  |   |
| 5942 | Vps29       | 1.03 | 111  | 20.35  | 139  | 21.04  |   |
| 5943 | Nfe2l1      | 1.03 | 1475 | 114.84 | 2227 | 118.69 |   |
| 5944 | Ebag9       | 1.03 | 44   | 6.4    | 64   | 6.62   |   |
| 5945 | Hif1an      | 1.03 | 36   | 9.2    | 58   | 9.51   |   |
| 5946 | Pacsin3     | 1.03 | 39   | 6.82   | 54   | 7.04   |   |
| 5947 | Pigh        | 1.03 | 45   | 5.19   | 74   | 5.37   |   |
| 5948 | Pdxdc1      | 1.03 | 204  | 7.45   | 318  | 7.69   |   |
| 5949 | Cdk8        | 1.03 | 66   | 11.01  | 103  | 11.38  |   |
| 5950 | Cldn12      | 1.03 | 57   | 5.72   | 80   | 5.91   |   |
| 5951 | Ube2e1      | 1.03 | 85   | 26.17  | 129  | 27.03  |   |
| 5952 | Pbdc1       | 1.03 | 56   | 12.22  | 79   | 12.63  |   |
| 5953 | Kbtbd2      | 1.03 | 217  | 19.61  | 303  | 20.26  |   |
| 5954 | Atxn1       | 1.03 | 165  | 5.3    | 231  | 5.47   |   |
| 5955 | Zdhhc6      | 1.03 | 115  | 17.89  | 160  | 18.47  |   |
| 5956 | Palb2       | 1.03 | 37   | 2.06   | 46   | 2.12   |   |
| 5957 | Wbp2        | 1.03 | 125  | 51.59  | 170  | 53.25  |   |
| 5958 | Nsa2        | 1.03 | 137  | 41.64  | 150  | 42.97  |   |
| 5959 | Phf2        | 1.03 | 311  | 18.97  | 433  | 19.57  |   |
| 5960 | Sap30bp     | 1.03 | 106  | 9.03   | 147  | 9.32   |   |
| 5961 | Thumpd1     | 1.03 | 80   | 12.62  | 110  | 13.02  |   |
| 5962 | Elmsan1     | 1.03 | 167  | 6.79   | 215  | 7.01   |   |
| 5963 | Abcb7       | 1.03 | 43   | 4.41   | 57   | 4.55   |   |
| 5964 | B3gat3      | 1.03 | 98   | 20.01  | 132  | 20.64  |   |
| 5965 | Blm         | 1.03 | 48   | 2.35   | 57   | 2.42   |   |
| 5966 | Fbxl4       | 1.03 | 55   | 3.22   | 82   | 3.33   |   |
| 5967 | Kdm1a       | 1.03 | 280  | 27.45  | 369  | 28.31  |   |
| 5968 | Phospho2    | 1.03 | 41   | 4.99   | 52   | 5.15   |   |
| 5969 | Slc16a2     | 1.03 | 137  | 12.92  | 192  | 13.32  |   |
| 5970 | Pip5k1a     | 1.03 | 273  | 22     | 362  | 22.68  |   |
| 5971 | Heca        | 1.03 | 99   | 7.17   | 144  | 7.4    |   |
| 5972 | Prr14l      | 1.03 | 261  | 7.77   | 370  | 8.01   |   |
| 5973 | Serbp1      | 1.03 | 251  | 56.65  | 345  | 58.39  |   |
| 5974 | 5S_rRNA_260 | 1.03 | 5    | 112.58 | 8    | 116.01 |   |
| 5975 | Rnf41       | 1.03 | 311  | 34.66  | 465  | 35.72  |   |
| 5976 | Adpgk       | 1.03 | 248  | 28.22  | 348  | 29.07  |   |
| 5977 | Mxd4        | 1.03 | 326  | 25.96  | 465  | 26.74  |   |
| 5978 | Cope        | 1.03 | 200  | 56.38  | 265  | 58.07  |   |
| 5979 | Gpatch2l    | 1.03 | 79   | 5.43   | 88   | 5.59   |   |
| 5980 | lscu        | 1.03 | 56   | 17.63  | 80   | 18.16  |   |
| 5981 | Dsc2        | 1.03 | 99   | 7.78   | 136  | 8.01   |   |

Supplemental Table 3  
 FSH + Ad-E versus FSH + Ad-FOXO1(A3), 24 hours

|      | A            | B    | C    | D      | E    | F      | G |
|------|--------------|------|------|--------|------|--------|---|
| 5982 | Zyg11b       | 1.03 | 102  | 10.44  | 133  | 10.74  |   |
| 5983 | Bin1         | 1.03 | 164  | 12.17  | 187  | 12.53  |   |
| 5984 | Srpk1        | 1.03 | 175  | 20.05  | 237  | 20.63  |   |
| 5985 | Chst11       | 1.03 | 651  | 54.93  | 870  | 56.52  |   |
| 5986 | Rnf44        | 1.03 | 288  | 23.48  | 401  | 24.16  |   |
| 5987 | Gpcpd1       | 1.03 | 232  | 15.9   | 305  | 16.35  |   |
| 5988 | Raf1         | 1.03 | 464  | 45.41  | 659  | 46.71  |   |
| 5989 | Asah2        | 1.03 | 19   | 1.15   | 24   | 1.18   |   |
| 5990 | Ccdc51       | 1.03 | 32   | 3.14   | 36   | 3.22   |   |
| 5991 | LOC687609    | 1.03 | 22   | 1.14   | 31   | 1.18   |   |
| 5992 | Syt13        | 1.03 | 10   | 0.84   | 12   | 0.86   |   |
| 5993 | Atm          | 1.03 | 359  | 4.46   | 547  | 4.58   |   |
| 5994 | Bach1        | 1.03 | 35   | 5.62   | 57   | 5.78   |   |
| 5995 | Dapp1        | 1.03 | 10   | 0.95   | 13   | 0.97   |   |
| 5996 | Dbndd2       | 1.03 | 8    | 2.49   | 11   | 2.56   |   |
| 5997 | Dffa         | 1.03 | 61   | 5.21   | 84   | 5.36   |   |
| 5998 | Dus4l        | 1.03 | 16   | 1.07   | 13   | 1.1    |   |
| 5999 | Fkbp15       | 1.03 | 107  | 7.96   | 150  | 8.18   |   |
| 6000 | Gmfg         | 1.03 | 11   | 5.11   | 17   | 5.25   |   |
| 6001 | Hint3        | 1.03 | 27   | 5.37   | 38   | 5.52   |   |
| 6002 | Itgb3        | 1.03 | 18   | 1.21   | 23   | 1.25   |   |
| 6003 | Med17        | 1.03 | 69   | 10.01  | 95   | 10.29  |   |
| 6004 | Mettl23      | 1.03 | 26   | 6.42   | 26   | 6.59   |   |
| 6005 | Nnmt         | 1.03 | 18   | 2.7    | 23   | 2.78   |   |
| 6006 | Pigp         | 1.03 | 19   | 3.88   | 21   | 3.99   |   |
| 6007 | Ptgs2        | 1.03 | 8    | 0.66   | 11   | 0.68   |   |
| 6008 | Rpl35a_2     | 1.03 | 0    | 8.7    | 0    | 8.94   |   |
| 6009 | Tmem161b     | 1.03 | 44   | 3.97   | 62   | 4.08   |   |
| 6010 | Zfp956       | 1.03 | 32   | 3.62   | 40   | 3.72   |   |
| 6011 | Zkscan5      | 1.03 | 95   | 7.25   | 133  | 7.45   |   |
| 6012 | Galk2        | 1.03 | 111  | 11.36  | 169  | 11.66  |   |
| 6013 | Zfp217       | 1.03 | 79   | 7.34   | 111  | 7.53   |   |
| 6014 | Polr3e       | 1.03 | 84   | 8.07   | 116  | 8.28   |   |
| 6015 | Uqcc1        | 1.03 | 115  | 10.01  | 157  | 10.27  |   |
| 6016 | Ctdspl2      | 1.03 | 154  | 10.55  | 221  | 10.83  |   |
| 6017 | Atp6v0b      | 1.03 | 136  | 45.39  | 185  | 46.6   |   |
| 6018 | Eif3i        | 1.03 | 167  | 64.34  | 243  | 66.04  |   |
| 6019 | Cir1         | 1.03 | 71   | 11.92  | 115  | 12.24  |   |
| 6020 | Senp1        | 1.03 | 56   | 11.01  | 69   | 11.3   |   |
| 6021 | Eif3g        | 1.03 | 177  | 55.33  | 245  | 56.78  |   |
| 6022 | Fzd3         | 1.03 | 74   | 6.72   | 92   | 6.9    |   |
| 6023 | Atf1         | 1.03 | 160  | 15.44  | 221  | 15.84  |   |
| 6024 | Bmpr1b       | 1.03 | 566  | 96.28  | 819  | 98.78  |   |
| 6025 | Ttyh3        | 1.03 | 483  | 34.69  | 672  | 35.58  |   |
| 6026 | LOC100363782 | 1.03 | 227  | 42.15  | 322  | 43.23  |   |
| 6027 | RGD1562310   | 1.03 | 72   | 6.12   | 96   | 6.27   |   |
| 6028 | Fer          | 1.03 | 98   | 3.47   | 129  | 3.56   |   |
| 6029 | Ctsa         | 1.03 | 785  | 124.63 | 1067 | 127.82 |   |
| 6030 | Capza2       | 1.03 | 213  | 30.03  | 308  | 30.8   |   |
| 6031 | Marcks       | 1.03 | 575  | 49.89  | 787  | 51.16  |   |
| 6032 | Inpp5k       | 1.03 | 84   | 16.16  | 122  | 16.57  |   |
| 6033 | Srsf6        | 1.03 | 459  | 42.46  | 652  | 43.54  |   |
| 6034 | Srrm2        | 1.03 | 3413 | 146.41 | 4671 | 150.1  |   |
| 6035 | Cdc42ep4     | 1.02 | 72   | 7.93   | 93   | 8.13   |   |



Supplemental Table 3  
 FSH + Ad-E versus FSH + Ad-FOXO1(A3), 24 hours

|      | A              | B    | C   | D     | E   | F     | G |
|------|----------------|------|-----|-------|-----|-------|---|
| 6036 | Mink1          | 1.02 | 217 | 13.33 | 311 | 13.66 |   |
| 6037 | Siah1          | 1.02 | 90  | 10.77 | 129 | 11.04 |   |
| 6038 | Tmcc1          | 1.02 | 152 | 11.2  | 226 | 11.48 |   |
| 6039 | Tubgcp3        | 1.02 | 142 | 12.26 | 204 | 12.57 |   |
| 6040 | Rtf1           | 1.02 | 245 | 17.16 | 353 | 17.58 |   |
| 6041 | Ercc6          | 1.02 | 136 | 4.26  | 192 | 4.37  |   |
| 6042 | Nipa2          | 1.02 | 117 | 11.27 | 179 | 11.55 |   |
| 6043 | Jup            | 1.02 | 621 | 49.74 | 867 | 50.97 |   |
| 6044 | Mcph1          | 1.02 | 100 | 5.96  | 141 | 6.11  |   |
| 6045 | Taf4b          | 1.02 | 41  | 2.47  | 50  | 2.53  |   |
| 6046 | Xkr8           | 1.02 | 28  | 3.69  | 39  | 3.78  |   |
| 6047 | Dmwd           | 1.02 | 60  | 8.41  | 80  | 8.62  |   |
| 6048 | Trim33         | 1.02 | 219 | 16.23 | 289 | 16.63 |   |
| 6049 | Usf2           | 1.02 | 174 | 22.09 | 216 | 22.63 |   |
| 6050 | Zfp827         | 1.02 | 167 | 11.32 | 228 | 11.6  |   |
| 6051 | Slmap          | 1.02 | 343 | 16.48 | 452 | 16.88 |   |
| 6052 | Tdg            | 1.02 | 259 | 22.53 | 348 | 23.07 |   |
| 6053 | Slu7           | 1.02 | 172 | 26.01 | 245 | 26.63 |   |
| 6054 | Gfpt1          | 1.02 | 359 | 19.26 | 503 | 19.72 |   |
| 6055 | Nsun4_1        | 1.02 | 13  | 6.5   | 17  | 6.65  |   |
| 6056 | Ap4b1          | 1.02 | 53  | 5.7   | 71  | 5.84  |   |
| 6057 | Pstk           | 1.02 | 80  | 5.49  | 117 | 5.62  |   |
| 6058 | Chd8           | 1.02 | 587 | 23.25 | 816 | 23.8  |   |
| 6059 | Lrig2          | 1.02 | 83  | 5.11  | 124 | 5.23  |   |
| 6060 | LOC100364912   | 1.02 | 66  | 11.01 | 93  | 11.27 |   |
| 6061 | Trip11         | 1.02 | 198 | 7.29  | 269 | 7.46  |   |
| 6062 | Abcg3l1        | 1.02 | 74  | 4.77  | 99  | 4.88  |   |
| 6063 | Cep57l1        | 1.02 | 40  | 2.95  | 66  | 3.02  |   |
| 6064 | RGD1311703     | 1.02 | 197 | 42.06 | 288 | 43.03 |   |
| 6065 | Zw10           | 1.02 | 66  | 7.82  | 90  | 8     |   |
| 6066 | AABR07009106.2 | 1.02 | 17  | 3.37  | 25  | 3.45  |   |
| 6067 | Amacr          | 1.02 | 30  | 3.97  | 37  | 4.07  |   |
| 6068 | Cdyl           | 1.02 | 86  | 6.3   | 142 | 6.45  |   |
| 6069 | Msh6           | 1.02 | 181 | 14.1  | 258 | 14.43 |   |
| 6070 | Rbm5           | 1.02 | 487 | 32.99 | 694 | 33.76 |   |
| 6071 | Trmt10b        | 1.02 | 45  | 5.29  | 44  | 5.41  |   |
| 6072 | Gorasp2_1      | 1.02 | 11  | 27.48 | 21  | 28.1  |   |
| 6073 | Rpl11          | 1.02 | 415 | 42.47 | 571 | 43.44 |   |
| 6074 | Flot2          | 1.02 | 266 | 28.16 | 390 | 28.8  |   |
| 6075 | LOC100910568   | 1.02 | 152 | 2.86  | 230 | 2.93  |   |
| 6076 | Tsc22d3_1      | 1.02 | 106 | 19.81 | 145 | 20.26 |   |
| 6077 | Dgkz           | 1.02 | 96  | 8.52  | 133 | 8.71  |   |
| 6078 | Wdr36          | 1.02 | 100 | 11.55 | 150 | 11.81 |   |
| 6079 | Zfp746         | 1.02 | 114 | 8.53  | 179 | 8.73  |   |
| 6080 | Suz12          | 1.02 | 92  | 11.08 | 141 | 11.32 |   |
| 6081 | St5            | 1.02 | 352 | 21.34 | 539 | 21.82 |   |
| 6082 | Usf1           | 1.02 | 126 | 25.19 | 175 | 25.75 |   |
| 6083 | Ap5m1          | 1.02 | 77  | 5.92  | 97  | 6.05  |   |
| 6084 | Cyth1          | 1.02 | 102 | 5.72  | 147 | 5.85  |   |
| 6085 | Prickle2       | 1.02 | 134 | 4.62  | 172 | 4.72  |   |
| 6086 | Sh2b3          | 1.02 | 90  | 4.11  | 153 | 4.2   |   |
| 6087 | Pnpt1          | 1.02 | 160 | 13.47 | 214 | 13.77 |   |
| 6088 | Pnrc1          | 1.02 | 198 | 44.75 | 274 | 45.73 |   |
| 6089 | Atp10d         | 1.02 | 301 | 21.28 | 437 | 21.74 |   |

Supplemental Table 3  
 FSH + Ad-E versus FSH + Ad-FOXO1(A3), 24 hours

|      | A              | B    | C    | D      | E    | F      | G |
|------|----------------|------|------|--------|------|--------|---|
| 6090 | Hira           | 1.02 | 21   | 14.46  | 26   | 14.77  |   |
| 6091 | Armcx6         | 1.02 | 30   | 5.63   | 42   | 5.75   |   |
| 6092 | Ehbp111        | 1.02 | 44   | 2.11   | 47   | 2.16   |   |
| 6093 | Rpo1-3         | 1.02 | 126  | 11.43  | 206  | 11.68  |   |
| 6094 | Mmp11          | 1.02 | 1028 | 233.77 | 1425 | 238.78 |   |
| 6095 | Dnaaf5         | 1.02 | 87   | 7.46   | 113  | 7.62   |   |
| 6096 | Tomm22         | 1.02 | 142  | 49.92  | 196  | 50.98  |   |
| 6097 | Mapk9          | 1.02 | 261  | 17.56  | 338  | 17.93  |   |
| 6098 | Arcn1          | 1.02 | 577  | 58.19  | 799  | 59.42  |   |
| 6099 | Fam195b        | 1.02 | 86   | 25.88  | 112  | 26.43  |   |
| 6100 | Rpl36al_2      | 1.02 | 14   | 28.14  | 9    | 28.73  |   |
| 6101 | Tm9sf3         | 1.02 | 395  | 63.76  | 537  | 65.09  |   |
| 6102 | Eif1           | 1.02 | 434  | 150.78 | 577  | 153.87 |   |
| 6103 | AABR07054405.1 | 1.02 | 271  | 26.26  | 434  | 26.79  |   |
| 6104 | Plagl2         | 1.02 | 75   | 4.91   | 105  | 5.01   |   |
| 6105 | Tead2          | 1.02 | 253  | 38.45  | 372  | 39.23  |   |
| 6106 | Mark3          | 1.02 | 356  | 22.58  | 542  | 23.04  |   |
| 6107 | Pi4kb          | 1.02 | 372  | 26.31  | 510  | 26.84  |   |
| 6108 | Sucla2         | 1.02 | 326  | 50.36  | 490  | 51.37  |   |
| 6109 | Lig3           | 1.02 | 187  | 11.64  | 282  | 11.87  |   |
| 6110 | Kdm3a          | 1.02 | 226  | 15.99  | 311  | 16.31  |   |
| 6111 | Fam110a        | 1.02 | 30   | 3.46   | 40   | 3.52   |   |
| 6112 | Gpr161         | 1.02 | 21   | 1.87   | 34   | 1.91   |   |
| 6113 | Mboat1         | 1.02 | 62   | 4.19   | 84   | 4.27   |   |
| 6114 | Mob1b          | 1.02 | 110  | 11.78  | 161  | 12.01  |   |
| 6115 | Pwwp2b         | 1.02 | 20   | 1.78   | 27   | 1.82   |   |
| 6116 | Sec22b         | 1.02 | 143  | 31.07  | 197  | 31.68  |   |
| 6117 | SNORD27        | 1.02 | 11   | 53.82  | 15   | 54.87  |   |
| 6118 | Tmem209        | 1.02 | 106  | 10.88  | 115  | 11.09  |   |
| 6119 | Usp45          | 1.02 | 128  | 5.2    | 161  | 5.3    |   |
| 6120 | Vamp5          | 1.02 | 26   | 26.03  | 32   | 26.54  |   |
| 6121 | Wrn            | 1.02 | 127  | 6.04   | 177  | 6.15   |   |
| 6122 | Zfp12          | 1.02 | 33   | 5.43   | 45   | 5.54   |   |
| 6123 | Arpp19         | 1.02 | 38   | 23.5   | 56   | 23.96  |   |
| 6124 | Lcorl          | 1.02 | 134  | 4.01   | 218  | 4.09   |   |
| 6125 | Nubpl          | 1.02 | 37   | 2.11   | 58   | 2.15   |   |
| 6126 | Rab27a         | 1.02 | 16   | 1.49   | 21   | 1.52   |   |
| 6127 | Shisa2         | 1.02 | 11   | 4.15   | 15   | 4.23   |   |
| 6128 | Zfp512         | 1.02 | 133  | 10.68  | 203  | 10.89  |   |
| 6129 | Nfatc3         | 1.02 | 360  | 18.4   | 470  | 18.75  |   |
| 6130 | Gga1           | 1.02 | 138  | 16.39  | 188  | 16.7   |   |
| 6131 | Birc6          | 1.02 | 584  | 15.87  | 827  | 16.17  |   |
| 6132 | Amd1           | 1.02 | 193  | 19.87  | 264  | 20.24  |   |
| 6133 | Slc25a17       | 1.02 | 144  | 12     | 191  | 12.22  |   |
| 6134 | Pygb           | 1.02 | 431  | 23.4   | 630  | 23.83  |   |
| 6135 | Oxct1          | 1.02 | 238  | 22.83  | 309  | 23.24  |   |
| 6136 | Mef2a          | 1.02 | 129  | 10.02  | 219  | 10.2   |   |
| 6137 | Tgfb1_1        | 1.02 | 274  | 21.85  | 361  | 22.24  |   |
| 6138 | Cpsf7          | 1.02 | 312  | 30.11  | 414  | 30.65  |   |
| 6139 | Gpr107         | 1.02 | 204  | 15.22  | 284  | 15.49  |   |
| 6140 | Prrc1          | 1.02 | 99   | 18.32  | 127  | 18.65  |   |
| 6141 | Slc35a3        | 1.02 | 93   | 15.61  | 123  | 15.89  |   |
| 6142 | Stx18          | 1.02 | 97   | 8.74   | 104  | 8.89   |   |
| 6143 | Hectd3         | 1.02 | 40   | 5.04   | 56   | 5.13   |   |

Supplemental Table 3  
 FSH + Ad-E versus FSH + Ad-FOXO1(A3), 24 hours

|      | A          | B    | C    | D      | E    | F      | G |
|------|------------|------|------|--------|------|--------|---|
| 6144 | Arfgap1    | 1.02 | 156  | 23.41  | 218  | 23.81  |   |
| 6145 | Zcchc2     | 1.02 | 103  | 4.09   | 141  | 4.16   |   |
| 6146 | Tmsb10_1   | 1.02 | 473  | 363.85 | 640  | 370.09 |   |
| 6147 | Ccny       | 1.02 | 186  | 33.82  | 253  | 34.39  |   |
| 6148 | Fam120b    | 1.02 | 184  | 9.96   | 264  | 10.12  |   |
| 6149 | Cdkal1     | 1.02 | 146  | 5.35   | 181  | 5.44   |   |
| 6150 | Clk4       | 1.02 | 104  | 13.03  | 184  | 13.25  |   |
| 6151 | Clspn      | 1.02 | 15   | 1.79   | 25   | 1.82   |   |
| 6152 | Mccc1      | 1.02 | 28   | 3.67   | 36   | 3.73   |   |
| 6153 | Plekhf2    | 1.02 | 54   | 6.35   | 79   | 6.46   |   |
| 6154 | Rab5a      | 1.02 | 40   | 17.3   | 84   | 17.59  |   |
| 6155 | Stk3       | 1.02 | 141  | 9.88   | 261  | 10.04  |   |
| 6156 | Phax       | 1.02 | 63   | 11.66  | 81   | 11.86  |   |
| 6157 | Tnpo3      | 1.02 | 323  | 25.25  | 441  | 25.67  |   |
| 6158 | C2cd3      | 1.02 | 154  | 6.48   | 223  | 6.59   |   |
| 6159 | Trmt1l     | 1.02 | 111  | 8.4    | 181  | 8.54   |   |
| 6160 | Nradd      | 1.02 | 85   | 23.51  | 120  | 23.89  |   |
| 6161 | Tmem18     | 1.02 | 106  | 10.61  | 139  | 10.78  |   |
| 6162 | Naa50      | 1.02 | 20   | 4.02   | 32   | 4.08   |   |
| 6163 | Atp6ap2    | 1.02 | 129  | 19.92  | 171  | 20.23  |   |
| 6164 | Slc25a36l1 | 1.02 | 273  | 31.33  | 371  | 31.81  |   |
| 6165 | Tmx4       | 1.02 | 410  | 29.64  | 571  | 30.09  |   |
| 6166 | Mxi1       | 1.02 | 117  | 11.68  | 183  | 11.85  |   |
| 6167 | Tnks       | 1.02 | 338  | 17.25  | 505  | 17.51  |   |
| 6168 | Fam171b    | 1.01 | 237  | 30.72  | 326  | 31.17  |   |
| 6169 | Htt        | 1.01 | 300  | 6.84   | 427  | 6.94   |   |
| 6170 | Bag2       | 1.01 | 35   | 6.52   | 55   | 6.62   |   |
| 6171 | Glyctk     | 1.01 | 16   | 2.57   | 20   | 2.6    |   |
| 6172 | Ly9        | 1.01 | 18   | 2.58   | 26   | 2.61   |   |
| 6173 | Mog        | 1.01 | 26   | 3.21   | 80   | 3.26   |   |
| 6174 | Mpped2     | 1.01 | 100  | 6.48   | 210  | 6.58   |   |
| 6175 | Nnat       | 1.01 | 59   | 12.07  | 76   | 12.25  |   |
| 6176 | Polk       | 1.01 | 25   | 1.33   | 29   | 1.35   |   |
| 6177 | Rpf1       | 1.01 | 66   | 10.9   | 88   | 11.06  |   |
| 6178 | Rslcan18   | 1.01 | 28   | 4.25   | 38   | 4.31   |   |
| 6179 | Smg5       | 1.01 | 286  | 20.73  | 381  | 21.04  |   |
| 6180 | Vmp1       | 1.01 | 150  | 18     | 222  | 18.27  |   |
| 6181 | Wdr54      | 1.01 | 5    | 1.16   | 7    | 1.18   |   |
| 6182 | Insr       | 1.01 | 412  | 17.61  | 565  | 17.87  |   |
| 6183 | Rab7a      | 1.01 | 389  | 68.01  | 529  | 68.97  |   |
| 6184 | Trip12     | 1.01 | 1121 | 48.71  | 1511 | 49.39  |   |
| 6185 | Bri3       | 1.01 | 88   | 35.53  | 139  | 36.02  |   |
| 6186 | Ensa       | 1.01 | 162  | 17.67  | 212  | 17.91  |   |
| 6187 | Kdm4c      | 1.01 | 116  | 6.4    | 179  | 6.49   |   |
| 6188 | Klh7       | 1.01 | 205  | 15.81  | 258  | 16.03  |   |
| 6189 | Gramd3     | 1.01 | 88   | 7.78   | 128  | 7.89   |   |
| 6190 | Sertad1    | 1.01 | 60   | 18.31  | 86   | 18.56  |   |
| 6191 | Tsg101     | 1.01 | 265  | 51.48  | 362  | 52.18  |   |
| 6192 | Txndc17    | 1.01 | 49   | 11.43  | 63   | 11.59  |   |
| 6193 | Rptor      | 1.01 | 246  | 8.97   | 330  | 9.09   |   |
| 6194 | Gcc1       | 1.01 | 76   | 7.79   | 103  | 7.89   |   |
| 6195 | Efemp1     | 1.01 | 81   | 13.34  | 119  | 13.52  |   |
| 6196 | Pde8a      | 1.01 | 558  | 53.74  | 901  | 54.46  |   |
| 6197 | Wdr7       | 1.01 | 273  | 10.98  | 377  | 11.12  |   |

Supplemental Table 3  
 FSH + Ad-E versus FSH + Ad-FOXO1(A3), 24 hours

|      | A            | B    | C   | D      | E   | F      | G |
|------|--------------|------|-----|--------|-----|--------|---|
| 6198 | lars2        | 1.01 | 197 | 19.5   | 288 | 19.75  |   |
| 6199 | Cyfip1       | 1.01 | 537 | 38.73  | 780 | 39.23  |   |
| 6200 | Ddrgk1       | 1.01 | 33  | 7.14   | 48  | 7.23   |   |
| 6201 | Lcat         | 1.01 | 41  | 8.24   | 52  | 8.35   |   |
| 6202 | Rhobtb2      | 1.01 | 31  | 2.14   | 50  | 2.17   |   |
| 6203 | Ccdc47       | 1.01 | 323 | 27.56  | 461 | 27.92  |   |
| 6204 | Osbpl6       | 1.01 | 118 | 4.34   | 159 | 4.4    |   |
| 6205 | Pdcd4        | 1.01 | 275 | 37.43  | 374 | 37.91  |   |
| 6206 | Reps1        | 1.01 | 128 | 15.79  | 174 | 16     |   |
| 6207 | Psmc6        | 1.01 | 166 | 38.31  | 224 | 38.78  |   |
| 6208 | Ergic1       | 1.01 | 428 | 50.58  | 604 | 51.2   |   |
| 6209 | Matr3        | 1.01 | 196 | 26.65  | 301 | 26.98  |   |
| 6210 | Atpaf1       | 1.01 | 77  | 5.5    | 107 | 5.57   |   |
| 6211 | Hipk1        | 1.01 | 702 | 30.2   | 962 | 30.57  |   |
| 6212 | LOC103689992 | 1.01 | 197 | 67.95  | 188 | 68.77  |   |
| 6213 | Crip2        | 1.01 | 80  | 25.73  | 112 | 26.04  |   |
| 6214 | Ehd2         | 1.01 | 245 | 41.44  | 342 | 41.93  |   |
| 6215 | Atad1        | 1.01 | 197 | 15.09  | 290 | 15.27  |   |
| 6216 | Ptp4a2       | 1.01 | 209 | 59.86  | 293 | 60.56  |   |
| 6217 | Bsdc1        | 1.01 | 260 | 29.86  | 360 | 30.2   |   |
| 6218 | Josd2        | 1.01 | 23  | 7.24   | 34  | 7.32   |   |
| 6219 | Mgst1        | 1.01 | 333 | 116.62 | 459 | 117.96 |   |
| 6220 | Shisa4       | 1.01 | 22  | 10.36  | 40  | 10.48  |   |
| 6221 | Strbp        | 1.01 | 114 | 9.41   | 173 | 9.52   |   |
| 6222 | Tex30        | 1.01 | 30  | 3.16   | 48  | 3.19   |   |
| 6223 | Vps36        | 1.01 | 47  | 8.84   | 66  | 8.94   |   |
| 6224 | Stxbp5       | 1.01 | 184 | 4.56   | 242 | 4.61   |   |
| 6225 | Bcat1        | 1.01 | 573 | 63.62  | 794 | 64.31  |   |
| 6226 | Aldh18a1     | 1.01 | 0   | 5.63   | 0   | 5.69   |   |
| 6227 | Bace2        | 1.01 | 310 | 40.73  | 390 | 41.16  |   |
| 6228 | Anp32b       | 1.01 | 352 | 87.7   | 486 | 88.63  |   |
| 6229 | Wdtdc1       | 1.01 | 232 | 18.55  | 327 | 18.75  |   |
| 6230 | LOC100910957 | 1.01 | 38  | 6.75   | 61  | 6.81   |   |
| 6231 | Shprh        | 1.01 | 198 | 7.66   | 284 | 7.74   |   |
| 6232 | Coro1b       | 1.01 | 382 | 74.36  | 532 | 75.12  |   |
| 6233 | Tmem63b      | 1.01 | 195 | 20.42  | 277 | 20.62  |   |
| 6234 | Acap2        | 1.01 | 211 | 13.72  | 289 | 13.85  |   |
| 6235 | Hccs         | 1.01 | 40  | 6.04   | 55  | 6.1    |   |
| 6236 | Mrpl13       | 1.01 | 82  | 25.89  | 112 | 26.13  |   |
| 6237 | Nkiras1      | 1.01 | 21  | 3.21   | 30  | 3.24   |   |
| 6238 | Ppm1h        | 1.01 | 60  | 1.5    | 71  | 1.51   |   |
| 6239 | Rmdn3        | 1.01 | 10  | 3.29   | 12  | 3.33   |   |
| 6240 | Ago3         | 1.01 | 49  | 2.31   | 65  | 2.33   |   |
| 6241 | Dnaja3       | 1.01 | 125 | 17.51  | 164 | 17.67  |   |
| 6242 | Inip         | 1.01 | 47  | 10.16  | 57  | 10.25  |   |
| 6243 | Mphosph9     | 1.01 | 53  | 2.11   | 79  | 2.13   |   |
| 6244 | Obfc1        | 1.01 | 76  | 9.01   | 109 | 9.09   |   |
| 6245 | Phc2         | 1.01 | 316 | 23.32  | 458 | 23.53  |   |
| 6246 | LOC100911372 | 1.01 | 31  | 301.26 | 19  | 304.01 |   |
| 6247 | Tpra1        | 1.01 | 169 | 26.7   | 235 | 26.94  |   |
| 6248 | Ppp1r9a      | 1.01 | 219 | 5.95   | 261 | 6      |   |
| 6249 | Zfp518b      | 1.01 | 63  | 6.28   | 85  | 6.34   |   |
| 6250 | Nub1         | 1.01 | 152 | 25.4   | 211 | 25.61  |   |
| 6251 | Sdha         | 1.01 | 338 | 47.86  | 469 | 48.27  |   |

Supplemental Table 3  
FSH + Ad-E versus FSH + Ad-FOXO1(A3), 24 hours

|      | A              | B    | C    | D      | E    | F      | G |
|------|----------------|------|------|--------|------|--------|---|
| 6252 | Serinc1        | 1.01 | 489  | 106.46 | 682  | 107.33 |   |
| 6253 | Grpel2         | 1.01 | 98   | 7.2    | 146  | 7.26   |   |
| 6254 | Crnk1l1_1      | 1.01 | 20   | 13.85  | 34   | 13.97  |   |
| 6255 | Slc38a10       | 1.01 | 312  | 25.72  | 414  | 25.92  |   |
| 6256 | Hba2           | 1.01 | 1074 | 1043.3 | 1226 | 1051.7 |   |
| 6257 | Gpd1l          | 1.01 | 94   | 8.68   | 128  | 8.75   |   |
| 6258 | Camlg          | 1.01 | 81   | 11.94  | 118  | 12.03  |   |
| 6259 | Cdk5rap3       | 1.01 | 73   | 12.92  | 106  | 13.02  |   |
| 6260 | Eno2           | 1.01 | 0    | 3.72   | 0    | 3.74   |   |
| 6261 | Limk1          | 1.01 | 56   | 5.02   | 77   | 5.06   |   |
| 6262 | Emg1           | 1.01 | 111  | 9.71   | 169  | 9.77   |   |
| 6263 | Atf2           | 1.01 | 144  | 19.15  | 196  | 19.28  |   |
| 6264 | Plxnb2         | 1.01 | 1636 | 90.23  | 2215 | 90.84  |   |
| 6265 | Zscan26        | 1.01 | 224  | 15.41  | 306  | 15.52  |   |
| 6266 | Hid1           | 1.01 | 107  | 10.54  | 140  | 10.61  |   |
| 6267 | Eif3b          | 1.01 | 406  | 48.38  | 551  | 48.69  |   |
| 6268 | Fxyd6          | 1.01 | 55   | 10.66  | 73   | 10.73  |   |
| 6269 | Mppe1          | 1.01 | 75   | 8.18   | 109  | 8.23   |   |
| 6270 | Mrps11         | 1.01 | 65   | 10.55  | 76   | 10.62  |   |
| 6271 | Nifk           | 1.01 | 53   | 12.85  | 76   | 12.93  |   |
| 6272 | Sh3d19         | 1.01 | 57   | 7.94   | 87   | 8      |   |
| 6273 | Zc3hc1         | 1.01 | 70   | 10.32  | 95   | 10.39  |   |
| 6274 | Csnk2a2        | 1.01 | 222  | 26.24  | 328  | 26.39  |   |
| 6275 | Gpatch4        | 1.01 | 108  | 10.63  | 117  | 10.69  |   |
| 6276 | Pkn2           | 1.01 | 404  | 19.77  | 568  | 19.88  |   |
| 6277 | Sqstm1         | 1.01 | 707  | 106.1  | 1020 | 106.7  |   |
| 6278 | Slc39a1        | 1.01 | 484  | 72.68  | 661  | 73.09  |   |
| 6279 | Papola         | 1.01 | 501  | 31.75  | 708  | 31.92  |   |
| 6280 | Irak4          | 1.01 | 42   | 2.63   | 49   | 2.64   |   |
| 6281 | Nipa1          | 1.01 | 50   | 5.71   | 72   | 5.74   |   |
| 6282 | Psmc3          | 1.01 | 211  | 45.2   | 284  | 45.45  |   |
| 6283 | Foxn3          | 1.01 | 247  | 11.37  | 392  | 11.42  |   |
| 6284 | Cmtm6          | 1.01 | 219  | 23.59  | 296  | 23.71  |   |
| 6285 | Pold1          | 1.01 | 67   | 5.33   | 88   | 5.36   |   |
| 6286 | Ankrd40        | 1    | 204  | 20.56  | 289  | 20.65  |   |
| 6287 | ldh3B          | 1    | 136  | 30.77  | 186  | 30.92  |   |
| 6288 | Taf11          | 1    | 46   | 9.75   | 62   | 9.8    |   |
| 6289 | LOC100910429   | 1    | 153  | 8.98   | 195  | 9.02   |   |
| 6290 | Celf1          | 1    | 353  | 48.02  | 540  | 48.23  |   |
| 6291 | Tstd2          | 1    | 77   | 7.2    | 120  | 7.23   |   |
| 6292 | Oat            | 1    | 107  | 17.19  | 146  | 17.26  |   |
| 6293 | Rassf8         | 1    | 117  | 7.05   | 171  | 7.08   |   |
| 6294 | Zfp358         | 1    | 137  | 24.42  | 186  | 24.52  |   |
| 6295 | Dis3l          | 1    | 85   | 7.75   | 114  | 7.78   |   |
| 6296 | Gstcd          | 1    | 46   | 2.68   | 67   | 2.69   |   |
| 6297 | Fam134c        | 1    | 208  | 21.28  | 292  | 21.36  |   |
| 6298 | Xpo7           | 1    | 465  | 30.94  | 679  | 31.04  |   |
| 6299 | Akr1cl         | 1    | 47   | 10.37  | 75   | 10.4   |   |
| 6300 | Dapk1          | 1    | 287  | 14.6   | 394  | 14.64  |   |
| 6301 | Gtf3c4         | 1    | 206  | 10.78  | 287  | 10.81  |   |
| 6302 | AABR07058985.2 | 1    | 35   | 4.85   | 47   | 4.87   |   |
| 6303 | Etfdh          | 1    | 110  | 13.82  | 163  | 13.86  |   |
| 6304 | Smc6           | 1    | 165  | 10.06  | 237  | 10.08  |   |
| 6305 | Senp6          | 1    | 473  | 27.75  | 670  | 27.82  |   |

Supplemental Table 3  
 FSH + Ad-E versus FSH + Ad-FOXO1(A3), 24 hours

|      | A              | B  | C    | D      | E    | F      | G |
|------|----------------|----|------|--------|------|--------|---|
| 6306 | Eri3           | 1  | 377  | 47.13  | 455  | 47.25  |   |
| 6307 | Rnf40          | 1  | 36   | 4.66   | 42   | 4.67   |   |
| 6308 | Echdc1         | 1  | 55   | 8.55   | 82   | 8.57   |   |
| 6309 | Enoph1         | 1  | 61   | 9.44   | 86   | 9.47   |   |
| 6310 | Hdgfrp2        | 1  | 163  | 20.62  | 228  | 20.67  |   |
| 6311 | Dnaja1         | 1  | 345  | 79.84  | 519  | 80.03  |   |
| 6312 | Prrc2b         | 1  | 766  | 37.38  | 1028 | 37.46  |   |
| 6313 | Cr1l           | 1  | 261  | 36.84  | 380  | 36.92  |   |
| 6314 | Abt1           | 1  | 42   | 13.18  | 58   | 13.21  |   |
| 6315 | Fam219b        | 1  | 112  | 11.67  | 140  | 11.7   |   |
| 6316 | Pnp            | 1  | 637  | 196.48 | 867  | 196.89 |   |
| 6317 | Pom121         | 1  | 254  | 16.05  | 346  | 16.08  |   |
| 6318 | Pcif1          | 1  | 168  | 13.66  | 228  | 13.68  |   |
| 6319 | Rest           | 1  | 255  | 21.35  | 358  | 21.39  |   |
| 6320 | Topbp1         | 1  | 126  | 8.35   | 165  | 8.37   |   |
| 6321 | Zfp668         | 1  | 70   | 5.37   | 84   | 5.38   |   |
| 6322 | Casp3          | 1  | 65   | 7.8    | 80   | 7.81   |   |
| 6323 | Tmed7          | 1  | 326  | 34.15  | 440  | 34.2   |   |
| 6324 | Vps9d1         | 1  | 109  | 7.51   | 124  | 7.52   |   |
| 6325 | Smg6           | 1  | 217  | 6.16   | 334  | 6.16   |   |
| 6326 | Lman1          | 1  | 290  | 45.55  | 390  | 45.6   |   |
| 6327 | Ccdc132        | 1  | 100  | 12.09  | 149  | 12.1   |   |
| 6328 | Tnrc6c         | 1  | 153  | 7.37   | 202  | 7.38   |   |
| 6329 | Rfx5           | 1  | 128  | 10.49  | 174  | 10.5   |   |
| 6330 | Gnai1          | 1  | 96   | 16.17  | 131  | 16.19  |   |
| 6331 | Abhd17b        | 1  | 89   | 9.52   | 140  | 9.52   |   |
| 6332 | Rasl11a        | 1  | 69   | 18.46  | 98   | 18.47  |   |
| 6333 | Eps15l1        | 1  | 320  | 15.04  | 428  | 15.05  |   |
| 6334 | Sf3a1          | 1  | 282  | 19.19  | 390  | 19.2   |   |
| 6335 | LOC100912182   | 1  | 61   | 49.94  | 87   | 49.97  |   |
| 6336 | Ubqln1         | 1  | 451  | 40.46  | 615  | 40.48  |   |
| 6337 | Zcchc11        | 1  | 825  | 51.65  | 1207 | 51.68  |   |
| 6338 | Alkbh5         | 1  | 250  | 16.38  | 332  | 16.39  |   |
| 6339 | Noc2l          | 1  | 164  | 21.98  | 227  | 21.98  |   |
| 6340 | Parn           | -1 | 118  | 8.36   | 173  | 8.36   |   |
| 6341 | Mapkbp1        | -1 | 277  | 12.76  | 347  | 12.75  |   |
| 6342 | Rdh11          | -1 | 97   | 16.07  | 135  | 16.06  |   |
| 6343 | Asb8           | -1 | 127  | 15.31  | 166  | 15.3   |   |
| 6344 | Gab1           | -1 | 152  | 14.88  | 252  | 14.88  |   |
| 6345 | Hnrnpul1       | -1 | 772  | 69.4   | 1046 | 69.37  |   |
| 6346 | Herpud2        | -1 | 123  | 16.71  | 192  | 16.7   |   |
| 6347 | Ubxn1          | -1 | 198  | 64.59  | 264  | 64.56  |   |
| 6348 | Zfp62          | -1 | 96   | 11.27  | 131  | 11.26  |   |
| 6349 | Ankzf1         | -1 | 142  | 15.35  | 208  | 15.33  |   |
| 6350 | Ak2            | -1 | 190  | 25.57  | 267  | 25.54  |   |
| 6351 | Fyn            | -1 | 235  | 13.74  | 327  | 13.72  |   |
| 6352 | Prkag1         | -1 | 1346 | 23.15  | 1831 | 23.11  |   |
| 6353 | Dot1l          | -1 | 238  | 10.23  | 318  | 10.22  |   |
| 6354 | Snrpb          | -1 | 349  | 74.13  | 465  | 74     |   |
| 6355 | LOC684988      | -1 | 292  | 299.76 | 377  | 299.16 |   |
| 6356 | Eprs           | -1 | 564  | 36.99  | 743  | 36.91  |   |
| 6357 | Sec24d         | -1 | 302  | 27.33  | 398  | 27.27  |   |
| 6358 | AABR07054554.1 | -1 | 3    | 0.97   | 4    | 0.97   |   |
| 6359 | Cdkl2          | -1 | 19   | 1.2    | 29   | 1.19   |   |

Supplemental Table 3  
 FSH + Ad-E versus FSH + Ad-FOXO1(A3), 24 hours

|      | A              | B  | C   | D     | E   | F     | G |
|------|----------------|----|-----|-------|-----|-------|---|
| 6360 | Dhdh           | -1 | 54  | 6.5   | 64  | 6.48  |   |
| 6361 | Dtd1           | -1 | 66  | 11.78 | 101 | 11.74 |   |
| 6362 | Gba2           | -1 | 104 | 9.35  | 144 | 9.32  |   |
| 6363 | Gps2           | -1 | 65  | 16.03 | 91  | 15.98 |   |
| 6364 | Kat8           | -1 | 85  | 12.97 | 159 | 12.93 |   |
| 6365 | Kcnc2          | -1 | 27  | 0.59  | 35  | 0.59  |   |
| 6366 | Kcnh1          | -1 | 14  | 0.22  | 15  | 0.22  |   |
| 6367 | LOC100174910   | -1 | 35  | 3.02  | 53  | 3.01  |   |
| 6368 | Nsun4_2        | -1 | 0   | 0.71  | 0   | 0.7   |   |
| 6369 | Pik3cg         | -1 | 4   | 0.17  | 8   | 0.17  |   |
| 6370 | Pogz           | -1 | 455 | 21.18 | 623 | 21.12 |   |
| 6371 | Rad54b         | -1 | 57  | 1.32  | 80  | 1.32  |   |
| 6372 | Rit1           | -1 | 117 | 25.35 | 228 | 25.27 |   |
| 6373 | Rpe            | -1 | 48  | 4.56  | 64  | 4.55  |   |
| 6374 | AABR07008066.3 | -1 | 4   | 1.01  | 4   | 1     |   |
| 6375 | AABR07026893.1 | -1 | 7   | 16.71 | 8   | 16.66 |   |
| 6376 | AABR07028795.2 | -1 | 13  | 1.84  | 20  | 1.83  |   |
| 6377 | AABR07044935.1 | -1 | 0   | 0.6   | 0   | 0.6   |   |
| 6378 | AABR07072539.3 | -1 | 0   | 1.27  | 0   | 1.27  |   |
| 6379 | Abca4          | -1 | 15  | 0.3   | 19  | 0.3   |   |
| 6380 | AC126148.2     | -1 | 5   | 4.26  | 12  | 4.25  |   |
| 6381 | Acss3          | -1 | 193 | 9.68  | 267 | 9.65  |   |
| 6382 | Acyp2          | -1 | 16  | 0.95  | 20  | 0.95  |   |
| 6383 | Adamtsl4       | -1 | 7   | 0.52  | 14  | 0.52  |   |
| 6384 | Adar           | -1 | 137 | 9.03  | 187 | 9     |   |
| 6385 | Akap8          | -1 | 189 | 14.89 | 251 | 14.84 |   |
| 6386 | Alk            | -1 | 163 | 4.09  | 296 | 4.08  |   |
| 6387 | Ap4s1          | -1 | 33  | 1.91  | 37  | 1.9   |   |
| 6388 | Apcdd1         | -1 | 311 | 35.31 | 421 | 35.2  |   |
| 6389 | Arhgef7        | -1 | 211 | 11.84 | 266 | 11.81 |   |
| 6390 | Casz1          | -1 | 43  | 1.8   | 56  | 1.8   |   |
| 6391 | Ccdc176        | -1 | 21  | 0.49  | 47  | 0.49  |   |
| 6392 | Cd46           | -1 | 11  | 0.91  | 25  | 0.91  |   |
| 6393 | Cenpl          | -1 | 21  | 3.45  | 35  | 3.44  |   |
| 6394 | Cep104         | -1 | 156 | 10.43 | 205 | 10.4  |   |
| 6395 | Cep83          | -1 | 34  | 2.83  | 39  | 2.82  |   |
| 6396 | Csgalnact1     | -1 | 12  | 0.67  | 14  | 0.66  |   |
| 6397 | Dbf4_1         | -1 | 3   | 1.73  | 4   | 1.72  |   |
| 6398 | Dcp2_2         | -1 | 0   | 0.76  | 0   | 0.76  |   |
| 6399 | Dnajb9         | -1 | 66  | 12.41 | 89  | 12.37 |   |
| 6400 | Doc2b          | -1 | 9   | 0.88  | 5   | 0.88  |   |
| 6401 | Doc2g          | -1 | 4   | 0.74  | 4   | 0.74  |   |
| 6402 | Erp29          | -1 | 135 | 24.73 | 180 | 24.65 |   |
| 6403 | Fam186a        | -1 | 13  | 0.2   | 12  | 0.2   |   |
| 6404 | Fam76b         | -1 | 117 | 6.7   | 169 | 6.68  |   |
| 6405 | Fam98c         | -1 | 23  | 4.28  | 37  | 4.27  |   |
| 6406 | Faxc           | -1 | 6   | 0.65  | 14  | 0.64  |   |
| 6407 | Fbxo24         | -1 | 13  | 0.52  | 13  | 0.52  |   |
| 6408 | Fig4           | -1 | 113 | 7.48  | 145 | 7.45  |   |
| 6409 | Flad1          | -1 | 66  | 6.84  | 88  | 6.82  |   |
| 6410 | Gpr155         | -1 | 7   | 0.44  | 16  | 0.44  |   |
| 6411 | Gpr157         | -1 | 3   | 0.46  | 5   | 0.46  |   |
| 6412 | Gramd2         | -1 | 7   | 0.77  | 5   | 0.77  |   |
| 6413 | Gtf2b          | -1 | 82  | 20.03 | 104 | 19.97 |   |

Supplemental Table 3  
 FSH + Ad-E versus FSH + Ad-FOXO1(A3), 24 hours

|      | A            | B  | C   | D     | E    | F     | G |
|------|--------------|----|-----|-------|------|-------|---|
| 6414 | Hapln2       | -1 | 4   | 0.78  | 12   | 0.78  |   |
| 6415 | Hcfc1        | -1 | 852 | 32.63 | 1124 | 32.53 |   |
| 6416 | Hmgn5b       | -1 | 1   | 0.53  | 0    | 0.53  |   |
| 6417 | Khk          | -1 | 11  | 0.76  | 15   | 0.76  |   |
| 6418 | Klhl32       | -1 | 37  | 1.36  | 47   | 1.36  |   |
| 6419 | LOC100912928 | -1 | 0   | 2.19  | 0    | 2.19  |   |
| 6420 | LOC102553866 | -1 | 18  | 1.82  | 23   | 1.81  |   |
| 6421 | Mamdc4       | -1 | 10  | 0.28  | 11   | 0.28  |   |
| 6422 | Map3k13      | -1 | 51  | 0.39  | 118  | 0.39  |   |
| 6423 | Mmp16        | -1 | 13  | 0.62  | 9    | 0.61  |   |
| 6424 | Mpp6         | -1 | 58  | 4.53  | 87   | 4.51  |   |
| 6425 | Naa38        | -1 | 23  | 12.22 | 21   | 12.18 |   |
| 6426 | Naprt1       | -1 | 25  | 3.79  | 30   | 3.78  |   |
| 6427 | Ndufaf6      | -1 | 28  | 3.98  | 38   | 3.97  |   |
| 6428 | Ndufb9       | -1 | 93  | 46.29 | 128  | 46.14 |   |
| 6429 | Nrg2         | -1 | 23  | 0.34  | 30   | 0.34  |   |
| 6430 | Nt5dc3       | -1 | 27  | 3.38  | 37   | 3.37  |   |
| 6431 | Nup37        | -1 | 31  | 3.04  | 59   | 3.03  |   |
| 6432 | Olfml2b      | -1 | 95  | 10.44 | 126  | 10.4  |   |
| 6433 | Osbpl10      | -1 | 21  | 1.2   | 34   | 1.2   |   |
| 6434 | Pcsk9        | -1 | 5   | 0.33  | 4    | 0.32  |   |
| 6435 | Phf6_2       | -1 | 98  | 10.93 | 134  | 10.9  |   |
| 6436 | Ppic         | -1 | 51  | 12.04 | 89   | 12    |   |
| 6437 | Ptger2       | -1 | 14  | 2.22  | 18   | 2.21  |   |
| 6438 | Ptger3       | -1 | 8   | 0.53  | 13   | 0.53  |   |
| 6439 | Pus10        | -1 | 140 | 4.45  | 198  | 4.44  |   |
| 6440 | Rap1gap      | -1 | 6   | 0.33  | 4    | 0.33  |   |
| 6441 | Rbl2         | -1 | 213 | 12.74 | 320  | 12.7  |   |
| 6442 | Rfc2         | -1 | 45  | 8.54  | 52   | 8.51  |   |
| 6443 | RGD1307704   | -1 | 0   | 0.42  | 0    | 0.42  |   |
| 6444 | RGD1311745   | -1 | 12  | 4.62  | 18   | 4.61  |   |
| 6445 | RGD1564719   | -1 | 14  | 2.39  | 19   | 2.38  |   |
| 6446 | Rnf182       | -1 | 12  | 1.78  | 19   | 1.78  |   |
| 6447 | Sdpr         | -1 | 86  | 9.88  | 122  | 9.85  |   |
| 6448 | Sf3b2        | -1 | 512 | 56.26 | 680  | 56.09 |   |
| 6449 | Slc37a1      | -1 | 5   | 0.37  | 6    | 0.37  |   |
| 6450 | Smim12       | -1 | 21  | 7.75  | 30   | 7.73  |   |
| 6451 | SNORD12_2    | -1 | 0   | 24.41 | 0    | 24.33 |   |
| 6452 | SNORD14_3    | -1 | 0   | 25.26 | 0    | 25.18 |   |
| 6453 | SNORD65_1    | -1 | 3   | 15.09 | 4    | 15.04 |   |
| 6454 | Sstr3        | -1 | 7   | 0.56  | 8    | 0.56  |   |
| 6455 | Tlcd2        | -1 | 4   | 0.51  | 4    | 0.51  |   |
| 6456 | Tlk1_2       | -1 | 0   | 0.8   | 1    | 0.8   |   |
| 6457 | Tp53rk       | -1 | 9   | 1.74  | 12   | 1.74  |   |
| 6458 | Trib1        | -1 | 11  | 1.65  | 14   | 1.65  |   |
| 6459 | Trmt5        | -1 | 39  | 4.27  | 55   | 4.26  |   |
| 6460 | Trub2        | -1 | 74  | 14.26 | 94   | 14.21 |   |
| 6461 | Ube2q2l      | -1 | 9   | 2.14  | 12   | 2.13  |   |
| 6462 | Wbp11_1      | -1 | 2   | 19.43 | 3    | 19.36 |   |
| 6463 | Wfdc1        | -1 | 4   | 0.86  | 4    | 0.86  |   |
| 6464 | Wif1         | -1 | 4   | 0.48  | 7    | 0.48  |   |
| 6465 | Zbtb42       | -1 | 15  | 3.19  | 20   | 3.18  |   |
| 6466 | Zfp74_1      | -1 | 0   | 0.53  | 0    | 0.53  |   |
| 6467 | Zmym1        | -1 | 30  | 1.98  | 42   | 1.97  |   |



Supplemental Table 3  
 FSH + Ad-E versus FSH + Ad-FOXO1(A3), 24 hours

|      | A               | B     | C    | D      | E    | F      | G |
|------|-----------------|-------|------|--------|------|--------|---|
| 6468 | Zmym6nb         | -1    | 21   | 6.32   | 31   | 6.3    |   |
| 6469 | AABR07000550.1  | -1    | 3    | 2.57   | 2    | 2.56   |   |
| 6470 | Cacng4          | -1    | 12   | 0.55   | 18   | 0.55   |   |
| 6471 | Dlgap4          | -1    | 371  | 20.61  | 501  | 20.55  |   |
| 6472 | Mfap5           | -1    | 19   | 4.99   | 24   | 4.98   |   |
| 6473 | Rfx8            | -1    | 14   | 0.61   | 16   | 0.6    |   |
| 6474 | Ube3d           | -1    | 47   | 1.17   | 96   | 1.17   |   |
| 6475 | Hnrnp1          | -1    | 838  | 129.25 | 1129 | 128.8  |   |
| 6476 | Sp1             | -1    | 313  | 14.27  | 420  | 14.22  |   |
| 6477 | Yeats2          | -1    | 339  | 15.75  | 421  | 15.68  |   |
| 6478 | Saraf           | -1    | 238  | 43.99  | 313  | 43.8   |   |
| 6479 | Tshz1           | -1    | 461  | 52.74  | 621  | 52.49  |   |
| 6480 | Dpagt1          | -1    | 161  | 22.14  | 216  | 22.04  |   |
| 6481 | Sec16a          | -1    | 601  | 22.77  | 787  | 22.66  |   |
| 6482 | Zhx3            | -1.01 | 145  | 13.37  | 191  | 13.3   |   |
| 6483 | Man2b1          | -1.01 | 427  | 41.9   | 566  | 41.68  |   |
| 6484 | Masp1           | -1.01 | 6273 | 317.31 | 7998 | 315.65 |   |
| 6485 | Usp33           | -1.01 | 374  | 22.51  | 553  | 22.39  |   |
| 6486 | Aldh7a1         | -1.01 | 244  | 40.53  | 345  | 40.3   |   |
| 6487 | Mttr11          | -1.01 | 130  | 13.75  | 161  | 13.67  |   |
| 6488 | Nans            | -1.01 | 115  | 18.21  | 152  | 18.11  |   |
| 6489 | Pnpla8          | -1.01 | 121  | 16     | 184  | 15.91  |   |
| 6490 | Smarce1         | -1.01 | 391  | 39.15  | 564  | 38.93  |   |
| 6491 | Smtn            | -1.01 | 104  | 11.28  | 146  | 11.21  |   |
| 6492 | Mdc1            | -1.01 | 121  | 7.78   | 162  | 7.74   |   |
| 6493 | Tceb2           | -1.01 | 92   | 61.47  | 112  | 61.12  |   |
| 6494 | Aars            | -1.01 | 405  | 39.54  | 533  | 39.32  |   |
| 6495 | Vangl1          | -1.01 | 114  | 6.58   | 155  | 6.54   |   |
| 6496 | Hnrnp11         | -1.01 | 256  | 37.1   | 343  | 36.88  |   |
| 6497 | Adsl            | -1.01 | 156  | 16.32  | 193  | 16.22  |   |
| 6498 | Ppp1r26         | -1.01 | 84   | 9.79   | 112  | 9.74   |   |
| 6499 | Pcgf3           | -1.01 | 155  | 21.34  | 241  | 21.21  |   |
| 6500 | Nudt3           | -1.01 | 254  | 29.41  | 324  | 29.23  |   |
| 6501 | Rela            | -1.01 | 244  | 34.24  | 325  | 34.02  |   |
| 6502 | Mapre2          | -1.01 | 68   | 12.69  | 86   | 12.61  |   |
| 6503 | Zswim6          | -1.01 | 90   | 11.36  | 131  | 11.29  |   |
| 6504 | LOC100911485    | -1.01 | 102  | 20.67  | 135  | 20.54  |   |
| 6505 | Hras            | -1.01 | 63   | 19.31  | 81   | 19.18  |   |
| 6506 | Cnm4            | -1.01 | 76   | 5.42   | 101  | 5.39   |   |
| 6507 | Snx19           | -1.01 | 229  | 13.8   | 302  | 13.71  |   |
| 6508 | Sort1           | -1.01 | 389  | 18.94  | 516  | 18.81  |   |
| 6509 | Lix1l           | -1.01 | 153  | 13.98  | 210  | 13.89  |   |
| 6510 | LOC100360638_2  | -1.01 | 52   | 9.79   | 68   | 9.73   |   |
| 6511 | Trim3           | -1.01 | 80   | 8.03   | 129  | 7.97   |   |
| 6512 | Cdk10           | -1.01 | 81   | 10.07  | 120  | 10     |   |
| 6513 | ENSRNOG00000050 | -1.01 | 164  | 10.5   | 227  | 10.43  |   |
| 6514 | Dctn6           | -1.01 | 72   | 19.46  | 93   | 19.32  |   |
| 6515 | Golt1b          | -1.01 | 125  | 14.21  | 179  | 14.1   |   |
| 6516 | Parp6           | -1.01 | 179  | 15.68  | 267  | 15.56  |   |
| 6517 | Dusp6           | -1.01 | 55   | 7.23   | 73   | 7.18   |   |
| 6518 | Eef1d           | -1.01 | 184  | 29.62  | 248  | 29.39  |   |
| 6519 | Aplf            | -1.01 | 1429 | 15.03  | 1898 | 14.92  |   |
| 6520 | Slc39a13        | -1.01 | 52   | 7.81   | 75   | 7.75   |   |
| 6521 | Ubr1            | -1.01 | 159  | 9.44   | 213  | 9.36   |   |

Supplemental Table 3  
 FSH + Ad-E versus FSH + Ad-FOXO1(A3), 24 hours

|      | A             | B     | C    | D      | E    | F      | G |
|------|---------------|-------|------|--------|------|--------|---|
| 6522 | LOC103692716  | -1.01 | 11   | 46.6   | 8    | 46.23  |   |
| 6523 | Skiv2l2       | -1.01 | 195  | 15.11  | 265  | 14.98  |   |
| 6524 | Sil1          | -1.01 | 95   | 10.9   | 116  | 10.81  |   |
| 6525 | Cdk17         | -1.01 | 85   | 4.83   | 96   | 4.79   |   |
| 6526 | Kdelr3        | -1.01 | 54   | 14.88  | 70   | 14.76  |   |
| 6527 | Eif4h         | -1.01 | 562  | 71.87  | 768  | 71.28  |   |
| 6528 | Gnl3l         | -1.01 | 204  | 15.25  | 278  | 15.12  |   |
| 6529 | Srpr          | -1.01 | 395  | 54.56  | 515  | 54.09  |   |
| 6530 | Stxbp4        | -1.01 | 86   | 6.79   | 102  | 6.73   |   |
| 6531 | Zfp68         | -1.01 | 152  | 10.52  | 200  | 10.42  |   |
| 6532 | Gpkow         | -1.01 | 96   | 7.98   | 130  | 7.91   |   |
| 6533 | Vps53         | -1.01 | 209  | 17.03  | 297  | 16.88  |   |
| 6534 | Nedd8         | -1.01 | 160  | 60.65  | 203  | 60.12  |   |
| 6535 | Zfp18         | -1.01 | 52   | 9.32   | 79   | 9.23   |   |
| 6536 | Faf2          | -1.01 | 257  | 18.05  | 359  | 17.89  |   |
| 6537 | Mrps14        | -1.01 | 47   | 9.07   | 61   | 8.99   |   |
| 6538 | Fam193b       | -1.01 | 273  | 14.01  | 426  | 13.88  |   |
| 6539 | Ola1          | -1.01 | 107  | 17.85  | 140  | 17.68  |   |
| 6540 | Srsf11        | -1.01 | 355  | 34.28  | 533  | 33.97  |   |
| 6541 | Zc3h3         | -1.01 | 137  | 8.96   | 180  | 8.88   |   |
| 6542 | Mier1         | -1.01 | 271  | 14.3   | 379  | 14.17  |   |
| 6543 | Kmt2b         | -1.01 | 309  | 12.72  | 407  | 12.6   |   |
| 6544 | Zfp414        | -1.01 | 45   | 12.93  | 57   | 12.81  |   |
| 6545 | Pxn           | -1.01 | 144  | 11.36  | 177  | 11.25  |   |
| 6546 | Ttll4         | -1.01 | 122  | 11.52  | 179  | 11.41  |   |
| 6547 | Ankrd27       | -1.01 | 154  | 9.35   | 201  | 9.26   |   |
| 6548 | Zfp775        | -1.01 | 66   | 3.46   | 112  | 3.43   |   |
| 6549 | Eml2          | -1.01 | 150  | 14.25  | 204  | 14.11  |   |
| 6550 | Enpp4         | -1.01 | 109  | 8.39   | 147  | 8.31   |   |
| 6551 | Ythdc1        | -1.01 | 231  | 21.1   | 319  | 20.89  |   |
| 6552 | Nkd1          | -1.01 | 157  | 14.45  | 207  | 14.3   |   |
| 6553 | Sart1         | -1.01 | 138  | 18.23  | 186  | 18.04  |   |
| 6554 | Stx4          | -1.01 | 114  | 31.86  | 156  | 31.53  |   |
| 6555 | Zfp131        | -1.01 | 122  | 15.24  | 181  | 15.08  |   |
| 6556 | Ano6          | -1.01 | 486  | 24.21  | 659  | 23.95  |   |
| 6557 | Cpsf1         | -1.01 | 231  | 17.12  | 299  | 16.93  |   |
| 6558 | Ywhae         | -1.01 | 1175 | 227.91 | 1573 | 225.37 |   |
| 6559 | Commd6        | -1.01 | 56   | 12.35  | 71   | 12.21  |   |
| 6560 | LOC691170     | -1.01 | 38   | 4.82   | 57   | 4.76   |   |
| 6561 | Rnf214        | -1.01 | 92   | 9.24   | 123  | 9.14   |   |
| 6562 | Arfp1         | -1.01 | 113  | 11.98  | 148  | 11.84  |   |
| 6563 | Fam149a       | -1.01 | 45   | 2.06   | 48   | 2.03   |   |
| 6564 | Hebp2         | -1.01 | 35   | 9.81   | 45   | 9.7    |   |
| 6565 | Irf2bp1       | -1.01 | 93   | 12.46  | 123  | 12.32  |   |
| 6566 | Mrpl43        | -1.01 | 34   | 13.96  | 43   | 13.8   |   |
| 6567 | Rn60_5_0791.1 | -1.01 | 136  | 8.67   | 212  | 8.58   |   |
| 6568 | Ptpn23        | -1.01 | 255  | 17.05  | 347  | 16.85  |   |
| 6569 | Synj2bp       | -1.01 | 251  | 13.33  | 324  | 13.18  |   |
| 6570 | Dab2ip        | -1.01 | 183  | 8.8    | 246  | 8.7    |   |
| 6571 | St3gal1       | -1.01 | 1422 | 84.49  | 1882 | 83.52  |   |
| 6572 | G3bp1         | -1.01 | 537  | 28.14  | 706  | 27.82  |   |
| 6573 | Cdc42se1      | -1.01 | 157  | 20.24  | 207  | 20.01  |   |
| 6574 | Zfr           | -1.01 | 530  | 30.64  | 734  | 30.28  |   |
| 6575 | Iltfg1        | -1.01 | 424  | 43.29  | 580  | 42.78  |   |

Supplemental Table 3  
 FSH + Ad-E versus FSH + Ad-FOXO1(A3), 24 hours

|      | A            | B     | C   | D      | E   | F      | G |
|------|--------------|-------|-----|--------|-----|--------|---|
| 6576 | Strn4        | -1.01 | 320 | 21.77  | 416 | 21.5   |   |
| 6577 | Ikzf5        | -1.01 | 20  | 3.65   | 31  | 3.61   |   |
| 6578 | Mcm4         | -1.01 | 120 | 15.18  | 144 | 15     |   |
| 6579 | Mthfd2       | -1.01 | 27  | 4.92   | 39  | 4.86   |   |
| 6580 | Pdhx         | -1.01 | 40  | 3.71   | 50  | 3.66   |   |
| 6581 | Fbxo18       | -1.01 | 485 | 40.7   | 640 | 40.19  |   |
| 6582 | Cenpj        | -1.01 | 76  | 4.89   | 93  | 4.83   |   |
| 6583 | Eif4e        | -1.01 | 164 | 23.63  | 235 | 23.33  |   |
| 6584 | RGD1565775   | -1.01 | 275 | 22.99  | 388 | 22.69  |   |
| 6585 | Atg2b        | -1.01 | 247 | 8.54   | 345 | 8.43   |   |
| 6586 | Amer1        | -1.01 | 28  | 2.52   | 33  | 2.48   |   |
| 6587 | Spast        | -1.01 | 118 | 5.92   | 148 | 5.84   |   |
| 6588 | As3mt        | -1.01 | 100 | 5.63   | 106 | 5.56   |   |
| 6589 | Cib1         | -1.01 | 86  | 30.89  | 116 | 30.49  |   |
| 6590 | LOC100365902 | -1.01 | 55  | 16.08  | 61  | 15.87  |   |
| 6591 | Srsf9        | -1.01 | 202 | 49.55  | 273 | 48.9   |   |
| 6592 | LOC100911238 | -1.01 | 1   | 44.26  | 0   | 43.66  |   |
| 6593 | Rwdd4        | -1.01 | 101 | 11.76  | 139 | 11.6   |   |
| 6594 | Phc1         | -1.01 | 254 | 21.44  | 336 | 21.15  |   |
| 6595 | Cd99l2_2     | -1.01 | 108 | 44.59  | 130 | 43.96  |   |
| 6596 | Cep164       | -1.01 | 125 | 7.6    | 180 | 7.49   |   |
| 6597 | Ncoa2        | -1.01 | 226 | 14.98  | 303 | 14.77  |   |
| 6598 | Zzz3         | -1.01 | 347 | 16.85  | 480 | 16.61  |   |
| 6599 | Gatad2b      | -1.01 | 269 | 19.45  | 376 | 19.17  |   |
| 6600 | Klhl13       | -1.01 | 94  | 9.98   | 133 | 9.83   |   |
| 6601 | Mcee         | -1.01 | 27  | 9.8    | 37  | 9.66   |   |
| 6602 | Pura         | -1.01 | 42  | 18.37  | 56  | 18.11  |   |
| 6603 | Nsrp1        | -1.01 | 83  | 7.11   | 114 | 7.01   |   |
| 6604 | Tm2d3        | -1.01 | 39  | 10.29  | 49  | 10.14  |   |
| 6605 | Lig4         | -1.02 | 107 | 9.64   | 148 | 9.5    |   |
| 6606 | Rmnd5b_2     | -1.02 | 1   | 25.21  | 3   | 24.83  |   |
| 6607 | Zfp644       | -1.02 | 509 | 20     | 740 | 19.69  |   |
| 6608 | Med23        | -1.02 | 216 | 14.25  | 298 | 14.03  |   |
| 6609 | Gorab        | -1.02 | 56  | 5.57   | 76  | 5.49   |   |
| 6610 | Commd8       | -1.02 | 45  | 10.73  | 57  | 10.56  |   |
| 6611 | Trappc9      | -1.02 | 235 | 9.54   | 300 | 9.4    |   |
| 6612 | Ndufa13_2    | -1.02 | 168 | 140.38 | 207 | 138.21 |   |
| 6613 | Psmd5        | -1.02 | 170 | 23.23  | 229 | 22.87  |   |
| 6614 | Exosc10      | -1.02 | 200 | 18.2   | 262 | 17.92  |   |
| 6615 | Elovl6_2     | -1.02 | 36  | 17.37  | 55  | 17.1   |   |
| 6616 | Eci3         | -1.02 | 237 | 27.8   | 290 | 27.35  |   |
| 6617 | C1d          | -1.02 | 55  | 4.24   | 79  | 4.17   |   |
| 6618 | Ect2         | -1.02 | 52  | 3.41   | 64  | 3.35   |   |
| 6619 | Msantd2      | -1.02 | 173 | 8.26   | 343 | 8.13   |   |
| 6620 | Rdh10        | -1.02 | 27  | 2.34   | 35  | 2.3    |   |
| 6621 | Acaa1a       | -1.02 | 95  | 21.13  | 122 | 20.79  |   |
| 6622 | Gpr137b      | -1.02 | 80  | 2.78   | 131 | 2.73   |   |
| 6623 | Idua         | -1.02 | 306 | 37.3   | 387 | 36.69  |   |
| 6624 | Polr3g       | -1.02 | 28  | 2.06   | 40  | 2.03   |   |
| 6625 | Rfc4         | -1.02 | 43  | 11.63  | 61  | 11.44  |   |
| 6626 | Sifn3        | -1.02 | 21  | 1.31   | 27  | 1.28   |   |
| 6627 | Rbm26        | -1.02 | 385 | 16.96  | 528 | 16.68  |   |
| 6628 | Lrrc8b       | -1.02 | 114 | 14.72  | 147 | 14.47  |   |
| 6629 | Cars         | -1.02 | 112 | 10.99  | 152 | 10.81  |   |

Supplemental Table 3  
 FSH + Ad-E versus FSH + Ad-FOXO1(A3), 24 hours

|      | A            | B     | C    | D      | E    | F      | G |
|------|--------------|-------|------|--------|------|--------|---|
| 6630 | Chsy1        | -1.02 | 684  | 61.15  | 942  | 60.11  |   |
| 6631 | Manbal       | -1.02 | 125  | 36.11  | 161  | 35.49  |   |
| 6632 | Cpne1        | -1.02 | 0    | 5.58   | 0    | 5.49   |   |
| 6633 | Vps4a        | -1.02 | 129  | 19.54  | 190  | 19.21  |   |
| 6634 | Sppl2a       | -1.02 | 48   | 9.79   | 84   | 9.62   |   |
| 6635 | Fbxw11       | -1.02 | 358  | 22.85  | 448  | 22.46  |   |
| 6636 | Ppp6c        | -1.02 | 153  | 24.43  | 208  | 24.01  |   |
| 6637 | Ptcd3        | -1.02 | 170  | 15.01  | 230  | 14.75  |   |
| 6638 | Mars         | -1.02 | 182  | 20.69  | 244  | 20.33  |   |
| 6639 | Bcl9l        | -1.02 | 270  | 14.33  | 340  | 14.08  |   |
| 6640 | Gigyf1       | -1.02 | 124  | 11.12  | 177  | 10.93  |   |
| 6641 | Clint1       | -1.02 | 341  | 26.89  | 480  | 26.42  |   |
| 6642 | Clpb         | -1.02 | 72   | 7.86   | 103  | 7.72   |   |
| 6643 | Ralgds       | -1.02 | 50   | 5.01   | 67   | 4.92   |   |
| 6644 | Mgrn1        | -1.02 | 337  | 42.17  | 457  | 41.41  |   |
| 6645 | Setd8        | -1.02 | 122  | 50.07  | 182  | 49.17  |   |
| 6646 | Rnf216       | -1.02 | 419  | 18.35  | 553  | 18.02  |   |
| 6647 | Osbpl9       | -1.02 | 347  | 34.23  | 513  | 33.6   |   |
| 6648 | Tube1        | -1.02 | 40   | 2.04   | 45   | 2.01   |   |
| 6649 | Apbb2        | -1.02 | 18   | 9.15   | 22   | 8.98   |   |
| 6650 | Dph7         | -1.02 | 39   | 4.02   | 53   | 3.95   |   |
| 6651 | Ebp          | -1.02 | 38   | 10.99  | 57   | 10.79  |   |
| 6652 | Fen1         | -1.02 | 42   | 8      | 53   | 7.85   |   |
| 6653 | Hddc2        | -1.02 | 24   | 4.36   | 47   | 4.28   |   |
| 6654 | Klf11        | -1.02 | 95   | 7.66   | 137  | 7.52   |   |
| 6655 | Rad23a       | -1.02 | 152  | 28.82  | 196  | 28.28  |   |
| 6656 | Rnf169       | -1.02 | 74   | 5.56   | 102  | 5.45   |   |
| 6657 | Sergef       | -1.02 | 67   | 4.01   | 98   | 3.94   |   |
| 6658 | LOC100361537 | -1.02 | 201  | 35.88  | 276  | 35.21  |   |
| 6659 | Zfp688       | -1.02 | 22   | 7      | 22   | 6.87   |   |
| 6660 | Zranb3       | -1.02 | 401  | 17.94  | 554  | 17.6   |   |
| 6661 | Mical2       | -1.02 | 1531 | 58.3   | 2111 | 57.18  |   |
| 6662 | Snx6         | -1.02 | 137  | 17.41  | 194  | 17.08  |   |
| 6663 | LOC100911664 | -1.02 | 665  | 74.61  | 893  | 73.17  |   |
| 6664 | Dnajb1       | -1.02 | 136  | 22.27  | 181  | 21.83  |   |
| 6665 | Bcl2l1       | -1.02 | 173  | 10.73  | 230  | 10.52  |   |
| 6666 | Pank1        | -1.02 | 159  | 16.35  | 231  | 16.04  |   |
| 6667 | Hadhb        | -1.02 | 189  | 33.47  | 250  | 32.81  |   |
| 6668 | Ptptra       | -1.02 | 275  | 23.63  | 385  | 23.16  |   |
| 6669 | Phf23        | -1.02 | 138  | 25.57  | 174  | 25.06  |   |
| 6670 | Pcbp4        | -1.02 | 81   | 13.25  | 102  | 12.99  |   |
| 6671 | Pcsk7        | -1.02 | 113  | 7.74   | 148  | 7.59   |   |
| 6672 | Nr2c2        | -1.02 | 136  | 14.79  | 187  | 14.5   |   |
| 6673 | Slco3a1      | -1.02 | 1034 | 63.3   | 1750 | 62.02  |   |
| 6674 | LOC100294508 | -1.02 | 447  | 33.33  | 585  | 32.66  |   |
| 6675 | Arl1         | -1.02 | 95   | 33.4   | 126  | 32.72  |   |
| 6676 | Mrps33       | -1.02 | 34   | 17.89  | 52   | 17.52  |   |
| 6677 | Polb         | -1.02 | 74   | 9.04   | 76   | 8.86   |   |
| 6678 | Huwe1        | -1.02 | 1036 | 28.24  | 1388 | 27.67  |   |
| 6679 | Brpf1        | -1.02 | 139  | 10.02  | 188  | 9.81   |   |
| 6680 | Rbbp7        | -1.02 | 666  | 122.26 | 873  | 119.71 |   |
| 6681 | Slc25a44     | -1.02 | 105  | 8.27   | 140  | 8.1    |   |
| 6682 | Mrpl38       | -1.02 | 59   | 15.26  | 74   | 14.93  |   |
| 6683 | Trip6        | -1.02 | 117  | 21.51  | 150  | 21.05  |   |

Supplemental Table 3  
 FSH + Ad-E versus FSH + Ad-FOXO1(A3), 24 hours

|      | A              | B     | C    | D       | E     | F      | G |
|------|----------------|-------|------|---------|-------|--------|---|
| 6684 | Ufl1           | -1.02 | 131  | 10.37   | 164   | 10.15  |   |
| 6685 | Ssr1           | -1.02 | 435  | 43.51   | 571   | 42.58  |   |
| 6686 | Ppp2r5a        | -1.02 | 90   | 11.3    | 106   | 11.05  |   |
| 6687 | Pgam5          | -1.02 | 105  | 17.09   | 149   | 16.71  |   |
| 6688 | LOC100911672   | -1.02 | 70   | 32.19   | 110   | 31.49  |   |
| 6689 | Ahcyl1         | -1.02 | 366  | 35.03   | 480   | 34.26  |   |
| 6690 | Etnk1          | -1.02 | 318  | 12.94   | 453   | 12.65  |   |
| 6691 | App            | -1.02 | 1316 | 122.9   | 1778  | 120.17 |   |
| 6692 | Trdmt1         | -1.02 | 30   | 2.33    | 41    | 2.28   |   |
| 6693 | AABR07035428.1 | -1.02 | 92   | 6.6     | 127   | 6.45   |   |
| 6694 | AC094643.2     | -1.02 | 26   | 10.53   | 34    | 10.29  |   |
| 6695 | AC120727.1     | -1.02 | 18   | 7.44    | 25    | 7.27   |   |
| 6696 | Acbd4          | -1.02 | 29   | 2.64    | 33    | 2.58   |   |
| 6697 | Anks3          | -1.02 | 86   | 5.3     | 112   | 5.19   |   |
| 6698 | Bcs1l          | -1.02 | 16   | 2.85    | 21    | 2.79   |   |
| 6699 | Cbx6           | -1.02 | 265  | 29.18   | 345   | 28.53  |   |
| 6700 | Coch           | -1.02 | 17   | 1.95    | 19    | 1.9    |   |
| 6701 | Gfm2           | -1.02 | 61   | 3.95    | 89    | 3.86   |   |
| 6702 | Lipt2          | -1.02 | 13   | 2.48    | 18    | 2.43   |   |
| 6703 | Lmnb2          | -1.02 | 30   | 4.55    | 41    | 4.45   |   |
| 6704 | Rabgef1        | -1.02 | 95   | 9.99    | 119   | 9.77   |   |
| 6705 | Rfxap_2        | -1.02 | 0    | 2.85    | 0     | 2.78   |   |
| 6706 | Smc2           | -1.02 | 115  | 7.01    | 152   | 6.85   |   |
| 6707 | Zbtb34         | -1.02 | 101  | 5.23    | 134   | 5.12   |   |
| 6708 | Zfp407         | -1.02 | 149  | 3.62    | 188   | 3.54   |   |
| 6709 | Znrd1as1       | -1.02 | 14   | 1.66    | 18    | 1.62   |   |
| 6710 | Prcp           | -1.02 | 127  | 17.47   | 156   | 17.08  |   |
| 6711 | Stxbp2         | -1.02 | 145  | 19.49   | 172   | 19.04  |   |
| 6712 | Dnajc10        | -1.02 | 339  | 28.77   | 459   | 28.11  |   |
| 6713 | Pds5a          | -1.02 | 303  | 17.25   | 385   | 16.86  |   |
| 6714 | Kihl22         | -1.02 | 182  | 19.08   | 247   | 18.64  |   |
| 6715 | Timeless       | -1.02 | 83   | 5.69    | 107   | 5.55   |   |
| 6716 | Smad4          | -1.02 | 318  | 48.58   | 446   | 47.46  |   |
| 6717 | Mt-cox3        | -1.02 | 8904 | 4150.86 | 11694 | 4054.5 |   |
| 6718 | RGD1311345     | -1.02 | 86   | 8.79    | 116   | 8.58   |   |
| 6719 | Arf4           | -1.02 | 520  | 109.09  | 674   | 106.55 |   |
| 6720 | Slc35e2b       | -1.02 | 68   | 7.39    | 95    | 7.22   |   |
| 6721 | Stk38          | -1.02 | 163  | 19.23   | 207   | 18.78  |   |
| 6722 | Xrcc6          | -1.02 | 84   | 5.92    | 82    | 5.78   |   |
| 6723 | Atp6v1b2       | -1.02 | 212  | 27.07   | 287   | 26.42  |   |
| 6724 | Flii           | -1.02 | 417  | 36.5    | 536   | 35.61  |   |
| 6725 | LOC294154      | -1.02 | 70   | 30.91   | 91    | 30.16  |   |
| 6726 | Rbm15          | -1.03 | 128  | 9.04    | 174   | 8.81   |   |
| 6727 | Secisbp2       | -1.03 | 137  | 11.73   | 183   | 11.45  |   |
| 6728 | Brd1           | -1.03 | 346  | 18.75   | 487   | 18.29  |   |
| 6729 | Cnot11         | -1.03 | 79   | 13.21   | 104   | 12.88  |   |
| 6730 | Dgke           | -1.03 | 36   | 2.73    | 55    | 2.66   |   |
| 6731 | Gm17296        | -1.03 | 59   | 1.76    | 73    | 1.72   |   |
| 6732 | Iqgap3         | -1.03 | 52   | 2.87    | 62    | 2.8    |   |
| 6733 | Slc39a5        | -1.03 | 46   | 5.89    | 61    | 5.74   |   |
| 6734 | Socs3          | -1.03 | 23   | 9.65    | 30    | 9.41   |   |
| 6735 | Ubash3b        | -1.03 | 249  | 9.52    | 333   | 9.28   |   |
| 6736 | Prkacb         | -1.03 | 85   | 25.49   | 133   | 24.85  |   |
| 6737 | Rac1           | -1.03 | 350  | 107.79  | 491   | 105.06 |   |

Supplemental Table 3  
 FSH + Ad-E versus FSH + Ad-FOXO1(A3), 24 hours

|      | A              | B     | C   | D     | E   | F     | G |
|------|----------------|-------|-----|-------|-----|-------|---|
| 6738 | Hsd17b12       | -1.03 | 128 | 20.56 | 179 | 20.04 |   |
| 6739 | Tmem230        | -1.03 | 188 | 38.4  | 256 | 37.43 |   |
| 6740 | Zbtb22         | -1.03 | 56  | 7.89  | 73  | 7.69  |   |
| 6741 | Tex2           | -1.03 | 135 | 5.66  | 206 | 5.52  |   |
| 6742 | Apbb1          | -1.03 | 104 | 13.6  | 139 | 13.25 |   |
| 6743 | Dscr3          | -1.03 | 141 | 17.09 | 190 | 16.64 |   |
| 6744 | Smarcd3        | -1.03 | 205 | 28.57 | 262 | 27.83 |   |
| 6745 | Tctex1d2_1     | -1.03 | 32  | 13.53 | 43  | 13.18 |   |
| 6746 | Ykt6           | -1.03 | 82  | 21.78 | 110 | 21.22 |   |
| 6747 | Polr3a         | -1.03 | 137 | 7.38  | 176 | 7.18  |   |
| 6748 | Hectd4         | -1.03 | 379 | 9.47  | 508 | 9.22  |   |
| 6749 | Rfc3           | -1.03 | 50  | 11.99 | 61  | 11.68 |   |
| 6750 | Zfp598         | -1.03 | 180 | 19.02 | 247 | 18.51 |   |
| 6751 | Rtfdc1         | -1.03 | 231 | 33.92 | 304 | 33.02 |   |
| 6752 | Brca2          | -1.03 | 64  | 1.86  | 80  | 1.81  |   |
| 6753 | Rnh1           | -1.03 | 239 | 40.98 | 297 | 39.89 |   |
| 6754 | Pon2           | -1.03 | 59  | 23.93 | 60  | 23.29 |   |
| 6755 | Ciapi1         | -1.03 | 78  | 12.32 | 101 | 11.99 |   |
| 6756 | Fbln1          | -1.03 | 77  | 8.21  | 107 | 7.98  |   |
| 6757 | Nr1d1          | -1.03 | 70  | 10.37 | 92  | 10.09 |   |
| 6758 | Epdr1          | -1.03 | 111 | 16.92 | 164 | 16.46 |   |
| 6759 | Cdv3           | -1.03 | 130 | 28.49 | 144 | 27.71 |   |
| 6760 | Cstf2          | -1.03 | 165 | 9.91  | 202 | 9.64  |   |
| 6761 | Dennd4c        | -1.03 | 216 | 10    | 311 | 9.72  |   |
| 6762 | Arhgef18       | -1.03 | 207 | 10.22 | 302 | 9.93  |   |
| 6763 | Rbbp6          | -1.03 | 298 | 13.51 | 410 | 13.14 |   |
| 6764 | Cpsf6          | -1.03 | 458 | 18.84 | 641 | 18.32 |   |
| 6765 | Ctsk           | -1.03 | 17  | 2.56  | 16  | 2.49  |   |
| 6766 | AABR07029056.1 | -1.03 | 0   | 7.67  | 0   | 7.45  |   |
| 6767 | AABR07058884.2 | -1.03 | 18  | 5.67  | 21  | 5.51  |   |
| 6768 | Apobec3b       | -1.03 | 12  | 1.85  | 17  | 1.79  |   |
| 6769 | Ddx11          | -1.03 | 10  | 1.73  | 13  | 1.68  |   |
| 6770 | Dnajc4         | -1.03 | 12  | 3.73  | 22  | 3.63  |   |
| 6771 | Entpd7_2       | -1.03 | 26  | 7.53  | 32  | 7.32  |   |
| 6772 | Fbxo4          | -1.03 | 24  | 3.63  | 39  | 3.53  |   |
| 6773 | Ggh            | -1.03 | 10  | 2.68  | 12  | 2.6   |   |
| 6774 | Gucy1b3        | -1.03 | 46  | 4.51  | 57  | 4.38  |   |
| 6775 | Habp4          | -1.03 | 40  | 4.81  | 59  | 4.67  |   |
| 6776 | Haus1_2        | -1.03 | 1   | 2.3   | 1   | 2.24  |   |
| 6777 | Klf10          | -1.03 | 50  | 6.05  | 65  | 5.88  |   |
| 6778 | LOC100912253   | -1.03 | 0   | 0.89  | 0   | 0.86  |   |
| 6779 | LOC102555083   | -1.03 | 0   | 2.26  | 0   | 2.19  |   |
| 6780 | Nr2c2ap        | -1.03 | 38  | 9.52  | 46  | 9.25  |   |
| 6781 | Nup85          | -1.03 | 65  | 9.92  | 89  | 9.64  |   |
| 6782 | Polr2k         | -1.03 | 19  | 14.01 | 32  | 13.61 |   |
| 6783 | Pou6f1         | -1.03 | 30  | 4.87  | 43  | 4.73  |   |
| 6784 | RGD1560883_1   | -1.03 | 24  | 2.93  | 35  | 2.85  |   |
| 6785 | RGD1562608     | -1.03 | 62  | 0.96  | 83  | 0.93  |   |
| 6786 | SNORD36_6      | -1.03 | 0   | 51    | 0   | 49.56 |   |
| 6787 | Tefm           | -1.03 | 25  | 4.81  | 30  | 4.68  |   |
| 6788 | Thap1          | -1.03 | 34  | 7.29  | 30  | 7.09  |   |
| 6789 | Wdr53          | -1.03 | 16  | 2.48  | 18  | 2.41  |   |
| 6790 | Cit            | -1.03 | 41  | 1.43  | 51  | 1.39  |   |
| 6791 | Zc3h4          | -1.03 | 378 | 20.78 | 502 | 20.19 |   |

Supplemental Table 3  
 FSH + Ad-E versus FSH + Ad-FOXO1(A3), 24 hours

|      | A          | B     | C   | D      | E   | F      | G |
|------|------------|-------|-----|--------|-----|--------|---|
| 6792 | Pfkfb3     | -1.03 | 77  | 5.14   | 99  | 4.99   |   |
| 6793 | Lyp1a1     | -1.03 | 158 | 19.06  | 218 | 18.51  |   |
| 6794 | Tcf12      | -1.03 | 362 | 23.69  | 549 | 23     |   |
| 6795 | Csrp2bp    | -1.03 | 84  | 5.46   | 105 | 5.3    |   |
| 6796 | Vps8       | -1.03 | 141 | 9.99   | 186 | 9.7    |   |
| 6797 | Wdfy3      | -1.03 | 703 | 20.9   | 935 | 20.28  |   |
| 6798 | Zc3h10     | -1.03 | 48  | 8.2    | 67  | 7.96   |   |
| 6799 | Pdia3      | -1.03 | 776 | 277.95 | 920 | 269.68 |   |
| 6800 | Tet2       | -1.03 | 186 | 6.11   | 251 | 5.93   |   |
| 6801 | Bnip3l     | -1.03 | 578 | 56.7   | 803 | 55     |   |
| 6802 | Abi3bp     | -1.03 | 215 | 15.11  | 338 | 14.65  |   |
| 6803 | Casp2      | -1.03 | 206 | 19.13  | 281 | 18.55  |   |
| 6804 | Psm1       | -1.03 | 529 | 57.4   | 705 | 55.67  |   |
| 6805 | Dpp8       | -1.03 | 377 | 30.42  | 507 | 29.5   |   |
| 6806 | Ap3d1      | -1.03 | 517 | 36.91  | 684 | 35.78  |   |
| 6807 | Cox7b      | -1.03 | 35  | 48.48  | 48  | 47     |   |
| 6808 | Dnajc18    | -1.03 | 85  | 12.42  | 133 | 12.04  |   |
| 6809 | Mfsd1      | -1.03 | 135 | 19.66  | 179 | 19.06  |   |
| 6810 | Agps       | -1.03 | 75  | 10.1   | 125 | 9.79   |   |
| 6811 | Sp110      | -1.03 | 137 | 22.21  | 172 | 21.52  |   |
| 6812 | Il3ra      | -1.03 | 49  | 6.97   | 52  | 6.75   |   |
| 6813 | Rbmx       | -1.03 | 121 | 19.77  | 175 | 19.16  |   |
| 6814 | Tpd52      | -1.03 | 117 | 13.66  | 158 | 13.24  |   |
| 6815 | Cdc5l      | -1.03 | 287 | 34.21  | 377 | 33.14  |   |
| 6816 | Dyrk1b     | -1.03 | 141 | 17.67  | 182 | 17.12  |   |
| 6817 | Sept10     | -1.03 | 93  | 10.79  | 134 | 10.45  |   |
| 6818 | Ube2b      | -1.03 | 285 | 54.75  | 439 | 53.04  |   |
| 6819 | RGD735065  | -1.03 | 154 | 31.28  | 190 | 30.3   |   |
| 6820 | Fam73a     | -1.03 | 80  | 8.84   | 118 | 8.56   |   |
| 6821 | Slc25a4    | -1.03 | 370 | 103.57 | 487 | 100.3  |   |
| 6822 | Zdhhc2     | -1.03 | 194 | 31.09  | 255 | 30.11  |   |
| 6823 | RGD1561149 | -1.03 | 62  | 4.27   | 80  | 4.14   |   |
| 6824 | Taf6       | -1.03 | 189 | 22.32  | 243 | 21.6   |   |
| 6825 | Cnot2      | -1.03 | 222 | 30.28  | 304 | 29.31  |   |
| 6826 | Ahcyl2     | -1.03 | 96  | 3.64   | 128 | 3.52   |   |
| 6827 | Irgq       | -1.03 | 22  | 3.09   | 25  | 2.99   |   |
| 6828 | Irfg2      | -1.03 | 47  | 5.51   | 69  | 5.33   |   |
| 6829 | Pygl       | -1.03 | 24  | 2.14   | 37  | 2.07   |   |
| 6830 | Ap3s2      | -1.03 | 100 | 24.86  | 138 | 24.05  |   |
| 6831 | Ccdc106    | -1.03 | 33  | 6.03   | 45  | 5.84   |   |
| 6832 | Fbxw9      | -1.03 | 40  | 6.44   | 48  | 6.23   |   |
| 6833 | Fchsd2     | -1.03 | 143 | 5.51   | 170 | 5.33   |   |
| 6834 | Hinfp      | -1.03 | 59  | 10.15  | 74  | 9.82   |   |
| 6835 | Odf1       | -1.03 | 45  | 3.47   | 56  | 3.35   |   |
| 6836 | Rbx1       | -1.03 | 148 | 56.47  | 201 | 54.63  |   |
| 6837 | Zfp612     | -1.03 | 48  | 6.07   | 80  | 5.87   |   |
| 6838 | Zfp64      | -1.03 | 83  | 7.44   | 113 | 7.2    |   |
| 6839 | Rpl12      | -1.03 | 45  | 118.01 | 51  | 114.1  |   |
| 6840 | Atp6v1g1   | -1.03 | 186 | 58.66  | 242 | 56.71  |   |
| 6841 | Epm2aip1   | -1.03 | 370 | 18.33  | 479 | 17.72  |   |
| 6842 | Pign       | -1.03 | 120 | 7.56   | 148 | 7.31   |   |
| 6843 | Plekhh3    | -1.03 | 45  | 4.97   | 57  | 4.8    |   |
| 6844 | Desi1      | -1.03 | 63  | 10.48  | 85  | 10.13  |   |
| 6845 | B2m        | -1.03 | 319 | 63.02  | 414 | 60.89  |   |

Supplemental Table 3  
 FSH + Ad-E versus FSH + Ad-FOXO1(A3), 24 hours

|      | A              | B     | C    | D      | E    | F      | G |
|------|----------------|-------|------|--------|------|--------|---|
| 6846 | Gid8           | -1.03 | 107  | 26.82  | 139  | 25.92  |   |
| 6847 | Naa60          | -1.04 | 27   | 13.97  | 27   | 13.49  |   |
| 6848 | Rheb           | -1.04 | 138  | 38.06  | 222  | 36.76  |   |
| 6849 | AABR07043829.2 | -1.04 | 50   | 5.75   | 64   | 5.55   |   |
| 6850 | Brms1l         | -1.04 | 0    | 2.62   | 0    | 2.53   |   |
| 6851 | Cryzl1         | -1.04 | 65   | 4.75   | 114  | 4.59   |   |
| 6852 | Lamtor4        | -1.04 | 10   | 14.36  | 7    | 13.87  |   |
| 6853 | Pcnt           | -1.04 | 178  | 5.52   | 230  | 5.33   |   |
| 6854 | Scrn3          | -1.04 | 63   | 5.5    | 71   | 5.31   |   |
| 6855 | Sec22a         | -1.04 | 80   | 10.63  | 109  | 10.26  |   |
| 6856 | Hmgxb3         | -1.04 | 99   | 7.65   | 144  | 7.39   |   |
| 6857 | Ccar2          | -1.04 | 377  | 36.01  | 492  | 34.76  |   |
| 6858 | Ghitm          | -1.04 | 233  | 59.53  | 323  | 57.47  |   |
| 6859 | Dicer1         | -1.04 | 252  | 8.45   | 323  | 8.16   |   |
| 6860 | LOC100360260_1 | -1.04 | 125  | 50.6   | 169  | 48.84  |   |
| 6861 | Gpsm1          | -1.04 | 157  | 11.27  | 214  | 10.88  |   |
| 6862 | Btaf1          | -1.04 | 201  | 7.35   | 281  | 7.09   |   |
| 6863 | Sbf1           | -1.04 | 419  | 22.47  | 540  | 21.68  |   |
| 6864 | Actl6a         | -1.04 | 153  | 15.62  | 223  | 15.06  |   |
| 6865 | Aldh16a1       | -1.04 | 73   | 8.45   | 102  | 8.15   |   |
| 6866 | Amn1           | -1.04 | 74   | 9.07   | 114  | 8.75   |   |
| 6867 | Atp6v0e1       | -1.04 | 177  | 24.16  | 233  | 23.31  |   |
| 6868 | Dhrs7          | -1.04 | 76   | 17.39  | 104  | 16.77  |   |
| 6869 | Lrif1          | -1.04 | 44   | 3.47   | 76   | 3.34   |   |
| 6870 | Arhgef11       | -1.04 | 417  | 24.56  | 548  | 23.69  |   |
| 6871 | Chchd10        | -1.04 | 195  | 62.28  | 251  | 60.07  |   |
| 6872 | Plekhg3        | -1.04 | 116  | 8.08   | 163  | 7.79   |   |
| 6873 | Dusp18         | -1.04 | 140  | 10.14  | 182  | 9.78   |   |
| 6874 | LOC100359916   | -1.04 | 618  | 163.13 | 766  | 157.32 |   |
| 6875 | ltsn1          | -1.04 | 178  | 11.54  | 253  | 11.12  |   |
| 6876 | Cd81           | -1.04 | 1913 | 504.21 | 2531 | 486.16 |   |
| 6877 | Wdr5           | -1.04 | 149  | 21.4   | 202  | 20.63  |   |
| 6878 | Dbr1           | -1.04 | 44   | 5.86   | 56   | 5.65   |   |
| 6879 | Limd1          | -1.04 | 140  | 11.58  | 179  | 11.17  |   |
| 6880 | Msmo1          | -1.04 | 357  | 63.64  | 466  | 61.34  |   |
| 6881 | Mrps18b        | -1.04 | 58   | 10.47  | 76   | 10.09  |   |
| 6882 | Reck           | -1.04 | 161  | 11.61  | 213  | 11.19  |   |
| 6883 | Cenpf          | -1.04 | 56   | 1.87   | 73   | 1.8    |   |
| 6884 | Tceb3          | -1.04 | 245  | 23.75  | 318  | 22.87  |   |
| 6885 | Atp5j2         | -1.04 | 59   | 50.98  | 82   | 49.1   |   |
| 6886 | Lancl2         | -1.04 | 71   | 12.28  | 92   | 11.82  |   |
| 6887 | LOC680227      | -1.04 | 3179 | 14.59  | 4044 | 14.05  |   |
| 6888 | Oser1          | -1.04 | 86   | 16.31  | 108  | 15.7   |   |
| 6889 | Arfgap3        | -1.04 | 116  | 12.54  | 146  | 12.07  |   |
| 6890 | Epb41l3        | -1.04 | 126  | 6.75   | 172  | 6.49   |   |
| 6891 | Dock9          | -1.04 | 238  | 5.86   | 310  | 5.64   |   |
| 6892 | Gnai2          | -1.04 | 1048 | 169.78 | 1383 | 163.3  |   |
| 6893 | AC120712.2     | -1.04 | 8    | 2.87   | 26   | 2.76   |   |
| 6894 | Bbs4           | -1.04 | 93   | 7.07   | 126  | 6.79   |   |
| 6895 | Lca5           | -1.04 | 18   | 0.64   | 31   | 0.61   |   |
| 6896 | Ndufc1         | -1.04 | 22   | 13.2   | 24   | 12.69  |   |
| 6897 | Rad9b          | -1.04 | 29   | 1.47   | 36   | 1.41   |   |
| 6898 | Rpl30          | -1.04 | 1    | 7.28   | 4    | 7      |   |
| 6899 | Tgm2           | -1.04 | 7    | 0.72   | 10   | 0.69   |   |



Supplemental Table 3  
 FSH + Ad-E versus FSH + Ad-FOXO1(A3), 24 hours

|      | A              | B     | C   | D      | E   | F      | G |
|------|----------------|-------|-----|--------|-----|--------|---|
| 6900 | Timm44         | -1.04 | 114 | 18.48  | 160 | 17.76  |   |
| 6901 | AABR07030729.1 | -1.04 | 1   | 2.53   | 1   | 2.43   |   |
| 6902 | AC103574.4     | -1.04 | 22  | 18.37  | 22  | 17.65  |   |
| 6903 | Btg2           | -1.04 | 36  | 4.95   | 45  | 4.75   |   |
| 6904 | Celf5          | -1.04 | 10  | 0.58   | 9   | 0.56   |   |
| 6905 | Cln5           | -1.04 | 21  | 3.77   | 27  | 3.63   |   |
| 6906 | Cmc1           | -1.04 | 28  | 7.5    | 43  | 7.21   |   |
| 6907 | Commd10        | -1.04 | 60  | 12.28  | 88  | 11.8   |   |
| 6908 | Cyp2c13_1      | -1.04 | 160 | 30.58  | 202 | 29.4   |   |
| 6909 | Daam2          | -1.04 | 12  | 0.76   | 14  | 0.73   |   |
| 6910 | Ddx23          | -1.04 | 332 | 36.44  | 437 | 35.03  |   |
| 6911 | Dhrsx          | -1.04 | 63  | 6.16   | 73  | 5.92   |   |
| 6912 | Dnah11         | -1.04 | 25  | 0.19   | 25  | 0.18   |   |
| 6913 | Echdc2         | -1.04 | 8   | 1.82   | 10  | 1.75   |   |
| 6914 | Efcab7         | -1.04 | 27  | 1.18   | 30  | 1.13   |   |
| 6915 | Ereg           | -1.04 | 24  | 3.62   | 29  | 3.48   |   |
| 6916 | Gatsl3         | -1.04 | 8   | 1.6    | 11  | 1.54   |   |
| 6917 | Ilf2           | -1.04 | 126 | 15.87  | 176 | 15.26  |   |
| 6918 | LOC100360726   | -1.04 | 21  | 1.59   | 27  | 1.53   |   |
| 6919 | Lrrc48         | -1.04 | 26  | 1.4    | 32  | 1.34   |   |
| 6920 | Mmaa           | -1.04 | 25  | 1.74   | 29  | 1.67   |   |
| 6921 | Mto1           | -1.04 | 55  | 6.39   | 72  | 6.14   |   |
| 6922 | Pak1           | -1.04 | 20  | 1.5    | 22  | 1.44   |   |
| 6923 | Pla2g15        | -1.04 | 48  | 5.58   | 64  | 5.36   |   |
| 6924 | Prss12         | -1.04 | 11  | 1.01   | 10  | 0.97   |   |
| 6925 | Rbm25          | -1.04 | 20  | 10.69  | 27  | 10.28  |   |
| 6926 | RGD1560017     | -1.04 | 4   | 4.77   | 5   | 4.59   |   |
| 6927 | RT1-A3         | -1.04 | 8   | 2.52   | 6   | 2.42   |   |
| 6928 | Tfb1m          | -1.04 | 26  | 3.2    | 52  | 3.07   |   |
| 6929 | Tipin          | -1.04 | 24  | 8.99   | 31  | 8.64   |   |
| 6930 | Traip          | -1.04 | 20  | 2.31   | 27  | 2.22   |   |
| 6931 | Vamp4          | -1.04 | 85  | 3.87   | 96  | 3.72   |   |
| 6932 | Wdsub1         | -1.04 | 57  | 6.26   | 82  | 6.02   |   |
| 6933 | Ptgfrn         | -1.04 | 438 | 26.91  | 566 | 25.85  |   |
| 6934 | Abcf1          | -1.04 | 277 | 30.01  | 372 | 28.82  |   |
| 6935 | Epc1           | -1.04 | 261 | 15.87  | 351 | 15.24  |   |
| 6936 | Pcnx           | -1.04 | 418 | 16.77  | 539 | 16.1   |   |
| 6937 | Actr8          | -1.04 | 126 | 19.21  | 176 | 18.45  |   |
| 6938 | Daxx           | -1.04 | 117 | 16.1   | 157 | 15.46  |   |
| 6939 | Atp5f1_1       | -1.04 | 0   | 15.44  | 0   | 14.83  |   |
| 6940 | Far1           | -1.04 | 150 | 7.36   | 216 | 7.06   |   |
| 6941 | Ccdc91         | -1.04 | 118 | 12     | 149 | 11.52  |   |
| 6942 | Bud13          | -1.04 | 90  | 13.57  | 121 | 13.02  |   |
| 6943 | Spsb3          | -1.04 | 112 | 11.01  | 153 | 10.56  |   |
| 6944 | Pla2g12a       | -1.04 | 75  | 14.18  | 92  | 13.61  |   |
| 6945 | Tmem181        | -1.04 | 85  | 11.72  | 102 | 11.24  |   |
| 6946 | Tmem131        | -1.04 | 386 | 22.54  | 496 | 21.63  |   |
| 6947 | Nol11          | -1.04 | 147 | 17.82  | 193 | 17.09  |   |
| 6948 | Armc7          | -1.04 | 130 | 8.1    | 165 | 7.77   |   |
| 6949 | Gnb1           | -1.04 | 550 | 138.02 | 730 | 132.39 |   |
| 6950 | Anks1a         | -1.04 | 417 | 16.42  | 542 | 15.75  |   |
| 6951 | Man2a2         | -1.04 | 275 | 21.76  | 349 | 20.87  |   |
| 6952 | Trim2          | -1.04 | 492 | 24.71  | 664 | 23.7   |   |
| 6953 | Lsm8           | -1.04 | 61  | 20.9   | 77  | 20.04  |   |

Supplemental Table 3  
 FSH + Ad-E versus FSH + Ad-FOXO1(A3), 24 hours

|      | A              | B     | C    | D      | E    | F      | G |
|------|----------------|-------|------|--------|------|--------|---|
| 6954 | Ehmt1          | -1.04 | 415  | 17.44  | 567  | 16.72  |   |
| 6955 | Angel1         | -1.04 | 46   | 3.13   | 62   | 3      |   |
| 6956 | Pcdhgb7        | -1.04 | 38   | 5.83   | 44   | 5.59   |   |
| 6957 | Rnf26          | -1.04 | 78   | 12.84  | 100  | 12.31  |   |
| 6958 | Slc12a6        | -1.04 | 146  | 6.6    | 194  | 6.32   |   |
| 6959 | Cfap20         | -1.04 | 49   | 11.97  | 69   | 11.47  |   |
| 6960 | Acadl          | -1.04 | 142  | 27.22  | 188  | 26.09  |   |
| 6961 | Bhlhb9         | -1.04 | 69   | 9.52   | 91   | 9.12   |   |
| 6962 | AABR07011996.1 | -1.04 | 33   | 3.42   | 41   | 3.27   |   |
| 6963 | Anln           | -1.04 | 20   | 3.35   | 24   | 3.21   |   |
| 6964 | Plekhf1        | -1.04 | 32   | 7.84   | 41   | 7.51   |   |
| 6965 | Vwa1           | -1.04 | 35   | 4.07   | 41   | 3.9    |   |
| 6966 | Cst3           | -1.04 | 467  | 254.6  | 575  | 243.79 |   |
| 6967 | Gxylt1         | -1.04 | 231  | 10.78  | 320  | 10.32  |   |
| 6968 | Pla2g4b        | -1.04 | 75   | 5.9    | 85   | 5.65   |   |
| 6969 | Pdia4          | -1.04 | 821  | 126.86 | 1068 | 121.46 |   |
| 6970 | Sec23a         | -1.04 | 215  | 17.56  | 286  | 16.81  |   |
| 6971 | Gnpat          | -1.04 | 100  | 12.28  | 134  | 11.75  |   |
| 6972 | Inpp5b         | -1.04 | 57   | 7.79   | 71   | 7.46   |   |
| 6973 | Rpl27a         | -1.04 | 150  | 112.35 | 127  | 107.56 |   |
| 6974 | Ybx3           | -1.04 | 292  | 48.57  | 376  | 46.49  |   |
| 6975 | Pdgfd          | -1.04 | 158  | 10.41  | 212  | 9.97   |   |
| 6976 | Hnrnpab_1      | -1.04 | 0    | 48.47  | 0    | 46.39  |   |
| 6977 | Hspd1          | -1.04 | 376  | 83.57  | 512  | 79.98  |   |
| 6978 | Acsf3          | -1.04 | 61   | 8.72   | 92   | 8.35   |   |
| 6979 | Afg3l1         | -1.04 | 141  | 17.41  | 181  | 16.66  |   |
| 6980 | Col4a2         | -1.04 | 101  | 7.33   | 132  | 7.02   |   |
| 6981 | Nmnat1         | -1.04 | 42   | 4.3    | 41   | 4.12   |   |
| 6982 | Prpf31         | -1.04 | 55   | 7.53   | 74   | 7.21   |   |
| 6983 | RGD1309104     | -1.04 | 62   | 5.44   | 100  | 5.21   |   |
| 6984 | Rps6kb2        | -1.04 | 28   | 5.08   | 37   | 4.86   |   |
| 6985 | Tpcn2          | -1.04 | 51   | 3.01   | 60   | 2.88   |   |
| 6986 | Mta1           | -1.05 | 317  | 32.13  | 429  | 30.74  |   |
| 6987 | Lats1          | -1.05 | 351  | 15.53  | 461  | 14.86  |   |
| 6988 | Bbs2           | -1.05 | 94   | 9.57   | 129  | 9.15   |   |
| 6989 | Ldah           | -1.05 | 100  | 9.03   | 121  | 8.64   |   |
| 6990 | Polr1a         | -1.05 | 172  | 9.27   | 235  | 8.87   |   |
| 6991 | AABR07012047.1 | -1.05 | 47   | 4.63   | 58   | 4.43   |   |
| 6992 | Ypel5          | -1.05 | 248  | 29.47  | 326  | 28.18  |   |
| 6993 | Finc           | -1.05 | 770  | 30.52  | 988  | 29.19  |   |
| 6994 | Rps14          | -1.05 | 17   | 116.72 | 9    | 111.6  |   |
| 6995 | Atp7a          | -1.05 | 175  | 8.94   | 215  | 8.55   |   |
| 6996 | Zfand3         | -1.05 | 442  | 37.6   | 629  | 35.95  |   |
| 6997 | Ttc4           | -1.05 | 76   | 5.41   | 98   | 5.17   |   |
| 6998 | AY172581.9     | -1.05 | 2074 | 796.32 | 2676 | 761.21 |   |
| 6999 | Ifngr1         | -1.05 | 159  | 26.76  | 208  | 25.58  |   |
| 7000 | Cand1          | -1.05 | 434  | 34.45  | 557  | 32.92  |   |
| 7001 | Kpna2          | -1.05 | 47   | 28.01  | 55   | 26.76  |   |
| 7002 | Acy3           | -1.05 | 42   | 9.81   | 54   | 9.37   |   |
| 7003 | Cbr4           | -1.05 | 23   | 5.58   | 27   | 5.33   |   |
| 7004 | Dera           | -1.05 | 122  | 18.86  | 140  | 18.01  |   |
| 7005 | Gtf2f2         | -1.05 | 52   | 4.5    | 77   | 4.3    |   |
| 7006 | RGD1311517     | -1.05 | 39   | 3.72   | 40   | 3.55   |   |
| 7007 | Slx4ip         | -1.05 | 64   | 2.16   | 82   | 2.07   |   |

Supplemental Table 3  
FSH + Ad-E versus FSH + Ad-FOXO1(A3), 24 hours

|      | A              | B     | C    | D     | E    | F     | G |
|------|----------------|-------|------|-------|------|-------|---|
| 7008 | Tmem79         | -1.05 | 9    | 1.07  | 14   | 1.02  |   |
| 7009 | Gcfc2          | -1.05 | 36   | 2.52  | 41   | 2.41  |   |
| 7010 | Rabl6          | -1.05 | 403  | 40.07 | 514  | 38.27 |   |
| 7011 | Psma2          | -1.05 | 224  | 94.04 | 297  | 89.82 |   |
| 7012 | Zfp148         | -1.05 | 257  | 22.4  | 337  | 21.39 |   |
| 7013 | Csnk1e         | -1.05 | 204  | 20.06 | 265  | 19.15 |   |
| 7014 | Tanc1          | -1.05 | 689  | 23.49 | 926  | 22.43 |   |
| 7015 | Chd4           | -1.05 | 1319 | 70.34 | 1709 | 67.14 |   |
| 7016 | Psen1          | -1.05 | 205  | 30.95 | 277  | 29.54 |   |
| 7017 | Dguok          | -1.05 | 113  | 14.04 | 148  | 13.4  |   |
| 7018 | Ppp1r10        | -1.05 | 247  | 20.47 | 325  | 19.54 |   |
| 7019 | Tacc3          | -1.05 | 56   | 9.09  | 66   | 8.67  |   |
| 7020 | Dctn5          | -1.05 | 60   | 10.32 | 82   | 9.85  |   |
| 7021 | Kihl42         | -1.05 | 52   | 5.27  | 69   | 5.03  |   |
| 7022 | Tbc1d1         | -1.05 | 142  | 5.85  | 166  | 5.58  |   |
| 7023 | Ctage5         | -1.05 | 140  | 15.51 | 199  | 14.8  |   |
| 7024 | Scamp1         | -1.05 | 207  | 13.44 | 260  | 12.82 |   |
| 7025 | LOC100362142   | -1.05 | 239  | 60    | 289  | 57.23 |   |
| 7026 | Rbm38          | -1.05 | 37   | 6.22  | 51   | 5.93  |   |
| 7027 | Tatdn2         | -1.05 | 96   | 10.96 | 124  | 10.45 |   |
| 7028 | Thap7          | -1.05 | 38   | 5.27  | 48   | 5.03  |   |
| 7029 | Efr3a          | -1.05 | 266  | 17.8  | 352  | 16.98 |   |
| 7030 | Med24          | -1.05 | 205  | 18.34 | 268  | 17.49 |   |
| 7031 | Psma6          | -1.05 | 128  | 39.44 | 172  | 37.62 |   |
| 7032 | Dnmt1          | -1.05 | 358  | 20.19 | 454  | 19.26 |   |
| 7033 | Wdfy2          | -1.05 | 220  | 9.2   | 302  | 8.78  |   |
| 7034 | Frmf8          | -1.05 | 141  | 15.95 | 208  | 15.21 |   |
| 7035 | Ptprk          | -1.05 | 775  | 37.39 | 1067 | 35.66 |   |
| 7036 | Rnf145         | -1.05 | 346  | 36.35 | 460  | 34.66 |   |
| 7037 | Nfe2l2         | -1.05 | 426  | 57.6  | 551  | 54.91 |   |
| 7038 | LOC306766      | -1.05 | 188  | 24.61 | 241  | 23.46 |   |
| 7039 | Mtpap          | -1.05 | 56   | 5.4   | 78   | 5.15  |   |
| 7040 | Slc25a38       | -1.05 | 52   | 7.49  | 85   | 7.14  |   |
| 7041 | Tmem173        | -1.05 | 42   | 7.1   | 55   | 6.77  |   |
| 7042 | Acaca          | -1.05 | 238  | 10.66 | 294  | 10.16 |   |
| 7043 | Ap1b1          | -1.05 | 180  | 15.64 | 237  | 14.91 |   |
| 7044 | Mau2           | -1.05 | 442  | 15.5  | 560  | 14.77 |   |
| 7045 | Tbp            | -1.05 | 72   | 9.89  | 92   | 9.42  |   |
| 7046 | Dcaf12         | -1.05 | 73   | 13.65 | 99   | 13    |   |
| 7047 | Hnrnpm         | -1.05 | 433  | 47.61 | 559  | 45.36 |   |
| 7048 | Arid2          | -1.05 | 453  | 19.1  | 593  | 18.2  |   |
| 7049 | Prps1          | -1.05 | 64   | 11.33 | 79   | 10.79 |   |
| 7050 | Tm9sf2         | -1.05 | 413  | 44.91 | 518  | 42.78 |   |
| 7051 | Atl2           | -1.05 | 189  | 13.07 | 260  | 12.45 |   |
| 7052 | Cabin1         | -1.05 | 202  | 7.28  | 252  | 6.93  |   |
| 7053 | Coq2           | -1.05 | 97   | 14.88 | 120  | 14.17 |   |
| 7054 | Gatc           | -1.05 | 98   | 13.53 | 101  | 12.89 |   |
| 7055 | Timm22         | -1.05 | 76   | 14.68 | 99   | 13.98 |   |
| 7056 | Tnpo2          | -1.05 | 538  | 38.26 | 698  | 36.43 |   |
| 7057 | LOC100912282   | -1.05 | 1    | 20.44 | 0    | 19.46 |   |
| 7058 | Man2a1         | -1.05 | 1752 | 80.15 | 2250 | 76.29 |   |
| 7059 | Ipo5           | -1.05 | 518  | 58.97 | 685  | 56.12 |   |
| 7060 | AABR07066142.1 | -1.05 | 0    | 7.63  | 0    | 7.26  |   |
| 7061 | Abhd10_2       | -1.05 | 0    | 2.78  | 1    | 2.65  |   |

Supplemental Table 3  
 FSH + Ad-E versus FSH + Ad-FOXO1(A3), 24 hours

|      | A              | B     | C    | D      | E    | F      | G |
|------|----------------|-------|------|--------|------|--------|---|
| 7062 | Ccdc104        | -1.05 | 54   | 8.32   | 66   | 7.92   |   |
| 7063 | LOC364561      | -1.05 | 84   | 25.83  | 105  | 24.58  |   |
| 7064 | Naf1           | -1.05 | 31   | 1.45   | 43   | 1.38   |   |
| 7065 | Slc10a3        | -1.05 | 57   | 10.74  | 70   | 10.21  |   |
| 7066 | Tpk1           | -1.05 | 67   | 2.39   | 89   | 2.28   |   |
| 7067 | AABR07001923.1 | -1.05 | 11   | 2.12   | 14   | 2.02   |   |
| 7068 | Ermard         | -1.05 | 100  | 7.82   | 120  | 7.44   |   |
| 7069 | Fbxo10         | -1.05 | 82   | 4.87   | 110  | 4.64   |   |
| 7070 | LOC100911822   | -1.05 | 4    | 4.48   | 1    | 4.26   |   |
| 7071 | Mettl17        | -1.05 | 43   | 6.83   | 64   | 6.5    |   |
| 7072 | Ocrl           | -1.05 | 101  | 5.34   | 132  | 5.09   |   |
| 7073 | Snip1          | -1.05 | 0    | 4.85   | 0    | 4.61   |   |
| 7074 | Zfp286a        | -1.05 | 14   | 1.29   | 20   | 1.23   |   |
| 7075 | Zswim3         | -1.05 | 37   | 2.96   | 55   | 2.82   |   |
| 7076 | Tiparp         | -1.05 | 190  | 25.99  | 263  | 24.72  |   |
| 7077 | Tbc1d14        | -1.05 | 326  | 17.87  | 405  | 16.99  |   |
| 7078 | Rbm4b_1        | -1.05 | 106  | 25.16  | 134  | 23.92  |   |
| 7079 | Rpl3           | -1.05 | 1094 | 286.13 | 1412 | 272.07 |   |
| 7080 | Fmnl2          | -1.05 | 149  | 10.04  | 195  | 9.54   |   |
| 7081 | Msantd4        | -1.05 | 93   | 11.37  | 118  | 10.81  |   |
| 7082 | Dnaja4         | -1.05 | 89   | 11.69  | 109  | 11.11  |   |
| 7083 | Plcb3          | -1.05 | 160  | 14.8   | 210  | 14.06  |   |
| 7084 | Socs4          | -1.05 | 56   | 8.67   | 67   | 8.24   |   |
| 7085 | Larp4b         | -1.05 | 157  | 19.44  | 220  | 18.47  |   |
| 7086 | Mob4           | -1.05 | 98   | 12.34  | 136  | 11.72  |   |
| 7087 | Gna13          | -1.05 | 405  | 23.21  | 510  | 22.04  |   |
| 7088 | Loh12cr1       | -1.05 | 54   | 7.37   | 73   | 7      |   |
| 7089 | Mrpl36_1       | -1.05 | 31   | 15.65  | 43   | 14.86  |   |
| 7090 | Rbm43          | -1.05 | 46   | 7.07   | 62   | 6.71   |   |
| 7091 | Rpl6           | -1.05 | 74   | 240.57 | 63   | 228.44 |   |
| 7092 | Nisch          | -1.05 | 1644 | 103.18 | 2305 | 97.97  |   |
| 7093 | Scfd1          | -1.05 | 162  | 16.87  | 215  | 16.02  |   |
| 7094 | Atp6v1a        | -1.05 | 214  | 20.11  | 258  | 19.09  |   |
| 7095 | Dpy19l4        | -1.05 | 91   | 9.22   | 151  | 8.75   |   |
| 7096 | Mul1           | -1.05 | 90   | 7.58   | 118  | 7.2    |   |
| 7097 | Wtap           | -1.05 | 228  | 19.13  | 315  | 18.15  |   |
| 7098 | Cd2bp2         | -1.05 | 195  | 23.94  | 249  | 22.72  |   |
| 7099 | Cars2          | -1.05 | 77   | 5.22   | 110  | 4.95   |   |
| 7100 | Cirbp          | -1.05 | 149  | 26.76  | 201  | 25.4   |   |
| 7101 | Gemin8         | -1.05 | 34   | 8.12   | 41   | 7.71   |   |
| 7102 | LOC102551819   | -1.05 | 26   | 3.99   | 33   | 3.79   |   |
| 7103 | Mcmbp          | -1.05 | 153  | 19.07  | 209  | 18.1   |   |
| 7104 | Mrpl40         | -1.05 | 28   | 3.92   | 33   | 3.72   |   |
| 7105 | Slbp           | -1.05 | 135  | 28.42  | 175  | 26.97  |   |
| 7106 | Abhd14b        | -1.05 | 91   | 17.34  | 116  | 16.45  |   |
| 7107 | H3f3b_2        | -1.05 | 363  | 425.5  | 442  | 403.73 |   |
| 7108 | Lgr4           | -1.05 | 212  | 17.69  | 281  | 16.79  |   |
| 7109 | Ltbr           | -1.05 | 331  | 55.14  | 429  | 52.31  |   |
| 7110 | Ptdss1         | -1.05 | 165  | 18.76  | 225  | 17.79  |   |
| 7111 | Fip1l1         | -1.05 | 219  | 22.44  | 302  | 21.28  |   |
| 7112 | Tacc2          | -1.05 | 179  | 3.99   | 242  | 3.79   |   |
| 7113 | Calm3          | -1.05 | 263  | 48.51  | 298  | 46.01  |   |
| 7114 | Rell1          | -1.05 | 204  | 18.69  | 300  | 17.73  |   |
| 7115 | 0610010F05Rik  | -1.05 | 93   | 5.84   | 164  | 5.54   |   |

Supplemental Table 3  
 FSH + Ad-E versus FSH + Ad-FOXO1(A3), 24 hours

|      | A          | B     | C    | D      | E    | F      | G |
|------|------------|-------|------|--------|------|--------|---|
| 7116 | Dap3       | -1.05 | 127  | 13.61  | 194  | 12.9   |   |
| 7117 | Glb1l      | -1.05 | 52   | 6.44   | 66   | 6.1    |   |
| 7118 | Slc33a1    | -1.05 | 108  | 9.55   | 157  | 9.06   |   |
| 7119 | Cep68      | -1.05 | 131  | 14.91  | 171  | 14.13  |   |
| 7120 | Nt5c2      | -1.05 | 135  | 19.98  | 199  | 18.94  |   |
| 7121 | Tcf25      | -1.05 | 668  | 59.63  | 860  | 56.53  |   |
| 7122 | Abce1      | -1.05 | 281  | 27.81  | 358  | 26.36  |   |
| 7123 | Stard7     | -1.05 | 211  | 19.58  | 274  | 18.56  |   |
| 7124 | Arpc3      | -1.05 | 179  | 67.44  | 236  | 63.92  |   |
| 7125 | Map2k5     | -1.05 | 128  | 8.85   | 220  | 8.39   |   |
| 7126 | Zfp275     | -1.05 | 169  | 9.8    | 231  | 9.29   |   |
| 7127 | Top1       | -1.06 | 396  | 52.81  | 401  | 50.05  |   |
| 7128 | Ptprn      | -1.06 | 91   | 8.62   | 112  | 8.16   |   |
| 7129 | Nfkb2      | -1.06 | 86   | 10.14  | 110  | 9.61   |   |
| 7130 | Sumo2      | -1.06 | 111  | 128.31 | 138  | 121.57 |   |
| 7131 | AC091229.1 | -1.06 | 23   | 1.92   | 32   | 1.82   |   |
| 7132 | Apool      | -1.06 | 58   | 11.56  | 84   | 10.94  |   |
| 7133 | Gpank1     | -1.06 | 33   | 7      | 42   | 6.63   |   |
| 7134 | Irf2bp2    | -1.06 | 82   | 15.82  | 101  | 14.99  |   |
| 7135 | Odf2l      | -1.06 | 26   | 1.43   | 47   | 1.35   |   |
| 7136 | Rapgef3    | -1.06 | 19   | 1.6    | 30   | 1.52   |   |
| 7137 | Srsf2      | -1.06 | 416  | 60.76  | 599  | 57.53  |   |
| 7138 | Mcm7       | -1.06 | 179  | 24.63  | 225  | 23.32  |   |
| 7139 | Stat2      | -1.06 | 166  | 13.86  | 206  | 13.12  |   |
| 7140 | Pan2       | -1.06 | 130  | 8.74   | 159  | 8.27   |   |
| 7141 | Zc3hav1    | -1.06 | 367  | 23.87  | 487  | 22.59  |   |
| 7142 | Slc23a2    | -1.06 | 1335 | 61.7   | 1749 | 58.38  |   |
| 7143 | Ncapd3     | -1.06 | 158  | 7.79   | 184  | 7.37   |   |
| 7144 | Ufd1l      | -1.06 | 164  | 22.32  | 210  | 21.12  |   |
| 7145 | Sdc3       | -1.06 | 401  | 29.62  | 515  | 28.01  |   |
| 7146 | Acat1      | -1.06 | 103  | 13.75  | 151  | 13     |   |
| 7147 | Bzw1       | -1.06 | 371  | 81.5   | 490  | 77.08  |   |
| 7148 | Elp6       | -1.06 | 56   | 9.35   | 62   | 8.84   |   |
| 7149 | LOC288913  | -1.06 | 69   | 37.3   | 88   | 35.27  |   |
| 7150 | Parp1      | -1.06 | 378  | 33.45  | 482  | 31.62  |   |
| 7151 | Hdac4      | -1.06 | 604  | 31.16  | 826  | 29.46  |   |
| 7152 | C2cd2l     | -1.06 | 64   | 4.72   | 77   | 4.46   |   |
| 7153 | Lamtor5    | -1.06 | 56   | 21.83  | 85   | 20.63  |   |
| 7154 | Nlgn2      | -1.06 | 70   | 4.83   | 89   | 4.56   |   |
| 7155 | Nap114     | -1.06 | 318  | 44.75  | 420  | 42.29  |   |
| 7156 | Dsel       | -1.06 | 71   | 6.48   | 88   | 6.12   |   |
| 7157 | Erbp2      | -1.06 | 45   | 5.5    | 55   | 5.19   |   |
| 7158 | Sirt5      | -1.06 | 138  | 16.25  | 188  | 15.36  |   |
| 7159 | Kpna3      | -1.06 | 129  | 19.19  | 184  | 18.13  |   |
| 7160 | Ndufs4     | -1.06 | 235  | 35.77  | 301  | 33.79  |   |
| 7161 | Ndufs4     | -1.06 | 404  | 30.97  | 539  | 29.25  |   |
| 7162 | Arhgap32   | -1.06 | 310  | 10.24  | 406  | 9.67   |   |
| 7163 | Bri3bp     | -1.06 | 24   | 6.12   | 32   | 5.78   |   |
| 7164 | Oxnad1     | -1.06 | 79   | 4.97   | 94   | 4.7    |   |
| 7165 | Ftsj1      | -1.06 | 47   | 8.32   | 61   | 7.86   |   |
| 7166 | Mrps21     | -1.06 | 86   | 21.07  | 106  | 19.9   |   |
| 7167 | Nme3       | -1.06 | 21   | 10.67  | 24   | 10.07  |   |
| 7168 | Pus3       | -1.06 | 20   | 4.08   | 26   | 3.85   |   |
| 7169 | Rps27l     | -1.06 | 77   | 39.09  | 100  | 36.91  |   |

Supplemental Table 3  
 FSH + Ad-E versus FSH + Ad-FOXO1(A3), 24 hours

|      | A          | B     | C   | D      | E   | F      | G |
|------|------------|-------|-----|--------|-----|--------|---|
| 7170 | Slc18b1    | -1.06 | 30  | 2.74   | 41  | 2.59   |   |
| 7171 | Sned1      | -1.06 | 59  | 2.46   | 71  | 2.32   |   |
| 7172 | St3gal2    | -1.06 | 576 | 68.34  | 721 | 64.54  |   |
| 7173 | Tspyl4     | -1.06 | 19  | 3.46   | 24  | 3.27   |   |
| 7174 | Arf1       | -1.06 | 447 | 171.95 | 570 | 162.35 |   |
| 7175 | Ptbp1      | -1.06 | 320 | 109.93 | 351 | 103.79 |   |
| 7176 | Trak1      | -1.06 | 202 | 10.36  | 277 | 9.78   |   |
| 7177 | Suclg2     | -1.06 | 400 | 52.21  | 492 | 49.28  |   |
| 7178 | Thoc3      | -1.06 | 68  | 10.44  | 81  | 9.85   |   |
| 7179 | Eif3c      | -1.06 | 746 | 87.3   | 940 | 82.38  |   |
| 7180 | Ttc9c      | -1.06 | 124 | 18.6   | 167 | 17.55  |   |
| 7181 | Bub1       | -1.06 | 46  | 3.38   | 58  | 3.19   |   |
| 7182 | Toe1       | -1.06 | 50  | 7.67   | 65  | 7.23   |   |
| 7183 | Entpd4     | -1.06 | 135 | 12.32  | 177 | 11.62  |   |
| 7184 | Rpl37a     | -1.06 | 156 | 43.65  | 188 | 41.17  |   |
| 7185 | Narf       | -1.06 | 86  | 10.51  | 123 | 9.91   |   |
| 7186 | Plin2      | -1.06 | 138 | 17.13  | 160 | 16.15  |   |
| 7187 | Aasdhppt   | -1.06 | 51  | 15.52  | 67  | 14.63  |   |
| 7188 | Ccdc59     | -1.06 | 28  | 4.49   | 45  | 4.23   |   |
| 7189 | S1pr2      | -1.06 | 74  | 9.11   | 91  | 8.59   |   |
| 7190 | Stoml1     | -1.06 | 28  | 3.83   | 29  | 3.61   |   |
| 7191 | Trmt10c    | -1.06 | 47  | 6.35   | 59  | 5.99   |   |
| 7192 | Selenbp1_1 | -1.06 | 0   | 48.44  | 0   | 45.66  |   |
| 7193 | Fam134b_1  | -1.06 | 71  | 10.01  | 78  | 9.43   |   |
| 7194 | Mybbp1a    | -1.06 | 375 | 33.5   | 467 | 31.56  |   |
| 7195 | Baz2a      | -1.06 | 247 | 15.97  | 297 | 15.05  |   |
| 7196 | Zfp955a    | -1.06 | 50  | 4.42   | 63  | 4.16   |   |
| 7197 | Gon4l      | -1.06 | 209 | 6.01   | 262 | 5.66   |   |
| 7198 | Depdc5     | -1.06 | 182 | 5.54   | 240 | 5.22   |   |
| 7199 | Med20      | -1.06 | 89  | 14.24  | 116 | 13.41  |   |
| 7200 | Nsd1       | -1.06 | 681 | 21.14  | 834 | 19.91  |   |
| 7201 | Tead4      | -1.06 | 94  | 5.31   | 117 | 5      |   |
| 7202 | Sec14l1    | -1.06 | 572 | 41.66  | 739 | 39.23  |   |
| 7203 | Asun       | -1.06 | 113 | 10.63  | 161 | 10     |   |
| 7204 | Chchd1     | -1.06 | 31  | 17.68  | 38  | 16.64  |   |
| 7205 | Cr1s1      | -1.06 | 75  | 10.46  | 105 | 9.84   |   |
| 7206 | Hook2      | -1.06 | 36  | 3.77   | 48  | 3.55   |   |
| 7207 | Pim1       | -1.06 | 29  | 7.53   | 36  | 7.09   |   |
| 7208 | Pou2f1     | -1.06 | 59  | 3.54   | 83  | 3.33   |   |
| 7209 | Sfmbt1     | -1.06 | 145 | 8.51   | 209 | 8.01   |   |
| 7210 | Tusc3      | -1.06 | 147 | 17.96  | 172 | 16.91  |   |
| 7211 | Utp18      | -1.06 | 41  | 5.96   | 51  | 5.61   |   |
| 7212 | Zfp180     | -1.06 | 120 | 9.96   | 152 | 9.38   |   |
| 7213 | Parp14     | -1.06 | 236 | 11.08  | 289 | 10.43  |   |
| 7214 | Phf13      | -1.06 | 140 | 15.83  | 176 | 14.9   |   |
| 7215 | Dclre1b    | -1.06 | 72  | 5.27   | 93  | 4.96   |   |
| 7216 | Kdm2b      | -1.06 | 170 | 9.74   | 200 | 9.16   |   |
| 7217 | Tmtc3      | -1.06 | 133 | 6.91   | 170 | 6.5    |   |
| 7218 | Pip4k2c    | -1.06 | 149 | 16.71  | 197 | 15.72  |   |
| 7219 | Gtf2h1     | -1.06 | 129 | 11.79  | 173 | 11.09  |   |
| 7220 | Fpgs       | -1.06 | 35  | 5.64   | 45  | 5.31   |   |
| 7221 | Tomm40l    | -1.06 | 32  | 8.92   | 41  | 8.39   |   |
| 7222 | Wdr33      | -1.06 | 397 | 20.16  | 524 | 18.96  |   |
| 7223 | Prdx1      | -1.06 | 169 | 180.02 | 204 | 169.3  |   |

Supplemental Table 3  
 FSH + Ad-E versus FSH + Ad-FOXO1(A3), 24 hours

|      | A              | B     | C    | D       | E    | F      | G |
|------|----------------|-------|------|---------|------|--------|---|
| 7224 | Coq6           | -1.06 | 77   | 13.36   | 103  | 12.57  |   |
| 7225 | Mapk8ip3       | -1.06 | 240  | 12.04   | 325  | 11.32  |   |
| 7226 | Dnajb11        | -1.06 | 168  | 31.38   | 213  | 29.5   |   |
| 7227 | Pde7b          | -1.06 | 1064 | 40.79   | 1486 | 38.35  |   |
| 7228 | Aldh3a2        | -1.06 | 153  | 14.92   | 190  | 14.02  |   |
| 7229 | Ergic2         | -1.06 | 135  | 22.06   | 179  | 20.74  |   |
| 7230 | Lztr1          | -1.06 | 165  | 18.07   | 205  | 16.98  |   |
| 7231 | Scg2           | -1.06 | 37   | 5.26    | 44   | 4.94   |   |
| 7232 | Tchp           | -1.06 | 44   | 4.55    | 54   | 4.28   |   |
| 7233 | Ube2r2         | -1.06 | 351  | 75.32   | 457  | 70.79  |   |
| 7234 | Itgb5          | -1.06 | 769  | 112.28  | 1001 | 105.52 |   |
| 7235 | Mttr9          | -1.06 | 187  | 10.95   | 251  | 10.29  |   |
| 7236 | Cnih1          | -1.06 | 160  | 39.2    | 208  | 36.82  |   |
| 7237 | Med10          | -1.06 | 57   | 14.94   | 71   | 14.04  |   |
| 7238 | Ptpn11         | -1.06 | 811  | 48.97   | 1042 | 46     |   |
| 7239 | AY172581.24    | -1.06 | 7703 | 1818.41 | 9776 | 1707.9 |   |
| 7240 | Mbd3           | -1.06 | 142  | 23.07   | 150  | 21.67  |   |
| 7241 | Ep300          | -1.06 | 122  | 11.49   | 145  | 10.79  |   |
| 7242 | Hsd17b7        | -1.06 | 26   | 7.54    | 18   | 7.08   |   |
| 7243 | Hsp90b1        | -1.07 | 2088 | 235.15  | 2605 | 220.79 |   |
| 7244 | Fam96b         | -1.07 | 44   | 22.47   | 58   | 21.09  |   |
| 7245 | Fanci          | -1.07 | 92   | 3.89    | 113  | 3.65   |   |
| 7246 | Farp2          | -1.07 | 147  | 3.61    | 236  | 3.39   |   |
| 7247 | Mcart1_1       | -1.07 | 15   | 7.92    | 20   | 7.43   |   |
| 7248 | Sc5d           | -1.07 | 238  | 17.45   | 302  | 16.37  |   |
| 7249 | Prkcd          | -1.07 | 331  | 37.32   | 423  | 35.02  |   |
| 7250 | Tgoln2         | -1.07 | 464  | 36.11   | 591  | 33.89  |   |
| 7251 | Ndufs1         | -1.07 | 201  | 22.39   | 246  | 21.01  |   |
| 7252 | Rnf115         | -1.07 | 138  | 17.63   | 176  | 16.54  |   |
| 7253 | Zfp462         | -1.07 | 244  | 8.89    | 314  | 8.34   |   |
| 7254 | Zranb2         | -1.07 | 321  | 32.32   | 453  | 30.31  |   |
| 7255 | Ero1l          | -1.07 | 80   | 9.16    | 105  | 8.59   |   |
| 7256 | Grn            | -1.07 | 671  | 103.74  | 858  | 97.26  |   |
| 7257 | Gltscr1l       | -1.07 | 181  | 5.1     | 226  | 4.78   |   |
| 7258 | Crel1          | -1.07 | 181  | 25.82   | 217  | 24.2   |   |
| 7259 | RGD1565297     | -1.07 | 156  | 51.63   | 212  | 48.37  |   |
| 7260 | Slc35c2        | -1.07 | 31   | 13.07   | 38   | 12.25  |   |
| 7261 | Manba          | -1.07 | 89   | 7.77    | 118  | 7.28   |   |
| 7262 | Hn1l           | -1.07 | 176  | 21.17   | 213  | 19.83  |   |
| 7263 | Shisa5         | -1.07 | 180  | 30.07   | 229  | 28.17  |   |
| 7264 | Cnot7          | -1.07 | 208  | 24.1    | 276  | 22.57  |   |
| 7265 | Nhlrc2         | -1.07 | 214  | 7.85    | 292  | 7.35   |   |
| 7266 | Phb2           | -1.07 | 224  | 57.74   | 274  | 54.06  |   |
| 7267 | Tada2b         | -1.07 | 126  | 12.07   | 176  | 11.3   |   |
| 7268 | Mttr4          | -1.07 | 264  | 15.77   | 343  | 14.76  |   |
| 7269 | Sigmar1        | -1.07 | 139  | 30.1    | 177  | 28.17  |   |
| 7270 | Slc30a5        | -1.07 | 182  | 16.17   | 232  | 15.13  |   |
| 7271 | Sipa1l1        | -1.07 | 177  | 8.51    | 219  | 7.97   |   |
| 7272 | Sars           | -1.07 | 196  | 34.61   | 251  | 32.38  |   |
| 7273 | LOC100911959   | -1.07 | 570  | 58.52   | 714  | 54.73  |   |
| 7274 | Nxf1           | -1.07 | 438  | 47.45   | 521  | 44.37  |   |
| 7275 | Tsc22d1        | -1.07 | 3084 | 215.55  | 3942 | 201.5  |   |
| 7276 | AABR07010468.1 | -1.07 | 22   | 2.07    | 14   | 1.94   |   |
| 7277 | C030039L03Rik  | -1.07 | 14   | 2.27    | 25   | 2.13   |   |

Supplemental Table 3  
 FSH + Ad-E versus FSH + Ad-FOXO1(A3), 24 hours

|      | A              | B     | C   | D     | E   | F     | G |
|------|----------------|-------|-----|-------|-----|-------|---|
| 7278 | Ctsz           | -1.07 | 123 | 32.07 | 156 | 29.97 |   |
| 7279 | Cttnbp2        | -1.07 | 42  | 1.46  | 61  | 1.37  |   |
| 7280 | Ednra          | -1.07 | 134 | 7.42  | 178 | 6.93  |   |
| 7281 | Eme1           | -1.07 | 6   | 0.52  | 7   | 0.48  |   |
| 7282 | Gskip          | -1.07 | 70  | 6.74  | 90  | 6.3   |   |
| 7283 | Islr           | -1.07 | 4   | 0.73  | 5   | 0.68  |   |
| 7284 | Klhdc4_2       | -1.07 | 4   | 4.51  | 5   | 4.22  |   |
| 7285 | Lmo4           | -1.07 | 184 | 22.1  | 250 | 20.65 |   |
| 7286 | Lum            | -1.07 | 8   | 1.44  | 11  | 1.34  |   |
| 7287 | Nova1          | -1.07 | 108 | 7.25  | 160 | 6.78  |   |
| 7288 | Paqr4          | -1.07 | 2   | 0.35  | 3   | 0.33  |   |
| 7289 | Pole3          | -1.07 | 91  | 14.51 | 112 | 13.56 |   |
| 7290 | Pwp2           | -1.07 | 92  | 8.16  | 121 | 7.63  |   |
| 7291 | RGD1560436     | -1.07 | 8   | 1.34  | 9   | 1.25  |   |
| 7292 | Rn60_13_0828.1 | -1.07 | 5   | 0.37  | 5   | 0.34  |   |
| 7293 | Rps27a-ps1     | -1.07 | 0   | 5.31  | 0   | 4.97  |   |
| 7294 | Rsph9          | -1.07 | 10  | 1.29  | 15  | 1.2   |   |
| 7295 | Sae1           | -1.07 | 366 | 35.89 | 475 | 33.54 |   |
| 7296 | Sap30l         | -1.07 | 36  | 15.83 | 46  | 14.79 |   |
| 7297 | Sel1l3         | -1.07 | 7   | 0.35  | 7   | 0.33  |   |
| 7298 | Ufsp1          | -1.07 | 4   | 2.21  | 5   | 2.07  |   |
| 7299 | Zbtb7b         | -1.07 | 80  | 11.39 | 104 | 10.64 |   |
| 7300 | Zdhhc23        | -1.07 | 7   | 0.7   | 12  | 0.66  |   |
| 7301 | AABR07027854.1 | -1.07 | 3   | 1.31  | 3   | 1.22  |   |
| 7302 | AABR07051326.1 | -1.07 | 2   | 0.53  | 1   | 0.5   |   |
| 7303 | AABR07054968.1 | -1.07 | 0   | 0.99  | 0   | 0.93  |   |
| 7304 | AC130866.2     | -1.07 | 0   | 0.56  | 0   | 0.53  |   |
| 7305 | Aebp1          | -1.07 | 5   | 0.38  | 5   | 0.35  |   |
| 7306 | Akr1e2         | -1.07 | 250 | 48.06 | 337 | 44.92 |   |
| 7307 | Alg8           | -1.07 | 40  | 4.35  | 74  | 4.07  |   |
| 7308 | Anapc15        | -1.07 | 10  | 7.26  | 10  | 6.78  |   |
| 7309 | Asic1          | -1.07 | 3   | 0.34  | 7   | 0.32  |   |
| 7310 | Atp6ap1l       | -1.07 | 5   | 1.28  | 12  | 1.2   |   |
| 7311 | Cacna1c        | -1.07 | 8   | 0.18  | 20  | 0.17  |   |
| 7312 | Ckb            | -1.07 | 37  | 8.41  | 45  | 7.86  |   |
| 7313 | Dbndd1         | -1.07 | 8   | 0.86  | 10  | 0.8   |   |
| 7314 | Dync2li1       | -1.07 | 23  | 4.26  | 41  | 3.98  |   |
| 7315 | Eef2kmt        | -1.07 | 10  | 3.46  | 20  | 3.24  |   |
| 7316 | Egflam         | -1.07 | 11  | 0.33  | 9   | 0.31  |   |
| 7317 | Eif3h_2        | -1.07 | 0   | 1.88  | 0   | 1.76  |   |
| 7318 | Eml6           | -1.07 | 30  | 0.43  | 35  | 0.4   |   |
| 7319 | Fmn1           | -1.07 | 22  | 0.26  | 14  | 0.24  |   |
| 7320 | Haghl          | -1.07 | 5   | 1.15  | 6   | 1.07  |   |
| 7321 | Haus5          | -1.07 | 34  | 1.71  | 38  | 1.6   |   |
| 7322 | LOC100361993   | -1.07 | 15  | 9.57  | 22  | 8.94  |   |
| 7323 | LOC100910255_2 | -1.07 | 2   | 0.24  | 1   | 0.22  |   |
| 7324 | LOC102553012   | -1.07 | 4   | 0.6   | 5   | 0.56  |   |
| 7325 | Lppr4          | -1.07 | 5   | 0.26  | 7   | 0.24  |   |
| 7326 | Map10          | -1.07 | 4   | 0.52  | 5   | 0.48  |   |
| 7327 | Mmgt1          | -1.07 | 80  | 7.03  | 103 | 6.57  |   |
| 7328 | Mrpl30         | -1.07 | 3   | 0.49  | 5   | 0.46  |   |
| 7329 | Mtus2          | -1.07 | 28  | 0.62  | 37  | 0.58  |   |
| 7330 | Myh7b          | -1.07 | 8   | 0.24  | 10  | 0.22  |   |
| 7331 | Ndrp3          | -1.07 | 63  | 18.09 | 81  | 16.9  |   |



Supplemental Table 3  
 FSH + Ad-E versus FSH + Ad-FOXO1(A3), 24 hours

|      | A              | B     | C   | D      | E    | F      | G |
|------|----------------|-------|-----|--------|------|--------|---|
| 7332 | Pag1           | -1.07 | 14  | 3.54   | 17   | 3.31   |   |
| 7333 | Pcdhga1        | -1.07 | 8   | 1.2    | 10   | 1.12   |   |
| 7334 | Pex1           | -1.07 | 106 | 6.72   | 154  | 6.28   |   |
| 7335 | Pmpca          | -1.07 | 135 | 20.66  | 155  | 19.31  |   |
| 7336 | Ppcdc          | -1.07 | 6   | 1.07   | 6    | 1      |   |
| 7337 | Pyurf11        | -1.07 | 36  | 5.27   | 46   | 4.92   |   |
| 7338 | Rfesd          | -1.07 | 20  | 9.39   | 29   | 8.78   |   |
| 7339 | RGD1311164     | -1.07 | 45  | 4.54   | 45   | 4.24   |   |
| 7340 | Rn60_20_0046.4 | -1.07 | 12  | 5.37   | 15   | 5.02   |   |
| 7341 | rnf141         | -1.07 | 61  | 11.88  | 75   | 11.11  |   |
| 7342 | Rnf43          | -1.07 | 22  | 1.23   | 25   | 1.15   |   |
| 7343 | Scnm1          | -1.07 | 14  | 4.19   | 19   | 3.91   |   |
| 7344 | Scube3         | -1.07 | 28  | 0.49   | 41   | 0.45   |   |
| 7345 | Sfi1           | -1.07 | 100 | 3.96   | 135  | 3.7    |   |
| 7346 | Slc7a8         | -1.07 | 15  | 1.04   | 26   | 0.98   |   |
| 7347 | SNORA7_2       | -1.07 | 0   | 20.69  | 0    | 19.34  |   |
| 7348 | Syde2          | -1.07 | 68  | 5.35   | 100  | 5      |   |
| 7349 | Tbcd           | -1.07 | 243 | 15.35  | 309  | 14.34  |   |
| 7350 | Tbx10          | -1.07 | 8   | 1.4    | 6    | 1.31   |   |
| 7351 | Tex26          | -1.07 | 10  | 0.84   | 10   | 0.78   |   |
| 7352 | Ticrr          | -1.07 | 30  | 1.11   | 31   | 1.04   |   |
| 7353 | Tigd5          | -1.07 | 12  | 1.72   | 15   | 1.61   |   |
| 7354 | Tmem234        | -1.07 | 14  | 1.79   | 14   | 1.67   |   |
| 7355 | Trpv6          | -1.07 | 30  | 1.49   | 52   | 1.39   |   |
| 7356 | Ttc25          | -1.07 | 11  | 0.59   | 13   | 0.55   |   |
| 7357 | Xpa            | -1.07 | 39  | 1.2    | 61   | 1.12   |   |
| 7358 | Zbtb8b         | -1.07 | 6   | 0.54   | 6    | 0.5    |   |
| 7359 | Zfp473         | -1.07 | 4   | 0.45   | 6    | 0.42   |   |
| 7360 | Zfp69          | -1.07 | 5   | 0.6    | 9    | 0.56   |   |
| 7361 | Ctsb           | -1.07 | 849 | 153.07 | 1044 | 143.01 |   |
| 7362 | Atf6           | -1.07 | 271 | 18.94  | 354  | 17.68  |   |
| 7363 | Zfp260_2       | -1.07 | 124 | 21.07  | 143  | 19.67  |   |
| 7364 | LOC100362038   | -1.07 | 398 | 19.43  | 497  | 18.14  |   |
| 7365 | Scaf1          | -1.07 | 404 | 34.04  | 510  | 31.78  |   |
| 7366 | Adcy6          | -1.07 | 580 | 33.93  | 722  | 31.68  |   |
| 7367 | Tra2b          | -1.07 | 370 | 63.87  | 438  | 59.62  |   |
| 7368 | Sec31a         | -1.07 | 651 | 48.03  | 847  | 44.83  |   |
| 7369 | Tcaf1          | -1.07 | 132 | 12.26  | 170  | 11.44  |   |
| 7370 | Ptch1          | -1.07 | 139 | 5.64   | 177  | 5.26   |   |
| 7371 | Nadk           | -1.07 | 395 | 34.39  | 513  | 32.08  |   |
| 7372 | Atp6ap1        | -1.07 | 432 | 70.34  | 545  | 65.61  |   |
| 7373 | Arid1a         | -1.07 | 778 | 32.87  | 996  | 30.65  |   |
| 7374 | Cnot10         | -1.07 | 133 | 15.83  | 176  | 14.76  |   |
| 7375 | Gbf1           | -1.07 | 498 | 22.27  | 648  | 20.76  |   |
| 7376 | Gphn           | -1.07 | 145 | 9.6    | 202  | 8.95   |   |
| 7377 | Pik3c3         | -1.07 | 102 | 8.99   | 122  | 8.38   |   |
| 7378 | Snrnp200       | -1.07 | 957 | 50.72  | 1211 | 47.27  |   |
| 7379 | Gsta4          | -1.07 | 216 | 74.21  | 273  | 69.15  |   |
| 7380 | Mrps27         | -1.07 | 108 | 10.45  | 144  | 9.74   |   |
| 7381 | Polr3b         | -1.07 | 83  | 5.7    | 114  | 5.31   |   |
| 7382 | Zcchc17        | -1.07 | 115 | 13.39  | 128  | 12.47  |   |
| 7383 | Elf2           | -1.07 | 169 | 11.4   | 226  | 10.62  |   |
| 7384 | Csf1           | -1.07 | 63  | 5.1    | 75   | 4.75   |   |
| 7385 | Ddx10          | -1.07 | 78  | 6.15   | 99   | 5.73   |   |

Supplemental Table 3  
 FSH + Ad-E versus FSH + Ad-FOXO1(A3), 24 hours

|      | A              | B     | C   | D     | E   | F     | G |
|------|----------------|-------|-----|-------|-----|-------|---|
| 7386 | Med4           | -1.07 | 64  | 14.52 | 79  | 13.51 |   |
| 7387 | Wdfy1          | -1.07 | 197 | 12.73 | 350 | 11.86 |   |
| 7388 | Cdk14          | -1.07 | 127 | 4.19  | 175 | 3.9   |   |
| 7389 | Sfr1           | -1.07 | 156 | 34.97 | 197 | 32.55 |   |
| 7390 | Rreb1          | -1.07 | 231 | 7.73  | 311 | 7.19  |   |
| 7391 | Nrbp1          | -1.07 | 274 | 45.9  | 344 | 42.7  |   |
| 7392 | Pithd1         | -1.07 | 62  | 11.51 | 74  | 10.71 |   |
| 7393 | Vav2           | -1.07 | 74  | 3.16  | 90  | 2.94  |   |
| 7394 | Slc12a7        | -1.07 | 340 | 19.03 | 432 | 17.7  |   |
| 7395 | Syt11          | -1.08 | 139 | 10.8  | 172 | 10.04 |   |
| 7396 | Ap2a1          | -1.08 | 373 | 35.91 | 466 | 33.4  |   |
| 7397 | Pgm3           | -1.08 | 43  | 6     | 59  | 5.58  |   |
| 7398 | Rpl7l1         | -1.08 | 82  | 40.07 | 105 | 37.26 |   |
| 7399 | Wdr4           | -1.08 | 64  | 4.11  | 92  | 3.83  |   |
| 7400 | Ubt2           | -1.08 | 60  | 5.55  | 80  | 5.16  |   |
| 7401 | Txndc15        | -1.08 | 137 | 28.33 | 164 | 26.34 |   |
| 7402 | Atad5          | -1.08 | 56  | 2.21  | 70  | 2.05  |   |
| 7403 | AABR07007000.1 | -1.08 | 39  | 28.81 | 47  | 26.78 |   |
| 7404 | Ankmy2         | -1.08 | 271 | 30.56 | 316 | 28.41 |   |
| 7405 | Zfp157         | -1.08 | 55  | 4.15  | 68  | 3.86  |   |
| 7406 | Lmtk2          | -1.08 | 361 | 14.31 | 469 | 13.3  |   |
| 7407 | Cdc25a         | -1.08 | 136 | 11.33 | 162 | 10.53 |   |
| 7408 | Elof1          | -1.08 | 111 | 34.84 | 139 | 32.38 |   |
| 7409 | LOC100363472   | -1.08 | 40  | 6.8   | 43  | 6.31  |   |
| 7410 | Mpc1           | -1.08 | 36  | 13.44 | 62  | 12.48 |   |
| 7411 | Whamm          | -1.08 | 50  | 4.19  | 69  | 3.9   |   |
| 7412 | Zfhx2          | -1.08 | 39  | 1.34  | 50  | 1.24  |   |
| 7413 | Alg12          | -1.08 | 59  | 5.86  | 78  | 5.44  |   |
| 7414 | Pja1           | -1.08 | 220 | 32.57 | 284 | 30.25 |   |
| 7415 | Tpx2           | -1.08 | 69  | 6.83  | 88  | 6.34  |   |
| 7416 | Gnptab         | -1.08 | 247 | 15.73 | 314 | 14.6  |   |
| 7417 | Ptges3         | -1.08 | 360 | 78.57 | 475 | 72.93 |   |
| 7418 | Srrm1          | -1.08 | 576 | 42.44 | 740 | 39.39 |   |
| 7419 | Trim46         | -1.08 | 39  | 2.87  | 51  | 2.67  |   |
| 7420 | Creb1          | -1.08 | 87  | 18.65 | 103 | 17.31 |   |
| 7421 | Slc9a3r1       | -1.08 | 32  | 7.04  | 38  | 6.53  |   |
| 7422 | Ube2j2         | -1.08 | 153 | 17.5  | 199 | 16.24 |   |
| 7423 | Wapal          | -1.08 | 320 | 23.35 | 377 | 21.67 |   |
| 7424 | Dcaf8          | -1.08 | 470 | 34.25 | 643 | 31.79 |   |
| 7425 | Tmem175        | -1.08 | 148 | 13.3  | 192 | 12.34 |   |
| 7426 | Ago1           | -1.08 | 172 | 19.82 | 220 | 18.38 |   |
| 7427 | Alg14          | -1.08 | 75  | 12    | 97  | 11.12 |   |
| 7428 | Ndufb3         | -1.08 | 26  | 12.73 | 45  | 11.8  |   |
| 7429 | Npepl1         | -1.08 | 176 | 28.86 | 232 | 26.75 |   |
| 7430 | Cryz           | -1.08 | 36  | 4.76  | 43  | 4.41  |   |
| 7431 | Rad9a          | -1.08 | 33  | 7.68  | 39  | 7.12  |   |
| 7432 | Tmem64         | -1.08 | 28  | 7.94  | 38  | 7.36  |   |
| 7433 | Zfp654         | -1.08 | 25  | 5.28  | 31  | 4.9   |   |
| 7434 | Epn2           | -1.08 | 511 | 30.28 | 630 | 28.07 |   |
| 7435 | Eif1ax         | -1.08 | 180 | 18.62 | 228 | 17.26 |   |
| 7436 | Tanc2          | -1.08 | 734 | 16.62 | 838 | 15.4  |   |
| 7437 | RGD1309188     | -1.08 | 71  | 8.89  | 88  | 8.24  |   |
| 7438 | Tlk2           | -1.08 | 201 | 13.95 | 269 | 12.93 |   |
| 7439 | Map1lc3b       | -1.08 | 384 | 36.21 | 474 | 33.54 |   |

Supplemental Table 3  
 FSH + Ad-E versus FSH + Ad-FOXO1(A3), 24 hours

|      | A              | B     | C    | D       | E    | F      | G |
|------|----------------|-------|------|---------|------|--------|---|
| 7440 | Lrrc40         | -1.08 | 82   | 8.18    | 86   | 7.58   |   |
| 7441 | Zfp771         | -1.08 | 90   | 17.46   | 131  | 16.17  |   |
| 7442 | RGD1306502     | -1.08 | 66   | 4.46    | 80   | 4.13   |   |
| 7443 | Ppp1r8         | -1.08 | 178  | 22.31   | 241  | 20.67  |   |
| 7444 | Chkb           | -1.08 | 89   | 18.98   | 87   | 17.57  |   |
| 7445 | B4galt5        | -1.08 | 125  | 10.46   | 171  | 9.69   |   |
| 7446 | LOC619574      | -1.08 | 113  | 16.48   | 137  | 15.26  |   |
| 7447 | AABR07059639.1 | -1.08 | 0    | 1.65    | 0    | 1.53   |   |
| 7448 | Bcl9           | -1.08 | 211  | 10.64   | 258  | 9.85   |   |
| 7449 | G4             | -1.08 | 43   | 7       | 53   | 6.48   |   |
| 7450 | Mrpl2          | -1.08 | 26   | 7.19    | 34   | 6.66   |   |
| 7451 | Tssc4          | -1.08 | 73   | 16.52   | 87   | 15.29  |   |
| 7452 | Pex12          | -1.08 | 21   | 3.24    | 30   | 3      |   |
| 7453 | Rev3l          | -1.08 | 217  | 5.61    | 265  | 5.2    |   |
| 7454 | Rnf25          | -1.08 | 86   | 14.25   | 119  | 13.19  |   |
| 7455 | Vkorc1l1_1     | -1.08 | 0    | 14.32   | 0    | 13.25  |   |
| 7456 | Zfp869         | -1.08 | 50   | 9.55    | 58   | 8.84   |   |
| 7457 | Stat3          | -1.08 | 535  | 38.84   | 672  | 35.95  |   |
| 7458 | Rnpepl1        | -1.08 | 200  | 21.28   | 244  | 19.69  |   |
| 7459 | Ubr4           | -1.08 | 1455 | 31.79   | 1836 | 29.42  |   |
| 7460 | Tmem185a       | -1.08 | 106  | 14.32   | 132  | 13.25  |   |
| 7461 | Smc4           | -1.08 | 90   | 6.83    | 133  | 6.32   |   |
| 7462 | Rn60_8_0646.1  | -1.08 | 62   | 2.99    | 74   | 2.77   |   |
| 7463 | Fbxo6          | -1.08 | 120  | 39.84   | 149  | 36.84  |   |
| 7464 | Ttc17          | -1.08 | 199  | 11.67   | 281  | 10.79  |   |
| 7465 | Eif2s2         | -1.08 | 214  | 46.96   | 259  | 43.42  |   |
| 7466 | Agap3          | -1.08 | 220  | 9.09    | 298  | 8.4    |   |
| 7467 | Mcfcd2         | -1.08 | 136  | 24.13   | 164  | 22.3   |   |
| 7468 | Tmed3          | -1.08 | 147  | 38.51   | 183  | 35.59  |   |
| 7469 | Usp54          | -1.08 | 204  | 7.67    | 257  | 7.09   |   |
| 7470 | Osbpl2         | -1.08 | 114  | 11.86   | 160  | 10.96  |   |
| 7471 | Anxa7          | -1.08 | 351  | 61.94   | 447  | 57.23  |   |
| 7472 | Aldh6a1        | -1.08 | 96   | 14.97   | 131  | 13.83  |   |
| 7473 | E2f3           | -1.08 | 72   | 5.05    | 124  | 4.66   |   |
| 7474 | Gspt2          | -1.08 | 18   | 1.71    | 24   | 1.58   |   |
| 7475 | Pcyox1         | -1.08 | 473  | 77.22   | 586  | 71.31  |   |
| 7476 | Rabgap1l       | -1.08 | 104  | 3.31    | 189  | 3.05   |   |
| 7477 | Rad52          | -1.08 | 34   | 3.04    | 48   | 2.8    |   |
| 7478 | Rwdd2b         | -1.08 | 20   | 2.87    | 24   | 2.65   |   |
| 7479 | Ttc19          | -1.08 | 53   | 5.61    | 63   | 5.18   |   |
| 7480 | Zfp677         | -1.08 | 21   | 3.23    | 28   | 2.98   |   |
| 7481 | Ccni           | -1.08 | 752  | 96.38   | 927  | 88.98  |   |
| 7482 | Rn5-8s         | -1.08 | 0    | 1261.32 | 0    | 1164.2 |   |
| 7483 | Pabpc1         | -1.08 | 1431 | 185.27  | 1772 | 171    |   |
| 7484 | LOC100911674   | -1.08 | 137  | 15.47   | 167  | 14.28  |   |
| 7485 | Tsta3          | -1.08 | 74   | 16.68   | 97   | 15.4   |   |
| 7486 | Arih2          | -1.08 | 291  | 19.8    | 397  | 18.27  |   |
| 7487 | Araf           | -1.08 | 189  | 23.9    | 252  | 22.05  |   |
| 7488 | Ppp2r5e        | -1.08 | 302  | 12.32   | 341  | 11.36  |   |
| 7489 | Usp20          | -1.08 | 129  | 7.67    | 160  | 7.07   |   |
| 7490 | Mrm1           | -1.08 | 42   | 3.8     | 52   | 3.51   |   |
| 7491 | Ppp1r13b       | -1.08 | 110  | 8.91    | 141  | 8.21   |   |
| 7492 | RNase_MRP      | -1.08 | 30   | 39.93   | 37   | 36.82  |   |
| 7493 | Slc4a2         | -1.08 | 381  | 32.16   | 482  | 29.65  |   |

Supplemental Table 3  
 FSH + Ad-E versus FSH + Ad-FOXO1(A3), 24 hours

|      | A         | B     | C    | D      | E    | F      | G |
|------|-----------|-------|------|--------|------|--------|---|
| 7494 | Zfp53     | -1.08 | 30   | 5.49   | 42   | 5.06   |   |
| 7495 | Plcd3     | -1.08 | 33   | 3.7    | 50   | 3.41   |   |
| 7496 | Polr3f    | -1.08 | 72   | 4.72   | 98   | 4.36   |   |
| 7497 | Rffl      | -1.08 | 50   | 2.63   | 70   | 2.43   |   |
| 7498 | Tcf7l1    | -1.08 | 254  | 12.89  | 359  | 11.88  |   |
| 7499 | Rpl5      | -1.08 | 630  | 348.86 | 771  | 321.59 |   |
| 7500 | Brcc3     | -1.08 | 73   | 10.5   | 89   | 9.68   |   |
| 7501 | Fbxw4     | -1.08 | 148  | 13.71  | 242  | 12.64  |   |
| 7502 | Pcbp2     | -1.08 | 304  | 94.82  | 318  | 87.39  |   |
| 7503 | Cebpb     | -1.09 | 42   | 11.15  | 53   | 10.28  |   |
| 7504 | Clns1a    | -1.09 | 98   | 21.55  | 134  | 19.86  |   |
| 7505 | Jarid2    | -1.09 | 135  | 7.37   | 195  | 6.79   |   |
| 7506 | Trub1     | -1.09 | 99   | 4.38   | 137  | 4.04   |   |
| 7507 | Zfp719    | -1.09 | 66   | 7.15   | 68   | 6.59   |   |
| 7508 | Dcaf5     | -1.09 | 244  | 12.19  | 299  | 11.23  |   |
| 7509 | Afg3l2    | -1.09 | 174  | 13.19  | 220  | 12.15  |   |
| 7510 | Pkdcc     | -1.09 | 67   | 10.93  | 77   | 10.07  |   |
| 7511 | Itga5     | -1.09 | 71   | 5.68   | 87   | 5.24   |   |
| 7512 | Ints4     | -1.09 | 158  | 12.33  | 192  | 11.35  |   |
| 7513 | Tsc2      | -1.09 | 248  | 13.65  | 315  | 12.56  |   |
| 7514 | Ece1      | -1.09 | 1318 | 99.3   | 1635 | 91.39  |   |
| 7515 | Ybx1      | -1.09 | 110  | 126.15 | 139  | 116.09 |   |
| 7516 | Foxred1   | -1.09 | 37   | 5.01   | 45   | 4.61   |   |
| 7517 | Glr2      | -1.09 | 21   | 9.93   | 35   | 9.14   |   |
| 7518 | Mgme1     | -1.09 | 13   | 2.3    | 17   | 2.12   |   |
| 7519 | Ntmt1     | -1.09 | 73   | 11.29  | 72   | 10.39  |   |
| 7520 | SNORD87   | -1.09 | 0    | 55.38  | 0    | 50.95  |   |
| 7521 | Sp100     | -1.09 | 20   | 4.63   | 32   | 4.26   |   |
| 7522 | Ttc39b    | -1.09 | 26   | 1.76   | 25   | 1.62   |   |
| 7523 | Vps45     | -1.09 | 85   | 11.79  | 124  | 10.85  |   |
| 7524 | Zbtb8os   | -1.09 | 63   | 11.56  | 73   | 10.63  |   |
| 7525 | Zfp715    | -1.09 | 52   | 7.34   | 64   | 6.75   |   |
| 7526 | Tex9      | -1.09 | 33   | 2.85   | 29   | 2.62   |   |
| 7527 | Prkcsh    | -1.09 | 547  | 93.86  | 670  | 86.35  |   |
| 7528 | Uba1      | -1.09 | 1020 | 101.22 | 1260 | 93.11  |   |
| 7529 | Mtor      | -1.09 | 367  | 13.22  | 465  | 12.16  |   |
| 7530 | Mrfap1_2  | -1.09 | 416  | 106.24 | 455  | 97.72  |   |
| 7531 | Trpc4ap   | -1.09 | 595  | 59.52  | 780  | 54.74  |   |
| 7532 | Rtel1     | -1.09 | 145  | 9.34   | 196  | 8.59   |   |
| 7533 | Trim8     | -1.09 | 96   | 9.18   | 126  | 8.44   |   |
| 7534 | Smu1      | -1.09 | 188  | 34.65  | 240  | 31.86  |   |
| 7535 | Pwwp2a    | -1.09 | 152  | 7.71   | 171  | 7.09   |   |
| 7536 | Gba       | -1.09 | 162  | 30.9   | 207  | 28.41  |   |
| 7537 | Papss1    | -1.09 | 189  | 24.19  | 246  | 22.24  |   |
| 7538 | Bcl2l11   | -1.09 | 59   | 3.38   | 81   | 3.11   |   |
| 7539 | Cacnb3    | -1.09 | 150  | 18.81  | 197  | 17.28  |   |
| 7540 | LOC689574 | -1.09 | 133  | 56.29  | 164  | 51.71  |   |
| 7541 | Megf9     | -1.09 | 137  | 13.09  | 189  | 12.02  |   |
| 7542 | Stk4      | -1.09 | 290  | 16.34  | 356  | 15.01  |   |
| 7543 | Man2c1    | -1.09 | 231  | 21.03  | 262  | 19.32  |   |
| 7544 | Psmg1     | -1.09 | 73   | 25.24  | 96   | 23.19  |   |
| 7545 | Ints6     | -1.09 | 139  | 8.4    | 185  | 7.71   |   |
| 7546 | Shc1      | -1.09 | 217  | 20.87  | 275  | 19.17  |   |
| 7547 | Supt4h1   | -1.09 | 92   | 24.32  | 131  | 22.34  |   |

Supplemental Table 3  
 FSH + Ad-E versus FSH + Ad-FOXO1(A3), 24 hours

|      | A              | B     | C    | D      | E    | F      | G |
|------|----------------|-------|------|--------|------|--------|---|
| 7548 | Zbtb24         | -1.09 | 97   | 6.72   | 117  | 6.18   |   |
| 7549 | Acbd6          | -1.09 | 84   | 8.59   | 133  | 7.89   |   |
| 7550 | Fem1b          | -1.09 | 172  | 25.21  | 238  | 23.15  |   |
| 7551 | Rybp           | -1.09 | 178  | 13.41  | 235  | 12.32  |   |
| 7552 | Mrpl51         | -1.09 | 92   | 14.08  | 112  | 12.93  |   |
| 7553 | Pdpr           | -1.09 | 126  | 11.01  | 155  | 10.11  |   |
| 7554 | Rpl4           | -1.09 | 1561 | 486.33 | 1870 | 446.53 |   |
| 7555 | Samd4b         | -1.09 | 323  | 25.86  | 398  | 23.74  |   |
| 7556 | Srp72          | -1.09 | 213  | 19.01  | 265  | 17.45  |   |
| 7557 | Akt1           | -1.09 | 472  | 67.68  | 582  | 62.13  |   |
| 7558 | Ago2           | -1.09 | 135  | 14.29  | 169  | 13.12  |   |
| 7559 | Cmtm4          | -1.09 | 36   | 5.51   | 53   | 5.05   |   |
| 7560 | Paxip1         | -1.09 | 128  | 8.99   | 170  | 8.25   |   |
| 7561 | RGD1566265     | -1.09 | 24   | 6.49   | 32   | 5.96   |   |
| 7562 | Grik1          | -1.09 | 34   | 2.58   | 47   | 2.37   |   |
| 7563 | Zfp266         | -1.09 | 922  | 51.7   | 1138 | 47.43  |   |
| 7564 | Psma3          | -1.09 | 242  | 27.37  | 275  | 25.1   |   |
| 7565 | Tor1b          | -1.09 | 94   | 9.29   | 108  | 8.52   |   |
| 7566 | Esr2           | -1.09 | 706  | 50.58  | 962  | 46.38  |   |
| 7567 | Eif2b1         | -1.09 | 65   | 10.85  | 78   | 9.95   |   |
| 7568 | Recql5         | -1.09 | 85   | 4.91   | 111  | 4.51   |   |
| 7569 | Rnpep          | -1.09 | 117  | 16.46  | 149  | 15.09  |   |
| 7570 | Cers5          | -1.09 | 243  | 25.91  | 309  | 23.76  |   |
| 7571 | Grb2_2         | -1.09 | 273  | 50.26  | 352  | 46.08  |   |
| 7572 | Npc2           | -1.09 | 507  | 121.07 | 676  | 110.99 |   |
| 7573 | Aco1           | -1.09 | 451  | 42.53  | 558  | 38.98  |   |
| 7574 | Atp6v0d1       | -1.09 | 382  | 74.02  | 504  | 67.84  |   |
| 7575 | Lrp3           | -1.09 | 38   | 2.88   | 41   | 2.64   |   |
| 7576 | Mvk            | -1.09 | 49   | 9.45   | 51   | 8.66   |   |
| 7577 | Pced1b         | -1.09 | 102  | 5.62   | 101  | 5.15   |   |
| 7578 | Zfp167         | -1.09 | 55   | 2.32   | 94   | 2.13   |   |
| 7579 | Setd1a         | -1.09 | 347  | 20.11  | 427  | 18.43  |   |
| 7580 | Map3k4         | -1.09 | 202  | 11.58  | 244  | 10.61  |   |
| 7581 | Babam1         | -1.09 | 81   | 19.1   | 104  | 17.5   |   |
| 7582 | Dbt            | -1.09 | 78   | 8.16   | 102  | 7.47   |   |
| 7583 | Clcn7          | -1.09 | 134  | 14.62  | 170  | 13.39  |   |
| 7584 | LOC100360573_1 | -1.09 | 64   | 228.04 | 47   | 208.88 |   |
| 7585 | Cbfb           | -1.09 | 226  | 23.83  | 306  | 21.83  |   |
| 7586 | Txnip          | -1.09 | 1276 | 167.44 | 1561 | 153.36 |   |
| 7587 | Commd4         | -1.09 | 72   | 14.51  | 80   | 13.29  |   |
| 7588 | Ssrp1          | -1.09 | 515  | 59.7   | 633  | 54.66  |   |
| 7589 | Man1a1         | -1.09 | 308  | 14.62  | 425  | 13.39  |   |
| 7590 | Bod1           | -1.09 | 63   | 12.16  | 92   | 11.13  |   |
| 7591 | Cadm1          | -1.09 | 59   | 8.16   | 74   | 7.47   |   |
| 7592 | Mdh2           | -1.09 | 360  | 96.62  | 441  | 88.45  |   |
| 7593 | Mrpl20         | -1.09 | 70   | 27.67  | 82   | 25.32  |   |
| 7594 | Vezf1          | -1.09 | 269  | 21.88  | 334  | 20.02  |   |
| 7595 | Tcn2           | -1.09 | 192  | 34.89  | 238  | 31.93  |   |
| 7596 | Tars2          | -1.09 | 94   | 10.3   | 126  | 9.42   |   |
| 7597 | Ppia           | -1.09 | 191  | 594    | 156  | 543.47 |   |
| 7598 | Wdr81          | -1.09 | 164  | 7.98   | 200  | 7.3    |   |
| 7599 | Kdelc1         | -1.09 | 93   | 13.9   | 107  | 12.72  |   |
| 7600 | Atp13a2        | -1.09 | 184  | 12.29  | 228  | 11.24  |   |
| 7601 | Ruvbl1         | -1.09 | 94   | 17.9   | 92   | 16.38  |   |

Supplemental Table 3  
 FSH + Ad-E versus FSH + Ad-FOXO1(A3), 24 hours

|      | A             | B     | C    | D      | E    | F      | G |
|------|---------------|-------|------|--------|------|--------|---|
| 7602 | Gng5_2        | -1.09 | 49   | 22.09  | 61   | 20.21  |   |
| 7603 | Xpnpep3       | -1.09 | 113  | 5.24   | 139  | 4.8    |   |
| 7604 | Zfp574        | -1.09 | 111  | 13.24  | 136  | 12.11  |   |
| 7605 | Dip2b         | -1.09 | 232  | 8.77   | 295  | 8.02   |   |
| 7606 | Rn60_1_1361.1 | -1.09 | 9    | 0.41   | 11   | 0.38   |   |
| 7607 | Rsl1d1        | -1.09 | 0    | 2.01   | 0    | 1.83   |   |
| 7608 | Sf3a3         | -1.09 | 150  | 16.75  | 191  | 15.3   |   |
| 7609 | Utp23         | -1.09 | 19   | 5.78   | 26   | 5.28   |   |
| 7610 | Aaas          | -1.09 | 80   | 10.23  | 104  | 9.35   |   |
| 7611 | Adam22        | -1.09 | 21   | 1.4    | 31   | 1.28   |   |
| 7612 | Chchd3        | -1.09 | 131  | 17.33  | 172  | 15.84  |   |
| 7613 | Hamp          | -1.09 | 12   | 9.05   | 12   | 8.27   |   |
| 7614 | Map3k14       | -1.09 | 27   | 0.77   | 39   | 0.71   |   |
| 7615 | Meis3         | -1.09 | 29   | 4.97   | 39   | 4.54   |   |
| 7616 | Npdc1         | -1.09 | 196  | 33.67  | 304  | 30.76  |   |
| 7617 | Rpl35a_4      | -1.09 | 0    | 9.79   | 0    | 8.94   |   |
| 7618 | Smpd2         | -1.09 | 37   | 7.82   | 49   | 7.15   |   |
| 7619 | Stk36         | -1.09 | 51   | 2.59   | 65   | 2.37   |   |
| 7620 | Tceanc2       | -1.09 | 50   | 8.39   | 68   | 7.67   |   |
| 7621 | Tmem126b      | -1.09 | 71   | 10.67  | 104  | 9.75   |   |
| 7622 | Unc5c         | -1.09 | 28   | 0.7    | 40   | 0.64   |   |
| 7623 | Vash1         | -1.09 | 18   | 3.1    | 23   | 2.83   |   |
| 7624 | Wdr20         | -1.09 | 118  | 3.86   | 182  | 3.53   |   |
| 7625 | Zfp866_2      | -1.09 | 9    | 2.84   | 11   | 2.59   |   |
| 7626 | Rab20         | -1.09 | 11   | 2.2    | 18   | 2.01   |   |
| 7627 | Anxa2         | -1.09 | 629  | 159.98 | 777  | 146.17 |   |
| 7628 | Prkd3         | -1.09 | 248  | 19.27  | 318  | 17.6   |   |
| 7629 | Zfp444        | -1.09 | 199  | 13.02  | 244  | 11.89  |   |
| 7630 | Prrc2a        | -1.1  | 1813 | 97.26  | 2210 | 88.82  |   |
| 7631 | LOC100909464  | -1.1  | 123  | 30.11  | 157  | 27.49  |   |
| 7632 | Cnm2          | -1.1  | 102  | 8.52   | 164  | 7.77   |   |
| 7633 | Prkdc         | -1.1  | 174  | 3.6    | 201  | 3.28   |   |
| 7634 | Elmo2         | -1.1  | 157  | 22.43  | 158  | 20.47  |   |
| 7635 | Calm1         | -1.1  | 722  | 176.91 | 897  | 161.41 |   |
| 7636 | Mex3c         | -1.1  | 208  | 25.58  | 268  | 23.34  |   |
| 7637 | Necap2        | -1.1  | 185  | 28.63  | 234  | 26.11  |   |
| 7638 | Pcdhga10      | -1.1  | 50   | 7.5    | 61   | 6.84   |   |
| 7639 | Zc3h18        | -1.1  | 258  | 16.42  | 312  | 14.98  |   |
| 7640 | Hps1          | -1.1  | 151  | 12.06  | 182  | 11     |   |
| 7641 | Zfyve9        | -1.1  | 198  | 12.16  | 260  | 11.09  |   |
| 7642 | Xrcc1         | -1.1  | 106  | 15.86  | 127  | 14.46  |   |
| 7643 | Rps8          | -1.1  | 165  | 305.37 | 163  | 278.47 |   |
| 7644 | Psmc2         | -1.1  | 288  | 62.27  | 360  | 56.78  |   |
| 7645 | Mccc2         | -1.1  | 219  | 28.2   | 294  | 25.72  |   |
| 7646 | E4f1          | -1.1  | 101  | 10.87  | 118  | 9.91   |   |
| 7647 | LOC683674     | -1.1  | 54   | 7.14   | 67   | 6.51   |   |
| 7648 | Smdt1         | -1.1  | 41   | 45.82  | 51   | 41.77  |   |
| 7649 | Ube2d1        | -1.1  | 49   | 10.92  | 72   | 9.95   |   |
| 7650 | Ube2o         | -1.1  | 268  | 21.81  | 328  | 19.88  |   |
| 7651 | Gfer          | -1.1  | 72   | 21.54  | 90   | 19.63  |   |
| 7652 | Nelfcd        | -1.1  | 207  | 30.22  | 228  | 27.55  |   |
| 7653 | Ttc1          | -1.1  | 113  | 18.42  | 138  | 16.79  |   |
| 7654 | Prpf8         | -1.1  | 1726 | 84.05  | 2135 | 76.61  |   |
| 7655 | Ambra1        | -1.1  | 501  | 23.75  | 646  | 21.65  |   |

Supplemental Table 3  
 FSH + Ad-E versus FSH + Ad-FOXO1(A3), 24 hours

|      | A              | B    | C    | D      | E    | F      | G |
|------|----------------|------|------|--------|------|--------|---|
| 7656 | Mbd1           | -1.1 | 225  | 20.11  | 284  | 18.33  |   |
| 7657 | Ppie           | -1.1 | 71   | 18.57  | 94   | 16.92  |   |
| 7658 | Fkbp14         | -1.1 | 51   | 8.63   | 49   | 7.86   |   |
| 7659 | RGD1304884     | -1.1 | 70   | 6.21   | 85   | 5.66   |   |
| 7660 | Qsox1          | -1.1 | 143  | 13.17  | 177  | 12     |   |
| 7661 | Nploc4         | -1.1 | 430  | 30.46  | 531  | 27.75  |   |
| 7662 | Dnal4          | -1.1 | 67   | 13.45  | 72   | 12.25  |   |
| 7663 | Wdr45b         | -1.1 | 191  | 15.59  | 237  | 14.2   |   |
| 7664 | Mknk2          | -1.1 | 301  | 30.6   | 362  | 27.87  |   |
| 7665 | Nampt          | -1.1 | 88   | 10.51  | 116  | 9.57   |   |
| 7666 | Abcd3          | -1.1 | 1030 | 90.79  | 1279 | 82.67  |   |
| 7667 | Tspan6         | -1.1 | 189  | 40.36  | 228  | 36.74  |   |
| 7668 | Fbxo11         | -1.1 | 165  | 15.65  | 217  | 14.24  |   |
| 7669 | Gnpda1         | -1.1 | 74   | 12.29  | 86   | 11.18  |   |
| 7670 | Psmc13         | -1.1 | 258  | 53.11  | 319  | 48.34  |   |
| 7671 | Kbtbd3         | -1.1 | 24   | 1.71   | 32   | 1.56   |   |
| 7672 | Ddx47          | -1.1 | 132  | 20.38  | 176  | 18.54  |   |
| 7673 | Utp15          | -1.1 | 62   | 8.27   | 78   | 7.52   |   |
| 7674 | Smarcd2        | -1.1 | 247  | 30.51  | 307  | 27.75  |   |
| 7675 | Cnot3          | -1.1 | 196  | 20.85  | 226  | 18.96  |   |
| 7676 | Laptm4a        | -1.1 | 1168 | 219.91 | 1415 | 199.98 |   |
| 7677 | LOC502894      | -1.1 | 37   | 4.94   | 54   | 4.49   |   |
| 7678 | AABR07002768.1 | -1.1 | 30   | 4.3    | 40   | 3.91   |   |
| 7679 | Prkra          | -1.1 | 168  | 25.61  | 207  | 23.29  |   |
| 7680 | RGD1305464     | -1.1 | 81   | 6.69   | 92   | 6.09   |   |
| 7681 | Tomm34         | -1.1 | 75   | 15.03  | 105  | 13.66  |   |
| 7682 | Uba2           | -1.1 | 82   | 29.97  | 94   | 27.25  |   |
| 7683 | Blcap          | -1.1 | 125  | 23.4   | 152  | 21.27  |   |
| 7684 | Cdk9           | -1.1 | 197  | 41.1   | 240  | 37.35  |   |
| 7685 | Slc3a2         | -1.1 | 273  | 44.95  | 331  | 40.85  |   |
| 7686 | Zfp787         | -1.1 | 74   | 9.75   | 93   | 8.87   |   |
| 7687 | Ndufv2         | -1.1 | 102  | 32.17  | 137  | 29.23  |   |
| 7688 | AY172581.19    | -1.1 | 68   | 367.32 | 85   | 333.46 |   |
| 7689 | Dennd1b        | -1.1 | 83   | 6.32   | 133  | 5.73   |   |
| 7690 | Hsph1          | -1.1 | 260  | 25.01  | 313  | 22.7   |   |
| 7691 | Patz1          | -1.1 | 248  | 17.72  | 309  | 16.08  |   |
| 7692 | Rn60_X_0744.1  | -1.1 | 12   | 18.91  | 17   | 17.17  |   |
| 7693 | Sgol1          | -1.1 | 16   | 1.14   | 18   | 1.04   |   |
| 7694 | Tipr1          | -1.1 | 102  | 17.5   | 139  | 15.89  |   |
| 7695 | Tyw5           | -1.1 | 28   | 3.44   | 40   | 3.12   |   |
| 7696 | Fahd1          | -1.1 | 28   | 7.05   | 34   | 6.4    |   |
| 7697 | LOC100910792   | -1.1 | 17   | 2.25   | 22   | 2.05   |   |
| 7698 | Mthfd1         | -1.1 | 172  | 18.25  | 217  | 16.57  |   |
| 7699 | Nr4a2          | -1.1 | 15   | 1.5    | 19   | 1.36   |   |
| 7700 | Nt5c3a         | -1.1 | 88   | 10.06  | 113  | 9.13   |   |
| 7701 | Nnt            | -1.1 | 485  | 38.56  | 598  | 35     |   |
| 7702 | Atg13          | -1.1 | 161  | 33.01  | 199  | 29.95  |   |
| 7703 | Scp2           | -1.1 | 170  | 10.96  | 209  | 9.95   |   |
| 7704 | Ift52          | -1.1 | 131  | 18.53  | 159  | 16.81  |   |
| 7705 | Pfdn1          | -1.1 | 122  | 29.29  | 181  | 26.58  |   |
| 7706 | Ctr9           | -1.1 | 373  | 27.85  | 459  | 25.27  |   |
| 7707 | Procr          | -1.1 | 79   | 18.47  | 93   | 16.76  |   |
| 7708 | Vapa           | -1.1 | 394  | 66.72  | 492  | 60.52  |   |
| 7709 | Xpot           | -1.1 | 198  | 12.58  | 249  | 11.41  |   |

Supplemental Table 3  
 FSH + Ad-E versus FSH + Ad-FOXO1(A3), 24 hours

|      | A            | B     | C    | D      | E    | F      | G |
|------|--------------|-------|------|--------|------|--------|---|
| 7710 | Ubxn2b       | -1.1  | 170  | 9.08   | 233  | 8.23   |   |
| 7711 | LOC100362023 | -1.1  | 241  | 25.07  | 299  | 22.74  |   |
| 7712 | Mrpl10       | -1.1  | 51   | 9.77   | 62   | 8.86   |   |
| 7713 | Rufy3        | -1.1  | 93   | 4.67   | 116  | 4.23   |   |
| 7714 | Amfr         | -1.1  | 992  | 172.03 | 1262 | 155.97 |   |
| 7715 | Pknx2        | -1.1  | 436  | 26.73  | 591  | 24.23  |   |
| 7716 | Bap1         | -1.1  | 343  | 32.72  | 420  | 29.66  |   |
| 7717 | Pqbp1        | -1.1  | 195  | 20.06  | 206  | 18.18  |   |
| 7718 | Tk1          | -1.1  | 47   | 5.39   | 52   | 4.88   |   |
| 7719 | Aldh9a1      | -1.1  | 148  | 26.35  | 173  | 23.87  |   |
| 7720 | Chfr         | -1.1  | 129  | 9.76   | 149  | 8.85   |   |
| 7721 | Igf1         | -1.1  | 315  | 41.76  | 420  | 37.83  |   |
| 7722 | Zfp800       | -1.1  | 75   | 5.89   | 98   | 5.34   |   |
| 7723 | Nrd1         | -1.1  | 367  | 26.79  | 475  | 24.26  |   |
| 7724 | Evi5         | -1.1  | 217  | 11.2   | 279  | 10.14  |   |
| 7725 | Tspyl1       | -1.1  | 127  | 18.11  | 155  | 16.4   |   |
| 7726 | LOC102555919 | -1.1  | 20   | 1.62   | 26   | 1.47   |   |
| 7727 | Arhgap33     | -1.1  | 19   | 1.64   | 23   | 1.49   |   |
| 7728 | Bnip1        | -1.1  | 30   | 6.22   | 35   | 5.63   |   |
| 7729 | Cisd2        | -1.1  | 160  | 19.12  | 195  | 17.3   |   |
| 7730 | Cog7         | -1.1  | 90   | 9.77   | 122  | 8.84   |   |
| 7731 | Fan1         | -1.1  | 48   | 2.65   | 64   | 2.4    |   |
| 7732 | Hsd17b8      | -1.1  | 22   | 4.49   | 24   | 4.07   |   |
| 7733 | Ing5         | -1.1  | 129  | 8.79   | 162  | 7.95   |   |
| 7734 | Rapgef1      | -1.1  | 281  | 21.5   | 372  | 19.46  |   |
| 7735 | Mfsd10       | -1.1  | 145  | 24.6   | 161  | 22.26  |   |
| 7736 | Polr2a       | -1.1  | 1044 | 55.21  | 1273 | 49.96  |   |
| 7737 | Fam210a      | -1.11 | 161  | 5.46   | 198  | 4.94   |   |
| 7738 | Thtpa        | -1.11 | 115  | 17.19  | 143  | 15.55  |   |
| 7739 | Ppm1k        | -1.11 | 120  | 13.34  | 157  | 12.07  |   |
| 7740 | Copg1        | -1.11 | 642  | 39.77  | 758  | 35.97  |   |
| 7741 | Copa         | -1.11 | 916  | 66.99  | 1150 | 60.59  |   |
| 7742 | Chd7         | -1.11 | 72   | 2.27   | 92   | 2.05   |   |
| 7743 | Rbm10        | -1.11 | 205  | 20.62  | 258  | 18.65  |   |
| 7744 | Lima1        | -1.11 | 60   | 3.58   | 74   | 3.23   |   |
| 7745 | Smim20       | -1.11 | 61   | 17.49  | 85   | 15.82  |   |
| 7746 | Srd5a3       | -1.11 | 110  | 19.58  | 133  | 17.71  |   |
| 7747 | Lin37        | -1.11 | 48   | 15.6   | 58   | 14.1   |   |
| 7748 | Pdp2         | -1.11 | 43   | 7.36   | 52   | 6.65   |   |
| 7749 | Slc35e3      | -1.11 | 148  | 17.24  | 202  | 15.58  |   |
| 7750 | Pabpc4       | -1.11 | 245  | 41.19  | 286  | 37.22  |   |
| 7751 | Atxn7l4      | -1.11 | 114  | 1.92   | 126  | 1.73   |   |
| 7752 | Gca          | -1.11 | 28   | 4.7    | 52   | 4.25   |   |
| 7753 | Mad2l1       | -1.11 | 29   | 6.1    | 37   | 5.51   |   |
| 7754 | Msrb1        | -1.11 | 27   | 10     | 38   | 9.03   |   |
| 7755 | Papd4        | -1.11 | 138  | 14.12  | 195  | 12.76  |   |
| 7756 | Pop7         | -1.11 | 24   | 10.31  | 32   | 9.31   |   |
| 7757 | Sdccag8      | -1.11 | 182  | 3.15   | 379  | 2.85   |   |
| 7758 | Prickle3     | -1.11 | 38   | 4.01   | 65   | 3.62   |   |
| 7759 | Llgl1        | -1.11 | 316  | 31.23  | 383  | 28.21  |   |
| 7760 | Rbm22        | -1.11 | 115  | 21.56  | 148  | 19.47  |   |
| 7761 | Suco         | -1.11 | 176  | 11.18  | 236  | 10.09  |   |
| 7762 | Chtf8        | -1.11 | 429  | 50.32  | 529  | 45.43  |   |
| 7763 | Lamtor3      | -1.11 | 66   | 15.85  | 83   | 14.31  |   |



Supplemental Table 3  
 FSH + Ad-E versus FSH + Ad-FOXO1(A3), 24 hours

|      | A              | B     | C     | D       | E     | F      | G |
|------|----------------|-------|-------|---------|-------|--------|---|
| 7764 | Mad2l2         | -1.11 | 36    | 6.98    | 38    | 6.3    |   |
| 7765 | Wdr34          | -1.11 | 57    | 4.8     | 67    | 4.33   |   |
| 7766 | Mettl6         | -1.11 | 44    | 6.39    | 66    | 5.76   |   |
| 7767 | Napg           | -1.11 | 115   | 8.78    | 132   | 7.92   |   |
| 7768 | Prdm11         | -1.11 | 51    | 1.72    | 68    | 1.55   |   |
| 7769 | Lpl            | -1.11 | 29    | 2.86    | 36    | 2.58   |   |
| 7770 | Xpo4           | -1.11 | 133   | 4.55    | 174   | 4.1    |   |
| 7771 | Hs2st1         | -1.11 | 213   | 16.19   | 259   | 14.6   |   |
| 7772 | Ruvbl2         | -1.11 | 109   | 19.48   | 121   | 17.57  |   |
| 7773 | Ubl7           | -1.11 | 202   | 50.24   | 244   | 45.31  |   |
| 7774 | Ascc1          | -1.11 | 198   | 30.72   | 216   | 27.71  |   |
| 7775 | Tmem237        | -1.11 | 92    | 4.28    | 103   | 3.86   |   |
| 7776 | Rnps1          | -1.11 | 352   | 66.57   | 427   | 60.02  |   |
| 7777 | Atad3a         | -1.11 | 130   | 15.68   | 157   | 14.13  |   |
| 7778 | Mfap3          | -1.11 | 112   | 19.41   | 139   | 17.5   |   |
| 7779 | Setd1b         | -1.11 | 149   | 8.28    | 188   | 7.46   |   |
| 7780 | Slc29a3        | -1.11 | 109   | 9.34    | 145   | 8.42   |   |
| 7781 | Dhx37          | -1.11 | 151   | 12.06   | 179   | 10.87  |   |
| 7782 | Gga2           | -1.11 | 87    | 9.41    | 109   | 8.48   |   |
| 7783 | Prkaa1         | -1.11 | 162   | 11.31   | 206   | 10.19  |   |
| 7784 | Rraga          | -1.11 | 146   | 33.1    | 175   | 29.83  |   |
| 7785 | Zfp133         | -1.11 | 62    | 6.19    | 76    | 5.58   |   |
| 7786 | Crel2          | -1.11 | 89    | 21.04   | 109   | 18.96  |   |
| 7787 | Rassf3         | -1.11 | 61    | 4.29    | 78    | 3.87   |   |
| 7788 | Uevld          | -1.11 | 63    | 5.2     | 105   | 4.68   |   |
| 7789 | Capn5          | -1.11 | 201   | 14.28   | 258   | 12.86  |   |
| 7790 | RT1-CE10       | -1.11 | 72    | 17.92   | 101   | 16.14  |   |
| 7791 | Mat2a          | -1.11 | 409   | 49.78   | 490   | 44.82  |   |
| 7792 | Ppp4r1         | -1.11 | 400   | 33.26   | 508   | 29.94  |   |
| 7793 | AABR07061902.1 | -1.11 | 46    | 14.78   | 50    | 13.31  |   |
| 7794 | Ints7          | -1.11 | 193   | 16.12   | 244   | 14.51  |   |
| 7795 | Supt5h         | -1.11 | 569   | 53      | 695   | 47.7   |   |
| 7796 | Vangl2         | -1.11 | 59    | 4.68    | 71    | 4.21   |   |
| 7797 | Bmp1           | -1.11 | 417   | 34.65   | 502   | 31.17  |   |
| 7798 | Cdh3           | -1.11 | 67    | 5.83    | 79    | 5.25   |   |
| 7799 | Actb           | -1.11 | 11218 | 2956.77 | 13609 | 2659.8 |   |
| 7800 | Heatr6         | -1.11 | 150   | 11.84   | 190   | 10.65  |   |
| 7801 | Rps23_1        | -1.11 | 142   | 199.49  | 131   | 179.4  |   |
| 7802 | Cc2d1b         | -1.11 | 153   | 15.56   | 193   | 13.99  |   |
| 7803 | Tada3          | -1.11 | 94    | 13.83   | 122   | 12.43  |   |
| 7804 | Acsl3          | -1.11 | 94    | 11.62   | 112   | 10.45  |   |
| 7805 | Mogs           | -1.11 | 0     | 12.28   | 0     | 11.03  |   |
| 7806 | Rnf31          | -1.11 | 102   | 10.02   | 128   | 9      |   |
| 7807 | Trim5          | -1.11 | 182   | 13.91   | 222   | 12.5   |   |
| 7808 | Rab35          | -1.11 | 136   | 21.5    | 164   | 19.32  |   |
| 7809 | Taldo1         | -1.11 | 149   | 40.69   | 175   | 36.54  |   |
| 7810 | P4ha1          | -1.11 | 401   | 54.28   | 499   | 48.75  |   |
| 7811 | Cyb5b          | -1.11 | 275   | 19.74   | 342   | 17.72  |   |
| 7812 | Plbd2          | -1.11 | 369   | 59.19   | 446   | 53.15  |   |
| 7813 | Psap           | -1.11 | 1324  | 183.71  | 1602  | 164.97 |   |
| 7814 | Trim28         | -1.11 | 796   | 99.63   | 961   | 89.44  |   |
| 7815 | Lrp1           | -1.11 | 2903  | 70.43   | 3490  | 63.19  |   |
| 7816 | AABR07001435.1 | -1.11 | 4     | 1.47    | 5     | 1.32   |   |
| 7817 | Acer2          | -1.11 | 8     | 0.35    | 14    | 0.31   |   |

Supplemental Table 3  
 FSH + Ad-E versus FSH + Ad-FOXO1(A3), 24 hours

|      | A              | B     | C   | D      | E   | F      | G |
|------|----------------|-------|-----|--------|-----|--------|---|
| 7818 | Baz1b          | -1.11 | 570 | 25.96  | 707 | 23.29  |   |
| 7819 | Cbfa2t2        | -1.11 | 167 | 11.84  | 221 | 10.62  |   |
| 7820 | Cpne7          | -1.11 | 7   | 0.75   | 8   | 0.67   |   |
| 7821 | Cracr2b_2      | -1.11 | 1   | 1.14   | 2   | 1.03   |   |
| 7822 | Gemin2         | -1.11 | 45  | 3.85   | 51  | 3.45   |   |
| 7823 | Igsf10         | -1.11 | 52  | 1.65   | 65  | 1.48   |   |
| 7824 | Inafm1         | -1.11 | 5   | 1.22   | 6   | 1.09   |   |
| 7825 | Kcnb1          | -1.11 | 21  | 1.63   | 28  | 1.46   |   |
| 7826 | Kdm4b          | -1.11 | 263 | 9.98   | 350 | 8.95   |   |
| 7827 | Kin            | -1.11 | 39  | 4.94   | 39  | 4.43   |   |
| 7828 | Mrpl17         | -1.11 | 95  | 32.92  | 109 | 29.53  |   |
| 7829 | Polr2d         | -1.11 | 85  | 24.35  | 96  | 21.85  |   |
| 7830 | Prr22          | -1.11 | 5   | 0.8    | 4   | 0.72   |   |
| 7831 | Sec16b         | -1.11 | 7   | 0.42   | 7   | 0.37   |   |
| 7832 | Slc22a18       | -1.11 | 18  | 2.36   | 26  | 2.11   |   |
| 7833 | SNORD12_3      | -1.11 | 0   | 59.68  | 0   | 53.54  |   |
| 7834 | Yod1           | -1.11 | 19  | 3.44   | 18  | 3.08   |   |
| 7835 | AABR07034532.1 | -1.11 | 0   | 3.47   | 0   | 3.12   |   |
| 7836 | Aarsd1         | -1.11 | 42  | 3.83   | 53  | 3.44   |   |
| 7837 | AC111257.2     | -1.11 | 0   | 0.67   | 0   | 0.6    |   |
| 7838 | Arf5           | -1.11 | 335 | 113.04 | 404 | 101.41 |   |
| 7839 | Atad2          | -1.11 | 75  | 5.71   | 99  | 5.12   |   |
| 7840 | Bbs12          | -1.11 | 10  | 1.44   | 12  | 1.29   |   |
| 7841 | Catsperd       | -1.11 | 65  | 2.61   | 57  | 2.34   |   |
| 7842 | Cdkn3          | -1.11 | 14  | 4.13   | 16  | 3.7    |   |
| 7843 | Cenpi          | -1.11 | 25  | 1.63   | 36  | 1.46   |   |
| 7844 | Col27a1        | -1.11 | 115 | 5.2    | 124 | 4.67   |   |
| 7845 | Cyb561         | -1.11 | 9   | 0.68   | 7   | 0.61   |   |
| 7846 | Cyp2u1         | -1.11 | 117 | 9.12   | 128 | 8.18   |   |
| 7847 | Dact3          | -1.11 | 5   | 0.65   | 8   | 0.58   |   |
| 7848 | Esp1           | -1.11 | 38  | 2.12   | 46  | 1.9    |   |
| 7849 | Fam103a1       | -1.11 | 16  | 6.87   | 19  | 6.16   |   |
| 7850 | Fam109b        | -1.11 | 6   | 0.68   | 6   | 0.61   |   |
| 7851 | Gpalpp1        | -1.11 | 44  | 8.5    | 51  | 7.63   |   |
| 7852 | Minpp1         | -1.11 | 122 | 25.15  | 168 | 22.57  |   |
| 7853 | Nudt19         | -1.11 | 29  | 6.3    | 36  | 5.66   |   |
| 7854 | Pxmp2          | -1.11 | 20  | 1.98   | 32  | 1.78   |   |
| 7855 | RGD1562550     | -1.11 | 9   | 1.46   | 13  | 1.31   |   |
| 7856 | Rhou           | -1.11 | 28  | 11.79  | 37  | 10.57  |   |
| 7857 | Ryr3           | -1.11 | 16  | 0.12   | 18  | 0.11   |   |
| 7858 | Scand1         | -1.11 | 33  | 11.82  | 35  | 10.6   |   |
| 7859 | Sfxn4          | -1.11 | 24  | 1.37   | 32  | 1.23   |   |
| 7860 | Smim11         | -1.11 | 24  | 10.88  | 55  | 9.76   |   |
| 7861 | Snx30          | -1.11 | 54  | 3.42   | 47  | 3.07   |   |
| 7862 | Syt5           | -1.11 | 7   | 0.99   | 8   | 0.89   |   |
| 7863 | Tmem194        | -1.11 | 3   | 1.52   | 6   | 1.36   |   |
| 7864 | Tmem200a_1     | -1.11 | 66  | 6.64   | 83  | 5.96   |   |
| 7865 | Tmem218        | -1.11 | 15  | 2.83   | 13  | 2.54   |   |
| 7866 | Tnfaip2        | -1.11 | 11  | 0.95   | 18  | 0.86   |   |
| 7867 | Wnk4           | -1.11 | 1   | 0.43   | 1   | 0.38   |   |
| 7868 | Zbtb25         | -1.11 | 59  | 3.38   | 78  | 3.03   |   |
| 7869 | Kars           | -1.12 | 285 | 45.81  | 350 | 41.07  |   |
| 7870 | Cct2           | -1.12 | 684 | 120.69 | 817 | 108.17 |   |
| 7871 | Mast4_2        | -1.12 | 163 | 35.62  | 202 | 31.92  |   |

Supplemental Table 3  
 FSH + Ad-E versus FSH + Ad-FOXO1(A3), 24 hours

|      | A              | B     | C   | D      | E    | F      | G |
|------|----------------|-------|-----|--------|------|--------|---|
| 7872 | Ncdn           | -1.12 | 151 | 14.04  | 183  | 12.59  |   |
| 7873 | Phf5a          | -1.12 | 132 | 50.18  | 158  | 44.96  |   |
| 7874 | Polr2b         | -1.12 | 252 | 22.82  | 318  | 20.45  |   |
| 7875 | Hspbp1         | -1.12 | 125 | 26.65  | 150  | 23.87  |   |
| 7876 | LOC103689945   | -1.12 | 20  | 24.27  | 30   | 21.74  |   |
| 7877 | Slc9a8         | -1.12 | 195 | 13.65  | 249  | 12.22  |   |
| 7878 | LOC100361515   | -1.12 | 159 | 19.76  | 194  | 17.69  |   |
| 7879 | Mt-nd3         | -1.12 | 605 | 632.58 | 719  | 566.27 |   |
| 7880 | Fam214a        | -1.12 | 484 | 24.23  | 675  | 21.69  |   |
| 7881 | AABR07015165.1 | -1.12 | 121 | 12.96  | 141  | 11.59  |   |
| 7882 | Vps41          | -1.12 | 273 | 30.03  | 337  | 26.86  |   |
| 7883 | RT1-CE5        | -1.12 | 14  | 10.98  | 18   | 9.82   |   |
| 7884 | Nono           | -1.12 | 968 | 111.61 | 1156 | 99.84  |   |
| 7885 | Kif13a         | -1.12 | 528 | 17.26  | 648  | 15.44  |   |
| 7886 | Colgalt1       | -1.12 | 373 | 44.72  | 445  | 39.99  |   |
| 7887 | Fcgrt          | -1.12 | 164 | 36.91  | 212  | 33.01  |   |
| 7888 | Asb7           | -1.12 | 115 | 7.25   | 155  | 6.48   |   |
| 7889 | Tshz2          | -1.12 | 51  | 6.05   | 61   | 5.41   |   |
| 7890 | Spg20          | -1.12 | 144 | 12.06  | 197  | 10.78  |   |
| 7891 | Crtc3          | -1.12 | 360 | 10.28  | 509  | 9.19   |   |
| 7892 | Mical3         | -1.12 | 250 | 9.78   | 318  | 8.74   |   |
| 7893 | Ubac2          | -1.12 | 151 | 21.5   | 199  | 19.21  |   |
| 7894 | Foxj2          | -1.12 | 211 | 13.96  | 257  | 12.47  |   |
| 7895 | Ctsd           | -1.12 | 667 | 118.54 | 803  | 105.89 |   |
| 7896 | 5_8S_rRNA_2    | -1.12 | 0   | 1178.5 | 0    | 1052.7 |   |
| 7897 | Farsa          | -1.12 | 174 | 30.09  | 206  | 26.87  |   |
| 7898 | Fam189b        | -1.12 | 70  | 8.54   | 81   | 7.63   |   |
| 7899 | LOC499331      | -1.12 | 36  | 7.78   | 49   | 6.95   |   |
| 7900 | Ip6k2          | -1.12 | 344 | 19.96  | 428  | 17.82  |   |
| 7901 | Nme2           | -1.12 | 178 | 82.51  | 216  | 73.66  |   |
| 7902 | Pak3           | -1.12 | 87  | 10.74  | 107  | 9.59   |   |
| 7903 | Ap2s1          | -1.12 | 113 | 38.86  | 136  | 34.69  |   |
| 7904 | Palm           | -1.12 | 119 | 23.05  | 278  | 20.57  |   |
| 7905 | Gpr173         | -1.12 | 44  | 2.73   | 55   | 2.43   |   |
| 7906 | Slc12a9        | -1.12 | 36  | 3.43   | 46   | 3.06   |   |
| 7907 | Vegfb          | -1.12 | 39  | 6.28   | 50   | 5.61   |   |
| 7908 | Cpox           | -1.12 | 69  | 8.16   | 77   | 7.28   |   |
| 7909 | Gltscr2        | -1.12 | 221 | 45.02  | 279  | 40.17  |   |
| 7910 | Cops4          | -1.12 | 291 | 46.83  | 379  | 41.78  |   |
| 7911 | Oaz2           | -1.12 | 166 | 72.8   | 226  | 64.93  |   |
| 7912 | Atp5g3         | -1.12 | 312 | 155.1  | 377  | 138.33 |   |
| 7913 | Fbxw5          | -1.12 | 188 | 25.92  | 206  | 23.11  |   |
| 7914 | Scmh1          | -1.12 | 123 | 11.82  | 167  | 10.54  |   |
| 7915 | Mrpl39         | -1.12 | 43  | 9.31   | 50   | 8.3    |   |
| 7916 | Ankrd13b       | -1.12 | 34  | 4.48   | 61   | 3.99   |   |
| 7917 | RGD1562161     | -1.12 | 104 | 7.01   | 134  | 6.25   |   |
| 7918 | Siah2          | -1.12 | 36  | 4.64   | 40   | 4.13   |   |
| 7919 | Slc7a6os       | -1.12 | 60  | 12.59  | 72   | 11.23  |   |
| 7920 | Ube2q2         | -1.12 | 46  | 8.32   | 62   | 7.42   |   |
| 7921 | Msto1          | -1.12 | 33  | 8.63   | 42   | 7.69   |   |
| 7922 | Naa20          | -1.12 | 103 | 13.03  | 165  | 11.61  |   |
| 7923 | Sf3a2          | -1.12 | 112 | 21.18  | 123  | 18.87  |   |
| 7924 | Prdx6          | -1.12 | 147 | 64.73  | 174  | 57.65  |   |
| 7925 | Ccndbp1        | -1.12 | 78  | 15.47  | 97   | 13.77  |   |

Supplemental Table 3  
 FSH + Ad-E versus FSH + Ad-FOXO1(A3), 24 hours

|      | A              | B     | C    | D       | E    | F      | G |
|------|----------------|-------|------|---------|------|--------|---|
| 7926 | Vapb           | -1.12 | 93   | 24.92   | 121  | 22.19  |   |
| 7927 | Lrp10          | -1.12 | 400  | 48.88   | 480  | 43.52  |   |
| 7928 | Nlk            | -1.12 | 236  | 9.99    | 299  | 8.9    |   |
| 7929 | Gpr137         | -1.12 | 26   | 4.6     | 28   | 4.09   |   |
| 7930 | Mrpl46         | -1.12 | 29   | 4.8     | 33   | 4.27   |   |
| 7931 | Rabl3          | -1.12 | 26   | 3.88    | 32   | 3.45   |   |
| 7932 | Rcc1           | -1.12 | 52   | 6.19    | 68   | 5.51   |   |
| 7933 | RGD1306271     | -1.12 | 133  | 4.26    | 162  | 3.79   |   |
| 7934 | Cox17          | -1.12 | 26   | 18.02   | 44   | 16.04  |   |
| 7935 | Men1           | -1.12 | 207  | 24.92   | 254  | 22.18  |   |
| 7936 | Bud31          | -1.12 | 102  | 32.21   | 120  | 28.66  |   |
| 7937 | Mt-cytb        | -1.12 | 8112 | 2594.98 | 9717 | 2308.6 |   |
| 7938 | Dzip3          | -1.12 | 82   | 4.72    | 114  | 4.2    |   |
| 7939 | Kctd2          | -1.12 | 81   | 12.84   | 103  | 11.42  |   |
| 7940 | Tmem159        | -1.12 | 205  | 37.4    | 301  | 33.27  |   |
| 7941 | LOC100909476   | -1.12 | 181  | 31.84   | 218  | 28.32  |   |
| 7942 | Ubxn6          | -1.12 | 112  | 16.22   | 133  | 14.43  |   |
| 7943 | Plk4           | -1.12 | 41   | 3.87    | 49   | 3.44   |   |
| 7944 | Rab43          | -1.12 | 54   | 13.95   | 77   | 12.41  |   |
| 7945 | Zfp202         | -1.12 | 69   | 3.68    | 105  | 3.27   |   |
| 7946 | Orc4           | -1.12 | 86   | 8.14    | 108  | 7.24   |   |
| 7947 | LOC361346      | -1.13 | 125  | 9.58    | 158  | 8.52   |   |
| 7948 | Bet1l          | -1.13 | 91   | 23.61   | 113  | 20.99  |   |
| 7949 | Itipr12        | -1.13 | 53   | 10.12   | 63   | 8.99   |   |
| 7950 | Eepd1          | -1.13 | 89   | 8.5     | 123  | 7.55   |   |
| 7951 | Smpd1          | -1.13 | 350  | 54.88   | 417  | 48.77  |   |
| 7952 | Armc5          | -1.13 | 136  | 13.54   | 156  | 12.03  |   |
| 7953 | Khsrp          | -1.13 | 312  | 32.62   | 360  | 28.99  |   |
| 7954 | Gtf2a1         | -1.13 | 308  | 18.66   | 359  | 16.57  |   |
| 7955 | Lpin3          | -1.13 | 144  | 11.69   | 164  | 10.38  |   |
| 7956 | AABR07015066.1 | -1.13 | 0    | 14.1    | 0    | 12.51  |   |
| 7957 | AABR07050438.1 | -1.13 | 106  | 1.79    | 135  | 1.59   |   |
| 7958 | Arl6ip4        | -1.13 | 50   | 14.64   | 60   | 13     |   |
| 7959 | Fam162a        | -1.13 | 77   | 7.44    | 79   | 6.6    |   |
| 7960 | Frs3           | -1.13 | 24   | 2.87    | 33   | 2.55   |   |
| 7961 | Ghdc           | -1.13 | 18   | 2.69    | 20   | 2.39   |   |
| 7962 | LOC500331      | -1.13 | 78   | 2.4     | 98   | 2.13   |   |
| 7963 | Mpdu1          | -1.13 | 43   | 22.68   | 50   | 20.14  |   |
| 7964 | Mrpl48         | -1.13 | 95   | 13.49   | 121  | 11.98  |   |
| 7965 | Nop56          | -1.13 | 145  | 24.32   | 193  | 21.59  |   |
| 7966 | Rbm39          | -1.13 | 1    | 2.93    | 1    | 2.6    |   |
| 7967 | Spryd3         | -1.13 | 57   | 7.2     | 71   | 6.39   |   |
| 7968 | Elk1           | -1.13 | 158  | 19.19   | 179  | 17.03  |   |
| 7969 | Zmat2          | -1.13 | 108  | 19.83   | 128  | 17.59  |   |
| 7970 | Srsf4          | -1.13 | 183  | 14.94   | 262  | 13.26  |   |
| 7971 | Anapc1         | -1.13 | 378  | 14.17   | 456  | 12.57  |   |
| 7972 | RGD1305350     | -1.13 | 250  | 32      | 290  | 28.39  |   |
| 7973 | Tmem59         | -1.13 | 597  | 131.37  | 738  | 116.56 |   |
| 7974 | Chrac1         | -1.13 | 81   | 32.52   | 91   | 28.85  |   |
| 7975 | Drg1           | -1.13 | 134  | 26.59   | 177  | 23.58  |   |
| 7976 | Kcne4          | -1.13 | 59   | 33.96   | 70   | 30.12  |   |
| 7977 | Hmgcs1         | -1.13 | 616  | 67.02   | 751  | 59.43  |   |
| 7978 | Rnasel         | -1.13 | 44   | 3.25    | 56   | 2.88   |   |
| 7979 | Sulf1          | -1.13 | 104  | 5.8     | 129  | 5.15   |   |

Supplemental Table 3  
 FSH + Ad-E versus FSH + Ad-FOXO1(A3), 24 hours

|      | A              | B     | C   | D      | E    | F      | G |
|------|----------------|-------|-----|--------|------|--------|---|
| 7980 | AABR07041096.1 | -1.13 | 113 | 9.49   | 136  | 8.41   |   |
| 7981 | Acadvl         | -1.13 | 140 | 20.61  | 163  | 18.27  |   |
| 7982 | Exoc3          | -1.13 | 121 | 15.58  | 146  | 13.8   |   |
| 7983 | Mkln1          | -1.13 | 189 | 17.76  | 217  | 15.74  |   |
| 7984 | Nudt4          | -1.13 | 152 | 16.71  | 178  | 14.8   |   |
| 7985 | Slc10a7        | -1.13 | 163 | 7.54   | 191  | 6.68   |   |
| 7986 | Ugcg           | -1.13 | 57  | 7.82   | 68   | 6.93   |   |
| 7987 | Zxdc           | -1.13 | 118 | 11.42  | 163  | 10.12  |   |
| 7988 | Slc38a7        | -1.13 | 138 | 10.33  | 165  | 9.15   |   |
| 7989 | Spg7           | -1.13 | 225 | 16.11  | 281  | 14.28  |   |
| 7990 | Cd151          | -1.13 | 5   | 21.26  | 5    | 18.83  |   |
| 7991 | Gbe1           | -1.13 | 108 | 11.56  | 145  | 10.24  |   |
| 7992 | Tgif2          | -1.13 | 77  | 11.56  | 95   | 10.24  |   |
| 7993 | Tbc1d9         | -1.13 | 174 | 8.06   | 204  | 7.14   |   |
| 7994 | Med13l         | -1.13 | 993 | 33.22  | 1214 | 29.42  |   |
| 7995 | Poglut1        | -1.13 | 193 | 18.64  | 234  | 16.51  |   |
| 7996 | Adck4          | -1.13 | 72  | 6.56   | 92   | 5.81   |   |
| 7997 | Atg16l1        | -1.13 | 164 | 12.49  | 214  | 11.06  |   |
| 7998 | Ndc1           | -1.13 | 92  | 5.71   | 103  | 5.06   |   |
| 7999 | Tubgcp6        | -1.13 | 107 | 6.41   | 129  | 5.67   |   |
| 8000 | Fech           | -1.13 | 106 | 9.28   | 127  | 8.22   |   |
| 8001 | Trappc6b       | -1.13 | 50  | 11.62  | 73   | 10.29  |   |
| 8002 | Zbtb4          | -1.13 | 76  | 8.52   | 91   | 7.55   |   |
| 8003 | Lrrc47         | -1.13 | 190 | 20.4   | 231  | 18.06  |   |
| 8004 | Txndc12        | -1.13 | 212 | 40.12  | 279  | 35.52  |   |
| 8005 | Pfn1           | -1.13 | 566 | 238.72 | 676  | 211.31 |   |
| 8006 | U2af2          | -1.13 | 316 | 47.38  | 359  | 41.94  |   |
| 8007 | Ctc1           | -1.13 | 449 | 34.82  | 535  | 30.82  |   |
| 8008 | Map3k10        | -1.13 | 77  | 5.02   | 87   | 4.44   |   |
| 8009 | Rn60_1_2787.1  | -1.13 | 33  | 4.33   | 34   | 3.83   |   |
| 8010 | Rnaseh2a       | -1.13 | 116 | 21.47  | 154  | 19     |   |
| 8011 | Pigt           | -1.13 | 554 | 83.51  | 670  | 73.89  |   |
| 8012 | Ucp2           | -1.13 | 806 | 179.91 | 980  | 159.16 |   |
| 8013 | Arhgef17       | -1.13 | 443 | 23.7   | 525  | 20.97  |   |
| 8014 | Tmed2          | -1.13 | 702 | 129.26 | 837  | 114.33 |   |
| 8015 | Uqcrfs1        | -1.13 | 216 | 71.08  | 255  | 62.87  |   |
| 8016 | Brf1           | -1.13 | 141 | 10.8   | 162  | 9.55   |   |
| 8017 | Nr1h2          | -1.13 | 240 | 40.23  | 280  | 35.58  |   |
| 8018 | Fbxl17         | -1.13 | 238 | 15.76  | 296  | 13.94  |   |
| 8019 | Ptp4a1         | -1.13 | 10  | 32.29  | 14   | 28.55  |   |
| 8020 | Psma5          | -1.13 | 145 | 45.21  | 170  | 39.97  |   |
| 8021 | Emc10          | -1.13 | 166 | 35.43  | 200  | 31.32  |   |
| 8022 | Raet1d         | -1.13 | 11  | 4.43   | 13   | 3.91   |   |
| 8023 | Smap2          | -1.13 | 87  | 9.16   | 111  | 8.1    |   |
| 8024 | AABR07062513.1 | -1.13 | 42  | 1.94   | 60   | 1.71   |   |
| 8025 | Ankrd16        | -1.13 | 25  | 1.95   | 46   | 1.73   |   |
| 8026 | Ccdc8          | -1.13 | 239 | 26.56  | 286  | 23.47  |   |
| 8027 | Dok4           | -1.13 | 32  | 5.23   | 39   | 4.62   |   |
| 8028 | Dtd2           | -1.13 | 26  | 6.11   | 29   | 5.4    |   |
| 8029 | Fbrsl1         | -1.13 | 103 | 6.48   | 101  | 5.73   |   |
| 8030 | Jrk            | -1.13 | 33  | 5.01   | 40   | 4.42   |   |
| 8031 | LOC497934      | -1.13 | 29  | 6.44   | 33   | 5.69   |   |
| 8032 | Mcm8           | -1.13 | 15  | 1.23   | 16   | 1.09   |   |
| 8033 | Mphosph6       | -1.13 | 28  | 7.5    | 40   | 6.63   |   |

Supplemental Table 3  
 FSH + Ad-E versus FSH + Ad-FOXO1(A3), 24 hours

|      | A          | B     | C   | D     | E   | F     | G |
|------|------------|-------|-----|-------|-----|-------|---|
| 8034 | Mthfd2l    | -1.13 | 60  | 1.35  | 57  | 1.19  |   |
| 8035 | Pgm2       | -1.13 | 50  | 7.56  | 73  | 6.68  |   |
| 8036 | Rab21      | -1.13 | 64  | 13.43 | 85  | 11.86 |   |
| 8037 | Slc7a2     | -1.13 | 18  | 1.51  | 18  | 1.33  |   |
| 8038 | Snta1      | -1.13 | 33  | 3.8   | 42  | 3.36  |   |
| 8039 | Uprt       | -1.13 | 13  | 3.11  | 16  | 2.74  |   |
| 8040 | Zdhhc3     | -1.13 | 210 | 15.69 | 281 | 13.86 |   |
| 8041 | Zfp354a    | -1.13 | 21  | 2.84  | 29  | 2.51  |   |
| 8042 | Ikbbk      | -1.13 | 130 | 9.59  | 182 | 8.47  |   |
| 8043 | Cmas       | -1.13 | 109 | 20.13 | 132 | 17.77 |   |
| 8044 | Fkrp       | -1.13 | 66  | 9.21  | 82  | 8.12  |   |
| 8045 | Puf60      | -1.13 | 383 | 67.47 | 471 | 59.55 |   |
| 8046 | Fam49b     | -1.13 | 334 | 54.29 | 423 | 47.9  |   |
| 8047 | Aspm       | -1.13 | 50  | 1.86  | 60  | 1.64  |   |
| 8048 | Lss        | -1.13 | 227 | 20.05 | 260 | 17.69 |   |
| 8049 | Alkbh3     | -1.13 | 84  | 11.21 | 129 | 9.88  |   |
| 8050 | Mrps22     | -1.13 | 66  | 11.4  | 96  | 10.05 |   |
| 8051 | Sh3tc1     | -1.13 | 76  | 5.16  | 94  | 4.55  |   |
| 8052 | Spg21      | -1.13 | 143 | 28.97 | 193 | 25.53 |   |
| 8053 | Fut10      | -1.13 | 77  | 6.26  | 94  | 5.52  |   |
| 8054 | Syngap1    | -1.13 | 102 | 4.76  | 109 | 4.2   |   |
| 8055 | Amigo1     | -1.13 | 56  | 4.37  | 66  | 3.85  |   |
| 8056 | Dhrs4      | -1.13 | 48  | 7.39  | 47  | 6.52  |   |
| 8057 | Dph3       | -1.13 | 59  | 6.25  | 65  | 5.51  |   |
| 8058 | Gpm6a      | -1.13 | 33  | 3.4   | 39  | 3     |   |
| 8059 | Mapre3     | -1.13 | 37  | 5.61  | 48  | 4.94  |   |
| 8060 | Ubl4a      | -1.13 | 85  | 13.04 | 100 | 11.49 |   |
| 8061 | Aasdh      | -1.13 | 55  | 3.07  | 57  | 2.71  |   |
| 8062 | lqce       | -1.13 | 63  | 4.21  | 81  | 3.71  |   |
| 8063 | Ncapd2     | -1.13 | 128 | 9.72  | 168 | 8.57  |   |
| 8064 | Psm12      | -1.13 | 184 | 30.91 | 234 | 27.23 |   |
| 8065 | Gdpd5      | -1.14 | 113 | 10.87 | 140 | 9.58  |   |
| 8066 | Rrm1       | -1.14 | 205 | 24.3  | 248 | 21.4  |   |
| 8067 | Mbd5       | -1.14 | 134 | 5.55  | 175 | 4.89  |   |
| 8068 | Stt3b      | -1.14 | 761 | 44.39 | 941 | 39.09 |   |
| 8069 | Ankrd13a   | -1.14 | 408 | 39.7  | 502 | 34.96 |   |
| 8070 | Abcb10     | -1.14 | 63  | 4.74  | 77  | 4.18  |   |
| 8071 | RGD1565685 | -1.14 | 76  | 12.52 | 101 | 11.03 |   |
| 8072 | Dhx33      | -1.14 | 47  | 6     | 61  | 5.28  |   |
| 8073 | Eif3k      | -1.14 | 229 | 67.91 | 273 | 59.79 |   |
| 8074 | Zfp184     | -1.14 | 176 | 5.45  | 258 | 4.8   |   |
| 8075 | Tpd52l2    | -1.14 | 141 | 16.3  | 159 | 14.35 |   |
| 8076 | Pomk       | -1.14 | 381 | 40.51 | 448 | 35.65 |   |
| 8077 | Aamp       | -1.14 | 280 | 36.03 | 328 | 31.71 |   |
| 8078 | Elp3       | -1.14 | 385 | 37.78 | 481 | 33.25 |   |
| 8079 | Slc44a1    | -1.14 | 600 | 29.7  | 699 | 26.13 |   |
| 8080 | Cant1      | -1.14 | 169 | 22.24 | 200 | 19.57 |   |
| 8081 | Aplp1      | -1.14 | 451 | 70.04 | 541 | 61.61 |   |
| 8082 | D2hgdh     | -1.14 | 19  | 1.7   | 29  | 1.5   |   |
| 8083 | Mgat3      | -1.14 | 17  | 2.3   | 23  | 2.02  |   |
| 8084 | Trappc10   | -1.14 | 300 | 13.99 | 367 | 12.3  |   |
| 8085 | Yrdc       | -1.14 | 74  | 14.66 | 96  | 12.89 |   |
| 8086 | Dtnb       | -1.14 | 92  | 5.32  | 135 | 4.68  |   |
| 8087 | Elac1      | -1.14 | 52  | 4.34  | 66  | 3.82  |   |

Supplemental Table 3  
 FSH + Ad-E versus FSH + Ad-FOXO1(A3), 24 hours

|      | A              | B     | C    | D       | E    | F      | G |
|------|----------------|-------|------|---------|------|--------|---|
| 8088 | Lactb          | -1.14 | 37   | 2.96    | 42   | 2.6    |   |
| 8089 | Lin9           | -1.14 | 20   | 3.67    | 29   | 3.23   |   |
| 8090 | Nup62          | -1.14 | 200  | 26.04   | 231  | 22.9   |   |
| 8091 | Psd            | -1.14 | 20   | 1.54    | 23   | 1.35   |   |
| 8092 | RGD1310429     | -1.14 | 29   | 5.22    | 38   | 4.59   |   |
| 8093 | Runx2          | -1.14 | 61   | 1.09    | 67   | 0.96   |   |
| 8094 | Senp7          | -1.14 | 167  | 7.57    | 239  | 6.66   |   |
| 8095 | Zfp174         | -1.14 | 19   | 2.02    | 21   | 1.78   |   |
| 8096 | Sdc4           | -1.14 | 219  | 31.43   | 262  | 27.63  |   |
| 8097 | Fbxo22         | -1.14 | 69   | 17.98   | 96   | 15.81  |   |
| 8098 | Pi4ka          | -1.14 | 312  | 14.07   | 381  | 12.37  |   |
| 8099 | Ifngr2         | -1.14 | 84   | 10.27   | 95   | 9.02   |   |
| 8100 | Tmem260        | -1.14 | 221  | 9.21    | 303  | 8.1    |   |
| 8101 | Mt-nd1         | -1.14 | 2971 | 1142.32 | 3523 | 1004   |   |
| 8102 | Commd1         | -1.14 | 126  | 12.2    | 187  | 10.72  |   |
| 8103 | Map3k11        | -1.14 | 132  | 12.38   | 153  | 10.88  |   |
| 8104 | Pdlim2         | -1.14 | 43   | 9.48    | 48   | 8.33   |   |
| 8105 | Ptprg          | -1.14 | 134  | 7.03    | 164  | 6.18   |   |
| 8106 | Anxa11         | -1.14 | 393  | 55.35   | 468  | 48.62  |   |
| 8107 | Dhx30          | -1.14 | 339  | 26.42   | 400  | 23.2   |   |
| 8108 | Maoa           | -1.14 | 121  | 17.9    | 146  | 15.72  |   |
| 8109 | Ankrd10        | -1.14 | 373  | 29.88   | 499  | 26.24  |   |
| 8110 | Pknox1         | -1.14 | 70   | 5.34    | 89   | 4.69   |   |
| 8111 | Galnt2         | -1.14 | 801  | 68.43   | 957  | 60.09  |   |
| 8112 | Dstyk          | -1.14 | 147  | 7.82    | 192  | 6.86   |   |
| 8113 | Rxb            | -1.14 | 139  | 11.35   | 163  | 9.97   |   |
| 8114 | Cct3           | -1.14 | 516  | 88.75   | 589  | 77.9   |   |
| 8115 | Apex2          | -1.14 | 33   | 4.51    | 34   | 3.96   |   |
| 8116 | Romo1          | -1.14 | 17   | 20.61   | 22   | 18.09  |   |
| 8117 | Sh3gl1         | -1.14 | 249  | 37.46   | 295  | 32.87  |   |
| 8118 | Cep78          | -1.14 | 31   | 3.42    | 39   | 3      |   |
| 8119 | Mrpl4          | -1.14 | 100  | 21.22   | 116  | 18.62  |   |
| 8120 | Nkap           | -1.14 | 30   | 6.67    | 36   | 5.86   |   |
| 8121 | Phykpl         | -1.14 | 0    | 1.77    | 0    | 1.56   |   |
| 8122 | Pkd1           | -1.14 | 827  | 20.52   | 967  | 18.01  |   |
| 8123 | Hspa9          | -1.14 | 330  | 59.66   | 395  | 52.34  |   |
| 8124 | Actr1b         | -1.14 | 319  | 29.48   | 370  | 25.85  |   |
| 8125 | Psmb5          | -1.14 | 194  | 86.27   | 244  | 75.66  |   |
| 8126 | Maged2         | -1.14 | 118  | 53.84   | 146  | 47.22  |   |
| 8127 | Gtf2i          | -1.14 | 1175 | 80.28   | 1396 | 70.4   |   |
| 8128 | Vps72          | -1.14 | 187  | 43.26   | 239  | 37.93  |   |
| 8129 | Ap1s2          | -1.14 | 64   | 4.79    | 82   | 4.2    |   |
| 8130 | Lrrc57         | -1.14 | 24   | 5.79    | 34   | 5.08   |   |
| 8131 | AABR07027910.1 | -1.14 | 29   | 5.51    | 34   | 4.83   |   |
| 8132 | Dnase1l1       | -1.14 | 69   | 13.14   | 87   | 11.52  |   |
| 8133 | Nsmce1         | -1.14 | 69   | 12.43   | 75   | 10.89  |   |
| 8134 | Ptcd1          | -1.14 | 67   | 6.8     | 88   | 5.96   |   |
| 8135 | Cox7a2l        | -1.14 | 229  | 61.27   | 282  | 53.7   |   |
| 8136 | Eif2b5         | -1.14 | 215  | 24.3    | 269  | 21.3   |   |
| 8137 | Preli1         | -1.14 | 111  | 63.79   | 174  | 55.89  |   |
| 8138 | Fam114a1       | -1.14 | 73   | 13.6    | 119  | 11.91  |   |
| 8139 | Smo            | -1.14 | 353  | 34.35   | 419  | 30.09  |   |
| 8140 | Ifi27          | -1.14 | 485  | 211.43  | 580  | 185.21 |   |
| 8141 | Rbbp4          | -1.14 | 117  | 65.13   | 154  | 57.05  |   |

Supplemental Table 3  
 FSH + Ad-E versus FSH + Ad-FOXO1(A3), 24 hours

|      | A              | B     | C    | D      | E    | F      | G |
|------|----------------|-------|------|--------|------|--------|---|
| 8142 | Tenm3          | -1.14 | 347  | 14.93  | 427  | 13.08  |   |
| 8143 | Usp9x          | -1.14 | 1183 | 32.78  | 1460 | 28.71  |   |
| 8144 | Gtf2e1         | -1.14 | 77   | 9.56   | 92   | 8.37   |   |
| 8145 | Rbm4b_2        | -1.14 | 102  | 26.23  | 118  | 22.96  |   |
| 8146 | Bbs1           | -1.14 | 43   | 3.56   | 48   | 3.12   |   |
| 8147 | RGD1561277     | -1.14 | 52   | 3.04   | 57   | 2.66   |   |
| 8148 | Nit1           | -1.14 | 117  | 23.07  | 125  | 20.19  |   |
| 8149 | RGD735029      | -1.14 | 97   | 13.26  | 116  | 11.61  |   |
| 8150 | Ndst1          | -1.14 | 322  | 27.83  | 389  | 24.35  |   |
| 8151 | lpo4           | -1.14 | 240  | 21.72  | 269  | 19.01  |   |
| 8152 | Eif1b          | -1.14 | 49   | 18.46  | 61   | 16.15  |   |
| 8153 | Alkbh1         | -1.14 | 126  | 8.81   | 150  | 7.7    |   |
| 8154 | LOC361635      | -1.14 | 335  | 33.65  | 422  | 29.43  |   |
| 8155 | Unc45a         | -1.14 | 220  | 21.93  | 247  | 19.18  |   |
| 8156 | Eif4ebp2       | -1.14 | 232  | 42.65  | 282  | 37.3   |   |
| 8157 | Spen           | -1.14 | 331  | 9.4    | 401  | 8.22   |   |
| 8158 | Lonp1          | -1.14 | 227  | 25.98  | 263  | 22.72  |   |
| 8159 | Dync2h1        | -1.14 | 165  | 4.63   | 199  | 4.05   |   |
| 8160 | AABR07073038.1 | -1.14 | 341  | 115.94 | 402  | 101.38 |   |
| 8161 | Il10rb         | -1.14 | 77   | 11.83  | 85   | 10.35  |   |
| 8162 | Amz2           | -1.14 | 137  | 14.54  | 169  | 12.71  |   |
| 8163 | Smchd1         | -1.14 | 234  | 11     | 289  | 9.62   |   |
| 8164 | Samd8          | -1.14 | 365  | 18.35  | 448  | 16.04  |   |
| 8165 | Riok1          | -1.14 | 80   | 8.54   | 97   | 7.46   |   |
| 8166 | Uck1           | -1.14 | 141  | 24.49  | 174  | 21.41  |   |
| 8167 | Calu           | -1.14 | 1283 | 131.87 | 1523 | 115.26 |   |
| 8168 | Sdc1           | -1.14 | 304  | 35.65  | 360  | 31.16  |   |
| 8169 | Ndufb10        | -1.14 | 78   | 40.82  | 94   | 35.67  |   |
| 8170 | Zbtb17         | -1.14 | 124  | 12.42  | 142  | 10.85  |   |
| 8171 | Rbck1          | -1.15 | 254  | 32.38  | 311  | 28.28  |   |
| 8172 | Med12l         | -1.15 | 170  | 3.99   | 212  | 3.49   |   |
| 8173 | Fam3a          | -1.15 | 161  | 24.04  | 214  | 20.99  |   |
| 8174 | Ccdc28a        | -1.15 | 33   | 5.45   | 32   | 4.76   |   |
| 8175 | Fancg          | -1.15 | 9    | 1.16   | 9    | 1.01   |   |
| 8176 | RGD1562953     | -1.15 | 1    | 2.67   | 2    | 2.33   |   |
| 8177 | Tbcel          | -1.15 | 173  | 12.24  | 231  | 10.68  |   |
| 8178 | AABR07027581.1 | -1.15 | 225  | 7.99   | 325  | 6.97   |   |
| 8179 | AABR07069473.1 | -1.15 | 14   | 1.44   | 26   | 1.26   |   |
| 8180 | Acad11         | -1.15 | 136  | 10.43  | 174  | 9.1    |   |
| 8181 | Alpl           | -1.15 | 9    | 0.89   | 10   | 0.78   |   |
| 8182 | Ankrd53        | -1.15 | 32   | 1.13   | 54   | 0.98   |   |
| 8183 | Apoa1bp        | -1.15 | 68   | 23.66  | 82   | 20.64  |   |
| 8184 | BC024978       | -1.15 | 23   | 3.81   | 22   | 3.32   |   |
| 8185 | Cbwd1          | -1.15 | 35   | 2.97   | 51   | 2.59   |   |
| 8186 | Ccdc101        | -1.15 | 58   | 10.86  | 73   | 9.47   |   |
| 8187 | Ccdc163        | -1.15 | 14   | 1.37   | 14   | 1.19   |   |
| 8188 | Cep19          | -1.15 | 36   | 7.03   | 42   | 6.13   |   |
| 8189 | Ciz1           | -1.15 | 197  | 11.61  | 240  | 10.12  |   |
| 8190 | Dlk1           | -1.15 | 5    | 1.35   | 8    | 1.18   |   |
| 8191 | Dnajc17        | -1.15 | 25   | 2.19   | 35   | 1.91   |   |
| 8192 | Dsn1           | -1.15 | 76   | 6.05   | 95   | 5.28   |   |
| 8193 | Filip1         | -1.15 | 13   | 0.34   | 12   | 0.3    |   |
| 8194 | Frmppd1        | -1.15 | 6    | 0.49   | 8    | 0.43   |   |
| 8195 | Galnt16_2      | -1.15 | 5    | 1.66   | 5    | 1.45   |   |



Supplemental Table 3  
 FSH + Ad-E versus FSH + Ad-FOXO1(A3), 24 hours

|      | A              | B     | C    | D      | E    | F      | G |
|------|----------------|-------|------|--------|------|--------|---|
| 8196 | Hiat1_2        | -1.15 | 0    | 1.17   | 0    | 1.02   |   |
| 8197 | Impa2          | -1.15 | 8    | 1.24   | 12   | 1.08   |   |
| 8198 | Irf5           | -1.15 | 11   | 0.92   | 19   | 0.81   |   |
| 8199 | Keap1          | -1.15 | 108  | 9.62   | 127  | 8.39   |   |
| 8200 | Krt8           | -1.15 | 18   | 3.78   | 22   | 3.3    |   |
| 8201 | LOC100125367   | -1.15 | 10   | 2.21   | 13   | 1.93   |   |
| 8202 | LOC100911881   | -1.15 | 0    | 4.33   | 0    | 3.78   |   |
| 8203 | LOC100912429   | -1.15 | 0    | 5.32   | 0    | 4.64   |   |
| 8204 | Lpcat1         | -1.15 | 73   | 6.02   | 97   | 5.25   |   |
| 8205 | Mcm6           | -1.15 | 200  | 23.83  | 230  | 20.79  |   |
| 8206 | mrpl11         | -1.15 | 29   | 10.55  | 34   | 9.2    |   |
| 8207 | Msh3           | -1.15 | 95   | 5.1    | 124  | 4.45   |   |
| 8208 | Napb           | -1.15 | 17   | 1.85   | 32   | 1.61   |   |
| 8209 | Nif31          | -1.15 | 67   | 6.31   | 100  | 5.5    |   |
| 8210 | Nipal3         | -1.15 | 22   | 2.98   | 19   | 2.6    |   |
| 8211 | Nkd2           | -1.15 | 6    | 0.54   | 9    | 0.47   |   |
| 8212 | Nme7           | -1.15 | 63   | 9.35   | 65   | 8.16   |   |
| 8213 | Nup107         | -1.15 | 70   | 6.32   | 80   | 5.51   |   |
| 8214 | Parp10         | -1.15 | 67   | 6.82   | 81   | 5.95   |   |
| 8215 | Rab3il1        | -1.15 | 7    | 1.92   | 10   | 1.68   |   |
| 8216 | Rcbtb1         | -1.15 | 137  | 7.38   | 216  | 6.44   |   |
| 8217 | S100a13        | -1.15 | 10   | 4.49   | 21   | 3.91   |   |
| 8218 | Selm           | -1.15 | 9    | 3.22   | 7    | 2.81   |   |
| 8219 | Serf1          | -1.15 | 10   | 4.73   | 12   | 4.13   |   |
| 8220 | Spag8          | -1.15 | 8    | 1.21   | 8    | 1.06   |   |
| 8221 | Twist1         | -1.15 | 24   | 5.4    | 29   | 4.71   |   |
| 8222 | Usp2           | -1.15 | 7    | 0.85   | 8    | 0.74   |   |
| 8223 | Zswim5         | -1.15 | 55   | 3.5    | 76   | 3.05   |   |
| 8224 | AABR07050407.1 | -1.15 | 1    | 1.2    | 2    | 1.05   |   |
| 8225 | Cd109          | -1.15 | 7    | 0.41   | 9    | 0.36   |   |
| 8226 | Gal3st4        | -1.15 | 8    | 0.98   | 9    | 0.86   |   |
| 8227 | Glrx           | -1.15 | 13   | 3.39   | 21   | 2.96   |   |
| 8228 | Kat2a          | -1.15 | 163  | 17.75  | 181  | 15.49  |   |
| 8229 | Kcnk12         | -1.15 | 124  | 4.6    | 156  | 4.01   |   |
| 8230 | LOC685520      | -1.15 | 0    | 2.64   | 0    | 2.3    |   |
| 8231 | Sfmbt2         | -1.15 | 17   | 0.83   | 23   | 0.73   |   |
| 8232 | Sgol2          | -1.15 | 9    | 0.56   | 7    | 0.48   |   |
| 8233 | Tango6         | -1.15 | 98   | 4.8    | 123  | 4.19   |   |
| 8234 | Mt-atp8        | -1.15 | 1634 | 2956.9 | 1918 | 2578.2 |   |
| 8235 | Atxn10         | -1.15 | 646  | 116.22 | 808  | 101.33 |   |
| 8236 | Zfp629         | -1.15 | 577  | 12.03  | 736  | 10.49  |   |
| 8237 | Rps3a          | -1.15 | 101  | 119.15 | 173  | 103.85 |   |
| 8238 | Bnc2           | -1.15 | 353  | 11.43  | 449  | 9.96   |   |
| 8239 | Prkrir         | -1.15 | 212  | 22.89  | 252  | 19.93  |   |
| 8240 | Il17ra         | -1.15 | 106  | 9.7    | 141  | 8.45   |   |
| 8241 | Traf2          | -1.15 | 122  | 16.97  | 138  | 14.78  |   |
| 8242 | Cog2           | -1.15 | 145  | 17.03  | 191  | 14.82  |   |
| 8243 | Eif3i-ps1      | -1.15 | 108  | 47.1   | 134  | 40.99  |   |
| 8244 | Jmy            | -1.15 | 95   | 7.59   | 103  | 6.6    |   |
| 8245 | Fbxl6          | -1.15 | 68   | 11.6   | 78   | 10.09  |   |
| 8246 | Flrt3          | -1.15 | 1257 | 97.08  | 1562 | 84.45  |   |
| 8247 | Senp3          | -1.15 | 186  | 25.28  | 214  | 21.99  |   |
| 8248 | Uggt1          | -1.15 | 655  | 24.62  | 774  | 21.41  |   |
| 8249 | Ndufb11        | -1.15 | 98   | 41.79  | 117  | 36.35  |   |

Supplemental Table 3  
 FSH + Ad-E versus FSH + Ad-FOXO1(A3), 24 hours

|      | A            | B     | C    | D      | E    | F      | G |
|------|--------------|-------|------|--------|------|--------|---|
| 8250 | Dennd5b      | -1.15 | 183  | 11.35  | 237  | 9.87   |   |
| 8251 | Tmx1         | -1.15 | 256  | 44.74  | 319  | 38.9   |   |
| 8252 | Neo1         | -1.15 | 614  | 41.76  | 701  | 36.31  |   |
| 8253 | Epha7        | -1.15 | 70   | 5.19   | 83   | 4.52   |   |
| 8254 | Retsat       | -1.15 | 182  | 27.04  | 224  | 23.5   |   |
| 8255 | Ivns1abp     | -1.15 | 3281 | 256.87 | 3755 | 223.27 |   |
| 8256 | Dph1         | -1.15 | 48   | 12.67  | 89   | 11.01  |   |
| 8257 | Zfp865_2     | -1.15 | 79   | 9.11   | 93   | 7.92   |   |
| 8258 | Vwa5a_2      | -1.15 | 4    | 9.45   | 2    | 8.21   |   |
| 8259 | Gabarap      | -1.15 | 275  | 119.37 | 321  | 103.73 |   |
| 8260 | Snap47       | -1.15 | 64   | 7.58   | 89   | 6.58   |   |
| 8261 | Lrpap1       | -1.15 | 450  | 51.27  | 514  | 44.54  |   |
| 8262 | Stk16        | -1.15 | 74   | 16.64  | 89   | 14.45  |   |
| 8263 | Ebna1bp2     | -1.15 | 1    | 27.62  | 1    | 23.98  |   |
| 8264 | E2f1         | -1.15 | 92   | 2.49   | 306  | 2.16   |   |
| 8265 | Nde1         | -1.15 | 79   | 10.43  | 87   | 9.05   |   |
| 8266 | Slc2a13      | -1.15 | 50   | 1.8    | 75   | 1.57   |   |
| 8267 | Ptchd1       | -1.15 | 36   | 1.74   | 53   | 1.51   |   |
| 8268 | E2f4         | -1.15 | 104  | 15.59  | 118  | 13.53  |   |
| 8269 | Pigq         | -1.15 | 162  | 17.25  | 192  | 14.97  |   |
| 8270 | Mcrs1        | -1.15 | 206  | 38.26  | 258  | 33.21  |   |
| 8271 | Cwf19l1      | -1.15 | 89   | 8.78   | 100  | 7.62   |   |
| 8272 | Hexim1       | -1.15 | 112  | 19.21  | 130  | 16.67  |   |
| 8273 | Sin3a        | -1.15 | 402  | 28.48  | 473  | 24.71  |   |
| 8274 | Abhd12       | -1.15 | 109  | 18.59  | 129  | 16.12  |   |
| 8275 | Armc9        | -1.15 | 242  | 13.33  | 315  | 11.56  |   |
| 8276 | Inpp5a       | -1.15 | 123  | 9.57   | 146  | 8.3    |   |
| 8277 | Mark2        | -1.15 | 220  | 14.96  | 273  | 12.97  |   |
| 8278 | Ppil3        | -1.15 | 35   | 8.81   | 39   | 7.64   |   |
| 8279 | Trove2       | -1.15 | 15   | 2.44   | 20   | 2.11   |   |
| 8280 | Wfdc2        | -1.15 | 42   | 12.38  | 55   | 10.74  |   |
| 8281 | Rpgrip1l     | -1.15 | 77   | 2.56   | 97   | 2.22   |   |
| 8282 | Med25        | -1.15 | 358  | 49.63  | 407  | 43.04  |   |
| 8283 | Dcaf7        | -1.15 | 325  | 20.37  | 382  | 17.66  |   |
| 8284 | Ccnt1        | -1.15 | 27   | 12.54  | 31   | 10.87  |   |
| 8285 | Tram1        | -1.15 | 440  | 45.91  | 506  | 39.79  |   |
| 8286 | Usp24        | -1.15 | 787  | 23.85  | 926  | 20.67  |   |
| 8287 | Poldip3      | -1.15 | 352  | 30.81  | 439  | 26.7   |   |
| 8288 | Trappc13     | -1.15 | 219  | 32.58  | 269  | 28.23  |   |
| 8289 | Kdm6b        | -1.15 | 202  | 17.88  | 239  | 15.49  |   |
| 8290 | Ccng2        | -1.15 | 193  | 25.79  | 225  | 22.35  |   |
| 8291 | Erh          | -1.15 | 139  | 61.59  | 171  | 53.37  |   |
| 8292 | Pml          | -1.15 | 149  | 15.85  | 201  | 13.73  |   |
| 8293 | Ssbp3        | -1.15 | 510  | 67.33  | 664  | 58.34  |   |
| 8294 | Wdr74        | -1.15 | 49   | 9.73   | 63   | 8.43   |   |
| 8295 | Zbtb7a       | -1.15 | 102  | 11.27  | 132  | 9.77   |   |
| 8296 | Tlr3         | -1.15 | 117  | 8.67   | 132  | 7.51   |   |
| 8297 | Ndufb6       | -1.15 | 58   | 36.26  | 61   | 31.42  |   |
| 8298 | LOC498369    | -1.15 | 399  | 31.73  | 482  | 27.49  |   |
| 8299 | C1r          | -1.15 | 532  | 69.28  | 617  | 60     |   |
| 8300 | Hmcn1        | -1.15 | 411  | 6.62   | 479  | 5.74   |   |
| 8301 | Acat2        | -1.16 | 155  | 26.95  | 196  | 23.33  |   |
| 8302 | Mmp24        | -1.16 | 19   | 1.69   | 24   | 1.47   |   |
| 8303 | LOC100362620 | -1.16 | 18   | 11.19  | 27   | 9.68   |   |

Supplemental Table 3  
 FSH + Ad-E versus FSH + Ad-FOXO1(A3), 24 hours

|      | A              | B     | C    | D      | E    | F      | G |
|------|----------------|-------|------|--------|------|--------|---|
| 8304 | Mroh1          | -1.16 | 186  | 9.86   | 240  | 8.53   |   |
| 8305 | Rnf187         | -1.16 | 250  | 45     | 292  | 38.94  |   |
| 8306 | Pa2g4          | -1.16 | 220  | 49.66  | 263  | 42.97  |   |
| 8307 | Ttc13          | -1.16 | 288  | 24.66  | 353  | 21.34  |   |
| 8308 | Ttf2           | -1.16 | 109  | 6.7    | 116  | 5.8    |   |
| 8309 | Phf10          | -1.16 | 235  | 30.83  | 296  | 26.67  |   |
| 8310 | Sharpin        | -1.16 | 76   | 15.45  | 95   | 13.37  |   |
| 8311 | Bfar           | -1.16 | 258  | 18.8   | 306  | 16.26  |   |
| 8312 | Tomm20         | -1.16 | 170  | 56.53  | 196  | 48.89  |   |
| 8313 | Ap1s1          | -1.16 | 167  | 39.6   | 192  | 34.24  |   |
| 8314 | Ppib           | -1.16 | 597  | 215.02 | 692  | 185.89 |   |
| 8315 | Asl            | -1.16 | 52   | 12.95  | 57   | 11.2   |   |
| 8316 | Fbln5          | -1.16 | 214  | 29.89  | 271  | 25.84  |   |
| 8317 | Dock6          | -1.16 | 54   | 2.35   | 64   | 2.03   |   |
| 8318 | Ggt7           | -1.16 | 51   | 6.11   | 63   | 5.28   |   |
| 8319 | Rabggtb        | -1.16 | 153  | 24.57  | 174  | 21.23  |   |
| 8320 | Tbc1d17        | -1.16 | 150  | 20.92  | 173  | 18.08  |   |
| 8321 | Cog1           | -1.16 | 142  | 15.6   | 169  | 13.47  |   |
| 8322 | Pik3cd         | -1.16 | 1194 | 80.54  | 1463 | 69.54  |   |
| 8323 | Cdr2l          | -1.16 | 117  | 8.9    | 124  | 7.68   |   |
| 8324 | Fam222a        | -1.16 | 123  | 16.83  | 139  | 14.53  |   |
| 8325 | Ptprf          | -1.16 | 839  | 39.03  | 975  | 33.7   |   |
| 8326 | Spint2         | -1.16 | 495  | 111.58 | 584  | 96.31  |   |
| 8327 | Gsk3a          | -1.16 | 297  | 43.46  | 359  | 37.5   |   |
| 8328 | AABR07048308.1 | -1.16 | 7    | 15.23  | 6    | 13.14  |   |
| 8329 | Cep41          | -1.16 | 16   | 1.32   | 23   | 1.14   |   |
| 8330 | Mtrr           | -1.16 | 72   | 6.4    | 96   | 5.52   |   |
| 8331 | Pla2r1         | -1.16 | 32   | 1.48   | 36   | 1.27   |   |
| 8332 | RGD1563680     | -1.16 | 62   | 1.75   | 74   | 1.51   |   |
| 8333 | Slc25a33       | -1.16 | 64   | 10.21  | 86   | 8.81   |   |
| 8334 | St7l           | -1.16 | 133  | 4.54   | 168  | 3.92   |   |
| 8335 | Tbc1d22a       | -1.16 | 54   | 12.65  | 80   | 10.91  |   |
| 8336 | AABR07069454.1 | -1.16 | 14   | 2.1    | 15   | 1.81   |   |
| 8337 | Camk1d         | -1.16 | 82   | 3.18   | 86   | 2.74   |   |
| 8338 | Efna4          | -1.16 | 37   | 6.22   | 40   | 5.36   |   |
| 8339 | Marveld2       | -1.16 | 17   | 1.69   | 22   | 1.46   |   |
| 8340 | Mterfd2        | -1.16 | 42   | 10.87  | 47   | 9.38   |   |
| 8341 | Pfkfb4_1       | -1.16 | 9    | 4.6    | 11   | 3.97   |   |
| 8342 | Sts            | -1.16 | 15   | 1.82   | 18   | 1.57   |   |
| 8343 | Styl1          | -1.16 | 47   | 2.87   | 66   | 2.48   |   |
| 8344 | Ube2v2         | -1.16 | 65   | 5.75   | 76   | 4.96   |   |
| 8345 | Ube4b          | -1.16 | 356  | 19.24  | 441  | 16.6   |   |
| 8346 | Wdhd1          | -1.16 | 65   | 4.47   | 89   | 3.85   |   |
| 8347 | Trappc11       | -1.16 | 160  | 10.89  | 203  | 9.39   |   |
| 8348 | Selenbp1_2     | -1.16 | 0    | 39.97  | 0    | 34.46  |   |
| 8349 | Atp5a1         | -1.16 | 1454 | 283.32 | 1679 | 244.25 |   |
| 8350 | Manf           | -1.16 | 273  | 114.97 | 313  | 99.1   |   |
| 8351 | Tbc1d20        | -1.16 | 273  | 57.02  | 345  | 49.15  |   |
| 8352 | Magi3          | -1.16 | 115  | 4.44   | 161  | 3.83   |   |
| 8353 | Slc35a2        | -1.16 | 88   | 13     | 105  | 11.2   |   |
| 8354 | Cry1           | -1.16 | 187  | 23.54  | 227  | 20.29  |   |
| 8355 | Galk1          | -1.16 | 44   | 16.13  | 52   | 13.9   |   |
| 8356 | Minos1         | -1.16 | 179  | 84.6   | 229  | 72.9   |   |
| 8357 | Mcm3ap         | -1.16 | 308  | 15.08  | 344  | 12.99  |   |

Supplemental Table 3  
 FSH + Ad-E versus FSH + Ad-FOXO1(A3), 24 hours

|      | A              | B     | C   | D       | E    | F      | G |
|------|----------------|-------|-----|---------|------|--------|---|
| 8358 | Vgll4          | -1.16 | 182 | 29.63   | 248  | 25.53  |   |
| 8359 | Mrpl44         | -1.16 | 47  | 10.8    | 60   | 9.3    |   |
| 8360 | Igfbp1         | -1.16 | 97  | 6.59    | 107  | 5.67   |   |
| 8361 | Ndor1          | -1.16 | 53  | 6.7     | 69   | 5.77   |   |
| 8362 | Tra2a          | -1.16 | 562 | 35.88   | 748  | 30.9   |   |
| 8363 | Tor1aip1       | -1.16 | 243 | 23.52   | 275  | 20.26  |   |
| 8364 | Gpx7           | -1.16 | 367 | 110.64  | 427  | 95.26  |   |
| 8365 | Mettl5         | -1.16 | 51  | 11.05   | 58   | 9.52   |   |
| 8366 | Ripk2          | -1.16 | 46  | 3.27    | 54   | 2.81   |   |
| 8367 | Tmem98         | -1.16 | 231 | 54.32   | 276  | 46.76  |   |
| 8368 | Samm50         | -1.16 | 139 | 25.66   | 174  | 22.09  |   |
| 8369 | Abca3          | -1.16 | 477 | 24.4    | 574  | 20.99  |   |
| 8370 | Sephs1         | -1.16 | 218 | 10.98   | 260  | 9.44   |   |
| 8371 | Vps33a         | -1.16 | 65  | 5.99    | 70   | 5.16   |   |
| 8372 | Grina          | -1.16 | 631 | 128.65  | 728  | 110.69 |   |
| 8373 | Pcid2          | -1.16 | 99  | 11.18   | 111  | 9.62   |   |
| 8374 | Pdzrn3         | -1.16 | 919 | 31.02   | 1091 | 26.68  |   |
| 8375 | Tmem55b        | -1.16 | 95  | 20.63   | 120  | 17.75  |   |
| 8376 | Ddx49          | -1.16 | 132 | 24.25   | 170  | 20.86  |   |
| 8377 | Gpc4           | -1.16 | 660 | 78.4    | 779  | 67.41  |   |
| 8378 | B4galt2        | -1.16 | 82  | 14.35   | 98   | 12.33  |   |
| 8379 | Gatsl2         | -1.16 | 31  | 5.84    | 43   | 5.02   |   |
| 8380 | Sec61b         | -1.16 | 89  | 51.54   | 96   | 44.31  |   |
| 8381 | AABR07002627.1 | -1.16 | 87  | 11.32   | 88   | 9.74   |   |
| 8382 | Fbxw17         | -1.16 | 62  | 7.83    | 65   | 6.73   |   |
| 8383 | Foxk1          | -1.16 | 41  | 2.6     | 48   | 2.23   |   |
| 8384 | Gnptg          | -1.16 | 50  | 12.38   | 59   | 10.64  |   |
| 8385 | Jak3           | -1.16 | 14  | 1.83    | 12   | 1.57   |   |
| 8386 | RGD1310769     | -1.16 | 69  | 12.91   | 77   | 11.1   |   |
| 8387 | Tgfb3          | -1.16 | 403 | 20.78   | 493  | 17.87  |   |
| 8388 | Scap           | -1.16 | 341 | 25.99   | 394  | 22.34  |   |
| 8389 | Morf4l2        | -1.16 | 860 | 157.72  | 988  | 135.57 |   |
| 8390 | Abhd16a        | -1.16 | 191 | 16.48   | 215  | 14.17  |   |
| 8391 | Ctdsp2         | -1.16 | 136 | 61.31   | 161  | 52.69  |   |
| 8392 | Tgif1          | -1.16 | 316 | 61.17   | 363  | 52.57  |   |
| 8393 | Gtf3c2         | -1.16 | 307 | 23.4    | 378  | 20.11  |   |
| 8394 | Arl8a          | -1.16 | 136 | 24.18   | 173  | 20.77  |   |
| 8395 | Nelfb          | -1.16 | 275 | 32.44   | 332  | 27.87  |   |
| 8396 | 5_8S_rRNA_16   | -1.16 | 0   | 1240.03 | 0    | 1065.1 |   |
| 8397 | Pigm           | -1.16 | 74  | 7.25    | 85   | 6.22   |   |
| 8398 | Ctu1           | -1.16 | 27  | 4.35    | 31   | 3.74   |   |
| 8399 | Klhdc10        | -1.16 | 313 | 16.73   | 364  | 14.36  |   |
| 8400 | Klhl18         | -1.16 | 71  | 5.45    | 69   | 4.68   |   |
| 8401 | Nup210         | -1.16 | 29  | 1.41    | 35   | 1.21   |   |
| 8402 | Kcmf1          | -1.16 | 175 | 32.61   | 213  | 27.99  |   |
| 8403 | Kif4a          | -1.16 | 26  | 2.07    | 40   | 1.78   |   |
| 8404 | Pthr2          | -1.16 | 63  | 6.88    | 69   | 5.91   |   |
| 8405 | Hdac1l_1       | -1.17 | 213 | 45.03   | 244  | 38.65  |   |
| 8406 | Aif1l          | -1.17 | 553 | 60.62   | 623  | 52.02  |   |
| 8407 | Gna12          | -1.17 | 14  | 7.36    | 15   | 6.31   |   |
| 8408 | LOC100911693   | -1.17 | 0   | 2.58    | 0    | 2.21   |   |
| 8409 | MGC94199_2     | -1.17 | 0   | 6.1     | 0    | 5.23   |   |
| 8410 | Nmral1         | -1.17 | 39  | 10.12   | 43   | 8.67   |   |
| 8411 | Tfe3           | -1.17 | 78  | 14.3    | 91   | 12.26  |   |

Supplemental Table 3  
 FSH + Ad-E versus FSH + Ad-FOXO1(A3), 24 hours

|      | A          | B     | C    | D      | E    | F      | G |
|------|------------|-------|------|--------|------|--------|---|
| 8412 | RGD1563365 | -1.17 | 34   | 10.35  | 40   | 8.88   |   |
| 8413 | Mlst8      | -1.17 | 100  | 14.38  | 114  | 12.33  |   |
| 8414 | Zkscan1    | -1.17 | 163  | 17.31  | 187  | 14.84  |   |
| 8415 | Tp53bp1    | -1.17 | 331  | 16.1   | 396  | 13.8   |   |
| 8416 | CommD7     | -1.17 | 51   | 15.51  | 63   | 13.29  |   |
| 8417 | Fam216a    | -1.17 | 52   | 11.99  | 61   | 10.28  |   |
| 8418 | Yif1b_2    | -1.17 | 0    | 7.42   | 0    | 6.36   |   |
| 8419 | Fars2      | -1.17 | 127  | 7.66   | 153  | 6.57   |   |
| 8420 | Asb6       | -1.17 | 68   | 10.38  | 72   | 8.89   |   |
| 8421 | Vps37b     | -1.17 | 88   | 8.91   | 108  | 7.63   |   |
| 8422 | Fbxo34     | -1.17 | 114  | 7.52   | 119  | 6.44   |   |
| 8423 | Nup205     | -1.17 | 188  | 9.65   | 214  | 8.26   |   |
| 8424 | Tex264     | -1.17 | 133  | 24.42  | 173  | 20.89  |   |
| 8425 | Atp6v1d    | -1.17 | 123  | 31.06  | 135  | 26.57  |   |
| 8426 | Prmt5      | -1.17 | 151  | 20.7   | 172  | 17.7   |   |
| 8427 | Rnf10      | -1.17 | 1244 | 104.38 | 1428 | 89.26  |   |
| 8428 | Jade2      | -1.17 | 212  | 18.22  | 235  | 15.58  |   |
| 8429 | Cmip       | -1.17 | 342  | 14.11  | 480  | 12.07  |   |
| 8430 | Fto        | -1.17 | 414  | 21.34  | 517  | 18.25  |   |
| 8431 | Carkd      | -1.17 | 83   | 11.55  | 102  | 9.87   |   |
| 8432 | Chd1l      | -1.17 | 56   | 5.61   | 66   | 4.79   |   |
| 8433 | Cyba       | -1.17 | 9    | 3.3    | 14   | 2.82   |   |
| 8434 | Cyp2j4     | -1.17 | 7    | 1.31   | 12   | 1.12   |   |
| 8435 | Dph5       | -1.17 | 20   | 3.29   | 24   | 2.81   |   |
| 8436 | Pbk        | -1.17 | 18   | 2.77   | 21   | 2.37   |   |
| 8437 | Pcyt1b     | -1.17 | 11   | 1.09   | 19   | 0.94   |   |
| 8438 | Rangrf     | -1.17 | 38   | 9.08   | 32   | 7.76   |   |
| 8439 | Robo1      | -1.17 | 143  | 5.65   | 174  | 4.83   |   |
| 8440 | Rrp36      | -1.17 | 27   | 10.39  | 32   | 8.88   |   |
| 8441 | Rundc1     | -1.17 | 54   | 8.23   | 71   | 7.03   |   |
| 8442 | Sez6l      | -1.17 | 15   | 0.53   | 10   | 0.45   |   |
| 8443 | Taco1      | -1.17 | 18   | 3.37   | 20   | 2.88   |   |
| 8444 | Tbc1d32    | -1.17 | 38   | 1.3    | 46   | 1.11   |   |
| 8445 | Tbrg4      | -1.17 | 82   | 10.98  | 102  | 9.38   |   |
| 8446 | Zfp382     | -1.17 | 74   | 2.4    | 111  | 2.05   |   |
| 8447 | Accsl      | -1.17 | 7    | 1.17   | 9    | 1      |   |
| 8448 | Actg2      | -1.17 | 15   | 3.57   | 16   | 3.05   |   |
| 8449 | Asnsd1     | -1.17 | 98   | 16.64  | 116  | 14.21  |   |
| 8450 | Btbd8_2    | -1.17 | 10   | 4.47   | 15   | 3.82   |   |
| 8451 | C1galt1c1  | -1.17 | 71   | 17.37  | 88   | 14.84  |   |
| 8452 | Ccdc32     | -1.17 | 46   | 5.37   | 54   | 4.58   |   |
| 8453 | Ddx51      | -1.17 | 59   | 6.52   | 60   | 5.57   |   |
| 8454 | Fam134a    | -1.17 | 222  | 28.3   | 258  | 24.18  |   |
| 8455 | Fam181b    | -1.17 | 83   | 22.13  | 82   | 18.91  |   |
| 8456 | Fkbp7      | -1.17 | 87   | 8.82   | 96   | 7.54   |   |
| 8457 | Kcnmb4     | -1.17 | 48   | 10.55  | 69   | 9.02   |   |
| 8458 | Kctd17     | -1.17 | 118  | 10.86  | 124  | 9.28   |   |
| 8459 | Ndfip2     | -1.17 | 148  | 22.82  | 170  | 19.5   |   |
| 8460 | Ngly1      | -1.17 | 121  | 11.37  | 190  | 9.72   |   |
| 8461 | Nuak1      | -1.17 | 23   | 0.94   | 27   | 0.8    |   |
| 8462 | Pemt       | -1.17 | 29   | 5.7    | 39   | 4.87   |   |
| 8463 | RGD1564447 | -1.17 | 265  | 124.81 | 322  | 106.64 |   |
| 8464 | RT1-M3-1   | -1.17 | 42   | 8.57   | 43   | 7.32   |   |
| 8465 | Tm2d1      | -1.17 | 109  | 12.48  | 150  | 10.66  |   |

Supplemental Table 3  
 FSH + Ad-E versus FSH + Ad-FOXO1(A3), 24 hours

|      | A          | B     | C    | D      | E    | F      | G |
|------|------------|-------|------|--------|------|--------|---|
| 8466 | Trap1      | -1.17 | 265  | 38.56  | 300  | 32.94  |   |
| 8467 | Ulk3       | -1.17 | 23   | 4.4    | 33   | 3.76   |   |
| 8468 | Wdr61      | -1.17 | 76   | 13.45  | 94   | 11.5   |   |
| 8469 | Lrrc59     | -1.17 | 388  | 49.88  | 456  | 42.6   |   |
| 8470 | Sec61a1    | -1.17 | 596  | 69.62  | 694  | 59.46  |   |
| 8471 | Zfp532     | -1.17 | 356  | 14.03  | 443  | 11.98  |   |
| 8472 | P4hb       | -1.17 | 1835 | 264.9  | 2099 | 226.21 |   |
| 8473 | Mapkapk2   | -1.17 | 596  | 78.69  | 712  | 67.19  |   |
| 8474 | Smim15     | -1.17 | 92   | 13.31  | 108  | 11.36  |   |
| 8475 | Ip6k1      | -1.17 | 267  | 51.72  | 328  | 44.12  |   |
| 8476 | Timmcd1    | -1.17 | 81   | 15.54  | 101  | 13.25  |   |
| 8477 | Slc12a4    | -1.17 | 571  | 47.84  | 675  | 40.78  |   |
| 8478 | Cdc42bpb   | -1.17 | 568  | 26.41  | 662  | 22.52  |   |
| 8479 | Dhx38      | -1.17 | 207  | 16.36  | 240  | 13.94  |   |
| 8480 | Usp10      | -1.17 | 233  | 21.45  | 281  | 18.28  |   |
| 8481 | Nsfl1c     | -1.17 | 292  | 58.21  | 343  | 49.6   |   |
| 8482 | Gns_2      | -1.17 | 211  | 46.94  | 262  | 39.99  |   |
| 8483 | RGD1563861 | -1.17 | 1085 | 564.16 | 1219 | 480.52 |   |
| 8484 | Ifih1      | -1.17 | 37   | 3.34   | 47   | 2.85   |   |
| 8485 | Tf         | -1.17 | 87   | 7.97   | 107  | 6.79   |   |
| 8486 | Psmid11    | -1.17 | 347  | 32.05  | 383  | 27.28  |   |
| 8487 | Bdh1       | -1.18 | 152  | 15.05  | 190  | 12.81  |   |
| 8488 | Abcd4      | -1.18 | 48   | 4.47   | 51   | 3.8    |   |
| 8489 | Ippk       | -1.18 | 48   | 3.53   | 54   | 3      |   |
| 8490 | Nudt12     | -1.18 | 33   | 2.7    | 38   | 2.3    |   |
| 8491 | Pitrm1     | -1.18 | 340  | 32.73  | 410  | 27.85  |   |
| 8492 | Npat       | -1.18 | 179  | 8.14   | 216  | 6.92   |   |
| 8493 | Nkiras2    | -1.18 | 80   | 12.98  | 91   | 11.04  |   |
| 8494 | Agfg2      | -1.18 | 74   | 6.35   | 112  | 5.4    |   |
| 8495 | Src        | -1.18 | 196  | 19.58  | 230  | 16.64  |   |
| 8496 | RGD1310712 | -1.18 | 179  | 13.01  | 211  | 11.06  |   |
| 8497 | Lmf2       | -1.18 | 162  | 21.48  | 190  | 18.25  |   |
| 8498 | Erc6l      | -1.18 | 22   | 2.01   | 27   | 1.71   |   |
| 8499 | Zfp606     | -1.18 | 35   | 3.25   | 43   | 2.76   |   |
| 8500 | Gsto1      | -1.18 | 40   | 29.07  | 51   | 24.7   |   |
| 8501 | Mkx        | -1.18 | 27   | 5.99   | 39   | 5.09   |   |
| 8502 | Ranbp6     | -1.18 | 65   | 7.2    | 75   | 6.12   |   |
| 8503 | Vsig10l    | -1.18 | 23   | 3.45   | 27   | 2.93   |   |
| 8504 | Wrb        | -1.18 | 147  | 21.29  | 183  | 18.08  |   |
| 8505 | Pcdh11x    | -1.18 | 133  | 4.8    | 134  | 4.08   |   |
| 8506 | Me2        | -1.18 | 589  | 61.86  | 687  | 52.52  |   |
| 8507 | Ndufb2     | -1.18 | 67   | 46.85  | 77   | 39.77  |   |
| 8508 | Rassf1     | -1.18 | 89   | 10.92  | 122  | 9.27   |   |
| 8509 | Ssx2ip     | -1.18 | 52   | 6.1    | 66   | 5.18   |   |
| 8510 | Tsku       | -1.18 | 63   | 8.3    | 78   | 7.05   |   |
| 8511 | Tspan13    | -1.18 | 71   | 11.01  | 74   | 9.34   |   |
| 8512 | Usp27x     | -1.18 | 59   | 11.36  | 66   | 9.64   |   |
| 8513 | Nfkb1      | -1.18 | 299  | 23.51  | 368  | 19.96  |   |
| 8514 | Tpi1       | -1.18 | 7    | 131.64 | 5    | 111.73 |   |
| 8515 | Dpf2       | -1.18 | 343  | 46.28  | 399  | 39.28  |   |
| 8516 | Ngfrap1    | -1.18 | 1463 | 678.29 | 1688 | 575.66 |   |
| 8517 | Nr2f6      | -1.18 | 62   | 7.65   | 60   | 6.49   |   |
| 8518 | Ppp2cb     | -1.18 | 418  | 84.52  | 495  | 71.73  |   |
| 8519 | Sf3b4      | -1.18 | 247  | 55.98  | 290  | 47.5   |   |

Supplemental Table 3  
 FSH + Ad-E versus FSH + Ad-FOXO1(A3), 24 hours

|      | A              | B     | C    | D       | E    | F      | G |
|------|----------------|-------|------|---------|------|--------|---|
| 8520 | Dynll2         | -1.18 | 186  | 27.74   | 212  | 23.54  |   |
| 8521 | Rspry1         | -1.18 | 115  | 14.11   | 137  | 11.98  |   |
| 8522 | AABR07002623.2 | -1.18 | 28   | 27.98   | 37   | 23.73  |   |
| 8523 | Pbx3           | -1.18 | 78   | 6.7     | 89   | 5.68   |   |
| 8524 | Wdr19          | -1.18 | 65   | 4.36    | 78   | 3.7    |   |
| 8525 | Bahcc1         | -1.18 | 128  | 5.52    | 154  | 4.68   |   |
| 8526 | Ppp3r1         | -1.18 | 33   | 27.52   | 39   | 23.34  |   |
| 8527 | Gemin5         | -1.18 | 163  | 9.69    | 186  | 8.22   |   |
| 8528 | Ints9          | -1.18 | 128  | 13.79   | 159  | 11.7   |   |
| 8529 | Smyd2          | -1.18 | 147  | 22.3    | 164  | 18.91  |   |
| 8530 | Ccdc12         | -1.18 | 68   | 20.04   | 93   | 16.98  |   |
| 8531 | Crybg3         | -1.18 | 50   | 2.92    | 54   | 2.47   |   |
| 8532 | Hspbap1        | -1.18 | 112  | 3.67    | 150  | 3.11   |   |
| 8533 | LOC688459      | -1.18 | 31   | 8.32    | 39   | 7.05   |   |
| 8534 | Med8           | -1.18 | 16   | 8.38    | 17   | 7.1    |   |
| 8535 | Slc37a2        | -1.18 | 20   | 1.18    | 24   | 1      |   |
| 8536 | Sumo2l         | -1.18 | 10   | 5.46    | 12   | 4.63   |   |
| 8537 | Susd4          | -1.18 | 82   | 5.51    | 96   | 4.67   |   |
| 8538 | Tmem39b        | -1.18 | 87   | 10.03   | 104  | 8.5    |   |
| 8539 | Tonsl          | -1.18 | 17   | 1.28    | 22   | 1.08   |   |
| 8540 | Gpc2           | -1.18 | 27   | 2.08    | 34   | 1.76   |   |
| 8541 | Mycbp          | -1.18 | 50   | 10.61   | 68   | 8.99   |   |
| 8542 | Zfp330         | -1.18 | 71   | 9.04    | 85   | 7.66   |   |
| 8543 | LOC100911730   | -1.18 | 15   | 88.2    | 17   | 74.68  |   |
| 8544 | Uggt2          | -1.18 | 194  | 11.43   | 241  | 9.68   |   |
| 8545 | Smap1          | -1.18 | 232  | 31.4    | 261  | 26.58  |   |
| 8546 | Gtf3c6         | -1.18 | 56   | 12.3    | 74   | 10.41  |   |
| 8547 | Stard4         | -1.18 | 58   | 7.17    | 66   | 6.07   |   |
| 8548 | Vcp            | -1.18 | 1312 | 147.71  | 1501 | 125.01 |   |
| 8549 | Emc1           | -1.18 | 331  | 18.55   | 364  | 15.7   |   |
| 8550 | Bop1           | -1.18 | 96   | 13.29   | 110  | 11.25  |   |
| 8551 | Crtc2          | -1.18 | 148  | 18.01   | 169  | 15.24  |   |
| 8552 | Ipo13          | -1.18 | 144  | 13.08   | 166  | 11.06  |   |
| 8553 | Ptpn2          | -1.18 | 113  | 9.49    | 131  | 8.03   |   |
| 8554 | Sqle           | -1.18 | 188  | 23.24   | 234  | 19.66  |   |
| 8555 | 5_8S_rRNA_13   | -1.18 | 0    | 1261.32 | 0    | 1066.8 |   |
| 8556 | H2afy          | -1.18 | 606  | 65.11   | 753  | 55.04  |   |
| 8557 | Ube2z          | -1.18 | 273  | 32.96   | 320  | 27.87  |   |
| 8558 | Gcn1l1         | -1.18 | 852  | 34.33   | 995  | 29.02  |   |
| 8559 | Ilkap          | -1.18 | 177  | 24.67   | 249  | 20.85  |   |
| 8560 | LOC100359600   | -1.18 | 6    | 4.21    | 8    | 3.56   |   |
| 8561 | Tdp1           | -1.18 | 30   | 3.24    | 36   | 2.74   |   |
| 8562 | Trex1          | -1.18 | 23   | 8.17    | 27   | 6.91   |   |
| 8563 | Ptma_1         | -1.18 | 696  | 480.58  | 664  | 406.04 |   |
| 8564 | Arpc1a         | -1.18 | 202  | 37.32   | 237  | 31.53  |   |
| 8565 | Nup93          | -1.18 | 178  | 17.63   | 198  | 14.89  |   |
| 8566 | Bzw2           | -1.18 | 972  | 132.25  | 1113 | 111.7  |   |
| 8567 | Eya1           | -1.18 | 143  | 10.86   | 176  | 9.17   |   |
| 8568 | Zc3h12c        | -1.18 | 67   | 6.49    | 84   | 5.48   |   |
| 8569 | Rhoq           | -1.18 | 236  | 18.11   | 303  | 15.29  |   |
| 8570 | Cnrip1         | -1.18 | 34   | 6.8     | 26   | 5.74   |   |
| 8571 | Nup43          | -1.18 | 40   | 6.09    | 51   | 5.14   |   |
| 8572 | Xpo1           | -1.18 | 396  | 29.5    | 440  | 24.9   |   |
| 8573 | Ano10          | -1.19 | 91   | 10.58   | 121  | 8.93   |   |

Supplemental Table 3  
 FSH + Ad-E versus FSH + Ad-FOXO1(A3), 24 hours

|      | A            | B     | C     | D       | E     | F      | G |
|------|--------------|-------|-------|---------|-------|--------|---|
| 8574 | Plscr3       | -1.19 | 180   | 37.12   | 213   | 31.32  |   |
| 8575 | Man2b2       | -1.19 | 49    | 19.77   | 44    | 16.68  |   |
| 8576 | AC109958.1   | -1.19 | 19    | 15.09   | 22    | 12.72  |   |
| 8577 | Ppp2ca       | -1.19 | 76    | 60.73   | 78    | 51.23  |   |
| 8578 | Cacnb2       | -1.19 | 136   | 6.19    | 257   | 5.22   |   |
| 8579 | Slc39a7      | -1.19 | 510   | 78.28   | 581   | 66.03  |   |
| 8580 | Arl2bp       | -1.19 | 311   | 50.9    | 358   | 42.93  |   |
| 8581 | Ctnnb1       | -1.19 | 1190  | 176.44  | 1340  | 148.81 |   |
| 8582 | RGD1310127   | -1.19 | 84    | 17.73   | 107   | 14.95  |   |
| 8583 | Sptlc1       | -1.19 | 160   | 10.26   | 197   | 8.65   |   |
| 8584 | Dap          | -1.19 | 648   | 119.25  | 781   | 100.55 |   |
| 8585 | Arl5a        | -1.19 | 172   | 17.96   | 239   | 15.14  |   |
| 8586 | Nipsnap3b    | -1.19 | 49    | 14.75   | 62    | 12.43  |   |
| 8587 | Tom1         | -1.19 | 112   | 15.03   | 135   | 12.67  |   |
| 8588 | AC135696.1   | -1.19 | 18    | 7.66    | 25    | 6.46   |   |
| 8589 | Uqcrc1       | -1.19 | 324   | 68.6    | 366   | 57.83  |   |
| 8590 | Rnf114       | -1.19 | 174   | 26.54   | 203   | 22.37  |   |
| 8591 | Farsb        | -1.19 | 128   | 19.21   | 154   | 16.19  |   |
| 8592 | Eef1g        | -1.19 | 1304  | 396.85  | 1394  | 334.34 |   |
| 8593 | Usp14        | -1.19 | 175   | 22.52   | 190   | 18.98  |   |
| 8594 | Eif4ebp1     | -1.19 | 161   | 60.84   | 174   | 51.26  |   |
| 8595 | Ing1         | -1.19 | 71    | 13.92   | 80    | 11.72  |   |
| 8596 | Rpl34-ps1    | -1.19 | 60    | 66.99   | 76    | 56.42  |   |
| 8597 | Coro7        | -1.19 | 92    | 9.57    | 113   | 8.06   |   |
| 8598 | Mt-co1       | -1.19 | 25345 | 5982.22 | 28651 | 5037.8 |   |
| 8599 | Ifitm2       | -1.19 | 314   | 177.48  | 353   | 149.43 |   |
| 8600 | Chd3         | -1.19 | 854   | 42.72   | 959   | 35.96  |   |
| 8601 | Rpsa         | -1.19 | 1240  | 542.57  | 1354  | 456.74 |   |
| 8602 | Rnf123       | -1.19 | 137   | 13.63   | 145   | 11.47  |   |
| 8603 | AC103179.2   | -1.19 | 8     | 1.21    | 9     | 1.02   |   |
| 8604 | B9d2         | -1.19 | 19    | 2.37    | 15    | 2      |   |
| 8605 | Cstb         | -1.19 | 169   | 95.04   | 188   | 79.94  |   |
| 8606 | Gem          | -1.19 | 96    | 19.6    | 109   | 16.48  |   |
| 8607 | Glo1         | -1.19 | 92    | 27.72   | 96    | 23.31  |   |
| 8608 | Mpc2         | -1.19 | 53    | 30.17   | 67    | 25.38  |   |
| 8609 | Mthfsd       | -1.19 | 20    | 2.65    | 21    | 2.22   |   |
| 8610 | Nog          | -1.19 | 8     | 1.78    | 9     | 1.5    |   |
| 8611 | Pdcd2        | -1.19 | 43    | 7.66    | 37    | 6.45   |   |
| 8612 | Pkhd11       | -1.19 | 27    | 0.44    | 28    | 0.37   |   |
| 8613 | Plekhn1      | -1.19 | 19    | 1.03    | 15    | 0.87   |   |
| 8614 | RGD1311575   | -1.19 | 19    | 0.86    | 24    | 0.72   |   |
| 8615 | RGD1563072_2 | -1.19 | 14    | 6.95    | 18    | 5.85   |   |
| 8616 | Swi5         | -1.19 | 270   | 122.63  | 310   | 103.14 |   |
| 8617 | Tatdn3       | -1.19 | 26    | 6.2     | 33    | 5.21   |   |
| 8618 | AC098459.1   | -1.19 | 9     | 8.15    | 8     | 6.85   |   |
| 8619 | Alkbh6_2     | -1.19 | 0     | 4.02    | 1     | 3.38   |   |
| 8620 | Ccdc125      | -1.19 | 20    | 1.27    | 17    | 1.07   |   |
| 8621 | Cenpn        | -1.19 | 48    | 3.16    | 49    | 2.66   |   |
| 8622 | Grhpr        | -1.19 | 28    | 4.61    | 36    | 3.88   |   |
| 8623 | Homez        | -1.19 | 24    | 3.29    | 23    | 2.77   |   |
| 8624 | Pgm1         | -1.19 | 139   | 19.06   | 162   | 16.03  |   |
| 8625 | Pih1d2       | -1.19 | 13    | 2.22    | 19    | 1.87   |   |
| 8626 | Prg4         | -1.19 | 12    | 0.91    | 12    | 0.77   |   |
| 8627 | Prss36       | -1.19 | 9     | 1.05    | 15    | 0.88   |   |



Supplemental Table 3  
 FSH + Ad-E versus FSH + Ad-FOXO1(A3), 24 hours

|      | A            | B     | C    | D      | E    | F      | G |
|------|--------------|-------|------|--------|------|--------|---|
| 8628 | S100a16      | -1.19 | 8    | 2.51   | 9    | 2.11   |   |
| 8629 | Stard8       | -1.19 | 10   | 0.52   | 10   | 0.44   |   |
| 8630 | Vom2r6       | -1.19 | 28   | 3.44   | 23   | 2.89   |   |
| 8631 | Zfp759       | -1.19 | 43   | 1.12   | 63   | 0.94   |   |
| 8632 | Pttg1ip      | -1.19 | 751  | 102.8  | 863  | 86.44  |   |
| 8633 | Eif4g2       | -1.19 | 2143 | 291.88 | 2121 | 245.35 |   |
| 8634 | Mlit1        | -1.19 | 175  | 14.89  | 201  | 12.51  |   |
| 8635 | Cyp51        | -1.19 | 475  | 49.74  | 540  | 41.81  |   |
| 8636 | LOC100362149 | -1.19 | 272  | 371.43 | 127  | 312.13 |   |
| 8637 | Stt3a        | -1.19 | 642  | 26.34  | 729  | 22.12  |   |
| 8638 | Gcdh         | -1.19 | 88   | 14.1   | 86   | 11.84  |   |
| 8639 | Fam160b1     | -1.19 | 172  | 20.53  | 199  | 17.24  |   |
| 8640 | Rab11b       | -1.19 | 441  | 81.2   | 525  | 68.17  |   |
| 8641 | Fam13a       | -1.19 | 179  | 14.44  | 216  | 12.12  |   |
| 8642 | Pik3c2b      | -1.19 | 64   | 1.95   | 68   | 1.63   |   |
| 8643 | Ywhag        | -1.19 | 1054 | 105.96 | 1184 | 88.9   |   |
| 8644 | R3hcc1       | -1.19 | 96   | 16.66  | 110  | 13.98  |   |
| 8645 | Uqcrb        | -1.19 | 31   | 14.43  | 38   | 12.1   |   |
| 8646 | Zdhhc16      | -1.19 | 111  | 16.45  | 119  | 13.8   |   |
| 8647 | Atp5g1       | -1.19 | 78   | 52.92  | 78   | 44.39  |   |
| 8648 | Vars2        | -1.19 | 89   | 6.95   | 96   | 5.83   |   |
| 8649 | Glg1         | -1.19 | 1332 | 57.84  | 1511 | 48.51  |   |
| 8650 | Lsm12        | -1.19 | 251  | 37.28  | 297  | 31.26  |   |
| 8651 | Tmem55a      | -1.19 | 154  | 17.3   | 210  | 14.5   |   |
| 8652 | Oxa1l        | -1.19 | 369  | 52.17  | 429  | 43.73  |   |
| 8653 | Hp           | -1.19 | 38   | 10.13  | 42   | 8.49   |   |
| 8654 | Ackr3        | -1.19 | 171  | 29.36  | 200  | 24.61  |   |
| 8655 | Gng10        | -1.19 | 193  | 61.47  | 224  | 51.51  |   |
| 8656 | Zfp523       | -1.19 | 105  | 13.08  | 132  | 10.96  |   |
| 8657 | Arl6ip1      | -1.19 | 276  | 44.71  | 313  | 37.46  |   |
| 8658 | Rnf181       | -1.19 | 202  | 33.84  | 225  | 28.35  |   |
| 8659 | Qars         | -1.19 | 399  | 49.95  | 439  | 41.84  |   |
| 8660 | Sars2        | -1.19 | 34   | 3.72   | 35   | 3.11   |   |
| 8661 | AC141516.3   | -1.19 | 8    | 18.03  | 8    | 15.1   |   |
| 8662 | Aven         | -1.19 | 37   | 8.55   | 45   | 7.16   |   |
| 8663 | RT1-CE4      | -1.19 | 17   | 3.95   | 26   | 3.31   |   |
| 8664 | SNORD47_2    | -1.19 | 95   | 464.19 | 110  | 388.69 |   |
| 8665 | Psmc1        | -1.19 | 280  | 59.9   | 312  | 50.15  |   |
| 8666 | Lrp5         | -1.19 | 463  | 29.8   | 536  | 24.95  |   |
| 8667 | Serpine2     | -1.19 | 1571 | 252.57 | 1787 | 211.41 |   |
| 8668 | Pfcp         | -1.19 | 781  | 95.59  | 881  | 80     |   |
| 8669 | Ahcy         | -1.19 | 198  | 35.43  | 220  | 29.65  |   |
| 8670 | Cnp          | -1.19 | 241  | 38.24  | 276  | 32     |   |
| 8671 | Tufm         | -1.2  | 170  | 32.29  | 194  | 27.01  |   |
| 8672 | Zfp426       | -1.2  | 50   | 5.57   | 54   | 4.66   |   |
| 8673 | Eif3f        | -1.2  | 427  | 114.6  | 485  | 95.87  |   |
| 8674 | Ncor2        | -1.2  | 650  | 22.62  | 720  | 18.93  |   |
| 8675 | Txnl4b       | -1.2  | 43   | 8.92   | 55   | 7.47   |   |
| 8676 | Mia3         | -1.2  | 377  | 27.98  | 475  | 23.4   |   |
| 8677 | Narfl        | -1.2  | 62   | 7.93   | 75   | 6.63   |   |
| 8678 | Tmem101      | -1.2  | 61   | 12.6   | 62   | 10.54  |   |
| 8679 | Txndc11      | -1.2  | 180  | 15.91  | 230  | 13.3   |   |
| 8680 | Rtcd1        | -1.2  | 123  | 21.77  | 148  | 18.2   |   |
| 8681 | Hmgxb4       | -1.2  | 140  | 8.26   | 184  | 6.9    |   |

Supplemental Table 3  
 FSH + Ad-E versus FSH + Ad-FOXO1(A3), 24 hours

|      | A              | B    | C    | D      | E    | F      | G |
|------|----------------|------|------|--------|------|--------|---|
| 8682 | Ctbp1          | -1.2 | 637  | 97.98  | 726  | 81.91  |   |
| 8683 | AABR07010563.1 | -1.2 | 38   | 16.48  | 40   | 13.77  |   |
| 8684 | Brk1           | -1.2 | 164  | 39.1   | 228  | 32.67  |   |
| 8685 | Chchd5         | -1.2 | 36   | 8.15   | 40   | 6.81   |   |
| 8686 | Dmap1          | -1.2 | 53   | 11.81  | 66   | 9.87   |   |
| 8687 | Hspb6          | -1.2 | 20   | 4.7    | 21   | 3.93   |   |
| 8688 | Ppara          | -1.2 | 43   | 2.89   | 43   | 2.42   |   |
| 8689 | Rcor1_2        | -1.2 | 136  | 16.37  | 152  | 13.68  |   |
| 8690 | Rpn2           | -1.2 | 794  | 108.37 | 895  | 90.55  |   |
| 8691 | Ubald2         | -1.2 | 16   | 12.51  | 24   | 10.45  |   |
| 8692 | Xrcc6bp1       | -1.2 | 29   | 5.69   | 29   | 4.76   |   |
| 8693 | Gipc1          | -1.2 | 149  | 22.68  | 182  | 18.96  |   |
| 8694 | Nudcd2         | -1.2 | 52   | 11.77  | 57   | 9.83   |   |
| 8695 | Tmem30a        | -1.2 | 268  | 48.06  | 319  | 40.15  |   |
| 8696 | Napa           | -1.2 | 213  | 46.17  | 262  | 38.57  |   |
| 8697 | Plod3          | -1.2 | 360  | 47.13  | 402  | 39.37  |   |
| 8698 | Brd2           | -1.2 | 35   | 40.39  | 25   | 33.73  |   |
| 8699 | Degs1          | -1.2 | 219  | 53.92  | 234  | 45.02  |   |
| 8700 | Psmb1          | -1.2 | 290  | 87.13  | 334  | 72.74  |   |
| 8701 | Ephb6          | -1.2 | 189  | 16.03  | 211  | 13.38  |   |
| 8702 | mrpl9          | -1.2 | 67   | 14.08  | 81   | 11.75  |   |
| 8703 | Rnf149         | -1.2 | 111  | 18.33  | 147  | 15.3   |   |
| 8704 | Arhgef2        | -1.2 | 319  | 23.07  | 382  | 19.26  |   |
| 8705 | Hmgn2          | -1.2 | 306  | 124.33 | 355  | 103.77 |   |
| 8706 | Scamp4         | -1.2 | 209  | 36.1   | 238  | 30.13  |   |
| 8707 | Fam111a        | -1.2 | 44   | 4.88   | 50   | 4.07   |   |
| 8708 | Gramd1a        | -1.2 | 290  | 25.74  | 335  | 21.48  |   |
| 8709 | Vdac2          | -1.2 | 481  | 89.94  | 552  | 75.02  |   |
| 8710 | Akr1a1         | -1.2 | 811  | 227.41 | 927  | 189.68 |   |
| 8711 | Mutyh          | -1.2 | 45   | 5.64   | 41   | 4.71   |   |
| 8712 | Spidr          | -1.2 | 98   | 6.1    | 122  | 5.09   |   |
| 8713 | Bmi1           | -1.2 | 29   | 8.37   | 31   | 6.98   |   |
| 8714 | Rab8b          | -1.2 | 97   | 6.39   | 120  | 5.33   |   |
| 8715 | Repin1         | -1.2 | 53   | 8.39   | 58   | 7      |   |
| 8716 | Polr3c         | -1.2 | 113  | 13.32  | 133  | 11.1   |   |
| 8717 | Prep           | -1.2 | 304  | 31.05  | 333  | 25.88  |   |
| 8718 | Ppp1r16a       | -1.2 | 73   | 8.4    | 83   | 7      |   |
| 8719 | Ndfip1         | -1.2 | 540  | 92.32  | 599  | 76.93  |   |
| 8720 | Smoc1          | -1.2 | 2778 | 388.77 | 3698 | 323.98 |   |
| 8721 | Acadsb         | -1.2 | 66   | 6.21   | 86   | 5.17   |   |
| 8722 | Ogfod3         | -1.2 | 40   | 9.64   | 46   | 8.03   |   |
| 8723 | Tymp           | -1.2 | 90   | 10.78  | 110  | 8.98   |   |
| 8724 | Bloc1s5        | -1.2 | 45   | 7.11   | 55   | 5.92   |   |
| 8725 | Smpd4          | -1.2 | 137  | 11.96  | 149  | 9.96   |   |
| 8726 | Hm13           | -1.2 | 475  | 49.37  | 600  | 41.11  |   |
| 8727 | Smarcb1        | -1.2 | 386  | 33.45  | 425  | 27.85  |   |
| 8728 | Mapk1          | -1.2 | 294  | 43.32  | 410  | 36.07  |   |
| 8729 | Spsb1          | -1.2 | 1030 | 116.29 | 1185 | 96.81  |   |
| 8730 | Mief1          | -1.2 | 122  | 16.54  | 143  | 13.76  |   |
| 8731 | Slc48a1        | -1.2 | 107  | 22.66  | 123  | 18.86  |   |
| 8732 | Ncoa5          | -1.2 | 222  | 16.97  | 280  | 14.12  |   |
| 8733 | Stim1          | -1.2 | 188  | 13.87  | 223  | 11.54  |   |
| 8734 | Wbp11_2        | -1.2 | 0    | 7.73   | 0    | 6.44   |   |
| 8735 | Tmem115        | -1.2 | 109  | 17.53  | 120  | 14.59  |   |

Supplemental Table 3  
 FSH + Ad-E versus FSH + Ad-FOXO1(A3), 24 hours

|      | A              | B     | C   | D      | E    | F     | G |
|------|----------------|-------|-----|--------|------|-------|---|
| 8736 | Decr2          | -1.2  | 93  | 6.45   | 108  | 5.36  |   |
| 8737 | Cul4a          | -1.2  | 582 | 37.41  | 649  | 31.11 |   |
| 8738 | Slc25a3        | -1.2  | 474 | 106.98 | 566  | 88.95 |   |
| 8739 | Ddx41          | -1.2  | 153 | 30.04  | 153  | 24.97 |   |
| 8740 | Git1           | -1.2  | 377 | 42.45  | 426  | 35.29 |   |
| 8741 | Leprotl1       | -1.2  | 228 | 27.37  | 255  | 22.75 |   |
| 8742 | Tp53i11        | -1.2  | 308 | 38.3   | 340  | 31.83 |   |
| 8743 | Rrp9           | -1.2  | 54  | 10.23  | 54   | 8.5   |   |
| 8744 | AABR07031734.2 | -1.2  | 9   | 1.36   | 10   | 1.13  |   |
| 8745 | Acot2          | -1.2  | 24  | 4.12   | 18   | 3.42  |   |
| 8746 | Arrb2          | -1.2  | 59  | 13.36  | 49   | 11.1  |   |
| 8747 | Cdhr2          | -1.2  | 11  | 0.83   | 10   | 0.69  |   |
| 8748 | Dok1           | -1.2  | 9   | 1.89   | 10   | 1.57  |   |
| 8749 | Gnat1          | -1.2  | 9   | 1.5    | 10   | 1.25  |   |
| 8750 | LOC100359825   | -1.2  | 1   | 9.79   | 0    | 8.13  |   |
| 8751 | Mblac1         | -1.2  | 9   | 2.58   | 10   | 2.14  |   |
| 8752 | Nipsnap1       | -1.2  | 170 | 17.3   | 190  | 14.37 |   |
| 8753 | Rab7b          | -1.2  | 45  | 5.05   | 60   | 4.19  |   |
| 8754 | Rnf215         | -1.2  | 95  | 11.77  | 106  | 9.78  |   |
| 8755 | Slc25a25       | -1.2  | 50  | 5.2    | 51   | 4.32  |   |
| 8756 | Fam174a        | -1.2  | 61  | 14.17  | 68   | 11.77 |   |
| 8757 | Ifi44          | -1.2  | 62  | 4.44   | 74   | 3.69  |   |
| 8758 | LOC100909856   | -1.2  | 7   | 4.3    | 3    | 3.58  |   |
| 8759 | Mrpl34         | -1.2  | 36  | 22.83  | 40   | 18.96 |   |
| 8760 | Pcdhga5        | -1.2  | 9   | 1.34   | 10   | 1.12  |   |
| 8761 | Snopc1         | -1.2  | 45  | 7.39   | 57   | 6.14  |   |
| 8762 | Zswim8         | -1.2  | 0   | 1.2    | 0    | 0.99  |   |
| 8763 | Epn1           | -1.2  | 270 | 40.69  | 304  | 33.79 |   |
| 8764 | AABR07073181.1 | -1.2  | 147 | 6.93   | 175  | 5.75  |   |
| 8765 | Hdac3          | -1.2  | 158 | 27.36  | 178  | 22.71 |   |
| 8766 | Psmc14         | -1.21 | 121 | 22.86  | 147  | 18.97 |   |
| 8767 | Snx3           | -1.21 | 209 | 58.76  | 250  | 48.76 |   |
| 8768 | Arsa           | -1.21 | 159 | 15.53  | 180  | 12.89 |   |
| 8769 | Mtfr1l         | -1.21 | 164 | 28.7   | 180  | 23.81 |   |
| 8770 | Xab2           | -1.21 | 145 | 17.77  | 164  | 14.74 |   |
| 8771 | Pan3           | -1.21 | 423 | 28.01  | 493  | 23.23 |   |
| 8772 | Iffo1          | -1.21 | 151 | 9.77   | 183  | 8.1   |   |
| 8773 | Fuk            | -1.21 | 64  | 4.32   | 63   | 3.58  |   |
| 8774 | Ipp            | -1.21 | 76  | 7.07   | 99   | 5.86  |   |
| 8775 | Ostm1          | -1.21 | 95  | 23.12  | 109  | 19.16 |   |
| 8776 | Cnpy2          | -1.21 | 148 | 46.8   | 156  | 38.79 |   |
| 8777 | Timp1          | -1.21 | 75  | 58.71  | 78   | 48.65 |   |
| 8778 | Atp6v0a1       | -1.21 | 926 | 62.56  | 1035 | 51.83 |   |
| 8779 | Ccdc124        | -1.21 | 43  | 8.34   | 55   | 6.91  |   |
| 8780 | Scarb2         | -1.21 | 618 | 92.29  | 728  | 76.44 |   |
| 8781 | Spats2         | -1.21 | 27  | 9.03   | 30   | 7.48  |   |
| 8782 | Ift20          | -1.21 | 67  | 20.9   | 82   | 17.31 |   |
| 8783 | Ppp1r9b        | -1.21 | 165 | 12.69  | 183  | 10.51 |   |
| 8784 | Mrps35         | -1.21 | 34  | 4.53   | 50   | 3.75  |   |
| 8785 | Tecpr1         | -1.21 | 159 | 9.84   | 189  | 8.15  |   |
| 8786 | Col1a1         | -1.21 | 56  | 3.48   | 62   | 2.88  |   |
| 8787 | Stat6          | -1.21 | 113 | 17.01  | 139  | 14.08 |   |
| 8788 | Tnfsf10        | -1.21 | 30  | 2.64   | 37   | 2.18  |   |
| 8789 | Ctbs           | -1.21 | 71  | 23.08  | 95   | 19.1  |   |

Supplemental Table 3  
 FSH + Ad-E versus FSH + Ad-FOXO1(A3), 24 hours

|      | A              | B     | C   | D     | E   | F     | G |
|------|----------------|-------|-----|-------|-----|-------|---|
| 8790 | Slc35a4        | -1.21 | 245 | 35.61 | 270 | 29.46 |   |
| 8791 | Tmem97         | -1.21 | 52  | 13.71 | 59  | 11.34 |   |
| 8792 | Derl1          | -1.21 | 311 | 39.44 | 354 | 32.62 |   |
| 8793 | Atrn           | -1.21 | 689 | 24.61 | 797 | 20.35 |   |
| 8794 | LOC679811      | -1.21 | 246 | 14.43 | 336 | 11.94 |   |
| 8795 | Szt2           | -1.21 | 244 | 7.01  | 268 | 5.79  |   |
| 8796 | Ints5          | -1.21 | 103 | 11.5  | 114 | 9.51  |   |
| 8797 | Plekha3        | -1.21 | 115 | 22.22 | 142 | 18.37 |   |
| 8798 | Zfp398         | -1.21 | 80  | 5.97  | 106 | 4.93  |   |
| 8799 | C4b            | -1.21 | 11  | 1.29  | 9   | 1.07  |   |
| 8800 | LOC681282      | -1.21 | 23  | 10.28 | 24  | 8.5   |   |
| 8801 | Panx2          | -1.21 | 33  | 2.36  | 31  | 1.95  |   |
| 8802 | Rnf185         | -1.21 | 137 | 14.97 | 156 | 12.37 |   |
| 8803 | Zfp524         | -1.21 | 19  | 6.56  | 21  | 5.42  |   |
| 8804 | Zfp866_1       | -1.21 | 38  | 8.84  | 40  | 7.3   |   |
| 8805 | AABR07027870.1 | -1.21 | 11  | 2.23  | 15  | 1.85  |   |
| 8806 | Atg4d          | -1.21 | 70  | 10.64 | 78  | 8.8   |   |
| 8807 | Dpcd           | -1.21 | 33  | 7.82  | 45  | 6.46  |   |
| 8808 | Ttc8           | -1.21 | 102 | 11.68 | 119 | 9.65  |   |
| 8809 | Wdr82          | -1.21 | 201 | 41.64 | 242 | 34.4  |   |
| 8810 | Gars           | -1.21 | 522 | 72.93 | 595 | 60.24 |   |
| 8811 | Scrib          | -1.21 | 368 | 21.21 | 422 | 17.52 |   |
| 8812 | St3gal5        | -1.21 | 372 | 44.96 | 468 | 37.12 |   |
| 8813 | Stk11          | -1.21 | 230 | 22.29 | 274 | 18.4  |   |
| 8814 | Abcf3          | -1.21 | 110 | 13.79 | 128 | 11.38 |   |
| 8815 | Mapk8ip1       | -1.21 | 97  | 11.62 | 108 | 9.59  |   |
| 8816 | Rab40c         | -1.21 | 79  | 7.13  | 106 | 5.89  |   |
| 8817 | Fam21c         | -1.21 | 523 | 40.07 | 600 | 33.07 |   |
| 8818 | Tspan14        | -1.21 | 122 | 18.93 | 134 | 15.62 |   |
| 8819 | Zfp553         | -1.21 | 104 | 17.69 | 117 | 14.6  |   |
| 8820 | Ckap4          | -1.21 | 617 | 87.82 | 680 | 72.45 |   |
| 8821 | Ctu2           | -1.21 | 32  | 5.43  | 32  | 4.48  |   |
| 8822 | Fry            | -1.21 | 79  | 1.88  | 109 | 1.55  |   |
| 8823 | Hacl1          | -1.21 | 43  | 1.8   | 55  | 1.49  |   |
| 8824 | Kifc1          | -1.21 | 39  | 4.59  | 42  | 3.79  |   |
| 8825 | Mipep          | -1.21 | 71  | 8.54  | 85  | 7.05  |   |
| 8826 | Prpf4          | -1.21 | 99  | 12.13 | 112 | 10.01 |   |
| 8827 | Rpa3           | -1.21 | 33  | 17.02 | 38  | 14.04 |   |
| 8828 | Traf4          | -1.21 | 96  | 15.72 | 100 | 12.97 |   |
| 8829 | Slc35b4        | -1.21 | 164 | 14.49 | 186 | 11.96 |   |
| 8830 | Clptm1l        | -1.21 | 498 | 75.8  | 561 | 62.52 |   |
| 8831 | Dync1li1       | -1.21 | 112 | 19.38 | 142 | 15.98 |   |
| 8832 | Ubl3           | -1.21 | 258 | 31.3  | 290 | 25.81 |   |
| 8833 | AABR07029710.1 | -1.21 | 2   | 10.62 | 0   | 8.75  |   |
| 8834 | Hps4           | -1.21 | 102 | 8.47  | 106 | 6.99  |   |
| 8835 | Rangap1        | -1.21 | 193 | 21.68 | 229 | 17.87 |   |
| 8836 | Klc4           | -1.21 | 89  | 10.62 | 106 | 8.75  |   |
| 8837 | Smcr8          | -1.21 | 169 | 16.43 | 199 | 13.55 |   |
| 8838 | Tbpl1          | -1.21 | 84  | 11.27 | 107 | 9.29  |   |
| 8839 | Nhp2_2         | -1.21 | 2   | 18.17 | 2   | 14.98 |   |
| 8840 | Anapc2         | -1.21 | 423 | 52.67 | 485 | 43.4  |   |
| 8841 | Sphk2          | -1.21 | 112 | 16.42 | 133 | 13.52 |   |
| 8842 | Gfpt2          | -1.21 | 84  | 8.34  | 90  | 6.87  |   |
| 8843 | Med14          | -1.21 | 452 | 29.92 | 509 | 24.63 |   |

Supplemental Table 3  
 FSH + Ad-E versus FSH + Ad-FOXO1(A3), 24 hours

|      | A               | B     | C   | D      | E   | F      | G |
|------|-----------------|-------|-----|--------|-----|--------|---|
| 8844 | Mgat2           | -1.22 | 117 | 17.33  | 131 | 14.26  |   |
| 8845 | Rps5            | -1.22 | 734 | 348.82 | 815 | 286.97 |   |
| 8846 | Adcy2           | -1.22 | 22  | 1.13   | 35  | 0.93   |   |
| 8847 | Aurkc           | -1.22 | 31  | 6.54   | 32  | 5.37   |   |
| 8848 | Brpf3           | -1.22 | 223 | 11.48  | 249 | 9.44   |   |
| 8849 | Cndp2           | -1.22 | 63  | 10.4   | 75  | 8.56   |   |
| 8850 | Cryab           | -1.22 | 30  | 8.7    | 34  | 7.16   |   |
| 8851 | Dhrs13          | -1.22 | 21  | 6.51   | 25  | 5.35   |   |
| 8852 | Gar1            | -1.22 | 22  | 5.36   | 29  | 4.41   |   |
| 8853 | LOC100365556    | -1.22 | 52  | 1.13   | 66  | 0.93   |   |
| 8854 | Mettl8          | -1.22 | 32  | 1.17   | 51  | 0.96   |   |
| 8855 | Mpi             | -1.22 | 66  | 11.94  | 74  | 9.82   |   |
| 8856 | Mrvi1           | -1.22 | 12  | 0.59   | 23  | 0.48   |   |
| 8857 | Ndufa2          | -1.22 | 40  | 25.86  | 44  | 21.27  |   |
| 8858 | Ndufc2          | -1.22 | 64  | 32.33  | 68  | 26.59  |   |
| 8859 | Pdgfra          | -1.22 | 11  | 0.56   | 12  | 0.46   |   |
| 8860 | Rad51ap1        | -1.22 | 19  | 1.83   | 17  | 1.5    |   |
| 8861 | Tlr2            | -1.22 | 10  | 1.4    | 11  | 1.15   |   |
| 8862 | AABR07034750.1  | -1.22 | 1   | 0.67   | 2   | 0.55   |   |
| 8863 | ENSRNOG00000060 | -1.22 | 68  | 1.46   | 98  | 1.2    |   |
| 8864 | Mad2l1bp        | -1.22 | 20  | 3.91   | 24  | 3.21   |   |
| 8865 | Ndufb5          | -1.22 | 98  | 27.27  | 122 | 22.43  |   |
| 8866 | Nol6            | -1.22 | 211 | 14.34  | 238 | 11.79  |   |
| 8867 | Ramp1           | -1.22 | 39  | 13.44  | 50  | 11.06  |   |
| 8868 | Rgs2            | -1.22 | 167 | 66.74  | 184 | 54.89  |   |
| 8869 | Rnf13           | -1.22 | 259 | 29.45  | 267 | 24.22  |   |
| 8870 | Kdm4a           | -1.22 | 540 | 29.77  | 581 | 24.47  |   |
| 8871 | Ctnnb1          | -1.22 | 171 | 21.33  | 185 | 17.53  |   |
| 8872 | Zfp862          | -1.22 | 139 | 11.06  | 166 | 9.09   |   |
| 8873 | Slc41a1         | -1.22 | 295 | 22.04  | 327 | 18.1   |   |
| 8874 | Atf7ip          | -1.22 | 253 | 19.54  | 277 | 16.05  |   |
| 8875 | Gstt2           | -1.22 | 90  | 18.7   | 95  | 15.36  |   |
| 8876 | Synm            | -1.22 | 189 | 8.91   | 211 | 7.32   |   |
| 8877 | Mrps6           | -1.22 | 353 | 26.42  | 673 | 21.69  |   |
| 8878 | Zfp347          | -1.22 | 38  | 10.59  | 51  | 8.7    |   |
| 8879 | Foxo3           | -1.22 | 125 | 11.57  | 156 | 9.49   |   |
| 8880 | Rasef           | -1.22 | 55  | 6.08   | 60  | 4.99   |   |
| 8881 | lah1            | -1.22 | 91  | 32.55  | 101 | 26.71  |   |
| 8882 | Bnip3           | -1.22 | 105 | 25.29  | 117 | 20.75  |   |
| 8883 | Tef             | -1.22 | 209 | 15.22  | 256 | 12.48  |   |
| 8884 | Elovl5          | -1.22 | 370 | 114.79 | 419 | 94.15  |   |
| 8885 | Ern1            | -1.22 | 239 | 10.78  | 283 | 8.85   |   |
| 8886 | G6pdx           | -1.22 | 622 | 89.45  | 679 | 73.36  |   |
| 8887 | Sema4b          | -1.22 | 572 | 52.95  | 619 | 43.42  |   |
| 8888 | Ifi35           | -1.22 | 67  | 20.96  | 87  | 17.19  |   |
| 8889 | Tmco6           | -1.22 | 42  | 6.09   | 44  | 5      |   |
| 8890 | Zmat1           | -1.22 | 63  | 5.79   | 98  | 4.75   |   |
| 8891 | Nudt9           | -1.22 | 39  | 8.06   | 45  | 6.61   |   |
| 8892 | Zfp777          | -1.22 | 97  | 10.12  | 111 | 8.3    |   |
| 8893 | Ggcx            | -1.22 | 226 | 18.55  | 263 | 15.21  |   |
| 8894 | Bet1            | -1.22 | 60  | 12.42  | 74  | 10.18  |   |
| 8895 | Txnrd1          | -1.22 | 258 | 23.12  | 319 | 18.94  |   |
| 8896 | Tubgcp2         | -1.22 | 295 | 32.16  | 311 | 26.34  |   |
| 8897 | B3gnt2          | -1.22 | 151 | 16.78  | 169 | 13.75  |   |

Supplemental Table 3  
 FSH + Ad-E versus FSH + Ad-FOXO1(A3), 24 hours

|      | A            | B     | C   | D     | E   | F     | G |
|------|--------------|-------|-----|-------|-----|-------|---|
| 8898 | Lman2        | -1.22 | 372 | 68.18 | 412 | 55.84 |   |
| 8899 | Atmin_1      | -1.22 | 15  | 3.12  | 16  | 2.55  |   |
| 8900 | Hirip3       | -1.22 | 46  | 6.93  | 52  | 5.68  |   |
| 8901 | LOC100911363 | -1.22 | 0   | 73.01 | 0   | 59.78 |   |
| 8902 | Lysmd4       | -1.22 | 30  | 5.77  | 29  | 4.72  |   |
| 8903 | Nlgn3        | -1.22 | 24  | 1.91  | 25  | 1.57  |   |
| 8904 | RGD1563482   | -1.22 | 45  | 2.11  | 59  | 1.73  |   |
| 8905 | Sh3bgrl3     | -1.22 | 65  | 30.21 | 69  | 24.74 |   |
| 8906 | RragB_2      | -1.22 | 0   | 1.93  | 0   | 1.58  |   |
| 8907 | Serac1       | -1.22 | 36  | 4.1   | 47  | 3.36  |   |
| 8908 | Syvn1        | -1.22 | 360 | 25.59 | 404 | 20.95 |   |
| 8909 | Rfx1         | -1.22 | 125 | 8.28  | 136 | 6.77  |   |
| 8910 | Tyk2         | -1.22 | 116 | 6.8   | 135 | 5.57  |   |
| 8911 | Smad3        | -1.22 | 711 | 41.84 | 842 | 34.23 |   |
| 8912 | Bcap31       | -1.22 | 203 | 54.27 | 255 | 44.4  |   |
| 8913 | LOC361985    | -1.22 | 193 | 35.85 | 215 | 29.33 |   |
| 8914 | Nbl1         | -1.22 | 274 | 53.45 | 308 | 43.73 |   |
| 8915 | Slc41a2      | -1.22 | 69  | 4.29  | 87  | 3.51  |   |
| 8916 | Unc5b        | -1.22 | 615 | 37.64 | 702 | 30.79 |   |
| 8917 | Dnal1        | -1.22 | 151 | 4.06  | 175 | 3.32  |   |
| 8918 | RT1-CE16     | -1.22 | 26  | 21.28 | 32  | 17.4  |   |
| 8919 | Atmin_2      | -1.22 | 103 | 12.22 | 111 | 10    |   |
| 8920 | Mtg2         | -1.22 | 117 | 12.69 | 148 | 10.38 |   |
| 8921 | Phactr4      | -1.22 | 110 | 6.89  | 108 | 5.63  |   |
| 8922 | Polh         | -1.22 | 43  | 3.64  | 53  | 2.98  |   |
| 8923 | Tmem186      | -1.22 | 36  | 5.67  | 40  | 4.64  |   |
| 8924 | Tmem214      | -1.22 | 211 | 19.65 | 228 | 16.06 |   |
| 8925 | R3hdm4       | -1.22 | 89  | 33.42 | 76  | 27.32 |   |
| 8926 | Gosr2        | -1.22 | 215 | 33.69 | 250 | 27.54 |   |
| 8927 | Bax          | -1.22 | 43  | 12.19 | 57  | 9.96  |   |
| 8928 | Pkn1         | -1.22 | 215 | 20.17 | 246 | 16.49 |   |
| 8929 | Pex26        | -1.22 | 60  | 4.79  | 64  | 3.91  |   |
| 8930 | Cpsf3l       | -1.22 | 87  | 9.86  | 107 | 8.06  |   |
| 8931 | Ermp1        | -1.22 | 439 | 29.25 | 503 | 23.89 |   |
| 8932 | Xylt1        | -1.22 | 268 | 30.06 | 279 | 24.55 |   |
| 8933 | RGD1311744   | -1.22 | 96  | 8.77  | 103 | 7.16  |   |
| 8934 | Mbtps1       | -1.23 | 760 | 57.63 | 869 | 47.04 |   |
| 8935 | Tex261       | -1.23 | 124 | 41.66 | 139 | 34    |   |
| 8936 | Tspan3       | -1.23 | 385 | 83.23 | 428 | 67.92 |   |
| 8937 | Pes1         | -1.23 | 192 | 32.36 | 211 | 26.41 |   |
| 8938 | Dpp7         | -1.23 | 218 | 44.17 | 241 | 36.04 |   |
| 8939 | Arid3a       | -1.23 | 9   | 0.88  | 6   | 0.72  |   |
| 8940 | Cgrrf1       | -1.23 | 51  | 6.02  | 67  | 4.91  |   |
| 8941 | Eid1         | -1.23 | 0   | 4.63  | 0   | 3.78  |   |
| 8942 | Hells        | -1.23 | 0   | 0.78  | 0   | 0.63  |   |
| 8943 | Kihl25       | -1.23 | 103 | 9.73  | 125 | 7.93  |   |
| 8944 | Lmo7         | -1.23 | 21  | 0.77  | 13  | 0.63  |   |
| 8945 | LOC100909688 | -1.23 | 10  | 2.44  | 15  | 1.99  |   |
| 8946 | Ribc1        | -1.23 | 22  | 2.8   | 24  | 2.29  |   |
| 8947 | Ssbp2        | -1.23 | 206 | 21.23 | 298 | 17.31 |   |
| 8948 | Tmem121      | -1.23 | 11  | 4.16  | 12  | 3.39  |   |
| 8949 | Cdk2ap2      | -1.23 | 78  | 26.58 | 87  | 21.68 |   |
| 8950 | Cops7a       | -1.23 | 193 | 29.85 | 223 | 24.34 |   |
| 8951 | Dnajc28      | -1.23 | 11  | 2.82  | 12  | 2.3   |   |

Supplemental Table 3  
 FSH + Ad-E versus FSH + Ad-FOXO1(A3), 24 hours

|      | A              | B     | C    | D      | E    | F      | G |
|------|----------------|-------|------|--------|------|--------|---|
| 8952 | Guk1           | -1.23 | 96   | 33.5   | 108  | 27.33  |   |
| 8953 | LOC100912455   | -1.23 | 0    | 1.31   | 0    | 1.07   |   |
| 8954 | Med26          | -1.23 | 61   | 3.1    | 73   | 2.53   |   |
| 8955 | Mlycd          | -1.23 | 102  | 11.63  | 119  | 9.48   |   |
| 8956 | Sephs2         | -1.23 | 68   | 10.34  | 76   | 8.43   |   |
| 8957 | Ptprs          | -1.23 | 968  | 53.2   | 1063 | 43.38  |   |
| 8958 | M6pr           | -1.23 | 271  | 73.97  | 289  | 60.3   |   |
| 8959 | Vipas39        | -1.23 | 196  | 21.68  | 211  | 17.67  |   |
| 8960 | Dhx8           | -1.23 | 158  | 11.54  | 190  | 9.4    |   |
| 8961 | LOC688176      | -1.23 | 71   | 10.36  | 80   | 8.44   |   |
| 8962 | Ormdl2         | -1.23 | 75   | 22.93  | 86   | 18.68  |   |
| 8963 | Tmbim6         | -1.23 | 696  | 115.75 | 934  | 94.29  |   |
| 8964 | Rcan1          | -1.23 | 66   | 9.4    | 67   | 7.66   |   |
| 8965 | Casd1          | -1.23 | 77   | 8.51   | 94   | 6.93   |   |
| 8966 | Chst15         | -1.23 | 157  | 10.43  | 168  | 8.5    |   |
| 8967 | Cdk16          | -1.23 | 589  | 65.5   | 640  | 53.32  |   |
| 8968 | Mvb12b         | -1.23 | 254  | 16.5   | 277  | 13.43  |   |
| 8969 | Acp6           | -1.23 | 96   | 18.03  | 109  | 14.68  |   |
| 8970 | Eef2           | -1.23 | 4399 | 546.39 | 4797 | 444.69 |   |
| 8971 | Zfp236         | -1.23 | 136  | 6.99   | 178  | 5.69   |   |
| 8972 | Map3k12        | -1.23 | 165  | 14.36  | 173  | 11.68  |   |
| 8973 | Iqgap2         | -1.23 | 129  | 3.3    | 205  | 2.68   |   |
| 8974 | Pabpn1         | -1.23 | 451  | 71.64  | 462  | 58.28  |   |
| 8975 | Gatb           | -1.23 | 77   | 10.93  | 98   | 8.88   |   |
| 8976 | Spata6         | -1.23 | 75   | 8.65   | 86   | 7.03   |   |
| 8977 | Itm2b          | -1.23 | 4686 | 927.35 | 5304 | 754.08 |   |
| 8978 | Ptdss2         | -1.23 | 230  | 18.32  | 269  | 14.89  |   |
| 8979 | Gpt2           | -1.23 | 44   | 2.5    | 56   | 2.03   |   |
| 8980 | Dlgap1         | -1.23 | 149  | 1.68   | 227  | 1.37   |   |
| 8981 | Faah_2         | -1.23 | 8    | 2.33   | 12   | 1.89   |   |
| 8982 | LOC100361087   | -1.23 | 66   | 3.49   | 101  | 2.84   |   |
| 8983 | AABR07036019.1 | -1.23 | 27   | 2.47   | 26   | 2.01   |   |
| 8984 | Pitpnm1        | -1.23 | 100  | 8      | 104  | 6.5    |   |
| 8985 | Tmem138        | -1.23 | 27   | 5.35   | 35   | 4.35   |   |
| 8986 | Dgcr8          | -1.23 | 172  | 11.09  | 217  | 9.01   |   |
| 8987 | Capns1         | -1.23 | 0    | 42.42  | 0    | 34.45  |   |
| 8988 | Mief2          | -1.23 | 62   | 11.16  | 69   | 9.06   |   |
| 8989 | Hif1a          | -1.23 | 957  | 82.68  | 1050 | 67.11  |   |
| 8990 | LOC690251      | -1.23 | 0    | 5.62   | 0    | 4.57   |   |
| 8991 | Stat5b         | -1.23 | 122  | 14.22  | 158  | 11.54  |   |
| 8992 | Srsf5          | -1.23 | 650  | 115.06 | 698  | 93.37  |   |
| 8993 | Zfp512b        | -1.23 | 311  | 19.4   | 348  | 15.74  |   |
| 8994 | Szrd1          | -1.23 | 375  | 36.6   | 444  | 29.69  |   |
| 8995 | Sumo3          | -1.23 | 235  | 48.92  | 252  | 39.68  |   |
| 8996 | Mdm2           | -1.23 | 198  | 20.39  | 242  | 16.54  |   |
| 8997 | Tbc1d30        | -1.23 | 81   | 9.38   | 100  | 7.61   |   |
| 8998 | Apbb3          | -1.23 | 78   | 10.65  | 87   | 8.63   |   |
| 8999 | Cdc42bpg       | -1.23 | 75   | 4.31   | 81   | 3.49   |   |
| 9000 | Cops8          | -1.23 | 152  | 35     | 174  | 28.38  |   |
| 9001 | Dcaf11         | -1.23 | 181  | 19.52  | 209  | 15.83  |   |
| 9002 | LOC100910447   | -1.23 | 136  | 43.58  | 160  | 35.32  |   |
| 9003 | Nus1           | -1.23 | 151  | 14.21  | 173  | 11.51  |   |
| 9004 | Atp5c1         | -1.23 | 431  | 16.48  | 485  | 13.35  |   |
| 9005 | Ccnd2          | -1.23 | 829  | 177.71 | 892  | 143.96 |   |

Supplemental Table 3  
 FSH + Ad-E versus FSH + Ad-FOXO1(A3), 24 hours

|      | A              | B     | C    | D      | E    | F      | G |
|------|----------------|-------|------|--------|------|--------|---|
| 9006 | AABR07062512.1 | -1.23 | 17   | 2.92   | 24   | 2.36   |   |
| 9007 | Ankrd32        | -1.23 | 44   | 2.32   | 50   | 1.88   |   |
| 9008 | Card14         | -1.23 | 85   | 1.45   | 106  | 1.18   |   |
| 9009 | Csmd3          | -1.23 | 36   | 0.47   | 39   | 0.38   |   |
| 9010 | Dennd6b        | -1.23 | 37   | 3.26   | 40   | 2.64   |   |
| 9011 | Fam184a        | -1.23 | 53   | 2.49   | 83   | 2.02   |   |
| 9012 | LOC102552705   | -1.23 | 11   | 1.83   | 12   | 1.48   |   |
| 9013 | LOC500956      | -1.23 | 14   | 2.72   | 19   | 2.2    |   |
| 9014 | Mrps30         | -1.23 | 47   | 8.79   | 58   | 7.12   |   |
| 9015 | Orai1          | -1.23 | 57   | 11.62  | 56   | 9.41   |   |
| 9016 | RGD1304810     | -1.23 | 35   | 1.74   | 53   | 1.41   |   |
| 9017 | Spc25          | -1.23 | 17   | 3.47   | 14   | 2.81   |   |
| 9018 | Srrd           | -1.23 | 23   | 5.86   | 17   | 4.75   |   |
| 9019 | Stambpl1       | -1.23 | 28   | 2.33   | 28   | 1.88   |   |
| 9020 | Zfp563         | -1.23 | 12   | 3.23   | 13   | 2.62   |   |
| 9021 | AC098462.2     | -1.23 | 0    | 2.32   | 0    | 1.88   |   |
| 9022 | Dhx34          | -1.23 | 65   | 5.58   | 72   | 4.52   |   |
| 9023 | Myh9           | -1.23 | 0    | 0.7    | 0    | 0.57   |   |
| 9024 | Pde1a          | -1.23 | 109  | 13.45  | 129  | 10.89  |   |
| 9025 | Ppp1r37        | -1.23 | 173  | 19.26  | 206  | 15.6   |   |
| 9026 | Rad1           | -1.23 | 13   | 3.19   | 12   | 2.58   |   |
| 9027 | Rhbdd1         | -1.23 | 111  | 8.86   | 143  | 7.17   |   |
| 9028 | Mlec           | -1.24 | 1127 | 25.79  | 1177 | 20.87  |   |
| 9029 | Adrbk1         | -1.24 | 160  | 23.6   | 174  | 19.1   |   |
| 9030 | Tuba1a         | -1.24 | 1373 | 985.22 | 1313 | 797.01 |   |
| 9031 | Sec13          | -1.24 | 123  | 31.43  | 141  | 25.42  |   |
| 9032 | Sf3b3          | -1.24 | 625  | 47.17  | 684  | 38.15  |   |
| 9033 | Tbc1d10b       | -1.24 | 170  | 15.44  | 200  | 12.49  |   |
| 9034 | Plat           | -1.24 | 34   | 6.98   | 38   | 5.64   |   |
| 9035 | Ttc23          | -1.24 | 102  | 8.53   | 122  | 6.9    |   |
| 9036 | Adamts1        | -1.24 | 440  | 36.37  | 481  | 29.41  |   |
| 9037 | Atp6v0a2       | -1.24 | 281  | 11.5   | 302  | 9.3    |   |
| 9038 | Suclg1         | -1.24 | 244  | 33.95  | 280  | 27.45  |   |
| 9039 | Fopnl          | -1.24 | 83   | 18.41  | 105  | 14.88  |   |
| 9040 | Grwd1          | -1.24 | 76   | 13.32  | 88   | 10.76  |   |
| 9041 | Pnkp           | -1.24 | 41   | 7      | 50   | 5.66   |   |
| 9042 | Zfp653         | -1.24 | 59   | 6.22   | 63   | 5.02   |   |
| 9043 | Arhgap44       | -1.24 | 72   | 5.18   | 91   | 4.19   |   |
| 9044 | Pspc1          | -1.24 | 260  | 12.36  | 321  | 9.99   |   |
| 9045 | Cxadr          | -1.24 | 374  | 22.21  | 547  | 17.95  |   |
| 9046 | Capn15         | -1.24 | 76   | 4.31   | 94   | 3.48   |   |
| 9047 | Cnpy4          | -1.24 | 89   | 20.82  | 97   | 16.82  |   |
| 9048 | Atp2a2         | -1.24 | 1104 | 56.61  | 1227 | 45.71  |   |
| 9049 | Cuedc1         | -1.24 | 41   | 5.07   | 39   | 4.1    |   |
| 9050 | Erc2           | -1.24 | 63   | 7.62   | 62   | 6.15   |   |
| 9051 | Lrrc4c         | -1.24 | 45   | 3.22   | 76   | 2.6    |   |
| 9052 | Rnf168         | -1.24 | 63   | 5.48   | 73   | 4.43   |   |
| 9053 | Trappc6a       | -1.24 | 45   | 9.38   | 37   | 7.57   |   |
| 9054 | Cyhr1          | -1.24 | 358  | 13.8   | 419  | 11.14  |   |
| 9055 | Stk11ip        | -1.24 | 163  | 11.79  | 182  | 9.51   |   |
| 9056 | Naa35          | -1.24 | 288  | 35.11  | 326  | 28.33  |   |
| 9057 | Sirt3          | -1.24 | 101  | 16.49  | 135  | 13.31  |   |
| 9058 | Fcf1           | -1.24 | 86   | 32.77  | 98   | 26.45  |   |
| 9059 | Dynll1         | -1.24 | 222  | 133.28 | 245  | 107.53 |   |



Supplemental Table 3  
 FSH + Ad-E versus FSH + Ad-FOXO1(A3), 24 hours

|      | A            | B     | C    | D      | E    | F      | G |
|------|--------------|-------|------|--------|------|--------|---|
| 9060 | Fam126a      | -1.24 | 267  | 5.33   | 216  | 4.3    |   |
| 9061 | Mafg         | -1.24 | 148  | 17.21  | 182  | 13.88  |   |
| 9062 | Ncstn        | -1.24 | 940  | 114.27 | 1013 | 92.16  |   |
| 9063 | Chmp1a       | -1.24 | 211  | 30.75  | 234  | 24.8   |   |
| 9064 | Ercc3        | -1.24 | 153  | 19     | 165  | 15.32  |   |
| 9065 | Pdik1l       | -1.24 | 58   | 4.11   | 64   | 3.32   |   |
| 9066 | Atp8b2       | -1.24 | 587  | 37.54  | 640  | 30.27  |   |
| 9067 | Dennd4b      | -1.24 | 135  | 8.8    | 135  | 7.09   |   |
| 9068 | Slc27a4      | -1.24 | 136  | 15.11  | 152  | 12.18  |   |
| 9069 | Socs7        | -1.24 | 102  | 13.36  | 112  | 10.77  |   |
| 9070 | Fermt1       | -1.24 | 83   | 5.55   | 85   | 4.48   |   |
| 9071 | Dtymk        | -1.24 | 163  | 26.79  | 165  | 21.59  |   |
| 9072 | Adck5        | -1.24 | 419  | 36.27  | 439  | 29.22  |   |
| 9073 | RT1-A1       | -1.24 | 161  | 24.06  | 153  | 19.38  |   |
| 9074 | Calcr1       | -1.24 | 119  | 8.01   | 134  | 6.45   |   |
| 9075 | Cdkn1c       | -1.24 | 13   | 2.31   | 14   | 1.86   |   |
| 9076 | Dnajc25      | -1.24 | 33   | 7.41   | 35   | 5.97   |   |
| 9077 | Rhno1        | -1.24 | 40   | 19.94  | 42   | 16.06  |   |
| 9078 | Rita1        | -1.24 | 13   | 3.69   | 15   | 2.97   |   |
| 9079 | Sema4d       | -1.24 | 90   | 5.69   | 113  | 4.58   |   |
| 9080 | Zfyve19      | -1.24 | 38   | 6.02   | 42   | 4.85   |   |
| 9081 | Fam53a       | -1.24 | 78   | 4.44   | 88   | 3.58   |   |
| 9082 | Ganc         | -1.24 | 66   | 2.93   | 75   | 2.36   |   |
| 9083 | Has3         | -1.24 | 20   | 0.68   | 24   | 0.54   |   |
| 9084 | Micu1        | -1.24 | 180  | 20.17  | 195  | 16.24  |   |
| 9085 | Myg1         | -1.24 | 92   | 24.3   | 111  | 19.57  |   |
| 9086 | Nfkbib       | -1.24 | 28   | 6.73   | 30   | 5.42   |   |
| 9087 | Rfxap_1      | -1.24 | 0    | 5.75   | 0    | 4.63   |   |
| 9088 | Rpusd1       | -1.24 | 30   | 5.04   | 31   | 4.06   |   |
| 9089 | Serp1        | -1.24 | 310  | 46.56  | 336  | 37.49  |   |
| 9090 | Ube2e2       | -1.24 | 18   | 6.47   | 23   | 5.21   |   |
| 9091 | Kcnk3        | -1.24 | 17   | 1.02   | 16   | 0.82   |   |
| 9092 | Ptk7         | -1.24 | 394  | 48.49  | 403  | 39.03  |   |
| 9093 | Rpl23a       | -1.24 | 121  | 184.24 | 156  | 148.3  |   |
| 9094 | Park7        | -1.24 | 181  | 25.89  | 198  | 20.83  |   |
| 9095 | Eif4a1       | -1.24 | 1201 | 313.18 | 1199 | 252.03 |   |
| 9096 | Nob1         | -1.24 | 181  | 34.1   | 188  | 27.44  |   |
| 9097 | Nck2         | -1.24 | 238  | 18.74  | 303  | 15.08  |   |
| 9098 | Lrch4        | -1.24 | 119  | 12.43  | 127  | 10     |   |
| 9099 | Tti1         | -1.24 | 150  | 8.76   | 198  | 7.05   |   |
| 9100 | Mrps5        | -1.24 | 76   | 10.05  | 81   | 8.08   |   |
| 9101 | Rilpl1       | -1.24 | 167  | 17.01  | 176  | 13.68  |   |
| 9102 | Ccdc137      | -1.24 | 61   | 6.28   | 69   | 5.05   |   |
| 9103 | Mboat2       | -1.24 | 93   | 6.76   | 94   | 5.44   |   |
| 9104 | LOC498435    | -1.24 | 44   | 8.5    | 45   | 6.83   |   |
| 9105 | LOC102552166 | -1.24 | 25   | 4.47   | 19   | 3.6    |   |
| 9106 | Tmub2        | -1.24 | 102  | 13.4   | 120  | 10.77  |   |
| 9107 | Raver1       | -1.24 | 333  | 32.48  | 361  | 26.09  |   |
| 9108 | Gnl1         | -1.24 | 126  | 8.14   | 138  | 6.54   |   |
| 9109 | Ccdc127      | -1.25 | 29   | 7.79   | 31   | 6.26   |   |
| 9110 | Ndufaf1      | -1.25 | 31   | 5.13   | 30   | 4.12   |   |
| 9111 | Plxnd1       | -1.25 | 65   | 3.2    | 71   | 2.57   |   |
| 9112 | Vti1b        | -1.25 | 42   | 8.43   | 50   | 6.77   |   |
| 9113 | Bcl2l12      | -1.25 | 54   | 5.78   | 54   | 4.64   |   |

Supplemental Table 3  
 FSH + Ad-E versus FSH + Ad-FOXO1(A3), 24 hours

|      | A          | B     | C    | D     | E    | F     | G |
|------|------------|-------|------|-------|------|-------|---|
| 9114 | Dgka       | -1.25 | 78   | 6.44  | 92   | 5.17  |   |
| 9115 | Psenen     | -1.25 | 85   | 55.13 | 92   | 44.27 |   |
| 9116 | Sdf2l1     | -1.25 | 29   | 9.19  | 29   | 7.38  |   |
| 9117 | Man1b1     | -1.25 | 408  | 37.32 | 452  | 29.96 |   |
| 9118 | Dgat1      | -1.25 | 90   | 14.09 | 101  | 11.31 |   |
| 9119 | Dzip1      | -1.25 | 193  | 21.67 | 203  | 17.39 |   |
| 9120 | Plcb4      | -1.25 | 227  | 8.26  | 243  | 6.63  |   |
| 9121 | Mrc2       | -1.25 | 418  | 24.13 | 445  | 19.36 |   |
| 9122 | Ercc4      | -1.25 | 35   | 7.23  | 37   | 5.8   |   |
| 9123 | Tmem132a   | -1.25 | 394  | 40.89 | 435  | 32.79 |   |
| 9124 | Dpp3       | -1.25 | 277  | 34.43 | 308  | 27.61 |   |
| 9125 | Zscan21    | -1.25 | 171  | 20.41 | 205  | 16.36 |   |
| 9126 | Fbxo46     | -1.25 | 96   | 8.55  | 119  | 6.86  |   |
| 9127 | Cirh1a     | -1.25 | 165  | 24.34 | 182  | 19.51 |   |
| 9128 | Prkab1     | -1.25 | 109  | 14.62 | 118  | 11.72 |   |
| 9129 | Vps18      | -1.25 | 102  | 9.02  | 117  | 7.23  |   |
| 9130 | Srebf2     | -1.25 | 836  | 53.14 | 911  | 42.59 |   |
| 9131 | Spty2d1    | -1.25 | 152  | 11.2  | 162  | 8.98  |   |
| 9132 | Atg10      | -1.25 | 65   | 3.19  | 104  | 2.55  |   |
| 9133 | Atg4b      | -1.25 | 120  | 17.4  | 137  | 13.93 |   |
| 9134 | Bora       | -1.25 | 33   | 2.22  | 46   | 1.78  |   |
| 9135 | Mtcl1      | -1.25 | 261  | 9.59  | 310  | 7.68  |   |
| 9136 | Ndufa9     | -1.25 | 230  | 52.68 | 273  | 42.19 |   |
| 9137 | Prkd2      | -1.25 | 53   | 4.82  | 72   | 3.86  |   |
| 9138 | RGD1565784 | -1.25 | 28   | 5.89  | 32   | 4.72  |   |
| 9139 | Shcbp1     | -1.25 | 17   | 2.55  | 19   | 2.04  |   |
| 9140 | Ttc38      | -1.25 | 29   | 2.53  | 32   | 2.03  |   |
| 9141 | Wdr45      | -1.25 | 51   | 7.87  | 60   | 6.3   |   |
| 9142 | Zfp788     | -1.25 | 28   | 3.67  | 30   | 2.94  |   |
| 9143 | Dpf3       | -1.25 | 106  | 8.18  | 127  | 6.55  |   |
| 9144 | LOC688452  | -1.25 | 107  | 4.56  | 118  | 3.65  |   |
| 9145 | Samd1      | -1.25 | 71   | 17.64 | 76   | 14.13 |   |
| 9146 | Dnajb12    | -1.25 | 204  | 24.1  | 234  | 19.29 |   |
| 9147 | Ppat       | -1.25 | 110  | 7.63  | 123  | 6.1   |   |
| 9148 | Cachd1     | -1.25 | 96   | 8.64  | 110  | 6.91  |   |
| 9149 | Lamc1      | -1.25 | 709  | 31.01 | 780  | 24.81 |   |
| 9150 | Mmp23      | -1.25 | 194  | 35.95 | 206  | 28.77 |   |
| 9151 | Cers6      | -1.25 | 128  | 10.3  | 159  | 8.24  |   |
| 9152 | Mrpl23     | -1.25 | 72   | 38.22 | 73   | 30.58 |   |
| 9153 | Sar1b      | -1.25 | 128  | 28.64 | 169  | 22.91 |   |
| 9154 | Fastk      | -1.25 | 143  | 22.5  | 158  | 18    |   |
| 9155 | Cacybp     | -1.25 | 90   | 14.08 | 103  | 11.26 |   |
| 9156 | Clk3       | -1.25 | 183  | 25.47 | 220  | 20.37 |   |
| 9157 | Rpap1      | -1.25 | 125  | 8.65  | 149  | 6.91  |   |
| 9158 | Cep76      | -1.25 | 59   | 3.12  | 68   | 2.5   |   |
| 9159 | Coq9       | -1.25 | 128  | 24.63 | 152  | 19.69 |   |
| 9160 | Mcts1      | -1.25 | 70   | 7.34  | 77   | 5.87  |   |
| 9161 | Nipal2     | -1.25 | 41   | 4.77  | 55   | 3.81  |   |
| 9162 | Pibf1      | -1.25 | 99   | 4.12  | 129  | 3.3   |   |
| 9163 | ldh3a      | -1.25 | 185  | 25.61 | 202  | 20.47 |   |
| 9164 | Mrpl16     | -1.25 | 35   | 9.14  | 49   | 7.3   |   |
| 9165 | Fbl        | -1.25 | 124  | 40.16 | 127  | 32.09 |   |
| 9166 | Uhrf1bp1l  | -1.25 | 293  | 20.17 | 304  | 16.11 |   |
| 9167 | Aco2       | -1.25 | 1100 | 59.74 | 1202 | 47.71 |   |

Supplemental Table 3  
 FSH + Ad-E versus FSH + Ad-FOXO1(A3), 24 hours

|      | A          | B     | C    | D      | E    | F      | G |
|------|------------|-------|------|--------|------|--------|---|
| 9168 | Fxr2       | -1.25 | 450  | 52.92  | 489  | 42.26  |   |
| 9169 | Xpnpep1    | -1.25 | 379  | 47.05  | 404  | 37.56  |   |
| 9170 | Ppp3ca     | -1.25 | 323  | 27.55  | 436  | 22     |   |
| 9171 | Kif7       | -1.25 | 70   | 5.31   | 79   | 4.24   |   |
| 9172 | Atp5l      | -1.25 | 143  | 100.95 | 152  | 80.58  |   |
| 9173 | Vars       | -1.25 | 267  | 22.88  | 286  | 18.26  |   |
| 9174 | March6     | -1.25 | 287  | 29.29  | 312  | 23.37  |   |
| 9175 | Mllt10     | -1.25 | 239  | 16.52  | 297  | 13.18  |   |
| 9176 | Atg4c      | -1.25 | 35   | 3.97   | 46   | 3.17   |   |
| 9177 | Dnajb14    | -1.25 | 112  | 5.76   | 161  | 4.59   |   |
| 9178 | Dusp11_1   | -1.25 | 0    | 4.23   | 0    | 3.38   |   |
| 9179 | Fadd       | -1.25 | 15   | 4.09   | 16   | 3.26   |   |
| 9180 | Nudt13     | -1.25 | 21   | 2.13   | 27   | 1.7    |   |
| 9181 | Proser3    | -1.25 | 100  | 9.26   | 114  | 7.38   |   |
| 9182 | RGD1307947 | -1.25 | 13   | 2.27   | 20   | 1.81   |   |
| 9183 | Rnf122     | -1.25 | 89   | 17.06  | 93   | 13.6   |   |
| 9184 | Slirp      | -1.25 | 21   | 1.93   | 19   | 1.54   |   |
| 9185 | Trim47     | -1.25 | 17   | 2.47   | 21   | 1.97   |   |
| 9186 | Impdh2     | -1.25 | 203  | 43.08  | 218  | 34.35  |   |
| 9187 | Pcdhgb6    | -1.25 | 28   | 4.49   | 29   | 3.58   |   |
| 9188 | Hsd17b10   | -1.25 | 79   | 64.56  | 88   | 51.46  |   |
| 9189 | Ranbp3     | -1.25 | 199  | 29.42  | 221  | 23.45  |   |
| 9190 | Mt2A       | -1.26 | 26   | 72.03  | 29   | 57.4   |   |
| 9191 | Ndufs2     | -1.26 | 303  | 65.11  | 330  | 51.88  |   |
| 9192 | Maged1     | -1.26 | 1369 | 148.32 | 1468 | 118.17 |   |
| 9193 | Cdkn1b     | -1.26 | 177  | 28.26  | 197  | 22.52  |   |
| 9194 | Nop16      | -1.26 | 65   | 18.37  | 73   | 14.64  |   |
| 9195 | Wdr18      | -1.26 | 44   | 15.95  | 40   | 12.7   |   |
| 9196 | Mum1       | -1.26 | 145  | 16     | 143  | 12.75  |   |
| 9197 | Srsf3      | -1.26 | 558  | 63.69  | 547  | 50.73  |   |
| 9198 | Uxs1       | -1.26 | 344  | 40.56  | 401  | 32.3   |   |
| 9199 | Nat10      | -1.26 | 84   | 6.93   | 89   | 5.52   |   |
| 9200 | Ogdh       | -1.26 | 276  | 45.17  | 263  | 35.96  |   |
| 9201 | Hyou1      | -1.26 | 1343 | 104.08 | 1431 | 82.84  |   |
| 9202 | Rpp21      | -1.26 | 33   | 9.72   | 34   | 7.73   |   |
| 9203 | Edc3       | -1.26 | 90   | 11.85  | 113  | 9.43   |   |
| 9204 | Pnma2      | -1.26 | 64   | 6.75   | 65   | 5.37   |   |
| 9205 | Pxmp4      | -1.26 | 35   | 8.17   | 38   | 6.5    |   |
| 9206 | Schip1     | -1.26 | 58   | 5.04   | 101  | 4.01   |   |
| 9207 | Wdr70      | -1.26 | 90   | 5.26   | 116  | 4.18   |   |
| 9208 | Chd9       | -1.26 | 340  | 9.59   | 368  | 7.63   |   |
| 9209 | Atg14      | -1.26 | 80   | 6.54   | 85   | 5.2    |   |
| 9210 | Sap130     | -1.26 | 343  | 23.48  | 390  | 18.67  |   |
| 9211 | Cul7       | -1.26 | 159  | 15.85  | 174  | 12.6   |   |
| 9212 | Clstn2     | -1.26 | 49   | 2.12   | 56   | 1.69   |   |
| 9213 | Itpr1p1    | -1.26 | 16   | 3.09   | 17   | 2.45   |   |
| 9214 | Myrip      | -1.26 | 87   | 3.74   | 72   | 2.97   |   |
| 9215 | Plekhg5    | -1.26 | 38   | 2.88   | 51   | 2.28   |   |
| 9216 | Tmem134    | -1.26 | 86   | 25.49  | 90   | 20.25  |   |
| 9217 | Dgcr6      | -1.26 | 26   | 3.84   | 29   | 3.05   |   |
| 9218 | Gorasp1    | -1.26 | 66   | 9.31   | 70   | 7.39   |   |
| 9219 | Msr2       | -1.26 | 32   | 5.05   | 46   | 4.01   |   |
| 9220 | Pex14      | -1.26 | 149  | 18.27  | 173  | 14.51  |   |
| 9221 | Ap3m1      | -1.26 | 196  | 20.29  | 251  | 16.11  |   |

Supplemental Table 3  
 FSH + Ad-E versus FSH + Ad-FOXO1(A3), 24 hours

|      | A              | B     | C   | D      | E   | F      | G |
|------|----------------|-------|-----|--------|-----|--------|---|
| 9222 | Usp7           | -1.26 | 420 | 39.62  | 470 | 31.45  |   |
| 9223 | Trappc4        | -1.26 | 70  | 17.34  | 70  | 13.76  |   |
| 9224 | Cpped1         | -1.26 | 84  | 8.57   | 85  | 6.8    |   |
| 9225 | Cdk5           | -1.26 | 57  | 8.38   | 62  | 6.65   |   |
| 9226 | Tomm7          | -1.26 | 49  | 47.18  | 53  | 37.44  |   |
| 9227 | LOC100910540   | -1.26 | 9   | 9.57   | 8   | 7.59   |   |
| 9228 | Rnf213         | -1.26 | 392 | 8.11   | 433 | 6.43   |   |
| 9229 | Rcl1           | -1.26 | 39  | 4.79   | 46  | 3.8    |   |
| 9230 | Kxd1           | -1.26 | 105 | 20.06  | 125 | 15.91  |   |
| 9231 | Tmem231        | -1.26 | 33  | 3.79   | 40  | 3.01   |   |
| 9232 | Hes6           | -1.26 | 70  | 16.88  | 71  | 13.38  |   |
| 9233 | Cct5           | -1.26 | 600 | 120.41 | 650 | 95.46  |   |
| 9234 | Ing4           | -1.26 | 184 | 37.82  | 224 | 29.98  |   |
| 9235 | Rbmx1          | -1.26 | 114 | 52     | 127 | 41.22  |   |
| 9236 | Ntan1          | -1.26 | 60  | 14.19  | 72  | 11.24  |   |
| 9237 | Atp5h          | -1.26 | 118 | 53.35  | 119 | 42.27  |   |
| 9238 | Pgrmc1         | -1.26 | 216 | 52.45  | 254 | 41.55  |   |
| 9239 | Cpt2           | -1.26 | 120 | 17.79  | 131 | 14.09  |   |
| 9240 | H2afy2         | -1.26 | 192 | 25.39  | 192 | 20.11  |   |
| 9241 | Ube2s          | -1.26 | 405 | 161.51 | 432 | 127.91 |   |
| 9242 | Kif5b          | -1.26 | 757 | 77.04  | 785 | 61     |   |
| 9243 | Pcnx13         | -1.26 | 431 | 24.15  | 465 | 19.12  |   |
| 9244 | Gemin4         | -1.26 | 120 | 12.72  | 127 | 10.07  |   |
| 9245 | Metap1d        | -1.26 | 64  | 1.92   | 80  | 1.52   |   |
| 9246 | Mphosph8       | -1.26 | 11  | 9.37   | 7   | 7.42   |   |
| 9247 | Pop5           | -1.26 | 18  | 4.28   | 23  | 3.39   |   |
| 9248 | Pus7           | -1.26 | 49  | 5.01   | 54  | 3.97   |   |
| 9249 | Rabep2         | -1.26 | 81  | 9.12   | 94  | 7.22   |   |
| 9250 | RGD1565059     | -1.26 | 22  | 3.98   | 32  | 3.15   |   |
| 9251 | Rbmx2          | -1.26 | 16  | 3.55   | 21  | 2.81   |   |
| 9252 | Pygo2          | -1.26 | 235 | 29.45  | 249 | 23.3   |   |
| 9253 | Pkp4           | -1.26 | 86  | 5.66   | 96  | 4.47   |   |
| 9254 | Wdr35          | -1.26 | 79  | 5.96   | 88  | 4.71   |   |
| 9255 | Sepr1          | -1.27 | 165 | 40.14  | 182 | 31.73  |   |
| 9256 | Dnpep          | -1.27 | 283 | 57.6   | 297 | 45.53  |   |
| 9257 | Banp           | -1.27 | 168 | 12.07  | 209 | 9.54   |   |
| 9258 | Pcna           | -1.27 | 192 | 60.24  | 215 | 47.6   |   |
| 9259 | Dpp9           | -1.27 | 280 | 26.66  | 308 | 21.07  |   |
| 9260 | Pcyox1l        | -1.27 | 148 | 23.15  | 177 | 18.29  |   |
| 9261 | Phldb1         | -1.27 | 690 | 38.56  | 751 | 30.45  |   |
| 9262 | Slc25a11       | -1.27 | 110 | 32.1   | 116 | 25.34  |   |
| 9263 | Nfyc           | -1.27 | 315 | 28.99  | 359 | 22.88  |   |
| 9264 | Ppp1cc         | -1.27 | 575 | 72.18  | 620 | 56.96  |   |
| 9265 | AABR07042514.3 | -1.27 | 41  | 32.26  | 45  | 25.46  |   |
| 9266 | Arhgap39       | -1.27 | 139 | 5.65   | 154 | 4.46   |   |
| 9267 | Armc1          | -1.27 | 64  | 15.7   | 67  | 12.39  |   |
| 9268 | Bex2           | -1.27 | 52  | 25.23  | 58  | 19.91  |   |
| 9269 | Blvra          | -1.27 | 22  | 5.88   | 26  | 4.64   |   |
| 9270 | Eif2d          | -1.27 | 160 | 25.9   | 165 | 20.44  |   |
| 9271 | Fuz            | -1.27 | 35  | 3.96   | 28  | 3.13   |   |
| 9272 | Hk2            | -1.27 | 120 | 7.2    | 133 | 5.68   |   |
| 9273 | LOC680121      | -1.27 | 0   | 3.1    | 0   | 2.45   |   |
| 9274 | Med22_1        | -1.27 | 0   | 19.56  | 0   | 15.43  |   |
| 9275 | Pex3           | -1.27 | 51  | 6.62   | 63  | 5.22   |   |

Supplemental Table 3  
 FSH + Ad-E versus FSH + Ad-FOXO1(A3), 24 hours

|      | A              | B     | C    | D       | E    | F      | G |
|------|----------------|-------|------|---------|------|--------|---|
| 9276 | Phf19          | -1.27 | 19   | 1.72    | 22   | 1.36   |   |
| 9277 | Tiam1          | -1.27 | 23   | 1.37    | 31   | 1.08   |   |
| 9278 | Mt-co2         | -1.27 | 5021 | 2668.93 | 5307 | 2106.2 |   |
| 9279 | Ltbp3          | -1.27 | 793  | 63.27   | 851  | 49.9   |   |
| 9280 | Sep15          | -1.27 | 400  | 83.09   | 461  | 65.52  |   |
| 9281 | Alg5           | -1.27 | 71   | 13.98   | 95   | 11.03  |   |
| 9282 | Lamtor1        | -1.27 | 164  | 74.31   | 188  | 58.58  |   |
| 9283 | Polrmt         | -1.27 | 59   | 5.32    | 62   | 4.19   |   |
| 9284 | Ssr3           | -1.27 | 677  | 93.67   | 711  | 73.84  |   |
| 9285 | Sidt2          | -1.27 | 429  | 32.46   | 482  | 25.58  |   |
| 9286 | LOC497940      | -1.27 | 73   | 9.21    | 83   | 7.26   |   |
| 9287 | Nmt2           | -1.27 | 264  | 29.08   | 295  | 22.91  |   |
| 9288 | Traf7          | -1.27 | 220  | 28.38   | 240  | 22.36  |   |
| 9289 | Uqcrh          | -1.27 | 183  | 111.2   | 208  | 87.59  |   |
| 9290 | Zfp251         | -1.27 | 140  | 10.19   | 178  | 8.03   |   |
| 9291 | Yipf3          | -1.27 | 137  | 19.7    | 147  | 15.51  |   |
| 9292 | Zfp706         | -1.27 | 165  | 23.67   | 177  | 18.64  |   |
| 9293 | Abcg3l3        | -1.27 | 181  | 10.27   | 224  | 8.08   |   |
| 9294 | Dtx3           | -1.27 | 120  | 20.83   | 133  | 16.4   |   |
| 9295 | Atg7           | -1.27 | 71   | 4.54    | 89   | 3.58   |   |
| 9296 | Ccdc58         | -1.27 | 40   | 5.66    | 46   | 4.45   |   |
| 9297 | H2afv          | -1.27 | 51   | 14.51   | 83   | 11.42  |   |
| 9298 | Hscb           | -1.27 | 41   | 7.21    | 54   | 5.67   |   |
| 9299 | Nfatc2ip       | -1.27 | 21   | 3.18    | 22   | 2.5    |   |
| 9300 | Ssh3           | -1.27 | 87   | 10.25   | 102  | 8.07   |   |
| 9301 | Ston2          | -1.27 | 76   | 6.48    | 75   | 5.1    |   |
| 9302 | AABR07009715.1 | -1.27 | 24   | 17.5    | 18   | 13.78  |   |
| 9303 | RGD1562987     | -1.27 | 107  | 37.15   | 122  | 29.23  |   |
| 9304 | Srp9           | -1.27 | 50   | 10.36   | 48   | 8.15   |   |
| 9305 | Fbn1           | -1.27 | 863  | 30.64   | 924  | 24.11  |   |
| 9306 | Slc30a1        | -1.27 | 145  | 21.22   | 156  | 16.7   |   |
| 9307 | Zfp46          | -1.27 | 114  | 9.25    | 121  | 7.28   |   |
| 9308 | Eif5a          | -1.27 | 1172 | 366.3   | 1243 | 288.1  |   |
| 9309 | Kntc1          | -1.27 | 90   | 4.3     | 104  | 3.38   |   |
| 9310 | Ric1           | -1.27 | 207  | 12.44   | 233  | 9.78   |   |
| 9311 | Ints3          | -1.27 | 294  | 20      | 322  | 15.73  |   |
| 9312 | Snx9           | -1.27 | 135  | 19.71   | 136  | 15.49  |   |
| 9313 | LOC100911248   | -1.27 | 70   | 16.6    | 67   | 13.05  |   |
| 9314 | Zfp394         | -1.27 | 43   | 5.74    | 52   | 4.51   |   |
| 9315 | Ehmt2          | -1.27 | 483  | 38.07   | 492  | 29.92  |   |
| 9316 | Spcs2          | -1.27 | 202  | 24.01   | 225  | 18.86  |   |
| 9317 | Tmem2          | -1.27 | 418  | 20.31   | 458  | 15.96  |   |
| 9318 | Vdac1          | -1.27 | 302  | 87.9    | 308  | 69.03  |   |
| 9319 | Acadm          | -1.27 | 143  | 22.25   | 154  | 17.46  |   |
| 9320 | Bag4           | -1.27 | 34   | 5.28    | 30   | 4.15   |   |
| 9321 | C1rl           | -1.27 | 28   | 3.11    | 31   | 2.44   |   |
| 9322 | Clcf1          | -1.27 | 21   | 3.21    | 26   | 2.52   |   |
| 9323 | Pck2           | -1.27 | 76   | 11.28   | 73   | 8.85   |   |
| 9324 | Uba2-ps1       | -1.27 | 50   | 13.87   | 44   | 10.89  |   |
| 9325 | Zc3h12a        | -1.27 | 21   | 2.54    | 20   | 2      |   |
| 9326 | Rpain          | -1.27 | 43   | 9.42    | 49   | 7.39   |   |
| 9327 | Ganab          | -1.27 | 988  | 88.41   | 1039 | 69.39  |   |
| 9328 | Uhrf1          | -1.27 | 185  | 17      | 195  | 13.34  |   |
| 9329 | Elavl1         | -1.27 | 441  | 47.8    | 546  | 37.51  |   |

Supplemental Table 3  
 FSH + Ad-E versus FSH + Ad-FOXO1(A3), 24 hours

|      | A          | B     | C    | D      | E    | F      | G |
|------|------------|-------|------|--------|------|--------|---|
| 9330 | Ptpn4      | -1.27 | 1186 | 31.79  | 1298 | 24.94  |   |
| 9331 | Upf1       | -1.27 | 339  | 28.17  | 361  | 22.11  |   |
| 9332 | Ap3b1      | -1.27 | 369  | 20.19  | 441  | 15.84  |   |
| 9333 | Prune      | -1.27 | 106  | 10.3   | 129  | 8.08   |   |
| 9334 | Prepl      | -1.27 | 86   | 7.72   | 79   | 6.06   |   |
| 9335 | Fads1      | -1.28 | 490  | 50.24  | 528  | 39.38  |   |
| 9336 | Dus3l      | -1.28 | 64   | 11.22  | 58   | 8.79   |   |
| 9337 | Eftud2     | -1.28 | 407  | 40.59  | 435  | 31.81  |   |
| 9338 | Arhgef10   | -1.28 | 104  | 6.42   | 119  | 5.03   |   |
| 9339 | Sik3       | -1.28 | 562  | 18.84  | 635  | 14.76  |   |
| 9340 | Dapk3      | -1.28 | 97   | 20.08  | 103  | 15.72  |   |
| 9341 | Alg3       | -1.28 | 47   | 10.7   | 46   | 8.38   |   |
| 9342 | BC055324   | -1.28 | 50   | 2.41   | 62   | 1.88   |   |
| 9343 | Kbtbd8     | -1.28 | 22   | 1.53   | 22   | 1.2    |   |
| 9344 | RGD1562339 | -1.28 | 43   | 10.26  | 39   | 8.04   |   |
| 9345 | Rttn       | -1.28 | 65   | 2.07   | 62   | 1.62   |   |
| 9346 | Supv311    | -1.28 | 116  | 11.76  | 121  | 9.21   |   |
| 9347 | Tesk1      | -1.28 | 107  | 10.58  | 113  | 8.29   |   |
| 9348 | Tril       | -1.28 | 398  | 29.97  | 420  | 23.47  |   |
| 9349 | Htra1      | -1.28 | 390  | 66.92  | 427  | 52.4   |   |
| 9350 | Vac14      | -1.28 | 220  | 18.3   | 242  | 14.33  |   |
| 9351 | Psip1      | -1.28 | 257  | 14.2   | 364  | 11.12  |   |
| 9352 | Cry2       | -1.28 | 161  | 11.67  | 165  | 9.14   |   |
| 9353 | Ints2      | -1.28 | 94   | 5.15   | 95   | 4.03   |   |
| 9354 | Ppp2r5c    | -1.28 | 455  | 46.85  | 568  | 36.65  |   |
| 9355 | Trappc3    | -1.28 | 125  | 22.98  | 148  | 17.98  |   |
| 9356 | Exosc4     | -1.28 | 50   | 8.66   | 55   | 6.77   |   |
| 9357 | Lmbr1l     | -1.28 | 189  | 20.94  | 217  | 16.38  |   |
| 9358 | Galns      | -1.28 | 146  | 8.2    | 161  | 6.41   |   |
| 9359 | Cbx8       | -1.28 | 22   | 5.87   | 24   | 4.58   |   |
| 9360 | Chid1      | -1.28 | 0    | 3.89   | 0    | 3.04   |   |
| 9361 | Eefsec     | -1.28 | 74   | 5.98   | 80   | 4.67   |   |
| 9362 | Hyal3      | -1.28 | 24   | 5.69   | 26   | 4.44   |   |
| 9363 | Mfhas1     | -1.28 | 31   | 2.51   | 28   | 1.96   |   |
| 9364 | Nufip1     | -1.28 | 141  | 12.49  | 187  | 9.76   |   |
| 9365 | Zfp729a    | -1.28 | 38   | 3.4    | 37   | 2.65   |   |
| 9366 | LOC499770  | -1.28 | 35   | 8.04   | 39   | 6.29   |   |
| 9367 | Necap1     | -1.28 | 128  | 15.89  | 151  | 12.42  |   |
| 9368 | Ppp2r5b    | -1.28 | 105  | 11.87  | 107  | 9.28   |   |
| 9369 | Rgag4      | -1.28 | 22   | 4.42   | 23   | 3.45   |   |
| 9370 | Sema3b     | -1.28 | 226  | 32.01  | 236  | 25.01  |   |
| 9371 | Tpst1      | -1.28 | 115  | 16.64  | 120  | 13     |   |
| 9372 | Itgb1bp1   | -1.28 | 100  | 18.63  | 127  | 14.55  |   |
| 9373 | Gdpd1      | -1.28 | 92   | 11.97  | 122  | 9.35   |   |
| 9374 | Pias4      | -1.28 | 83   | 8.24   | 94   | 6.43   |   |
| 9375 | Rtn2       | -1.28 | 165  | 25.45  | 167  | 19.86  |   |
| 9376 | Rps3       | -1.28 | 622  | 294.94 | 648  | 230.2  |   |
| 9377 | Mrpl50     | -1.28 | 18   | 4.65   | 24   | 3.63   |   |
| 9378 | Mthfs      | -1.28 | 29   | 3.03   | 41   | 2.36   |   |
| 9379 | N4bp3_1    | -1.28 | 0    | 2.86   | 0    | 2.23   |   |
| 9380 | Incenp     | -1.28 | 83   | 7.01   | 85   | 5.47   |   |
| 9381 | Wrap53     | -1.28 | 68   | 9.19   | 72   | 7.17   |   |
| 9382 | Atp5b      | -1.28 | 2288 | 461.52 | 2388 | 360.01 |   |
| 9383 | Ap2m1      | -1.28 | 639  | 125.9  | 675  | 98.17  |   |

Supplemental Table 3  
 FSH + Ad-E versus FSH + Ad-FOXO1(A3), 24 hours

|      | A          | B     | C    | D      | E    | F      | G |
|------|------------|-------|------|--------|------|--------|---|
| 9384 | Ldb1       | -1.28 | 577  | 77.53  | 642  | 60.46  |   |
| 9385 | Nabp2      | -1.28 | 78   | 17.44  | 80   | 13.6   |   |
| 9386 | Hat1       | -1.28 | 94   | 15.47  | 116  | 12.06  |   |
| 9387 | Spata5     | -1.28 | 120  | 7.71   | 152  | 6.01   |   |
| 9388 | Ankrd52    | -1.28 | 616  | 28.46  | 637  | 22.19  |   |
| 9389 | Bles03     | -1.28 | 97   | 20.31  | 103  | 15.83  |   |
| 9390 | Pofut1     | -1.28 | 167  | 15.74  | 177  | 12.27  |   |
| 9391 | Swap70     | -1.28 | 57   | 4.39   | 78   | 3.42   |   |
| 9392 | Sccpdh     | -1.28 | 0    | 13.84  | 0    | 10.78  |   |
| 9393 | Calr       | -1.28 | 2479 | 483.6  | 2578 | 376.79 |   |
| 9394 | Fubp3      | -1.28 | 242  | 27.72  | 301  | 21.6   |   |
| 9395 | Zcchc12    | -1.28 | 24   | 4.16   | 26   | 3.24   |   |
| 9396 | AC141169.2 | -1.28 | 63   | 3.91   | 67   | 3.05   |   |
| 9397 | Pard6b     | -1.28 | 53   | 5.28   | 53   | 4.11   |   |
| 9398 | Adgra3     | -1.28 | 297  | 21.78  | 298  | 16.95  |   |
| 9399 | Tut1       | -1.28 | 90   | 9.21   | 93   | 7.17   |   |
| 9400 | Ift80      | -1.29 | 71   | 4.49   | 75   | 3.5    |   |
| 9401 | Ctdnep1    | -1.29 | 206  | 47.22  | 222  | 36.74  |   |
| 9402 | Emc7       | -1.29 | 103  | 31.1   | 106  | 24.2   |   |
| 9403 | Mtap       | -1.29 | 122  | 5.13   | 164  | 3.99   |   |
| 9404 | Scamp2     | -1.29 | 273  | 38.38  | 291  | 29.86  |   |
| 9405 | Cpt1a      | -1.29 | 398  | 28.95  | 436  | 22.52  |   |
| 9406 | Ociad1     | -1.29 | 272  | 53.22  | 338  | 41.4   |   |
| 9407 | Cox8a      | -1.29 | 203  | 145.56 | 218  | 113.2  |   |
| 9408 | RGD1310352 | -1.29 | 557  | 82.33  | 589  | 64.02  |   |
| 9409 | Mapk3      | -1.29 | 563  | 106.53 | 588  | 82.83  |   |
| 9410 | Fam173b    | -1.29 | 60   | 6.57   | 79   | 5.11   |   |
| 9411 | Gtf3c5     | -1.29 | 114  | 12.83  | 127  | 9.98   |   |
| 9412 | Irak3      | -1.29 | 41   | 2.86   | 41   | 2.22   |   |
| 9413 | Tmem219    | -1.29 | 35   | 4.04   | 41   | 3.14   |   |
| 9414 | Tsr1       | -1.29 | 127  | 14.99  | 135  | 11.66  |   |
| 9415 | Gstm1      | -1.29 | 107  | 32.44  | 105  | 25.23  |   |
| 9416 | RGD1562948 | -1.29 | 72   | 13.56  | 92   | 10.53  |   |
| 9417 | Ppm1l      | -1.29 | 158  | 6.49   | 166  | 5.04   |   |
| 9418 | Pfdn4      | -1.29 | 58   | 24.59  | 64   | 19.1   |   |
| 9419 | Pomt1      | -1.29 | 167  | 16.91  | 191  | 13.14  |   |
| 9420 | Notch2     | -1.29 | 802  | 33.15  | 840  | 25.74  |   |
| 9421 | Bdh2       | -1.29 | 45   | 8.14   | 57   | 6.32   |   |
| 9422 | Ssh2       | -1.29 | 41   | 1.48   | 58   | 1.15   |   |
| 9423 | Eif2b2     | -1.29 | 59   | 7.79   | 56   | 6.05   |   |
| 9424 | Rhbdf2     | -1.29 | 63   | 5.36   | 66   | 4.16   |   |
| 9425 | Ubxn8      | -1.29 | 32   | 2.68   | 35   | 2.08   |   |
| 9426 | Ssr2       | -1.29 | 335  | 109.07 | 352  | 84.67  |   |
| 9427 | Edc4       | -1.29 | 292  | 19.78  | 317  | 15.35  |   |
| 9428 | Naa40      | -1.29 | 137  | 11.94  | 150  | 9.27   |   |
| 9429 | Xpr1       | -1.29 | 114  | 11.46  | 125  | 8.89   |   |
| 9430 | Neto2      | -1.29 | 79   | 12.16  | 101  | 9.43   |   |
| 9431 | Zfp1       | -1.29 | 57   | 9.32   | 62   | 7.23   |   |
| 9432 | Tle4       | -1.29 | 211  | 8.02   | 238  | 6.22   |   |
| 9433 | Btf3l4     | -1.29 | 29   | 20.49  | 30   | 15.89  |   |
| 9434 | Coq5       | -1.29 | 52   | 6.27   | 46   | 4.86   |   |
| 9435 | Mzt2b      | -1.29 | 32   | 8.05   | 29   | 6.24   |   |
| 9436 | Zfand2b    | -1.29 | 31   | 7.57   | 30   | 5.87   |   |
| 9437 | Zfp672     | -1.29 | 63   | 6.69   | 67   | 5.19   |   |

Supplemental Table 3  
 FSH + Ad-E versus FSH + Ad-FOXO1(A3), 24 hours

|      | A            | B     | C   | D      | E   | F      | G |
|------|--------------|-------|-----|--------|-----|--------|---|
| 9438 | Marc2        | -1.29 | 70  | 10.07  | 81  | 7.81   |   |
| 9439 | Pdgfa        | -1.29 | 33  | 5.17   | 42  | 4.01   |   |
| 9440 | Setd6        | -1.29 | 29  | 5.81   | 36  | 4.5    |   |
| 9441 | Maea         | -1.29 | 215 | 32.17  | 238 | 24.93  |   |
| 9442 | Atxn7l3      | -1.29 | 58  | 15.33  | 59  | 11.88  |   |
| 9443 | Vps16        | -1.29 | 151 | 19.1   | 165 | 14.8   |   |
| 9444 | Elovl1       | -1.29 | 239 | 49.86  | 243 | 38.62  |   |
| 9445 | Cdca4        | -1.29 | 125 | 17.59  | 142 | 13.62  |   |
| 9446 | Dnajc5       | -1.29 | 101 | 28.16  | 118 | 21.81  |   |
| 9447 | Ror2         | -1.29 | 51  | 2.57   | 63  | 1.99   |   |
| 9448 | Dvl1         | -1.29 | 118 | 13.85  | 129 | 10.72  |   |
| 9449 | Fut8         | -1.29 | 339 | 36.25  | 357 | 28.06  |   |
| 9450 | Mtss1        | -1.29 | 165 | 6.16   | 169 | 4.77   |   |
| 9451 | Extl3        | -1.29 | 255 | 27.93  | 282 | 21.61  |   |
| 9452 | Dym          | -1.29 | 163 | 15.44  | 190 | 11.95  |   |
| 9453 | Slc2a8       | -1.29 | 34  | 5.03   | 38  | 3.89   |   |
| 9454 | Tvp23b       | -1.29 | 97  | 19.07  | 91  | 14.75  |   |
| 9455 | Bpnt1        | -1.29 | 70  | 10.45  | 67  | 8.08   |   |
| 9456 | Kdelr2       | -1.29 | 487 | 88.14  | 511 | 68.16  |   |
| 9457 | Rrp1b        | -1.29 | 180 | 14.39  | 189 | 11.13  |   |
| 9458 | Prickle1     | -1.29 | 96  | 7.1    | 106 | 5.49   |   |
| 9459 | Megf8        | -1.29 | 718 | 19.68  | 756 | 15.21  |   |
| 9460 | Ppa2         | -1.29 | 77  | 13.41  | 88  | 10.37  |   |
| 9461 | Nsdhl        | -1.29 | 184 | 21.48  | 190 | 16.61  |   |
| 9462 | Mfsd5        | -1.29 | 89  | 18.58  | 92  | 14.36  |   |
| 9463 | Actr5        | -1.29 | 35  | 5.56   | 42  | 4.3    |   |
| 9464 | Dcaf15       | -1.29 | 103 | 14.55  | 98  | 11.24  |   |
| 9465 | LOC100910275 | -1.29 | 9   | 21.24  | 4   | 16.41  |   |
| 9466 | Rab13        | -1.29 | 35  | 10.19  | 36  | 7.87   |   |
| 9467 | Timm10       | -1.29 | 31  | 10.29  | 33  | 7.95   |   |
| 9468 | Otub1        | -1.29 | 273 | 58.38  | 264 | 45.09  |   |
| 9469 | Prkar1a      | -1.29 | 820 | 198.96 | 892 | 153.66 |   |
| 9470 | Hace1        | -1.3  | 107 | 6.42   | 118 | 4.96   |   |
| 9471 | Nup188       | -1.3  | 465 | 32.11  | 496 | 24.79  |   |
| 9472 | Camsap3      | -1.3  | 71  | 5.11   | 75  | 3.94   |   |
| 9473 | Nupl1        | -1.3  | 100 | 9.06   | 114 | 6.99   |   |
| 9474 | Pigv         | -1.3  | 64  | 4.37   | 68  | 3.37   |   |
| 9475 | Pp2d1        | -1.3  | 31  | 3.05   | 53  | 2.35   |   |
| 9476 | Psmc9        | -1.3  | 48  | 8.36   | 51  | 6.45   |   |
| 9477 | Dazap2       | -1.3  | 209 | 78.49  | 225 | 60.57  |   |
| 9478 | Tbc1d7       | -1.3  | 35  | 8.22   | 38  | 6.34   |   |
| 9479 | Rpl35        | -1.3  | 184 | 176.98 | 192 | 136.56 |   |
| 9480 | Zfp395       | -1.3  | 228 | 19.43  | 234 | 14.99  |   |
| 9481 | Rnpc3        | -1.3  | 98  | 10.19  | 118 | 7.86   |   |
| 9482 | Pisd         | -1.3  | 166 | 31.75  | 190 | 24.49  |   |
| 9483 | Tbrg1        | -1.3  | 38  | 68.99  | 44  | 53.2   |   |
| 9484 | Letm1        | -1.3  | 173 | 21.33  | 202 | 16.45  |   |
| 9485 | Zfp169       | -1.3  | 40  | 4.32   | 39  | 3.33   |   |
| 9486 | Arhgef28     | -1.3  | 740 | 22.5   | 752 | 17.35  |   |
| 9487 | Ly6e         | -1.3  | 386 | 65.57  | 400 | 50.54  |   |
| 9488 | Wars         | -1.3  | 147 | 12.66  | 158 | 9.76   |   |
| 9489 | Igsf3        | -1.3  | 204 | 9.3    | 214 | 7.17   |   |
| 9490 | Prmt7        | -1.3  | 113 | 14.29  | 117 | 11.01  |   |
| 9491 | Ddit4l2      | -1.3  | 240 | 92.74  | 254 | 71.46  |   |



Supplemental Table 3  
 FSH + Ad-E versus FSH + Ad-FOXO1(A3), 24 hours

|      | A              | B     | C    | D       | E    | F      | G |
|------|----------------|-------|------|---------|------|--------|---|
| 9492 | Fam78a         | -1.3  | 173  | 23.46   | 196  | 18.07  |   |
| 9493 | Dag1           | -1.3  | 5826 | 408.79  | 6023 | 314.92 |   |
| 9494 | Ccdc23         | -1.3  | 39   | 13.96   | 41   | 10.75  |   |
| 9495 | Spag5          | -1.3  | 36   | 3.06    | 43   | 2.35   |   |
| 9496 | Tmem198b       | -1.3  | 35   | 4.53    | 35   | 3.49   |   |
| 9497 | Senp2          | -1.3  | 79   | 11.63   | 96   | 8.95   |   |
| 9498 | Snx14          | -1.3  | 148  | 13      | 173  | 10     |   |
| 9499 | Dffb           | -1.3  | 57   | 4.94    | 57   | 3.8    |   |
| 9500 | Dcaf12l1       | -1.3  | 34   | 3.49    | 35   | 2.68   |   |
| 9501 | Dhtkd1         | -1.3  | 40   | 2.83    | 46   | 2.18   |   |
| 9502 | Trrap          | -1.3  | 1520 | 40.35   | 1596 | 31.04  |   |
| 9503 | Gnb2l1_1       | -1.3  | 1146 | 230.1   | 1138 | 177.02 |   |
| 9504 | Accs           | -1.3  | 44   | 5.88    | 43   | 4.52   |   |
| 9505 | Entpd1         | -1.3  | 28   | 2.68    | 32   | 2.06   |   |
| 9506 | Sepsecs        | -1.3  | 48   | 3.53    | 62   | 2.72   |   |
| 9507 | Slc35c1        | -1.3  | 74   | 7.89    | 80   | 6.06   |   |
| 9508 | Pik3r4         | -1.3  | 222  | 15.06   | 245  | 11.58  |   |
| 9509 | Prcc           | -1.3  | 230  | 30.39   | 262  | 23.37  |   |
| 9510 | Pard3          | -1.3  | 584  | 15.38   | 663  | 11.82  |   |
| 9511 | Tomm40         | -1.3  | 83   | 24      | 81   | 18.44  |   |
| 9512 | Slc9a6         | -1.3  | 148  | 8.21    | 166  | 6.31   |   |
| 9513 | Parp2          | -1.3  | 84   | 13.34   | 91   | 10.24  |   |
| 9514 | Zfp687         | -1.3  | 149  | 13.49   | 151  | 10.36  |   |
| 9515 | Cnep1r1        | -1.3  | 100  | 23.69   | 118  | 18.19  |   |
| 9516 | Hps3           | -1.3  | 40   | 3.44    | 49   | 2.64   |   |
| 9517 | Smox           | -1.3  | 50   | 5.15    | 60   | 3.95   |   |
| 9518 | Rpl7           | -1.3  | 1049 | 84.84   | 1126 | 65.11  |   |
| 9519 | Sesn3          | -1.3  | 257  | 28.14   | 278  | 21.59  |   |
| 9520 | Gcsh           | -1.3  | 44   | 11.03   | 46   | 8.47   |   |
| 9521 | Ighmbp2        | -1.3  | 46   | 3.71    | 52   | 2.84   |   |
| 9522 | Dctn3          | -1.3  | 89   | 29.54   | 98   | 22.65  |   |
| 9523 | Fam50a_2       | -1.3  | 0    | 10.67   | 0    | 8.18   |   |
| 9524 | ST7            | -1.3  | 68   | 5.72    | 89   | 4.38   |   |
| 9525 | Gdi1           | -1.3  | 879  | 123.2   | 864  | 94.46  |   |
| 9526 | Ccdc126        | -1.3  | 45   | 6.29    | 48   | 4.82   |   |
| 9527 | Faxdc2         | -1.3  | 98   | 15.13   | 102  | 11.6   |   |
| 9528 | Pskh1          | -1.3  | 143  | 10.54   | 161  | 8.08   |   |
| 9529 | Zfp9           | -1.3  | 41   | 6.32    | 42   | 4.84   |   |
| 9530 | 5_8S_rRNA_14   | -1.31 | 0    | 1351.25 | 0    | 1035   |   |
| 9531 | Gin1           | -1.31 | 59   | 3.82    | 67   | 2.93   |   |
| 9532 | Tmem69         | -1.31 | 42   | 7.64    | 42   | 5.85   |   |
| 9533 | Dos            | -1.31 | 52   | 5.62    | 62   | 4.3    |   |
| 9534 | AABR07029742.1 | -1.31 | 42   | 8.58    | 43   | 6.56   |   |
| 9535 | Slc25a20       | -1.31 | 197  | 34.33   | 208  | 26.27  |   |
| 9536 | Mesdc1         | -1.31 | 169  | 30.31   | 172  | 23.19  |   |
| 9537 | Agpat3         | -1.31 | 241  | 12.85   | 263  | 9.83   |   |
| 9538 | Kihl21         | -1.31 | 88   | 8.13    | 91   | 6.22   |   |
| 9539 | Ebf4           | -1.31 | 82   | 9.25    | 111  | 7.08   |   |
| 9540 | Pde6d          | -1.31 | 109  | 13.91   | 135  | 10.64  |   |
| 9541 | LOC498555      | -1.31 | 104  | 262.01  | 144  | 200.32 |   |
| 9542 | Rps19          | -1.31 | 18   | 123.67  | 30   | 94.51  |   |
| 9543 | Hmgcr          | -1.31 | 615  | 49.37   | 634  | 37.73  |   |
| 9544 | Cnm3           | -1.31 | 154  | 11.99   | 169  | 9.16   |   |
| 9545 | Wiz            | -1.31 | 331  | 24.87   | 384  | 19     |   |

Supplemental Table 3  
 FSH + Ad-E versus FSH + Ad-FOXO1(A3), 24 hours

|      | A            | B     | C    | D      | E    | F      | G |
|------|--------------|-------|------|--------|------|--------|---|
| 9546 | Top2a        | -1.31 | 184  | 11.79  | 195  | 9.01   |   |
| 9547 | Zdhhc1       | -1.31 | 37   | 10.47  | 40   | 7.99   |   |
| 9548 | Tnk2         | -1.31 | 256  | 16.06  | 308  | 12.26  |   |
| 9549 | Nr5a2        | -1.31 | 940  | 49.14  | 967  | 37.51  |   |
| 9550 | Gmppb        | -1.31 | 49   | 9.04   | 48   | 6.9    |   |
| 9551 | Lrrc8a       | -1.31 | 364  | 37.26  | 388  | 28.43  |   |
| 9552 | Evl          | -1.31 | 316  | 37.47  | 358  | 28.58  |   |
| 9553 | Hps6         | -1.31 | 49   | 6.57   | 50   | 5.01   |   |
| 9554 | LOC100911615 | -1.31 | 0    | 16.14  | 0    | 12.31  |   |
| 9555 | Atraid       | -1.31 | 54   | 17.59  | 53   | 13.42  |   |
| 9556 | Ccdc22       | -1.31 | 44   | 7.04   | 46   | 5.37   |   |
| 9557 | Rqcd1        | -1.31 | 172  | 16.43  | 196  | 12.53  |   |
| 9558 | Bpgm         | -1.31 | 59   | 9.79   | 59   | 7.46   |   |
| 9559 | Ift46        | -1.31 | 79   | 11.21  | 73   | 8.55   |   |
| 9560 | RGD1310951   | -1.31 | 243  | 15.38  | 314  | 11.73  |   |
| 9561 | C1galt1      | -1.31 | 107  | 6.1    | 111  | 4.65   |   |
| 9562 | Mmp14        | -1.31 | 476  | 69.23  | 490  | 52.76  |   |
| 9563 | RGD1562218   | -1.31 | 163  | 14.06  | 176  | 10.72  |   |
| 9564 | Rint1        | -1.31 | 70   | 8.53   | 81   | 6.5    |   |
| 9565 | Bsg          | -1.31 | 869  | 183.54 | 905  | 139.82 |   |
| 9566 | Eral1        | -1.31 | 69   | 9.62   | 80   | 7.32   |   |
| 9567 | Rnf19b       | -1.31 | 210  | 24.49  | 231  | 18.65  |   |
| 9568 | Zfp652       | -1.31 | 63   | 7.66   | 66   | 5.83   |   |
| 9569 | Sod2         | -1.31 | 172  | 29.84  | 175  | 22.7   |   |
| 9570 | Yaf2         | -1.31 | 82   | 11.76  | 119  | 8.95   |   |
| 9571 | Smarca4      | -1.31 | 1007 | 55.6   | 1036 | 42.3   |   |
| 9572 | Tmem176a     | -1.31 | 237  | 76.77  | 242  | 58.4   |   |
| 9573 | Gpr89b       | -1.31 | 147  | 23.31  | 154  | 17.73  |   |
| 9574 | Exoc7_2      | -1.31 | 3    | 10.07  | 2    | 7.66   |   |
| 9575 | Sdhd         | -1.32 | 121  | 35.02  | 136  | 26.63  |   |
| 9576 | RGD1306058   | -1.32 | 84   | 22.9   | 106  | 17.41  |   |
| 9577 | Exoc4        | -1.32 | 294  | 12.21  | 314  | 9.28   |   |
| 9578 | Eif3l        | -1.32 | 113  | 30.45  | 104  | 23.14  |   |
| 9579 | Cstf1        | -1.32 | 132  | 14.04  | 155  | 10.67  |   |
| 9580 | Atp1b3       | -1.32 | 709  | 137.62 | 738  | 104.52 |   |
| 9581 | Zfp335       | -1.32 | 155  | 10.8   | 175  | 8.2    |   |
| 9582 | Capn1        | -1.32 | 349  | 38.93  | 349  | 29.55  |   |
| 9583 | Nav2         | -1.32 | 909  | 19.58  | 1022 | 14.86  |   |
| 9584 | Got2         | -1.32 | 391  | 59.88  | 425  | 45.46  |   |
| 9585 | Sptssa       | -1.32 | 155  | 36.4   | 179  | 27.63  |   |
| 9586 | Ttc27        | -1.32 | 177  | 17.01  | 192  | 12.91  |   |
| 9587 | Pdhb         | -1.32 | 164  | 24.26  | 164  | 18.41  |   |
| 9588 | Tmem184b     | -1.32 | 303  | 29.01  | 314  | 22.01  |   |
| 9589 | Cherp        | -1.32 | 273  | 23.76  | 277  | 18.03  |   |
| 9590 | Sec23b       | -1.32 | 237  | 26.52  | 248  | 20.12  |   |
| 9591 | Homer3       | -1.32 | 80   | 7.2    | 100  | 5.46   |   |
| 9592 | Zfp161       | -1.32 | 71   | 6.81   | 74   | 5.17   |   |
| 9593 | Saal1        | -1.32 | 74   | 4.01   | 88   | 3.04   |   |
| 9594 | Reep5        | -1.32 | 294  | 34.33  | 312  | 26.04  |   |
| 9595 | Ap1m1        | -1.32 | 263  | 39     | 283  | 29.58  |   |
| 9596 | Bag6         | -1.32 | 1238 | 110.85 | 1267 | 84.06  |   |
| 9597 | Zadh2        | -1.32 | 188  | 15.1   | 197  | 11.45  |   |
| 9598 | Upf3b        | -1.32 | 164  | 10.94  | 187  | 8.29   |   |
| 9599 | Snd1         | -1.32 | 655  | 59.85  | 695  | 45.38  |   |

Supplemental Table 3  
 FSH + Ad-E versus FSH + Ad-FOXO1(A3), 24 hours

|      | A              | B     | C    | D      | E    | F      | G |
|------|----------------|-------|------|--------|------|--------|---|
| 9600 | Rhbdf1         | -1.32 | 161  | 17.79  | 173  | 13.48  |   |
| 9601 | Snx17          | -1.32 | 165  | 29.2   | 172  | 22.12  |   |
| 9602 | Bcl10          | -1.32 | 93   | 16.83  | 96   | 12.75  |   |
| 9603 | Prc1           | -1.32 | 81   | 9.15   | 84   | 6.93   |   |
| 9604 | Cmtr1          | -1.32 | 446  | 35.63  | 486  | 26.97  |   |
| 9605 | Pdia5          | -1.32 | 125  | 16.67  | 135  | 12.62  |   |
| 9606 | Gtf2ird1       | -1.32 | 40   | 14.84  | 49   | 11.23  |   |
| 9607 | Pcdhac1        | -1.32 | 280  | 3.24   | 275  | 2.45   |   |
| 9608 | Serpinh1       | -1.32 | 2159 | 366.91 | 2189 | 277.68 |   |
| 9609 | Mavs           | -1.32 | 103  | 9.87   | 107  | 7.47   |   |
| 9610 | Sox5           | -1.32 | 263  | 8.57   | 388  | 6.48   |   |
| 9611 | Inmt           | -1.32 | 85   | 27.12  | 85   | 20.52  |   |
| 9612 | Cd276          | -1.32 | 303  | 19.3   | 343  | 14.59  |   |
| 9613 | Cdc40          | -1.32 | 116  | 9.1    | 121  | 6.88   |   |
| 9614 | Atf6b          | -1.32 | 179  | 33.9   | 157  | 25.63  |   |
| 9615 | Fzd1           | -1.32 | 367  | 30.54  | 372  | 23.08  |   |
| 9616 | Polr3d         | -1.32 | 99   | 17.95  | 104  | 13.56  |   |
| 9617 | Taz            | -1.32 | 120  | 19.47  | 111  | 14.71  |   |
| 9618 | Pbx2           | -1.32 | 72   | 24.02  | 50   | 18.14  |   |
| 9619 | Sgsm2          | -1.32 | 408  | 22.19  | 407  | 16.75  |   |
| 9620 | Tbc1d13        | -1.32 | 120  | 14.15  | 126  | 10.68  |   |
| 9621 | Hk1            | -1.32 | 241  | 27.81  | 258  | 20.99  |   |
| 9622 | Fam222b        | -1.33 | 179  | 9.63   | 222  | 7.26   |   |
| 9623 | Ltbp1          | -1.33 | 683  | 32.53  | 712  | 24.53  |   |
| 9624 | Mapk14         | -1.33 | 383  | 23.26  | 430  | 17.54  |   |
| 9625 | Fam149b1       | -1.33 | 198  | 17.96  | 238  | 13.54  |   |
| 9626 | Clasp2         | -1.33 | 584  | 26.79  | 602  | 20.2   |   |
| 9627 | Usp36          | -1.33 | 198  | 9.05   | 216  | 6.83   |   |
| 9628 | Vta1           | -1.33 | 139  | 31.75  | 167  | 23.93  |   |
| 9629 | 7SK_212        | -1.33 | 102  | 398.17 | 166  | 300.13 |   |
| 9630 | Soga1          | -1.33 | 368  | 19.13  | 378  | 14.42  |   |
| 9631 | Dnm2           | -1.33 | 338  | 24.42  | 366  | 18.4   |   |
| 9632 | Aup1           | -1.33 | 148  | 32.57  | 149  | 24.54  |   |
| 9633 | GImp           | -1.33 | 132  | 92.94  | 95   | 70     |   |
| 9634 | Grk6           | -1.33 | 147  | 9.01   | 147  | 6.78   |   |
| 9635 | Psmc4          | -1.33 | 286  | 72.31  | 296  | 54.44  |   |
| 9636 | Abca1          | -1.33 | 377  | 15.51  | 393  | 11.68  |   |
| 9637 | Ifnar2         | -1.33 | 213  | 30.87  | 237  | 23.23  |   |
| 9638 | Aar2           | -1.33 | 171  | 14.52  | 164  | 10.93  |   |
| 9639 | Abcf2          | -1.33 | 148  | 20.28  | 127  | 15.25  |   |
| 9640 | Rpa1           | -1.33 | 195  | 19.28  | 195  | 14.5   |   |
| 9641 | Prdx3          | -1.33 | 178  | 40.56  | 178  | 30.5   |   |
| 9642 | Enpp5          | -1.33 | 186  | 28.86  | 192  | 21.71  |   |
| 9643 | Sgcb           | -1.33 | 209  | 18.35  | 231  | 13.79  |   |
| 9644 | Cyc1           | -1.33 | 216  | 63.32  | 220  | 47.57  |   |
| 9645 | Pigk           | -1.33 | 256  | 52.06  | 268  | 39.1   |   |
| 9646 | Ddx39b         | -1.34 | 330  | 65.84  | 329  | 49.28  |   |
| 9647 | 5S_rRNA_148    | -1.34 | 0    | 3.04   | 0    | 2.27   |   |
| 9648 | AABR07002001.1 | -1.34 | 1    | 0.3    | 1    | 0.23   |   |
| 9649 | AABR07006258.1 | -1.34 | 0    | 0.71   | 0    | 0.53   |   |
| 9650 | AABR07006894.1 | -1.34 | 9    | 1.14   | 10   | 0.85   |   |
| 9651 | AABR07048637.1 | -1.34 | 1    | 0.07   | 1    | 0.05   |   |
| 9652 | AABR07066516.1 | -1.34 | 2    | 1.41   | 2    | 1.06   |   |
| 9653 | Bend6          | -1.34 | 6    | 0.36   | 6    | 0.27   |   |

Supplemental Table 3  
 FSH + Ad-E versus FSH + Ad-FOXO1(A3), 24 hours

|      | A              | B     | C   | D     | E   | F     | G |
|------|----------------|-------|-----|-------|-----|-------|---|
| 9654 | Camkk1         | -1.34 | 5   | 0.57  | 4   | 0.43  |   |
| 9655 | Ccna1          | -1.34 | 1   | 0.2   | 1   | 0.15  |   |
| 9656 | Ccnd1          | -1.34 | 1   | 0.09  | 2   | 0.07  |   |
| 9657 | Cdc42ep5       | -1.34 | 2   | 1.38  | 2   | 1.03  |   |
| 9658 | Cmpk2          | -1.34 | 13  | 1.23  | 13  | 0.92  |   |
| 9659 | Cnga1          | -1.34 | 1   | 0.18  | 2   | 0.13  |   |
| 9660 | Ddb2           | -1.34 | 35  | 2.95  | 44  | 2.21  |   |
| 9661 | Ddx28          | -1.34 | 29  | 5.44  | 29  | 4.07  |   |
| 9662 | Dqx1           | -1.34 | 6   | 0.83  | 7   | 0.62  |   |
| 9663 | Fndc3c1        | -1.34 | 4   | 0.26  | 5   | 0.19  |   |
| 9664 | Gabra1         | -1.34 | 2   | 0.08  | 1   | 0.06  |   |
| 9665 | Gpihbp1        | -1.34 | 1   | 0.44  | 1   | 0.33  |   |
| 9666 | Gramd1c_1      | -1.34 | 5   | 0.76  | 6   | 0.57  |   |
| 9667 | Hmgb1-ps3      | -1.34 | 0   | 0.57  | 0   | 0.42  |   |
| 9668 | Igflr1         | -1.34 | 2   | 0.59  | 3   | 0.44  |   |
| 9669 | Kdf1           | -1.34 | 4   | 0.21  | 1   | 0.16  |   |
| 9670 | Letmd1         | -1.34 | 88  | 10.82 | 96  | 8.09  |   |
| 9671 | LOC100910318_1 | -1.34 | 10  | 11.66 | 21  | 8.72  |   |
| 9672 | LOC102555727   | -1.34 | 0   | 0.35  | 0   | 0.26  |   |
| 9673 | LOC685067      | -1.34 | 1   | 0.19  | 1   | 0.14  |   |
| 9674 | Mier2          | -1.34 | 134 | 12.33 | 150 | 9.22  |   |
| 9675 | Nelfe          | -1.34 | 50  | 11.03 | 56  | 8.25  |   |
| 9676 | Nlrc3          | -1.34 | 11  | 0.11  | 10  | 0.08  |   |
| 9677 | Nt5c1b         | -1.34 | 1   | 0.18  | 3   | 0.13  |   |
| 9678 | Pigw           | -1.34 | 20  | 4.8   | 20  | 3.59  |   |
| 9679 | Plgrkt         | -1.34 | 20  | 4.24  | 18  | 3.17  |   |
| 9680 | Polr1e         | -1.34 | 19  | 2.69  | 21  | 2.01  |   |
| 9681 | Prf1           | -1.34 | 1   | 0.14  | 0   | 0.11  |   |
| 9682 | Psmc10         | -1.34 | 7   | 1.38  | 8   | 1.03  |   |
| 9683 | Ptch2          | -1.34 | 6   | 0.22  | 4   | 0.17  |   |
| 9684 | Rbm46          | -1.34 | 4   | 0.61  | 7   | 0.45  |   |
| 9685 | RGD1311447     | -1.34 | 5   | 0.77  | 12  | 0.58  |   |
| 9686 | Rn60_20_0051.7 | -1.34 | 0   | 0.55  | 1   | 0.41  |   |
| 9687 | Sall1          | -1.34 | 2   | 0.07  | 2   | 0.05  |   |
| 9688 | Sall4          | -1.34 | 1   | 0.11  | 3   | 0.08  |   |
| 9689 | Slc29a4        | -1.34 | 2   | 0.3   | 3   | 0.23  |   |
| 9690 | Slco2b1        | -1.34 | 4   | 0.08  | 3   | 0.06  |   |
| 9691 | SNORA73_5      | -1.34 | 0   | 1.77  | 0   | 1.33  |   |
| 9692 | SNORD11B       | -1.34 | 0   | 9.05  | 0   | 6.77  |   |
| 9693 | Ttc39c         | -1.34 | 62  | 6.08  | 63  | 4.54  |   |
| 9694 | Urad           | -1.34 | 1   | 0.71  | 1   | 0.53  |   |
| 9695 | Zfp791         | -1.34 | 3   | 0.19  | 1   | 0.14  |   |
| 9696 | 3082ex4-5      | -1.34 | 6   | 6.94  | 6   | 5.19  |   |
| 9697 | 5_8S_rRNA_27   | -1.34 | 0   | 9.47  | 0   | 7.08  |   |
| 9698 | 5_8S_rRNA_7    | -1.34 | 1   | 2.37  | 1   | 1.77  |   |
| 9699 | 5S_rRNA_188    | -1.34 | 0   | 15.21 | 0   | 11.37 |   |
| 9700 | 7SK_111        | -1.34 | 0   | 1.14  | 1   | 0.85  |   |
| 9701 | AABR07000670.1 | -1.34 | 3   | 1.33  | 4   | 0.99  |   |
| 9702 | AABR07001512.1 | -1.34 | 1   | 0.68  | 1   | 0.51  |   |
| 9703 | AABR07001591.1 | -1.34 | 4   | 0.54  | 4   | 0.4   |   |
| 9704 | AABR07002010.1 | -1.34 | 6   | 0.35  | 6   | 0.26  |   |
| 9705 | AABR07002493.1 | -1.34 | 11  | 0.45  | 15  | 0.33  |   |
| 9706 | AABR07003017.1 | -1.34 | 0   | 1.63  | 0   | 1.22  |   |
| 9707 | AABR07004799.1 | -1.34 | 1   | 1.11  | 0   | 0.83  |   |

Supplemental Table 3  
 FSH + Ad-E versus FSH + Ad-FOXO1(A3), 24 hours

|      | A              | B     | C  | D    | E  | F    | G |
|------|----------------|-------|----|------|----|------|---|
| 9708 | AABR07006458.1 | -1.34 | 19 | 5.01 | 22 | 3.74 |   |
| 9709 | AABR07008097.1 | -1.34 | 0  | 0.3  | 1  | 0.23 |   |
| 9710 | AABR07009834.1 | -1.34 | 1  | 1.08 | 1  | 0.81 |   |
| 9711 | AABR07012065.1 | -1.34 | 24 | 6.97 | 24 | 5.21 |   |
| 9712 | AABR07013200.1 | -1.34 | 1  | 0.36 | 1  | 0.27 |   |
| 9713 | AABR07015015.2 | -1.34 | 1  | 0.8  | 0  | 0.6  |   |
| 9714 | AABR07016577.1 | -1.34 | 0  | 1.72 | 0  | 1.29 |   |
| 9715 | AABR07019086.1 | -1.34 | 11 | 0.62 | 13 | 0.46 |   |
| 9716 | AABR07021086.1 | -1.34 | 1  | 0.39 | 1  | 0.29 |   |
| 9717 | AABR07021759.1 | -1.34 | 0  | 0.77 | 0  | 0.57 |   |
| 9718 | AABR07024908.1 | -1.34 | 0  | 3.23 | 0  | 2.42 |   |
| 9719 | AABR07025757.1 | -1.34 | 1  | 0.33 | 1  | 0.25 |   |
| 9720 | AABR07026002.1 | -1.34 | 1  | 0.24 | 1  | 0.18 |   |
| 9721 | AABR07026557.2 | -1.34 | 4  | 0.24 | 10 | 0.18 |   |
| 9722 | AABR07028009.1 | -1.34 | 0  | 0.48 | 1  | 0.36 |   |
| 9723 | AABR07028907.1 | -1.34 | 3  | 0.29 | 2  | 0.22 |   |
| 9724 | AABR07028998.1 | -1.34 | 0  | 0.24 | 1  | 0.18 |   |
| 9725 | AABR07030563.1 | -1.34 | 0  | 0.74 | 0  | 0.56 |   |
| 9726 | AABR07030603.1 | -1.34 | 3  | 3.45 | 3  | 2.58 |   |
| 9727 | AABR07030603.2 | -1.34 | 2  | 3.22 | 2  | 2.41 |   |
| 9728 | AABR07030890.1 | -1.34 | 2  | 0.64 | 1  | 0.48 |   |
| 9729 | AABR07032255.2 | -1.34 | 0  | 0.83 | 0  | 0.62 |   |
| 9730 | AABR07032453.1 | -1.34 | 1  | 0.5  | 0  | 0.37 |   |
| 9731 | AABR07032518.1 | -1.34 | 1  | 0.49 | 1  | 0.37 |   |
| 9732 | AABR07034742.2 | -1.34 | 0  | 3.32 | 0  | 2.48 |   |
| 9733 | AABR07034940.2 | -1.34 | 37 | 2.05 | 39 | 1.53 |   |
| 9734 | AABR07035758.1 | -1.34 | 0  | 0.24 | 1  | 0.18 |   |
| 9735 | AABR07035832.1 | -1.34 | 6  | 2.19 | 11 | 1.64 |   |
| 9736 | AABR07036723.1 | -1.34 | 0  | 1.02 | 0  | 0.76 |   |
| 9737 | AABR07043772.1 | -1.34 | 3  | 0.8  | 3  | 0.6  |   |
| 9738 | AABR07044414.1 | -1.34 | 0  | 0.82 | 0  | 0.61 |   |
| 9739 | AABR07044569.1 | -1.34 | 4  | 0.21 | 2  | 0.16 |   |
| 9740 | AABR07045399.2 | -1.34 | 2  | 0.31 | 1  | 0.23 |   |
| 9741 | AABR07045405.1 | -1.34 | 5  | 1.68 | 8  | 1.25 |   |
| 9742 | AABR07049960.1 | -1.34 | 0  | 0.6  | 0  | 0.45 |   |
| 9743 | AABR07051249.1 | -1.34 | 2  | 0.32 | 4  | 0.24 |   |
| 9744 | AABR07052085.1 | -1.34 | 2  | 0.88 | 1  | 0.66 |   |
| 9745 | AABR07052441.1 | -1.34 | 7  | 0.14 | 11 | 0.1  |   |
| 9746 | AABR07053188.1 | -1.34 | 0  | 1.09 | 0  | 0.81 |   |
| 9747 | AABR07054329.1 | -1.34 | 1  | 3.35 | 0  | 2.51 |   |
| 9748 | AABR07055801.1 | -1.34 | 4  | 3.89 | 5  | 2.91 |   |
| 9749 | AABR07055943.1 | -1.34 | 0  | 0.33 | 0  | 0.24 |   |
| 9750 | AABR07058831.1 | -1.34 | 1  | 1.4  | 1  | 1.04 |   |
| 9751 | AABR07059786.1 | -1.34 | 0  | 0.54 | 0  | 0.4  |   |
| 9752 | AABR07060133.1 | -1.34 | 34 | 0.88 | 67 | 0.66 |   |
| 9753 | AABR07060291.1 | -1.34 | 1  | 5.25 | 1  | 3.92 |   |
| 9754 | AABR07060610.1 | -1.34 | 0  | 3.7  | 0  | 2.77 |   |
| 9755 | AABR07060628.1 | -1.34 | 0  | 0.59 | 1  | 0.44 |   |
| 9756 | AABR07062154.1 | -1.34 | 2  | 0.92 | 2  | 0.69 |   |
| 9757 | AABR07063459.1 | -1.34 | 1  | 0.98 | 0  | 0.73 |   |
| 9758 | AABR07063724.1 | -1.34 | 2  | 0.22 | 2  | 0.16 |   |
| 9759 | AABR07064711.1 | -1.34 | 1  | 0.68 | 0  | 0.51 |   |
| 9760 | AABR07068674.1 | -1.34 | 1  | 0.12 | 1  | 0.09 |   |
| 9761 | AABR07073038.2 | -1.34 | 17 | 1.31 | 18 | 0.98 |   |

Supplemental Table 3  
 FSH + Ad-E versus FSH + Ad-FOXO1(A3), 24 hours

|      | A          | B     | C   | D     | E   | F     | G |
|------|------------|-------|-----|-------|-----|-------|---|
| 9762 | Aanat      | -1.34 | 2   | 0.55  | 2   | 0.41  |   |
| 9763 | Abcb9      | -1.34 | 5   | 0.13  | 3   | 0.1   |   |
| 9764 | Abcc1      | -1.34 | 1   | 2.48  | 3   | 1.85  |   |
| 9765 | Abcg2      | -1.34 | 15  | 1.85  | 15  | 1.38  |   |
| 9766 | AC097939.1 | -1.34 | 0   | 8.62  | 0   | 6.45  |   |
| 9767 | AC107446.2 | -1.34 | 0   | 0.4   | 0   | 0.3   |   |
| 9768 | AC114343.2 | -1.34 | 0   | 0.3   | 0   | 0.23  |   |
| 9769 | AC114452.1 | -1.34 | 1   | 0.27  | 1   | 0.2   |   |
| 9770 | AC117058.1 | -1.34 | 0   | 0.27  | 0   | 0.2   |   |
| 9771 | AC120310.3 | -1.34 | 0   | 1.69  | 0   | 1.27  |   |
| 9772 | AC125982.1 | -1.34 | 1   | 1.09  | 0   | 0.81  |   |
| 9773 | AC126572.4 | -1.34 | 5   | 0.74  | 1   | 0.55  |   |
| 9774 | AC127784.1 | -1.34 | 0   | 2.9   | 0   | 2.17  |   |
| 9775 | AC239701.1 | -1.34 | 1   | 0.07  | 1   | 0.05  |   |
| 9776 | ACEA_U3_3  | -1.34 | 0   | 1.68  | 0   | 1.25  |   |
| 9777 | ACEA_U3_5  | -1.34 | 0   | 5.03  | 0   | 3.76  |   |
| 9778 | Ackr4      | -1.34 | 0   | 0.36  | 0   | 0.27  |   |
| 9779 | Acot7      | -1.34 | 69  | 9.84  | 78  | 7.35  |   |
| 9780 | Acpt       | -1.34 | 7   | 0.24  | 5   | 0.18  |   |
| 9781 | Actl7b     | -1.34 | 3   | 0.78  | 3   | 0.59  |   |
| 9782 | Actrt3     | -1.34 | 2   | 0.59  | 2   | 0.44  |   |
| 9783 | Adam4      | -1.34 | 1   | 0.15  | 1   | 0.11  |   |
| 9784 | Adamts4    | -1.34 | 5   | 0.32  | 5   | 0.24  |   |
| 9785 | Adamts9    | -1.34 | 11  | 0.23  | 9   | 0.17  |   |
| 9786 | Adat1      | -1.34 | 31  | 1.36  | 28  | 1.02  |   |
| 9787 | Add2       | -1.34 | 296 | 0.08  | 360 | 0.06  |   |
| 9788 | Adra2a     | -1.34 | 5   | 0.65  | 5   | 0.48  |   |
| 9789 | Adra2c     | -1.34 | 1   | 0.21  | 1   | 0.16  |   |
| 9790 | Aff1       | -1.34 | 202 | 10.55 | 201 | 7.89  |   |
| 9791 | Agxt2      | -1.34 | 2   | 0.16  | 3   | 0.12  |   |
| 9792 | Ak4        | -1.34 | 11  | 2.83  | 15  | 2.11  |   |
| 9793 | Akap6      | -1.34 | 24  | 0.04  | 11  | 0.03  |   |
| 9794 | Aldoc      | -1.34 | 16  | 3.44  | 16  | 2.57  |   |
| 9795 | Alkbh7     | -1.34 | 15  | 4.02  | 12  | 3     |   |
| 9796 | Alox12     | -1.34 | 1   | 0.12  | 2   | 0.09  |   |
| 9797 | Alox15     | -1.34 | 1   | 0.16  | 1   | 0.12  |   |
| 9798 | Alpk2      | -1.34 | 4   | 0.06  | 2   | 0.04  |   |
| 9799 | Amica1     | -1.34 | 5   | 0.67  | 5   | 0.5   |   |
| 9800 | Angptl6    | -1.34 | 1   | 0.23  | 2   | 0.17  |   |
| 9801 | Ankrd33b   | -1.34 | 5   | 0.18  | 3   | 0.14  |   |
| 9802 | Ankrd34a   | -1.34 | 3   | 0.38  | 3   | 0.28  |   |
| 9803 | Ankrd39    | -1.34 | 8   | 0.54  | 10  | 0.4   |   |
| 9804 | Apba3      | -1.34 | 101 | 17.51 | 103 | 13.09 |   |
| 9805 | Apip       | -1.34 | 6   | 1.49  | 8   | 1.12  |   |
| 9806 | Apln       | -1.34 | 4   | 0.35  | 4   | 0.26  |   |
| 9807 | Aqp11      | -1.34 | 1   | 0.28  | 3   | 0.21  |   |
| 9808 | Arhgap19   | -1.34 | 42  | 2.86  | 45  | 2.14  |   |
| 9809 | Arhgap26   | -1.34 | 37  | 0.96  | 44  | 0.72  |   |
| 9810 | Arhgap8    | -1.34 | 4   | 0.14  | 2   | 0.11  |   |
| 9811 | Arhgef15   | -1.34 | 1   | 0.09  | 3   | 0.06  |   |
| 9812 | Arhgef3    | -1.34 | 80  | 2.62  | 95  | 1.96  |   |
| 9813 | Arhgef33   | -1.34 | 4   | 0.14  | 6   | 0.11  |   |
| 9814 | Armxc1_1   | -1.34 | 0   | 0.41  | 0   | 0.31  |   |
| 9815 | Arrdc3     | -1.34 | 53  | 11.22 | 54  | 8.39  |   |

Supplemental Table 3  
 FSH + Ad-E versus FSH + Ad-FOXO1(A3), 24 hours

|      | A          | B     | C   | D     | E   | F     | G |
|------|------------|-------|-----|-------|-----|-------|---|
| 9816 | Arsj       | -1.34 | 1   | 0.26  | 1   | 0.19  |   |
| 9817 | Asb13      | -1.34 | 32  | 5.32  | 42  | 3.97  |   |
| 9818 | Asf1b      | -1.34 | 15  | 3.2   | 17  | 2.39  |   |
| 9819 | Atg9a      | -1.34 | 262 | 22.08 | 261 | 16.51 |   |
| 9820 | Atn1       | -1.34 | 0   | 0.71  | 1   | 0.53  |   |
| 9821 | Atp5s      | -1.34 | 14  | 1.82  | 22  | 1.36  |   |
| 9822 | Atp5sl     | -1.34 | 50  | 6.47  | 42  | 4.83  |   |
| 9823 | Atp6v1b1   | -1.34 | 8   | 0.24  | 15  | 0.18  |   |
| 9824 | Atp7b      | -1.34 | 10  | 0.42  | 10  | 0.32  |   |
| 9825 | Atrip      | -1.34 | 46  | 5.06  | 40  | 3.78  |   |
| 9826 | Axin2      | -1.34 | 12  | 0.82  | 10  | 0.61  |   |
| 9827 | AY172581.5 | -1.34 | 1   | 5.32  | 1   | 3.98  |   |
| 9828 | Bbip1      | -1.34 | 1   | 1.8   | 3   | 1.35  |   |
| 9829 | Bbox1      | -1.34 | 1   | 0.15  | 1   | 0.12  |   |
| 9830 | Bbs5       | -1.34 | 37  | 3.71  | 25  | 2.77  |   |
| 9831 | Bdkrb2     | -1.34 | 2   | 0.18  | 8   | 0.13  |   |
| 9832 | Bfsp1      | -1.34 | 2   | 0.17  | 2   | 0.13  |   |
| 9833 | Bik        | -1.34 | 3   | 0.38  | 3   | 0.28  |   |
| 9834 | Brat1      | -1.34 | 16  | 2.36  | 14  | 1.76  |   |
| 9835 | Brinp1     | -1.34 | 8   | 0.22  | 8   | 0.17  |   |
| 9836 | Btnl5_2    | -1.34 | 0   | 0.39  | 0   | 0.29  |   |
| 9837 | C1ql3      | -1.34 | 2   | 0.47  | 5   | 0.35  |   |
| 9838 | C1qtnf5    | -1.34 | 1   | 0.27  | 1   | 0.2   |   |
| 9839 | C2_1       | -1.34 | 1   | 0.22  | 0   | 0.16  |   |
| 9840 | C5ar2      | -1.34 | 1   | 0.28  | 4   | 0.21  |   |
| 9841 | Cacna1b    | -1.34 | 5   | 0.04  | 1   | 0.03  |   |
| 9842 | Cacna1e    | -1.34 | 46  | 0.05  | 75  | 0.04  |   |
| 9843 | Cadps      | -1.34 | 29  | 0.63  | 28  | 0.47  |   |
| 9844 | Capg       | -1.34 | 22  | 5.15  | 22  | 3.85  |   |
| 9845 | Capn8      | -1.34 | 6   | 0.11  | 3   | 0.08  |   |
| 9846 | Car11      | -1.34 | 13  | 1.36  | 9   | 1.02  |   |
| 9847 | Carns1     | -1.34 | 4   | 0.38  | 3   | 0.28  |   |
| 9848 | Ccbl1      | -1.34 | 52  | 11.24 | 50  | 8.41  |   |
| 9849 | Ccdc18     | -1.34 | 18  | 0.5   | 23  | 0.37  |   |
| 9850 | Ccdc88b    | -1.34 | 2   | 0.06  | 2   | 0.05  |   |
| 9851 | Ccdc96     | -1.34 | 1   | 0.2   | 1   | 0.15  |   |
| 9852 | Ccno       | -1.34 | 1   | 0.19  | 1   | 0.14  |   |
| 9853 | Cd4        | -1.34 | 1   | 0.21  | 5   | 0.15  |   |
| 9854 | Cdh6       | -1.34 | 2   | 0.15  | 2   | 0.11  |   |
| 9855 | Cdnf       | -1.34 | 1   | 0.13  | 5   | 0.1   |   |
| 9856 | Ceacam10_2 | -1.34 | 0   | 0.5   | 0   | 0.37  |   |
| 9857 | Celsr1     | -1.34 | 52  | 1.83  | 55  | 1.37  |   |
| 9858 | Celsr3     | -1.34 | 2   | 0.03  | 2   | 0.02  |   |
| 9859 | Cenpo      | -1.34 | 6   | 1.86  | 5   | 1.39  |   |
| 9860 | Cenpv      | -1.34 | 91  | 13.94 | 100 | 10.43 |   |
| 9861 | Cercam     | -1.34 | 15  | 1.86  | 16  | 1.39  |   |
| 9862 | Cers4      | -1.34 | 74  | 6.7   | 78  | 5.01  |   |
| 9863 | Cfd        | -1.34 | 1   | 0.38  | 0   | 0.29  |   |
| 9864 | Chic1      | -1.34 | 29  | 1.23  | 36  | 0.92  |   |
| 9865 | Clca4l     | -1.34 | 4   | 0.13  | 4   | 0.09  |   |
| 9866 | Cmklr1     | -1.34 | 1   | 0.14  | 1   | 0.11  |   |
| 9867 | Cnr2       | -1.34 | 2   | 0.24  | 2   | 0.18  |   |
| 9868 | Cntnap3    | -1.34 | 29  | 2.28  | 26  | 1.71  |   |
| 9869 | Col9a2     | -1.34 | 6   | 0.12  | 11  | 0.09  |   |

Supplemental Table 3  
 FSH + Ad-E versus FSH + Ad-FOXO1(A3), 24 hours

|      | A         | B     | C   | D     | E   | F     | G |
|------|-----------|-------|-----|-------|-----|-------|---|
| 9870 | Commd2    | -1.34 | 52  | 7.9   | 55  | 5.91  |   |
| 9871 | Coprs     | -1.34 | 9   | 5.25  | 13  | 3.92  |   |
| 9872 | Coro2a    | -1.34 | 1   | 0.15  | 2   | 0.12  |   |
| 9873 | Cox6b1_2  | -1.34 | 8   | 15.26 | 8   | 11.41 |   |
| 9874 | Crb2      | -1.34 | 5   | 0.38  | 5   | 0.28  |   |
| 9875 | Crhr2     | -1.34 | 2   | 0.12  | 1   | 0.09  |   |
| 9876 | Cryba1    | -1.34 | 4   | 0.47  | 10  | 0.35  |   |
| 9877 | Cryba4    | -1.34 | 1   | 0.45  | 1   | 0.34  |   |
| 9878 | Csf1r     | -1.34 | 4   | 0.27  | 12  | 0.2   |   |
| 9879 | Cthrc1    | -1.34 | 2   | 0.6   | 2   | 0.45  |   |
| 9880 | Ctnnd2    | -1.34 | 14  | 0.08  | 11  | 0.06  |   |
| 9881 | Cyb5rl    | -1.34 | 8   | 1.12  | 5   | 0.84  |   |
| 9882 | Cyp4f37_1 | -1.34 | 0   | 0.46  | 0   | 0.34  |   |
| 9883 | Dact2     | -1.34 | 2   | 0.23  | 3   | 0.17  |   |
| 9884 | Dclk2     | -1.34 | 29  | 0.95  | 49  | 0.71  |   |
| 9885 | Ddx25     | -1.34 | 30  | 5.67  | 30  | 4.24  |   |
| 9886 | Ddx58     | -1.34 | 22  | 3.63  | 27  | 2.72  |   |
| 9887 | Ddx60     | -1.34 | 3   | 0.09  | 4   | 0.07  |   |
| 9888 | Dhx16     | -1.34 | 91  | 7.73  | 87  | 5.78  |   |
| 9889 | Dmrtc1a   | -1.34 | 1   | 0.33  | 1   | 0.25  |   |
| 9890 | Dnase1l2  | -1.34 | 2   | 0.87  | 2   | 0.65  |   |
| 9891 | Dok6      | -1.34 | 26  | 0.5   | 43  | 0.37  |   |
| 9892 | Dpp4      | -1.34 | 2   | 0.07  | 2   | 0.06  |   |
| 9893 | Dram1     | -1.34 | 7   | 0.92  | 10  | 0.69  |   |
| 9894 | Dusp14    | -1.34 | 3   | 0.96  | 6   | 0.72  |   |
| 9895 | Dusp9     | -1.34 | 1   | 0.14  | 1   | 0.1   |   |
| 9896 | Dync1i1   | -1.34 | 15  | 0.68  | 17  | 0.51  |   |
| 9897 | Ebi3      | -1.34 | 1   | 0.3   | 1   | 0.22  |   |
| 9898 | Edil3     | -1.34 | 15  | 0.82  | 26  | 0.61  |   |
| 9899 | Efcab1    | -1.34 | 1   | 0.3   | 1   | 0.23  |   |
| 9900 | Efhc2     | -1.34 | 7   | 0.25  | 8   | 0.19  |   |
| 9901 | Egf       | -1.34 | 2   | 0.17  | 1   | 0.13  |   |
| 9902 | Egr3      | -1.34 | 2   | 0.27  | 2   | 0.2   |   |
| 9903 | Eno4      | -1.34 | 1   | 0.15  | 3   | 0.11  |   |
| 9904 | Enpp3     | -1.34 | 4   | 0.26  | 4   | 0.2   |   |
| 9905 | Entpd2    | -1.34 | 4   | 0.38  | 4   | 0.28  |   |
| 9906 | Entpd8    | -1.34 | 1   | 0.07  | 3   | 0.05  |   |
| 9907 | Epha4     | -1.34 | 17  | 0.63  | 14  | 0.47  |   |
| 9908 | Epm2a     | -1.34 | 8   | 0.63  | 10  | 0.47  |   |
| 9909 | Eqtn      | -1.34 | 1   | 0.35  | 1   | 0.26  |   |
| 9910 | Ero1lb    | -1.34 | 11  | 1.12  | 12  | 0.84  |   |
| 9911 | Esyt3     | -1.34 | 6   | 0.31  | 8   | 0.23  |   |
| 9912 | Exoc7_1   | -1.34 | 0   | 3.32  | 0   | 2.48  |   |
| 9913 | Fam134b_2 | -1.34 | 0   | 0.69  | 0   | 0.52  |   |
| 9914 | Fam160b2  | -1.34 | 189 | 15.51 | 181 | 11.59 |   |
| 9915 | Fam173a   | -1.34 | 26  | 7.32  | 31  | 5.47  |   |
| 9916 | Fam212b   | -1.34 | 7   | 0.64  | 6   | 0.48  |   |
| 9917 | Fam217a   | -1.34 | 1   | 0.24  | 4   | 0.18  |   |
| 9918 | Fam57b    | -1.34 | 2   | 0.21  | 2   | 0.16  |   |
| 9919 | Far2      | -1.34 | 8   | 0.25  | 8   | 0.19  |   |
| 9920 | Fblim1    | -1.34 | 5   | 0.36  | 4   | 0.27  |   |
| 9921 | Fbxl22    | -1.34 | 2   | 0.08  | 8   | 0.06  |   |
| 9922 | Fbxw12    | -1.34 | 2   | 0.25  | 1   | 0.19  |   |
| 9923 | Fgf2      | -1.34 | 1   | 0.29  | 2   | 0.21  |   |



Supplemental Table 3  
FSH + Ad-E versus FSH + Ad-FOXO1(A3), 24 hours

|      | A        | B     | C   | D     | E   | F     | G |
|------|----------|-------|-----|-------|-----|-------|---|
| 9924 | Foxo6    | -1.34 | 4   | 0.19  | 2   | 0.14  |   |
| 9925 | Fsbp     | -1.34 | 1   | 0.81  | 0   | 0.6   |   |
| 9926 | Fstl3    | -1.34 | 5   | 0.95  | 5   | 0.71  |   |
| 9927 | Fuom     | -1.34 | 0   | 0.16  | 0   | 0.12  |   |
| 9928 | Fxyd1    | -1.34 | 1   | 0.68  | 1   | 0.51  |   |
| 9929 | Gabrb2   | -1.34 | 7   | 0.17  | 6   | 0.13  |   |
| 9930 | Galnt12  | -1.34 | 5   | 1.04  | 8   | 0.78  |   |
| 9931 | Galnt14  | -1.34 | 8   | 0.16  | 10  | 0.12  |   |
| 9932 | Galnt16  | -1.34 | 26  | 1.22  | 51  | 0.91  |   |
| 9933 | Galnt18  | -1.34 | 14  | 0.29  | 11  | 0.22  |   |
| 9934 | Galnt3   | -1.34 | 6   | 0.48  | 6   | 0.36  |   |
| 9935 | Garnl3   | -1.34 | 22  | 1.16  | 37  | 0.87  |   |
| 9936 | Gata3    | -1.34 | 7   | 0.68  | 8   | 0.51  |   |
| 9937 | Gdf6     | -1.34 | 3   | 0.31  | 3   | 0.23  |   |
| 9938 | Gfod1    | -1.34 | 22  | 3.44  | 61  | 2.57  |   |
| 9939 | Gfod2    | -1.34 | 55  | 4.08  | 72  | 3.05  |   |
| 9940 | Gins3    | -1.34 | 20  | 2.88  | 21  | 2.15  |   |
| 9941 | Glr3     | -1.34 | 152 | 31.01 | 167 | 23.19 |   |
| 9942 | Gm1045   | -1.34 | 2   | 1.9   | 4   | 1.42  |   |
| 9943 | Gmnc     | -1.34 | 1   | 0.13  | 1   | 0.1   |   |
| 9944 | Gne      | -1.34 | 95  | 9.54  | 94  | 7.14  |   |
| 9945 | Gpr156   | -1.34 | 7   | 0.15  | 9   | 0.11  |   |
| 9946 | Gprin2   | -1.34 | 2   | 0.53  | 2   | 0.4   |   |
| 9947 | Gramd4   | -1.34 | 21  | 1.41  | 21  | 1.06  |   |
| 9948 | Grb7     | -1.34 | 2   | 0.13  | 2   | 0.09  |   |
| 9949 | Grm8     | -1.34 | 33  | 0.09  | 41  | 0.07  |   |
| 9950 | Has1     | -1.34 | 14  | 0.86  | 16  | 0.65  |   |
| 9951 | Hbq1b    | -1.34 | 9   | 7.54  | 10  | 5.64  |   |
| 9952 | Hcn3     | -1.34 | 7   | 0.45  | 6   | 0.34  |   |
| 9953 | Hdx      | -1.34 | 15  | 1.12  | 21  | 0.84  |   |
| 9954 | Hk3      | -1.34 | 1   | 0.11  | 1   | 0.08  |   |
| 9955 | Hoxc8    | -1.34 | 2   | 0.34  | 3   | 0.25  |   |
| 9956 | Hspa12b  | -1.34 | 6   | 0.3   | 6   | 0.23  |   |
| 9957 | Iba57    | -1.34 | 57  | 3.78  | 71  | 2.83  |   |
| 9958 | Ift22    | -1.34 | 32  | 6.65  | 38  | 4.97  |   |
| 9959 | Igf2bp1  | -1.34 | 2   | 0.17  | 2   | 0.13  |   |
| 9960 | Ikzf4    | -1.34 | 10  | 1.44  | 12  | 1.08  |   |
| 9961 | Il18     | -1.34 | 8   | 0.72  | 11  | 0.54  |   |
| 9962 | Il1rn    | -1.34 | 2   | 0.18  | 1   | 0.13  |   |
| 9963 | Il27ra   | -1.34 | 21  | 1.28  | 20  | 0.96  |   |
| 9964 | Inpp1    | -1.34 | 43  | 2.91  | 48  | 2.18  |   |
| 9965 | Iqch     | -1.34 | 31  | 0.18  | 28  | 0.14  |   |
| 9966 | Irgb2    | -1.34 | 3   | 0.11  | 2   | 0.09  |   |
| 9967 | Jph1     | -1.34 | 31  | 1.62  | 37  | 1.21  |   |
| 9968 | Kank3    | -1.34 | 12  | 1.21  | 13  | 0.9   |   |
| 9969 | Kank4    | -1.34 | 10  | 0.23  | 8   | 0.17  |   |
| 9970 | Katna1   | -1.34 | 62  | 6.62  | 88  | 4.95  |   |
| 9971 | Kazald1  | -1.34 | 7   | 1.12  | 7   | 0.83  |   |
| 9972 | Kbtbd6_2 | -1.34 | 0   | 1.03  | 0   | 0.77  |   |
| 9973 | Kcng4    | -1.34 | 1   | 0.09  | 1   | 0.07  |   |
| 9974 | Kcnip3   | -1.34 | 8   | 0.58  | 6   | 0.43  |   |
| 9975 | Kctd1    | -1.34 | 150 | 8.65  | 138 | 6.47  |   |
| 9976 | Kif22    | -1.34 | 68  | 9.07  | 67  | 6.78  |   |
| 9977 | Kiss1    | -1.34 | 3   | 0.37  | 4   | 0.28  |   |

Supplemental Table 3  
 FSH + Ad-E versus FSH + Ad-FOXO1(A3), 24 hours

|       | A              | B     | C   | D     | E   | F     | G |
|-------|----------------|-------|-----|-------|-----|-------|---|
| 9978  | Klf1           | -1.34 | 4   | 0.48  | 4   | 0.36  |   |
| 9979  | Klk5l_2        | -1.34 | 0   | 0.52  | 0   | 0.39  |   |
| 9980  | Kpna5          | -1.34 | 72  | 4.19  | 92  | 3.13  |   |
| 9981  | Lama3          | -1.34 | 5   | 0.14  | 3   | 0.1   |   |
| 9982  | Lamb3          | -1.34 | 3   | 0.17  | 3   | 0.13  |   |
| 9983  | Ldlrad1        | -1.34 | 10  | 1.75  | 15  | 1.31  |   |
| 9984  | Lenep          | -1.34 | 1   | 1.24  | 0   | 0.93  |   |
| 9985  | Leng9          | -1.34 | 11  | 1.74  | 9   | 1.3   |   |
| 9986  | Leprot         | -1.34 | 24  | 14.71 | 19  | 11    |   |
| 9987  | Lfng           | -1.34 | 3   | 0.34  | 4   | 0.25  |   |
| 9988  | Lmx1b          | -1.34 | 5   | 0.3   | 2   | 0.23  |   |
| 9989  | LOC100360002   | -1.34 | 0   | 4.7   | 0   | 3.52  |   |
| 9990  | LOC100360200   | -1.34 | 1   | 0.69  | 1   | 0.52  |   |
| 9991  | LOC100360274   | -1.34 | 102 | 0.35  | 201 | 0.26  |   |
| 9992  | LOC100360432_1 | -1.34 | 0   | 2.17  | 0   | 1.62  |   |
| 9993  | LOC100360432_2 | -1.34 | 0   | 3.77  | 0   | 2.82  |   |
| 9994  | LOC100360835   | -1.34 | 5   | 5.32  | 3   | 3.98  |   |
| 9995  | LOC100360843   | -1.34 | 0   | 0.82  | 0   | 0.61  |   |
| 9996  | LOC100361060   | -1.34 | 0   | 4.51  | 0   | 3.37  |   |
| 9997  | LOC100361079   | -1.34 | 0   | 2.39  | 0   | 1.79  |   |
| 9998  | LOC100362298   | -1.34 | 0   | 8.68  | 0   | 6.49  |   |
| 9999  | LOC100363043   | -1.34 | 107 | 34.72 | 110 | 25.96 |   |
| 10000 | LOC100363268   | -1.34 | 1   | 1.13  | 0   | 0.84  |   |
| 10001 | LOC100366140_2 | -1.34 | 0   | 0.23  | 0   | 0.17  |   |
| 10002 | LOC100910214   | -1.34 | 0   | 0.24  | 0   | 0.18  |   |
| 10003 | LOC100910308   | -1.34 | 0   | 0.33  | 0   | 0.25  |   |
| 10004 | LOC100910316   | -1.34 | 2   | 0.71  | 2   | 0.53  |   |
| 10005 | LOC100910472   | -1.34 | 10  | 7.71  | 8   | 5.76  |   |
| 10006 | LOC100910526_2 | -1.34 | 1   | 0.12  | 0   | 0.09  |   |
| 10007 | LOC100911145   | -1.34 | 0   | 0.15  | 0   | 0.11  |   |
| 10008 | LOC100911337   | -1.34 | 0   | 1.92  | 0   | 1.43  |   |
| 10009 | LOC100911456   | -1.34 | 0   | 0.62  | 0   | 0.46  |   |
| 10010 | LOC100911951   | -1.34 | 0   | 0.14  | 0   | 0.11  |   |
| 10011 | LOC100912609_2 | -1.34 | 0   | 0.54  | 0   | 0.4   |   |
| 10012 | LOC102551255   | -1.34 | 1   | 0.48  | 1   | 0.36  |   |
| 10013 | LOC103689982   | -1.34 | 23  | 8.87  | 20  | 6.63  |   |
| 10014 | LOC307727      | -1.34 | 1   | 1.16  | 1   | 0.87  |   |
| 10015 | LOC498300      | -1.34 | 2   | 0.41  | 3   | 0.31  |   |
| 10016 | LOC500148      | -1.34 | 1   | 0.28  | 2   | 0.21  |   |
| 10017 | LOC679247      | -1.34 | 2   | 0.52  | 3   | 0.39  |   |
| 10018 | LOC679683      | -1.34 | 1   | 2.25  | 0   | 1.68  |   |
| 10019 | LOC681338      | -1.34 | 0   | 0.96  | 0   | 0.72  |   |
| 10020 | LOC681458      | -1.34 | 4   | 0.3   | 5   | 0.23  |   |
| 10021 | LOC685431_2    | -1.34 | 0   | 1.39  | 2   | 1.04  |   |
| 10022 | LOC688286      | -1.34 | 14  | 0.91  | 8   | 0.68  |   |
| 10023 | LOC688672      | -1.34 | 1   | 1.19  | 2   | 0.89  |   |
| 10024 | LOC690276      | -1.34 | 3   | 0.52  | 6   | 0.39  |   |
| 10025 | LOC691422      | -1.34 | 13  | 2.42  | 13  | 1.81  |   |
| 10026 | Loxl4          | -1.34 | 4   | 0.25  | 2   | 0.18  |   |
| 10027 | Lrrc14b        | -1.34 | 7   | 0.98  | 9   | 0.74  |   |
| 10028 | Lrrc32         | -1.34 | 1   | 0.09  | 1   | 0.07  |   |
| 10029 | Lrrc39         | -1.34 | 3   | 0.5   | 13  | 0.38  |   |
| 10030 | Lypd3          | -1.34 | 5   | 1.08  | 5   | 0.8   |   |
| 10031 | Lypla2         | -1.34 | 92  | 20.49 | 88  | 15.32 |   |

Supplemental Table 3  
 FSH + Ad-E versus FSH + Ad-FOXO1(A3), 24 hours

|       | A         | B     | C   | D     | E   | F     | G |
|-------|-----------|-------|-----|-------|-----|-------|---|
| 10032 | Mad111    | -1.34 | 96  | 5.96  | 92  | 4.46  |   |
| 10033 | Mag       | -1.34 | 3   | 0.42  | 4   | 0.32  |   |
| 10034 | Magi2     | -1.34 | 70  | 0.69  | 66  | 0.52  |   |
| 10035 | Mak       | -1.34 | 3   | 0.22  | 2   | 0.17  |   |
| 10036 | March9    | -1.34 | 16  | 6.83  | 21  | 5.11  |   |
| 10037 | Mecom     | -1.34 | 1   | 0.07  | 2   | 0.06  |   |
| 10038 | Metrn     | -1.34 | 3   | 1.18  | 3   | 0.88  |   |
| 10039 | MGC116197 | -1.34 | 1   | 0.26  | 1   | 0.19  |   |
| 10040 | Micalcl   | -1.34 | 23  | 1.74  | 25  | 1.3   |   |
| 10041 | Mmp19     | -1.34 | 40  | 7.22  | 44  | 5.4   |   |
| 10042 | Mmp2      | -1.34 | 9   | 1.06  | 9   | 0.79  |   |
| 10043 | Mobp      | -1.34 | 2   | 0.09  | 1   | 0.07  |   |
| 10044 | Mogat1    | -1.34 | 2   | 0.9   | 3   | 0.68  |   |
| 10045 | Morn4     | -1.34 | 32  | 6.41  | 34  | 4.79  |   |
| 10046 | Mroh2a    | -1.34 | 7   | 0.07  | 5   | 0.05  |   |
| 10047 | Mrpl35    | -1.34 | 49  | 10.66 | 53  | 7.97  |   |
| 10048 | mrt3      | -1.34 | 1   | 1.22  | 1   | 0.91  |   |
| 10049 | Msl3l2    | -1.34 | 0   | 0.24  | 0   | 0.18  |   |
| 10050 | Mtbp      | -1.34 | 42  | 2.97  | 39  | 2.22  |   |
| 10051 | Murc      | -1.34 | 1   | 0.09  | 2   | 0.07  |   |
| 10052 | Myh14     | -1.34 | 3   | 0.16  | 7   | 0.12  |   |
| 10053 | Mylk3     | -1.34 | 2   | 0.13  | 4   | 0.1   |   |
| 10054 | Myo16     | -1.34 | 11  | 0.05  | 9   | 0.04  |   |
| 10055 | Myo1g     | -1.34 | 1   | 0.11  | 2   | 0.08  |   |
| 10056 | Mypn      | -1.34 | 1   | 0.07  | 3   | 0.05  |   |
| 10057 | Naa10     | -1.34 | 32  | 8.11  | 42  | 6.06  |   |
| 10058 | Ncapg     | -1.34 | 42  | 2.38  | 47  | 1.78  |   |
| 10059 | Ncf2      | -1.34 | 8   | 0.76  | 6   | 0.57  |   |
| 10060 | Ndufaf7   | -1.34 | 20  | 2.6   | 23  | 1.94  |   |
| 10061 | Ndufv1    | -1.34 | 141 | 30.49 | 141 | 22.8  |   |
| 10062 | Necab2    | -1.34 | 3   | 0.23  | 5   | 0.17  |   |
| 10063 | Nefh      | -1.34 | 4   | 0.38  | 4   | 0.28  |   |
| 10064 | Nefm      | -1.34 | 4   | 0.47  | 4   | 0.35  |   |
| 10065 | Neu2      | -1.34 | 4   | 0.2   | 2   | 0.15  |   |
| 10066 | Neurl1b   | -1.34 | 3   | 0.44  | 6   | 0.33  |   |
| 10067 | Ngfr      | -1.34 | 1   | 0.11  | 1   | 0.08  |   |
| 10068 | Nlrp5     | -1.34 | 5   | 0.37  | 4   | 0.28  |   |
| 10069 | Nme5      | -1.34 | 5   | 0.24  | 8   | 0.18  |   |
| 10070 | Nmi       | -1.34 | 35  | 13.37 | 52  | 10    |   |
| 10071 | Nmnat3    | -1.34 | 6   | 0.17  | 6   | 0.13  |   |
| 10072 | Nol4      | -1.34 | 9   | 0.07  | 5   | 0.05  |   |
| 10073 | Npffr1    | -1.34 | 1   | 0.28  | 2   | 0.21  |   |
| 10074 | Npm2      | -1.34 | 2   | 1.16  | 2   | 0.87  |   |
| 10075 | Nptx1     | -1.34 | 6   | 0.46  | 6   | 0.34  |   |
| 10076 | Nrcam     | -1.34 | 2   | 0.05  | 4   | 0.04  |   |
| 10077 | Ntf4      | -1.34 | 1   | 0.27  | 1   | 0.2   |   |
| 10078 | Ntng2     | -1.34 | 1   | 0.14  | 3   | 0.11  |   |
| 10079 | Nubp2     | -1.34 | 83  | 20.58 | 81  | 15.38 |   |
| 10080 | Nuf2      | -1.34 | 32  | 4.98  | 34  | 3.72  |   |
| 10081 | Oas1k     | -1.34 | 7   | 0.28  | 10  | 0.21  |   |
| 10082 | Ocel1     | -1.34 | 6   | 1.71  | 6   | 1.28  |   |
| 10083 | Olr1129   | -1.34 | 1   | 0.38  | 1   | 0.28  |   |
| 10084 | Olr1461   | -1.34 | 2   | 0.78  | 2   | 0.58  |   |
| 10085 | Olr201    | -1.34 | 1   | 0.38  | 1   | 0.29  |   |

Supplemental Table 3  
 FSH + Ad-E versus FSH + Ad-FOXO1(A3), 24 hours

|       | A          | B     | C   | D     | E   | F     | G |
|-------|------------|-------|-----|-------|-----|-------|---|
| 10086 | Ooep       | -1.34 | 3   | 1.33  | 3   | 1     |   |
| 10087 | Orc1       | -1.34 | 34  | 1.84  | 44  | 1.38  |   |
| 10088 | Oxld1      | -1.34 | 9   | 3.45  | 8   | 2.58  |   |
| 10089 | P2rx3      | -1.34 | 4   | 0.28  | 6   | 0.21  |   |
| 10090 | Paip2l1    | -1.34 | 0   | 0.97  | 0   | 0.73  |   |
| 10091 | Pak6       | -1.34 | 6   | 0.15  | 3   | 0.12  |   |
| 10092 | Papd7      | -1.34 | 139 | 12.42 | 158 | 9.29  |   |
| 10093 | Paqr7      | -1.34 | 120 | 17.03 | 126 | 12.73 |   |
| 10094 | Parvb      | -1.34 | 12  | 0.67  | 13  | 0.5   |   |
| 10095 | Pcdhb9     | -1.34 | 4   | 0.57  | 4   | 0.43  |   |
| 10096 | Pcnxl2     | -1.34 | 7   | 0.06  | 4   | 0.04  |   |
| 10097 | Pcsk1n     | -1.34 | 0   | 0.46  | 0   | 0.35  |   |
| 10098 | Pde2a      | -1.34 | 2   | 0.08  | 1   | 0.06  |   |
| 10099 | Pde6b      | -1.34 | 5   | 0.13  | 2   | 0.1   |   |
| 10100 | Pde9a      | -1.34 | 18  | 1.28  | 15  | 0.96  |   |
| 10101 | Pdyn       | -1.34 | 1   | 0.15  | 1   | 0.11  |   |
| 10102 | Pdzd9      | -1.34 | 3   | 0.31  | 5   | 0.23  |   |
| 10103 | Pfkl       | -1.34 | 238 | 29.2  | 237 | 21.83 |   |
| 10104 | Pgbd5      | -1.34 | 6   | 0.18  | 3   | 0.13  |   |
| 10105 | Pgs1       | -1.34 | 117 | 13.63 | 130 | 10.19 |   |
| 10106 | Phkg1      | -1.34 | 5   | 0.7   | 4   | 0.52  |   |
| 10107 | Phtf1      | -1.34 | 127 | 13.78 | 146 | 10.3  |   |
| 10108 | Phtf2      | -1.34 | 141 | 8.58  | 167 | 6.42  |   |
| 10109 | Piezo1     | -1.34 | 15  | 0.62  | 16  | 0.46  |   |
| 10110 | Pim2       | -1.34 | 12  | 1.52  | 11  | 1.14  |   |
| 10111 | Piwil1     | -1.34 | 2   | 0.18  | 3   | 0.14  |   |
| 10112 | Plekha6    | -1.34 | 9   | 0.37  | 7   | 0.28  |   |
| 10113 | Plekha1    | -1.34 | 21  | 0.75  | 36  | 0.56  |   |
| 10114 | Plekha4    | -1.34 | 2   | 0.19  | 2   | 0.14  |   |
| 10115 | Pmp22      | -1.34 | 22  | 3.84  | 22  | 2.87  |   |
| 10116 | Pno1       | -1.34 | 22  | 9.57  | 13  | 7.16  |   |
| 10117 | Pnpla3     | -1.34 | 2   | 0.11  | 4   | 0.08  |   |
| 10118 | Ppidl1     | -1.34 | 3   | 0.82  | 2   | 0.61  |   |
| 10119 | Ppif       | -1.34 | 65  | 12.71 | 62  | 9.5   |   |
| 10120 | Ppp1r14d   | -1.34 | 14  | 0.6   | 13  | 0.45  |   |
| 10121 | Ppp1r36    | -1.34 | 13  | 2.19  | 14  | 1.64  |   |
| 10122 | Ppp2r2c    | -1.34 | 173 | 0.22  | 284 | 0.16  |   |
| 10123 | Prdm8      | -1.34 | 4   | 0.7   | 4   | 0.52  |   |
| 10124 | Prkcg      | -1.34 | 7   | 0.47  | 9   | 0.35  |   |
| 10125 | Prom1      | -1.34 | 7   | 0.15  | 7   | 0.11  |   |
| 10126 | Prox1      | -1.34 | 6   | 0.2   | 6   | 0.15  |   |
| 10127 | Ptcd2      | -1.34 | 44  | 4.69  | 53  | 3.5   |   |
| 10128 | Ptprr      | -1.34 | 33  | 0.1   | 26  | 0.07  |   |
| 10129 | Rab26      | -1.34 | 8   | 1.09  | 9   | 0.82  |   |
| 10130 | Rad51b     | -1.34 | 5   | 1.43  | 2   | 1.07  |   |
| 10131 | Ranbp3l    | -1.34 | 1   | 0.17  | 1   | 0.13  |   |
| 10132 | Rarres2    | -1.34 | 5   | 2.67  | 4   | 2     |   |
| 10133 | Rbm28      | -1.34 | 107 | 7     | 109 | 5.23  |   |
| 10134 | Rcan3      | -1.34 | 50  | 11.31 | 74  | 8.46  |   |
| 10135 | Ren        | -1.34 | 2   | 0.21  | 1   | 0.16  |   |
| 10136 | Rfx2       | -1.34 | 8   | 0.44  | 6   | 0.33  |   |
| 10137 | Rfx4       | -1.34 | 18  | 0.34  | 31  | 0.26  |   |
| 10138 | Rgag1      | -1.34 | 1   | 0.09  | 1   | 0.07  |   |
| 10139 | RGD1304587 | -1.34 | 36  | 10.02 | 36  | 7.49  |   |

Supplemental Table 3  
 FSH + Ad-E versus FSH + Ad-FOXO1(A3), 24 hours

|       | A               | B     | C   | D     | E   | F     | G |
|-------|-----------------|-------|-----|-------|-----|-------|---|
| 10140 | RGD1305537_2    | -1.34 | 0   | 0.21  | 0   | 0.16  |   |
| 10141 | RGD1306186      | -1.34 | 3   | 0.19  | 4   | 0.14  |   |
| 10142 | RGD1311805      | -1.34 | 142 | 19.81 | 148 | 14.81 |   |
| 10143 | RGD1359634      | -1.34 | 4   | 2.22  | 4   | 1.66  |   |
| 10144 | RGD1559951      | -1.34 | 1   | 1.11  | 1   | 0.83  |   |
| 10145 | RGD1560324      | -1.34 | 1   | 0.09  | 1   | 0.07  |   |
| 10146 | RGD1562200      | -1.34 | 13  | 1.29  | 8   | 0.97  |   |
| 10147 | RGD1562469      | -1.34 | 0   | 0.75  | 0   | 0.56  |   |
| 10148 | RGD1564149      | -1.34 | 1   | 0.24  | 1   | 0.18  |   |
| 10149 | RGD1564370      | -1.34 | 0   | 0.9   | 0   | 0.68  |   |
| 10150 | RGD1564552      | -1.34 | 0   | 0.75  | 1   | 0.56  |   |
| 10151 | RGD1564606      | -1.34 | 0   | 1.54  | 0   | 1.15  |   |
| 10152 | RGD1564980      | -1.34 | 1   | 0.77  | 0   | 0.57  |   |
| 10153 | RGD1565512      | -1.34 | 2   | 0.12  | 2   | 0.09  |   |
| 10154 | RGD1566239      | -1.34 | 29  | 9.17  | 23  | 6.86  |   |
| 10155 | RGD1624210      | -1.34 | 6   | 0.47  | 4   | 0.35  |   |
| 10156 | Rmi2            | -1.34 | 1   | 0.8   | 2   | 0.6   |   |
| 10157 | Rn60_10_0698.6  | -1.34 | 0   | 2.3   | 0   | 1.72  |   |
| 10158 | Rn60_14_0474.1  | -1.34 | 0   | 0.17  | 1   | 0.12  |   |
| 10159 | Rn60_15_0083.1  | -1.34 | 0   | 0.47  | 0   | 0.35  |   |
| 10160 | Rn60_15_0538.1  | -1.34 | 1   | 0.43  | 1   | 0.32  |   |
| 10161 | Rn60_20_0032.5  | -1.34 | 38  | 0.97  | 35  | 0.73  |   |
| 10162 | Rn60_20_0041.1  | -1.34 | 0   | 0.65  | 0   | 0.48  |   |
| 10163 | Rn60_20_0055.15 | -1.34 | 0   | 1.45  | 0   | 1.08  |   |
| 10164 | Rn60_2_1764.2   | -1.34 | 2   | 0.33  | 1   | 0.25  |   |
| 10165 | Rn60_7_0716.1   | -1.34 | 0   | 0.2   | 0   | 0.15  |   |
| 10166 | Rn60_X_0713.4   | -1.34 | 1   | 0.61  | 1   | 0.46  |   |
| 10167 | Rn60_X_0752.1   | -1.34 | 0   | 0.9   | 0   | 0.67  |   |
| 10168 | Rnf125          | -1.34 | 1   | 0.26  | 1   | 0.2   |   |
| 10169 | Rnf170          | -1.34 | 42  | 11.85 | 50  | 8.86  |   |
| 10170 | Rnf207          | -1.34 | 1   | 0.15  | 4   | 0.11  |   |
| 10171 | Rnf24           | -1.34 | 6   | 6.96  | 8   | 5.21  |   |
| 10172 | Rnf32           | -1.34 | 11  | 0.46  | 16  | 0.35  |   |
| 10173 | Rom1            | -1.34 | 4   | 0.94  | 4   | 0.7   |   |
| 10174 | Rpl39_5         | -1.34 | 0   | 13.93 | 0   | 10.41 |   |
| 10175 | Rplp2           | -1.34 | 0   | 7.28  | 0   | 5.44  |   |
| 10176 | Rps10_1         | -1.34 | 18  | 40.71 | 21  | 30.44 |   |
| 10177 | Rps27a          | -1.34 | 3   | 32.29 | 3   | 24.14 |   |
| 10178 | Rps6ka1         | -1.34 | 17  | 1.4   | 15  | 1.05  |   |
| 10179 | Rrm2b           | -1.34 | 20  | 1.81  | 23  | 1.35  |   |
| 10180 | Rsad2           | -1.34 | 2   | 0.2   | 3   | 0.15  |   |
| 10181 | Rundc3a         | -1.34 | 9   | 1.06  | 7   | 0.79  |   |
| 10182 | Sac3d1          | -1.34 | 23  | 5.94  | 25  | 4.44  |   |
| 10183 | Sat2            | -1.34 | 19  | 6.47  | 20  | 4.84  |   |
| 10184 | Sbk2            | -1.34 | 2   | 0.15  | 1   | 0.12  |   |
| 10185 | Scd4            | -1.34 | 3   | 0.64  | 2   | 0.48  |   |
| 10186 | Sdk2            | -1.34 | 7   | 0.05  | 13  | 0.04  |   |
| 10187 | Sema4f          | -1.34 | 5   | 0.36  | 5   | 0.27  |   |
| 10188 | Serp2           | -1.34 | 13  | 1.48  | 8   | 1.11  |   |
| 10189 | Sh2d3c          | -1.34 | 4   | 0.33  | 3   | 0.25  |   |
| 10190 | Shisa6          | -1.34 | 12  | 0.46  | 9   | 0.35  |   |
| 10191 | Shkbp1          | -1.34 | 54  | 6.73  | 50  | 5.03  |   |
| 10192 | Sidt1           | -1.34 | 2   | 0.06  | 4   | 0.05  |   |
| 10193 | Sin3b           | -1.34 | 237 | 72.87 | 230 | 54.48 |   |

Supplemental Table 3  
 FSH + Ad-E versus FSH + Ad-FOXO1(A3), 24 hours

|       | A              | B     | C   | D     | E   | F     | G |
|-------|----------------|-------|-----|-------|-----|-------|---|
| 10194 | Sirt4          | -1.34 | 6   | 1.28  | 11  | 0.96  |   |
| 10195 | Siva1          | -1.34 | 36  | 6.35  | 39  | 4.75  |   |
| 10196 | Ska1           | -1.34 | 14  | 1.41  | 14  | 1.05  |   |
| 10197 | Skor2          | -1.34 | 1   | 0.12  | 0   | 0.09  |   |
| 10198 | Slc14a2_1      | -1.34 | 1   | 0.12  | 1   | 0.09  |   |
| 10199 | Slc15a2        | -1.34 | 1   | 0.09  | 1   | 0.07  |   |
| 10200 | Slc16a4        | -1.34 | 48  | 0.18  | 69  | 0.13  |   |
| 10201 | Slc25a26       | -1.34 | 37  | 3.26  | 58  | 2.44  |   |
| 10202 | Slc2a4         | -1.34 | 2   | 0.14  | 1   | 0.11  |   |
| 10203 | Slc39a8        | -1.34 | 10  | 0.89  | 11  | 0.67  |   |
| 10204 | Slc44a5        | -1.34 | 16  | 0.08  | 9   | 0.06  |   |
| 10205 | Slc6a5         | -1.34 | 5   | 0.05  | 2   | 0.04  |   |
| 10206 | Slc9b2         | -1.34 | 2   | 0.18  | 3   | 0.14  |   |
| 10207 | Slco6d1_1      | -1.34 | 1   | 0.15  | 1   | 0.11  |   |
| 10208 | Slitrk3        | -1.34 | 2   | 0.22  | 2   | 0.16  |   |
| 10209 | snopsi28S-3327 | -1.34 | 0   | 5.29  | 0   | 3.95  |   |
| 10210 | SNORA30_2      | -1.34 | 0   | 2.7   | 0   | 2.02  |   |
| 10211 | SNORD113_20    | -1.34 | 1   | 7.62  | 2   | 5.7   |   |
| 10212 | SNORD19        | -1.34 | 0   | 4.7   | 0   | 3.52  |   |
| 10213 | SNORD2         | -1.34 | 0   | 5.25  | 0   | 3.92  |   |
| 10214 | SNORD24_1      | -1.34 | 0   | 14.48 | 0   | 10.83 |   |
| 10215 | SNORD34_1      | -1.34 | 0   | 5.4   | 0   | 4.04  |   |
| 10216 | SNORD83_1      | -1.34 | 0   | 9.66  | 0   | 7.22  |   |
| 10217 | SNORD95_1      | -1.34 | 0   | 10.81 | 0   | 8.08  |   |
| 10218 | Sox7           | -1.34 | 1   | 0.11  | 1   | 0.08  |   |
| 10219 | Sp6            | -1.34 | 2   | 0.36  | 2   | 0.27  |   |
| 10220 | Spatc1         | -1.34 | 7   | 0.23  | 7   | 0.17  |   |
| 10221 | Spdye4_2       | -1.34 | 1   | 0.6   | 0   | 0.45  |   |
| 10222 | Spink13        | -1.34 | 92  | 1.66  | 161 | 1.24  |   |
| 10223 | Spr            | -1.34 | 15  | 9.34  | 22  | 6.98  |   |
| 10224 | Sptlc3         | -1.34 | 6   | 0.12  | 6   | 0.09  |   |
| 10225 | Srpk3          | -1.34 | 3   | 0.18  | 1   | 0.13  |   |
| 10226 | Ss18l2         | -1.34 | 12  | 5.42  | 12  | 4.05  |   |
| 10227 | Sstr2          | -1.34 | 1   | 0.17  | 1   | 0.13  |   |
| 10228 | St6galnac2     | -1.34 | 3   | 0.36  | 3   | 0.27  |   |
| 10229 | St8sia5        | -1.34 | 4   | 0.24  | 3   | 0.18  |   |
| 10230 | Stap1          | -1.34 | 11  | 0.27  | 12  | 0.2   |   |
| 10231 | Stard10        | -1.34 | 16  | 3.64  | 18  | 2.72  |   |
| 10232 | Stk31          | -1.34 | 3   | 0.1   | 3   | 0.08  |   |
| 10233 | Stk32a         | -1.34 | 4   | 0.14  | 3   | 0.11  |   |
| 10234 | Stmn2          | -1.34 | 2   | 0.18  | 2   | 0.13  |   |
| 10235 | Strip2         | -1.34 | 3   | 0.14  | 5   | 0.11  |   |
| 10236 | Stx8           | -1.34 | 90  | 13.78 | 152 | 10.3  |   |
| 10237 | Sult1b1        | -1.34 | 1   | 0.28  | 2   | 0.21  |   |
| 10238 | Sult1d1        | -1.34 | 2   | 0.14  | 5   | 0.1   |   |
| 10239 | Syce1l         | -1.34 | 24  | 5.29  | 25  | 3.96  |   |
| 10240 | Sycp3          | -1.34 | 28  | 0.66  | 29  | 0.49  |   |
| 10241 | Syngn4         | -1.34 | 4   | 0.23  | 2   | 0.17  |   |
| 10242 | Tango2         | -1.34 | 180 | 15    | 208 | 11.22 |   |
| 10243 | Tbx19          | -1.34 | 9   | 0.28  | 13  | 0.21  |   |
| 10244 | Tdrd6          | -1.34 | 1   | 0.05  | 1   | 0.04  |   |
| 10245 | Tecpr2         | -1.34 | 105 | 4.73  | 137 | 3.53  |   |
| 10246 | Tfam           | -1.34 | 86  | 17.39 | 101 | 13    |   |
| 10247 | Tfb2m          | -1.34 | 28  | 7.88  | 33  | 5.89  |   |

Supplemental Table 3  
 FSH + Ad-E versus FSH + Ad-FOXO1(A3), 24 hours

|       | A         | B     | C    | D     | E    | F     | G |
|-------|-----------|-------|------|-------|------|-------|---|
| 10248 | Tgif2-ps1 | -1.34 | 0    | 0.51  | 0    | 0.38  |   |
| 10249 | Tgm1      | -1.34 | 1    | 0.11  | 1    | 0.08  |   |
| 10250 | Tgm5      | -1.34 | 2    | 0.17  | 1    | 0.13  |   |
| 10251 | Thoc5     | -1.34 | 167  | 23.24 | 170  | 17.37 |   |
| 10252 | Tigd4     | -1.34 | 1    | 0.16  | 1    | 0.12  |   |
| 10253 | Timm23b   | -1.34 | 1    | 0.57  | 0    | 0.43  |   |
| 10254 | Tln2      | -1.34 | 65   | 1.88  | 62   | 1.41  |   |
| 10255 | Tm4sf20   | -1.34 | 4    | 0.24  | 7    | 0.18  |   |
| 10256 | Tmc8      | -1.34 | 3    | 0.27  | 5    | 0.2   |   |
| 10257 | Tmem100   | -1.34 | 1    | 0.26  | 1    | 0.19  |   |
| 10258 | Tmem106c  | -1.34 | 53   | 13.2  | 55   | 9.87  |   |
| 10259 | Tmem117   | -1.34 | 19   | 1.14  | 10   | 0.85  |   |
| 10260 | Tmem130   | -1.34 | 5    | 0.39  | 3    | 0.29  |   |
| 10261 | Tmem132b  | -1.34 | 67   | 0.13  | 78   | 0.1   |   |
| 10262 | Tmem132d  | -1.34 | 23   | 0.11  | 21   | 0.08  |   |
| 10263 | Tmem132e  | -1.34 | 3    | 0.08  | 1    | 0.06  |   |
| 10264 | Tmem143   | -1.34 | 51   | 4.55  | 57   | 3.4   |   |
| 10265 | Tmem150b  | -1.34 | 11   | 1.13  | 13   | 0.84  |   |
| 10266 | Tmem156   | -1.34 | 6    | 0.21  | 2    | 0.16  |   |
| 10267 | Tmem240   | -1.34 | 6    | 1.39  | 8    | 1.04  |   |
| 10268 | Tmem256   | -1.34 | 15   | 16.78 | 16   | 12.55 |   |
| 10269 | Tnfaip6   | -1.34 | 22   | 5.05  | 22   | 3.77  |   |
| 10270 | Tnfsf11_1 | -1.34 | 0    | 0.38  | 0    | 0.28  |   |
| 10271 | Tp53tg5   | -1.34 | 2    | 0.35  | 3    | 0.26  |   |
| 10272 | Triap1    | -1.34 | 0    | 1.57  | 0    | 1.17  |   |
| 10273 | Trim14    | -1.34 | 4    | 0.3   | 6    | 0.22  |   |
| 10274 | Trim17    | -1.34 | 26   | 1.48  | 17   | 1.11  |   |
| 10275 | Trim43a   | -1.34 | 2    | 0.53  | 2    | 0.4   |   |
| 10276 | Trim65    | -1.34 | 36   | 3.87  | 37   | 2.9   |   |
| 10277 | Trim72    | -1.34 | 2    | 0.15  | 2    | 0.11  |   |
| 10278 | Ttl9      | -1.34 | 6    | 0.21  | 5    | 0.15  |   |
| 10279 | Tuba3a    | -1.34 | 1    | 0.24  | 1    | 0.18  |   |
| 10280 | Tuba3b    | -1.34 | 2    | 0.46  | 1    | 0.34  |   |
| 10281 | Tusc5     | -1.34 | 1    | 0.11  | 1    | 0.08  |   |
| 10282 | Upp1      | -1.34 | 4    | 0.18  | 1    | 0.13  |   |
| 10283 | UST4r     | -1.34 | 2897 | 0.18  | 2661 | 0.13  |   |
| 10284 | Vstm2l    | -1.34 | 5    | 0.55  | 2    | 0.41  |   |
| 10285 | Vwa7      | -1.34 | 6    | 0.24  | 4    | 0.18  |   |
| 10286 | Wbp2nl    | -1.34 | 2    | 0.17  | 2    | 0.12  |   |
| 10287 | Wdr72     | -1.34 | 3    | 0.11  | 2    | 0.08  |   |
| 10288 | Wnt10a    | -1.34 | 1    | 0.15  | 1    | 0.11  |   |
| 10289 | Wnt5b     | -1.34 | 9    | 0.98  | 11   | 0.74  |   |
| 10290 | Wnt9a     | -1.34 | 8    | 0.59  | 5    | 0.44  |   |
| 10291 | Xylb      | -1.34 | 82   | 5.46  | 86   | 4.08  |   |
| 10292 | Zbtb3     | -1.34 | 17   | 3.04  | 17   | 2.27  |   |
| 10293 | Zbtb37    | -1.34 | 23   | 2.49  | 32   | 1.86  |   |
| 10294 | Zc3h8     | -1.34 | 27   | 3.47  | 30   | 2.59  |   |
| 10295 | Zdhhc18   | -1.34 | 55   | 12.43 | 70   | 9.3   |   |
| 10296 | Zfp110    | -1.34 | 58   | 5.72  | 65   | 4.28  |   |
| 10297 | Zfp14     | -1.34 | 0    | 0.48  | 0    | 0.36  |   |
| 10298 | Zfp260_1  | -1.34 | 0    | 0.22  | 0    | 0.17  |   |
| 10299 | Zfp385b   | -1.34 | 444  | 12.36 | 460  | 9.24  |   |
| 10300 | Zfp511    | -1.34 | 27   | 5.94  | 25   | 4.44  |   |
| 10301 | Zfp593    | -1.34 | 24   | 4.32  | 24   | 3.23  |   |

Supplemental Table 3  
 FSH + Ad-E versus FSH + Ad-FOXO1(A3), 24 hours

|       | A              | B     | C  | D     | E  | F    | G |
|-------|----------------|-------|----|-------|----|------|---|
| 10302 | Zfp711         | -1.34 | 37 | 1.62  | 37 | 1.21 |   |
| 10303 | Zfp951_2       | -1.34 | 0  | 0.59  | 0  | 0.44 |   |
| 10304 | Zmynd19        | -1.34 | 16 | 10.71 | 19 | 8.01 |   |
| 10305 | Zp3            | -1.34 | 4  | 0.82  | 5  | 0.61 |   |
| 10306 | 7SK_174        | -1.34 | 1  | 1.15  | 1  | 0.86 |   |
| 10307 | AABR07005506.1 | -1.34 | 2  | 2.48  | 0  | 1.85 |   |
| 10308 | AABR07009638.1 | -1.34 | 3  | 11.41 | 2  | 8.53 |   |
| 10309 | AABR07021930.1 | -1.34 | 2  | 0.27  | 4  | 0.2  |   |
| 10310 | AABR07030897.1 | -1.34 | 2  | 0.1   | 1  | 0.07 |   |
| 10311 | AABR07032520.3 | -1.34 | 4  | 1.09  | 6  | 0.81 |   |
| 10312 | AABR07032821.1 | -1.34 | 0  | 1.75  | 1  | 1.31 |   |
| 10313 | AABR07034293.1 | -1.34 | 2  | 3.09  | 2  | 2.31 |   |
| 10314 | AABR07036746.1 | -1.34 | 0  | 11.35 | 0  | 8.49 |   |
| 10315 | AABR07043365.1 | -1.34 | 3  | 0.37  | 2  | 0.28 |   |
| 10316 | AABR07043429.1 | -1.34 | 1  | 0.19  | 1  | 0.14 |   |
| 10317 | AABR07050487.1 | -1.34 | 3  | 0.15  | 4  | 0.11 |   |
| 10318 | AABR07054490.1 | -1.34 | 19 | 0.53  | 15 | 0.39 |   |
| 10319 | AABR07056183.1 | -1.34 | 5  | 0.39  | 2  | 0.29 |   |
| 10320 | AABR07070559.1 | -1.34 | 1  | 1.03  | 1  | 0.77 |   |
| 10321 | Abca17         | -1.34 | 4  | 0.07  | 4  | 0.05 |   |
| 10322 | AC098763.1     | -1.34 | 4  | 1.27  | 1  | 0.95 |   |
| 10323 | AC105470.1     | -1.34 | 30 | 3.33  | 29 | 2.49 |   |
| 10324 | AC136795.1     | -1.34 | 0  | 4.34  | 0  | 3.25 |   |
| 10325 | Adamts14       | -1.34 | 2  | 0.07  | 1  | 0.05 |   |
| 10326 | Adat2          | -1.34 | 6  | 0.64  | 5  | 0.48 |   |
| 10327 | Adgrb2         | -1.34 | 18 | 1     | 15 | 0.75 |   |
| 10328 | Ap1g2          | -1.34 | 26 | 3.26  | 30 | 2.43 |   |
| 10329 | Arhgap27       | -1.34 | 3  | 0.14  | 1  | 0.1  |   |
| 10330 | Ascl2          | -1.34 | 1  | 0.23  | 1  | 0.17 |   |
| 10331 | Bag5           | -1.34 | 0  | 0.43  | 0  | 0.32 |   |
| 10332 | Bin2           | -1.34 | 2  | 0.19  | 1  | 0.14 |   |
| 10333 | Btbd6          | -1.34 | 10 | 2.04  | 6  | 1.53 |   |
| 10334 | Btn2a2         | -1.34 | 12 | 1.29  | 13 | 0.97 |   |
| 10335 | Camk2b         | -1.34 | 15 | 0.26  | 7  | 0.19 |   |
| 10336 | Catip          | -1.34 | 1  | 0.13  | 2  | 0.1  |   |
| 10337 | Ccdc157        | -1.34 | 35 | 2.21  | 42 | 1.65 |   |
| 10338 | Cd226          | -1.34 | 1  | 0.07  | 3  | 0.05 |   |
| 10339 | Cdk18          | -1.34 | 11 | 0.7   | 11 | 0.52 |   |
| 10340 | Cgref1         | -1.34 | 5  | 0.82  | 3  | 0.61 |   |
| 10341 | Chrm2          | -1.34 | 1  | 0.17  | 1  | 0.12 |   |
| 10342 | Clcn1          | -1.34 | 3  | 0.11  | 4  | 0.08 |   |
| 10343 | Clec11a        | -1.34 | 4  | 0.48  | 4  | 0.36 |   |
| 10344 | Cmtm8          | -1.34 | 10 | 0.63  | 20 | 0.47 |   |
| 10345 | Cnm1           | -1.34 | 8  | 0.52  | 18 | 0.39 |   |
| 10346 | Coro2b         | -1.34 | 17 | 2.17  | 16 | 1.62 |   |
| 10347 | Crispld1       | -1.34 | 6  | 0.49  | 7  | 0.37 |   |
| 10348 | Cyp2d4         | -1.34 | 1  | 0.21  | 2  | 0.15 |   |
| 10349 | Dhrs711        | -1.34 | 25 | 0.13  | 40 | 0.1  |   |
| 10350 | Dhrs9          | -1.34 | 1  | 0.09  | 2  | 0.07 |   |
| 10351 | Dhx58          | -1.34 | 5  | 0.55  | 6  | 0.41 |   |
| 10352 | Dkk1           | -1.34 | 1  | 0.32  | 1  | 0.24 |   |
| 10353 | Dnajc6         | -1.34 | 7  | 0.21  | 8  | 0.16 |   |
| 10354 | Dok7           | -1.34 | 4  | 0.3   | 6  | 0.22 |   |
| 10355 | Duox1          | -1.34 | 3  | 0.14  | 2  | 0.1  |   |



Supplemental Table 3  
 FSH + Ad-E versus FSH + Ad-FOXO1(A3), 24 hours

|       | A               | B     | C  | D     | E   | F    | G |
|-------|-----------------|-------|----|-------|-----|------|---|
| 10356 | Dusp23          | -1.34 | 7  | 2.94  | 8   | 2.2  |   |
| 10357 | ENSRNOG00000050 | -1.34 | 20 | 4.13  | 24  | 3.08 |   |
| 10358 | ENSRNOG00000050 | -1.34 | 3  | 0.46  | 3   | 0.34 |   |
| 10359 | Fam136a         | -1.34 | 75 | 16.45 | 78  | 12.3 |   |
| 10360 | Fbln2           | -1.34 | 4  | 0.25  | 3   | 0.19 |   |
| 10361 | Fbln7           | -1.34 | 4  | 0.55  | 3   | 0.41 |   |
| 10362 | Flt1            | -1.34 | 10 | 0.05  | 24  | 0.04 |   |
| 10363 | Fscn1           | -1.34 | 12 | 1.96  | 9   | 1.46 |   |
| 10364 | Fut1            | -1.34 | 1  | 0.13  | 1   | 0.1  |   |
| 10365 | Fxyd5           | -1.34 | 2  | 0.72  | 3   | 0.54 |   |
| 10366 | Gli2            | -1.34 | 20 | 0.46  | 22  | 0.34 |   |
| 10367 | Gtse1           | -1.34 | 58 | 6.84  | 66  | 5.12 |   |
| 10368 | Heyl            | -1.34 | 2  | 0.08  | 2   | 0.06 |   |
| 10369 | Hist1h2ah       | -1.34 | 2  | 1.84  | 2   | 1.38 |   |
| 10370 | Hist2h2aa2_1    | -1.34 | 0  | 0.92  | 0   | 0.69 |   |
| 10371 | Hoxd4           | -1.34 | 2  | 0.13  | 5   | 0.1  |   |
| 10372 | Hs3st3b1        | -1.34 | 5  | 0.38  | 7   | 0.29 |   |
| 10373 | Il17rb          | -1.34 | 2  | 0.12  | 4   | 0.09 |   |
| 10374 | Il33            | -1.34 | 1  | 0.15  | 1   | 0.11 |   |
| 10375 | Inpp4b          | -1.34 | 10 | 0.08  | 12  | 0.06 |   |
| 10376 | Itga7           | -1.34 | 5  | 0.29  | 4   | 0.21 |   |
| 10377 | Kcnk15          | -1.34 | 5  | 0.61  | 4   | 0.45 |   |
| 10378 | Kctd13          | -1.34 | 37 | 5.54  | 38  | 4.14 |   |
| 10379 | Klf17           | -1.34 | 1  | 0.18  | 2   | 0.14 |   |
| 10380 | Klhl10          | -1.34 | 6  | 0.36  | 11  | 0.27 |   |
| 10381 | Lactb2          | -1.34 | 24 | 6.33  | 24  | 4.73 |   |
| 10382 | Lbp             | -1.34 | 1  | 0.15  | 1   | 0.11 |   |
| 10383 | Lgals9          | -1.34 | 5  | 0.47  | 1   | 0.35 |   |
| 10384 | LOC100362980    | -1.34 | 0  | 0.32  | 0   | 0.24 |   |
| 10385 | LOC100366054    | -1.34 | 2  | 0.29  | 0   | 0.22 |   |
| 10386 | LOC100909752    | -1.34 | 2  | 0.21  | 1   | 0.16 |   |
| 10387 | LOC100910689    | -1.34 | 1  | 0.87  | 1   | 0.65 |   |
| 10388 | LOC102548225    | -1.34 | 5  | 0.64  | 5   | 0.48 |   |
| 10389 | LOC681367       | -1.34 | 4  | 4.2   | 4   | 3.14 |   |
| 10390 | LOC688390       | -1.34 | 1  | 0.19  | 1   | 0.14 |   |
| 10391 | Lpxn            | -1.34 | 4  | 0.63  | 4   | 0.47 |   |
| 10392 | Lrp1b_2         | -1.34 | 4  | 0.64  | 4   | 0.48 |   |
| 10393 | Lurap1          | -1.34 | 6  | 1.54  | 9   | 1.15 |   |
| 10394 | Ly75            | -1.34 | 2  | 0.07  | 6   | 0.05 |   |
| 10395 | Mapk11          | -1.34 | 3  | 0.15  | 1   | 0.11 |   |
| 10396 | Mat1a           | -1.34 | 2  | 0.22  | 2   | 0.16 |   |
| 10397 | Megf6           | -1.34 | 3  | 0.08  | 11  | 0.06 |   |
| 10398 | Mipol1          | -1.34 | 77 | 3.24  | 122 | 2.43 |   |
| 10399 | Mllt11          | -1.34 | 49 | 7.96  | 60  | 5.95 |   |
| 10400 | Mzt1            | -1.34 | 16 | 4.58  | 17  | 3.43 |   |
| 10401 | Naip6           | -1.34 | 2  | 0.06  | 3   | 0.04 |   |
| 10402 | Npff            | -1.34 | 6  | 2.46  | 6   | 1.84 |   |
| 10403 | Nr1i3           | -1.34 | 21 | 2.17  | 41  | 1.62 |   |
| 10404 | Ntm             | -1.34 | 4  | 0.11  | 4   | 0.08 |   |
| 10405 | Ntrk3           | -1.34 | 11 | 0.12  | 8   | 0.09 |   |
| 10406 | Oip5            | -1.34 | 8  | 1.06  | 9   | 0.79 |   |
| 10407 | Oscar           | -1.34 | 1  | 0.18  | 2   | 0.13 |   |
| 10408 | Otogl           | -1.34 | 6  | 0.06  | 5   | 0.04 |   |
| 10409 | Pcdhb3          | -1.34 | 16 | 2.41  | 16  | 1.8  |   |

Supplemental Table 3  
 FSH + Ad-E versus FSH + Ad-FOXO1(A3), 24 hours

|       | A              | B     | C   | D      | E   | F     | G |
|-------|----------------|-------|-----|--------|-----|-------|---|
| 10410 | Pcgf6          | -1.34 | 75  | 8.49   | 90  | 6.35  |   |
| 10411 | Pde6c          | -1.34 | 4   | 0.14   | 3   | 0.1   |   |
| 10412 | Pfn2           | -1.34 | 23  | 11.71  | 23  | 8.76  |   |
| 10413 | Ppard          | -1.34 | 49  | 2.25   | 52  | 1.69  |   |
| 10414 | Ppfia3         | -1.34 | 4   | 0.15   | 3   | 0.11  |   |
| 10415 | Ppfibp2        | -1.34 | 15  | 0.55   | 11  | 0.41  |   |
| 10416 | Ppp4r4         | -1.34 | 5   | 0.1    | 4   | 0.08  |   |
| 10417 | Primpol        | -1.34 | 13  | 1.66   | 21  | 1.24  |   |
| 10418 | Prr5           | -1.34 | 5   | 0.19   | 5   | 0.14  |   |
| 10419 | Ptpn22         | -1.34 | 2   | 0.13   | 2   | 0.1   |   |
| 10420 | Rac2           | -1.34 | 2   | 0.27   | 2   | 0.2   |   |
| 10421 | Rer1           | -1.34 | 174 | 45.29  | 172 | 33.86 |   |
| 10422 | RGD1563072_1   | -1.34 | 0   | 0.53   | 0   | 0.4   |   |
| 10423 | RGD1563145     | -1.34 | 0   | 0.57   | 0   | 0.43  |   |
| 10424 | Rgs14          | -1.34 | 2   | 0.12   | 1   | 0.09  |   |
| 10425 | Rgs17          | -1.34 | 7   | 0.15   | 12  | 0.11  |   |
| 10426 | Rgs8           | -1.34 | 1   | 0.07   | 1   | 0.05  |   |
| 10427 | Rn60_18_0532.1 | -1.34 | 0   | 0.72   | 0   | 0.54  |   |
| 10428 | Rn60_1_0913.2  | -1.34 | 0   | 1.01   | 0   | 0.75  |   |
| 10429 | Rn60_20_0292.1 | -1.34 | 0   | 1.77   | 0   | 1.32  |   |
| 10430 | Rn60_X_0594.3  | -1.34 | 0   | 1.72   | 0   | 1.28  |   |
| 10431 | Rps2_1         | -1.34 | 0   | 0.32   | 1   | 0.24  |   |
| 10432 | RT1-M6-1       | -1.34 | 16  | 0.45   | 30  | 0.34  |   |
| 10433 | Sept12         | -1.34 | 2   | 0.27   | 1   | 0.2   |   |
| 10434 | Sgk494         | -1.34 | 17  | 1.5    | 16  | 1.12  |   |
| 10435 | Shank1         | -1.34 | 3   | 0.1    | 4   | 0.07  |   |
| 10436 | Shisa8         | -1.34 | 4   | 0.57   | 4   | 0.43  |   |
| 10437 | Siglec1        | -1.34 | 1   | 0.05   | 1   | 0.04  |   |
| 10438 | Slc16a7        | -1.34 | 18  | 1.33   | 40  | 0.99  |   |
| 10439 | Slc35e4        | -1.34 | 62  | 5.67   | 84  | 4.24  |   |
| 10440 | Slc35f2        | -1.34 | 3   | 0.13   | 2   | 0.1   |   |
| 10441 | Snap91         | -1.34 | 7   | 0.43   | 6   | 0.32  |   |
| 10442 | Snx20          | -1.34 | 3   | 0.26   | 1   | 0.2   |   |
| 10443 | Sppl3          | -1.34 | 537 | 53.73  | 599 | 40.17 |   |
| 10444 | Susd1          | -1.34 | 44  | 2.15   | 39  | 1.61  |   |
| 10445 | Svop           | -1.34 | 2   | 0.14   | 3   | 0.1   |   |
| 10446 | Syt4           | -1.34 | 1   | 0.09   | 1   | 0.07  |   |
| 10447 | Tex19.1        | -1.34 | 3   | 0.63   | 3   | 0.47  |   |
| 10448 | Tgfbr1_2       | -1.34 | 0   | 0.28   | 0   | 0.21  |   |
| 10449 | Tmprss11d      | -1.34 | 26  | 0.22   | 48  | 0.16  |   |
| 10450 | Tnnt2          | -1.34 | 1   | 0.3    | 2   | 0.22  |   |
| 10451 | Ttc32          | -1.34 | 7   | 1.48   | 3   | 1.11  |   |
| 10452 | Unc93a         | -1.34 | 1   | 0.26   | 1   | 0.2   |   |
| 10453 | Vcam1          | -1.34 | 1   | 0.09   | 2   | 0.07  |   |
| 10454 | Wfdc11         | -1.34 | 1   | 0.3    | 1   | 0.22  |   |
| 10455 | Zfp949         | -1.34 | 25  | 2.12   | 29  | 1.59  |   |
| 10456 | Zmynd10        | -1.34 | 5   | 1.05   | 6   | 0.78  |   |
| 10457 | Zwilch         | -1.34 | 46  | 6.06   | 44  | 4.53  |   |
| 10458 | Nacc1          | -1.34 | 582 | 48.61  | 600 | 36.28 |   |
| 10459 | Ppp2r1a        | -1.34 | 649 | 104.75 | 656 | 78.07 |   |
| 10460 | Map3k5         | -1.34 | 471 | 21.7   | 510 | 16.16 |   |
| 10461 | Slc4a3         | -1.34 | 223 | 14.93  | 228 | 11.1  |   |
| 10462 | Xpo5           | -1.35 | 397 | 26.38  | 404 | 19.61 |   |
| 10463 | Cs             | -1.35 | 514 | 114.57 | 537 | 85.11 |   |

Supplemental Table 3  
 FSH + Ad-E versus FSH + Ad-FOXO1(A3), 24 hours

|       | A          | B     | C    | D      | E    | F      | G |
|-------|------------|-------|------|--------|------|--------|---|
| 10464 | Tbc1d2b    | -1.35 | 183  | 9.52   | 199  | 7.07   |   |
| 10465 | Lrrc41     | -1.35 | 637  | 71.85  | 650  | 53.35  |   |
| 10466 | Sall2      | -1.35 | 138  | 8.88   | 139  | 6.59   |   |
| 10467 | Tenm4      | -1.35 | 1056 | 34.08  | 1090 | 25.29  |   |
| 10468 | Rae1       | -1.35 | 149  | 29.72  | 151  | 22.04  |   |
| 10469 | Cers2      | -1.35 | 387  | 50.71  | 377  | 37.61  |   |
| 10470 | Ccdc97     | -1.35 | 129  | 15.1   | 128  | 11.19  |   |
| 10471 | Sfswap     | -1.35 | 287  | 12.35  | 345  | 9.16   |   |
| 10472 | Rgl2       | -1.35 | 130  | 14.52  | 127  | 10.76  |   |
| 10473 | Cdkn2aipnl | -1.35 | 237  | 46.35  | 243  | 34.35  |   |
| 10474 | Slc25a39   | -1.35 | 218  | 55.38  | 217  | 41.03  |   |
| 10475 | Cyb5a      | -1.35 | 111  | 52.14  | 125  | 38.62  |   |
| 10476 | Ncoa3      | -1.35 | 136  | 8.17   | 152  | 6.05   |   |
| 10477 | Col16a1    | -1.35 | 346  | 21.35  | 343  | 15.8   |   |
| 10478 | Adipor1    | -1.35 | 447  | 73.67  | 454  | 54.54  |   |
| 10479 | Eif4a3     | -1.35 | 325  | 73.62  | 316  | 54.5   |   |
| 10480 | Clec2d2    | -1.35 | 78   | 9.22   | 86   | 6.82   |   |
| 10481 | Acacb      | -1.35 | 115  | 3.84   | 125  | 2.84   |   |
| 10482 | Slc36a4    | -1.35 | 104  | 11.72  | 102  | 8.67   |   |
| 10483 | Deaf1      | -1.35 | 166  | 15.88  | 192  | 11.75  |   |
| 10484 | Prps2      | -1.35 | 930  | 110.63 | 948  | 81.8   |   |
| 10485 | Zfp516     | -1.35 | 265  | 15.08  | 243  | 11.15  |   |
| 10486 | Pld1       | -1.35 | 464  | 23.48  | 473  | 17.36  |   |
| 10487 | Ptges      | -1.35 | 271  | 74.2   | 305  | 54.83  |   |
| 10488 | F8         | -1.35 | 111  | 3.69   | 100  | 2.73   |   |
| 10489 | Pomgnt1    | -1.35 | 343  | 44.46  | 343  | 32.84  |   |
| 10490 | Zbed3      | -1.35 | 87   | 16.6   | 87   | 12.26  |   |
| 10491 | Acsl4      | -1.35 | 992  | 60.11  | 976  | 44.4   |   |
| 10492 | Plk2       | -1.35 | 85   | 10.67  | 85   | 7.88   |   |
| 10493 | Stom       | -1.35 | 83   | 11.67  | 83   | 8.61   |   |
| 10494 | Sema6a     | -1.35 | 101  | 9.1    | 94   | 6.72   |   |
| 10495 | Dalrd3     | -1.35 | 162  | 16.48  | 123  | 12.16  |   |
| 10496 | Gnas_2     | -1.36 | 864  | 102.48 | 753  | 75.62  |   |
| 10497 | Ndufa4     | -1.36 | 81   | 35.05  | 93   | 25.86  |   |
| 10498 | Parp8      | -1.36 | 126  | 11.26  | 143  | 8.3    |   |
| 10499 | Dcaf13     | -1.36 | 97   | 18.14  | 117  | 13.38  |   |
| 10500 | Mrpl45     | -1.36 | 79   | 12.32  | 77   | 9.08   |   |
| 10501 | Tsnax      | -1.36 | 264  | 33.74  | 265  | 24.89  |   |
| 10502 | Dnajc16    | -1.36 | 84   | 9.8    | 81   | 7.23   |   |
| 10503 | Phf1       | -1.36 | 76   | 10.78  | 79   | 7.94   |   |
| 10504 | Six5       | -1.36 | 70   | 11.72  | 69   | 8.64   |   |
| 10505 | Fbxl20     | -1.36 | 129  | 15.07  | 148  | 11.1   |   |
| 10506 | Sardh      | -1.36 | 99   | 5.9    | 119  | 4.34   |   |
| 10507 | Vnn1       | -1.36 | 291  | 39.27  | 294  | 28.92  |   |
| 10508 | Rpl7a_1    | -1.36 | 0    | 29.95  | 0    | 22.05  |   |
| 10509 | Kat5       | -1.36 | 157  | 25.45  | 154  | 18.73  |   |
| 10510 | Fam96a     | -1.36 | 75   | 20.01  | 70   | 14.73  |   |
| 10511 | Ring1      | -1.36 | 72   | 13.74  | 69   | 10.11  |   |
| 10512 | Ndn        | -1.36 | 187  | 42.85  | 185  | 31.53  |   |
| 10513 | Ube3b      | -1.36 | 353  | 33.07  | 354  | 24.33  |   |
| 10514 | Cops6      | -1.36 | 130  | 38.58  | 128  | 28.38  |   |
| 10515 | Zfp513     | -1.36 | 128  | 20.86  | 125  | 15.34  |   |
| 10516 | Rpl32_1    | -1.36 | 33   | 250.3  | 29   | 184.13 |   |
| 10517 | Fbxo21     | -1.36 | 130  | 35.82  | 114  | 26.34  |   |

Supplemental Table 3  
 FSH + Ad-E versus FSH + Ad-FOXO1(A3), 24 hours

|       | A              | B     | C    | D      | E    | F      | G |
|-------|----------------|-------|------|--------|------|--------|---|
| 10518 | Psma7          | -1.36 | 263  | 94.64  | 277  | 69.58  |   |
| 10519 | Pkm_2          | -1.36 | 172  | 123.95 | 152  | 91.1   |   |
| 10520 | Arfrp1         | -1.36 | 66   | 22.42  | 67   | 16.47  |   |
| 10521 | Fpgt           | -1.36 | 66   | 4.43   | 99   | 3.26   |   |
| 10522 | Adipor2        | -1.36 | 183  | 44.1   | 180  | 32.41  |   |
| 10523 | Opa3           | -1.36 | 101  | 9.95   | 97   | 7.31   |   |
| 10524 | Eci1           | -1.36 | 327  | 100.2  | 337  | 73.58  |   |
| 10525 | Tubb5          | -1.36 | 3077 | 519.09 | 3028 | 381.18 |   |
| 10526 | E2f6           | -1.36 | 158  | 17.83  | 172  | 13.09  |   |
| 10527 | Plekhj1        | -1.36 | 48   | 23.7   | 42   | 17.39  |   |
| 10528 | Kdm8           | -1.36 | 66   | 7.85   | 75   | 5.76   |   |
| 10529 | Adgrl1         | -1.36 | 422  | 23.51  | 448  | 17.24  |   |
| 10530 | Sorbs3         | -1.36 | 244  | 29.42  | 273  | 21.58  |   |
| 10531 | P2rx4          | -1.36 | 118  | 18.93  | 116  | 13.88  |   |
| 10532 | Ctdsp1         | -1.36 | 460  | 49.77  | 452  | 36.48  |   |
| 10533 | Cln6           | -1.36 | 63   | 8.37   | 74   | 6.14   |   |
| 10534 | Psma1          | -1.36 | 214  | 62.3   | 216  | 45.65  |   |
| 10535 | Psemb2         | -1.37 | 215  | 81.1   | 234  | 59.41  |   |
| 10536 | Apex1          | -1.37 | 151  | 42.03  | 148  | 30.78  |   |
| 10537 | Reep3          | -1.37 | 404  | 25.61  | 394  | 18.75  |   |
| 10538 | Arvcf          | -1.37 | 54   | 4.72   | 51   | 3.46   |   |
| 10539 | Arid1b         | -1.37 | 645  | 21.76  | 720  | 15.93  |   |
| 10540 | Slc6a6         | -1.37 | 129  | 12.89  | 128  | 9.44   |   |
| 10541 | Ddah2          | -1.37 | 215  | 61.62  | 189  | 45.12  |   |
| 10542 | Gale           | -1.37 | 51   | 12.43  | 55   | 9.1    |   |
| 10543 | Elac2          | -1.37 | 158  | 17.49  | 158  | 12.8   |   |
| 10544 | Tmed10         | -1.37 | 528  | 142.74 | 521  | 104.4  |   |
| 10545 | Hdhd2          | -1.37 | 146  | 6.78   | 133  | 4.96   |   |
| 10546 | Slc25a15       | -1.37 | 46   | 4.35   | 48   | 3.18   |   |
| 10547 | Sema4c         | -1.37 | 195  | 15.08  | 197  | 11.02  |   |
| 10548 | Clec16a        | -1.37 | 159  | 10.23  | 199  | 7.47   |   |
| 10549 | Aifm2          | -1.37 | 106  | 9.33   | 108  | 6.81   |   |
| 10550 | Ino80c         | -1.37 | 53   | 6.16   | 54   | 4.5    |   |
| 10551 | Ndufa6         | -1.37 | 108  | 61.63  | 105  | 45.03  |   |
| 10552 | Rbl1           | -1.37 | 62   | 5.31   | 67   | 3.88   |   |
| 10553 | RGD1306215     | -1.37 | 25   | 15.5   | 17   | 11.32  |   |
| 10554 | U2af114        | -1.37 | 49   | 13.28  | 47   | 9.7    |   |
| 10555 | Zmynd8         | -1.37 | 377  | 16.61  | 375  | 12.13  |   |
| 10556 | Asf1a          | -1.37 | 24   | 5.59   | 21   | 4.08   |   |
| 10557 | Hmbs           | -1.37 | 50   | 9.27   | 50   | 6.77   |   |
| 10558 | Pias2          | -1.37 | 363  | 41.63  | 358  | 30.4   |   |
| 10559 | Tmem128        | -1.37 | 167  | 42.4   | 165  | 30.96  |   |
| 10560 | RGD1311783     | -1.37 | 96   | 14.35  | 90   | 10.48  |   |
| 10561 | Tmem216        | -1.37 | 44   | 11.61  | 49   | 8.47   |   |
| 10562 | Ephb4          | -1.37 | 759  | 67.31  | 772  | 49.12  |   |
| 10563 | Bcar3          | -1.37 | 581  | 40.58  | 593  | 29.61  |   |
| 10564 | Slc39a3        | -1.37 | 95   | 8.11   | 86   | 5.92   |   |
| 10565 | Zdhhc13        | -1.37 | 49   | 6.16   | 55   | 4.49   |   |
| 10566 | Dcaf4          | -1.37 | 68   | 7.34   | 58   | 5.35   |   |
| 10567 | Snrpa          | -1.37 | 90   | 25.93  | 86   | 18.91  |   |
| 10568 | Ppp2r4         | -1.37 | 563  | 77.7   | 581  | 56.66  |   |
| 10569 | Mdm1           | -1.37 | 57   | 4.05   | 53   | 2.95   |   |
| 10570 | AABR07027388.1 | -1.37 | 3    | 19.39  | 1    | 14.13  |   |
| 10571 | Ubac1          | -1.37 | 55   | 8.03   | 54   | 5.86   |   |

Supplemental Table 3  
 FSH + Ad-E versus FSH + Ad-FOXO1(A3), 24 hours

|       | A            | B     | C    | D       | E    | F      | G |
|-------|--------------|-------|------|---------|------|--------|---|
| 10572 | Pxdn         | -1.37 | 492  | 37.7    | 490  | 27.47  |   |
| 10573 | Mfsd3        | -1.37 | 14   | 6.48    | 11   | 4.72   |   |
| 10574 | Zfp280c      | -1.37 | 51   | 4.18    | 65   | 3.04   |   |
| 10575 | St3gal3      | -1.37 | 119  | 11.7    | 154  | 8.52   |   |
| 10576 | Ap2a2        | -1.37 | 644  | 68.91   | 650  | 50.19  |   |
| 10577 | 5_8S_rRNA_30 | -1.37 | 0    | 1363.08 | 0    | 992.54 |   |
| 10578 | Fam171a2     | -1.37 | 85   | 11.15   | 91   | 8.11   |   |
| 10579 | Igtp         | -1.37 | 68   | 3.23    | 59   | 2.35   |   |
| 10580 | Tm4sf1       | -1.37 | 40   | 7.06    | 41   | 5.14   |   |
| 10581 | Fam57a       | -1.37 | 93   | 25.69   | 93   | 18.69  |   |
| 10582 | Rai1         | -1.37 | 382  | 12.49   | 418  | 9.09   |   |
| 10583 | Rbm45        | -1.37 | 107  | 14.88   | 124  | 10.82  |   |
| 10584 | Dus1l        | -1.37 | 57   | 5.68    | 58   | 4.13   |   |
| 10585 | Dph2         | -1.37 | 37   | 6.22    | 38   | 4.52   |   |
| 10586 | Gja1         | -1.38 | 9096 | 1040.24 | 8916 | 756.5  |   |
| 10587 | Litaf        | -1.38 | 91   | 11.81   | 90   | 8.59   |   |
| 10588 | Usp49        | -1.38 | 164  | 7.36    | 172  | 5.35   |   |
| 10589 | Mpzl1        | -1.38 | 151  | 17.15   | 168  | 12.47  |   |
| 10590 | Fam53b       | -1.38 | 115  | 4.36    | 114  | 3.17   |   |
| 10591 | Mtmr1        | -1.38 | 171  | 14.84   | 171  | 10.78  |   |
| 10592 | Pcnxl4       | -1.38 | 107  | 7.41    | 119  | 5.39   |   |
| 10593 | Acvr1        | -1.38 | 136  | 12.66   | 152  | 9.2    |   |
| 10594 | Elp2         | -1.38 | 269  | 27.97   | 305  | 20.33  |   |
| 10595 | Bak1         | -1.38 | 156  | 27.23   | 152  | 19.79  |   |
| 10596 | Capn10       | -1.38 | 129  | 16.75   | 127  | 12.16  |   |
| 10597 | Tmem14c      | -1.38 | 67   | 21.72   | 77   | 15.77  |   |
| 10598 | LOC690422    | -1.38 | 40   | 2.24    | 42   | 1.63   |   |
| 10599 | Zmiz1        | -1.38 | 1158 | 45.4    | 1194 | 32.97  |   |
| 10600 | Tmem67       | -1.38 | 97   | 6.17    | 98   | 4.48   |   |
| 10601 | Mea1         | -1.38 | 243  | 77.36   | 234  | 56.15  |   |
| 10602 | Col6a3       | -1.38 | 34   | 1.12    | 37   | 0.81   |   |
| 10603 | Wipf3        | -1.38 | 89   | 5.51    | 86   | 4      |   |
| 10604 | Lrrc8d       | -1.38 | 346  | 39.11   | 340  | 28.38  |   |
| 10605 | Hspa5        | -1.38 | 2384 | 337.05  | 2316 | 244.49 |   |
| 10606 | MGC94207     | -1.38 | 47   | 13.93   | 42   | 10.1   |   |
| 10607 | Dexi         | -1.38 | 178  | 17.38   | 193  | 12.6   |   |
| 10608 | Emd          | -1.38 | 107  | 24.53   | 100  | 17.79  |   |
| 10609 | Slc35e1      | -1.38 | 109  | 29.44   | 109  | 21.35  |   |
| 10610 | Cx3cl1       | -1.38 | 34   | 3.82    | 35   | 2.77   |   |
| 10611 | Plxna1       | -1.38 | 734  | 29.21   | 707  | 21.16  |   |
| 10612 | Parp11       | -1.38 | 83   | 8.91    | 105  | 6.46   |   |
| 10613 | Lhfpl2       | -1.38 | 186  | 13.83   | 186  | 10.02  |   |
| 10614 | Crat         | -1.38 | 103  | 15.86   | 111  | 11.49  |   |
| 10615 | Med16        | -1.38 | 71   | 15.11   | 57   | 10.95  |   |
| 10616 | Daglb        | -1.38 | 43   | 5.54    | 46   | 4.01   |   |
| 10617 | Lrrn2        | -1.38 | 42   | 3.53    | 50   | 2.56   |   |
| 10618 | Ttc7a        | -1.38 | 48   | 2.59    | 52   | 1.87   |   |
| 10619 | Mapkapk3     | -1.38 | 239  | 30.57   | 245  | 22.14  |   |
| 10620 | Plekhm2      | -1.38 | 251  | 19.13   | 268  | 13.85  |   |
| 10621 | Sdf4         | -1.38 | 469  | 101.17  | 488  | 73.25  |   |
| 10622 | Prpf40b      | -1.38 | 125  | 10.98   | 135  | 7.95   |   |
| 10623 | Pqlc3        | -1.38 | 141  | 23.99   | 155  | 17.36  |   |
| 10624 | Omd          | -1.38 | 1    | 11.97   | 1    | 8.66   |   |
| 10625 | Setd4        | -1.38 | 126  | 13.43   | 168  | 9.72   |   |

Supplemental Table 3  
 FSH + Ad-E versus FSH + Ad-FOXO1(A3), 24 hours

|       | A              | B     | C    | D      | E    | F      | G |
|-------|----------------|-------|------|--------|------|--------|---|
| 10626 | Ostc           | -1.38 | 155  | 42.7   | 190  | 30.9   |   |
| 10627 | Cks1b          | -1.38 | 94   | 20.98  | 89   | 15.18  |   |
| 10628 | Relb           | -1.38 | 45   | 5.76   | 56   | 4.16   |   |
| 10629 | Ypel3          | -1.38 | 38   | 11.9   | 43   | 8.61   |   |
| 10630 | Tmem150a       | -1.38 | 161  | 38.45  | 160  | 27.82  |   |
| 10631 | Abhd2          | -1.38 | 107  | 16.47  | 128  | 11.91  |   |
| 10632 | Nomo1          | -1.38 | 2240 | 189.01 | 2185 | 136.67 |   |
| 10633 | Dip2a          | -1.38 | 289  | 17.54  | 286  | 12.68  |   |
| 10634 | RGD1308134     | -1.38 | 54   | 21     | 46   | 15.18  |   |
| 10635 | Fdx1l          | -1.38 | 40   | 14.09  | 39   | 10.18  |   |
| 10636 | Cyp1b1         | -1.38 | 30   | 1.98   | 29   | 1.43   |   |
| 10637 | Efhd2          | -1.38 | 125  | 20.62  | 128  | 14.9   |   |
| 10638 | Kctd7          | -1.38 | 33   | 7.35   | 33   | 5.31   |   |
| 10639 | Lmbr1          | -1.38 | 42   | 4.34   | 56   | 3.14   |   |
| 10640 | RGD1307262     | -1.38 | 39   | 14.68  | 39   | 10.61  |   |
| 10641 | Stx2           | -1.38 | 83   | 8.3    | 99   | 6      |   |
| 10642 | Mfap2          | -1.38 | 123  | 41.32  | 122  | 29.84  |   |
| 10643 | Rpl31          | -1.38 | 43   | 102.23 | 43   | 73.82  |   |
| 10644 | Per1           | -1.38 | 89   | 7.87   | 87   | 5.68   |   |
| 10645 | Greb1l         | -1.39 | 526  | 28.99  | 506  | 20.93  |   |
| 10646 | Srrt           | -1.39 | 203  | 43.1   | 198  | 31.12  |   |
| 10647 | Acp2           | -1.39 | 216  | 36.03  | 208  | 26.01  |   |
| 10648 | Adi1           | -1.39 | 29   | 7.48   | 31   | 5.4    |   |
| 10649 | Pard6g         | -1.39 | 86   | 7.43   | 105  | 5.36   |   |
| 10650 | Lamtor2        | -1.39 | 66   | 36.59  | 66   | 26.41  |   |
| 10651 | Peo1           | -1.39 | 60   | 5.83   | 58   | 4.21   |   |
| 10652 | Rrnad1         | -1.39 | 61   | 5.16   | 62   | 3.73   |   |
| 10653 | Pip5k1c        | -1.39 | 157  | 11.98  | 167  | 8.64   |   |
| 10654 | Agpat6         | -1.39 | 266  | 26.33  | 268  | 19     |   |
| 10655 | Tceal1         | -1.39 | 55   | 17.59  | 57   | 12.69  |   |
| 10656 | Tle3           | -1.39 | 122  | 8.66   | 130  | 6.24   |   |
| 10657 | Snrpc          | -1.39 | 29   | 19.25  | 35   | 13.89  |   |
| 10658 | Mcm2           | -1.39 | 260  | 28.42  | 260  | 20.5   |   |
| 10659 | Stub1          | -1.39 | 117  | 47.38  | 113  | 34.18  |   |
| 10660 | Csrnp3         | -1.39 | 334  | 12.14  | 299  | 8.76   |   |
| 10661 | AABR07058466.1 | -1.39 | 10   | 2.99   | 7    | 2.16   |   |
| 10662 | RGD1559909     | -1.39 | 29   | 14.5   | 28   | 10.46  |   |
| 10663 | Psph           | -1.39 | 34   | 8.24   | 37   | 5.94   |   |
| 10664 | Tbc1d24        | -1.39 | 75   | 5.36   | 60   | 3.86   |   |
| 10665 | Ccng1          | -1.39 | 474  | 52.87  | 456  | 38.11  |   |
| 10666 | Gpn1           | -1.39 | 134  | 14.79  | 167  | 10.66  |   |
| 10667 | Rnaset2        | -1.39 | 84   | 33.3   | 87   | 23.99  |   |
| 10668 | Trim24         | -1.39 | 250  | 15.23  | 304  | 10.97  |   |
| 10669 | Lrrc58         | -1.39 | 157  | 35.5   | 153  | 25.56  |   |
| 10670 | Pcyt2          | -1.39 | 169  | 26.01  | 155  | 18.73  |   |
| 10671 | Tmem205        | -1.39 | 29   | 6.77   | 40   | 4.88   |   |
| 10672 | Wdr13          | -1.39 | 68   | 12.92  | 85   | 9.3    |   |
| 10673 | Chaf1b         | -1.39 | 36   | 4.81   | 31   | 3.46   |   |
| 10674 | Slc6a9         | -1.39 | 37   | 2.97   | 28   | 2.14   |   |
| 10675 | Ext2           | -1.39 | 773  | 90.14  | 770  | 64.85  |   |
| 10676 | Atpaf2         | -1.39 | 89   | 13.13  | 83   | 9.44   |   |
| 10677 | Rnf167         | -1.39 | 143  | 25.71  | 146  | 18.49  |   |
| 10678 | Camk1          | -1.39 | 95   | 12.84  | 89   | 9.24   |   |
| 10679 | Hspa14         | -1.39 | 105  | 16.29  | 120  | 11.72  |   |

Supplemental Table 3  
 FSH + Ad-E versus FSH + Ad-FOXO1(A3), 24 hours

|       | A          | B     | C    | D      | E    | F      | G |
|-------|------------|-------|------|--------|------|--------|---|
| 10680 | Drap1      | -1.39 | 85   | 20.09  | 85   | 14.44  |   |
| 10681 | RGD1565033 | -1.39 | 26   | 4.57   | 25   | 3.29   |   |
| 10682 | Yipf2      | -1.39 | 60   | 14.69  | 55   | 10.56  |   |
| 10683 | Nup88      | -1.39 | 372  | 50.14  | 388  | 36.02  |   |
| 10684 | Dnttp1     | -1.39 | 172  | 22.3   | 165  | 16.02  |   |
| 10685 | Kbtbd4     | -1.39 | 63   | 8.24   | 61   | 5.92   |   |
| 10686 | Gsdmd      | -1.39 | 153  | 28.24  | 151  | 20.28  |   |
| 10687 | Stx5       | -1.39 | 241  | 36.04  | 261  | 25.88  |   |
| 10688 | Fem1a      | -1.39 | 151  | 24.91  | 144  | 17.88  |   |
| 10689 | Gdf1       | -1.39 | 41   | 3.41   | 40   | 2.45   |   |
| 10690 | Hint2      | -1.39 | 61   | 30.89  | 70   | 22.17  |   |
| 10691 | Xrcc5      | -1.39 | 43   | 3.53   | 43   | 2.53   |   |
| 10692 | Ecd        | -1.39 | 85   | 12.43  | 90   | 8.91   |   |
| 10693 | AC128212.1 | -1.39 | 36   | 17.92  | 27   | 12.85  |   |
| 10694 | Psm2       | -1.39 | 962  | 117.13 | 934  | 83.98  |   |
| 10695 | Use1       | -1.39 | 86   | 25.61  | 76   | 18.36  |   |
| 10696 | Pkm_1      | -1.39 | 410  | 300.31 | 374  | 215.29 |   |
| 10697 | Nacc2      | -1.4  | 271  | 16.26  | 264  | 11.65  |   |
| 10698 | Sec23ip    | -1.4  | 331  | 24.4   | 331  | 17.48  |   |
| 10699 | Tmem70     | -1.4  | 29   | 4.92   | 29   | 3.53   |   |
| 10700 | Mrps36_1   | -1.4  | 46   | 6.46   | 46   | 4.63   |   |
| 10701 | Zcchc3     | -1.4  | 24   | 7.22   | 23   | 5.18   |   |
| 10702 | Tacc1      | -1.4  | 430  | 16.9   | 416  | 12.11  |   |
| 10703 | Pdk2       | -1.4  | 49   | 13.9   | 48   | 9.95   |   |
| 10704 | Tmem11     | -1.4  | 50   | 11.47  | 58   | 8.21   |   |
| 10705 | Camk2g     | -1.4  | 213  | 9.74   | 220  | 6.97   |   |
| 10706 | Agtrap     | -1.4  | 116  | 12.24  | 118  | 8.76   |   |
| 10707 | B4galt1    | -1.4  | 1462 | 184.59 | 1527 | 132.1  |   |
| 10708 | Ptges2     | -1.4  | 72   | 11.72  | 71   | 8.38   |   |
| 10709 | Rap1gap2   | -1.4  | 148  | 5.55   | 123  | 3.97   |   |
| 10710 | Sspl2b     | -1.4  | 177  | 20.94  | 178  | 14.98  |   |
| 10711 | Zfp496     | -1.4  | 221  | 20.64  | 217  | 14.77  |   |
| 10712 | Cacna1h    | -1.4  | 249  | 10.67  | 244  | 7.63   |   |
| 10713 | Mrps12     | -1.4  | 26   | 11.58  | 31   | 8.28   |   |
| 10714 | Mzf1       | -1.4  | 34   | 2.31   | 33   | 1.65   |   |
| 10715 | Tnfrsf1a   | -1.4  | 188  | 31.19  | 183  | 22.3   |   |
| 10716 | Wwp2       | -1.4  | 96   | 10.03  | 98   | 7.17   |   |
| 10717 | Vkorc11i_2 | -1.4  | 1    | 8.08   | 0    | 5.78   |   |
| 10718 | Ap4m1      | -1.4  | 60   | 11.96  | 64   | 8.55   |   |
| 10719 | Tmem252    | -1.4  | 48   | 7.84   | 45   | 5.6    |   |
| 10720 | Vps28      | -1.4  | 153  | 50.03  | 145  | 35.74  |   |
| 10721 | Tbl3       | -1.4  | 114  | 15.78  | 109  | 11.27  |   |
| 10722 | Orc2       | -1.4  | 119  | 8.07   | 127  | 5.76   |   |
| 10723 | Fkbp4      | -1.4  | 486  | 62.36  | 475  | 44.53  |   |
| 10724 | Tmed9      | -1.4  | 336  | 86.03  | 322  | 61.41  |   |
| 10725 | Creb3l2    | -1.4  | 492  | 46.78  | 519  | 33.39  |   |
| 10726 | Map2k2     | -1.4  | 313  | 56.86  | 303  | 40.58  |   |
| 10727 | Cep72      | -1.4  | 34   | 3.68   | 35   | 2.62   |   |
| 10728 | Ehd1       | -1.4  | 177  | 19.72  | 172  | 14.07  |   |
| 10729 | Foxm1      | -1.4  | 74   | 6.99   | 68   | 4.98   |   |
| 10730 | Mrps25     | -1.4  | 37   | 10.81  | 34   | 7.71   |   |
| 10731 | Pex11b     | -1.4  | 51   | 11.33  | 66   | 8.09   |   |
| 10732 | Smim1      | -1.4  | 41   | 17.58  | 39   | 12.55  |   |
| 10733 | N4bp3_2    | -1.4  | 1    | 4.3    | 2    | 3.07   |   |

Supplemental Table 3  
 FSH + Ad-E versus FSH + Ad-FOXO1(A3), 24 hours

|       | A              | B     | C    | D      | E    | F      | G |
|-------|----------------|-------|------|--------|------|--------|---|
| 10734 | Nek8           | -1.4  | 30   | 3.04   | 39   | 2.17   |   |
| 10735 | Pcdhgb8        | -1.4  | 22   | 3.29   | 21   | 2.35   |   |
| 10736 | RGD1562618     | -1.4  | 218  | 8.64   | 233  | 6.16   |   |
| 10737 | Zdhhc8         | -1.4  | 163  | 16.45  | 160  | 11.73  |   |
| 10738 | Tmem208        | -1.4  | 50   | 19.51  | 50   | 13.91  |   |
| 10739 | Map7           | -1.4  | 140  | 5.63   | 135  | 4.01   |   |
| 10740 | Ln timer       | -1.4  | 133  | 6.85   | 125  | 4.88   |   |
| 10741 | Fam63a         | -1.4  | 176  | 30.19  | 164  | 21.5   |   |
| 10742 | Ppm1g          | -1.4  | 230  | 35.37  | 223  | 25.19  |   |
| 10743 | AABR07064061.1 | -1.4  | 26   | 10.6   | 32   | 7.55   |   |
| 10744 | Fam217b        | -1.4  | 22   | 1.65   | 21   | 1.17   |   |
| 10745 | Mfsd7b         | -1.4  | 40   | 4.29   | 43   | 3.06   |   |
| 10746 | Tpgs1          | -1.4  | 28   | 4.93   | 34   | 3.51   |   |
| 10747 | Zmym6          | -1.4  | 102  | 4.95   | 103  | 3.53   |   |
| 10748 | Mpv17l2        | -1.4  | 21   | 4.49   | 20   | 3.2    |   |
| 10749 | Soat1          | -1.4  | 413  | 66.03  | 394  | 47.01  |   |
| 10750 | Usp30          | -1.41 | 122  | 10.46  | 125  | 7.44   |   |
| 10751 | Rgs19          | -1.41 | 76   | 17.4   | 76   | 12.38  |   |
| 10752 | Slc6a8         | -1.41 | 264  | 22.93  | 249  | 16.31  |   |
| 10753 | Cdt1           | -1.41 | 65   | 10.03  | 60   | 7.13   |   |
| 10754 | Me1            | -1.41 | 1973 | 189.28 | 1918 | 134.64 |   |
| 10755 | Mfsd11         | -1.41 | 127  | 12.68  | 124  | 9.01   |   |
| 10756 | Bend5          | -1.41 | 32   | 3.95   | 38   | 2.8    |   |
| 10757 | Ccdc53         | -1.41 | 84   | 21.03  | 108  | 14.94  |   |
| 10758 | Csnk1g2        | -1.41 | 322  | 42.67  | 331  | 30.3   |   |
| 10759 | Gylt1b         | -1.41 | 21   | 3.02   | 22   | 2.15   |   |
| 10760 | LOC100910438   | -1.41 | 0    | 3.96   | 0    | 2.81   |   |
| 10761 | Nudt10         | -1.41 | 102  | 22.52  | 94   | 15.99  |   |
| 10762 | Rgs3           | -1.41 | 26   | 1.3    | 32   | 0.92   |   |
| 10763 | Sec61a2        | -1.41 | 182  | 12.04  | 206  | 8.55   |   |
| 10764 | Slc35b1        | -1.41 | 202  | 43.22  | 195  | 30.7   |   |
| 10765 | Spc24          | -1.41 | 27   | 8.37   | 26   | 5.95   |   |
| 10766 | Akap17b        | -1.41 | 60   | 2.8    | 63   | 1.99   |   |
| 10767 | Rft1           | -1.41 | 69   | 10.1   | 85   | 7.17   |   |
| 10768 | Fasn           | -1.41 | 1375 | 54.55  | 1317 | 38.74  |   |
| 10769 | Cdk4           | -1.41 | 381  | 150.07 | 363  | 106.56 |   |
| 10770 | Nfyb           | -1.41 | 82   | 8.39   | 88   | 5.96   |   |
| 10771 | Tmem50a        | -1.41 | 182  | 54.82  | 175  | 38.89  |   |
| 10772 | Glt8d1         | -1.41 | 126  | 20.69  | 131  | 14.68  |   |
| 10773 | Galm           | -1.41 | 92   | 12.2   | 110  | 8.66   |   |
| 10774 | LOC100912380   | -1.41 | 0    | 77.48  | 0    | 54.96  |   |
| 10775 | Wdr91          | -1.41 | 63   | 5.47   | 56   | 3.88   |   |
| 10776 | Alad           | -1.41 | 142  | 25.59  | 130  | 18.12  |   |
| 10777 | Lpar2          | -1.41 | 19   | 3.35   | 18   | 2.37   |   |
| 10778 | Nfkbie         | -1.41 | 19   | 4.29   | 22   | 3.04   |   |
| 10779 | Nudt2          | -1.41 | 27   | 7.6    | 23   | 5.38   |   |
| 10780 | Ppp1r12c       | -1.41 | 279  | 28.37  | 260  | 20.09  |   |
| 10781 | Srd5a1         | -1.41 | 49   | 5.06   | 43   | 3.58   |   |
| 10782 | Tbc1d8         | -1.41 | 48   | 1.38   | 59   | 0.98   |   |
| 10783 | Tmed1          | -1.41 | 193  | 51.72  | 183  | 36.63  |   |
| 10784 | Myo1b          | -1.41 | 633  | 35.92  | 630  | 25.43  |   |
| 10785 | Cog8           | -1.41 | 108  | 15.84  | 104  | 11.22  |   |
| 10786 | Scn4b          | -1.41 | 60   | 4.75   | 53   | 3.36   |   |
| 10787 | Fbxo7          | -1.41 | 154  | 24.39  | 155  | 17.25  |   |



Supplemental Table 3  
 FSH + Ad-E versus FSH + Ad-FOXO1(A3), 24 hours

|       | A          | B     | C    | D      | E    | F      | G |
|-------|------------|-------|------|--------|------|--------|---|
| 10788 | Prpsap2    | -1.41 | 225  | 32.93  | 230  | 23.29  |   |
| 10789 | Ndufaf3    | -1.41 | 38   | 8.13   | 38   | 5.75   |   |
| 10790 | Il17rc     | -1.41 | 51   | 5.72   | 59   | 4.05   |   |
| 10791 | Tmem222    | -1.41 | 81   | 13.97  | 81   | 9.88   |   |
| 10792 | Mybl2      | -1.41 | 68   | 5.37   | 76   | 3.79   |   |
| 10793 | Pak4       | -1.41 | 121  | 14.47  | 117  | 10.23  |   |
| 10794 | Tm9sf4     | -1.41 | 261  | 31.47  | 270  | 22.25  |   |
| 10795 | Thra       | -1.41 | 210  | 21.65  | 215  | 15.3   |   |
| 10796 | Dnajc11    | -1.42 | 225  | 30.47  | 225  | 21.53  |   |
| 10797 | Lzic       | -1.42 | 100  | 11.67  | 108  | 8.25   |   |
| 10798 | Abhd17a    | -1.42 | 167  | 36.31  | 170  | 25.65  |   |
| 10799 | Galnt7     | -1.42 | 414  | 23.8   | 423  | 16.8   |   |
| 10800 | Rad51      | -1.42 | 19   | 3.01   | 17   | 2.12   |   |
| 10801 | Slc35a5    | -1.42 | 94   | 12.54  | 89   | 8.85   |   |
| 10802 | Tmc6       | -1.42 | 28   | 2.77   | 30   | 1.95   |   |
| 10803 | Tmem45al   | -1.42 | 6    | 4.13   | 5    | 2.91   |   |
| 10804 | Bace1      | -1.42 | 238  | 20.49  | 270  | 14.47  |   |
| 10805 | Dennd3     | -1.42 | 24   | 1.14   | 23   | 0.8    |   |
| 10806 | Nprl3      | -1.42 | 204  | 16.93  | 244  | 11.96  |   |
| 10807 | Porcn      | -1.42 | 19   | 3.48   | 21   | 2.46   |   |
| 10808 | Pus7l      | -1.42 | 26   | 2.35   | 22   | 1.66   |   |
| 10809 | Rnf4       | -1.42 | 122  | 34.78  | 142  | 24.56  |   |
| 10810 | Stra13     | -1.42 | 19   | 32.42  | 19   | 22.89  |   |
| 10811 | Ptov1      | -1.42 | 1055 | 210.68 | 1021 | 148.71 |   |
| 10812 | Vps52      | -1.42 | 301  | 30.64  | 282  | 21.62  |   |
| 10813 | Rpl18      | -1.42 | 427  | 263.43 | 417  | 185.91 |   |
| 10814 | Tex15      | -1.42 | 326  | 10.88  | 294  | 7.67   |   |
| 10815 | Pdrg1      | -1.42 | 57   | 16.1   | 54   | 11.35  |   |
| 10816 | Sh3glb2    | -1.42 | 64   | 10.56  | 58   | 7.44   |   |
| 10817 | Zfp94_1    | -1.42 | 224  | 20.12  | 210  | 14.19  |   |
| 10818 | Tkt        | -1.42 | 704  | 110.52 | 670  | 77.94  |   |
| 10819 | Ndufa10    | -1.42 | 216  | 35.22  | 255  | 24.83  |   |
| 10820 | Erc8       | -1.42 | 48   | 5.03   | 49   | 3.54   |   |
| 10821 | Ino80e     | -1.42 | 114  | 18.61  | 113  | 13.12  |   |
| 10822 | Nip7       | -1.42 | 40   | 10.76  | 36   | 7.58   |   |
| 10823 | Hsp90ab1   | -1.42 | 4161 | 620.59 | 3835 | 437.32 |   |
| 10824 | Mettl7a    | -1.42 | 65   | 10.6   | 61   | 7.46   |   |
| 10825 | Aimp2      | -1.42 | 76   | 14.79  | 101  | 10.42  |   |
| 10826 | Wdr59      | -1.42 | 88   | 4.11   | 95   | 2.9    |   |
| 10827 | Tmem201    | -1.42 | 140  | 8.21   | 137  | 5.78   |   |
| 10828 | Cad        | -1.42 | 267  | 13.94  | 253  | 9.81   |   |
| 10829 | AC136013.2 | -1.42 | 28   | 7.73   | 32   | 5.44   |   |
| 10830 | Dnajc15    | -1.42 | 66   | 12.14  | 52   | 8.54   |   |
| 10831 | Irak2      | -1.42 | 33   | 2.09   | 26   | 1.47   |   |
| 10832 | Lmln       | -1.42 | 49   | 2.81   | 59   | 1.98   |   |
| 10833 | LOC501110  | -1.42 | 41   | 3.06   | 42   | 2.15   |   |
| 10834 | Nceh1      | -1.42 | 136  | 13.04  | 137  | 9.18   |   |
| 10835 | Spsb4      | -1.42 | 121  | 11.09  | 133  | 7.81   |   |
| 10836 | AC117925.5 | -1.42 | 2    | 4.97   | 3    | 3.5    |   |
| 10837 | Armc6      | -1.42 | 24   | 3.27   | 28   | 2.3    |   |
| 10838 | Bard1      | -1.42 | 27   | 1.77   | 41   | 1.25   |   |
| 10839 | Echs1      | -1.42 | 0    | 8.22   | 0    | 5.79   |   |
| 10840 | Peli1      | -1.42 | 38   | 5.17   | 44   | 3.63   |   |
| 10841 | Gatad2a    | -1.42 | 477  | 29.79  | 465  | 20.95  |   |

Supplemental Table 3  
 FSH + Ad-E versus FSH + Ad-FOXO1(A3), 24 hours

|       | A              | B     | C   | D      | E   | F     | G |
|-------|----------------|-------|-----|--------|-----|-------|---|
| 10842 | Slc39a14       | -1.42 | 101 | 6.36   | 115 | 4.47  |   |
| 10843 | Txn2           | -1.42 | 189 | 53.28  | 187 | 37.44 |   |
| 10844 | Smarcd1        | -1.42 | 355 | 38.58  | 346 | 27.1  |   |
| 10845 | Fhl3           | -1.42 | 36  | 7.14   | 37  | 5.02  |   |
| 10846 | Gas2l3         | -1.42 | 36  | 1.83   | 32  | 1.29  |   |
| 10847 | Npm3           | -1.42 | 43  | 22.89  | 34  | 16.08 |   |
| 10848 | Paox           | -1.42 | 55  | 7.49   | 58  | 5.26  |   |
| 10849 | Tbc1d10a       | -1.42 | 76  | 11.69  | 79  | 8.2   |   |
| 10850 | Fam214b        | -1.42 | 56  | 7.78   | 54  | 5.46  |   |
| 10851 | Agbl5          | -1.43 | 115 | 7.17   | 147 | 5.03  |   |
| 10852 | Banf1          | -1.43 | 108 | 53.62  | 100 | 37.61 |   |
| 10853 | Eif3d          | -1.43 | 417 | 76.66  | 398 | 53.74 |   |
| 10854 | Hcfc1r1        | -1.43 | 16  | 19.7   | 20  | 13.81 |   |
| 10855 | Bcdin3d        | -1.43 | 39  | 4.72   | 52  | 3.31  |   |
| 10856 | Gpaa1          | -1.43 | 169 | 28.69  | 150 | 20.11 |   |
| 10857 | Ift57          | -1.43 | 45  | 4.55   | 42  | 3.19  |   |
| 10858 | Spred3         | -1.43 | 21  | 2.47   | 30  | 1.73  |   |
| 10859 | Zmat5          | -1.43 | 17  | 6.1    | 17  | 4.28  |   |
| 10860 | Slc38a1        | -1.43 | 41  | 5.08   | 66  | 3.56  |   |
| 10861 | Ttyh1          | -1.43 | 22  | 1.88   | 20  | 1.32  |   |
| 10862 | Rpl15          | -1.43 | 678 | 179    | 639 | 125.4 |   |
| 10863 | Camta2         | -1.43 | 168 | 11.58  | 169 | 8.11  |   |
| 10864 | Tfip11         | -1.43 | 147 | 14.59  | 153 | 10.21 |   |
| 10865 | Ppt1           | -1.43 | 134 | 30.88  | 141 | 21.6  |   |
| 10866 | Cmtr2          | -1.43 | 31  | 4.38   | 30  | 3.06  |   |
| 10867 | Kctd15         | -1.43 | 32  | 4.22   | 30  | 2.95  |   |
| 10868 | Spice1         | -1.43 | 47  | 3.27   | 42  | 2.29  |   |
| 10869 | Spata2L        | -1.43 | 36  | 3.71   | 33  | 2.59  |   |
| 10870 | Gtpbp1         | -1.43 | 160 | 19.01  | 152 | 13.29 |   |
| 10871 | Mrpl37         | -1.43 | 175 | 23.22  | 157 | 16.24 |   |
| 10872 | Tbca_1         | -1.43 | 201 | 137.21 | 186 | 95.93 |   |
| 10873 | Ppox           | -1.43 | 84  | 15.42  | 80  | 10.78 |   |
| 10874 | Pgp            | -1.43 | 93  | 13.08  | 85  | 9.14  |   |
| 10875 | Pop4           | -1.43 | 56  | 14.14  | 53  | 9.88  |   |
| 10876 | Ncoa4          | -1.43 | 755 | 76.96  | 705 | 53.78 |   |
| 10877 | Glb1           | -1.43 | 498 | 51.01  | 526 | 35.65 |   |
| 10878 | Gpc1           | -1.43 | 368 | 38.04  | 354 | 26.58 |   |
| 10879 | Mlh1           | -1.43 | 107 | 8.11   | 98  | 5.67  |   |
| 10880 | C1qbp          | -1.43 | 140 | 45.68  | 131 | 31.9  |   |
| 10881 | Atp5e          | -1.43 | 107 | 102.34 | 102 | 71.46 |   |
| 10882 | Laptm4b        | -1.43 | 634 | 112.64 | 613 | 78.64 |   |
| 10883 | Dusp19         | -1.43 | 16  | 5.52   | 18  | 3.85  |   |
| 10884 | Ly6g6e         | -1.43 | 37  | 21.01  | 33  | 14.66 |   |
| 10885 | Tcirg1         | -1.43 | 31  | 3.87   | 38  | 2.7   |   |
| 10886 | Ttll1          | -1.43 | 26  | 2.84   | 36  | 1.98  |   |
| 10887 | AABR07054189.1 | -1.43 | 4   | 9.95   | 3   | 6.94  |   |
| 10888 | Hspa8          | -1.43 | 0   | 2.59   | 0   | 1.81  |   |
| 10889 | Katnb1         | -1.43 | 52  | 6.59   | 47  | 4.6   |   |
| 10890 | LOC100359539   | -1.43 | 101 | 17.17  | 82  | 11.98 |   |
| 10891 | Psme1          | -1.43 | 154 | 81.47  | 117 | 56.85 |   |
| 10892 | Tmem14a        | -1.43 | 13  | 5.02   | 14  | 3.5   |   |
| 10893 | XAF1           | -1.43 | 34  | 6.63   | 47  | 4.63  |   |
| 10894 | Lepr           | -1.43 | 59  | 1.26   | 71  | 0.88  |   |
| 10895 | Tor3a          | -1.43 | 13  | 3      | 11  | 2.09  |   |

Supplemental Table 3  
 FSH + Ad-E versus FSH + Ad-FOXO1(A3), 24 hours

|       | A              | B     | C   | D      | E   | F      | G |
|-------|----------------|-------|-----|--------|-----|--------|---|
| 10896 | Gpr108         | -1.43 | 147 | 25.31  | 135 | 17.65  |   |
| 10897 | Crtc1          | -1.44 | 161 | 16.83  | 183 | 11.73  |   |
| 10898 | Fam129b        | -1.44 | 50  | 4.33   | 44  | 3.02   |   |
| 10899 | Tmem185b       | -1.44 | 44  | 15.13  | 41  | 10.54  |   |
| 10900 | Tcf3           | -1.44 | 323 | 34.85  | 337 | 24.28  |   |
| 10901 | Tfrc           | -1.44 | 416 | 30.94  | 394 | 21.54  |   |
| 10902 | Dtl            | -1.44 | 37  | 3.27   | 32  | 2.28   |   |
| 10903 | Rars2          | -1.44 | 42  | 5.35   | 56  | 3.73   |   |
| 10904 | AABR07063425.3 | -1.44 | 21  | 23.03  | 11  | 16.03  |   |
| 10905 | Aste1          | -1.44 | 48  | 2.92   | 48  | 2.03   |   |
| 10906 | Nrip1          | -1.44 | 590 | 22.57  | 568 | 15.71  |   |
| 10907 | Sh3pxd2a       | -1.44 | 54  | 2.85   | 46  | 1.99   |   |
| 10908 | Inpp1          | -1.44 | 686 | 71.38  | 633 | 49.67  |   |
| 10909 | Dynlt1         | -1.44 | 107 | 50.16  | 106 | 34.9   |   |
| 10910 | Gstp1          | -1.44 | 609 | 284.38 | 566 | 197.83 |   |
| 10911 | Psmf1          | -1.44 | 135 | 30.09  | 131 | 20.93  |   |
| 10912 | Abca5          | -1.44 | 52  | 2.91   | 50  | 2.03   |   |
| 10913 | Nop9           | -1.44 | 59  | 9.25   | 66  | 6.43   |   |
| 10914 | Vamp2          | -1.44 | 241 | 37.92  | 228 | 26.36  |   |
| 10915 | Ppp1ca         | -1.44 | 606 | 145.22 | 567 | 100.94 |   |
| 10916 | Trim25         | -1.44 | 300 | 36.01  | 295 | 25.03  |   |
| 10917 | Dhdds          | -1.44 | 173 | 13.15  | 189 | 9.14   |   |
| 10918 | Igfbp4         | -1.44 | 646 | 106.32 | 609 | 73.89  |   |
| 10919 | Parp3          | -1.44 | 70  | 12.29  | 68  | 8.54   |   |
| 10920 | Jkamp          | -1.44 | 109 | 24.64  | 108 | 17.12  |   |
| 10921 | Atp5d          | -1.44 | 154 | 22.59  | 146 | 15.68  |   |
| 10922 | Lgals3bp       | -1.44 | 165 | 25.37  | 146 | 17.61  |   |
| 10923 | Lrrc75a        | -1.44 | 58  | 19.57  | 62  | 13.59  |   |
| 10924 | Rrp8           | -1.44 | 30  | 3.74   | 26  | 2.6    |   |
| 10925 | AABR07021996.1 | -1.44 | 14  | 1.4    | 14  | 0.97   |   |
| 10926 | Aars2          | -1.44 | 61  | 5.29   | 57  | 3.67   |   |
| 10927 | Cish           | -1.44 | 17  | 1.6    | 16  | 1.11   |   |
| 10928 | Dxo            | -1.44 | 35  | 7.44   | 31  | 5.16   |   |
| 10929 | Uck2           | -1.44 | 35  | 6.21   | 43  | 4.31   |   |
| 10930 | Usp11          | -1.44 | 377 | 37.47  | 344 | 25.97  |   |
| 10931 | Lmf1           | -1.44 | 156 | 16.11  | 153 | 11.16  |   |
| 10932 | LOC102550456   | -1.44 | 12  | 13.52  | 9   | 9.37   |   |
| 10933 | Pxylp1         | -1.44 | 98  | 10.5   | 95  | 7.27   |   |
| 10934 | Tinagl1        | -1.44 | 42  | 5.99   | 39  | 4.15   |   |
| 10935 | Tmem184c       | -1.44 | 651 | 87.36  | 609 | 60.53  |   |
| 10936 | Rhog           | -1.44 | 119 | 16.62  | 114 | 11.51  |   |
| 10937 | Ctdspl         | -1.44 | 113 | 8.68   | 108 | 6.01   |   |
| 10938 | Mtch1          | -1.44 | 885 | 161.33 | 891 | 111.65 |   |
| 10939 | LOC102723236_1 | -1.45 | 0   | 80.86  | 1   | 55.94  |   |
| 10940 | Urm1           | -1.45 | 82  | 19.48  | 85  | 13.48  |   |
| 10941 | Mcoln1         | -1.45 | 162 | 23.44  | 178 | 16.22  |   |
| 10942 | Ddx26b         | -1.45 | 104 | 5.45   | 96  | 3.77   |   |
| 10943 | Tbccd1         | -1.45 | 48  | 5.62   | 45  | 3.89   |   |
| 10944 | Thbs3          | -1.45 | 86  | 9.19   | 86  | 6.35   |   |
| 10945 | Rhot2          | -1.45 | 152 | 18.56  | 141 | 12.83  |   |
| 10946 | Ccdc120        | -1.45 | 63  | 4.95   | 65  | 3.42   |   |
| 10947 | Sarm1          | -1.45 | 57  | 4.75   | 57  | 3.28   |   |
| 10948 | Grik5          | -1.45 | 194 | 11.47  | 208 | 7.93   |   |
| 10949 | Tns4           | -1.45 | 167 | 14.32  | 150 | 9.9    |   |

Supplemental Table 3  
 FSH + Ad-E versus FSH + Ad-FOXO1(A3), 24 hours

|       | A            | B     | C   | D      | E   | F     | G |
|-------|--------------|-------|-----|--------|-----|-------|---|
| 10950 | Arl6ip5      | -1.45 | 253 | 61.22  | 259 | 42.28 |   |
| 10951 | LOC100910710 | -1.45 | 56  | 20.53  | 55  | 14.17 |   |
| 10952 | Pla2g4a      | -1.45 | 19  | 1.39   | 25  | 0.96  |   |
| 10953 | Btbd19       | -1.45 | 18  | 1.55   | 14  | 1.07  |   |
| 10954 | Det1         | -1.45 | 48  | 6.24   | 46  | 4.31  |   |
| 10955 | Ovca2        | -1.45 | 8   | 1.6    | 7   | 1.11  |   |
| 10956 | Plk3         | -1.45 | 15  | 1.97   | 13  | 1.36  |   |
| 10957 | Podxl        | -1.45 | 18  | 0.82   | 14  | 0.57  |   |
| 10958 | Rbpms2       | -1.45 | 19  | 2.11   | 17  | 1.45  |   |
| 10959 | Rhbg         | -1.45 | 18  | 1.87   | 14  | 1.29  |   |
| 10960 | Rnf220       | -1.45 | 266 | 39.76  | 264 | 27.44 |   |
| 10961 | Sh3bp1       | -1.45 | 14  | 1.83   | 14  | 1.26  |   |
| 10962 | Tmem192      | -1.45 | 45  | 6.23   | 45  | 4.3   |   |
| 10963 | Zfp772       | -1.45 | 12  | 2.28   | 13  | 1.58  |   |
| 10964 | Gstm5        | -1.45 | 26  | 9.83   | 26  | 6.78  |   |
| 10965 | Snrpf        | -1.45 | 14  | 5.54   | 14  | 3.83  |   |
| 10966 | Clk2         | -1.45 | 304 | 18.28  | 287 | 12.61 |   |
| 10967 | Ndufs3       | -1.45 | 154 | 43.9   | 149 | 30.27 |   |
| 10968 | Tmem176b     | -1.45 | 517 | 108.21 | 486 | 74.63 |   |
| 10969 | Ndufa11      | -1.45 | 105 | 64.63  | 99  | 44.57 |   |
| 10970 | Ppapdc1b     | -1.45 | 111 | 18.81  | 101 | 12.97 |   |
| 10971 | Prr14        | -1.45 | 42  | 13.98  | 41  | 9.63  |   |
| 10972 | Racgap1      | -1.45 | 55  | 6.28   | 50  | 4.32  |   |
| 10973 | RGD1309534   | -1.45 | 60  | 7.42   | 63  | 5.11  |   |
| 10974 | Sgsh         | -1.45 | 52  | 20.05  | 48  | 13.81 |   |
| 10975 | Ubiad1       | -1.45 | 98  | 9.28   | 92  | 6.39  |   |
| 10976 | Tm9sf1       | -1.45 | 188 | 22.88  | 171 | 15.76 |   |
| 10977 | Wfs1         | -1.45 | 64  | 6.39   | 64  | 4.4   |   |
| 10978 | Pcdhgc3      | -1.45 | 334 | 19.72  | 340 | 13.57 |   |
| 10979 | Asmtl        | -1.45 | 29  | 8.42   | 27  | 5.79  |   |
| 10980 | Aip          | -1.45 | 121 | 18.96  | 112 | 13.03 |   |
| 10981 | Aspscr1      | -1.45 | 122 | 15.61  | 123 | 10.73 |   |
| 10982 | Sgta         | -1.45 | 218 | 25.7   | 206 | 17.67 |   |
| 10983 | Snx21        | -1.46 | 67  | 6.45   | 76  | 4.43  |   |
| 10984 | Gtf2h2       | -1.46 | 50  | 8.78   | 57  | 6.04  |   |
| 10985 | Nrep         | -1.46 | 53  | 30.8   | 48  | 21.16 |   |
| 10986 | Wdr77        | -1.46 | 0   | 4.57   | 0   | 3.14  |   |
| 10987 | Armt1        | -1.46 | 48  | 5.5    | 43  | 3.78  |   |
| 10988 | Cxxc5_1      | -1.46 | 287 | 62.16  | 247 | 42.71 |   |
| 10989 | lvd          | -1.46 | 171 | 25.02  | 160 | 17.19 |   |
| 10990 | LOC100360635 | -1.46 | 15  | 64.41  | 21  | 44.25 |   |
| 10991 | Selo         | -1.46 | 182 | 21.78  | 170 | 14.97 |   |
| 10992 | Bin3         | -1.46 | 89  | 11.47  | 121 | 7.87  |   |
| 10993 | Klhl12       | -1.46 | 67  | 5.46   | 81  | 3.75  |   |
| 10994 | Thop1        | -1.46 | 50  | 7.13   | 47  | 4.89  |   |
| 10995 | Ophn1        | -1.46 | 184 | 8.93   | 182 | 6.13  |   |
| 10996 | Uqcrq        | -1.46 | 63  | 14.78  | 58  | 10.15 |   |
| 10997 | Pcdh18       | -1.46 | 67  | 4.27   | 56  | 2.93  |   |
| 10998 | Tmem135      | -1.46 | 186 | 12.74  | 176 | 8.74  |   |
| 10999 | LOC100363012 | -1.46 | 53  | 89.73  | 36  | 61.56 |   |
| 11000 | Ccdc115      | -1.46 | 85  | 16.43  | 85  | 11.27 |   |
| 11001 | Mgat4b       | -1.46 | 825 | 118.83 | 768 | 81.49 |   |
| 11002 | Ppp6r1       | -1.46 | 535 | 36.77  | 507 | 25.21 |   |
| 11003 | Psmg4        | -1.46 | 73  | 22.63  | 78  | 15.51 |   |

Supplemental Table 3  
 FSH + Ad-E versus FSH + Ad-FOXO1(A3), 24 hours

|       | A              | B     | C    | D      | E    | F      | G |
|-------|----------------|-------|------|--------|------|--------|---|
| 11004 | Uros           | -1.46 | 18   | 2.76   | 19   | 1.89   |   |
| 11005 | Cactin         | -1.46 | 75   | 8.09   | 67   | 5.54   |   |
| 11006 | Cbx7           | -1.46 | 19   | 1.36   | 18   | 0.93   |   |
| 11007 | Ccdc141        | -1.46 | 17   | 0.56   | 20   | 0.39   |   |
| 11008 | LOC688963      | -1.46 | 48   | 38.28  | 50   | 26.23  |   |
| 11009 | Lrrc20         | -1.46 | 43   | 2.85   | 46   | 1.95   |   |
| 11010 | Lsm7           | -1.46 | 42   | 26.71  | 39   | 18.3   |   |
| 11011 | Map4k1         | -1.46 | 15   | 1.55   | 15   | 1.06   |   |
| 11012 | Marcksl1       | -1.46 | 2    | 2.87   | 2    | 1.97   |   |
| 11013 | MGC116121      | -1.46 | 70   | 12.17  | 73   | 8.34   |   |
| 11014 | Pex11g         | -1.46 | 46   | 3.77   | 41   | 2.58   |   |
| 11015 | Slain1         | -1.46 | 68   | 12.11  | 60   | 8.3    |   |
| 11016 | Smim8          | -1.46 | 20   | 2.96   | 22   | 2.03   |   |
| 11017 | Trim34         | -1.46 | 44   | 5.08   | 48   | 3.48   |   |
| 11018 | Tspy26         | -1.46 | 12   | 2.1    | 11   | 1.44   |   |
| 11019 | Emc8           | -1.46 | 109  | 32.7   | 104  | 22.41  |   |
| 11020 | LOC100911293   | -1.46 | 124  | 12.32  | 126  | 8.44   |   |
| 11021 | Zfr2           | -1.46 | 39   | 1.62   | 40   | 1.11   |   |
| 11022 | Pigx           | -1.46 | 137  | 44.46  | 141  | 30.45  |   |
| 11023 | Pebp1          | -1.46 | 418  | 137.43 | 387  | 94.1   |   |
| 11024 | Atp5o          | -1.46 | 280  | 114.82 | 262  | 78.61  |   |
| 11025 | Cxxc1          | -1.46 | 167  | 22.9   | 162  | 15.67  |   |
| 11026 | Acly           | -1.46 | 1180 | 89.87  | 1108 | 61.5   |   |
| 11027 | RGD1311739     | -1.46 | 71   | 11.27  | 84   | 7.71   |   |
| 11028 | Aen            | -1.46 | 74   | 10.68  | 73   | 7.3    |   |
| 11029 | Coq10a         | -1.46 | 67   | 9.48   | 68   | 6.48   |   |
| 11030 | Lrrc8c         | -1.46 | 390  | 17.29  | 374  | 11.82  |   |
| 11031 | Itpr3          | -1.46 | 63   | 2.39   | 64   | 1.63   |   |
| 11032 | Stat5a         | -1.46 | 54   | 5.81   | 50   | 3.97   |   |
| 11033 | Eif2ak3        | -1.46 | 146  | 9.35   | 144  | 6.39   |   |
| 11034 | Gm2a           | -1.46 | 613  | 106.81 | 562  | 72.97  |   |
| 11035 | Brix1          | -1.46 | 111  | 14.27  | 104  | 9.75   |   |
| 11036 | Tmx2           | -1.46 | 106  | 23.39  | 100  | 15.97  |   |
| 11037 | B3glct         | -1.46 | 89   | 9.83   | 78   | 6.71   |   |
| 11038 | Fzd8           | -1.46 | 0    | 2.79   | 0    | 1.9    |   |
| 11039 | Hmgn3          | -1.46 | 43   | 5.94   | 44   | 4.06   |   |
| 11040 | Map4k2         | -1.46 | 50   | 4.12   | 49   | 2.81   |   |
| 11041 | Slc22a23       | -1.46 | 252  | 10.01  | 236  | 6.83   |   |
| 11042 | Thap3          | -1.46 | 40   | 6.95   | 34   | 4.75   |   |
| 11043 | Tmem243        | -1.46 | 66   | 7.6    | 66   | 5.19   |   |
| 11044 | Tmem38b        | -1.47 | 355  | 44.85  | 321  | 30.6   |   |
| 11045 | Dcakd          | -1.47 | 366  | 59.13  | 363  | 40.35  |   |
| 11046 | Rpl13a         | -1.47 | 291  | 863.76 | 285  | 589.15 |   |
| 11047 | LOC100361694   | -1.47 | 50   | 46.59  | 44   | 31.77  |   |
| 11048 | Rprd1a         | -1.47 | 81   | 11.12  | 106  | 7.58   |   |
| 11049 | Agap1          | -1.47 | 332  | 11.53  | 321  | 7.86   |   |
| 11050 | Plk1           | -1.47 | 49   | 7.28   | 49   | 4.96   |   |
| 11051 | RGD1563349     | -1.47 | 136  | 13.98  | 137  | 9.51   |   |
| 11052 | Disp1          | -1.47 | 233  | 9.57   | 228  | 6.51   |   |
| 11053 | Eif6           | -1.47 | 290  | 81.27  | 264  | 55.28  |   |
| 11054 | Cd48           | -1.47 | 218  | 42.27  | 244  | 28.74  |   |
| 11055 | AABR07072602.1 | -1.47 | 19   | 5.05   | 18   | 3.44   |   |
| 11056 | Cln3           | -1.47 | 60   | 11.9   | 57   | 8.09   |   |
| 11057 | LOC100360056_2 | -1.47 | 0    | 21.76  | 0    | 14.79  |   |

Supplemental Table 3  
 FSH + Ad-E versus FSH + Ad-FOXO1(A3), 24 hours

|       | A            | B     | C    | D      | E    | F      | G |
|-------|--------------|-------|------|--------|------|--------|---|
| 11058 | Prr11        | -1.47 | 14   | 2.09   | 13   | 1.42   |   |
| 11059 | Rad51c       | -1.47 | 19   | 1.69   | 16   | 1.15   |   |
| 11060 | Supt7l       | -1.47 | 9    | 2.08   | 5    | 1.41   |   |
| 11061 | AC096370.3   | -1.47 | 0    | 2.23   | 0    | 1.52   |   |
| 11062 | Fastkd2      | -1.47 | 33   | 4.91   | 31   | 3.34   |   |
| 11063 | Hacd4        | -1.47 | 28   | 7.69   | 35   | 5.23   |   |
| 11064 | lsg15        | -1.47 | 11   | 3.03   | 14   | 2.06   |   |
| 11065 | LOC100911224 | -1.47 | 0    | 2.16   | 0    | 1.47   |   |
| 11066 | Lsm5         | -1.47 | 9    | 7.39   | 12   | 5.02   |   |
| 11067 | Map7d2       | -1.47 | 32   | 1.88   | 28   | 1.27   |   |
| 11068 | Mastl        | -1.47 | 146  | 2.2    | 178  | 1.49   |   |
| 11069 | Med9         | -1.47 | 50   | 6.35   | 51   | 4.32   |   |
| 11070 | Phpt1        | -1.47 | 39   | 18.82  | 42   | 12.79  |   |
| 11071 | Prrx1        | -1.47 | 21   | 4.62   | 28   | 3.14   |   |
| 11072 | RGD1562037   | -1.47 | 69   | 5.31   | 68   | 3.61   |   |
| 11073 | Rnf126       | -1.47 | 51   | 10.49  | 52   | 7.13   |   |
| 11074 | Rpl35a_5     | -1.47 | 0    | 11.96  | 0    | 8.13   |   |
| 11075 | Susd6        | -1.47 | 198  | 15.16  | 200  | 10.31  |   |
| 11076 | Timm10b_1    | -1.47 | 1    | 2.98   | 1    | 2.02   |   |
| 11077 | Tmem56       | -1.47 | 13   | 3.78   | 13   | 2.57   |   |
| 11078 | Tp53i13      | -1.47 | 55   | 11.23  | 55   | 7.64   |   |
| 11079 | Trim13       | -1.47 | 17   | 2.92   | 13   | 1.99   |   |
| 11080 | Glrx5        | -1.47 | 84   | 12.97  | 80   | 8.82   |   |
| 11081 | Stx1b        | -1.47 | 24   | 1.33   | 27   | 0.9    |   |
| 11082 | Cox4i1       | -1.47 | 435  | 195.65 | 399  | 132.94 |   |
| 11083 | Greb1        | -1.47 | 4244 | 176.77 | 3981 | 120.02 |   |
| 11084 | Igsf8        | -1.47 | 69   | 10.82  | 61   | 7.34   |   |
| 11085 | Dpy30        | -1.47 | 75   | 24.84  | 71   | 16.85  |   |
| 11086 | Zfp280b      | -1.47 | 272  | 25.64  | 256  | 17.39  |   |
| 11087 | Tmem165      | -1.47 | 133  | 18.77  | 130  | 12.73  |   |
| 11088 | Gria1        | -1.47 | 69   | 5.23   | 100  | 3.55   |   |
| 11089 | Lemd3        | -1.47 | 105  | 9.98   | 103  | 6.77   |   |
| 11090 | Nfkbia       | -1.47 | 135  | 29.84  | 119  | 20.24  |   |
| 11091 | Cox6b1_1     | -1.48 | 76   | 57.83  | 67   | 39.18  |   |
| 11092 | Trappc5      | -1.48 | 35   | 9.64   | 38   | 6.53   |   |
| 11093 | Rab24        | -1.48 | 90   | 7.08   | 91   | 4.8    |   |
| 11094 | Pgk1         | -1.48 | 304  | 68.22  | 289  | 46.21  |   |
| 11095 | Rnf166       | -1.48 | 110  | 17.54  | 125  | 11.88  |   |
| 11096 | Def8         | -1.48 | 84   | 8.56   | 70   | 5.79   |   |
| 11097 | Tmem9        | -1.48 | 292  | 60.96  | 298  | 41.26  |   |
| 11098 | Cables2      | -1.48 | 34   | 5.28   | 41   | 3.57   |   |
| 11099 | Gpc3         | -1.48 | 32   | 4.11   | 29   | 2.78   |   |
| 11100 | LOC499602    | -1.48 | 46   | 2.32   | 61   | 1.57   |   |
| 11101 | Lym4         | -1.48 | 55   | 7.13   | 52   | 4.82   |   |
| 11102 | Relt         | -1.48 | 23   | 2.74   | 24   | 1.86   |   |
| 11103 | Rhbdd2       | -1.48 | 66   | 11.5   | 66   | 7.78   |   |
| 11104 | Rnf7         | -1.48 | 86   | 18.16  | 91   | 12.28  |   |
| 11105 | Slc52a2      | -1.48 | 48   | 5.13   | 41   | 3.47   |   |
| 11106 | Aacs         | -1.48 | 166  | 16.68  | 150  | 11.28  |   |
| 11107 | Fmo5         | -1.48 | 54   | 6.79   | 49   | 4.59   |   |
| 11108 | Zdhhc15      | -1.48 | 35   | 2.64   | 44   | 1.78   |   |
| 11109 | Ccdc61       | -1.48 | 69   | 5.92   | 80   | 4      |   |
| 11110 | Cd320        | -1.48 | 60   | 14.44  | 53   | 9.76   |   |
| 11111 | Fam127b      | -1.48 | 166  | 48.59  | 149  | 32.82  |   |

Supplemental Table 3  
 FSH + Ad-E versus FSH + Ad-FOXO1(A3), 24 hours

|       | A              | B     | C    | D      | E    | F      | G |
|-------|----------------|-------|------|--------|------|--------|---|
| 11112 | Dbp            | -1.48 | 41   | 6.59   | 44   | 4.45   |   |
| 11113 | Mocs3          | -1.48 | 31   | 5.76   | 28   | 3.89   |   |
| 11114 | Abca7          | -1.48 | 31   | 1.65   | 28   | 1.11   |   |
| 11115 | Tlr5           | -1.48 | 41   | 3.49   | 37   | 2.35   |   |
| 11116 | Stard3         | -1.48 | 175  | 21.23  | 208  | 14.32  |   |
| 11117 | H2afx          | -1.48 | 91   | 25.05  | 78   | 16.89  |   |
| 11118 | Mb21d2         | -1.48 | 124  | 10.69  | 136  | 7.21   |   |
| 11119 | Plxna3         | -1.48 | 148  | 7.02   | 135  | 4.74   |   |
| 11120 | Crym           | -1.48 | 451  | 122.09 | 420  | 82.29  |   |
| 11121 | Uhrf1bp1       | -1.48 | 189  | 11.68  | 185  | 7.87   |   |
| 11122 | Edf1           | -1.48 | 143  | 69.24  | 127  | 46.63  |   |
| 11123 | AABR07005779.2 | -1.49 | 6    | 3.58   | 7    | 2.41   |   |
| 11124 | Blzf1          | -1.49 | 44   | 6.31   | 42   | 4.24   |   |
| 11125 | Rn60_X_0691.2  | -1.49 | 10   | 4.44   | 9    | 2.99   |   |
| 11126 | Smyd4          | -1.49 | 30   | 2.11   | 32   | 1.42   |   |
| 11127 | Srp14          | -1.49 | 41   | 30.21  | 24   | 20.33  |   |
| 11128 | Sssca1         | -1.49 | 42   | 13.74  | 36   | 9.25   |   |
| 11129 | Suv420h2       | -1.49 | 129  | 12.01  | 130  | 8.08   |   |
| 11130 | Akt1s1         | -1.49 | 124  | 20.61  | 126  | 13.87  |   |
| 11131 | Bcas2          | -1.49 | 48   | 13.21  | 60   | 8.89   |   |
| 11132 | Cdca3          | -1.49 | 34   | 9.71   | 33   | 6.53   |   |
| 11133 | Cpxm1          | -1.49 | 20   | 3.06   | 18   | 2.06   |   |
| 11134 | Gas8           | -1.49 | 23   | 2.07   | 28   | 1.39   |   |
| 11135 | Kif24          | -1.49 | 28   | 0.81   | 28   | 0.55   |   |
| 11136 | Krt10          | -1.49 | 14   | 1.67   | 19   | 1.12   |   |
| 11137 | LOC100912106   | -1.49 | 0    | 5.63   | 0    | 3.79   |   |
| 11138 | Nicn1          | -1.49 | 60   | 9.75   | 57   | 6.56   |   |
| 11139 | Qdpr           | -1.49 | 72   | 19.06  | 70   | 12.82  |   |
| 11140 | RGD1305587     | -1.49 | 9    | 2.93   | 8    | 1.97   |   |
| 11141 | Slc25a35       | -1.49 | 25   | 4.25   | 18   | 2.86   |   |
| 11142 | Slc2a10        | -1.49 | 32   | 2.64   | 31   | 1.78   |   |
| 11143 | Tm6sf1         | -1.49 | 62   | 3.78   | 78   | 2.55   |   |
| 11144 | Fancb          | -1.49 | 15   | 1.16   | 12   | 0.78   |   |
| 11145 | Vstm2b         | -1.49 | 14   | 1.77   | 16   | 1.19   |   |
| 11146 | Mfge8          | -1.49 | 1844 | 302.88 | 1668 | 203.76 |   |
| 11147 | Agpat1         | -1.49 | 98   | 35.02  | 61   | 23.55  |   |
| 11148 | Hsd17b11       | -1.49 | 154  | 29.3   | 158  | 19.7   |   |
| 11149 | Trabd          | -1.49 | 157  | 17.98  | 163  | 12.08  |   |
| 11150 | Ubqln2         | -1.49 | 323  | 34.8   | 290  | 23.38  |   |
| 11151 | Ephx1          | -1.49 | 420  | 76.29  | 422  | 51.27  |   |
| 11152 | Gpx1           | -1.49 | 70   | 28.62  | 66   | 19.22  |   |
| 11153 | Pcyt1a         | -1.49 | 1277 | 101.04 | 1164 | 67.86  |   |
| 11154 | Cog5           | -1.49 | 224  | 21.87  | 229  | 14.68  |   |
| 11155 | Ldlrad3        | -1.49 | 136  | 8.27   | 141  | 5.55   |   |
| 11156 | AABR07034742.1 | -1.49 | 157  | 52.64  | 135  | 35.3   |   |
| 11157 | Unc50          | -1.49 | 134  | 30.02  | 145  | 20.13  |   |
| 11158 | Decr1          | -1.49 | 176  | 39.4   | 192  | 26.41  |   |
| 11159 | Insig2         | -1.49 | 45   | 10.6   | 51   | 7.1    |   |
| 11160 | Vwa8           | -1.49 | 42   | 7.28   | 49   | 4.88   |   |
| 11161 | Elmo1          | -1.49 | 457  | 43.85  | 464  | 29.39  |   |
| 11162 | Adamts2        | -1.49 | 2026 | 95.79  | 1932 | 64.19  |   |
| 11163 | Arse           | -1.49 | 65   | 9.47   | 64   | 6.34   |   |
| 11164 | Polr2j         | -1.49 | 53   | 23.87  | 46   | 15.99  |   |
| 11165 | Abtb1          | -1.49 | 79   | 12.86  | 82   | 8.61   |   |

Supplemental Table 3  
 FSH + Ad-E versus FSH + Ad-FOXO1(A3), 24 hours

|       | A              | B     | C    | D      | E    | F      | G |
|-------|----------------|-------|------|--------|------|--------|---|
| 11166 | Lama1          | -1.49 | 965  | 30.79  | 892  | 20.62  |   |
| 11167 | Tpgs2          | -1.49 | 128  | 42.81  | 143  | 28.65  |   |
| 11168 | Vcan           | -1.49 | 1277 | 37.89  | 1152 | 25.35  |   |
| 11169 | Cep135         | -1.49 | 47   | 2.34   | 49   | 1.57   |   |
| 11170 | Abcc10         | -1.49 | 43   | 1.87   | 40   | 1.25   |   |
| 11171 | Csad           | -1.49 | 85   | 13.05  | 81   | 8.73   |   |
| 11172 | Ptger1         | -1.49 | 30   | 3.58   | 39   | 2.39   |   |
| 11173 | Rnaseh2c       | -1.49 | 20   | 9.44   | 18   | 6.31   |   |
| 11174 | Sec11c         | -1.49 | 35   | 8.47   | 28   | 5.67   |   |
| 11175 | Tubb4a         | -1.49 | 20   | 3.21   | 19   | 2.14   |   |
| 11176 | RGD1303003     | -1.5  | 114  | 29.51  | 105  | 19.73  |   |
| 11177 | Ii11ra1        | -1.5  | 71   | 13.95  | 65   | 9.32   |   |
| 11178 | Mrps7          | -1.5  | 44   | 17.07  | 46   | 11.4   |   |
| 11179 | Gpr180         | -1.5  | 174  | 14.89  | 165  | 9.95   |   |
| 11180 | Psmb10         | -1.5  | 77   | 27.26  | 69   | 18.21  |   |
| 11181 | Usp39          | -1.5  | 141  | 14.37  | 180  | 9.59   |   |
| 11182 | Psmb4          | -1.5  | 316  | 129.03 | 275  | 86.14  |   |
| 11183 | Mdh1           | -1.5  | 679  | 175.11 | 605  | 116.89 |   |
| 11184 | Rnd2           | -1.5  | 29   | 7.53   | 26   | 5.02   |   |
| 11185 | Rchy1          | -1.5  | 110  | 18.19  | 110  | 12.14  |   |
| 11186 | Snx29          | -1.5  | 229  | 9.24   | 271  | 6.17   |   |
| 11187 | Bad            | -1.5  | 80   | 23.51  | 86   | 15.68  |   |
| 11188 | Wasf1          | -1.5  | 78   | 7.52   | 78   | 5.02   |   |
| 11189 | Cdk2ap1        | -1.5  | 251  | 68.52  | 255  | 45.7   |   |
| 11190 | Acad9          | -1.5  | 115  | 13.96  | 107  | 9.31   |   |
| 11191 | AABR07009397.1 | -1.5  | 3    | 17.35  | 1    | 11.57  |   |
| 11192 | Lrp11          | -1.5  | 132  | 12.29  | 127  | 8.2    |   |
| 11193 | AC127920.1     | -1.5  | 16   | 17.73  | 11   | 11.82  |   |
| 11194 | 2310067B10Rik  | -1.5  | 220  | 17.5   | 204  | 11.66  |   |
| 11195 | H3f3b_1        | -1.5  | 1148 | 251.81 | 1023 | 167.81 |   |
| 11196 | Tubg1          | -1.5  | 181  | 52.19  | 153  | 34.78  |   |
| 11197 | Znrf2          | -1.5  | 297  | 14.99  | 289  | 9.99   |   |
| 11198 | Slc25a12       | -1.5  | 157  | 18.3   | 179  | 12.19  |   |
| 11199 | Gria3          | -1.5  | 468  | 14.85  | 447  | 9.89   |   |
| 11200 | Nr4a1          | -1.5  | 67   | 7.49   | 64   | 4.99   |   |
| 11201 | Sipa1l3        | -1.5  | 258  | 8.3    | 240  | 5.53   |   |
| 11202 | Rpl26          | -1.5  | 182  | 119.17 | 91   | 79.32  |   |
| 11203 | Galt           | -1.5  | 93   | 22.72  | 83   | 15.12  |   |
| 11204 | RGD1562299     | -1.5  | 119  | 7.74   | 109  | 5.15   |   |
| 11205 | Pigs           | -1.5  | 286  | 41.49  | 258  | 27.6   |   |
| 11206 | Gas6           | -1.5  | 2371 | 242.47 | 2145 | 161.21 |   |
| 11207 | Chac2          | -1.5  | 13   | 2.7    | 16   | 1.8    |   |
| 11208 | Ncoa7          | -1.5  | 157  | 7.82   | 178  | 5.2    |   |
| 11209 | Ppan           | -1.5  | 83   | 15.97  | 71   | 10.62  |   |
| 11210 | 5_8S_rRNA_23   | -1.5  | 4    | 21.16  | 1    | 14.06  |   |
| 11211 | Abhd14a        | -1.5  | 28   | 4      | 21   | 2.66   |   |
| 11212 | Ddias          | -1.5  | 19   | 1.96   | 17   | 1.3    |   |
| 11213 | Grk5           | -1.5  | 153  | 8.31   | 113  | 5.52   |   |
| 11214 | Hmg1l1_2       | -1.5  | 1    | 5.08   | 0    | 3.37   |   |
| 11215 | Loxl2          | -1.5  | 23   | 1.45   | 31   | 0.96   |   |
| 11216 | Lynx1          | -1.5  | 12   | 0.86   | 8    | 0.57   |   |
| 11217 | Magel2         | -1.5  | 9    | 0.86   | 8    | 0.57   |   |
| 11218 | Nr3c2          | -1.5  | 49   | 2.48   | 58   | 1.65   |   |
| 11219 | Nudt18         | -1.5  | 29   | 7.05   | 27   | 4.69   |   |



Supplemental Table 3  
 FSH + Ad-E versus FSH + Ad-FOXO1(A3), 24 hours

|       | A              | B     | C    | D      | E    | F      | G |
|-------|----------------|-------|------|--------|------|--------|---|
| 11220 | Preb           | -1.5  | 33   | 13.09  | 14   | 8.7    |   |
| 11221 | Ptgdr2         | -1.5  | 9    | 2.04   | 8    | 1.35   |   |
| 11222 | RGD1310110     | -1.5  | 58   | 8.47   | 49   | 5.63   |   |
| 11223 | Trib3          | -1.5  | 10   | 1.68   | 10   | 1.12   |   |
| 11224 | Zfp235         | -1.5  | 66   | 1.38   | 85   | 0.92   |   |
| 11225 | Cpt1b          | -1.5  | 11   | 0.86   | 9    | 0.57   |   |
| 11226 | Rpn1           | -1.51 | 1357 | 219.17 | 1234 | 145.54 |   |
| 11227 | Dir2           | -1.51 | 150  | 16.98  | 141  | 11.27  |   |
| 11228 | Sra1           | -1.51 | 108  | 32.37  | 103  | 21.49  |   |
| 11229 | Fam73b         | -1.51 | 185  | 15.03  | 173  | 9.97   |   |
| 11230 | Ube2m          | -1.51 | 340  | 60.5   | 299  | 40.13  |   |
| 11231 | Dtx2           | -1.51 | 89   | 8.42   | 98   | 5.59   |   |
| 11232 | Fbxl12         | -1.51 | 58   | 10.11  | 51   | 6.7    |   |
| 11233 | Osbpl7         | -1.51 | 61   | 4.53   | 75   | 3      |   |
| 11234 | Aprt           | -1.51 | 85   | 52.68  | 76   | 34.9   |   |
| 11235 | Atg101         | -1.51 | 84   | 17.7   | 80   | 11.72  |   |
| 11236 | Mef2bnb        | -1.51 | 48   | 34.91  | 61   | 23.12  |   |
| 11237 | Myom2          | -1.51 | 37   | 2.81   | 34   | 1.86   |   |
| 11238 | Top3b          | -1.51 | 149  | 16.03  | 143  | 10.62  |   |
| 11239 | Myl12b         | -1.51 | 352  | 106.01 | 465  | 70.17  |   |
| 11240 | Adcy9          | -1.51 | 334  | 18.59  | 348  | 12.3   |   |
| 11241 | Slc25a13       | -1.51 | 40   | 6.48   | 56   | 4.29   |   |
| 11242 | Xylt2          | -1.51 | 154  | 15.85  | 139  | 10.48  |   |
| 11243 | Lsg1           | -1.51 | 124  | 9.46   | 93   | 6.25   |   |
| 11244 | Csnk2b         | -1.51 | 214  | 42.27  | 191  | 27.94  |   |
| 11245 | Fv1            | -1.51 | 148  | 29.9   | 133  | 19.75  |   |
| 11246 | Txndc5         | -1.51 | 1235 | 164.73 | 1106 | 108.79 |   |
| 11247 | Syngn2         | -1.51 | 95   | 35.98  | 93   | 23.75  |   |
| 11248 | Ncln           | -1.52 | 336  | 37.93  | 309  | 25.03  |   |
| 11249 | Letm2          | -1.52 | 56   | 3.58   | 45   | 2.36   |   |
| 11250 | Piga           | -1.52 | 25   | 1.98   | 33   | 1.3    |   |
| 11251 | Tmed8          | -1.52 | 44   | 6.27   | 49   | 4.14   |   |
| 11252 | Xkr5           | -1.52 | 27   | 2.82   | 22   | 1.86   |   |
| 11253 | Pgap2          | -1.52 | 57   | 4.61   | 46   | 3.04   |   |
| 11254 | Mmab           | -1.52 | 18   | 1.94   | 20   | 1.28   |   |
| 11255 | Zer1           | -1.52 | 432  | 32.99  | 417  | 21.76  |   |
| 11256 | AABR07033324.1 | -1.52 | 26   | 53.85  | 40   | 35.49  |   |
| 11257 | Fdft1          | -1.52 | 580  | 55.03  | 541  | 36.26  |   |
| 11258 | Gtpbp3         | -1.52 | 46   | 6      | 44   | 3.95   |   |
| 11259 | Thumpd2        | -1.52 | 94   | 7.6    | 94   | 5.01   |   |
| 11260 | Surf4          | -1.52 | 776  | 69.61  | 686  | 45.85  |   |
| 11261 | Cox16          | -1.52 | 40   | 11.76  | 38   | 7.73   |   |
| 11262 | Elp5           | -1.52 | 177  | 22.93  | 218  | 15.09  |   |
| 11263 | LOC100911440   | -1.52 | 0    | 3.73   | 0    | 2.45   |   |
| 11264 | Myeov2         | -1.52 | 56   | 37.25  | 54   | 24.51  |   |
| 11265 | RGD1561777_1   | -1.52 | 22   | 2.66   | 18   | 1.75   |   |
| 11266 | Klhdc3         | -1.52 | 268  | 43.95  | 247  | 28.89  |   |
| 11267 | Fiz1           | -1.52 | 100  | 11.6   | 91   | 7.62   |   |
| 11268 | Prmt2          | -1.52 | 192  | 30.26  | 177  | 19.88  |   |
| 11269 | Zfp707         | -1.52 | 25   | 7.05   | 28   | 4.63   |   |
| 11270 | Dnase2         | -1.52 | 34   | 8.37   | 30   | 5.5    |   |
| 11271 | Tmem248        | -1.52 | 357  | 63.26  | 328  | 41.55  |   |
| 11272 | Rexo1          | -1.52 | 226  | 15.34  | 206  | 10.08  |   |
| 11273 | Atp6v0e2       | -1.52 | 119  | 48.3   | 105  | 31.72  |   |

Supplemental Table 3  
 FSH + Ad-E versus FSH + Ad-FOXO1(A3), 24 hours

|       | A             | B     | C    | D      | E    | F      | G |
|-------|---------------|-------|------|--------|------|--------|---|
| 11274 | Abhd4         | -1.52 | 631  | 94.61  | 554  | 62.12  |   |
| 11275 | Cetn2         | -1.52 | 43   | 11.63  | 40   | 7.64   |   |
| 11276 | Urod          | -1.52 | 87   | 22.16  | 77   | 14.54  |   |
| 11277 | Bambi         | -1.52 | 408  | 93.11  | 346  | 61.12  |   |
| 11278 | Mocs2         | -1.52 | 107  | 22.33  | 109  | 14.65  |   |
| 11279 | Hnrnpc        | -1.52 | 45   | 99.56  | 36   | 65.32  |   |
| 11280 | Tubb4b        | -1.53 | 519  | 117.83 | 463  | 77.25  |   |
| 11281 | Agri          | -1.53 | 243  | 10.42  | 204  | 6.82   |   |
| 11282 | Atp1a1        | -1.53 | 1664 | 163.71 | 1465 | 107.13 |   |
| 11283 | Adamts3       | -1.53 | 13   | 0.69   | 13   | 0.45   |   |
| 11284 | Rpp30         | -1.53 | 70   | 6.04   | 84   | 3.95   |   |
| 11285 | 6720489N17Rik | -1.53 | 18   | 18.39  | 22   | 12.03  |   |
| 11286 | Adcy3         | -1.53 | 17   | 0.51   | 22   | 0.33   |   |
| 11287 | B3galt1       | -1.53 | 9    | 1.08   | 8    | 0.71   |   |
| 11288 | Dnhd1         | -1.53 | 35   | 0.58   | 38   | 0.38   |   |
| 11289 | Exosc5        | -1.53 | 19   | 5.65   | 14   | 3.7    |   |
| 11290 | Ftsj2         | -1.53 | 19   | 3.77   | 20   | 2.47   |   |
| 11291 | G6pc3         | -1.53 | 89   | 21.66  | 85   | 14.17  |   |
| 11292 | Hddc3         | -1.53 | 18   | 3.66   | 15   | 2.4    |   |
| 11293 | Hsd17b13      | -1.53 | 22   | 2.23   | 19   | 1.46   |   |
| 11294 | Il18bp        | -1.53 | 18   | 6.2    | 21   | 4.06   |   |
| 11295 | LOC100911515  | -1.53 | 2    | 39.09  | 1    | 25.57  |   |
| 11296 | LOC100911750  | -1.53 | 0    | 1.46   | 0    | 0.96   |   |
| 11297 | MGC116202     | -1.53 | 12   | 1.46   | 11   | 0.96   |   |
| 11298 | Micb          | -1.53 | 72   | 9.66   | 78   | 6.32   |   |
| 11299 | Nusap1        | -1.53 | 37   | 2.07   | 32   | 1.35   |   |
| 11300 | Pask          | -1.53 | 37   | 1.88   | 31   | 1.23   |   |
| 11301 | Pmf1          | -1.53 | 42   | 9.51   | 45   | 6.22   |   |
| 11302 | SNORD36_4     | -1.53 | 0    | 41.98  | 0    | 27.46  |   |
| 11303 | Spep          | -1.53 | 14   | 0.24   | 18   | 0.16   |   |
| 11304 | Tmem141       | -1.53 | 31   | 11.14  | 29   | 7.29   |   |
| 11305 | Tmem42        | -1.53 | 35   | 6.34   | 34   | 4.15   |   |
| 11306 | Ankle1        | -1.53 | 15   | 1.8    | 12   | 1.18   |   |
| 11307 | Cux2          | -1.53 | 17   | 0.57   | 26   | 0.37   |   |
| 11308 | Haus1_1       | -1.53 | 0    | 3.46   | 0    | 2.26   |   |
| 11309 | Kcnd1         | -1.53 | 10   | 0.78   | 7    | 0.51   |   |
| 11310 | Pip5k1b       | -1.53 | 34   | 1      | 45   | 0.66   |   |
| 11311 | Rhpn1         | -1.53 | 9    | 1.09   | 7    | 0.71   |   |
| 11312 | Sfxn2         | -1.53 | 21   | 2.8    | 16   | 1.83   |   |
| 11313 | Zdhhc24       | -1.53 | 26   | 3.46   | 24   | 2.26   |   |
| 11314 | Pik3r2        | -1.53 | 266  | 27.82  | 232  | 18.19  |   |
| 11315 | Isg20l2       | -1.53 | 58   | 17.55  | 53   | 11.46  |   |
| 11316 | Olfml3        | -1.53 | 159  | 32.54  | 138  | 21.25  |   |
| 11317 | Bbs9          | -1.53 | 81   | 7.68   | 91   | 5.01   |   |
| 11318 | RGD1560755    | -1.53 | 55   | 9.23   | 48   | 6.02   |   |
| 11319 | Pla2g6        | -1.53 | 127  | 9.54   | 133  | 6.22   |   |
| 11320 | Hacd3         | -1.53 | 352  | 45.46  | 331  | 29.63  |   |
| 11321 | Kras          | -1.53 | 61   | 9.98   | 68   | 6.5    |   |
| 11322 | Tbc1d25       | -1.53 | 158  | 5.66   | 204  | 3.69   |   |
| 11323 | Isca1         | -1.53 | 202  | 36.56  | 186  | 23.82  |   |
| 11324 | Cluh          | -1.54 | 614  | 49.46  | 547  | 32.22  |   |
| 11325 | Lysmd1        | -1.54 | 31   | 5.49   | 29   | 3.58   |   |
| 11326 | Nfix          | -1.54 | 81   | 12.85  | 110  | 8.37   |   |
| 11327 | Panx1         | -1.54 | 50   | 3.85   | 59   | 2.51   |   |

Supplemental Table 3  
 FSH + Ad-E versus FSH + Ad-FOXO1(A3), 24 hours

|       | A               | B     | C    | D      | E    | F      | G |
|-------|-----------------|-------|------|--------|------|--------|---|
| 11328 | Zdhhc7          | -1.54 | 146  | 18.93  | 128  | 12.32  |   |
| 11329 | Igsf11          | -1.54 | 979  | 65.65  | 970  | 42.72  |   |
| 11330 | Cplx2           | -1.54 | 110  | 11.26  | 105  | 7.33   |   |
| 11331 | Pla2g16         | -1.54 | 88   | 34.29  | 78   | 22.31  |   |
| 11332 | AABR07063855.1  | -1.54 | 10   | 4.57   | 14   | 2.97   |   |
| 11333 | Ccnb1           | -1.54 | 48   | 10.37  | 43   | 6.74   |   |
| 11334 | Taf1c           | -1.54 | 76   | 8.12   | 67   | 5.28   |   |
| 11335 | Arntl           | -1.54 | 53   | 4.63   | 51   | 3      |   |
| 11336 | Coa3            | -1.54 | 10   | 26.54  | 12   | 17.22  |   |
| 11337 | Lta4h           | -1.54 | 124  | 19.01  | 109  | 12.33  |   |
| 11338 | Ass1            | -1.54 | 211  | 43.73  | 199  | 28.37  |   |
| 11339 | Gps1            | -1.54 | 432  | 71.36  | 371  | 46.29  |   |
| 11340 | Lnx1            | -1.54 | 53   | 1.76   | 58   | 1.14   |   |
| 11341 | LOC100912599    | -1.54 | 0    | 8.5    | 0    | 5.51   |   |
| 11342 | Nid2            | -1.54 | 37   | 1.19   | 32   | 0.77   |   |
| 11343 | Rabepk          | -1.54 | 57   | 6.91   | 59   | 4.47   |   |
| 11344 | Ado             | -1.54 | 15   | 4.65   | 13   | 3.01   |   |
| 11345 | Alkbh4          | -1.54 | 35   | 5.7    | 28   | 3.69   |   |
| 11346 | ENSRNOG00000054 | -1.54 | 43   | 4.55   | 76   | 2.95   |   |
| 11347 | Nfs1            | -1.54 | 22   | 10.82  | 20   | 7.01   |   |
| 11348 | Otud6b          | -1.54 | 65   | 6.99   | 72   | 4.53   |   |
| 11349 | RGD1562409      | -1.54 | 0    | 6.76   | 0    | 4.38   |   |
| 11350 | Slc9a5          | -1.54 | 25   | 1.31   | 24   | 0.85   |   |
| 11351 | Yif1b_1         | -1.54 | 1    | 18.65  | 0    | 12.09  |   |
| 11352 | Stk24           | -1.54 | 371  | 92.53  | 335  | 59.94  |   |
| 11353 | Dfnb31          | -1.54 | 283  | 17.47  | 240  | 11.31  |   |
| 11354 | Clstn1          | -1.55 | 666  | 51.09  | 591  | 33.06  |   |
| 11355 | Mageh1          | -1.55 | 67   | 19.42  | 58   | 12.57  |   |
| 11356 | Skiv2l          | -1.55 | 188  | 17.21  | 167  | 11.14  |   |
| 11357 | Stk35           | -1.55 | 58   | 5.55   | 63   | 3.59   |   |
| 11358 | Lonrf2          | -1.55 | 406  | 20.32  | 356  | 13.14  |   |
| 11359 | Nvl             | -1.55 | 138  | 8.3    | 131  | 5.37   |   |
| 11360 | Pfkm            | -1.55 | 841  | 95.1   | 732  | 61.5   |   |
| 11361 | Ndc80           | -1.55 | 49   | 3.91   | 51   | 2.53   |   |
| 11362 | Sirt7           | -1.55 | 56   | 7.7    | 58   | 4.98   |   |
| 11363 | Acvr1b          | -1.55 | 120  | 7.7    | 118  | 4.98   |   |
| 11364 | Cbx4            | -1.55 | 68   | 14.77  | 60   | 9.55   |   |
| 11365 | Pcmt1           | -1.55 | 96   | 24.98  | 98   | 16.15  |   |
| 11366 | Scyl1           | -1.55 | 219  | 28.32  | 197  | 18.29  |   |
| 11367 | Srsf7           | -1.55 | 358  | 86.12  | 338  | 55.63  |   |
| 11368 | Cdk20           | -1.55 | 57   | 7.53   | 44   | 4.86   |   |
| 11369 | Ckap2           | -1.55 | 29   | 3.12   | 22   | 2.02   |   |
| 11370 | Pcdhga9         | -1.55 | 20   | 3.29   | 18   | 2.12   |   |
| 11371 | Fuca1           | -1.55 | 1301 | 272.09 | 1137 | 175.64 |   |
| 11372 | Rhoc            | -1.55 | 155  | 30.15  | 136  | 19.46  |   |
| 11373 | Polr2c          | -1.55 | 167  | 45.45  | 149  | 29.33  |   |
| 11374 | Fgfr1           | -1.55 | 150  | 12.06  | 136  | 7.78   |   |
| 11375 | Nprl2           | -1.55 | 53   | 12.02  | 45   | 7.75   |   |
| 11376 | Acy1            | -1.55 | 57   | 11.72  | 49   | 7.56   |   |
| 11377 | Ppwd1           | -1.55 | 68   | 7.53   | 69   | 4.86   |   |
| 11378 | Efemp2          | -1.55 | 314  | 65.37  | 278  | 42.16  |   |
| 11379 | Col14a1         | -1.55 | 159  | 9.28   | 125  | 5.98   |   |
| 11380 | Thns12          | -1.55 | 54   | 5.8    | 56   | 3.74   |   |
| 11381 | Nutf2           | -1.55 | 276  | 50.36  | 267  | 32.45  |   |

Supplemental Table 3  
 FSH + Ad-E versus FSH + Ad-FOXO1(A3), 24 hours

|       | A              | B     | C    | D       | E    | F      | G |
|-------|----------------|-------|------|---------|------|--------|---|
| 11382 | Ndufs8         | -1.55 | 122  | 59.54   | 108  | 38.36  |   |
| 11383 | Csk            | -1.55 | 176  | 24.8    | 166  | 15.98  |   |
| 11384 | Gltp           | -1.55 | 66   | 14.27   | 62   | 9.19   |   |
| 11385 | Ncbp1          | -1.55 | 148  | 21.28   | 128  | 13.71  |   |
| 11386 | Rnf8           | -1.55 | 59   | 6.09    | 82   | 3.92   |   |
| 11387 | Slc5a6         | -1.55 | 82   | 8.57    | 73   | 5.52   |   |
| 11388 | Ifi30          | -1.55 | 78   | 20.64   | 70   | 13.29  |   |
| 11389 | Nrbp2          | -1.55 | 588  | 74.54   | 509  | 47.97  |   |
| 11390 | Spns1          | -1.55 | 110  | 13.09   | 90   | 8.42   |   |
| 11391 | Scd1           | -1.55 | 588  | 51.7    | 519  | 33.27  |   |
| 11392 | Hmgcl          | -1.55 | 55   | 10.49   | 52   | 6.75   |   |
| 11393 | Oaz1           | -1.55 | 962  | 487.01  | 880  | 313.22 |   |
| 11394 | Nsmf           | -1.56 | 63   | 6.24    | 52   | 4.02   |   |
| 11395 | Rbbp9          | -1.56 | 188  | 32.35   | 178  | 20.79  |   |
| 11396 | Mtm1           | -1.56 | 143  | 18.88   | 121  | 12.13  |   |
| 11397 | Prr3           | -1.56 | 146  | 16.63   | 129  | 10.68  |   |
| 11398 | RGD1311756     | -1.56 | 105  | 4.25    | 107  | 2.73   |   |
| 11399 | Lbr            | -1.56 | 96   | 15.16   | 91   | 9.74   |   |
| 11400 | Ldlr           | -1.56 | 1457 | 110.19  | 1262 | 70.75  |   |
| 11401 | Imp4           | -1.56 | 101  | 19.1    | 85   | 12.26  |   |
| 11402 | Diablo         | -1.56 | 58   | 27.7    | 56   | 17.78  |   |
| 11403 | Slc25a22       | -1.56 | 5    | 20.2    | 3    | 12.96  |   |
| 11404 | Ech1           | -1.56 | 174  | 52.12   | 155  | 33.43  |   |
| 11405 | LOC100360645   | -1.56 | 4446 | 1935.57 | 3828 | 1241.4 |   |
| 11406 | Abhd11         | -1.56 | 17   | 4.43    | 16   | 2.84   |   |
| 11407 | Mrgbp          | -1.56 | 0    | 8.24    | 0    | 5.28   |   |
| 11408 | Pald1          | -1.56 | 101  | 7.7     | 84   | 4.94   |   |
| 11409 | Ppp1r3b        | -1.56 | 7    | 0.58    | 7    | 0.37   |   |
| 11410 | Rab36          | -1.56 | 34   | 2.03    | 17   | 1.3    |   |
| 11411 | Srxn1          | -1.56 | 50   | 3.46    | 49   | 2.22   |   |
| 11412 | Tmem62         | -1.56 | 37   | 5.25    | 47   | 3.36   |   |
| 11413 | Ube2c          | -1.56 | 43   | 5.25    | 37   | 3.36   |   |
| 11414 | AABR07034260.1 | -1.56 | 7    | 2.81    | 11   | 1.8    |   |
| 11415 | Adgrg3         | -1.56 | 29   | 0.81    | 19   | 0.52   |   |
| 11416 | Astn2          | -1.56 | 79   | 0.56    | 57   | 0.36   |   |
| 11417 | B3galt6        | -1.56 | 28   | 4.74    | 24   | 3.04   |   |
| 11418 | Bub1b          | -1.56 | 53   | 3.73    | 46   | 2.39   |   |
| 11419 | Dimt1          | -1.56 | 104  | 7.53    | 120  | 4.83   |   |
| 11420 | Dohh           | -1.56 | 85   | 16.77   | 73   | 10.75  |   |
| 11421 | Gmppa          | -1.56 | 87   | 15.34   | 69   | 9.83   |   |
| 11422 | Jmjd6          | -1.56 | 42   | 7.46    | 37   | 4.78   |   |
| 11423 | LOC100360750   | -1.56 | 0    | 3.89    | 0    | 2.49   |   |
| 11424 | LOC100911274   | -1.56 | 79   | 18.64   | 66   | 11.94  |   |
| 11425 | Mcf2l          | -1.56 | 21   | 0.41    | 16   | 0.26   |   |
| 11426 | Mctp2          | -1.56 | 30   | 0.29    | 25   | 0.19   |   |
| 11427 | Pdlim4         | -1.56 | 120  | 30.17   | 103  | 19.34  |   |
| 11428 | Peli3          | -1.56 | 9    | 0.43    | 9    | 0.27   |   |
| 11429 | Pik3r5         | -1.56 | 9    | 0.54    | 11   | 0.34   |   |
| 11430 | Plid3          | -1.56 | 293  | 46.89   | 250  | 30.05  |   |
| 11431 | Plod1          | -1.56 | 89   | 10.31   | 79   | 6.61   |   |
| 11432 | RGD1308117     | -1.56 | 23   | 2.61    | 16   | 1.67   |   |
| 11433 | RGD1310049     | -1.56 | 20   | 1.22    | 15   | 0.78   |   |
| 11434 | Senp8          | -1.56 | 36   | 5.16    | 47   | 3.31   |   |
| 11435 | Slc22a5        | -1.56 | 215  | 2.87    | 327  | 1.84   |   |

Supplemental Table 3  
 FSH + Ad-E versus FSH + Ad-FOXO1(A3), 24 hours

|       | A              | B     | C    | D      | E    | F      | G |
|-------|----------------|-------|------|--------|------|--------|---|
| 11436 | Soga3          | -1.56 | 18   | 0.89   | 17   | 0.57   |   |
| 11437 | Lap3           | -1.56 | 161  | 24.18  | 146  | 15.48  |   |
| 11438 | Tyms           | -1.56 | 101  | 21.28  | 86   | 13.61  |   |
| 11439 | Nsmce4a        | -1.56 | 131  | 41.87  | 101  | 26.78  |   |
| 11440 | Emc3           | -1.56 | 317  | 56.13  | 293  | 35.89  |   |
| 11441 | Yipf6          | -1.57 | 176  | 14.17  | 152  | 9.05   |   |
| 11442 | Rpl28          | -1.57 | 369  | 118.25 | 296  | 75.5   |   |
| 11443 | Tp53           | -1.57 | 429  | 66.73  | 398  | 42.6   |   |
| 11444 | Appbp2         | -1.57 | 936  | 48.49  | 801  | 30.95  |   |
| 11445 | Emc4           | -1.57 | 129  | 31.3   | 101  | 19.97  |   |
| 11446 | Rara           | -1.57 | 191  | 17.18  | 158  | 10.97  |   |
| 11447 | Yif1a          | -1.57 | 89   | 18.87  | 75   | 12.04  |   |
| 11448 | Psmb6          | -1.57 | 14   | 72.21  | 7    | 46.06  |   |
| 11449 | Fam35a         | -1.57 | 54   | 3.64   | 67   | 2.32   |   |
| 11450 | Plxdc1         | -1.57 | 44   | 4.28   | 35   | 2.73   |   |
| 11451 | Eno1           | -1.57 | 330  | 275.91 | 335  | 175.93 |   |
| 11452 | Ormdl3         | -1.57 | 172  | 108.69 | 156  | 69.29  |   |
| 11453 | Gnb2           | -1.57 | 915  | 197.98 | 790  | 126.18 |   |
| 11454 | Cdc25c         | -1.57 | 88   | 6.67   | 77   | 4.25   |   |
| 11455 | Slc25a5        | -1.57 | 277  | 100.17 | 241  | 63.84  |   |
| 11456 | Tdp2           | -1.57 | 79   | 9.82   | 92   | 6.26   |   |
| 11457 | Wdr41          | -1.57 | 62   | 6.34   | 69   | 4.03   |   |
| 11458 | Rsl24d1        | -1.57 | 139  | 32.48  | 119  | 20.68  |   |
| 11459 | Nelfa          | -1.57 | 194  | 25.68  | 165  | 16.35  |   |
| 11460 | Pias3          | -1.57 | 169  | 18.9   | 142  | 12.03  |   |
| 11461 | Clptm1         | -1.57 | 737  | 102.23 | 635  | 65.08  |   |
| 11462 | Alg2           | -1.57 | 148  | 17.73  | 126  | 11.28  |   |
| 11463 | Gata4          | -1.57 | 1370 | 112.88 | 1148 | 71.81  |   |
| 11464 | Dda1           | -1.57 | 106  | 20.48  | 91   | 13.01  |   |
| 11465 | Mgll           | -1.57 | 52   | 5.36   | 41   | 3.4    |   |
| 11466 | Tet1           | -1.57 | 65   | 2.37   | 64   | 1.51   |   |
| 11467 | Cisd3          | -1.57 | 22   | 7.37   | 18   | 4.68   |   |
| 11468 | Pex11a         | -1.57 | 29   | 3.13   | 26   | 1.99   |   |
| 11469 | Unc93b1        | -1.57 | 31   | 8.41   | 23   | 5.34   |   |
| 11470 | Giot1          | -1.57 | 34   | 7.38   | 34   | 4.69   |   |
| 11471 | Copz1          | -1.57 | 510  | 74.12  | 435  | 47.08  |   |
| 11472 | Pfas           | -1.57 | 335  | 15.78  | 299  | 10.02  |   |
| 11473 | Trappc1        | -1.58 | 115  | 42.6   | 93   | 27.04  |   |
| 11474 | Dennd2c        | -1.58 | 47   | 2.24   | 42   | 1.42   |   |
| 11475 | Phyh           | -1.58 | 293  | 49.2   | 255  | 31.18  |   |
| 11476 | Ran            | -1.58 | 534  | 180.38 | 438  | 114.26 |   |
| 11477 | Arsb           | -1.58 | 270  | 21.33  | 239  | 13.51  |   |
| 11478 | Kdelr1         | -1.58 | 511  | 122.62 | 439  | 77.58  |   |
| 11479 | Lrp8           | -1.58 | 598  | 25.13  | 507  | 15.9   |   |
| 11480 | AABR07072266.1 | -1.58 | 0    | 7.54   | 0    | 4.77   |   |
| 11481 | Adgrg6         | -1.58 | 21   | 0.69   | 14   | 0.43   |   |
| 11482 | Enpp2          | -1.58 | 13   | 1.77   | 13   | 1.12   |   |
| 11483 | Hdhd3          | -1.58 | 13   | 3.99   | 11   | 2.52   |   |
| 11484 | Ppap2c         | -1.58 | 33   | 5.85   | 32   | 3.7    |   |
| 11485 | Wdr25          | -1.58 | 49   | 2.5    | 82   | 1.58   |   |
| 11486 | Akap7          | -1.58 | 38   | 4.44   | 58   | 2.81   |   |
| 11487 | Mettl10        | -1.58 | 65   | 8.78   | 68   | 5.56   |   |
| 11488 | Mrpl55         | -1.58 | 35   | 9.96   | 34   | 6.3    |   |
| 11489 | Mtfmt          | -1.58 | 43   | 6.67   | 55   | 4.22   |   |

Supplemental Table 3  
 FSH + Ad-E versus FSH + Ad-FOXO1(A3), 24 hours

|       | A              | B     | C   | D     | E   | F     | G |
|-------|----------------|-------|-----|-------|-----|-------|---|
| 11490 | Mytop          | -1.58 | 20  | 1.12  | 22  | 0.71  |   |
| 11491 | Oplah          | -1.58 | 65  | 4.39  | 38  | 2.78  |   |
| 11492 | Tmem164        | -1.58 | 330 | 16.22 | 283 | 10.25 |   |
| 11493 | Slc9a1         | -1.58 | 221 | 12.17 | 204 | 7.69  |   |
| 11494 | Vbp1           | -1.58 | 135 | 33.54 | 131 | 21.18 |   |
| 11495 | Eif3h_1        | -1.58 | 97  | 98.14 | 78  | 61.97 |   |
| 11496 | Mlf2           | -1.58 | 344 | 69.57 | 292 | 43.93 |   |
| 11497 | Rnf130         | -1.58 | 138 | 32.33 | 152 | 20.41 |   |
| 11498 | Sympk          | -1.59 | 301 | 23.57 | 269 | 14.87 |   |
| 11499 | AABR07035273.1 | -1.59 | 45  | 2.15  | 32  | 1.36  |   |
| 11500 | Uck1           | -1.59 | 169 | 28.93 | 165 | 18.24 |   |
| 11501 | RGD1311946     | -1.59 | 87  | 14.14 | 74  | 8.91  |   |
| 11502 | Thap11         | -1.59 | 70  | 13.94 | 59  | 8.78  |   |
| 11503 | Fst            | -1.59 | 146 | 41.96 | 128 | 26.43 |   |
| 11504 | Bub3           | -1.59 | 216 | 26.99 | 193 | 17    |   |
| 11505 | Engase         | -1.59 | 22  | 1.72  | 22  | 1.08  |   |
| 11506 | Polr3gl        | -1.59 | 36  | 3.24  | 42  | 2.04  |   |
| 11507 | Tdrkh          | -1.59 | 20  | 2.23  | 22  | 1.4   |   |
| 11508 | Trpt1          | -1.59 | 13  | 2.39  | 13  | 1.5   |   |
| 11509 | Gstz1          | -1.59 | 68  | 10.99 | 67  | 6.92  |   |
| 11510 | LOC691135      | -1.59 | 10  | 1.63  | 15  | 1.02  |   |
| 11511 | Ssr4           | -1.59 | 123 | 59.36 | 110 | 37.35 |   |
| 11512 | Mid1ip1        | -1.59 | 169 | 32.48 | 141 | 20.43 |   |
| 11513 | Gaa            | -1.59 | 480 | 48.68 | 413 | 30.61 |   |
| 11514 | Ahi1           | -1.59 | 115 | 10.14 | 90  | 6.38  |   |
| 11515 | Ano1           | -1.59 | 171 | 10.7  | 147 | 6.72  |   |
| 11516 | Ints1_2        | -1.59 | 7   | 9.84  | 3   | 6.18  |   |
| 11517 | Poldip2        | -1.59 | 167 | 36.15 | 142 | 22.72 |   |
| 11518 | Clcn5          | -1.59 | 38  | 3.07  | 55  | 1.93  |   |
| 11519 | Polr1c         | -1.59 | 135 | 34    | 116 | 21.35 |   |
| 11520 | Uap1           | -1.59 | 90  | 13.04 | 65  | 8.18  |   |
| 11521 | Psme2          | -1.59 | 22  | 52.23 | 25  | 32.77 |   |
| 11522 | Sesn2          | -1.59 | 68  | 6     | 67  | 3.76  |   |
| 11523 | Ehd3           | -1.59 | 34  | 4.32  | 32  | 2.71  |   |
| 11524 | Ttll12         | -1.6  | 178 | 25.07 | 165 | 15.71 |   |
| 11525 | Meaf6          | -1.6  | 56  | 11.4  | 70  | 7.14  |   |
| 11526 | Cdk1           | -1.6  | 88  | 20.53 | 73  | 12.85 |   |
| 11527 | Timm50         | -1.6  | 87  | 24.88 | 72  | 15.58 |   |
| 11528 | LOC367746      | -1.6  | 82  | 43.98 | 71  | 27.53 |   |
| 11529 | Sirt6          | -1.6  | 98  | 18.69 | 86  | 11.7  |   |
| 11530 | Samd10         | -1.6  | 51  | 8.68  | 43  | 5.43  |   |
| 11531 | Tssc1          | -1.6  | 75  | 12.64 | 71  | 7.91  |   |
| 11532 | Mrps34         | -1.6  | 67  | 26.92 | 56  | 16.82 |   |
| 11533 | Obsl1          | -1.6  | 663 | 39.03 | 558 | 24.33 |   |
| 11534 | AABR07057683.1 | -1.61 | 4   | 4.73  | 4   | 2.95  |   |
| 11535 | Cyp2j10        | -1.61 | 176 | 0.56  | 183 | 0.35  |   |
| 11536 | Ddr2           | -1.61 | 47  | 3.48  | 42  | 2.17  |   |
| 11537 | Dusp5          | -1.61 | 9   | 0.9   | 5   | 0.56  |   |
| 11538 | Efcc1          | -1.61 | 18  | 1.29  | 34  | 0.8   |   |
| 11539 | Enpep          | -1.61 | 12  | 0.57  | 6   | 0.36  |   |
| 11540 | Kcnq5          | -1.61 | 67  | 0.67  | 64  | 0.42  |   |
| 11541 | Knstrn         | -1.61 | 16  | 2.8   | 15  | 1.75  |   |
| 11542 | LOC100911746   | -1.61 | 1   | 4.52  | 0   | 2.82  |   |
| 11543 | Mtcp1_1        | -1.61 | 6   | 10.65 | 5   | 6.63  |   |

Supplemental Table 3  
 FSH + Ad-E versus FSH + Ad-FOXO1(A3), 24 hours

|       | A              | B     | C   | D      | E   | F      | G |
|-------|----------------|-------|-----|--------|-----|--------|---|
| 11544 | Pomt2          | -1.61 | 114 | 7.81   | 107 | 4.87   |   |
| 11545 | Rnft2          | -1.61 | 17  | 1.04   | 18  | 0.65   |   |
| 11546 | Rps17l         | -1.61 | 2   | 5.32   | 2   | 3.32   |   |
| 11547 | Sox11          | -1.61 | 6   | 1.08   | 5   | 0.67   |   |
| 11548 | Spa17          | -1.61 | 12  | 3.21   | 11  | 2      |   |
| 11549 | AABR07012583.3 | -1.61 | 15  | 6.14   | 25  | 3.82   |   |
| 11550 | Crtap          | -1.61 | 184 | 40.89  | 154 | 25.48  |   |
| 11551 | Dnajc19        | -1.61 | 45  | 1.84   | 50  | 1.15   |   |
| 11552 | Fkbp1b         | -1.61 | 9   | 1.94   | 10  | 1.21   |   |
| 11553 | Frem2          | -1.61 | 10  | 0.22   | 6   | 0.14   |   |
| 11554 | Gmn            | -1.61 | 20  | 5.53   | 19  | 3.45   |   |
| 11555 | Hist1h1c       | -1.61 | 28  | 17     | 24  | 10.59  |   |
| 11556 | Hoga1          | -1.61 | 21  | 2.45   | 17  | 1.53   |   |
| 11557 | Layn           | -1.61 | 11  | 0.55   | 5   | 0.34   |   |
| 11558 | LOC100362027   | -1.61 | 34  | 113.1  | 48  | 70.46  |   |
| 11559 | LOC100909771   | -1.61 | 1   | 3.41   | 0   | 2.13   |   |
| 11560 | LOC103690015   | -1.61 | 0   | 4.76   | 0   | 2.97   |   |
| 11561 | LOC498122      | -1.61 | 27  | 6.1    | 23  | 3.8    |   |
| 11562 | LOC683884      | -1.61 | 70  | 5.09   | 83  | 3.17   |   |
| 11563 | Med27          | -1.61 | 149 | 19.09  | 165 | 11.89  |   |
| 11564 | Mrpl54         | -1.61 | 19  | 10.67  | 15  | 6.65   |   |
| 11565 | Nudt16         | -1.61 | 13  | 2.75   | 15  | 1.72   |   |
| 11566 | Prr7           | -1.61 | 6   | 2.24   | 5   | 1.4    |   |
| 11567 | Scube2         | -1.61 | 10  | 0.7    | 13  | 0.43   |   |
| 11568 | Smpd5          | -1.61 | 5   | 1.19   | 4   | 0.74   |   |
| 11569 | St14           | -1.61 | 7   | 0.68   | 6   | 0.42   |   |
| 11570 | Tmem198        | -1.61 | 19  | 2.73   | 16  | 1.7    |   |
| 11571 | Tmem8b         | -1.61 | 58  | 9.19   | 66  | 5.72   |   |
| 11572 | Traf3ip2       | -1.61 | 22  | 2.12   | 32  | 1.32   |   |
| 11573 | Bckdk          | -1.61 | 222 | 31.73  | 176 | 19.75  |   |
| 11574 | Trmt1          | -1.61 | 188 | 28.03  | 158 | 17.44  |   |
| 11575 | Tmem120a       | -1.61 | 128 | 23.52  | 98  | 14.62  |   |
| 11576 | Btbd2          | -1.61 | 120 | 22.81  | 123 | 14.18  |   |
| 11577 | Gata6          | -1.61 | 530 | 70.64  | 494 | 43.9   |   |
| 11578 | AC096370.2     | -1.61 | 0   | 8.87   | 0   | 5.51   |   |
| 11579 | Mcm3           | -1.61 | 165 | 19.76  | 141 | 12.28  |   |
| 11580 | Ddx56          | -1.61 | 53  | 12.13  | 35  | 7.54   |   |
| 11581 | Ercc1          | -1.61 | 78  | 24.05  | 65  | 14.94  |   |
| 11582 | Pigo           | -1.61 | 68  | 7.13   | 57  | 4.43   |   |
| 11583 | Ldha           | -1.61 | 700 | 265.67 | 495 | 164.95 |   |
| 11584 | AC117925.8     | -1.61 | 0   | 11.88  | 0   | 7.37   |   |
| 11585 | Fzd2           | -1.61 | 139 | 26.71  | 117 | 16.57  |   |
| 11586 | Anp32e         | -1.61 | 391 | 42.91  | 350 | 26.62  |   |
| 11587 | Hunk           | -1.61 | 61  | 6.92   | 79  | 4.29   |   |
| 11588 | Mettl22        | -1.61 | 59  | 10.87  | 61  | 6.74   |   |
| 11589 | Rce1           | -1.61 | 43  | 10.5   | 43  | 6.51   |   |
| 11590 | Spryd4         | -1.61 | 43  | 10.04  | 34  | 6.23   |   |
| 11591 | Tuba1b         | -1.61 | 881 | 889.41 | 645 | 550.98 |   |
| 11592 | Trmu           | -1.61 | 55  | 7.74   | 61  | 4.79   |   |
| 11593 | Mrps24         | -1.61 | 36  | 14.45  | 37  | 8.95   |   |
| 11594 | Neurl4         | -1.61 | 207 | 13.81  | 181 | 8.55   |   |
| 11595 | Zfp521         | -1.62 | 390 | 11.55  | 379 | 7.15   |   |
| 11596 | Atp9a          | -1.62 | 215 | 31.22  | 194 | 19.32  |   |
| 11597 | Neu1           | -1.62 | 121 | 17.62  | 97  | 10.9   |   |

Supplemental Table 3  
 FSH + Ad-E versus FSH + Ad-FOXO1(A3), 24 hours

|       | A              | B     | C     | D      | E    | F      | G |
|-------|----------------|-------|-------|--------|------|--------|---|
| 11598 | Tmed4          | -1.62 | 110   | 52.76  | 51   | 32.65  |   |
| 11599 | Slc11a2        | -1.62 | 175   | 11.15  | 159  | 6.89   |   |
| 11600 | Mks1           | -1.62 | 57    | 7.64   | 51   | 4.72   |   |
| 11601 | Tor1aip2_1     | -1.62 | 16    | 11.56  | 17   | 7.14   |   |
| 11602 | Esco2          | -1.62 | 17    | 2.41   | 19   | 1.49   |   |
| 11603 | Grid1          | -1.62 | 41    | 3.02   | 37   | 1.87   |   |
| 11604 | Gstm7          | -1.62 | 266   | 33.44  | 250  | 20.66  |   |
| 11605 | Map1lc3a       | -1.62 | 221   | 81.46  | 181  | 50.28  |   |
| 11606 | Atxn7l2        | -1.62 | 50    | 6.02   | 38   | 3.71   |   |
| 11607 | Sept9          | -1.62 | 582   | 46.19  | 409  | 28.49  |   |
| 11608 | Aldoa          | -1.62 | 2382  | 548.95 | 2008 | 338.45 |   |
| 11609 | Zfp52          | -1.62 | 106   | 7.91   | 94   | 4.87   |   |
| 11610 | Sirt2          | -1.62 | 210   | 28.69  | 197  | 17.69  |   |
| 11611 | Pim3           | -1.62 | 247   | 51.57  | 206  | 31.79  |   |
| 11612 | Hexdc          | -1.62 | 121   | 14.75  | 122  | 9.09   |   |
| 11613 | Yeats4         | -1.62 | 89    | 20.45  | 73   | 12.6   |   |
| 11614 | Fgfr2          | -1.62 | 551   | 32.7   | 483  | 20.14  |   |
| 11615 | Rn60_20_0056.5 | -1.62 | 17    | 11.66  | 14   | 7.18   |   |
| 11616 | Tpd52l1        | -1.62 | 79    | 4.63   | 90   | 2.85   |   |
| 11617 | Fzd5           | -1.62 | 16    | 2.86   | 14   | 1.76   |   |
| 11618 | Heatr9         | -1.62 | 20    | 3.31   | 15   | 2.04   |   |
| 11619 | Orc6           | -1.62 | 23    | 4.07   | 24   | 2.51   |   |
| 11620 | Spata2         | -1.62 | 77    | 10.31  | 66   | 6.35   |   |
| 11621 | Adamts7        | -1.63 | 150   | 8.35   | 128  | 5.13   |   |
| 11622 | Wnt4           | -1.63 | 292   | 16.79  | 241  | 10.32  |   |
| 11623 | Bcl7c          | -1.63 | 48    | 16.52  | 42   | 10.16  |   |
| 11624 | LOC102723236_2 | -1.63 | 0     | 88.1   | 1    | 54.14  |   |
| 11625 | Spcs1          | -1.63 | 103   | 41.75  | 88   | 25.65  |   |
| 11626 | Hpcal1         | -1.63 | 182   | 27.97  | 189  | 17.18  |   |
| 11627 | Crif3          | -1.63 | 48    | 8.43   | 48   | 5.18   |   |
| 11628 | Pttg1          | -1.63 | 29    | 9.71   | 26   | 5.96   |   |
| 11629 | Adgrf5         | -1.63 | 123   | 4.73   | 100  | 2.91   |   |
| 11630 | Coq3           | -1.63 | 39    | 7.77   | 44   | 4.77   |   |
| 11631 | Atp6v0c        | -1.63 | 571   | 172.07 | 498  | 105.6  |   |
| 11632 | Rfng           | -1.63 | 53    | 8.55   | 39   | 5.25   |   |
| 11633 | AABR07066529.1 | -1.63 | 38    | 6.84   | 33   | 4.2    |   |
| 11634 | Gde1           | -1.63 | 176   | 40.78  | 145  | 25.02  |   |
| 11635 | Lsm1           | -1.63 | 53    | 11.61  | 44   | 7.12   |   |
| 11636 | Dhodh          | -1.63 | 161   | 11.59  | 118  | 7.11   |   |
| 11637 | Adck3          | -1.63 | 131   | 15.57  | 107  | 9.54   |   |
| 11638 | Rps4x          | -1.63 | 0     | 76.36  | 0    | 46.79  |   |
| 11639 | Rdm1           | -1.63 | 20    | 2.09   | 11   | 1.28   |   |
| 11640 | Dck            | -1.63 | 14    | 3.41   | 15   | 2.08   |   |
| 11641 | Klhl36         | -1.63 | 20    | 1.54   | 19   | 0.94   |   |
| 11642 | Lrfn1          | -1.63 | 25    | 3.04   | 27   | 1.86   |   |
| 11643 | Slc46a3        | -1.63 | 12    | 1.65   | 14   | 1.01   |   |
| 11644 | Abhd10_1       | -1.63 | 0     | 2.97   | 0    | 1.82   |   |
| 11645 | Alg11          | -1.63 | 91    | 18.42  | 83   | 11.27  |   |
| 11646 | Cacna2d2       | -1.63 | 22    | 0.84   | 17   | 0.51   |   |
| 11647 | Haus4          | -1.63 | 11    | 2.57   | 11   | 1.57   |   |
| 11648 | Med11          | -1.63 | 11    | 4.4    | 10   | 2.69   |   |
| 11649 | Mospd1         | -1.63 | 19    | 6.2    | 26   | 3.79   |   |
| 11650 | Nle1           | -1.63 | 40    | 6.83   | 33   | 4.18   |   |
| 11651 | Scd2           | -1.64 | 10466 | 770.06 | 8605 | 470.63 |   |



Supplemental Table 3  
 FSH + Ad-E versus FSH + Ad-FOXO1(A3), 24 hours

|       | A              | B     | C    | D      | E    | F      | G |
|-------|----------------|-------|------|--------|------|--------|---|
| 11652 | Wdr11          | -1.64 | 203  | 14.33  | 177  | 8.75   |   |
| 11653 | Ficd           | -1.64 | 111  | 12.39  | 90   | 7.56   |   |
| 11654 | Cdip1          | -1.64 | 309  | 27.52  | 314  | 16.79  |   |
| 11655 | Slc46a1        | -1.64 | 61   | 7.78   | 58   | 4.75   |   |
| 11656 | Get4           | -1.64 | 167  | 25.45  | 144  | 15.53  |   |
| 11657 | P3h1           | -1.64 | 525  | 70.85  | 449  | 43.23  |   |
| 11658 | Dctd           | -1.64 | 53   | 5.53   | 52   | 3.37   |   |
| 11659 | Tm7sf2         | -1.64 | 115  | 21.5   | 95   | 13.1   |   |
| 11660 | LOC103692171   | -1.64 | 1    | 18.1   | 0    | 11.02  |   |
| 11661 | Slc17a9        | -1.64 | 34   | 4.3    | 28   | 2.62   |   |
| 11662 | RGD1561113     | -1.64 | 57   | 116.38 | 49   | 70.9   |   |
| 11663 | Peg3           | -1.64 | 192  | 9.49   | 153  | 5.78   |   |
| 11664 | RGD1306151     | -1.64 | 101  | 8.43   | 87   | 5.13   |   |
| 11665 | Tmem109        | -1.64 | 151  | 26.82  | 123  | 16.33  |   |
| 11666 | Ctnnbip1       | -1.64 | 109  | 9.98   | 99   | 6.07   |   |
| 11667 | Creg1          | -1.64 | 2710 | 461.14 | 2248 | 280.72 |   |
| 11668 | Dpm2           | -1.64 | 46   | 19.13  | 38   | 11.64  |   |
| 11669 | AABR07042821.1 | -1.64 | 23   | 56.51  | 17   | 34.37  |   |
| 11670 | Oas1a          | -1.64 | 100  | 21.03  | 75   | 12.79  |   |
| 11671 | Prkaca         | -1.64 | 377  | 57.74  | 314  | 35.12  |   |
| 11672 | Psmc3          | -1.64 | 410  | 69.65  | 350  | 42.36  |   |
| 11673 | St6galnac6     | -1.65 | 148  | 20.97  | 135  | 12.75  |   |
| 11674 | Apeh           | -1.65 | 217  | 25.89  | 174  | 15.73  |   |
| 11675 | B4galt3        | -1.65 | 193  | 31.7   | 161  | 19.26  |   |
| 11676 | Rnf152         | -1.65 | 40   | 2.11   | 31   | 1.28   |   |
| 11677 | Ppp5c          | -1.65 | 157  | 23.44  | 139  | 14.23  |   |
| 11678 | Fam69b         | -1.65 | 58   | 8.66   | 50   | 5.25   |   |
| 11679 | Slc26a7        | -1.65 | 267  | 13.42  | 202  | 8.14   |   |
| 11680 | Lhpp           | -1.65 | 65   | 8.17   | 62   | 4.95   |   |
| 11681 | Aurka          | -1.65 | 38   | 5.68   | 39   | 3.44   |   |
| 11682 | Mark1          | -1.65 | 1319 | 71.73  | 1227 | 43.46  |   |
| 11683 | Desi2          | -1.65 | 75   | 9.23   | 85   | 5.59   |   |
| 11684 | Armc10         | -1.65 | 154  | 25.71  | 156  | 15.58  |   |
| 11685 | Cnpy3          | -1.65 | 125  | 24.16  | 102  | 14.63  |   |
| 11686 | Ano8           | -1.65 | 155  | 17.85  | 148  | 10.81  |   |
| 11687 | Frmc4a         | -1.65 | 27   | 3.1    | 24   | 1.87   |   |
| 11688 | Fitm2          | -1.65 | 67   | 5.52   | 54   | 3.34   |   |
| 11689 | Parm1          | -1.65 | 71   | 5.03   | 67   | 3.04   |   |
| 11690 | Gpam           | -1.65 | 668  | 71.35  | 531  | 43.13  |   |
| 11691 | Entpd6         | -1.65 | 56   | 6.81   | 43   | 4.12   |   |
| 11692 | LOC102551660   | -1.65 | 99   | 11.08  | 94   | 6.7    |   |
| 11693 | Grc10          | -1.65 | 42   | 57.24  | 31   | 34.59  |   |
| 11694 | Zcchc4         | -1.66 | 48   | 3.81   | 58   | 2.3    |   |
| 11695 | Adarb1         | -1.66 | 73   | 2.82   | 53   | 1.7    |   |
| 11696 | Rab3d          | -1.66 | 83   | 7.97   | 71   | 4.81   |   |
| 11697 | Higd2a         | -1.66 | 74   | 49.59  | 50   | 29.93  |   |
| 11698 | Pddc1          | -1.66 | 22   | 21.24  | 30   | 12.81  |   |
| 11699 | Hmgcs2         | -1.66 | 3312 | 552.64 | 2788 | 333.25 |   |
| 11700 | Ak1            | -1.66 | 113  | 18.44  | 81   | 11.12  |   |
| 11701 | Camkk2         | -1.66 | 62   | 5.25   | 78   | 3.17   |   |
| 11702 | Nhp2l1         | -1.66 | 7    | 18.64  | 7    | 11.24  |   |
| 11703 | AC106663.1     | -1.66 | 0    | 4.06   | 0    | 2.45   |   |
| 11704 | Rabggta        | -1.66 | 105  | 12.93  | 88   | 7.79   |   |
| 11705 | Pycrl          | -1.66 | 70   | 16.54  | 58   | 9.96   |   |

Supplemental Table 3  
 FSH + Ad-E versus FSH + Ad-FOXO1(A3), 24 hours

|       | A              | B     | C   | D      | E   | F     | G |
|-------|----------------|-------|-----|--------|-----|-------|---|
| 11706 | Hba1           | -1.66 | 25  | 23.44  | 17  | 14.12 |   |
| 11707 | Ilvbl          | -1.66 | 167 | 20.5   | 141 | 12.34 |   |
| 11708 | Mpnd           | -1.66 | 159 | 26.48  | 137 | 15.94 |   |
| 11709 | C1qtnf1        | -1.66 | 80  | 7.53   | 65  | 4.53  |   |
| 11710 | Nudt21         | -1.66 | 199 | 36.02  | 193 | 21.68 |   |
| 11711 | Ifitm3         | -1.66 | 116 | 63.62  | 97  | 38.28 |   |
| 11712 | Sgsm3          | -1.66 | 48  | 5.23   | 39  | 3.15  |   |
| 11713 | Ddost          | -1.66 | 537 | 108.58 | 429 | 65.31 |   |
| 11714 | Dhx35          | -1.66 | 66  | 3.41   | 68  | 2.05  |   |
| 11715 | Twf2           | -1.66 | 58  | 11.67  | 43  | 7.02  |   |
| 11716 | Dhrs7b         | -1.66 | 99  | 15.09  | 95  | 9.06  |   |
| 11717 | Nphp1          | -1.66 | 86  | 6.46   | 88  | 3.88  |   |
| 11718 | Cpt1c          | -1.67 | 78  | 8.09   | 68  | 4.86  |   |
| 11719 | Slc35f6        | -1.67 | 144 | 16.64  | 118 | 9.99  |   |
| 11720 | Madd           | -1.67 | 179 | 9.72   | 140 | 5.83  |   |
| 11721 | Lpcat3         | -1.67 | 761 | 121.39 | 694 | 72.83 |   |
| 11722 | Usp21          | -1.67 | 170 | 25.48  | 144 | 15.26 |   |
| 11723 | Nt5c           | -1.67 | 23  | 9.26   | 19  | 5.54  |   |
| 11724 | Zfp112         | -1.67 | 11  | 1.1    | 8   | 0.66  |   |
| 11725 | AABR07031674.3 | -1.67 | 0   | 5.92   | 0   | 3.54  |   |
| 11726 | Adh6           | -1.67 | 8   | 0.57   | 7   | 0.34  |   |
| 11727 | Atg4a          | -1.67 | 16  | 2.95   | 18  | 1.76  |   |
| 11728 | Bid            | -1.67 | 24  | 2.73   | 31  | 1.63  |   |
| 11729 | Chrnbl         | -1.67 | 5   | 0.8    | 11  | 0.48  |   |
| 11730 | Drg2           | -1.67 | 84  | 21.49  | 77  | 12.85 |   |
| 11731 | Duoxa1         | -1.67 | 5   | 1.09   | 5   | 0.65  |   |
| 11732 | Eno3           | -1.67 | 7   | 1.27   | 7   | 0.76  |   |
| 11733 | Ggct           | -1.67 | 10  | 2.08   | 12  | 1.25  |   |
| 11734 | Hes1           | -1.67 | 25  | 6.27   | 20  | 3.75  |   |
| 11735 | Jmjd4          | -1.67 | 15  | 3.02   | 16  | 1.8   |   |
| 11736 | LOC303566      | -1.67 | 5   | 0.66   | 4   | 0.4   |   |
| 11737 | LOC500877      | -1.67 | 280 | 3.39   | 279 | 2.03  |   |
| 11738 | LOC688684      | -1.67 | 0   | 4.71   | 0   | 2.82  |   |
| 11739 | LOC689899      | -1.67 | 0   | 3.41   | 0   | 2.04  |   |
| 11740 | Mcu            | -1.67 | 62  | 4.65   | 76  | 2.78  |   |
| 11741 | Nr4a3          | -1.67 | 6   | 0.41   | 6   | 0.25  |   |
| 11742 | Pars2          | -1.67 | 31  | 3.3    | 24  | 1.98  |   |
| 11743 | Pde12          | -1.67 | 45  | 3.72   | 61  | 2.23  |   |
| 11744 | Pigy           | -1.67 | 24  | 4.84   | 22  | 2.89  |   |
| 11745 | Qpct           | -1.67 | 16  | 3.56   | 13  | 2.13  |   |
| 11746 | RGD1309594     | -1.67 | 24  | 4.05   | 21  | 2.43  |   |
| 11747 | RGD1562758     | -1.67 | 2   | 3.61   | 1   | 2.16  |   |
| 11748 | Rrm2           | -1.67 | 8   | 3.09   | 4   | 1.85  |   |
| 11749 | S1pr3          | -1.67 | 40  | 3.92   | 35  | 2.34  |   |
| 11750 | Scnn1a         | -1.67 | 6   | 0.54   | 6   | 0.32  |   |
| 11751 | SNORD58_1      | -1.67 | 5   | 27.43  | 4   | 16.41 |   |
| 11752 | Tmem38a        | -1.67 | 35  | 5.02   | 30  | 3     |   |
| 11753 | Tmem63a        | -1.67 | 16  | 1.48   | 12  | 0.88  |   |
| 11754 | Ttc30b         | -1.67 | 18  | 3.52   | 15  | 2.11  |   |
| 11755 | Uba7           | -1.67 | 10  | 0.41   | 6   | 0.25  |   |
| 11756 | Usp35          | -1.67 | 23  | 1.8    | 32  | 1.07  |   |
| 11757 | A2m            | -1.67 | 1   | 0.4    | 0   | 0.24  |   |
| 11758 | AABR07037943.1 | -1.67 | 9   | 0.73   | 5   | 0.43  |   |
| 11759 | AABR07043190.1 | -1.67 | 3   | 1.96   | 3   | 1.17  |   |

Supplemental Table 3  
 FSH + Ad-E versus FSH + Ad-FOXO1(A3), 24 hours

|       | A           | B     | C    | D      | E    | F      | G |
|-------|-------------|-------|------|--------|------|--------|---|
| 11760 | Ap3m2       | -1.67 | 9    | 1.45   | 12   | 0.87   |   |
| 11761 | AY172581.14 | -1.67 | 5    | 24.14  | 4    | 14.44  |   |
| 11762 | Car12       | -1.67 | 7    | 0.7    | 8    | 0.42   |   |
| 11763 | Car6        | -1.67 | 7    | 1.32   | 4    | 0.79   |   |
| 11764 | Chchd7      | -1.67 | 5    | 7.02   | 8    | 4.2    |   |
| 11765 | Depdc1      | -1.67 | 10   | 1.1    | 11   | 0.66   |   |
| 11766 | Erich1      | -1.67 | 30   | 5.14   | 29   | 3.08   |   |
| 11767 | Fndc8       | -1.67 | 7    | 0.78   | 5    | 0.47   |   |
| 11768 | Hyal1       | -1.67 | 5    | 1.08   | 4    | 0.65   |   |
| 11769 | Intu        | -1.67 | 13   | 0.64   | 15   | 0.38   |   |
| 11770 | L3mbtl4     | -1.67 | 84   | 1.04   | 82   | 0.62   |   |
| 11771 | Lins        | -1.67 | 48   | 5.45   | 45   | 3.26   |   |
| 11772 | Lrrc3       | -1.67 | 5    | 1.9    | 4    | 1.14   |   |
| 11773 | Nudt7       | -1.67 | 97   | 5.1    | 83   | 3.05   |   |
| 11774 | Qtrt1       | -1.67 | 13   | 1.89   | 10   | 1.13   |   |
| 11775 | Scamp5      | -1.67 | 30   | 3.11   | 32   | 1.86   |   |
| 11776 | SNORA44_3   | -1.67 | 0    | 14.03  | 0    | 8.39   |   |
| 11777 | Suox        | -1.67 | 70   | 11.56  | 58   | 6.92   |   |
| 11778 | Tmc7        | -1.67 | 11   | 0.41   | 4    | 0.24   |   |
| 11779 | Sik1        | -1.67 | 623  | 44.6   | 518  | 26.67  |   |
| 11780 | Prss35      | -1.67 | 1524 | 174.55 | 1224 | 104.26 |   |
| 11781 | Rbm42       | -1.67 | 187  | 36.27  | 159  | 21.66  |   |
| 11782 | Gclc        | -1.67 | 187  | 18.91  | 165  | 11.29  |   |
| 11783 | Ttc5        | -1.67 | 193  | 29.06  | 174  | 17.35  |   |
| 11784 | Triobp      | -1.68 | 104  | 5.54   | 84   | 3.3    |   |
| 11785 | Wdr83os     | -1.68 | 87   | 44.01  | 72   | 26.25  |   |
| 11786 | Bcat2       | -1.68 | 179  | 37.61  | 161  | 22.42  |   |
| 11787 | Pnpla6      | -1.68 | 199  | 13.33  | 167  | 7.95   |   |
| 11788 | Best1       | -1.68 | 50   | 5.95   | 41   | 3.55   |   |
| 11789 | Slc37a4     | -1.68 | 87   | 11.66  | 78   | 6.95   |   |
| 11790 | Rfxank      | -1.68 | 42   | 13.05  | 45   | 7.76   |   |
| 11791 | Anapc11     | -1.68 | 108  | 10.24  | 115  | 6.09   |   |
| 11792 | Ift122      | -1.68 | 122  | 7.67   | 123  | 4.56   |   |
| 11793 | Arv1        | -1.68 | 91   | 11.3   | 108  | 6.72   |   |
| 11794 | Gys1        | -1.68 | 187  | 17.26  | 159  | 10.27  |   |
| 11795 | Sdhaf1      | -1.68 | 73   | 33.61  | 57   | 19.99  |   |
| 11796 | Anapc16     | -1.68 | 87   | 13.64  | 78   | 8.11   |   |
| 11797 | Emc6        | -1.68 | 44   | 12.58  | 35   | 7.48   |   |
| 11798 | Sreb1       | -1.68 | 399  | 31.51  | 326  | 18.74  |   |
| 11799 | Tmem50b     | -1.68 | 193  | 25.75  | 181  | 15.3   |   |
| 11800 | Wdr92       | -1.68 | 30   | 5.98   | 21   | 3.55   |   |
| 11801 | Eml1        | -1.68 | 55   | 5.14   | 41   | 3.05   |   |
| 11802 | Ncaph       | -1.68 | 49   | 4.32   | 36   | 2.57   |   |
| 11803 | Sema6d      | -1.68 | 37   | 1.99   | 30   | 1.18   |   |
| 11804 | Stk17b      | -1.69 | 104  | 10.2   | 82   | 6.05   |   |
| 11805 | Pde4b       | -1.69 | 37   | 3.19   | 42   | 1.89   |   |
| 11806 | Socs2       | -1.69 | 244  | 36.95  | 227  | 21.91  |   |
| 11807 | Abcd1       | -1.69 | 65   | 4.21   | 59   | 2.5    |   |
| 11808 | Rps6ka5     | -1.69 | 237  | 8.4    | 182  | 4.98   |   |
| 11809 | Exosc1      | -1.69 | 49   | 14.78  | 56   | 8.75   |   |
| 11810 | Ifnlr1      | -1.69 | 31   | 2.2    | 25   | 1.3    |   |
| 11811 | Mrpl53_2    | -1.69 | 4    | 14.15  | 8    | 8.38   |   |
| 11812 | Wdr12       | -1.69 | 62   | 12.26  | 65   | 7.26   |   |
| 11813 | Polr2e      | -1.69 | 144  | 46.51  | 125  | 27.52  |   |

Supplemental Table 3  
 FSH + Ad-E versus FSH + Ad-FOXO1(A3), 24 hours

|       | A          | B     | C    | D       | E    | F      | G |
|-------|------------|-------|------|---------|------|--------|---|
| 11814 | Rpl27      | -1.69 | 388  | 346.1   | 279  | 204.72 |   |
| 11815 | Lage3      | -1.69 | 66   | 32.65   | 57   | 19.31  |   |
| 11816 | Endod1     | -1.69 | 109  | 27.79   | 86   | 16.43  |   |
| 11817 | Ext1       | -1.69 | 1144 | 82.65   | 1090 | 48.85  |   |
| 11818 | Htra3      | -1.69 | 228  | 31.76   | 195  | 18.75  |   |
| 11819 | RGD1563941 | -1.69 | 19   | 4.51    | 15   | 2.66   |   |
| 11820 | Gstk1      | -1.69 | 41   | 14.39   | 32   | 8.49   |   |
| 11821 | Mettl25    | -1.69 | 48   | 3.03    | 67   | 1.79   |   |
| 11822 | Mgmt       | -1.69 | 80   | 16.68   | 83   | 9.84   |   |
| 11823 | Smpd13b    | -1.69 | 58   | 8.39    | 40   | 4.95   |   |
| 11824 | P3h3       | -1.7  | 309  | 44.01   | 263  | 25.95  |   |
| 11825 | Acot8      | -1.7  | 17   | 7.39    | 16   | 4.36   |   |
| 11826 | Akt2       | -1.7  | 388  | 61.14   | 353  | 36.02  |   |
| 11827 | Phyhipl    | -1.7  | 65   | 7.37    | 86   | 4.34   |   |
| 11828 | Pef1       | -1.7  | 123  | 24.35   | 113  | 14.34  |   |
| 11829 | Mrps17     | -1.7  | 84   | 22.21   | 65   | 13.08  |   |
| 11830 | Glis2      | -1.7  | 129  | 13.69   | 113  | 8.06   |   |
| 11831 | Slc35b2    | -1.7  | 176  | 34.02   | 146  | 20.02  |   |
| 11832 | Irf1       | -1.7  | 152  | 26.53   | 123  | 15.6   |   |
| 11833 | Fam84b     | -1.7  | 89   | 34.54   | 70   | 20.31  |   |
| 11834 | Ccnl1      | -1.7  | 541  | 43.32   | 415  | 25.46  |   |
| 11835 | Ccdc170    | -1.7  | 13   | 2.39    | 17   | 1.4    |   |
| 11836 | Cenpt      | -1.7  | 14   | 2.24    | 15   | 1.32   |   |
| 11837 | Chst10     | -1.7  | 35   | 3.7     | 27   | 2.18   |   |
| 11838 | Dnajc30    | -1.7  | 14   | 4.75    | 11   | 2.79   |   |
| 11839 | Itm2a      | -1.7  | 15   | 3.14    | 12   | 1.85   |   |
| 11840 | Mrps15     | -1.7  | 51   | 6.91    | 43   | 4.06   |   |
| 11841 | Pole2      | -1.7  | 21   | 2.99    | 19   | 1.76   |   |
| 11842 | Qrsl1      | -1.7  | 31   | 2.48    | 28   | 1.46   |   |
| 11843 | RGD1560065 | -1.7  | 46   | 8.92    | 38   | 5.24   |   |
| 11844 | Impdh1     | -1.7  | 271  | 33.86   | 216  | 19.87  |   |
| 11845 | AY172581.2 | -1.71 | 51   | 271.55  | 40   | 159.23 |   |
| 11846 | Suds3      | -1.71 | 282  | 34.05   | 264  | 19.97  |   |
| 11847 | Mrpl15     | -1.71 | 66   | 8.27    | 62   | 4.85   |   |
| 11848 | Rpl18a     | -1.71 | 2706 | 1504.06 | 2143 | 880.77 |   |
| 11849 | Abcc3      | -1.71 | 227  | 11.13   | 215  | 6.51   |   |
| 11850 | Mrp63      | -1.71 | 23   | 5.05    | 18   | 2.95   |   |
| 11851 | Mrps16     | -1.71 | 47   | 27.44   | 41   | 16.05  |   |
| 11852 | Ncald      | -1.71 | 41   | 2.47    | 42   | 1.45   |   |
| 11853 | Phyhip_1   | -1.71 | 0    | 2.65    | 1    | 1.55   |   |
| 11854 | Scrn2      | -1.71 | 25   | 5.58    | 28   | 3.26   |   |
| 11855 | Gbas       | -1.71 | 135  | 34.73   | 127  | 20.32  |   |
| 11856 | Ppcs       | -1.71 | 26   | 4.83    | 22   | 2.82   |   |
| 11857 | Tctn1      | -1.71 | 96   | 9       | 70   | 5.27   |   |
| 11858 | Slc35a1    | -1.71 | 42   | 9.32    | 33   | 5.45   |   |
| 11859 | Chchd4_2   | -1.71 | 24   | 8.63    | 19   | 5.04   |   |
| 11860 | LOC501189  | -1.71 | 75   | 7.24    | 74   | 4.23   |   |
| 11861 | RGD1310852 | -1.71 | 43   | 2.66    | 34   | 1.56   |   |
| 11862 | Abhd13     | -1.71 | 205  | 13.2    | 164  | 7.71   |   |
| 11863 | Plau       | -1.71 | 131  | 24.72   | 102  | 14.44  |   |
| 11864 | Atp13a1    | -1.71 | 352  | 29.88   | 288  | 17.45  |   |
| 11865 | Azin2      | -1.71 | 126  | 13.07   | 139  | 7.63   |   |
| 11866 | Cand2      | -1.71 | 81   | 5.94    | 70   | 3.47   |   |
| 11867 | Abca2      | -1.72 | 647  | 28.62   | 504  | 16.68  |   |

Supplemental Table 3  
 FSH + Ad-E versus FSH + Ad-FOXO1(A3), 24 hours

|       | A              | B     | C    | D      | E    | F      | G |
|-------|----------------|-------|------|--------|------|--------|---|
| 11868 | Pip4k2b        | -1.72 | 65   | 10.77  | 70   | 6.28   |   |
| 11869 | Tmem110        | -1.72 | 85   | 13.3   | 78   | 7.75   |   |
| 11870 | Col18a1        | -1.72 | 135  | 9.18   | 106  | 5.35   |   |
| 11871 | Cpsf4          | -1.72 | 63   | 14.34  | 78   | 8.36   |   |
| 11872 | Txn1           | -1.72 | 240  | 259.77 | 212  | 151.24 |   |
| 11873 | Rpl19          | -1.72 | 903  | 555.21 | 585  | 323.06 |   |
| 11874 | Por            | -1.72 | 269  | 35.49  | 219  | 20.65  |   |
| 11875 | Hspb11         | -1.72 | 20   | 2.62   | 18   | 1.53   |   |
| 11876 | Mbd4           | -1.72 | 26   | 3.83   | 34   | 2.23   |   |
| 11877 | Snrpd1         | -1.72 | 52   | 19.58  | 41   | 11.39  |   |
| 11878 | AABR07068327.1 | -1.72 | 14   | 11.56  | 11   | 6.72   |   |
| 11879 | Arl16          | -1.72 | 34   | 14.2   | 28   | 8.26   |   |
| 11880 | B9d1           | -1.72 | 0    | 4.19   | 0    | 2.44   |   |
| 11881 | Csf2ra         | -1.72 | 12   | 2.34   | 8    | 1.36   |   |
| 11882 | Cxcl16         | -1.72 | 9    | 1.91   | 9    | 1.11   |   |
| 11883 | Cxxc4          | -1.72 | 25   | 1.21   | 28   | 0.71   |   |
| 11884 | Dpep2          | -1.72 | 11   | 2      | 7    | 1.16   |   |
| 11885 | Foxo4          | -1.72 | 5    | 0.98   | 6    | 0.57   |   |
| 11886 | LOC498154      | -1.72 | 48   | 2.26   | 51   | 1.31   |   |
| 11887 | Mgat5          | -1.72 | 220  | 20.59  | 216  | 11.97  |   |
| 11888 | Nr0b2          | -1.72 | 11   | 2.93   | 9    | 1.71   |   |
| 11889 | Nrxn3_2        | -1.72 | 5    | 2.52   | 7    | 1.47   |   |
| 11890 | Pgam2          | -1.72 | 23   | 3.74   | 26   | 2.18   |   |
| 11891 | Pnpo           | -1.72 | 21   | 3.18   | 18   | 1.85   |   |
| 11892 | Raver2         | -1.72 | 67   | 6.64   | 49   | 3.86   |   |
| 11893 | RT1-N3         | -1.72 | 9    | 1.8    | 10   | 1.05   |   |
| 11894 | Slc28a2        | -1.72 | 17   | 0.78   | 23   | 0.46   |   |
| 11895 | SNORD29_1      | -1.72 | 9    | 50.92  | 6    | 29.61  |   |
| 11896 | Uvssa          | -1.72 | 16   | 2.48   | 19   | 1.44   |   |
| 11897 | Wdr5b          | -1.72 | 9    | 1.76   | 7    | 1.02   |   |
| 11898 | AABR07072537.1 | -1.72 | 9    | 1.19   | 7    | 0.69   |   |
| 11899 | Lipt1          | -1.72 | 10   | 1.18   | 8    | 0.69   |   |
| 11900 | Mbip           | -1.72 | 30   | 4.1    | 25   | 2.38   |   |
| 11901 | Nxnl2          | -1.72 | 73   | 14.63  | 86   | 8.51   |   |
| 11902 | Stk19          | -1.72 | 20   | 4.44   | 20   | 2.58   |   |
| 11903 | Tasp1          | -1.72 | 23   | 1.2    | 28   | 0.7    |   |
| 11904 | Clcn2          | -1.72 | 0    | 1.02   | 0    | 0.59   |   |
| 11905 | Nt5dc2         | -1.72 | 149  | 29.82  | 129  | 17.32  |   |
| 11906 | Ampd2          | -1.72 | 158  | 14.02  | 119  | 8.15   |   |
| 11907 | Wdr6           | -1.72 | 807  | 64.76  | 631  | 37.58  |   |
| 11908 | Acad10         | -1.72 | 149  | 10.45  | 141  | 6.06   |   |
| 11909 | Nt5c3b         | -1.72 | 185  | 17.26  | 136  | 10.01  |   |
| 11910 | Fshr           | -1.72 | 134  | 7.5    | 120  | 4.35   |   |
| 11911 | Dut            | -1.72 | 112  | 19     | 121  | 11.01  |   |
| 11912 | Fut11          | -1.72 | 55   | 11.77  | 50   | 6.83   |   |
| 11913 | Tor1a          | -1.72 | 104  | 22.33  | 83   | 12.95  |   |
| 11914 | Dcbld1         | -1.73 | 67   | 9.56   | 63   | 5.54   |   |
| 11915 | Slmo2          | -1.73 | 96   | 49.26  | 82   | 28.54  |   |
| 11916 | Pgam1          | -1.73 | 832  | 181.87 | 633  | 105.36 |   |
| 11917 | Pafah2         | -1.73 | 41   | 4.26   | 37   | 2.47   |   |
| 11918 | Sco1           | -1.73 | 32   | 7.11   | 30   | 4.12   |   |
| 11919 | Helz2          | -1.73 | 97   | 4.01   | 85   | 2.32   |   |
| 11920 | Snrnp25        | -1.73 | 57   | 25.02  | 44   | 14.47  |   |
| 11921 | Fndc3b         | -1.73 | 2634 | 182.59 | 2229 | 105.56 |   |

Supplemental Table 3  
 FSH + Ad-E versus FSH + Ad-FOXO1(A3), 24 hours

|       | A              | B     | C   | D      | E   | F     | G |
|-------|----------------|-------|-----|--------|-----|-------|---|
| 11922 | Cyb561d1       | -1.73 | 25  | 4.58   | 17  | 2.65  |   |
| 11923 | AABR07065406.1 | -1.73 | 19  | 7.39   | 13  | 4.27  |   |
| 11924 | Fuca2          | -1.73 | 27  | 4.82   | 19  | 2.79  |   |
| 11925 | Hyal2          | -1.73 | 242 | 43.9   | 190 | 25.36 |   |
| 11926 | Id1            | -1.73 | 109 | 41.57  | 87  | 24.02 |   |
| 11927 | Mark4          | -1.73 | 363 | 36.17  | 299 | 20.9  |   |
| 11928 | Rasgef1b       | -1.73 | 381 | 44.24  | 293 | 25.53 |   |
| 11929 | Mcm5           | -1.73 | 143 | 16.03  | 115 | 9.24  |   |
| 11930 | Sufu           | -1.73 | 82  | 7.32   | 85  | 4.22  |   |
| 11931 | Tmub1          | -1.73 | 37  | 8.89   | 27  | 5.13  |   |
| 11932 | Trerf1         | -1.73 | 270 | 16.24  | 227 | 9.37  |   |
| 11933 | Krtcap2        | -1.73 | 83  | 23.15  | 74  | 13.35 |   |
| 11934 | Atp5g2         | -1.74 | 419 | 260.78 | 335 | 150.2 |   |
| 11935 | Yipf1          | -1.74 | 183 | 29.86  | 166 | 17.19 |   |
| 11936 | Slc25a28       | -1.74 | 254 | 37.43  | 184 | 21.53 |   |
| 11937 | Lgals1         | -1.74 | 277 | 186.41 | 223 | 107.2 |   |
| 11938 | Lrrc16b        | -1.74 | 29  | 2.11   | 29  | 1.22  |   |
| 11939 | Pcbd2          | -1.74 | 26  | 12.26  | 21  | 7.05  |   |
| 11940 | Snx15          | -1.74 | 52  | 8.56   | 46  | 4.92  |   |
| 11941 | Sumf2          | -1.74 | 59  | 8.43   | 52  | 4.85  |   |
| 11942 | Zfp647         | -1.74 | 0   | 2.93   | 0   | 1.69  |   |
| 11943 | Bcl7a          | -1.74 | 42  | 7.44   | 30  | 4.28  |   |
| 11944 | Fabp3          | -1.74 | 107 | 43.18  | 87  | 24.83 |   |
| 11945 | Lmo3           | -1.74 | 22  | 1.97   | 17  | 1.13  |   |
| 11946 | Rap2a          | -1.74 | 71  | 7.11   | 63  | 4.09  |   |
| 11947 | Tcea2          | -1.74 | 37  | 7.88   | 28  | 4.53  |   |
| 11948 | Tm7sf3         | -1.74 | 65  | 9.2    | 51  | 5.29  |   |
| 11949 | Txnl4a         | -1.74 | 39  | 19.53  | 39  | 11.23 |   |
| 11950 | Adprh          | -1.74 | 130 | 28.8   | 114 | 16.55 |   |
| 11951 | Gdf11          | -1.74 | 57  | 5.05   | 45  | 2.9   |   |
| 11952 | Cgnl1          | -1.74 | 461 | 21.28  | 352 | 12.22 |   |
| 11953 | Gtf2ird2       | -1.74 | 168 | 14.04  | 157 | 8.05  |   |
| 11954 | Jagn1          | -1.74 | 126 | 36.88  | 100 | 21.14 |   |
| 11955 | Tmem39a        | -1.75 | 150 | 21.64  | 143 | 12.39 |   |
| 11956 | Rps10_2        | -1.75 | 64  | 126.14 | 33  | 72.18 |   |
| 11957 | AABR07029907.2 | -1.75 | 0   | 78.91  | 0   | 45.12 |   |
| 11958 | Chrm4          | -1.75 | 39  | 4.47   | 30  | 2.56  |   |
| 11959 | Copz2          | -1.75 | 58  | 20.2   | 56  | 11.55 |   |
| 11960 | Hdac6_2        | -1.75 | 0   | 1.77   | 0   | 1.01  |   |
| 11961 | RGD1562114     | -1.75 | 19  | 9.07   | 19  | 5.18  |   |
| 11962 | P4ha2          | -1.75 | 202 | 22.78  | 157 | 13.02 |   |
| 11963 | Trappc2l       | -1.75 | 40  | 31.03  | 33  | 17.74 |   |
| 11964 | Prpsap1        | -1.75 | 291 | 43.15  | 266 | 24.59 |   |
| 11965 | Alkbh8         | -1.76 | 91  | 5.88   | 105 | 3.35  |   |
| 11966 | RGD1302996     | -1.76 | 36  | 11.18  | 27  | 6.37  |   |
| 11967 | Scn2b          | -1.76 | 27  | 7.33   | 17  | 4.18  |   |
| 11968 | Tprn           | -1.76 | 24  | 2.78   | 21  | 1.59  |   |
| 11969 | Fibp           | -1.76 | 194 | 55.42  | 145 | 31.53 |   |
| 11970 | Pcolce         | -1.76 | 611 | 130.02 | 468 | 73.97 |   |
| 11971 | Hagh           | -1.76 | 54  | 14.07  | 52  | 8     |   |
| 11972 | Akr7a2         | -1.76 | 77  | 17.62  | 64  | 10.02 |   |
| 11973 | Sbk1           | -1.76 | 0   | 10.88  | 1   | 6.19  |   |
| 11974 | AABR07067267.1 | -1.76 | 29  | 10     | 24  | 5.68  |   |
| 11975 | Camta1_2       | -1.76 | 23  | 15.5   | 19  | 8.81  |   |

Supplemental Table 3  
 FSH + Ad-E versus FSH + Ad-FOXO1(A3), 24 hours

|       | A               | B     | C    | D       | E    | F      | G |
|-------|-----------------|-------|------|---------|------|--------|---|
| 11976 | Med7            | -1.76 | 31   | 7.72    | 31   | 4.39   |   |
| 11977 | Pts             | -1.76 | 34   | 7.51    | 22   | 4.26   |   |
| 11978 | Trappc2         | -1.76 | 33   | 6.63    | 43   | 3.77   |   |
| 11979 | AC107580.1      | -1.76 | 19   | 19.3    | 10   | 10.97  |   |
| 11980 | Tuba1c_2        | -1.76 | 18   | 49.13   | 15   | 27.9   |   |
| 11981 | Rab711          | -1.76 | 196  | 39.65   | 150  | 22.51  |   |
| 11982 | Ecm1            | -1.76 | 199  | 36      | 150  | 20.43  |   |
| 11983 | Cdc6            | -1.76 | 30   | 3.44    | 24   | 1.95   |   |
| 11984 | Gucd1           | -1.76 | 32   | 24.48   | 23   | 13.88  |   |
| 11985 | Pgls            | -1.76 | 63   | 9.45    | 52   | 5.35   |   |
| 11986 | Nudt14          | -1.77 | 44   | 14.38   | 30   | 8.14   |   |
| 11987 | Gusb            | -1.77 | 303  | 35.26   | 235  | 19.97  |   |
| 11988 | Rpl29           | -1.77 | 258  | 210.92  | 174  | 119.45 |   |
| 11989 | Tor2a           | -1.77 | 106  | 24.98   | 83   | 14.14  |   |
| 11990 | Ftl1            | -1.77 | 106  | 383.71  | 59   | 217.24 |   |
| 11991 | Agpat2          | -1.77 | 75   | 22.9    | 56   | 12.96  |   |
| 11992 | Rbm14           | -1.77 | 274  | 20.01   | 239  | 11.32  |   |
| 11993 | Mrpl12          | -1.77 | 86   | 18.07   | 69   | 10.22  |   |
| 11994 | Aurkb           | -1.77 | 43   | 3.37    | 37   | 1.91   |   |
| 11995 | Pgm5            | -1.77 | 64   | 8.71    | 60   | 4.92   |   |
| 11996 | Sox12           | -1.77 | 41   | 14.55   | 31   | 8.23   |   |
| 11997 | Phkg2           | -1.77 | 26   | 7.39    | 27   | 4.18   |   |
| 11998 | Tsply2          | -1.77 | 88   | 11      | 72   | 6.21   |   |
| 11999 | Ccnjl           | -1.77 | 103  | 3.73    | 73   | 2.1    |   |
| 12000 | Gpi             | -1.77 | 1089 | 180.85  | 841  | 102.15 |   |
| 12001 | Fth1            | -1.77 | 1539 | 2602.97 | 1104 | 1469.9 |   |
| 12002 | Rps17           | -1.77 | 37   | 434.48  | 18   | 245.29 |   |
| 12003 | Myocd           | -1.77 | 641  | 33.86   | 525  | 19.09  |   |
| 12004 | Tas1r2          | -1.77 | 106  | 3.13    | 100  | 1.76   |   |
| 12005 | Tmtc4           | -1.77 | 366  | 44.66   | 281  | 25.16  |   |
| 12006 | Tecr            | -1.78 | 705  | 249.73  | 537  | 140.67 |   |
| 12007 | Chpf2           | -1.78 | 259  | 22.53   | 194  | 12.68  |   |
| 12008 | Tapbp           | -1.78 | 208  | 44.94   | 157  | 25.29  |   |
| 12009 | Slc25a23        | -1.78 | 144  | 20.43   | 103  | 11.49  |   |
| 12010 | Tspan9          | -1.78 | 431  | 32.43   | 343  | 18.22  |   |
| 12011 | Eid2            | -1.78 | 4    | 2.05    | 3    | 1.15   |   |
| 12012 | Fam58b          | -1.78 | 24   | 7.47    | 18   | 4.19   |   |
| 12013 | LOC102547118    | -1.78 | 5    | 0.83    | 3    | 0.46   |   |
| 12014 | Ppp1r7          | -1.78 | 101  | 18.8    | 82   | 10.54  |   |
| 12015 | Thsd1           | -1.78 | 11   | 0.34    | 7    | 0.19   |   |
| 12016 | Tmem220         | -1.78 | 6    | 2.51    | 4    | 1.41   |   |
| 12017 | AABR07028970.2  | -1.78 | 7    | 4.69    | 12   | 2.63   |   |
| 12018 | AABR07035802.1  | -1.78 | 5    | 0.68    | 4    | 0.38   |   |
| 12019 | AABR07049064.1  | -1.78 | 7    | 1.53    | 12   | 0.86   |   |
| 12020 | AABR07056156.1  | -1.78 | 9    | 3.37    | 7    | 1.89   |   |
| 12021 | AABR07072761.1  | -1.78 | 1    | 1.68    | 2    | 0.94   |   |
| 12022 | Aard            | -1.78 | 8    | 2.33    | 6    | 1.31   |   |
| 12023 | AC098750.6      | -1.78 | 25   | 2.27    | 20   | 1.27   |   |
| 12024 | Birc5           | -1.78 | 16   | 3.32    | 17   | 1.86   |   |
| 12025 | Bmp6            | -1.78 | 178  | 22.85   | 152  | 12.81  |   |
| 12026 | ENSRNOG00000042 | -1.78 | 5    | 0.96    | 4    | 0.54   |   |
| 12027 | Eya2            | -1.78 | 14   | 0.51    | 14   | 0.29   |   |
| 12028 | Gabbr2          | -1.78 | 39   | 0.26    | 17   | 0.15   |   |
| 12029 | Gdnf            | -1.78 | 9    | 2.07    | 11   | 1.16   |   |

Supplemental Table 3  
 FSH + Ad-E versus FSH + Ad-FOXO1(A3), 24 hours

|       | A              | B     | C   | D     | E   | F     | G |
|-------|----------------|-------|-----|-------|-----|-------|---|
| 12030 | Gen1           | -1.78 | 13  | 1.01  | 13  | 0.57  |   |
| 12031 | Lck            | -1.78 | 5   | 0.7   | 4   | 0.39  |   |
| 12032 | Lgals5         | -1.78 | 2   | 1.6   | 1   | 0.89  |   |
| 12033 | Lhfpl1         | -1.78 | 4   | 0.68  | 3   | 0.38  |   |
| 12034 | LOC100911575   | -1.78 | 0   | 8.32  | 0   | 4.67  |   |
| 12035 | LOC100912338   | -1.78 | 4   | 3.8   | 3   | 2.13  |   |
| 12036 | LOC500077      | -1.78 | 15  | 2.69  | 12  | 1.51  |   |
| 12037 | Lrnf5          | -1.78 | 12  | 0.48  | 19  | 0.27  |   |
| 12038 | Mbp            | -1.78 | 13  | 0.43  | 20  | 0.24  |   |
| 12039 | Morn2          | -1.78 | 5   | 2.2   | 3   | 1.23  |   |
| 12040 | Nrm            | -1.78 | 10  | 4.44  | 6   | 2.49  |   |
| 12041 | Nyap1          | -1.78 | 0   | 0.64  | 0   | 0.36  |   |
| 12042 | Plag1          | -1.78 | 9   | 0.87  | 9   | 0.49  |   |
| 12043 | Pradc1         | -1.78 | 9   | 2.6   | 9   | 1.46  |   |
| 12044 | Prrt3          | -1.78 | 4   | 0.48  | 3   | 0.27  |   |
| 12045 | RGD1310819     | -1.78 | 5   | 0.35  | 5   | 0.19  |   |
| 12046 | RGD1560470     | -1.78 | 4   | 0.5   | 3   | 0.28  |   |
| 12047 | Rn60_10_0699.2 | -1.78 | 4   | 2.73  | 3   | 1.53  |   |
| 12048 | Rn60_4_1360.2  | -1.78 | 0   | 0.52  | 0   | 0.29  |   |
| 12049 | Rpp25          | -1.78 | 44  | 11.54 | 33  | 6.47  |   |
| 12050 | Sap30          | -1.78 | 12  | 6.58  | 12  | 3.69  |   |
| 12051 | Sema5b         | -1.78 | 7   | 0.44  | 5   | 0.25  |   |
| 12052 | Slc8a3         | -1.78 | 80  | 0.33  | 84  | 0.18  |   |
| 12053 | SNORD14_4      | -1.78 | 0   | 17.24 | 0   | 9.67  |   |
| 12054 | Tap1           | -1.78 | 51  | 4.82  | 36  | 2.7   |   |
| 12055 | Tbc1d2         | -1.78 | 36  | 1.68  | 31  | 0.94  |   |
| 12056 | Tigd3          | -1.78 | 4   | 0.91  | 3   | 0.51  |   |
| 12057 | Traf1          | -1.78 | 4   | 0.76  | 4   | 0.42  |   |
| 12058 | Tspan4         | -1.78 | 0   | 6.16  | 0   | 3.46  |   |
| 12059 | Wfikkn2        | -1.78 | 10  | 0.88  | 6   | 0.5   |   |
| 12060 | Zfp626         | -1.78 | 4   | 1.92  | 3   | 1.08  |   |
| 12061 | Zfp773         | -1.78 | 9   | 2.26  | 6   | 1.27  |   |
| 12062 | Zmiz2          | -1.78 | 3   | 6.3   | 4   | 3.53  |   |
| 12063 | AABR07036331.2 | -1.78 | 80  | 1.49  | 84  | 0.83  |   |
| 12064 | AABR07071661.1 | -1.78 | 17  | 0.46  | 28  | 0.26  |   |
| 12065 | Abi2           | -1.78 | 135 | 20.75 | 139 | 11.64 |   |
| 12066 | Adra1d         | -1.78 | 4   | 0.49  | 6   | 0.28  |   |
| 12067 | Art4           | -1.78 | 4   | 0.59  | 5   | 0.33  |   |
| 12068 | Col6a2         | -1.78 | 9   | 0.78  | 7   | 0.44  |   |
| 12069 | Donson         | -1.78 | 27  | 3.27  | 30  | 1.84  |   |
| 12070 | F2rl1          | -1.78 | 9   | 0.97  | 6   | 0.55  |   |
| 12071 | Galnt13        | -1.78 | 46  | 0.66  | 36  | 0.37  |   |
| 12072 | Kcne3          | -1.78 | 11  | 1.25  | 25  | 0.7   |   |
| 12073 | LOC297756      | -1.78 | 0   | 2.1   | 1   | 1.18  |   |
| 12074 | LOC360479      | -1.78 | 11  | 0.53  | 7   | 0.3   |   |
| 12075 | Pon3           | -1.78 | 13  | 3.99  | 11  | 2.24  |   |
| 12076 | Ptrhd1         | -1.78 | 8   | 3.16  | 6   | 1.77  |   |
| 12077 | Rab40b         | -1.78 | 12  | 0.77  | 8   | 0.43  |   |
| 12078 | Tle6           | -1.78 | 4   | 0.72  | 5   | 0.41  |   |
| 12079 | Zfp575         | -1.78 | 4   | 1.27  | 3   | 0.71  |   |
| 12080 | Zfp945         | -1.78 | 16  | 2.66  | 12  | 1.49  |   |
| 12081 | Gna11          | -1.79 | 175 | 42.64 | 151 | 23.86 |   |
| 12082 | Nsf            | -1.79 | 169 | 12.59 | 139 | 7.04  |   |
| 12083 | Prmt1          | -1.79 | 82  | 154.1 | 62  | 86.15 |   |



Supplemental Table 3  
 FSH + Ad-E versus FSH + Ad-FOXO1(A3), 24 hours

|       | A              | B     | C   | D      | E   | F      | G |
|-------|----------------|-------|-----|--------|-----|--------|---|
| 12084 | Tma7           | -1.79 | 18  | 54.17  | 21  | 30.25  |   |
| 12085 | Sgpp1          | -1.79 | 352 | 39.77  | 292 | 22.18  |   |
| 12086 | Rab34          | -1.79 | 249 | 75.15  | 186 | 41.9   |   |
| 12087 | Agpat4         | -1.79 | 471 | 49.44  | 449 | 27.55  |   |
| 12088 | Tmem178b       | -1.8  | 62  | 1.93   | 46  | 1.07   |   |
| 12089 | Klhl26         | -1.8  | 60  | 4.45   | 46  | 2.48   |   |
| 12090 | Ppp4c          | -1.8  | 190 | 45.13  | 141 | 25.11  |   |
| 12091 | Xxyt1          | -1.8  | 66  | 13.21  | 58  | 7.35   |   |
| 12092 | LOC100360087   | -1.8  | 120 | 252.01 | 66  | 140.12 |   |
| 12093 | Hrsp12         | -1.8  | 54  | 15.88  | 37  | 8.83   |   |
| 12094 | Adprm          | -1.8  | 43  | 9.51   | 39  | 5.28   |   |
| 12095 | Ngdn           | -1.8  | 88  | 21.09  | 72  | 11.71  |   |
| 12096 | Pc             | -1.8  | 39  | 2.82   | 40  | 1.57   |   |
| 12097 | Slc24a4        | -1.8  | 57  | 4.06   | 66  | 2.26   |   |
| 12098 | LOC501282      | -1.8  | 86  | 50.89  | 70  | 28.26  |   |
| 12099 | Timm21         | -1.8  | 33  | 8.55   | 30  | 4.74   |   |
| 12100 | L3mbtl2        | -1.8  | 231 | 22.19  | 205 | 12.3   |   |
| 12101 | Slc22a17       | -1.8  | 177 | 22.77  | 135 | 12.63  |   |
| 12102 | Traf3          | -1.8  | 321 | 12.65  | 266 | 7.01   |   |
| 12103 | Mpzl3          | -1.81 | 29  | 2.73   | 23  | 1.51   |   |
| 12104 | Tp53i3         | -1.81 | 29  | 6.15   | 28  | 3.41   |   |
| 12105 | Uba52          | -1.81 | 523 | 379.31 | 401 | 210    |   |
| 12106 | Osgin2         | -1.81 | 68  | 9.3    | 59  | 5.15   |   |
| 12107 | Emilin3        | -1.81 | 24  | 3.41   | 18  | 1.89   |   |
| 12108 | Mettl15        | -1.81 | 52  | 1.58   | 45  | 0.87   |   |
| 12109 | Polr3h         | -1.81 | 84  | 20.65  | 64  | 11.41  |   |
| 12110 | AC115322.4     | -1.81 | 118 | 292.89 | 67  | 161.75 |   |
| 12111 | Prdx2          | -1.81 | 917 | 368.27 | 695 | 203.33 |   |
| 12112 | Ccnf           | -1.81 | 119 | 11.69  | 88  | 6.45   |   |
| 12113 | Asns           | -1.81 | 44  | 6.83   | 31  | 3.77   |   |
| 12114 | Boc            | -1.82 | 84  | 4.98   | 81  | 2.74   |   |
| 12115 | Tesk2          | -1.82 | 33  | 2.27   | 30  | 1.25   |   |
| 12116 | Trpm3          | -1.82 | 82  | 1.05   | 90  | 0.58   |   |
| 12117 | Slc36a1        | -1.82 | 93  | 8.91   | 74  | 4.91   |   |
| 12118 | Lysmd2         | -1.82 | 95  | 14.5   | 81  | 7.98   |   |
| 12119 | RGD1560212     | -1.82 | 21  | 11.51  | 12  | 6.33   |   |
| 12120 | Mum111         | -1.82 | 35  | 3.02   | 25  | 1.66   |   |
| 12121 | Vamp7          | -1.82 | 79  | 24.89  | 76  | 13.69  |   |
| 12122 | Slc27a3        | -1.82 | 77  | 10.83  | 61  | 5.95   |   |
| 12123 | Hint1-ps1      | -1.82 | 125 | 92.67  | 103 | 50.93  |   |
| 12124 | Tmem147        | -1.82 | 62  | 20.37  | 42  | 11.19  |   |
| 12125 | Asrgl1         | -1.82 | 27  | 3.32   | 27  | 1.82   |   |
| 12126 | Eda2r          | -1.82 | 25  | 2.86   | 16  | 1.57   |   |
| 12127 | Fbxo5          | -1.82 | 33  | 4.58   | 24  | 2.51   |   |
| 12128 | Ticam2         | -1.82 | 28  | 1.64   | 20  | 0.9    |   |
| 12129 | AABR07053185.1 | -1.82 | 20  | 4.73   | 21  | 2.59   |   |
| 12130 | Mest           | -1.82 | 18  | 5.44   | 18  | 2.98   |   |
| 12131 | Polq           | -1.82 | 20  | 0.64   | 19  | 0.35   |   |
| 12132 | RGD1561582     | -1.82 | 93  | 15.82  | 66  | 8.67   |   |
| 12133 | Ethe1          | -1.82 | 77  | 21.15  | 65  | 11.6   |   |
| 12134 | Nt5m           | -1.82 | 31  | 4.13   | 35  | 2.26   |   |
| 12135 | Casp9          | -1.83 | 93  | 8.3    | 68  | 4.54   |   |
| 12136 | Hdac6_1        | -1.83 | 13  | 16.56  | 8   | 9.07   |   |
| 12137 | Sf3b5          | -1.83 | 209 | 106.28 | 153 | 58.17  |   |

Supplemental Table 3  
 FSH + Ad-E versus FSH + Ad-FOXO1(A3), 24 hours

|       | A              | B     | C    | D      | E    | F      | G |
|-------|----------------|-------|------|--------|------|--------|---|
| 12138 | Pnkd           | -1.83 | 112  | 9.1    | 87   | 4.98   |   |
| 12139 | Sfxn1          | -1.83 | 112  | 11.7   | 88   | 6.4    |   |
| 12140 | Bckdhh         | -1.83 | 53   | 9.94   | 41   | 5.44   |   |
| 12141 | Nop10          | -1.83 | 100  | 51.9   | 68   | 28.39  |   |
| 12142 | Mif            | -1.83 | 117  | 139.42 | 85   | 76.23  |   |
| 12143 | Fam64a         | -1.83 | 24   | 6.56   | 19   | 3.58   |   |
| 12144 | Htr1b          | -1.83 | 26   | 6.12   | 19   | 3.34   |   |
| 12145 | Skp2           | -1.83 | 62   | 6.35   | 56   | 3.47   |   |
| 12146 | Mro            | -1.83 | 132  | 22.32  | 122  | 12.18  |   |
| 12147 | Klhl17         | -1.83 | 48   | 6.53   | 37   | 3.56   |   |
| 12148 | Tmem104        | -1.83 | 67   | 8.8    | 77   | 4.79   |   |
| 12149 | Ldhd           | -1.84 | 424  | 104.57 | 300  | 56.97  |   |
| 12150 | Stoml2         | -1.84 | 78   | 19.59  | 59   | 10.67  |   |
| 12151 | Zmym3          | -1.84 | 754  | 43.65  | 547  | 23.77  |   |
| 12152 | Plbd1          | -1.84 | 410  | 67.46  | 287  | 36.73  |   |
| 12153 | Itm2c          | -1.84 | 1508 | 281.4  | 1114 | 153.17 |   |
| 12154 | Atox1          | -1.84 | 33   | 14.4   | 30   | 7.83   |   |
| 12155 | Havcr1         | -1.84 | 43   | 4.07   | 37   | 2.21   |   |
| 12156 | Ldhd           | -1.84 | 145  | 4.05   | 196  | 2.2    |   |
| 12157 | Magee2         | -1.84 | 11   | 1.87   | 8    | 1.02   |   |
| 12158 | Mertk          | -1.84 | 19   | 0.86   | 16   | 0.47   |   |
| 12159 | Nudt1          | -1.84 | 15   | 4.62   | 14   | 2.51   |   |
| 12160 | RGD1307155     | -1.84 | 27   | 5.97   | 23   | 3.24   |   |
| 12161 | Rnf138         | -1.84 | 49   | 6.32   | 55   | 3.44   |   |
| 12162 | Rpl35a_1       | -1.84 | 0    | 11.44  | 0    | 6.22   |   |
| 12163 | Senp17_2       | -1.84 | 28   | 11.16  | 25   | 6.07   |   |
| 12164 | Tnfrsf10b      | -1.84 | 14   | 1.91   | 9    | 1.04   |   |
| 12165 | Spef1          | -1.84 | 12   | 2.65   | 11   | 1.44   |   |
| 12166 | Rogdi          | -1.84 | 99   | 22.5   | 77   | 12.22  |   |
| 12167 | Tcta           | -1.84 | 55   | 10.91  | 44   | 5.92   |   |
| 12168 | Msh2           | -1.84 | 474  | 50.39  | 345  | 27.32  |   |
| 12169 | Dad1           | -1.85 | 191  | 70.15  | 159  | 38     |   |
| 12170 | AABR07015057.1 | -1.85 | 1059 | 876.66 | 567  | 474.45 |   |
| 12171 | Slc16a1        | -1.85 | 368  | 51.1   | 284  | 27.65  |   |
| 12172 | Efnb1          | -1.85 | 225  | 24.86  | 164  | 13.44  |   |
| 12173 | Angptl4        | -1.85 | 23   | 3.45   | 16   | 1.86   |   |
| 12174 | Fxn            | -1.85 | 36   | 8.14   | 42   | 4.39   |   |
| 12175 | Galnt10        | -1.85 | 209  | 17.97  | 178  | 9.7    |   |
| 12176 | Timp2          | -1.85 | 253  | 52.53  | 206  | 28.36  |   |
| 12177 | Lsr            | -1.85 | 673  | 104.14 | 558  | 56.19  |   |
| 12178 | Slc7a5         | -1.85 | 147  | 14.66  | 109  | 7.91   |   |
| 12179 | Mfsd12         | -1.86 | 94   | 17.01  | 74   | 9.17   |   |
| 12180 | Chpf           | -1.86 | 350  | 42.7   | 257  | 23.01  |   |
| 12181 | Ogdhl          | -1.86 | 150  | 14.29  | 111  | 7.7    |   |
| 12182 | Agk            | -1.86 | 37   | 4.93   | 39   | 2.65   |   |
| 12183 | Serhl2         | -1.86 | 4    | 3.63   | 3    | 1.95   |   |
| 12184 | Glmn           | -1.86 | 61   | 3.93   | 74   | 2.12   |   |
| 12185 | Hist1h4b_6     | -1.86 | 22   | 6.98   | 18   | 3.76   |   |
| 12186 | RGD1307554     | -1.86 | 89   | 7.34   | 73   | 3.95   |   |
| 12187 | Sys1           | -1.86 | 25   | 9.14   | 22   | 4.92   |   |
| 12188 | Osgep          | -1.86 | 33   | 6.45   | 27   | 3.47   |   |
| 12189 | Pih1d1         | -1.86 | 27   | 7.06   | 22   | 3.8    |   |
| 12190 | Rps15          | -1.86 | 417  | 315.5  | 288  | 169.67 |   |
| 12191 | Caskin1        | -1.86 | 75   | 3.48   | 50   | 1.87   |   |

Supplemental Table 3  
 FSH + Ad-E versus FSH + Ad-FOXO1(A3), 24 hours

|       | A              | B     | C    | D      | E    | F     | G |
|-------|----------------|-------|------|--------|------|-------|---|
| 12192 | Chst14         | -1.86 | 114  | 20.06  | 82   | 10.79 |   |
| 12193 | March2         | -1.86 | 440  | 90.52  | 355  | 48.65 |   |
| 12194 | Psrc1          | -1.86 | 34   | 6.33   | 26   | 3.4   |   |
| 12195 | Bmyc           | -1.86 | 39   | 18.58  | 28   | 9.97  |   |
| 12196 | Bscl2          | -1.86 | 97   | 24.9   | 65   | 13.37 |   |
| 12197 | Lama4          | -1.86 | 108  | 4.75   | 75   | 2.55  |   |
| 12198 | Nagpa          | -1.86 | 41   | 6.61   | 35   | 3.55  |   |
| 12199 | Nqo1           | -1.86 | 40   | 8.94   | 34   | 4.8   |   |
| 12200 | Qsox2          | -1.86 | 302  | 22.42  | 229  | 12.03 |   |
| 12201 | Clpp           | -1.86 | 51   | 20.34  | 41   | 10.91 |   |
| 12202 | Ndufb8         | -1.87 | 273  | 136.1  | 208  | 72.95 |   |
| 12203 | Baiap2         | -1.87 | 153  | 11.65  | 105  | 6.24  |   |
| 12204 | Tmbim4         | -1.87 | 146  | 52.85  | 104  | 28.31 |   |
| 12205 | Sulf2          | -1.87 | 520  | 42.79  | 382  | 22.9  |   |
| 12206 | Nubp1          | -1.87 | 95   | 26.49  | 74   | 14.18 |   |
| 12207 | Cdkn1a         | -1.87 | 177  | 30.64  | 130  | 16.38 |   |
| 12208 | Cds1           | -1.87 | 13   | 1.29   | 7    | 0.69  |   |
| 12209 | Dhrs3          | -1.87 | 63   | 8.53   | 51   | 4.56  |   |
| 12210 | Gnb1l          | -1.87 | 73   | 1.6    | 99   | 0.85  |   |
| 12211 | LOC687399      | -1.87 | 10   | 1.7    | 7    | 0.91  |   |
| 12212 | Mmp17          | -1.87 | 8    | 0.72   | 5    | 0.39  |   |
| 12213 | Noa1           | -1.87 | 81   | 9.21   | 68   | 4.92  |   |
| 12214 | Pir            | -1.87 | 34   | 5.03   | 29   | 2.69  |   |
| 12215 | RT1-S3         | -1.87 | 5    | 1.43   | 4    | 0.77  |   |
| 12216 | AC107580.4     | -1.87 | 0    | 1.67   | 0    | 0.89  |   |
| 12217 | Arg2           | -1.87 | 17   | 1.66   | 27   | 0.89  |   |
| 12218 | Fam122b        | -1.87 | 1    | 2.77   | 0    | 1.48  |   |
| 12219 | Hap1           | -1.87 | 49   | 4.92   | 39   | 2.63  |   |
| 12220 | Magohb         | -1.87 | 20   | 6.37   | 16   | 3.4   |   |
| 12221 | Mms22l         | -1.87 | 97   | 5.09   | 64   | 2.72  |   |
| 12222 | Pkd1l1         | -1.87 | 11   | 0.32   | 10   | 0.17  |   |
| 12223 | Pnmal2         | -1.87 | 14   | 1.97   | 10   | 1.05  |   |
| 12224 | Scn1a          | -1.87 | 8    | 0.21   | 7    | 0.11  |   |
| 12225 | Tatdn1         | -1.87 | 45   | 2.87   | 49   | 1.53  |   |
| 12226 | Them6          | -1.87 | 30   | 6.57   | 21   | 3.51  |   |
| 12227 | AABR07035074.1 | -1.87 | 10   | 1.32   | 4    | 0.7   |   |
| 12228 | Kdr            | -1.87 | 46   | 2.4    | 32   | 1.28  |   |
| 12229 | Mtg1           | -1.87 | 74   | 15.07  | 56   | 8.05  |   |
| 12230 | Pcdhga3        | -1.87 | 7    | 1.05   | 5    | 0.56  |   |
| 12231 | Rn60_13_0829.4 | -1.87 | 8    | 2.57   | 6    | 1.37  |   |
| 12232 | Dbi            | -1.88 | 142  | 18.22  | 93   | 9.71  |   |
| 12233 | LOC301124      | -1.88 | 146  | 36.46  | 106  | 19.42 |   |
| 12234 | Fat1           | -1.88 | 5218 | 123.96 | 3759 | 66.01 |   |
| 12235 | Ubox5          | -1.88 | 92   | 6.53   | 98   | 3.48  |   |
| 12236 | Wdr24          | -1.88 | 118  | 15.6   | 87   | 8.3   |   |
| 12237 | Cdc34          | -1.88 | 144  | 46.69  | 98   | 24.82 |   |
| 12238 | Mrpl3          | -1.88 | 158  | 26.6   | 154  | 14.13 |   |
| 12239 | Psmc5          | -1.88 | 139  | 36.83  | 104  | 19.55 |   |
| 12240 | Fis1           | -1.89 | 169  | 34.25  | 150  | 18.16 |   |
| 12241 | Cpz            | -1.89 | 86   | 14.37  | 62   | 7.62  |   |
| 12242 | Cacfd1         | -1.89 | 140  | 10.3   | 122  | 5.46  |   |
| 12243 | Id3            | -1.89 | 565  | 225.3  | 357  | 119.2 |   |
| 12244 | Atp2b4         | -1.89 | 602  | 24.23  | 453  | 12.82 |   |
| 12245 | Mthfr          | -1.89 | 140  | 12.99  | 106  | 6.86  |   |

Supplemental Table 3  
 FSH + Ad-E versus FSH + Ad-FOXO1(A3), 24 hours

|       | A              | B     | C   | D      | E   | F      | G |
|-------|----------------|-------|-----|--------|-----|--------|---|
| 12246 | Oaf            | -1.89 | 104 | 18.18  | 81  | 9.59   |   |
| 12247 | Tspan17        | -1.89 | 42  | 7.46   | 31  | 3.94   |   |
| 12248 | Adamts17       | -1.89 | 41  | 1.83   | 39  | 0.97   |   |
| 12249 | Chchd6         | -1.89 | 29  | 5.71   | 29  | 3.01   |   |
| 12250 | Micall2        | -1.89 | 22  | 1.91   | 13  | 1.01   |   |
| 12251 | Smim3          | -1.89 | 74  | 14.47  | 63  | 7.64   |   |
| 12252 | Tstd3          | -1.89 | 17  | 3.86   | 14  | 2.04   |   |
| 12253 | Gorasp2_2      | -1.89 | 0   | 4.4    | 0   | 2.32   |   |
| 12254 | Tgfa           | -1.9  | 179 | 11.74  | 143 | 6.19   |   |
| 12255 | Pced1a         | -1.9  | 69  | 8.93   | 54  | 4.7    |   |
| 12256 | Fam188b        | -1.9  | 90  | 5.66   | 82  | 2.98   |   |
| 12257 | Noc4l          | -1.9  | 75  | 14.64  | 53  | 7.71   |   |
| 12258 | Srm            | -1.9  | 0   | 28.52  | 0   | 15.01  |   |
| 12259 | Ergic3         | -1.9  | 269 | 67.08  | 196 | 35.24  |   |
| 12260 | Mrpl14         | -1.91 | 55  | 19.25  | 41  | 10.11  |   |
| 12261 | Dhps           | -1.91 | 115 | 27.48  | 85  | 14.42  |   |
| 12262 | Lemd2          | -1.91 | 21  | 14.67  | 18  | 7.69   |   |
| 12263 | Klhl11         | -1.91 | 245 | 35.18  | 180 | 18.45  |   |
| 12264 | Phb            | -1.91 | 162 | 50.18  | 125 | 26.31  |   |
| 12265 | Pccb           | -1.91 | 180 | 28.63  | 131 | 15.01  |   |
| 12266 | Lppr2          | -1.91 | 10  | 1.26   | 7   | 0.66   |   |
| 12267 | AABR07008379.1 | -1.91 | 1   | 8.27   | 0   | 4.33   |   |
| 12268 | Gabrg1         | -1.91 | 19  | 2.08   | 15  | 1.09   |   |
| 12269 | Lama2          | -1.91 | 32  | 0.38   | 22  | 0.2    |   |
| 12270 | LOC100910152   | -1.91 | 3   | 7.5    | 3   | 3.92   |   |
| 12271 | LOC100912512   | -1.91 | 12  | 1.35   | 12  | 0.71   |   |
| 12272 | Mrpl42         | -1.91 | 47  | 21.58  | 44  | 11.3   |   |
| 12273 | Piwil4         | -1.91 | 14  | 1.14   | 12  | 0.6    |   |
| 12274 | RGD1561916     | -1.91 | 13  | 3.11   | 14  | 1.63   |   |
| 12275 | Tmem53         | -1.91 | 46  | 2.53   | 52  | 1.32   |   |
| 12276 | AABR07061178.1 | -1.91 | 13  | 4.7    | 17  | 2.46   |   |
| 12277 | Cox7c          | -1.91 | 321 | 221.52 | 236 | 115.93 |   |
| 12278 | Hmgb1          | -1.91 | 67  | 10.21  | 68  | 5.35   |   |
| 12279 | Irak1bp1       | -1.91 | 22  | 2.94   | 19  | 1.54   |   |
| 12280 | Lrfn3          | -1.91 | 22  | 3.07   | 15  | 1.61   |   |
| 12281 | Rnmtl1         | -1.91 | 11  | 2.46   | 8   | 1.29   |   |
| 12282 | Slc14a2_2      | -1.91 | 6   | 2.01   | 5   | 1.05   |   |
| 12283 | Smco4          | -1.91 | 53  | 20.09  | 39  | 10.52  |   |
| 12284 | Snai2          | -1.91 | 10  | 1.85   | 7   | 0.97   |   |
| 12285 | Foxl2          | -1.91 | 112 | 36.37  | 78  | 19.01  |   |
| 12286 | Ubl5           | -1.91 | 91  | 64.91  | 64  | 33.91  |   |
| 12287 | Lsm3           | -1.92 | 48  | 21.96  | 29  | 11.45  |   |
| 12288 | Cdca8          | -1.92 | 45  | 7.88   | 28  | 4.1    |   |
| 12289 | Dusp7          | -1.92 | 35  | 3.82   | 24  | 1.99   |   |
| 12290 | Uqcc2          | -1.92 | 30  | 23.85  | 31  | 12.43  |   |
| 12291 | Slc26a6        | -1.92 | 49  | 3.31   | 40  | 1.72   |   |
| 12292 | Lrig3          | -1.92 | 40  | 2.19   | 32  | 1.14   |   |
| 12293 | Oma1           | -1.92 | 35  | 4.53   | 28  | 2.36   |   |
| 12294 | Pold2          | -1.92 | 24  | 4.92   | 17  | 2.56   |   |
| 12295 | Mrpl49         | -1.92 | 21  | 16.36  | 14  | 8.51   |   |
| 12296 | Dhcr24         | -1.93 | 536 | 48.06  | 378 | 24.93  |   |
| 12297 | Amhr2          | -1.93 | 175 | 26.19  | 138 | 13.57  |   |
| 12298 | Mrpl1          | -1.93 | 1   | 4.24   | 0   | 2.19   |   |
| 12299 | Rilpl2         | -1.93 | 60  | 14.61  | 52  | 7.56   |   |

Supplemental Table 3  
 FSH + Ad-E versus FSH + Ad-FOXO1(A3), 24 hours

|       | A              | B     | C    | D      | E    | F      | G |
|-------|----------------|-------|------|--------|------|--------|---|
| 12300 | Sass6_2        | -1.93 | 10   | 2.18   | 6    | 1.13   |   |
| 12301 | Smg9           | -1.93 | 68   | 6.95   | 52   | 3.6    |   |
| 12302 | Spry2          | -1.93 | 55   | 10.4   | 36   | 5.38   |   |
| 12303 | Syng1          | -1.93 | 56   | 7.84   | 50   | 4.06   |   |
| 12304 | Tmem241        | -1.93 | 51   | 4.08   | 51   | 2.11   |   |
| 12305 | Ypel1          | -1.93 | 27   | 12.76  | 50   | 6.6    |   |
| 12306 | Zfp691         | -1.93 | 65   | 16.13  | 49   | 8.35   |   |
| 12307 | Aox1           | -1.93 | 16   | 1.09   | 16   | 0.56   |   |
| 12308 | Tomm6          | -1.93 | 14   | 20.92  | 14   | 10.83  |   |
| 12309 | Fkbp10         | -1.93 | 683  | 81.09  | 473  | 41.96  |   |
| 12310 | Rhbd13         | -1.94 | 80   | 5.31   | 63   | 2.74   |   |
| 12311 | Ecsit          | -1.94 | 70   | 13.38  | 62   | 6.91   |   |
| 12312 | Foxred2        | -1.94 | 57   | 4.3    | 42   | 2.22   |   |
| 12313 | P3h4           | -1.94 | 212  | 40.43  | 150  | 20.88  |   |
| 12314 | Tmem41a        | -1.94 | 46   | 9.62   | 40   | 4.97   |   |
| 12315 | Nckipsd        | -1.94 | 49   | 4.43   | 38   | 2.28   |   |
| 12316 | Nosip          | -1.94 | 96   | 13.63  | 88   | 7.01   |   |
| 12317 | Frmf5          | -1.94 | 290  | 26.21  | 218  | 13.48  |   |
| 12318 | Acbd5          | -1.95 | 8    | 2.51   | 5    | 1.29   |   |
| 12319 | Adcy5          | -1.95 | 90   | 3.58   | 92   | 1.84   |   |
| 12320 | Cox14          | -1.95 | 16   | 33.29  | 11   | 17.11  |   |
| 12321 | Cybrd1         | -1.95 | 53   | 4.45   | 40   | 2.29   |   |
| 12322 | Fam220a        | -1.95 | 53   | 10.15  | 38   | 5.21   |   |
| 12323 | Fam83d         | -1.95 | 17   | 2.57   | 14   | 1.32   |   |
| 12324 | Purg           | -1.95 | 16   | 3.99   | 11   | 2.05   |   |
| 12325 | AC126892.1     | -1.95 | 0    | 10.19  | 1    | 5.23   |   |
| 12326 | RGD1307752     | -1.95 | 147  | 47.61  | 125  | 24.44  |   |
| 12327 | Ssna1          | -1.95 | 70   | 31.1   | 50   | 15.94  |   |
| 12328 | Coa7           | -1.95 | 41   | 4.56   | 30   | 2.34   |   |
| 12329 | Kcne2          | -1.95 | 229  | 36.9   | 162  | 18.92  |   |
| 12330 | AABR07002008.1 | -1.95 | 20   | 2.72   | 17   | 1.39   |   |
| 12331 | LOC100911186   | -1.95 | 0    | 9.28   | 0    | 4.75   |   |
| 12332 | Lxn            | -1.95 | 14   | 6.42   | 11   | 3.28   |   |
| 12333 | Mgst3          | -1.95 | 20   | 11.47  | 17   | 5.86   |   |
| 12334 | Stox2          | -1.95 | 29   | 1.2    | 19   | 0.61   |   |
| 12335 | Nudt22         | -1.95 | 23   | 6.43   | 19   | 3.29   |   |
| 12336 | Pycr2          | -1.95 | 96   | 21.32  | 67   | 10.91  |   |
| 12337 | Chst2          | -1.95 | 38   | 8.64   | 26   | 4.42   |   |
| 12338 | St3gal4        | -1.96 | 2552 | 351.69 | 1913 | 179.85 |   |
| 12339 | Zbtb45         | -1.96 | 82   | 13.02  | 58   | 6.65   |   |
| 12340 | LOC100912604   | -1.96 | 0    | 30.58  | 0    | 15.62  |   |
| 12341 | Ptgr1          | -1.96 | 77   | 18.51  | 54   | 9.45   |   |
| 12342 | Cuta           | -1.96 | 96   | 38.61  | 71   | 19.7   |   |
| 12343 | Abcg1          | -1.96 | 25   | 2.05   | 20   | 1.04   |   |
| 12344 | Tlcd1          | -1.96 | 17   | 1.9    | 17   | 0.97   |   |
| 12345 | LOC100360647   | -1.96 | 70   | 182.93 | 48   | 93.23  |   |
| 12346 | Qpctl          | -1.96 | 112  | 15.21  | 88   | 7.75   |   |
| 12347 | Dlg4           | -1.96 | 85   | 7.74   | 67   | 3.94   |   |
| 12348 | Egfr           | -1.96 | 460  | 30.83  | 347  | 15.69  |   |
| 12349 | Tob1           | -1.97 | 214  | 38.56  | 146  | 19.62  |   |
| 12350 | Acads          | -1.97 | 141  | 25.61  | 97   | 13.02  |   |
| 12351 | Chst12         | -1.97 | 25   | 5.61   | 17   | 2.85   |   |
| 12352 | Reep4          | -1.97 | 108  | 18.99  | 74   | 9.65   |   |
| 12353 | Usb1           | -1.97 | 38   | 4.23   | 30   | 2.15   |   |

Supplemental Table 3  
 FSH + Ad-E versus FSH + Ad-FOXO1(A3), 24 hours

|       | A              | B     | C    | D      | E    | F      | G                                                                                     |
|-------|----------------|-------|------|--------|------|--------|---------------------------------------------------------------------------------------|
| 12354 | Abcb8          | -1.97 | 123  | 11.87  | 108  | 6.03   |                                                                                       |
| 12355 | Adam8          | -1.97 | 48   | 3.64   | 27   | 1.84   |                                                                                       |
| 12356 | Fgfr1          | -1.97 | 408  | 38.89  | 306  | 19.73  |                                                                                       |
| 12357 | Kif2c          | -1.97 | 43   | 3.87   | 25   | 1.96   |                                                                                       |
| 12358 | Tmem229b       | -1.97 | 33   | 2.98   | 38   | 1.51   |                                                                                       |
| 12359 | Slc25a42       | -1.98 | 87   | 8.78   | 67   | 4.44   |                                                                                       |
| 12360 | Chpt1          | -1.98 | 50   | 8.05   | 52   | 4.07   |                                                                                       |
| 12361 | Igfbp5         | -1.98 | 5094 | 314.29 | 3479 | 158.83 |                                                                                       |
| 12362 | Rhbdd3         | -1.98 | 51   | 8.42   | 39   | 4.25   |                                                                                       |
| 12363 | Nxn            | -1.99 | 167  | 27.15  | 164  | 13.67  |                                                                                       |
| 12364 | Zfp710         | -1.99 | 93   | 6.97   | 115  | 3.51   |                                                                                       |
| 12365 | LOC690000      | -1.99 | 68   | 8.7    | 46   | 4.37   |                                                                                       |
| 12366 | Rpl7a_2        | -1.99 | 0    | 34.48  | 0    | 17.3   |                                                                                       |
| 12367 | Trmt112        | -1.99 | 83   | 51.9   | 57   | 26.03  |                                                                                       |
|       |                |       |      |        |      |        | Genes used for<br>Pathway Studio<br>analysis & down-<br>regulated by Ad-<br>FOXO1(A3) |
| 12368 | Pofut2         | -2    | 316  | 48.56  | 214  | 24.33  |                                                                                       |
| 12369 | Atp1b2         | -2    | 350  | 42.24  | 236  | 21.14  |                                                                                       |
| 12370 | Ninj1          | -2    | 152  | 47.13  | 112  | 23.57  |                                                                                       |
| 12371 | Gpx4           | -2    | 381  | 148.45 | 241  | 74.15  |                                                                                       |
| 12372 | Rps16          | -2    | 505  | 260.83 | 320  | 130.22 |                                                                                       |
| 12373 | Aph1a          | -2    | 342  | 59.72  | 231  | 29.81  |                                                                                       |
| 12374 | AABR07049682.1 | -2.01 | 4    | 0.22   | 1    | 0.11   |                                                                                       |
| 12375 | Cdhr1          | -2.01 | 3    | 0.25   | 3    | 0.13   |                                                                                       |
| 12376 | F11r           | -2.01 | 17   | 2.28   | 12   | 1.14   |                                                                                       |
| 12377 | LOC100912427   | -2.01 | 0    | 1.12   | 0    | 0.56   |                                                                                       |
| 12378 | LOC680519      | -2.01 | 4    | 0.41   | 4    | 0.21   |                                                                                       |
| 12379 | Ppapdc3        | -2.01 | 37   | 3.87   | 26   | 1.93   |                                                                                       |
| 12380 | Prex1          | -2.01 | 8    | 0.22   | 9    | 0.11   |                                                                                       |
| 12381 | Ptn            | -2.01 | 43   | 9.95   | 30   | 4.96   |                                                                                       |
| 12382 | RGD1561919     | -2.01 | 1    | 2.37   | 0    | 1.18   |                                                                                       |
| 12383 | SNORA71_5      | -2.01 | 3    | 8.23   | 2    | 4.1    |                                                                                       |
| 12384 | SNORD74        | -2.01 | 6    | 26.82  | 4    | 13.37  |                                                                                       |
| 12385 | Spata25        | -2.01 | 4    | 0.69   | 2    | 0.34   |                                                                                       |
| 12386 | Spns2          | -2.01 | 3    | 0.28   | 7    | 0.14   |                                                                                       |
| 12387 | Stard5         | -2.01 | 24   | 6.33   | 22   | 3.15   |                                                                                       |
| 12388 | Tmem251        | -2.01 | 2    | 2.21   | 0    | 1.1    |                                                                                       |
| 12389 | AABR07002885.1 | -2.01 | 0    | 0.32   | 0    | 0.16   |                                                                                       |
| 12390 | AABR07005633.1 | -2.01 | 3    | 3.12   | 2    | 1.56   |                                                                                       |
| 12391 | AABR07010460.1 | -2.01 | 3    | 0.62   | 3    | 0.31   |                                                                                       |
| 12392 | AABR07012795.1 | -2.01 | 2    | 3.7    | 1    | 1.85   |                                                                                       |
| 12393 | AABR07024907.1 | -2.01 | 0    | 3.2    | 0    | 1.6    |                                                                                       |
| 12394 | AABR07037203.1 | -2.01 | 2    | 1.41   | 2    | 0.7    |                                                                                       |
| 12395 | AABR07038019.1 | -2.01 | 0    | 2.23   | 0    | 1.11   |                                                                                       |
| 12396 | AABR07045217.1 | -2.01 | 5    | 2.69   | 5    | 1.34   |                                                                                       |
| 12397 | AABR07055280.1 | -2.01 | 1    | 0.85   | 0    | 0.42   |                                                                                       |
| 12398 | Abcb6          | -2.01 | 49   | 5.26   | 34   | 2.62   |                                                                                       |
| 12399 | Ablim3         | -2.01 | 8    | 0.43   | 3    | 0.21   |                                                                                       |
| 12400 | AC095263.1     | -2.01 | 13   | 2.47   | 5    | 1.23   |                                                                                       |
| 12401 | AC108546.1     | -2.01 | 0    | 1.49   | 0    | 0.74   |                                                                                       |
| 12402 | AC111781.1     | -2.01 | 3    | 0.87   | 2    | 0.44   |                                                                                       |
| 12403 | AC131885.1     | -2.01 | 0    | 3.73   | 0    | 1.86   |                                                                                       |

Supplemental Table 3  
 FSH + Ad-E versus FSH + Ad-FOXO1(A3), 24 hours

|       | A            | B     | C  | D     | E  | F     | G |
|-------|--------------|-------|----|-------|----|-------|---|
| 12404 | Acp5         | -2.01 | 16 | 2.8   | 8  | 1.4   |   |
| 12405 | Adcyap1      | -2.01 | 15 | 1.88  | 16 | 0.93  |   |
| 12406 | Adprhl1      | -2.01 | 19 | 0.37  | 16 | 0.18  |   |
| 12407 | Aldh1a3      | -2.01 | 6  | 0.64  | 5  | 0.32  |   |
| 12408 | B3gat2       | -2.01 | 12 | 0.54  | 2  | 0.27  |   |
| 12409 | Bnc1         | -2.01 | 3  | 0.23  | 5  | 0.11  |   |
| 12410 | C4a_1        | -2.01 | 0  | 0.2   | 0  | 0.1   |   |
| 12411 | Ccdc155      | -2.01 | 4  | 0.59  | 3  | 0.29  |   |
| 12412 | Ccrl2        | -2.01 | 18 | 3.26  | 12 | 1.62  |   |
| 12413 | Cenpk        | -2.01 | 6  | 0.66  | 8  | 0.33  |   |
| 12414 | Col23a1_2    | -2.01 | 10 | 1.99  | 9  | 0.99  |   |
| 12415 | Comtd1       | -2.01 | 36 | 5.18  | 25 | 2.58  |   |
| 12416 | Cracr2b_1    | -2.01 | 0  | 0.68  | 0  | 0.34  |   |
| 12417 | Cth          | -2.01 | 2  | 1.19  | 1  | 0.6   |   |
| 12418 | Cyp2r1       | -2.01 | 4  | 0.64  | 2  | 0.32  |   |
| 12419 | Dnph1        | -2.01 | 4  | 1.41  | 3  | 0.7   |   |
| 12420 | Elavl2       | -2.01 | 17 | 0.79  | 9  | 0.39  |   |
| 12421 | Ephb2        | -2.01 | 5  | 0.22  | 5  | 0.11  |   |
| 12422 | Exo1         | -2.01 | 11 | 1.3   | 10 | 0.65  |   |
| 12423 | Fam227b      | -2.01 | 18 | 0.6   | 14 | 0.3   |   |
| 12424 | Fam229b      | -2.01 | 3  | 1.62  | 6  | 0.81  |   |
| 12425 | Fbxl8        | -2.01 | 16 | 2.22  | 8  | 1.1   |   |
| 12426 | Gal          | -2.01 | 3  | 1.29  | 2  | 0.64  |   |
| 12427 | Gda          | -2.01 | 18 | 0.65  | 6  | 0.32  |   |
| 12428 | Gja5         | -2.01 | 10 | 1.06  | 6  | 0.53  |   |
| 12429 | Gla          | -2.01 | 63 | 17.2  | 51 | 8.57  |   |
| 12430 | Gna14        | -2.01 | 6  | 0.4   | 9  | 0.2   |   |
| 12431 | Gria2        | -2.01 | 5  | 0.16  | 9  | 0.08  |   |
| 12432 | Gsta2        | -2.01 | 0  | 1.35  | 0  | 0.67  |   |
| 12433 | Gtpbp6_1     | -2.01 | 0  | 1.41  | 0  | 0.7   |   |
| 12434 | Hao2         | -2.01 | 69 | 3.94  | 28 | 1.97  |   |
| 12435 | Hist1h2bl    | -2.01 | 3  | 2.85  | 0  | 1.42  |   |
| 12436 | Hpx          | -2.01 | 4  | 0.69  | 5  | 0.35  |   |
| 12437 | Hvcn1        | -2.01 | 11 | 0.92  | 10 | 0.46  |   |
| 12438 | Ier5l        | -2.01 | 6  | 1.38  | 4  | 0.69  |   |
| 12439 | Irf7         | -2.01 | 20 | 2.75  | 12 | 1.37  |   |
| 12440 | Kcp          | -2.01 | 4  | 0.23  | 3  | 0.12  |   |
| 12441 | Kif26b       | -2.01 | 88 | 1.9   | 70 | 0.95  |   |
| 12442 | L3mbtl1      | -2.01 | 17 | 0.43  | 16 | 0.21  |   |
| 12443 | Lamc2        | -2.01 | 5  | 0.21  | 5  | 0.1   |   |
| 12444 | Lias         | -2.01 | 47 | 8.22  | 37 | 4.1   |   |
| 12445 | Lin52        | -2.01 | 6  | 3.69  | 6  | 1.84  |   |
| 12446 | Lipe         | -2.01 | 51 | 2.64  | 46 | 1.32  |   |
| 12447 | LOC100362333 | -2.01 | 0  | 2.48  | 0  | 1.24  |   |
| 12448 | LOC100362339 | -2.01 | 0  | 4.37  | 0  | 2.18  |   |
| 12449 | LOC100365839 | -2.01 | 0  | 1.26  | 0  | 0.63  |   |
| 12450 | LOC100912866 | -2.01 | 13 | 1.65  | 28 | 0.82  |   |
| 12451 | LOC102554393 | -2.01 | 13 | 0.25  | 20 | 0.12  |   |
| 12452 | LOC685619    | -2.01 | 12 | 8.42  | 11 | 4.2   |   |
| 12453 | LOC690617    | -2.01 | 86 | 8.46  | 75 | 4.22  |   |
| 12454 | Lrrc46       | -2.01 | 4  | 0.86  | 2  | 0.43  |   |
| 12455 | Mecr         | -2.01 | 33 | 5.01  | 25 | 2.49  |   |
| 12456 | Mgat4a       | -2.01 | 26 | 0.76  | 24 | 0.38  |   |
| 12457 | Mien1        | -2.01 | 45 | 26.03 | 31 | 12.98 |   |

Supplemental Table 3  
 FSH + Ad-E versus FSH + Ad-FOXO1(A3), 24 hours

|       | A              | B     | C   | D     | E   | F     | G |
|-------|----------------|-------|-----|-------|-----|-------|---|
| 12458 | Mmachc         | -2.01 | 19  | 2.83  | 15  | 1.41  |   |
| 12459 | Mok            | -2.01 | 26  | 1.33  | 28  | 0.66  |   |
| 12460 | Msra           | -2.01 | 27  | 3.12  | 39  | 1.55  |   |
| 12461 | Myo15b         | -2.01 | 8   | 0.1   | 7   | 0.05  |   |
| 12462 | Nek2           | -2.01 | 5   | 2.45  | 4   | 1.22  |   |
| 12463 | Nfkbil1        | -2.01 | 6   | 1.29  | 3   | 0.64  |   |
| 12464 | Nlrp14         | -2.01 | 8   | 0.69  | 4   | 0.34  |   |
| 12465 | Nova2          | -2.01 | 19  | 2.94  | 11  | 1.47  |   |
| 12466 | Nptxr          | -2.01 | 14  | 0.9   | 9   | 0.45  |   |
| 12467 | Ntn3           | -2.01 | 4   | 0.45  | 2   | 0.22  |   |
| 12468 | Nudt5          | -2.01 | 69  | 12.88 | 56  | 6.42  |   |
| 12469 | Nxn1           | -2.01 | 3   | 1.11  | 2   | 0.55  |   |
| 12470 | Oas1e          | -2.01 | 0   | 0.63  | 0   | 0.31  |   |
| 12471 | Ogfod2         | -2.01 | 19  | 3.96  | 14  | 1.97  |   |
| 12472 | Ogfrl1         | -2.01 | 6   | 1.27  | 5   | 0.64  |   |
| 12473 | Pcdh8          | -2.01 | 6   | 0.68  | 4   | 0.34  |   |
| 12474 | Pik3ap1        | -2.01 | 7   | 0.24  | 12  | 0.12  |   |
| 12475 | Prkcb          | -2.01 | 131 | 3.83  | 84  | 1.91  |   |
| 12476 | Psmg3          | -2.01 | 55  | 21.92 | 36  | 10.92 |   |
| 12477 | Rab6b          | -2.01 | 10  | 0.46  | 7   | 0.23  |   |
| 12478 | RGD1563620     | -2.01 | 1   | 0.85  | 0   | 0.42  |   |
| 12479 | Rpl38_2        | -2.01 | 0   | 5.1   | 0   | 2.54  |   |
| 12480 | Rpp25l         | -2.01 | 16  | 7.15  | 14  | 3.56  |   |
| 12481 | Rtn4ip1        | -2.01 | 49  | 4.35  | 50  | 2.17  |   |
| 12482 | S100a1         | -2.01 | 6   | 3.81  | 4   | 1.9   |   |
| 12483 | Sfxn5          | -2.01 | 12  | 0.86  | 13  | 0.43  |   |
| 12484 | Sh3pxd2b       | -2.01 | 10  | 0.79  | 7   | 0.39  |   |
| 12485 | Shbg           | -2.01 | 3   | 0.72  | 4   | 0.36  |   |
| 12486 | Slc16a6        | -2.01 | 10  | 0.86  | 7   | 0.43  |   |
| 12487 | Smpd3          | -2.01 | 4   | 0.22  | 4   | 0.11  |   |
| 12488 | SNORA42_12     | -2.01 | 3   | 8.11  | 1   | 4.04  |   |
| 12489 | Sox13          | -2.01 | 15  | 1.06  | 14  | 0.53  |   |
| 12490 | Sparcl1        | -2.01 | 16  | 1.19  | 11  | 0.59  |   |
| 12491 | Tmem132c       | -2.01 | 34  | 2.02  | 19  | 1.01  |   |
| 12492 | Tmem204        | -2.01 | 2   | 0.61  | 2   | 0.31  |   |
| 12493 | Tnfrsf4        | -2.01 | 4   | 1.07  | 3   | 0.53  |   |
| 12494 | Tph1           | -2.01 | 3   | 0.28  | 3   | 0.14  |   |
| 12495 | Trmt61a        | -2.01 | 116 | 5.33  | 126 | 2.66  |   |
| 12496 | Tsx            | -2.01 | 6   | 1.37  | 3   | 0.68  |   |
| 12497 | Upk1b          | -2.01 | 7   | 0.59  | 2   | 0.29  |   |
| 12498 | Wdr62_2        | -2.01 | 0   | 0.64  | 0   | 0.32  |   |
| 12499 | Wdr83          | -2.01 | 36  | 8.29  | 31  | 4.13  |   |
| 12500 | Xkr6           | -2.01 | 55  | 0.78  | 74  | 0.39  |   |
| 12501 | Zfp383_2       | -2.01 | 0   | 0.42  | 0   | 0.21  |   |
| 12502 | Zfp438         | -2.01 | 14  | 0.62  | 14  | 0.31  |   |
| 12503 | Zfp667         | -2.01 | 14  | 0.96  | 9   | 0.48  |   |
| 12504 | Zfp879         | -2.01 | 10  | 1.38  | 9   | 0.69  |   |
| 12505 | Zfp94_2        | -2.01 | 9   | 1.45  | 6   | 0.72  |   |
| 12506 | Akr1b1-ps2     | -2.01 | 2   | 1.15  | 2   | 0.57  |   |
| 12507 | Clybl          | -2.01 | 49  | 4.38  | 49  | 2.18  |   |
| 12508 | LOC100910318_2 | -2.01 | 0   | 2.57  | 0   | 1.28  |   |
| 12509 | Pdzd7          | -2.01 | 14  | 0.56  | 14  | 0.28  |   |
| 12510 | RGD1560789     | -2.01 | 0   | 1.34  | 0   | 0.67  |   |
| 12511 | Naga           | -2.01 | 207 | 34.21 | 141 | 17.01 |   |



Supplemental Table 3  
 FSH + Ad-E versus FSH + Ad-FOXO1(A3), 24 hours

|       | A            | B     | C   | D      | E   | F      | G |
|-------|--------------|-------|-----|--------|-----|--------|---|
| 12512 | RGD1359127   | -2.02 | 101 | 22.64  | 68  | 11.23  |   |
| 12513 | Rap2b        | -2.02 | 70  | 46.57  | 45  | 23.05  |   |
| 12514 | Ndufs7       | -2.02 | 80  | 22.88  | 72  | 11.31  |   |
| 12515 | Parl         | -2.02 | 55  | 16.18  | 37  | 8      |   |
| 12516 | Pcdh10       | -2.02 | 177 | 18.82  | 131 | 9.3    |   |
| 12517 | LOC686442    | -2.03 | 172 | 115.46 | 110 | 57.02  |   |
| 12518 | Phactr1      | -2.03 | 113 | 13.64  | 89  | 6.72   |   |
| 12519 | Gramd1b      | -2.03 | 311 | 21.99  | 225 | 10.84  |   |
| 12520 | Snrpn        | -2.03 | 5   | 9.53   | 2   | 4.69   |   |
| 12521 | Sobp         | -2.04 | 98  | 4.88   | 115 | 2.4    |   |
| 12522 | Lsm10        | -2.04 | 40  | 12.79  | 26  | 6.27   |   |
| 12523 | Pex16        | -2.04 | 36  | 7.47   | 25  | 3.66   |   |
| 12524 | Mri1         | -2.05 | 29  | 5.03   | 30  | 2.46   |   |
| 12525 | Ogg1         | -2.05 | 33  | 6.21   | 23  | 3.04   |   |
| 12526 | Pgap3        | -2.05 | 30  | 3.9    | 21  | 1.91   |   |
| 12527 | Rab3a        | -2.05 | 18  | 6.84   | 14  | 3.34   |   |
| 12528 | Wdr73        | -2.05 | 31  | 6.22   | 21  | 3.04   |   |
| 12529 | ldh3g        | -2.05 | 213 | 54.38  | 151 | 26.57  |   |
| 12530 | Cerk         | -2.05 | 180 | 14.25  | 119 | 6.96   |   |
| 12531 | Nr5a1        | -2.05 | 863 | 124.12 | 626 | 60.54  |   |
| 12532 | Nbeal2       | -2.05 | 50  | 1.92   | 32  | 0.93   |   |
| 12533 | Csdc2        | -2.05 | 379 | 46.38  | 275 | 22.6   |   |
| 12534 | Smoc2        | -2.05 | 106 | 10.33  | 73  | 5.03   |   |
| 12535 | Bcam         | -2.06 | 237 | 34.61  | 154 | 16.84  |   |
| 12536 | Emp3         | -2.06 | 966 | 454.95 | 651 | 221.31 |   |
| 12537 | Zfp617       | -2.06 | 20  | 4.88   | 15  | 2.37   |   |
| 12538 | Cfp          | -2.06 | 53  | 4.9    | 35  | 2.38   |   |
| 12539 | Kitlg        | -2.06 | 25  | 1.35   | 16  | 0.66   |   |
| 12540 | Gsr          | -2.06 | 239 | 35.31  | 197 | 17.15  |   |
| 12541 | Tmem189      | -2.06 | 275 | 53.2   | 205 | 25.81  |   |
| 12542 | l7Rn6        | -2.06 | 48  | 8.63   | 56  | 4.18   |   |
| 12543 | Bst2         | -2.06 | 451 | 190.77 | 293 | 92.49  |   |
| 12544 | LOC102553763 | -2.07 | 104 | 18.09  | 68  | 8.76   |   |
| 12545 | Gins4        | -2.07 | 26  | 5.83   | 25  | 2.82   |   |
| 12546 | Rbmxl1b      | -2.07 | 43  | 15.1   | 25  | 7.3    |   |
| 12547 | Tmem17       | -2.07 | 36  | 5.5    | 22  | 2.66   |   |
| 12548 | LOC100910577 | -2.07 | 12  | 3.54   | 10  | 1.71   |   |
| 12549 | Rnf150       | -2.07 | 72  | 4.34   | 76  | 2.1    |   |
| 12550 | Fkbp5        | -2.07 | 726 | 71.94  | 480 | 34.77  |   |
| 12551 | Mrap         | -2.07 | 107 | 35.51  | 95  | 17.16  |   |
| 12552 | Mrpl22       | -2.07 | 82  | 28.22  | 72  | 13.63  |   |
| 12553 | Churc1       | -2.07 | 90  | 36.9   | 102 | 17.82  |   |
| 12554 | Got1         | -2.07 | 136 | 19.93  | 93  | 9.62   |   |
| 12555 | F8a1         | -2.07 | 31  | 7.41   | 20  | 3.57   |   |
| 12556 | Polr2f       | -2.08 | 45  | 25.99  | 29  | 12.52  |   |
| 12557 | Pqlc1        | -2.08 | 420 | 69.96  | 310 | 33.71  |   |
| 12558 | Ppp2r3b      | -2.08 | 70  | 9.37   | 51  | 4.51   |   |
| 12559 | Nr2f2        | -2.08 | 183 | 22.22  | 133 | 10.69  |   |
| 12560 | Herpud1      | -2.08 | 392 | 76.07  | 256 | 36.59  |   |
| 12561 | Cyb5d1       | -2.08 | 17  | 7.38   | 12  | 3.55   |   |
| 12562 | Irs3         | -2.08 | 14  | 2.57   | 11  | 1.24   |   |
| 12563 | LOC679739    | -2.08 | 0   | 7.93   | 0   | 3.81   |   |
| 12564 | Tmem261      | -2.08 | 42  | 17.44  | 27  | 8.38   |   |
| 12565 | Pyroxd2      | -2.08 | 122 | 12.32  | 96  | 5.91   |   |

Supplemental Table 3  
 FSH + Ad-E versus FSH + Ad-FOXO1(A3), 24 hours

|       | A            | B     | C    | D      | E    | F      | G |
|-------|--------------|-------|------|--------|------|--------|---|
| 12566 | Rplp0        | -2.08 | 2312 | 817.22 | 1492 | 392.04 |   |
| 12567 | Cbfa2t3      | -2.09 | 147  | 12.8   | 93   | 6.13   |   |
| 12568 | Nlr1         | -2.09 | 33   | 3.1    | 21   | 1.49   |   |
| 12569 | Psmb9        | -2.09 | 25   | 9.87   | 16   | 4.72   |   |
| 12570 | Tspan15      | -2.09 | 37   | 10.3   | 35   | 4.93   |   |
| 12571 | Uqcr10_1     | -2.09 | 121  | 107.74 | 77   | 51.5   |   |
| 12572 | Dolpp1       | -2.09 | 40   | 5.62   | 26   | 2.69   |   |
| 12573 | Mvd          | -2.1  | 99   | 20.06  | 64   | 9.57   |   |
| 12574 | Abcc4        | -2.1  | 141  | 8.48   | 89   | 4.05   |   |
| 12575 | Gapdh        | -2.1  | 38   | 281.49 | 21   | 134.27 |   |
| 12576 | Anks6        | -2.1  | 79   | 3.35   | 77   | 1.6    |   |
| 12577 | Areg         | -2.1  | 13   | 3.49   | 8    | 1.66   |   |
| 12578 | Matn2        | -2.1  | 158  | 4.57   | 192  | 2.17   |   |
| 12579 | Yme1l1       | -2.1  | 0    | 1.85   | 0    | 0.88   |   |
| 12580 | Zcchc10      | -2.1  | 20   | 4.12   | 22   | 1.96   |   |
| 12581 | Ankrd9       | -2.1  | 11   | 2.74   | 7    | 1.3    |   |
| 12582 | Bphl         | -2.1  | 45   | 6.74   | 46   | 3.21   |   |
| 12583 | Dnah1        | -2.1  | 14   | 0.29   | 11   | 0.14   |   |
| 12584 | Efhc1        | -2.1  | 20   | 1.8    | 15   | 0.86   |   |
| 12585 | Wars2        | -2.1  | 37   | 4.03   | 34   | 1.92   |   |
| 12586 | Asna1        | -2.1  | 203  | 49.42  | 146  | 23.49  |   |
| 12587 | Cdh24        | -2.11 | 55   | 6.33   | 30   | 3      |   |
| 12588 | Isoc2b       | -2.11 | 81   | 14.22  | 67   | 6.74   |   |
| 12589 | Mgst2        | -2.11 | 102  | 66.95  | 82   | 31.72  |   |
| 12590 | LOC100910370 | -2.11 | 0    | 14.03  | 0    | 6.64   |   |
| 12591 | Tsen34_2     | -2.11 | 0    | 8.08   | 1    | 3.83   |   |
| 12592 | LOC100912481 | -2.11 | 11   | 67.47  | 2    | 31.94  |   |
| 12593 | Fndc4        | -2.12 | 19   | 4.84   | 12   | 2.29   |   |
| 12594 | Ammecr1      | -2.12 | 70   | 13.69  | 66   | 6.46   |   |
| 12595 | Gnb5         | -2.12 | 31   | 6.51   | 25   | 3.08   |   |
| 12596 | Etnk2        | -2.12 | 388  | 53.06  | 256  | 25.04  |   |
| 12597 | Star         | -2.12 | 310  | 90.05  | 195  | 42.46  |   |
| 12598 | Slc44a2      | -2.12 | 255  | 24.86  | 169  | 11.7   |   |
| 12599 | Tmem180      | -2.12 | 40   | 4.43   | 33   | 2.09   |   |
| 12600 | Mib2         | -2.13 | 159  | 12.58  | 111  | 5.91   |   |
| 12601 | Pex10        | -2.13 | 36   | 7.46   | 26   | 3.51   |   |
| 12602 | Ccne1        | -2.14 | 26   | 4.45   | 19   | 2.08   |   |
| 12603 | Cenph        | -2.14 | 24   | 4.61   | 17   | 2.15   |   |
| 12604 | LOC102551435 | -2.14 | 12   | 2.52   | 13   | 1.18   |   |
| 12605 | Ccdc28b      | -2.14 | 21   | 4.71   | 14   | 2.2    |   |
| 12606 | Efr3b        | -2.14 | 10   | 0.74   | 9    | 0.35   |   |
| 12607 | Fmc1         | -2.14 | 18   | 4.34   | 12   | 2.03   |   |
| 12608 | Pomgnt2      | -2.14 | 64   | 10.91  | 40   | 5.1    |   |
| 12609 | Sod3         | -2.14 | 16   | 3.35   | 10   | 1.57   |   |
| 12610 | Syn2         | -2.14 | 28   | 1.1    | 25   | 0.51   |   |
| 12611 | Rab4b        | -2.14 | 208  | 57.59  | 150  | 26.85  |   |
| 12612 | Wdr90        | -2.15 | 125  | 6.76   | 84   | 3.15   |   |
| 12613 | Prkar2b      | -2.15 | 2893 | 262.47 | 1823 | 122.09 |   |
| 12614 | Dhcr7        | -2.15 | 782  | 95.49  | 503  | 44.41  |   |
| 12615 | Adgrg1       | -2.15 | 6393 | 585.93 | 4050 | 272.13 |   |
| 12616 | Tysnd1       | -2.15 | 36   | 4.54   | 23   | 2.11   |   |
| 12617 | Tubb3        | -2.16 | 457  | 90.52  | 301  | 41.94  |   |
| 12618 | Rps29_2      | -2.16 | 100  | 349.01 | 58   | 161.53 |   |
| 12619 | Cbln1        | -2.16 | 88   | 12.44  | 52   | 5.76   |   |

Supplemental Table 3  
 FSH + Ad-E versus FSH + Ad-FOXO1(A3), 24 hours

|       | A              | B     | C   | D      | E   | F      | G |
|-------|----------------|-------|-----|--------|-----|--------|---|
| 12620 | LOC103690024   | -2.17 | 3   | 22.51  | 0   | 10.4   |   |
| 12621 | Mpv17          | -2.17 | 72  | 24.28  | 100 | 11.21  |   |
| 12622 | Tulp3          | -2.17 | 363 | 83.3   | 247 | 38.43  |   |
| 12623 | Ddt            | -2.17 | 176 | 99.45  | 113 | 45.86  |   |
| 12624 | Pex6           | -2.17 | 95  | 6.64   | 63  | 3.06   |   |
| 12625 | Abcc9          | -2.17 | 31  | 1.31   | 23  | 0.6    |   |
| 12626 | Ankrd13d       | -2.17 | 20  | 1.93   | 16  | 0.89   |   |
| 12627 | LOC100911918   | -2.17 | 15  | 2.69   | 23  | 1.24   |   |
| 12628 | Polg2          | -2.17 | 18  | 2.51   | 20  | 1.16   |   |
| 12629 | Trip13         | -2.17 | 41  | 3.49   | 23  | 1.61   |   |
| 12630 | Trib2          | -2.18 | 914 | 107.08 | 602 | 49.23  |   |
| 12631 | Tmtc2          | -2.18 | 670 | 41.14  | 421 | 18.89  |   |
| 12632 | Fntb           | -2.18 | 132 | 14.14  | 103 | 6.49   |   |
| 12633 | Id2            | -2.18 | 633 | 112.51 | 484 | 51.59  |   |
| 12634 | Jag2           | -2.18 | 34  | 2.48   | 21  | 1.14   |   |
| 12635 | Igdcc4         | -2.19 | 320 | 25.33  | 196 | 11.58  |   |
| 12636 | Cdc25b         | -2.19 | 21  | 2.33   | 13  | 1.07   |   |
| 12637 | LOC100158225   | -2.19 | 20  | 2.98   | 16  | 1.36   |   |
| 12638 | Amigo2         | -2.19 | 18  | 2.11   | 11  | 0.96   |   |
| 12639 | Cox6a1         | -2.19 | 167 | 237.42 | 55  | 108.47 |   |
| 12640 | Proser2        | -2.19 | 24  | 1.42   | 17  | 0.65   |   |
| 12641 | Slc26a11       | -2.19 | 56  | 7.33   | 34  | 3.35   |   |
| 12642 | Zfand4         | -2.19 | 38  | 2.45   | 37  | 1.12   |   |
| 12643 | Slc2a1         | -2.19 | 181 | 23.33  | 112 | 10.65  |   |
| 12644 | Fam20b         | -2.19 | 55  | 9.39   | 42  | 4.29   |   |
| 12645 | Slc39a11       | -2.19 | 130 | 6.67   | 129 | 3.04   |   |
| 12646 | Tspo           | -2.19 | 135 | 55.24  | 86  | 25.17  |   |
| 12647 | Melk           | -2.2  | 38  | 3.57   | 24  | 1.62   |   |
| 12648 | RGD1304567     | -2.21 | 49  | 12.49  | 30  | 5.65   |   |
| 12649 | Abhd8          | -2.21 | 179 | 30.28  | 108 | 13.69  |   |
| 12650 | Tmem8a         | -2.21 | 48  | 3.48   | 32  | 1.57   |   |
| 12651 | Slc25a1        | -2.21 | 520 | 108.73 | 315 | 49.09  |   |
| 12652 | Ybx1-ps3       | -2.22 | 12  | 22.46  | 9   | 10.11  |   |
| 12653 | Fzr1           | -2.22 | 117 | 20.8   | 70  | 9.36   |   |
| 12654 | Atp1b1         | -2.22 | 360 | 45.67  | 219 | 20.53  |   |
| 12655 | Grem2          | -2.23 | 767 | 65.62  | 493 | 29.48  |   |
| 12656 | AABR07002969.1 | -2.23 | 21  | 11.04  | 20  | 4.95   |   |
| 12657 | Dph6           | -2.23 | 23  | 2.24   | 17  | 1.01   |   |
| 12658 | Dusp28         | -2.23 | 5   | 1.08   | 3   | 0.48   |   |
| 12659 | Efnb3          | -2.23 | 5   | 0.58   | 4   | 0.26   |   |
| 12660 | Lingo1         | -2.23 | 6   | 0.74   | 3   | 0.33   |   |
| 12661 | LOC100362384   | -2.23 | 2   | 6.52   | 0   | 2.93   |   |
| 12662 | Lrrc10b        | -2.23 | 5   | 1.47   | 3   | 0.66   |   |
| 12663 | Muc4           | -2.23 | 7   | 0.27   | 4   | 0.12   |   |
| 12664 | Pcdhb11        | -2.23 | 4   | 0.78   | 3   | 0.35   |   |
| 12665 | Pcsk4          | -2.23 | 19  | 0.74   | 10  | 0.33   |   |
| 12666 | RGD1564469     | -2.23 | 5   | 2.16   | 2   | 0.97   |   |
| 12667 | RGD1566085     | -2.23 | 13  | 1.89   | 10  | 0.85   |   |
| 12668 | Rilp           | -2.23 | 8   | 1.64   | 5   | 0.74   |   |
| 12669 | Sptbn5         | -2.23 | 10  | 0.29   | 11  | 0.13   |   |
| 12670 | 1110034G24Rik  | -2.23 | 42  | 5.38   | 50  | 2.41   |   |
| 12671 | AABR07001064.1 | -2.23 | 1   | 0.65   | 1   | 0.29   |   |
| 12672 | AABR07001634.1 | -2.23 | 16  | 3.7    | 9   | 1.66   |   |
| 12673 | AABR07008940.1 | -2.23 | 0   | 2.13   | 0   | 0.95   |   |

Supplemental Table 3  
 FSH + Ad-E versus FSH + Ad-FOXO1(A3), 24 hours

|       | A              | B     | C   | D     | E   | F     | G |
|-------|----------------|-------|-----|-------|-----|-------|---|
| 12674 | AABR07035065.1 | -2.23 | 4   | 1.17  | 1   | 0.52  |   |
| 12675 | Ablim2         | -2.23 | 29  | 1.78  | 24  | 0.8   |   |
| 12676 | AC117142.1     | -2.23 | 0   | 0.98  | 0   | 0.44  |   |
| 12677 | Ankrd37        | -2.23 | 6   | 2.08  | 4   | 0.93  |   |
| 12678 | Atp6v1c2       | -2.23 | 22  | 1.27  | 30  | 0.57  |   |
| 12679 | AY172581.22    | -2.23 | 5   | 26.24 | 3   | 11.77 |   |
| 12680 | Cadm4          | -2.23 | 5   | 1.26  | 3   | 0.57  |   |
| 12681 | Elovl7         | -2.23 | 6   | 2.02  | 4   | 0.91  |   |
| 12682 | Eppin          | -2.23 | 29  | 1.31  | 46  | 0.59  |   |
| 12683 | Fbxo36         | -2.23 | 33  | 1.64  | 43  | 0.73  |   |
| 12684 | Hprt1_1        | -2.23 | 0   | 2.76  | 0   | 1.24  |   |
| 12685 | Kcns3          | -2.23 | 11  | 0.78  | 6   | 0.35  |   |
| 12686 | LOC102552796   | -2.23 | 15  | 2.25  | 9   | 1.01  |   |
| 12687 | Lrrc29         | -2.23 | 20  | 0.79  | 21  | 0.35  |   |
| 12688 | Lrrn1          | -2.23 | 25  | 2.97  | 15  | 1.33  |   |
| 12689 | Mrps18a        | -2.23 | 30  | 18.16 | 17  | 8.15  |   |
| 12690 | Napepld        | -2.23 | 21  | 1.16  | 13  | 0.52  |   |
| 12691 | Npas2          | -2.23 | 22  | 0.42  | 11  | 0.19  |   |
| 12692 | Padi4          | -2.23 | 152 | 0.8   | 218 | 0.36  |   |
| 12693 | Pianp          | -2.23 | 11  | 1.22  | 7   | 0.55  |   |
| 12694 | Reep6          | -2.23 | 17  | 2.56  | 12  | 1.15  |   |
| 12695 | RGD1561648     | -2.23 | 8   | 0.59  | 5   | 0.26  |   |
| 12696 | Rn60_X_0648.1  | -2.23 | 0   | 1.69  | 0   | 0.76  |   |
| 12697 | Rn60_X_0714.1  | -2.23 | 22  | 1.6   | 16  | 0.72  |   |
| 12698 | Sbsn           | -2.23 | 7   | 0.83  | 9   | 0.37  |   |
| 12699 | Tmem223        | -2.23 | 105 | 50.83 | 65  | 22.8  |   |
| 12700 | Tprkb_2        | -2.23 | 0   | 3.43  | 0   | 1.54  |   |
| 12701 | Wnt6           | -2.23 | 23  | 2.64  | 18  | 1.18  |   |
| 12702 | Zfp383_1       | -2.23 | 0   | 0.64  | 0   | 0.29  |   |
| 12703 | Slc26a2        | -2.24 | 109 | 11.58 | 84  | 5.17  |   |
| 12704 | Kcnh2          | -2.24 | 402 | 27.87 | 217 | 12.43 |   |
| 12705 | Slc27a6        | -2.25 | 56  | 5.63  | 36  | 2.51  |   |
| 12706 | Fut4           | -2.25 | 84  | 7.68  | 50  | 3.42  |   |
| 12707 | Dolk           | -2.25 | 116 | 20.6  | 68  | 9.16  |   |
| 12708 | Nphp4          | -2.25 | 88  | 4.24  | 53  | 1.88  |   |
| 12709 | Mrpl27         | -2.26 | 58  | 25.56 | 33  | 11.31 |   |
| 12710 | Naif1          | -2.26 | 23  | 2.62  | 13  | 1.16  |   |
| 12711 | Crispld2       | -2.27 | 738 | 59.98 | 464 | 26.46 |   |
| 12712 | Arrdc4         | -2.27 | 49  | 3.29  | 27  | 1.45  |   |
| 12713 | Mt1_1          | -2.27 | 0   | 36.3  | 0   | 16    |   |
| 12714 | Reep2          | -2.27 | 41  | 7.43  | 26  | 3.28  |   |
| 12715 | Net1           | -2.27 | 559 | 62.05 | 327 | 27.35 |   |
| 12716 | Rn60_10_0892.1 | -2.27 | 27  | 3.96  | 18  | 1.74  |   |
| 12717 | Ephx2          | -2.27 | 20  | 2.9   | 14  | 1.27  |   |
| 12718 | Tnfaip3        | -2.27 | 17  | 2.52  | 15  | 1.11  |   |
| 12719 | Btbd11         | -2.27 | 270 | 10.78 | 225 | 4.74  |   |
| 12720 | RGD1563986     | -2.27 | 26  | 3.91  | 28  | 1.72  |   |
| 12721 | Zdhhc4         | -2.28 | 61  | 11.95 | 53  | 5.24  |   |
| 12722 | Slc25a30       | -2.28 | 543 | 94.57 | 337 | 41.5  |   |
| 12723 | Naglu          | -2.28 | 143 | 19.59 | 84  | 8.59  |   |
| 12724 | Rpl36          | -2.28 | 26  | 79.7  | 7   | 34.9  |   |
| 12725 | Tspan7         | -2.29 | 108 | 22.54 | 65  | 9.85  |   |
| 12726 | Fbxo16         | -2.29 | 23  | 3.44  | 19  | 1.5   |   |
| 12727 | Gpr19          | -2.29 | 22  | 2.86  | 11  | 1.25  |   |

Supplemental Table 3  
 FSH + Ad-E versus FSH + Ad-FOXO1(A3), 24 hours

|       | A              | B     | C   | D      | E   | F     | G |
|-------|----------------|-------|-----|--------|-----|-------|---|
| 12728 | Nat14          | -2.29 | 13  | 2.86   | 8   | 1.25  |   |
| 12729 | Ppil1          | -2.29 | 62  | 8.72   | 57  | 3.8   |   |
| 12730 | Prelp          | -2.29 | 11  | 1.2    | 6   | 0.52  |   |
| 12731 | Prodh          | -2.29 | 18  | 1.86   | 12  | 0.81  |   |
| 12732 | Tubd1          | -2.29 | 15  | 2.99   | 11  | 1.3   |   |
| 12733 | Ptprv          | -2.29 | 40  | 2.27   | 20  | 0.99  |   |
| 12734 | AABR07064716.2 | -2.31 | 0   | 85.99  | 0   | 37.22 |   |
| 12735 | Btbd8_1        | -2.31 | 8   | 1.68   | 4   | 0.73  |   |
| 12736 | Cyp17a1        | -2.31 | 19  | 3.77   | 11  | 1.63  |   |
| 12737 | Fundc2         | -2.31 | 95  | 19.7   | 66  | 8.53  |   |
| 12738 | Kcnk1          | -2.31 | 21  | 2.7    | 15  | 1.17  |   |
| 12739 | Rad54l         | -2.31 | 29  | 2.46   | 27  | 1.07  |   |
| 12740 | Ssbp4          | -2.31 | 197 | 46.77  | 119 | 20.24 |   |
| 12741 | Zfp952         | -2.31 | 32  | 4.97   | 26  | 2.15  |   |
| 12742 | Ss18l1         | -2.31 | 34  | 5.18   | 29  | 2.24  |   |
| 12743 | Katnal1_1      | -2.32 | 1   | 9.22   | 0   | 3.98  |   |
| 12744 | Mycl           | -2.32 | 52  | 6.4    | 30  | 2.76  |   |
| 12745 | Psmb3          | -2.32 | 342 | 154.67 | 192 | 66.69 |   |
| 12746 | Adck1          | -2.32 | 59  | 5.74   | 49  | 2.47  |   |
| 12747 | Cisd1          | -2.32 | 86  | 32.87  | 69  | 14.15 |   |
| 12748 | Ndufa7         | -2.33 | 168 | 113.05 | 107 | 48.54 |   |
| 12749 | Wnt11          | -2.33 | 176 | 19.07  | 109 | 8.18  |   |
| 12750 | Slc27a1        | -2.34 | 703 | 76.82  | 413 | 32.88 |   |
| 12751 | AABR07028012.1 | -2.34 | 13  | 5.56   | 9   | 2.37  |   |
| 12752 | Bloc1s3        | -2.34 | 7   | 4.31   | 4   | 1.84  |   |
| 12753 | Dmtn           | -2.34 | 7   | 0.75   | 6   | 0.32  |   |
| 12754 | Fanca          | -2.34 | 43  | 2.25   | 30  | 0.96  |   |
| 12755 | Iltga9         | -2.34 | 25  | 1.63   | 22  | 0.7   |   |
| 12756 | Kctd14         | -2.34 | 7   | 1.34   | 4   | 0.57  |   |
| 12757 | LOC100362724   | -2.34 | 0   | 2.43   | 0   | 1.04  |   |
| 12758 | LOC100911365   | -2.34 | 0   | 2.88   | 0   | 1.23  |   |
| 12759 | LOC100912391   | -2.34 | 71  | 8.44   | 66  | 3.61  |   |
| 12760 | Lym9           | -2.34 | 25  | 4.83   | 20  | 2.06  |   |
| 12761 | Ptges3l1       | -2.34 | 7   | 1.58   | 5   | 0.67  |   |
| 12762 | Rnf113a1       | -2.34 | 0   | 2.24   | 0   | 0.96  |   |
| 12763 | AABR07000410.1 | -2.34 | 5   | 0.68   | 4   | 0.29  |   |
| 12764 | AABR07063082.1 | -2.34 | 6   | 1.62   | 2   | 0.69  |   |
| 12765 | AABR07071697.1 | -2.34 | 18  | 5.03   | 11  | 2.15  |   |
| 12766 | Cacna1d        | -2.34 | 20  | 0.26   | 16  | 0.11  |   |
| 12767 | Echdc3         | -2.34 | 17  | 1.77   | 23  | 0.76  |   |
| 12768 | Fam227a        | -2.34 | 18  | 1.1    | 21  | 0.47  |   |
| 12769 | Fgfr3          | -2.34 | 11  | 0.71   | 4   | 0.3   |   |
| 12770 | Gprc5b         | -2.34 | 20  | 0.88   | 16  | 0.38  |   |
| 12771 | Gtpbp6_2       | -2.34 | 0   | 1.64   | 0   | 0.7   |   |
| 12772 | LOC100911721   | -2.34 | 1   | 1.51   | 0   | 0.65  |   |
| 12773 | LOC102556347   | -2.34 | 21  | 18.94  | 8   | 8.09  |   |
| 12774 | LOC497963      | -2.34 | 18  | 0.76   | 12  | 0.32  |   |
| 12775 | Lrrc17         | -2.34 | 13  | 6.14   | 6   | 2.62  |   |
| 12776 | Mif4gd         | -2.34 | 76  | 17.7   | 44  | 7.56  |   |
| 12777 | Nfe2           | -2.34 | 8   | 1.53   | 8   | 0.66  |   |
| 12778 | Nsun3          | -2.34 | 16  | 2.75   | 21  | 1.18  |   |
| 12779 | Nxpe3          | -2.34 | 11  | 0.76   | 10  | 0.32  |   |
| 12780 | Pcdhb19        | -2.34 | 7   | 1.05   | 4   | 0.45  |   |
| 12781 | Rnf157         | -2.34 | 21  | 2.37   | 22  | 1.01  |   |

Supplemental Table 3  
 FSH + Ad-E versus FSH + Ad-FOXO1(A3), 24 hours

|       | A              | B     | C    | D      | E   | F      | G |
|-------|----------------|-------|------|--------|-----|--------|---|
| 12782 | Rpl8           | -2.34 | 0    | 16.37  | 0   | 6.99   |   |
| 12783 | Slc7a11        | -2.34 | 8    | 0.28   | 6   | 0.12   |   |
| 12784 | Slitrk2        | -2.34 | 24   | 2.58   | 13  | 1.1    |   |
| 12785 | Slmo1          | -2.34 | 24   | 1.94   | 18  | 0.83   |   |
| 12786 | Tmem107        | -2.34 | 19   | 4.88   | 13  | 2.09   |   |
| 12787 | Tmem258        | -2.34 | 2    | 17.98  | 1   | 7.68   |   |
| 12788 | Vkorc1         | -2.34 | 86   | 12.75  | 51  | 5.45   |   |
| 12789 | Zfp239         | -2.34 | 7    | 4.18   | 4   | 1.79   |   |
| 12790 | Isoc1          | -2.34 | 179  | 63.18  | 108 | 26.95  |   |
| 12791 | Rpl10a         | -2.35 | 117  | 235.47 | 47  | 100.33 |   |
| 12792 | Slc7a6         | -2.35 | 205  | 16.36  | 135 | 6.97   |   |
| 12793 | Rmnd5b_1       | -2.36 | 0    | 15.82  | 0   | 6.72   |   |
| 12794 | Sphk1          | -2.36 | 45   | 3.54   | 25  | 1.5    |   |
| 12795 | Inhbb          | -2.36 | 720  | 83.23  | 418 | 35.24  |   |
| 12796 | Fads2          | -2.37 | 422  | 103.64 | 257 | 43.82  |   |
| 12797 | Fam210b        | -2.38 | 585  | 104.25 | 383 | 43.87  |   |
| 12798 | Lrrc75b        | -2.38 | 33   | 1.95   | 19  | 0.82   |   |
| 12799 | Lipg           | -2.38 | 38   | 3.15   | 20  | 1.32   |   |
| 12800 | Nxt1           | -2.38 | 41   | 17.42  | 25  | 7.31   |   |
| 12801 | Jund           | -2.39 | 551  | 119.25 | 310 | 49.98  |   |
| 12802 | Sord           | -2.39 | 188  | 23.89  | 108 | 10.01  |   |
| 12803 | Metazoa_SRP_26 | -2.39 | 0    | 71.45  | 1   | 29.88  |   |
| 12804 | Ugt1a8         | -2.39 | 77   | 2.29   | 54  | 0.96   |   |
| 12805 | Tpst2          | -2.4  | 73   | 10.8   | 63  | 4.5    |   |
| 12806 | Fbn2           | -2.4  | 283  | 12.47  | 175 | 5.2    |   |
| 12807 | Epha2          | -2.4  | 414  | 35.72  | 235 | 14.87  |   |
| 12808 | Casq1          | -2.41 | 18   | 1.77   | 7   | 0.73   |   |
| 12809 | Dhrs11         | -2.41 | 47   | 9.27   | 39  | 3.85   |   |
| 12810 | Epcam          | -2.41 | 9    | 2.23   | 6   | 0.93   |   |
| 12811 | Haus2_2        | -2.41 | 3    | 4.31   | 1   | 1.79   |   |
| 12812 | Hjulp          | -2.41 | 51   | 4.56   | 30  | 1.89   |   |
| 12813 | LOC100909732   | -2.41 | 2    | 1.85   | 0   | 0.77   |   |
| 12814 | Mx2            | -2.41 | 26   | 3.34   | 15  | 1.39   |   |
| 12815 | Nhp2_1         | -2.41 | 0    | 9.79   | 0   | 4.06   |   |
| 12816 | Pabpc1l2a      | -2.41 | 27   | 15.49  | 15  | 6.43   |   |
| 12817 | Pcdhb5         | -2.41 | 6    | 1.26   | 4   | 0.52   |   |
| 12818 | Ppapdc1a       | -2.41 | 19   | 2.62   | 20  | 1.09   |   |
| 12819 | Ppp1r35        | -2.41 | 0    | 2.74   | 0   | 1.14   |   |
| 12820 | RGD1562652     | -2.41 | 14   | 2.88   | 13  | 1.2    |   |
| 12821 | Rn60_X_0652.2  | -2.41 | 9    | 4.93   | 5   | 2.05   |   |
| 12822 | Swsap1         | -2.41 | 18   | 2.8    | 10  | 1.16   |   |
| 12823 | Ten1           | -2.41 | 14   | 3.73   | 10  | 1.55   |   |
| 12824 | Acan           | -2.41 | 11   | 0.47   | 6   | 0.2    |   |
| 12825 | Csmd2          | -2.41 | 28   | 0.31   | 41  | 0.13   |   |
| 12826 | Ldoc1l         | -2.41 | 45   | 22.26  | 24  | 9.24   |   |
| 12827 | Mtcp1_2        | -2.41 | 9    | 11.68  | 5   | 4.85   |   |
| 12828 | Pdxk           | -2.41 | 45   | 12.84  | 27  | 5.33   |   |
| 12829 | Rps27          | -2.41 | 271  | 362.07 | 169 | 150.38 |   |
| 12830 | Spata18        | -2.41 | 11   | 1.55   | 6   | 0.64   |   |
| 12831 | Alas1          | -2.41 | 1262 | 200.34 | 703 | 83.04  |   |
| 12832 | Nol4l          | -2.41 | 101  | 22.36  | 68  | 9.26   |   |
| 12833 | H2afz          | -2.42 | 39   | 153.69 | 20  | 63.44  |   |
| 12834 | Trpv4          | -2.42 | 35   | 3.27   | 19  | 1.35   |   |
| 12835 | Hadh           | -2.43 | 187  | 38.85  | 117 | 15.99  |   |

Supplemental Table 3  
 FSH + Ad-E versus FSH + Ad-FOXO1(A3), 24 hours

|       | A              | B     | C   | D     | E   | F      | G |
|-------|----------------|-------|-----|-------|-----|--------|---|
| 12836 | Pde4d          | -2.43 | 176 | 12.04 | 165 | 4.95   |   |
| 12837 | Rims4          | -2.43 | 28  | 7.38  | 21  | 3.04   |   |
| 12838 | AABR07048064.1 | -2.44 | 11  | 5.85  | 8   | 2.4    |   |
| 12839 | Bckdha         | -2.44 | 265 | 43.92 | 167 | 17.99  |   |
| 12840 | Gamt           | -2.44 | 151 | 36.88 | 89  | 15.09  |   |
| 12841 | Gldn           | -2.45 | 78  | 9.72  | 41  | 3.98   |   |
| 12842 | Ccdc142        | -2.45 | 0   | 1.84  | 0   | 0.75   |   |
| 12843 | Ccdc92         | -2.45 | 25  | 4.08  | 15  | 1.66   |   |
| 12844 | Ccpg1os        | -2.45 | 11  | 5.4   | 6   | 2.2    |   |
| 12845 | Cotl1          | -2.45 | 28  | 4.96  | 14  | 2.02   |   |
| 12846 | Gsap           | -2.45 | 18  | 1.06  | 13  | 0.43   |   |
| 12847 | Kcnab3         | -2.45 | 12  | 1.89  | 8   | 0.77   |   |
| 12848 | Oasl           | -2.45 | 14  | 1.45  | 8   | 0.59   |   |
| 12849 | Tmem167b       | -2.45 | 8   | 6.18  | 5   | 2.52   |   |
| 12850 | Efcab6         | -2.45 | 21  | 0.84  | 16  | 0.34   |   |
| 12851 | Gpr162         | -2.45 | 18  | 1.39  | 10  | 0.57   |   |
| 12852 | Man1c1         | -2.45 | 19  | 0.96  | 12  | 0.39   |   |
| 12853 | Med18          | -2.45 | 28  | 12.77 | 24  | 5.21   |   |
| 12854 | Padi6          | -2.45 | 11  | 1.94  | 8   | 0.79   |   |
| 12855 | Map2k6         | -2.46 | 100 | 5.97  | 58  | 2.42   |   |
| 12856 | Aldh2          | -2.47 | 528 | 93.22 | 294 | 37.8   |   |
| 12857 | Cebpa          | -2.47 | 200 | 27.23 | 108 | 11.04  |   |
| 12858 | Alkbh6_1       | -2.47 | 0   | 9.33  | 0   | 3.78   |   |
| 12859 | Il17re         | -2.47 | 26  | 2.82  | 19  | 1.14   |   |
| 12860 | Mmd            | -2.47 | 57  | 5.98  | 30  | 2.42   |   |
| 12861 | Ednrb          | -2.48 | 731 | 99.14 | 404 | 40.05  |   |
| 12862 | Phgdh          | -2.48 | 111 | 20.48 | 59  | 8.26   |   |
| 12863 | AABR07065498.1 | -2.48 | 26  | 3.64  | 24  | 1.47   |   |
| 12864 | Acot3          | -2.48 | 29  | 3.65  | 20  | 1.47   |   |
| 12865 | Trim62         | -2.48 | 96  | 13.18 | 74  | 5.31   |   |
| 12866 | Hmgb3_2        | -2.48 | 3   | 5.83  | 2   | 2.35   |   |
| 12867 | Rcor2          | -2.48 | 0   | 1.88  | 0   | 0.76   |   |
| 12868 | Setbp1         | -2.48 | 30  | 1.18  | 24  | 0.47   |   |
| 12869 | Slc41a3        | -2.49 | 210 | 21.92 | 122 | 8.82   |   |
| 12870 | Serf2          | -2.49 | 326 | 483.2 | 161 | 194.14 |   |
| 12871 | Ccdc134        | -2.5  | 55  | 10.08 | 32  | 4.03   |   |
| 12872 | Flvcr2         | -2.5  | 203 | 16.59 | 104 | 6.63   |   |
| 12873 | Extl2          | -2.5  | 77  | 11.5  | 48  | 4.59   |   |
| 12874 | Fam89b         | -2.51 | 239 | 71.81 | 126 | 28.66  |   |
| 12875 | AABR07069282.1 | -2.51 | 10  | 1.74  | 3   | 0.69   |   |
| 12876 | Notch3         | -2.51 | 15  | 0.74  | 10  | 0.3    |   |
| 12877 | Shf            | -2.51 | 51  | 6.45  | 37  | 2.57   |   |
| 12878 | lhh            | -2.51 | 48  | 7.49  | 26  | 2.98   |   |
| 12879 | AABR07063544.1 | -2.52 | 7   | 23.54 | 5   | 9.36   |   |
| 12880 | Them4          | -2.52 | 37  | 4.11  | 22  | 1.63   |   |
| 12881 | Rmdn2          | -2.52 | 174 | 11.48 | 84  | 4.55   |   |
| 12882 | B3gnt7         | -2.53 | 263 | 37.07 | 142 | 14.66  |   |
| 12883 | Tox            | -2.53 | 401 | 18.61 | 237 | 7.35   |   |
| 12884 | Fam46c         | -2.54 | 120 | 19.69 | 67  | 7.76   |   |
| 12885 | Rpl39_2        | -2.54 | 0   | 21.23 | 0   | 8.35   |   |
| 12886 | Taf1a          | -2.54 | 24  | 5.06  | 18  | 1.99   |   |
| 12887 | Cdc20          | -2.55 | 61  | 12.45 | 33  | 4.88   |   |
| 12888 | Ulk4           | -2.55 | 43  | 2.03  | 33  | 0.79   |   |
| 12889 | Tmem177        | -2.55 | 21  | 5.26  | 12  | 2.06   |   |

Supplemental Table 3  
 FSH + Ad-E versus FSH + Ad-FOXO1(A3), 24 hours

|       | A              | B     | C    | D      | E    | F      | G |
|-------|----------------|-------|------|--------|------|--------|---|
| 12890 | Isyna1         | -2.56 | 3424 | 615.35 | 1805 | 240.74 |   |
| 12891 | Pigc           | -2.56 | 0    | 5.29   | 1    | 2.06   |   |
| 12892 | Fdx1           | -2.57 | 241  | 61.1   | 160  | 23.77  |   |
| 12893 | Aldh3b1        | -2.57 | 13   | 4.1    | 5    | 1.59   |   |
| 12894 | Mpp2           | -2.57 | 36   | 3.77   | 14   | 1.47   |   |
| 12895 | Tmem86a        | -2.58 | 193  | 37.79  | 101  | 14.65  |   |
| 12896 | Bloc1s4        | -2.59 | 31   | 8.59   | 16   | 3.32   |   |
| 12897 | Raet1c         | -2.6  | 33   | 10.08  | 15   | 3.88   |   |
| 12898 | Slc19a1        | -2.6  | 39   | 4.8    | 24   | 1.85   |   |
| 12899 | Plxnc1         | -2.6  | 1297 | 84.67  | 669  | 32.54  |   |
| 12900 | Srcin1         | -2.6  | 242  | 5.6    | 104  | 2.15   |   |
| 12901 | Rnasek         | -2.61 | 28   | 49.26  | 13   | 18.87  |   |
| 12902 | LOC100911130   | -2.63 | 0    | 36.97  | 0    | 14.08  |   |
| 12903 | Tkfc           | -2.63 | 57   | 8.41   | 32   | 3.2    |   |
| 12904 | Tmem259        | -2.63 | 141  | 28.81  | 65   | 10.95  |   |
| 12905 | Acaa2          | -2.64 | 150  | 29.78  | 75   | 11.3   |   |
| 12906 | Slc25a10       | -2.64 | 80   | 13.79  | 39   | 5.23   |   |
| 12907 | Hsd17b1        | -2.64 | 174  | 42.81  | 85   | 16.19  |   |
| 12908 | Enc1           | -2.65 | 271  | 20.72  | 143  | 7.8    |   |
| 12909 | Btd            | -2.66 | 230  | 34.88  | 162  | 13.11  |   |
| 12910 | AABR07025023.1 | -2.68 | 2    | 0.55   | 1    | 0.21   |   |
| 12911 | AABR07051190.1 | -2.68 | 2    | 0.54   | 1    | 0.2    |   |
| 12912 | AABR07057150.1 | -2.68 | 0    | 1.13   | 0    | 0.42   |   |
| 12913 | Ccdc114        | -2.68 | 20   | 0.84   | 10   | 0.31   |   |
| 12914 | Cga            | -2.68 | 7    | 2.16   | 3    | 0.81   |   |
| 12915 | Kif17          | -2.68 | 13   | 0.78   | 7    | 0.29   |   |
| 12916 | LOC100910807   | -2.68 | 1    | 0.28   | 1    | 0.11   |   |
| 12917 | LOC100910965   | -2.68 | 0    | 1.35   | 0    | 0.5    |   |
| 12918 | Prkch          | -2.68 | 18   | 0.71   | 15   | 0.26   |   |
| 12919 | Prrg2          | -2.68 | 2    | 0.51   | 1    | 0.19   |   |
| 12920 | Sybu           | -2.68 | 9    | 0.7    | 16   | 0.26   |   |
| 12921 | Xrcc3          | -2.68 | 41   | 2.76   | 75   | 1.03   |   |
| 12922 | 1810024B03Rik  | -2.68 | 2    | 0.35   | 1    | 0.13   |   |
| 12923 | 5_8S_rRNA_4    | -2.68 | 2    | 4.7    | 0    | 1.76   |   |
| 12924 | AABR07002683.1 | -2.68 | 12   | 6.04   | 5    | 2.26   |   |
| 12925 | AABR07015608.1 | -2.68 | 0    | 6.41   | 0    | 2.4    |   |
| 12926 | AABR07015719.1 | -2.68 | 0    | 3.13   | 0    | 1.17   |   |
| 12927 | AABR07017110.1 | -2.68 | 0    | 1.6    | 0    | 0.6    |   |
| 12928 | AABR07021023.1 | -2.68 | 2    | 2.24   | 7    | 0.84   |   |
| 12929 | AABR07021501.1 | -2.68 | 14   | 4.88   | 16   | 1.82   |   |
| 12930 | AABR07022022.1 | -2.68 | 1    | 0.75   | 0    | 0.28   |   |
| 12931 | AABR07027088.1 | -2.68 | 0    | 1.57   | 0    | 0.59   |   |
| 12932 | AABR07030919.1 | -2.68 | 2    | 1.78   | 3    | 0.67   |   |
| 12933 | AABR07035008.1 | -2.68 | 4    | 0.31   | 7    | 0.12   |   |
| 12934 | AABR07035412.2 | -2.68 | 9    | 0.71   | 5    | 0.26   |   |
| 12935 | AABR07043288.1 | -2.68 | 1    | 2.91   | 0    | 1.09   |   |
| 12936 | AABR07043354.1 | -2.68 | 2    | 1.16   | 3    | 0.43   |   |
| 12937 | AABR07044962.1 | -2.68 | 0    | 0.37   | 0    | 0.14   |   |
| 12938 | AABR07052758.1 | -2.68 | 22   | 6.25   | 10   | 2.34   |   |
| 12939 | AABR07053509.1 | -2.68 | 0    | 2.19   | 0    | 0.82   |   |
| 12940 | AABR07053533.1 | -2.68 | 0    | 0.81   | 0    | 0.3    |   |
| 12941 | AABR07053837.1 | -2.68 | 2    | 2.14   | 1    | 0.8    |   |
| 12942 | AABR07056415.1 | -2.68 | 33   | 1.05   | 54   | 0.39   |   |
| 12943 | AABR07062799.2 | -2.68 | 13   | 5.79   | 11   | 2.17   |   |



Supplemental Table 3  
 FSH + Ad-E versus FSH + Ad-FOXO1(A3), 24 hours

|       | A              | B     | C   | D     | E   | F    | G |
|-------|----------------|-------|-----|-------|-----|------|---|
| 12944 | AABR07064349.2 | -2.68 | 0   | 6.83  | 0   | 2.55 |   |
| 12945 | AABR07070238.1 | -2.68 | 3   | 0.87  | 4   | 0.32 |   |
| 12946 | Abca8a         | -2.68 | 3   | 0.13  | 2   | 0.05 |   |
| 12947 | Abcg4          | -2.68 | 2   | 0.37  | 4   | 0.14 |   |
| 12948 | AC097037.2     | -2.68 | 1   | 2.03  | 0   | 0.76 |   |
| 12949 | AC099449.1     | -2.68 | 27  | 1.44  | 29  | 0.54 |   |
| 12950 | AC110351.1     | -2.68 | 0   | 1.81  | 1   | 0.68 |   |
| 12951 | AC117925.6     | -2.68 | 0   | 2.71  | 0   | 1.01 |   |
| 12952 | AC120310.2     | -2.68 | 0   | 0.48  | 0   | 0.18 |   |
| 12953 | AC132752.2     | -2.68 | 6   | 6.9   | 3   | 2.58 |   |
| 12954 | ACEA_U3_6      | -2.68 | 0   | 3.37  | 0   | 1.26 |   |
| 12955 | Ache           | -2.68 | 8   | 0.65  | 4   | 0.24 |   |
| 12956 | Acvrl1         | -2.68 | 2   | 0.2   | 1   | 0.07 |   |
| 12957 | Adcy7          | -2.68 | 8   | 0.52  | 4   | 0.2  |   |
| 12958 | Adra2b         | -2.68 | 2   | 0.18  | 1   | 0.07 |   |
| 12959 | Ahsp           | -2.68 | 3   | 1.3   | 1   | 0.49 |   |
| 12960 | Alox5ap        | -2.68 | 4   | 0.73  | 1   | 0.27 |   |
| 12961 | Ampd1          | -2.68 | 4   | 0.3   | 4   | 0.11 |   |
| 12962 | Arhgap4        | -2.68 | 8   | 0.68  | 6   | 0.25 |   |
| 12963 | Arhgef19       | -2.68 | 3   | 0.2   | 3   | 0.07 |   |
| 12964 | Arhgef9        | -2.68 | 55  | 2.17  | 58  | 0.81 |   |
| 12965 | Asic4          | -2.68 | 9   | 0.83  | 7   | 0.31 |   |
| 12966 | B4galnt4       | -2.68 | 4   | 0.36  | 2   | 0.13 |   |
| 12967 | Bcl11b         | -2.68 | 4   | 0.25  | 7   | 0.09 |   |
| 12968 | Bco2           | -2.68 | 5   | 0.25  | 3   | 0.09 |   |
| 12969 | Blvrb          | -2.68 | 91  | 19.74 | 65  | 7.38 |   |
| 12970 | Bola1          | -2.68 | 10  | 4.85  | 6   | 1.81 |   |
| 12971 | Brinp3         | -2.68 | 14  | 0.24  | 46  | 0.09 |   |
| 12972 | Cacna1a        | -2.68 | 9   | 0.08  | 7   | 0.03 |   |
| 12973 | Capn12         | -2.68 | 5   | 0.25  | 5   | 0.09 |   |
| 12974 | Cbln2          | -2.68 | 2   | 0.31  | 1   | 0.12 |   |
| 12975 | Cbs            | -2.68 | 4   | 0.27  | 3   | 0.1  |   |
| 12976 | Ccdc69         | -2.68 | 18  | 1.51  | 7   | 0.57 |   |
| 12977 | Ccer2          | -2.68 | 3   | 0.88  | 2   | 0.33 |   |
| 12978 | Cdh8           | -2.68 | 10  | 0.13  | 7   | 0.05 |   |
| 12979 | Chrd           | -2.68 | 8   | 0.89  | 4   | 0.33 |   |
| 12980 | Chrna5         | -2.68 | 5   | 0.24  | 1   | 0.09 |   |
| 12981 | Chst7          | -2.68 | 9   | 1.26  | 5   | 0.47 |   |
| 12982 | Clic3          | -2.68 | 2   | 0.23  | 1   | 0.09 |   |
| 12983 | Clmp           | -2.68 | 8   | 0.19  | 6   | 0.07 |   |
| 12984 | Cml5           | -2.68 | 43  | 1.22  | 37  | 0.45 |   |
| 12985 | Cntn1          | -2.68 | 7   | 0.18  | 3   | 0.07 |   |
| 12986 | Cntnap5b       | -2.68 | 349 | 0.18  | 424 | 0.07 |   |
| 12987 | Cntnap5c       | -2.68 | 29  | 0.19  | 40  | 0.07 |   |
| 12988 | Commd5         | -2.68 | 0   | 2.15  | 0   | 0.8  |   |
| 12989 | Cox6b2         | -2.68 | 2   | 1.54  | 1   | 0.58 |   |
| 12990 | Cracr2a        | -2.68 | 2   | 0.78  | 3   | 0.29 |   |
| 12991 | Crct1          | -2.68 | 2   | 2.39  | 1   | 0.89 |   |
| 12992 | Crisp3         | -2.68 | 4   | 0.51  | 1   | 0.19 |   |
| 12993 | Ctrl           | -2.68 | 2   | 0.91  | 2   | 0.34 |   |
| 12994 | Cxxc5_2        | -2.68 | 2   | 0.8   | 0   | 0.3  |   |
| 12995 | Cyp4f6         | -2.68 | 0   | 0.31  | 1   | 0.12 |   |
| 12996 | Dcst1          | -2.68 | 8   | 0.25  | 2   | 0.09 |   |
| 12997 | Dennd2d        | -2.68 | 2   | 0.38  | 1   | 0.14 |   |

Supplemental Table 3  
 FSH + Ad-E versus FSH + Ad-FOXO1(A3), 24 hours

|       | A            | B     | C  | D     | E  | F    | G |
|-------|--------------|-------|----|-------|----|------|---|
| 12998 | Depdc1b      | -2.68 | 15 | 1.45  | 14 | 0.54 |   |
| 12999 | Dnah2        | -2.68 | 5  | 0.05  | 4  | 0.02 |   |
| 13000 | Drgx         | -2.68 | 5  | 0.6   | 7  | 0.23 |   |
| 13001 | Duox2        | -2.68 | 5  | 0.26  | 2  | 0.1  |   |
| 13002 | Dusp15       | -2.68 | 10 | 1.16  | 6  | 0.43 |   |
| 13003 | Egfl8        | -2.68 | 1  | 0.53  | 0  | 0.2  |   |
| 13004 | Epn3         | -2.68 | 2  | 0.21  | 2  | 0.08 |   |
| 13005 | Eva1a        | -2.68 | 4  | 0.42  | 6  | 0.16 |   |
| 13006 | Faah_1       | -2.68 | 0  | 1.66  | 0  | 0.62 |   |
| 13007 | Fam195a      | -2.68 | 14 | 2.65  | 10 | 0.99 |   |
| 13008 | Fam72a       | -2.68 | 5  | 2.05  | 5  | 0.76 |   |
| 13009 | Flt4         | -2.68 | 8  | 0.51  | 6  | 0.19 |   |
| 13010 | Gabrp        | -2.68 | 7  | 0.52  | 14 | 0.2  |   |
| 13011 | Gramd1c_2    | -2.68 | 3  | 1.53  | 2  | 0.57 |   |
| 13012 | Grhl3        | -2.68 | 5  | 0.29  | 1  | 0.11 |   |
| 13013 | Gtf2a1l      | -2.68 | 7  | 0.43  | 8  | 0.16 |   |
| 13014 | H1foo        | -2.68 | 2  | 0.63  | 1  | 0.24 |   |
| 13015 | Hist1h1d     | -2.68 | 4  | 2.19  | 2  | 0.82 |   |
| 13016 | Hist1h3f     | -2.68 | 0  | 1.76  | 0  | 0.66 |   |
| 13017 | Hist1h4b_4   | -2.68 | 2  | 2.32  | 1  | 0.87 |   |
| 13018 | Hoxd3        | -2.68 | 2  | 0.29  | 2  | 0.11 |   |
| 13019 | Hs6st2       | -2.68 | 20 | 0.37  | 19 | 0.14 |   |
| 13020 | Ifit2        | -2.68 | 2  | 0.21  | 2  | 0.08 |   |
| 13021 | Igfbp3       | -2.68 | 3  | 0.3   | 1  | 0.11 |   |
| 13022 | Il15         | -2.68 | 12 | 2.96  | 24 | 1.11 |   |
| 13023 | Kcnj9        | -2.68 | 3  | 0.29  | 6  | 0.11 |   |
| 13024 | L1td1        | -2.68 | 4  | 0.6   | 2  | 0.23 |   |
| 13025 | Lamc3        | -2.68 | 5  | 0.15  | 6  | 0.06 |   |
| 13026 | Lancl3       | -2.68 | 12 | 1.15  | 12 | 0.43 |   |
| 13027 | Lhx8         | -2.68 | 2  | 0.41  | 3  | 0.15 |   |
| 13028 | Lmo2         | -2.68 | 31 | 4.35  | 16 | 1.62 |   |
| 13029 | LOC100359574 | -2.68 | 0  | 1.87  | 0  | 0.7  |   |
| 13030 | LOC100360411 | -2.68 | 3  | 0.45  | 1  | 0.17 |   |
| 13031 | LOC100361811 | -2.68 | 4  | 5.23  | 1  | 1.95 |   |
| 13032 | LOC100362344 | -2.68 | 0  | 0.62  | 0  | 0.23 |   |
| 13033 | LOC100362965 | -2.68 | 0  | 3.35  | 0  | 1.25 |   |
| 13034 | LOC100910646 | -2.68 | 0  | 0.98  | 0  | 0.37 |   |
| 13035 | LOC100910934 | -2.68 | 0  | 0.58  | 0  | 0.22 |   |
| 13036 | LOC100911109 | -2.68 | 0  | 0.5   | 0  | 0.19 |   |
| 13037 | LOC100911374 | -2.68 | 1  | 1.26  | 1  | 0.47 |   |
| 13038 | LOC100912008 | -2.68 | 2  | 0.74  | 1  | 0.28 |   |
| 13039 | LOC100912262 | -2.68 | 0  | 0.38  | 0  | 0.14 |   |
| 13040 | LOC102550734 | -2.68 | 0  | 3.86  | 0  | 1.44 |   |
| 13041 | LOC681195    | -2.68 | 0  | 1.5   | 0  | 0.56 |   |
| 13042 | LOC683844    | -2.68 | 0  | 3.11  | 0  | 1.16 |   |
| 13043 | LOC691909    | -2.68 | 1  | 0.49  | 1  | 0.18 |   |
| 13044 | Lonrf3       | -2.68 | 7  | 0.47  | 6  | 0.18 |   |
| 13045 | Lppr3        | -2.68 | 4  | 1.14  | 2  | 0.42 |   |
| 13046 | Mdfi         | -2.68 | 4  | 0.9   | 10 | 0.34 |   |
| 13047 | Mfn2         | -2.68 | 0  | 0.32  | 0  | 0.12 |   |
| 13048 | Mgam         | -2.68 | 4  | 0.11  | 5  | 0.04 |   |
| 13049 | Miip         | -2.68 | 21 | 12.07 | 9  | 4.51 |   |
| 13050 | Mir671       | -2.68 | 0  | 7.39  | 0  | 2.76 |   |
| 13051 | Msln1        | -2.68 | 1  | 0.35  | 4  | 0.13 |   |

Supplemental Table 3  
 FSH + Ad-E versus FSH + Ad-FOXO1(A3), 24 hours

|       | A              | B     | C   | D     | E   | F    | G |
|-------|----------------|-------|-----|-------|-----|------|---|
| 13052 | Msr1           | -2.68 | 173 | 0.25  | 236 | 0.09 |   |
| 13053 | Mtmr7          | -2.68 | 9   | 0.52  | 16  | 0.19 |   |
| 13054 | Nanos3         | -2.68 | 8   | 0.98  | 13  | 0.37 |   |
| 13055 | Nat1           | -2.68 | 0   | 0.36  | 1   | 0.13 |   |
| 13056 | Ndst3          | -2.68 | 5   | 0.26  | 4   | 0.1  |   |
| 13057 | Necab1         | -2.68 | 22  | 0.33  | 39  | 0.12 |   |
| 13058 | Nfkbid         | -2.68 | 8   | 1.59  | 5   | 0.6  |   |
| 13059 | Nhsl2          | -2.68 | 6   | 0.58  | 5   | 0.22 |   |
| 13060 | Nmu            | -2.68 | 3   | 1.02  | 1   | 0.38 |   |
| 13061 | Nsg1           | -2.68 | 5   | 0.9   | 5   | 0.34 |   |
| 13062 | Nsg2           | -2.68 | 4   | 0.32  | 1   | 0.12 |   |
| 13063 | Ntpcr          | -2.68 | 45  | 12.79 | 28  | 4.78 |   |
| 13064 | Nupr1l         | -2.68 | 2   | 2.32  | 1   | 0.87 |   |
| 13065 | P2ry2          | -2.68 | 2   | 0.42  | 1   | 0.16 |   |
| 13066 | P4htm          | -2.68 | 37  | 5.75  | 16  | 2.15 |   |
| 13067 | Pbx4           | -2.68 | 20  | 0.52  | 12  | 0.2  |   |
| 13068 | Perm1          | -2.68 | 2   | 0.19  | 1   | 0.07 |   |
| 13069 | Pi16           | -2.68 | 12  | 1.54  | 11  | 0.58 |   |
| 13070 | Pkd2l2         | -2.68 | 13  | 0.59  | 9   | 0.22 |   |
| 13071 | Plac9          | -2.68 | 4   | 0.76  | 3   | 0.29 |   |
| 13072 | Pls1           | -2.68 | 2   | 0.2   | 3   | 0.08 |   |
| 13073 | Pm20d1         | -2.68 | 4   | 0.4   | 2   | 0.15 |   |
| 13074 | Pm20d2         | -2.68 | 6   | 0.56  | 2   | 0.21 |   |
| 13075 | Pnma1          | -2.68 | 2   | 0.41  | 1   | 0.15 |   |
| 13076 | Pou2f2         | -2.68 | 2   | 0.13  | 5   | 0.05 |   |
| 13077 | Ppil6          | -2.68 | 8   | 0.76  | 2   | 0.29 |   |
| 13078 | Prkcz          | -2.68 | 6   | 0.2   | 6   | 0.08 |   |
| 13079 | Psat1          | -2.68 | 14  | 1.54  | 6   | 0.57 |   |
| 13080 | Rag1           | -2.68 | 2   | 0.11  | 1   | 0.04 |   |
| 13081 | Ras12          | -2.68 | 4   | 0.3   | 3   | 0.11 |   |
| 13082 | RGD1306227     | -2.68 | 38  | 4.41  | 26  | 1.65 |   |
| 13083 | RGD1560010     | -2.68 | 14  | 2.62  | 7   | 0.98 |   |
| 13084 | RGD1560289     | -2.68 | 11  | 0.8   | 12  | 0.3  |   |
| 13085 | RGD1561157     | -2.68 | 4   | 1.73  | 2   | 0.65 |   |
| 13086 | RGD1561381     | -2.68 | 2   | 1.59  | 1   | 0.59 |   |
| 13087 | RGD1563220     | -2.68 | 0   | 0.9   | 1   | 0.34 |   |
| 13088 | RGD1563815     | -2.68 | 7   | 0.23  | 5   | 0.09 |   |
| 13089 | RGD1565415     | -2.68 | 1   | 1.62  | 1   | 0.61 |   |
| 13090 | Rhbdl1         | -2.68 | 4   | 0.96  | 2   | 0.36 |   |
| 13091 | Rn60_19_0291.1 | -2.68 | 3   | 0.89  | 2   | 0.33 |   |
| 13092 | Rn60_20_0055.3 | -2.68 | 0   | 1.34  | 1   | 0.5  |   |
| 13093 | Rpl27-1l       | -2.68 | 1   | 1.76  | 1   | 0.66 |   |
| 13094 | Rpl5l1         | -2.68 | 4   | 2.44  | 3   | 0.91 |   |
| 13095 | RT1-N2         | -2.68 | 2   | 0.36  | 1   | 0.14 |   |
| 13096 | S100b          | -2.68 | 11  | 2.44  | 6   | 0.91 |   |
| 13097 | Sap18          | -2.68 | 0   | 1.4   | 0   | 0.52 |   |
| 13098 | Scgb1c1        | -2.68 | 2   | 1.58  | 2   | 0.59 |   |
| 13099 | Scly           | -2.68 | 8   | 0.66  | 10  | 0.25 |   |
| 13100 | Sec14l2        | -2.68 | 12  | 0.84  | 9   | 0.31 |   |
| 13101 | Sept1          | -2.68 | 3   | 0.51  | 2   | 0.19 |   |
| 13102 | Sepw1          | -2.68 | 0   | 5.42  | 0   | 2.03 |   |
| 13103 | Sh3d21         | -2.68 | 7   | 0.38  | 6   | 0.14 |   |
| 13104 | Slc22a3        | -2.68 | 2   | 0.21  | 3   | 0.08 |   |
| 13105 | Slc6a1         | -2.68 | 2   | 0.18  | 1   | 0.07 |   |

Supplemental Table 3  
 FSH + Ad-E versus FSH + Ad-FOXO1(A3), 24 hours

|       | A              | B     | C  | D     | E   | F    | G |
|-------|----------------|-------|----|-------|-----|------|---|
| 13106 | SNORD105       | -2.68 | 0  | 17.24 | 0   | 6.45 |   |
| 13107 | SNORD53_SNORD5 | -2.68 | 0  | 8.14  | 0   | 3.04 |   |
| 13108 | Snrpd2l        | -2.68 | 0  | 2.03  | 0   | 0.76 |   |
| 13109 | Sox8           | -2.68 | 2  | 0.22  | 1   | 0.08 |   |
| 13110 | Spry3          | -2.68 | 3  | 0.22  | 1   | 0.08 |   |
| 13111 | Ssc4d          | -2.68 | 29 | 4.11  | 19  | 1.54 |   |
| 13112 | Tekt1          | -2.68 | 20 | 2.53  | 16  | 0.95 |   |
| 13113 | Tsga10ip       | -2.68 | 23 | 0.29  | 39  | 0.11 |   |
| 13114 | Ttc9           | -2.68 | 4  | 0.63  | 3   | 0.23 |   |
| 13115 | U3_6           | -2.68 | 0  | 3.37  | 0   | 1.26 |   |
| 13116 | Unc13d         | -2.68 | 3  | 0.18  | 1   | 0.07 |   |
| 13117 | Vwa3a          | -2.68 | 13 | 0.35  | 8   | 0.13 |   |
| 13118 | Wdr27          | -2.68 | 15 | 0.51  | 19  | 0.19 |   |
| 13119 | Wfdc10         | -2.68 | 20 | 14.87 | 10  | 5.56 |   |
| 13120 | Xirp1          | -2.68 | 3  | 0.12  | 1   | 0.04 |   |
| 13121 | Xirp2          | -2.68 | 3  | 0.06  | 1   | 0.02 |   |
| 13122 | Zbtb33         | -2.68 | 0  | 0.3   | 0   | 0.11 |   |
| 13123 | Zfp428         | -2.68 | 8  | 1.53  | 11  | 0.57 |   |
| 13124 | AABR07005533.1 | -2.68 | 1  | 0.55  | 0   | 0.21 |   |
| 13125 | AABR07028027.1 | -2.68 | 0  | 0.57  | 0   | 0.21 |   |
| 13126 | AABR07042904.1 | -2.68 | 0  | 0.41  | 1   | 0.15 |   |
| 13127 | AABR07051592.1 | -2.68 | 2  | 0.69  | 1   | 0.26 |   |
| 13128 | AABR07061328.1 | -2.68 | 3  | 0.14  | 3   | 0.05 |   |
| 13129 | AABR07061336.3 | -2.68 | 0  | 5.14  | 0   | 1.92 |   |
| 13130 | AABR07062129.1 | -2.68 | 3  | 2.04  | 2   | 0.76 |   |
| 13131 | AABR07068285.2 | -2.68 | 3  | 1.28  | 1   | 0.48 |   |
| 13132 | AC113925.2     | -2.68 | 1  | 2.32  | 1   | 0.87 |   |
| 13133 | AC130741.1     | -2.68 | 2  | 1.2   | 1   | 0.45 |   |
| 13134 | Akr1c12l1      | -2.68 | 1  | 0.59  | 1   | 0.22 |   |
| 13135 | Ankrd29_2      | -2.68 | 4  | 0.64  | 2   | 0.24 |   |
| 13136 | Arrb1          | -2.68 | 68 | 2.13  | 101 | 0.79 |   |
| 13137 | Camkv          | -2.68 | 3  | 0.2   | 2   | 0.07 |   |
| 13138 | Cfap53         | -2.68 | 22 | 1.06  | 25  | 0.39 |   |
| 13139 | Clec2dl1       | -2.68 | 37 | 0.67  | 28  | 0.25 |   |
| 13140 | Clgn           | -2.68 | 2  | 0.32  | 3   | 0.12 |   |
| 13141 | Dock2          | -2.68 | 12 | 0.86  | 11  | 0.32 |   |
| 13142 | Egfl7          | -2.68 | 7  | 0.99  | 3   | 0.37 |   |
| 13143 | Extl1          | -2.68 | 2  | 0.18  | 2   | 0.07 |   |
| 13144 | Faim_1         | -2.68 | 0  | 0.63  | 0   | 0.23 |   |
| 13145 | Fam131c        | -2.68 | 2  | 0.53  | 1   | 0.2  |   |
| 13146 | Fam46b         | -2.68 | 4  | 0.57  | 2   | 0.21 |   |
| 13147 | Fgf18          | -2.68 | 11 | 1.3   | 7   | 0.49 |   |
| 13148 | Gkn2           | -2.68 | 2  | 1.01  | 1   | 0.38 |   |
| 13149 | Igln5          | -2.68 | 12 | 4.3   | 8   | 1.61 |   |
| 13150 | Igsf9b         | -2.68 | 14 | 1.09  | 9   | 0.41 |   |
| 13151 | Kcnn1          | -2.68 | 8  | 0.82  | 9   | 0.31 |   |
| 13152 | Klrb1b         | -2.68 | 11 | 0.26  | 64  | 0.1  |   |
| 13153 | Kndc1          | -2.68 | 4  | 0.14  | 2   | 0.05 |   |
| 13154 | Lce1m          | -2.68 | 11 | 4.37  | 7   | 1.63 |   |
| 13155 | LOC100362684   | -2.68 | 0  | 2.01  | 0   | 0.75 |   |
| 13156 | LOC100910336   | -2.68 | 0  | 9.17  | 0   | 3.43 |   |
| 13157 | LOC100911034   | -2.68 | 1  | 0.52  | 0   | 0.2  |   |
| 13158 | Nfam1          | -2.68 | 2  | 0.21  | 1   | 0.08 |   |
| 13159 | Notum          | -2.68 | 4  | 0.71  | 5   | 0.27 |   |

Supplemental Table 3  
 FSH + Ad-E versus FSH + Ad-FOXO1(A3), 24 hours

|       | A              | B     | C    | D      | E    | F      | G |
|-------|----------------|-------|------|--------|------|--------|---|
| 13160 | P2rx5          | -2.68 | 2    | 0.12   | 2    | 0.04   |   |
| 13161 | Pelo           | -2.68 | 6    | 2.27   | 2    | 0.85   |   |
| 13162 | Pif1           | -2.68 | 4    | 0.38   | 6    | 0.14   |   |
| 13163 | Rdh5           | -2.68 | 3    | 0.31   | 7    | 0.12   |   |
| 13164 | RGD1304870     | -2.68 | 6    | 6.19   | 3    | 2.31   |   |
| 13165 | Rn60_12_0174.1 | -2.68 | 1    | 0.72   | 0    | 0.27   |   |
| 13166 | Slc25a21       | -2.68 | 20   | 1.03   | 18   | 0.38   |   |
| 13167 | Spdya          | -2.68 | 8    | 0.32   | 8    | 0.12   |   |
| 13168 | Spire2         | -2.68 | 3    | 0.32   | 1    | 0.12   |   |
| 13169 | Tlr8           | -2.68 | 2    | 0.21   | 2    | 0.08   |   |
| 13170 | Kit            | -2.7  | 106  | 6.81   | 57   | 2.52   |   |
| 13171 | Arf6           | -2.71 | 234  | 74.18  | 115  | 27.38  |   |
| 13172 | Fbxo31         | -2.71 | 88   | 11.43  | 58   | 4.22   |   |
| 13173 | Hmox1          | -2.72 | 66   | 13.64  | 32   | 5.01   |   |
| 13174 | Mpst           | -2.72 | 120  | 33.92  | 60   | 12.46  |   |
| 13175 | Sema7a         | -2.74 | 395  | 50.95  | 195  | 18.58  |   |
| 13176 | Fam198a        | -2.75 | 61   | 5.86   | 40   | 2.13   |   |
| 13177 | Troap          | -2.75 | 45   | 5.62   | 23   | 2.04   |   |
| 13178 | Pidd1          | -2.76 | 8    | 3.6    | 2    | 1.3    |   |
| 13179 | Fam43a         | -2.76 | 97   | 14.73  | 47   | 5.34   |   |
| 13180 | AY172581.21    | -2.77 | 145  | 749.64 | 71   | 270.69 |   |
| 13181 | Mov10          | -2.78 | 359  | 29.27  | 189  | 10.54  |   |
| 13182 | Apc2           | -2.78 | 28   | 0.99   | 13   | 0.36   |   |
| 13183 | Spock2         | -2.79 | 83   | 13.6   | 42   | 4.87   |   |
| 13184 | SNORD44_1      | -2.81 | 21   | 124.65 | 10   | 44.38  |   |
| 13185 | LOC100360117   | -2.82 | 0    | 17.41  | 0    | 6.18   |   |
| 13186 | Abo            | -2.82 | 19   | 4.13   | 11   | 1.46   |   |
| 13187 | Cntnap1        | -2.82 | 23   | 1.28   | 9    | 0.45   |   |
| 13188 | Hcn2           | -2.84 | 60   | 7.27   | 29   | 2.56   |   |
| 13189 | Slc50a1        | -2.84 | 59   | 18.37  | 31   | 6.46   |   |
| 13190 | Id4            | -2.84 | 17   | 3.79   | 9    | 1.33   |   |
| 13191 | N6amt1         | -2.84 | 24   | 5.19   | 19   | 1.83   |   |
| 13192 | Sema4a         | -2.84 | 22   | 1.82   | 14   | 0.64   |   |
| 13193 | Pdpx           | -2.85 | 34   | 5.83   | 16   | 2.04   |   |
| 13194 | Kif18b         | -2.86 | 55   | 4.94   | 28   | 1.73   |   |
| 13195 | Kcnt1          | -2.86 | 163  | 6.74   | 78   | 2.36   |   |
| 13196 | Angptl1        | -2.87 | 122  | 2.14   | 132  | 0.75   |   |
| 13197 | Asb15          | -2.87 | 16   | 1.28   | 14   | 0.45   |   |
| 13198 | Unc5d          | -2.87 | 58   | 3.6    | 27   | 1.26   |   |
| 13199 | Gemin7         | -2.87 | 19   | 5.27   | 14   | 1.84   |   |
| 13200 | Tubg2          | -2.87 | 10   | 3.36   | 5    | 1.17   |   |
| 13201 | Tmem206        | -2.88 | 400  | 88.31  | 188  | 30.68  |   |
| 13202 | Ppt2           | -2.88 | 99   | 24.34  | 31   | 8.45   |   |
| 13203 | Car14          | -2.88 | 40   | 8.11   | 26   | 2.82   |   |
| 13204 | Pop1           | -2.88 | 35   | 2.89   | 20   | 1      |   |
| 13205 | AABR07028245.1 | -2.89 | 0    | 4.97   | 0    | 1.72   |   |
| 13206 | Tgfb1          | -2.89 | 59   | 7.32   | 28   | 2.53   |   |
| 13207 | Rassf2         | -2.89 | 58   | 5.74   | 27   | 1.99   |   |
| 13208 | Chrna7         | -2.9  | 16   | 1.56   | 9    | 0.54   |   |
| 13209 | LOC689757      | -2.9  | 64   | 4.68   | 62   | 1.61   |   |
| 13210 | Adgrb1         | -2.9  | 102  | 4.86   | 46   | 1.67   |   |
| 13211 | Dhrs1          | -2.92 | 126  | 19.26  | 87   | 6.61   |   |
| 13212 | Inhba          | -2.92 | 2225 | 299.69 | 1034 | 102.6  |   |
| 13213 | Hist1h2bg      | -2.93 | 16   | 13.35  | 5    | 4.56   |   |

Supplemental Table 3  
 FSH + Ad-E versus FSH + Ad-FOXO1(A3), 24 hours

|       | A              | B     | C     | D       | E     | F      | G |
|-------|----------------|-------|-------|---------|-------|--------|---|
| 13214 | Hacd2          | -2.93 | 307   | 54.9    | 197   | 18.75  |   |
| 13215 | Chst8          | -2.94 | 352   | 42.95   | 220   | 14.61  |   |
| 13216 | LOC100910109   | -2.94 | 0     | 4.69    | 0     | 1.59   |   |
| 13217 | Bola3          | -2.94 | 21    | 3.64    | 15    | 1.24   |   |
| 13218 | Cldn11         | -2.94 | 22    | 4.3     | 12    | 1.46   |   |
| 13219 | LOC100910017   | -2.94 | 0     | 9.28    | 0     | 3.15   |   |
| 13220 | Ns5atp9        | -2.94 | 9     | 11.96   | 4     | 4.06   |   |
| 13221 | Them5          | -2.94 | 22    | 3.31    | 14    | 1.13   |   |
| 13222 | Galnt6         | -2.94 | 43    | 3.15    | 15    | 1.07   |   |
| 13223 | SNORD82        | -2.94 | 0     | 55.32   | 0     | 18.8   |   |
| 13224 | LOC100909555   | -2.97 | 36245 | 2723.77 | 25228 | 916.79 |   |
| 13225 | Asphd2         | -2.97 | 128   | 12.5    | 61    | 4.2    |   |
| 13226 | Kcnk5          | -2.97 | 22    | 2.09    | 16    | 0.7    |   |
| 13227 | Tsen34_1       | -2.98 | 0     | 18.89   | 0     | 6.34   |   |
| 13228 | AABR07032261.1 | -3.01 | 9     | 6.35    | 4     | 2.11   |   |
| 13229 | Aldh1l1        | -3.01 | 14    | 1.08    | 7     | 0.36   |   |
| 13230 | Hspa2          | -3.01 | 30    | 3.91    | 12    | 1.3    |   |
| 13231 | LOC100363943   | -3.01 | 14    | 4.54    | 9     | 1.51   |   |
| 13232 | Notch1         | -3.01 | 30    | 1.03    | 12    | 0.34   |   |
| 13233 | RGD1565367     | -3.01 | 21    | 1.64    | 16    | 0.54   |   |
| 13234 | Emilin1        | -3.01 | 10    | 0.85    | 5     | 0.28   |   |
| 13235 | Fkbpl          | -3.01 | 3     | 2.52    | 1     | 0.84   |   |
| 13236 | Ggact          | -3.01 | 30    | 6.45    | 16    | 2.14   |   |
| 13237 | Gpt            | -3.01 | 21    | 3.75    | 11    | 1.24   |   |
| 13238 | LOC100911727   | -3.01 | 0     | 1.3     | 0     | 0.43   |   |
| 13239 | LOC102553099   | -3.01 | 0     | 6.33    | 0     | 2.1    |   |
| 13240 | Nav1           | -3.01 | 15    | 0.47    | 13    | 0.16   |   |
| 13241 | Rn60_1_0959.1  | -3.01 | 8     | 1.87    | 2     | 0.62   |   |
| 13242 | Saysd1         | -3.01 | 15    | 5.78    | 14    | 1.92   |   |
| 13243 | Kirrel3        | -3.01 | 40    | 0.94    | 33    | 0.31   |   |
| 13244 | Exoc3l2        | -3.02 | 64    | 7.66    | 30    | 2.54   |   |
| 13245 | Kcng2          | -3.03 | 63    | 6.7     | 23    | 2.21   |   |
| 13246 | Tmem161a       | -3.04 | 81    | 12.85   | 39    | 4.23   |   |
| 13247 | Anapc13        | -3.04 | 10    | 14.69   | 8     | 4.83   |   |
| 13248 | LOC100911154   | -3.06 | 4860  | 697     | 2089  | 228.04 |   |
| 13249 | Adcyap1r1      | -3.06 | 37    | 1.8     | 16    | 0.59   |   |
| 13250 | Ephb3          | -3.06 | 23    | 1.45    | 11    | 0.47   |   |
| 13251 | LOC100912538   | -3.06 | 0     | 5.76    | 0     | 1.89   |   |
| 13252 | Rbpj_1         | -3.06 | 8     | 3.94    | 6     | 1.29   |   |
| 13253 | Tle2           | -3.06 | 17    | 2.04    | 8     | 0.67   |   |
| 13254 | Rasd1          | -3.07 | 244   | 52.75   | 106   | 17.2   |   |
| 13255 | Mis18a         | -3.08 | 58    | 11.17   | 37    | 3.63   |   |
| 13256 | Pdf            | -3.08 | 28    | 11.96   | 14    | 3.89   |   |
| 13257 | Rasal1         | -3.09 | 33    | 3.35    | 17    | 1.09   |   |
| 13258 | Celsr2         | -3.1  | 312   | 10.65   | 136   | 3.43   |   |
| 13259 | Pitpnm3        | -3.11 | 101   | 3.9     | 58    | 1.25   |   |
| 13260 | Calml3         | -3.11 | 86    | 22.65   | 36    | 7.28   |   |
| 13261 | AABR07040624.1 | -3.12 | 13    | 16.57   | 5     | 5.31   |   |
| 13262 | AC103129.2     | -3.12 | 0     | 1.73    | 0     | 0.55   |   |
| 13263 | Ccl5           | -3.12 | 7     | 4.65    | 3     | 1.49   |   |
| 13264 | Mapt           | -3.12 | 12    | 0.4     | 15    | 0.13   |   |
| 13265 | Rn60_X_0224.3  | -3.12 | 38    | 3.88    | 38    | 1.24   |   |
| 13266 | RT1-CE7        | -3.12 | 9     | 2.07    | 5     | 0.66   |   |
| 13267 | Vwa5b2         | -3.12 | 12    | 0.56    | 8     | 0.18   |   |

Supplemental Table 3  
 FSH + Ad-E versus FSH + Ad-FOXO1(A3), 24 hours

|       | A              | B     | C     | D       | E    | F      | G |
|-------|----------------|-------|-------|---------|------|--------|---|
| 13268 | AABR07040622.1 | -3.12 | 5     | 2.87    | 3    | 0.92   |   |
| 13269 | B3gnt1         | -3.12 | 0     | 2.03    | 0    | 0.65   |   |
| 13270 | Ceacam18       | -3.12 | 9     | 2.23    | 6    | 0.71   |   |
| 13271 | LOC100361636   | -3.12 | 1     | 1.02    | 1    | 0.33   |   |
| 13272 | Nxpe2          | -3.16 | 17    | 5.65    | 6    | 1.79   |   |
| 13273 | Plekhd1        | -3.16 | 28    | 2.8     | 18   | 0.89   |   |
| 13274 | Hmgb2          | -3.18 | 18    | 11.94   | 7    | 3.76   |   |
| 13275 | Casc5          | -3.21 | 25    | 1.07    | 13   | 0.33   |   |
| 13276 | Igf2           | -3.21 | 13    | 0.77    | 4    | 0.24   |   |
| 13277 | LOC100911840   | -3.21 | 2     | 4.28    | 2    | 1.33   |   |
| 13278 | RGD1310335     | -3.21 | 13    | 1.59    | 7    | 0.5    |   |
| 13279 | Slc7a7         | -3.21 | 42    | 4.88    | 30   | 1.52   |   |
| 13280 | Cyp2t1         | -3.21 | 20    | 2.3     | 9    | 0.72   |   |
| 13281 | Wdr78          | -3.21 | 31    | 1.17    | 36   | 0.36   |   |
| 13282 | Prkce          | -3.23 | 89    | 10.85   | 55   | 3.36   |   |
| 13283 | Dpf1           | -3.24 | 47    | 7.09    | 25   | 2.19   |   |
| 13284 | Prlr           | -3.24 | 265   | 5.6     | 160  | 1.73   |   |
| 13285 | Inha           | -3.25 | 14653 | 3720.95 | 6064 | 1146.2 |   |
| 13286 | AABR07052523.1 | -3.25 | 2     | 3.69    | 2    | 1.14   |   |
| 13287 | LOC688932      | -3.28 | 1     | 5.04    | 1    | 1.54   |   |
| 13288 | Slc7a4         | -3.28 | 27    | 4.15    | 11   | 1.27   |   |
| 13289 | Mmd2           | -3.28 | 37    | 4.56    | 16   | 1.39   |   |
| 13290 | Tmco3          | -3.3  | 10    | 4.63    | 4    | 1.4    |   |
| 13291 | Folr1          | -3.32 | 80    | 26.81   | 32   | 8.07   |   |
| 13292 | Sox18          | -3.34 | 40    | 8.86    | 17   | 2.65   |   |
| 13293 | 1700109H08Rik  | -3.34 | 6     | 1.28    | 12   | 0.38   |   |
| 13294 | AABR07018857.1 | -3.34 | 5     | 4.71    | 2    | 1.41   |   |
| 13295 | AC117869.1     | -3.34 | 3     | 4.22    | 1    | 1.26   |   |
| 13296 | AC133403.1     | -3.34 | 2     | 1.03    | 0    | 0.31   |   |
| 13297 | Ankrd55        | -3.34 | 20    | 0.63    | 13   | 0.19   |   |
| 13298 | Ccdc71l        | -3.34 | 5     | 2.78    | 2    | 0.83   |   |
| 13299 | Cd80           | -3.34 | 5     | 0.41    | 3    | 0.12   |   |
| 13300 | Cdkl4          | -3.34 | 6     | 2.08    | 6    | 0.62   |   |
| 13301 | Fbxl16         | -3.34 | 4     | 1.26    | 2    | 0.38   |   |
| 13302 | Hapln1         | -3.34 | 6     | 0.36    | 4    | 0.11   |   |
| 13303 | LOC100362176   | -3.34 | 5     | 2.43    | 2    | 0.73   |   |
| 13304 | LOC257642      | -3.34 | 12    | 23.82   | 5    | 7.12   |   |
| 13305 | Mmp15          | -3.34 | 6     | 0.45    | 4    | 0.14   |   |
| 13306 | Pllp           | -3.34 | 12    | 1.23    | 10   | 0.37   |   |
| 13307 | RGD1565904     | -3.34 | 0     | 4       | 0    | 1.2    |   |
| 13308 | RGD1566099     | -3.34 | 7     | 2.15    | 3    | 0.64   |   |
| 13309 | Tnfaip8l2      | -3.34 | 9     | 1.31    | 11   | 0.39   |   |
| 13310 | Wdr89          | -3.34 | 16    | 2.59    | 6    | 0.77   |   |
| 13311 | Zfp146         | -3.34 | 0     | 2.06    | 0    | 0.62   |   |
| 13312 | Zfp74_2        | -3.34 | 0     | 0.88    | 0    | 0.26   |   |
| 13313 | Dpm3           | -3.34 | 10    | 9.19    | 4    | 2.75   |   |
| 13314 | Eva1b          | -3.34 | 5     | 1.68    | 2    | 0.5    |   |
| 13315 | Fads6          | -3.34 | 58    | 10.08   | 25   | 3.01   |   |
| 13316 | Hexim2         | -3.34 | 8     | 1.25    | 5    | 0.37   |   |
| 13317 | LOC100361854   | -3.34 | 0     | 5.2     | 0    | 1.56   |   |
| 13318 | Mapk4          | -3.34 | 6     | 0.39    | 5    | 0.12   |   |
| 13319 | Oasl2          | -3.34 | 5     | 0.65    | 5    | 0.19   |   |
| 13320 | Pla2g1b        | -3.34 | 5     | 3.19    | 3    | 0.95   |   |
| 13321 | Shc2           | -3.34 | 7     | 0.46    | 4    | 0.14   |   |

Supplemental Table 3  
 FSH + Ad-E versus FSH + Ad-FOXO1(A3), 24 hours

|       | A              | B     | C    | D      | E    | F      | G |
|-------|----------------|-------|------|--------|------|--------|---|
| 13322 | Zc3h12b        | -3.34 | 12   | 1.14   | 10   | 0.34   |   |
| 13323 | Crabp2_2       | -3.42 | 202  | 108.76 | 65   | 31.85  |   |
| 13324 | LOC100360491   | -3.42 | 77   | 146.96 | 20   | 42.96  |   |
| 13325 | RGD1566320     | -3.44 | 19   | 10.09  | 10   | 2.93   |   |
| 13326 | Gcat           | -3.44 | 18   | 4.15   | 7    | 1.21   |   |
| 13327 | Arrdc2         | -3.48 | 16   | 2.03   | 6    | 0.58   |   |
| 13328 | LOC100912534   | -3.48 | 2    | 5.96   | 1    | 1.71   |   |
| 13329 | RGD1359290     | -3.48 | 20   | 7.1    | 18   | 2.04   |   |
| 13330 | AABR07053879.1 | -3.48 | 2    | 4.81   | 1    | 1.38   |   |
| 13331 | AC117925.2     | -3.48 | 0    | 5.23   | 0    | 1.5    |   |
| 13332 | Dnm1           | -3.48 | 23   | 1.47   | 9    | 0.42   |   |
| 13333 | Hist3h2ba      | -3.48 | 5    | 7.47   | 3    | 2.15   |   |
| 13334 | Cyp11a1        | -3.52 | 686  | 102.64 | 269  | 29.17  |   |
| 13335 | Sgk1           | -3.53 | 749  | 73.46  | 291  | 20.8   |   |
| 13336 | Fam110c        | -3.54 | 46   | 5.24   | 17   | 1.48   |   |
| 13337 | Fbxo44         | -3.54 | 175  | 39.31  | 72   | 11.1   |   |
| 13338 | Pycr1          | -3.57 | 8    | 2.31   | 3    | 0.65   |   |
| 13339 | Angptl2        | -3.57 | 6    | 1.36   | 2    | 0.38   |   |
| 13340 | Cntfr          | -3.57 | 10   | 1.56   | 5    | 0.44   |   |
| 13341 | Hsf2bp         | -3.57 | 21   | 1.08   | 17   | 0.3    |   |
| 13342 | Mt1m           | -3.57 | 1    | 7.74   | 0    | 2.17   |   |
| 13343 | Cabp4          | -3.57 | 20   | 2.01   | 13   | 0.56   |   |
| 13344 | Dnah9          | -3.57 | 36   | 0.22   | 22   | 0.06   |   |
| 13345 | Fdxr           | -3.57 | 217  | 36.78  | 77   | 10.29  |   |
| 13346 | Dysf           | -3.68 | 19   | 0.59   | 7    | 0.16   |   |
| 13347 | E2f7           | -3.68 | 33   | 2.36   | 24   | 0.64   |   |
| 13348 | Mepce          | -3.68 | 0    | 2.01   | 0    | 0.55   |   |
| 13349 | Dner           | -3.68 | 13   | 2.6    | 5    | 0.71   |   |
| 13350 | Osgin1         | -3.68 | 12   | 1.81   | 4    | 0.49   |   |
| 13351 | Tenm2          | -3.68 | 36   | 0.43   | 16   | 0.12   |   |
| 13352 | Calr3          | -3.68 | 12   | 2.85   | 5    | 0.78   |   |
| 13353 | LOC100910252   | -3.68 | 17   | 2.69   | 11   | 0.73   |   |
| 13354 | Exoc3l1        | -3.7  | 46   | 5.19   | 17   | 1.4    |   |
| 13355 | Tst            | -3.71 | 140  | 48.7   | 55   | 13.13  |   |
| 13356 | Acpp           | -3.72 | 25   | 1.6    | 12   | 0.43   |   |
| 13357 | Efna1          | -3.75 | 14   | 3.3    | 5    | 0.88   |   |
| 13358 | LOC100360977   | -3.75 | 3    | 13.2   | 0    | 3.52   |   |
| 13359 | Nol12          | -3.75 | 18   | 4.07   | 8    | 1.09   |   |
| 13360 | Lilrb3l        | -3.76 | 212  | 4.19   | 272  | 1.12   |   |
| 13361 | Rxrg           | -3.77 | 33   | 5.29   | 11   | 1.4    |   |
| 13362 | Psmb8          | -3.79 | 9    | 2.98   | 3    | 0.79   |   |
| 13363 | Olfm2          | -3.79 | 24   | 1.22   | 12   | 0.32   |   |
| 13364 | Tmem167a       | -3.79 | 29   | 28.5   | 22   | 7.52   |   |
| 13365 | Tmem203        | -3.79 | 17   | 7.42   | 6    | 1.96   |   |
| 13366 | LOC100360679   | -3.79 | 40   | 469.62 | 19   | 123.86 |   |
| 13367 | Rcn3           | -3.81 | 43   | 7.84   | 21   | 2.06   |   |
| 13368 | Rasa4          | -3.82 | 30   | 2.58   | 14   | 0.68   |   |
| 13369 | Tert           | -3.85 | 31   | 2.47   | 15   | 0.64   |   |
| 13370 | Myo7a          | -3.86 | 64   | 2.61   | 22   | 0.68   |   |
| 13371 | Slit3          | -3.86 | 32   | 1.63   | 19   | 0.42   |   |
| 13372 | LOC685186      | -3.89 | 208  | 778.1  | 51   | 200.25 |   |
| 13373 | Scarb1         | -3.89 | 4486 | 573.11 | 1637 | 147.37 |   |
| 13374 | Lhcgr          | -3.92 | 419  | 50.96  | 139  | 13     |   |
| 13375 | LOC100362830   | -3.94 | 40   | 118.27 | 12   | 30.03  |   |



Supplemental Table 3  
 FSH + Ad-E versus FSH + Ad-FOXO1(A3), 24 hours

|       | A                | B     | C  | D     | E  | F    | G |
|-------|------------------|-------|----|-------|----|------|---|
| 13376 | Timm17b          | -3.94 | 0  | 36.97 | 0  | 9.39 |   |
| 13377 | Phlda3           | -3.95 | 61 | 15.01 | 22 | 3.8  |   |
| 13378 | 5_8S_rRNA_20     | -4.01 | 0  | 7.1   | 0  | 1.77 |   |
| 13379 | A3galt2          | -4.01 | 4  | 0.57  | 3  | 0.14 |   |
| 13380 | AABR07072639.1   | -4.01 | 5  | 1.15  | 6  | 0.29 |   |
| 13381 | Apol9a           | -4.01 | 1  | 0.67  | 0  | 0.17 |   |
| 13382 | Cadm2            | -4.01 | 11 | 0.56  | 13 | 0.14 |   |
| 13383 | Cyb5d2           | -4.01 | 14 | 1.5   | 12 | 0.37 |   |
| 13384 | lsm2             | -4.01 | 5  | 0.74  | 1  | 0.18 |   |
| 13385 | Kcnab2           | -4.01 | 12 | 0.55  | 7  | 0.14 |   |
| 13386 | Klhl3            | -4.01 | 16 | 0.78  | 5  | 0.19 |   |
| 13387 | Lag3             | -4.01 | 4  | 0.58  | 2  | 0.15 |   |
| 13388 | LOC100909485     | -4.01 | 0  | 1.39  | 0  | 0.35 |   |
| 13389 | LOC691354        | -4.01 | 9  | 1.04  | 13 | 0.26 |   |
| 13390 | Rftn2            | -4.01 | 9  | 0.73  | 7  | 0.18 |   |
| 13391 | Rpgrip1          | -4.01 | 18 | 0.2   | 21 | 0.05 |   |
| 13392 | Scn8a            | -4.01 | 6  | 0.16  | 10 | 0.04 |   |
| 13393 | Sgsm1            | -4.01 | 1  | 0.19  | 1  | 0.05 |   |
| 13394 | AABR07002928.1   | -4.01 | 11 | 0.54  | 3  | 0.13 |   |
| 13395 | AABR07010570.1   | -4.01 | 0  | 1.67  | 0  | 0.42 |   |
| 13396 | AABR07020860.1   | -4.01 | 1  | 0.32  | 0  | 0.08 |   |
| 13397 | AABR07034833.1   | -4.01 | 3  | 3.62  | 2  | 0.9  |   |
| 13398 | AABR07037412.2   | -4.01 | 0  | 0.91  | 0  | 0.23 |   |
| 13399 | AABR07048957.1   | -4.01 | 0  | 2.6   | 0  | 0.65 |   |
| 13400 | AABR07051376.1   | -4.01 | 7  | 1.61  | 3  | 0.4  |   |
| 13401 | AABR07064099.1   | -4.01 | 0  | 0.88  | 0  | 0.22 |   |
| 13402 | AABR07064634.1   | -4.01 | 2  | 2.81  | 0  | 0.7  |   |
| 13403 | AC110981.1       | -4.01 | 1  | 1.29  | 1  | 0.32 |   |
| 13404 | AC118794.1       | -4.01 | 6  | 0.09  | 10 | 0.02 |   |
| 13405 | AC119015.2       | -4.01 | 37 | 7.47  | 28 | 1.86 |   |
| 13406 | Ager             | -4.01 | 4  | 1.19  | 1  | 0.3  |   |
| 13407 | Bola2            | -4.01 | 1  | 4.21  | 0  | 1.05 |   |
| 13408 | Calml5           | -4.01 | 10 | 1.8   | 3  | 0.45 |   |
| 13409 | Camk2n2          | -4.01 | 3  | 2.46  | 3  | 0.61 |   |
| 13410 | Cd99l2_1         | -4.01 | 10 | 1.54  | 4  | 0.38 |   |
| 13411 | Cdh18            | -4.01 | 17 | 0.47  | 14 | 0.12 |   |
| 13412 | Cenpm            | -4.01 | 15 | 1.56  | 7  | 0.39 |   |
| 13413 | Cftr             | -4.01 | 12 | 0.32  | 8  | 0.08 |   |
| 13414 | Chac1            | -4.01 | 3  | 0.69  | 1  | 0.17 |   |
| 13415 | Chit1            | -4.01 | 4  | 0.47  | 1  | 0.12 |   |
| 13416 | Chtf18           | -4.01 | 18 | 1.84  | 7  | 0.46 |   |
| 13417 | Creb3l4          | -4.01 | 1  | 0.41  | 1  | 0.1  |   |
| 13418 | Def6             | -4.01 | 18 | 1.75  | 7  | 0.44 |   |
| 13419 | Drp2             | -4.01 | 7  | 0.16  | 2  | 0.04 |   |
| 13420 | Dtx1             | -4.01 | 16 | 1.73  | 7  | 0.43 |   |
| 13421 | Ebf3             | -4.01 | 4  | 0.22  | 3  | 0.06 |   |
| 13422 | Emx2             | -4.01 | 3  | 0.37  | 2  | 0.09 |   |
| 13423 | ENSRNOG000000056 | -4.01 | 13 | 0.39  | 3  | 0.1  |   |
| 13424 | Esrrg            | -4.01 | 10 | 0.2   | 7  | 0.05 |   |
| 13425 | Fam180a          | -4.01 | 4  | 0.62  | 5  | 0.16 |   |
| 13426 | Fgf11            | -4.01 | 3  | 0.37  | 1  | 0.09 |   |
| 13427 | Gdf9             | -4.01 | 6  | 1.57  | 2  | 0.39 |   |
| 13428 | Gpd1             | -4.01 | 6  | 0.76  | 2  | 0.19 |   |
| 13429 | Gpr165           | -4.01 | 3  | 0.18  | 1  | 0.04 |   |

Supplemental Table 3  
 FSH + Ad-E versus FSH + Ad-FOXO1(A3), 24 hours

|       | A              | B     | C  | D     | E  | F    | G |
|-------|----------------|-------|----|-------|----|------|---|
| 13430 | Gpr63          | -4.01 | 7  | 0.45  | 4  | 0.11 |   |
| 13431 | Gulo           | -4.01 | 3  | 0.47  | 1  | 0.12 |   |
| 13432 | Hipk4          | -4.01 | 3  | 0.45  | 14 | 0.11 |   |
| 13433 | Hsd17b3        | -4.01 | 7  | 0.98  | 11 | 0.24 |   |
| 13434 | Inpp5d         | -4.01 | 8  | 0.44  | 5  | 0.11 |   |
| 13435 | Klhl30         | -4.01 | 3  | 0.4   | 1  | 0.1  |   |
| 13436 | Krt14          | -4.01 | 3  | 0.51  | 0  | 0.13 |   |
| 13437 | LOC100360619   | -4.01 | 1  | 3.52  | 1  | 0.88 |   |
| 13438 | LOC100910951   | -4.01 | 7  | 5.9   | 1  | 1.47 |   |
| 13439 | LOC100911851   | -4.01 | 0  | 0.27  | 0  | 0.07 |   |
| 13440 | LOC100911963   | -4.01 | 0  | 2.12  | 0  | 0.53 |   |
| 13441 | LOC102553180   | -4.01 | 6  | 0.91  | 2  | 0.23 |   |
| 13442 | LOC687679      | -4.01 | 1  | 8.53  | 0  | 2.13 |   |
| 13443 | Lrrc73         | -4.01 | 3  | 0.84  | 2  | 0.21 |   |
| 13444 | Lrtomt         | -4.01 | 3  | 1.24  | 5  | 0.31 |   |
| 13445 | Ly6d           | -4.01 | 3  | 1.55  | 1  | 0.39 |   |
| 13446 | Mapk12         | -4.01 | 4  | 0.5   | 5  | 0.12 |   |
| 13447 | Mas1           | -4.01 | 5  | 0.54  | 10 | 0.14 |   |
| 13448 | Mast4_1        | -4.01 | 0  | 0.14  | 0  | 0.04 |   |
| 13449 | Medag          | -4.01 | 7  | 0.49  | 3  | 0.12 |   |
| 13450 | Mfsd2a         | -4.01 | 15 | 1.53  | 4  | 0.38 |   |
| 13451 | Mst1r          | -4.01 | 3  | 0.26  | 1  | 0.07 |   |
| 13452 | Mtnr1a         | -4.01 | 5  | 0.61  | 2  | 0.15 |   |
| 13453 | Nos3           | -4.01 | 4  | 0.2   | 2  | 0.05 |   |
| 13454 | Ocln           | -4.01 | 5  | 0.25  | 4  | 0.06 |   |
| 13455 | Phyhip_2       | -4.01 | 0  | 4.7   | 0  | 1.17 |   |
| 13456 | Piwil2         | -4.01 | 14 | 0.21  | 11 | 0.05 |   |
| 13457 | Pramef8        | -4.01 | 3  | 0.59  | 1  | 0.15 |   |
| 13458 | Ptgds          | -4.01 | 6  | 2.76  | 2  | 0.69 |   |
| 13459 | Ptprz1         | -4.01 | 12 | 0.28  | 9  | 0.07 |   |
| 13460 | Rapsn          | -4.01 | 16 | 1.97  | 5  | 0.49 |   |
| 13461 | Rbp1           | -4.01 | 4  | 1.56  | 1  | 0.39 |   |
| 13462 | RGD1560617     | -4.01 | 0  | 0.94  | 1  | 0.23 |   |
| 13463 | RGD1562063     | -4.01 | 4  | 0.21  | 1  | 0.05 |   |
| 13464 | RGD1563905     | -4.01 | 2  | 1.86  | 1  | 0.46 |   |
| 13465 | RGD1566136     | -4.01 | 5  | 3.73  | 1  | 0.93 |   |
| 13466 | Rln1           | -4.01 | 3  | 1.37  | 1  | 0.34 |   |
| 13467 | Rn60_12_0174.2 | -4.01 | 1  | 1.04  | 0  | 0.26 |   |
| 13468 | Rn60_14_0449.2 | -4.01 | 0  | 2.41  | 0  | 0.6  |   |
| 13469 | Rn60_5_0825.2  | -4.01 | 3  | 1.65  | 1  | 0.41 |   |
| 13470 | Rn60_5_1607.1  | -4.01 | 2  | 1.72  | 1  | 0.43 |   |
| 13471 | Rnf208         | -4.01 | 7  | 1.91  | 2  | 0.48 |   |
| 13472 | Rpl26-ps1      | -4.01 | 0  | 2.48  | 0  | 0.62 |   |
| 13473 | Rpl37-ps1      | -4.01 | 0  | 3.69  | 0  | 0.92 |   |
| 13474 | Rps29_4        | -4.01 | 1  | 7.17  | 1  | 1.79 |   |
| 13475 | Samd5          | -4.01 | 13 | 0.87  | 4  | 0.22 |   |
| 13476 | Scarf1         | -4.01 | 5  | 0.8   | 2  | 0.2  |   |
| 13477 | Slc29a2        | -4.01 | 0  | 0.79  | 0  | 0.2  |   |
| 13478 | SNORA61_15     | -4.01 | 0  | 8.36  | 0  | 2.08 |   |
| 13479 | Taf9           | -4.01 | 1  | 4.25  | 0  | 1.06 |   |
| 13480 | Tbcc           | -4.01 | 0  | 0.94  | 0  | 0.23 |   |
| 13481 | Thegl          | -4.01 | 6  | 0.41  | 2  | 0.1  |   |
| 13482 | Timm13         | -4.01 | 50 | 21.59 | 16 | 5.38 |   |
| 13483 | Tlr12          | -4.01 | 3  | 0.25  | 1  | 0.06 |   |

Supplemental Table 3  
 FSH + Ad-E versus FSH + Ad-FOXO1(A3), 24 hours

|       | A              | B     | C   | D      | E   | F     | G |
|-------|----------------|-------|-----|--------|-----|-------|---|
| 13484 | Tppp           | -4.01 | 8   | 1.73   | 2   | 0.43  |   |
| 13485 | Trim45         | -4.01 | 15  | 1.88   | 5   | 0.47  |   |
| 13486 | Trim7          | -4.01 | 95  | 12.75  | 30  | 3.18  |   |
| 13487 | Tssk3          | -4.01 | 9   | 1.95   | 3   | 0.49  |   |
| 13488 | Tssk6          | -4.01 | 3   | 0.83   | 1   | 0.21  |   |
| 13489 | Unc13a         | -4.01 | 12  | 0.63   | 4   | 0.16  |   |
| 13490 | Wfdc6a         | -4.01 | 18  | 1.44   | 10  | 0.36  |   |
| 13491 | Zim1           | -4.01 | 2   | 0.35   | 2   | 0.09  |   |
| 13492 | Ptx3           | -4.08 | 14  | 11.48  | 5   | 2.81  |   |
| 13493 | Rpl31l4        | -4.12 | 2   | 30.87  | 0   | 7.48  |   |
| 13494 | Ddit4          | -4.13 | 175 | 36.42  | 57  | 8.81  |   |
| 13495 | C1qtnf6        | -4.15 | 31  | 3.78   | 11  | 0.91  |   |
| 13496 | Kcnq1          | -4.15 | 123 | 2.81   | 135 | 0.68  |   |
| 13497 | Phf7           | -4.2  | 33  | 4.81   | 43  | 1.14  |   |
| 13498 | Rps2_2         | -4.23 | 77  | 409.28 | 12  | 96.68 |   |
| 13499 | Tuba4a         | -4.28 | 11  | 4      | 6   | 0.93  |   |
| 13500 | Mfsd4          | -4.28 | 7   | 1.61   | 6   | 0.38  |   |
| 13501 | RGD1561333     | -4.28 | 1   | 14.97  | 0   | 3.5   |   |
| 13502 | Sorcs2         | -4.28 | 26  | 0.89   | 14  | 0.21  |   |
| 13503 | Enkd1          | -4.35 | 11  | 3.07   | 4   | 0.71  |   |
| 13504 | Lrrc74b        | -4.35 | 25  | 4.12   | 11  | 0.95  |   |
| 13505 | Fbxo2          | -4.39 | 24  | 6.41   | 7   | 1.46  |   |
| 13506 | Cybb           | -4.41 | 33  | 2.79   | 13  | 0.63  |   |
| 13507 | Nudt16l1       | -4.43 | 25  | 15.19  | 10  | 3.43  |   |
| 13508 | Gins1          | -4.46 | 26  | 3.36   | 33  | 0.75  |   |
| 13509 | Rac3           | -4.46 | 11  | 6.29   | 5   | 1.41  |   |
| 13510 | Zfp605         | -4.46 | 10  | 1.12   | 5   | 0.25  |   |
| 13511 | Kbtbd6_1       | -4.46 | 0   | 2.46   | 0   | 0.55  |   |
| 13512 | Slc16a12       | -4.46 | 10  | 1.08   | 4   | 0.24  |   |
| 13513 | Tmem178a       | -4.46 | 14  | 2.17   | 12  | 0.49  |   |
| 13514 | Srgap3         | -4.57 | 62  | 2.64   | 24  | 0.58  |   |
| 13515 | Gsta1          | -4.58 | 110 | 22.18  | 35  | 4.84  |   |
| 13516 | Sfrp4          | -4.65 | 89  | 6.86   | 34  | 1.47  |   |
| 13517 | AC117925.4     | -4.68 | 0   | 4.71   | 0   | 1.01  |   |
| 13518 | Dcp2_3         | -4.68 | 0   | 1.95   | 0   | 0.42  |   |
| 13519 | Tas1r1         | -4.68 | 23  | 0.89   | 13  | 0.19  |   |
| 13520 | U1_40          | -4.68 | 6   | 15.36  | 2   | 3.28  |   |
| 13521 | Grasp          | -4.68 | 6   | 1.23   | 3   | 0.26  |   |
| 13522 | Lsm2           | -4.68 | 4   | 2.68   | 2   | 0.57  |   |
| 13523 | Mrpl53_1       | -4.68 | 0   | 7.04   | 0   | 1.5   |   |
| 13524 | Plaur          | -4.68 | 7   | 2.47   | 3   | 0.53  |   |
| 13525 | Tap2_2         | -4.68 | 1   | 4.61   | 0   | 0.98  |   |
| 13526 | Tmem200c       | -4.68 | 8   | 0.83   | 6   | 0.18  |   |
| 13527 | AABR07064724.1 | -4.74 | 1   | 176.51 | 0   | 37.22 |   |
| 13528 | Zdhhc12        | -4.78 | 17  | 8.18   | 7   | 1.71  |   |
| 13529 | Gpx3           | -4.86 | 43  | 9.87   | 15  | 2.03  |   |
| 13530 | Acsm5          | -4.9  | 23  | 1.1    | 11  | 0.22  |   |
| 13531 | Ift27          | -4.9  | 27  | 7.8    | 17  | 1.59  |   |
| 13532 | Scube1         | -4.9  | 21  | 0.94   | 4   | 0.19  |   |
| 13533 | Stox1          | -4.9  | 23  | 1.2    | 13  | 0.25  |   |
| 13534 | Clstn3         | -4.9  | 23  | 2.02   | 7   | 0.41  |   |
| 13535 | Lrrc56         | -4.9  | 7   | 1.87   | 5   | 0.38  |   |
| 13536 | Pappa          | -4.95 | 174 | 7.79   | 66  | 1.57  |   |
| 13537 | Gstt3          | -4.97 | 31  | 5.27   | 10  | 1.06  |   |

Supplemental Table 3  
 FSH + Ad-E versus FSH + Ad-FOXO1(A3), 24 hours

|       | A              | B     | C  | D       | E  | F      | G |
|-------|----------------|-------|----|---------|----|--------|---|
| 13538 | RGD1306091     | -5.02 | 26 | 1.82    | 10 | 0.36   |   |
| 13539 | AABR07072440.1 | -5.08 | 1  | 23.64   | 0  | 4.65   |   |
| 13540 | Rplp1_2        | -5.13 | 9  | 24.21   | 2  | 4.72   |   |
| 13541 | Dcxr           | -5.35 | 8  | 2.54    | 4  | 0.47   |   |
| 13542 | Dlg2           | -5.35 | 22 | 0.57    | 32 | 0.11   |   |
| 13543 | Gns_1          | -5.35 | 0  | 0.76    | 0  | 0.14   |   |
| 13544 | LOC100911286   | -5.35 | 0  | 1.54    | 0  | 0.29   |   |
| 13545 | P2ry4          | -5.35 | 7  | 2.46    | 2  | 0.46   |   |
| 13546 | RT1-T24-3      | -5.35 | 10 | 0.91    | 15 | 0.17   |   |
| 13547 | Slc16a3        | -5.35 | 8  | 0.68    | 8  | 0.13   |   |
| 13548 | SNORD45_3      | -5.35 | 4  | 18.1    | 1  | 3.38   |   |
| 13549 | 5_8S_rRNA_5    | -5.35 | 1  | 9.47    | 0  | 1.77   |   |
| 13550 | AABR07021910.1 | -5.35 | 1  | 0.62    | 0  | 0.12   |   |
| 13551 | AABR07027511.1 | -5.35 | 0  | 0.95    | 0  | 0.18   |   |
| 13552 | AABR07032751.1 | -5.35 | 18 | 5.96    | 5  | 1.11   |   |
| 13553 | AABR07069599.1 | -5.35 | 23 | 13.09   | 4  | 2.45   |   |
| 13554 | Aox2           | -5.35 | 27 | 0.66    | 25 | 0.12   |   |
| 13555 | Ap5z1          | -5.35 | 13 | 5.94    | 3  | 1.11   |   |
| 13556 | Cfap46_2       | -5.35 | 4  | 0.44    | 1  | 0.08   |   |
| 13557 | Cox4i2         | -5.35 | 4  | 1.37    | 2  | 0.26   |   |
| 13558 | Cyp4f4         | -5.35 | 12 | 1.31    | 6  | 0.24   |   |
| 13559 | Dnajb13        | -5.35 | 7  | 0.64    | 9  | 0.12   |   |
| 13560 | Dyx1c1         | -5.35 | 8  | 0.73    | 6  | 0.14   |   |
| 13561 | Gfra1          | -5.35 | 9  | 0.49    | 5  | 0.09   |   |
| 13562 | Kcnc4          | -5.35 | 13 | 0.51    | 5  | 0.1    |   |
| 13563 | Kcnn2          | -5.35 | 8  | 0.82    | 4  | 0.15   |   |
| 13564 | Lilrb3         | -5.35 | 8  | 0.55    | 5  | 0.1    |   |
| 13565 | LOC100361240   | -5.35 | 3  | 5.75    | 1  | 1.07   |   |
| 13566 | LOC680161      | -5.35 | 0  | 1.81    | 0  | 0.34   |   |
| 13567 | Maf            | -5.35 | 4  | 0.74    | 1  | 0.14   |   |
| 13568 | Matk           | -5.35 | 6  | 0.89    | 2  | 0.17   |   |
| 13569 | Plac1_1        | -5.35 | 2  | 1.37    | 1  | 0.26   |   |
| 13570 | Prss53         | -5.35 | 13 | 0.73    | 4  | 0.14   |   |
| 13571 | RGD1309779     | -5.35 | 1  | 2.34    | 0  | 0.44   |   |
| 13572 | RGD1564074     | -5.35 | 22 | 2.22    | 9  | 0.41   |   |
| 13573 | RGD1566189     | -5.35 | 2  | 5.25    | 0  | 0.98   |   |
| 13574 | Rn60_X_0634.2  | -5.35 | 3  | 1.1     | 1  | 0.21   |   |
| 13575 | Rorc           | -5.35 | 3  | 0.97    | 0  | 0.18   |   |
| 13576 | Scara5         | -5.35 | 13 | 0.76    | 6  | 0.14   |   |
| 13577 | Slc12a5        | -5.35 | 12 | 0.42    | 3  | 0.08   |   |
| 13578 | Slc6a7         | -5.35 | 37 | 2.18    | 10 | 0.41   |   |
| 13579 | Spint1         | -5.35 | 3  | 0.6     | 1  | 0.11   |   |
| 13580 | Spint3         | -5.35 | 8  | 5.49    | 10 | 1.03   |   |
| 13581 | Tbata          | -5.35 | 10 | 1.26    | 3  | 0.23   |   |
| 13582 | AABR07004397.2 | -5.35 | 4  | 3.06    | 1  | 0.57   |   |
| 13583 | AABR07036452.1 | -5.35 | 6  | 1.45    | 3  | 0.27   |   |
| 13584 | Colca2         | -5.35 | 7  | 2.01    | 4  | 0.38   |   |
| 13585 | Gpm6b          | -5.35 | 6  | 0.64    | 3  | 0.12   |   |
| 13586 | SCARNA17       | -5.35 | 4  | 10.27   | 1  | 1.92   |   |
| 13587 | Tor4a          | -5.62 | 22 | 2.53    | 6  | 0.45   |   |
| 13588 | Dhh            | -5.64 | 62 | 8.62    | 18 | 1.53   |   |
| 13589 | Brms1_2        | -5.68 | 0  | 8.34    | 0  | 1.47   |   |
| 13590 | 5_8S_rRNA_1    | -5.73 | 14 | 18470.2 | 2  | 3223.5 |   |
| 13591 | Grin2d         | -5.8  | 18 | 0.9     | 14 | 0.15   |   |

Supplemental Table 3  
 FSH + Ad-E versus FSH + Ad-FOXO1(A3), 24 hours

|       | A              | B     | C   | D     | E  | F    | G |
|-------|----------------|-------|-----|-------|----|------|---|
| 13592 | Timm8b         | -5.89 | 8   | 16.42 | 3  | 2.79 |   |
| 13593 | AABR07000156.1 | -6.02 | 6   | 3.15  | 2  | 0.52 |   |
| 13594 | LOC100909750   | -6.02 | 7   | 3.79  | 3  | 0.63 |   |
| 13595 | Bsn            | -6.02 | 12  | 0.2   | 6  | 0.03 |   |
| 13596 | Dpp6           | -6.02 | 20  | 0.73  | 18 | 0.12 |   |
| 13597 | Loxl3          | -6.02 | 12  | 1.02  | 2  | 0.17 |   |
| 13598 | Nhej1          | -6.02 | 19  | 2.31  | 15 | 0.38 |   |
| 13599 | Oit3           | -6.02 | 9   | 1.43  | 3  | 0.24 |   |
| 13600 | RGD1309821     | -6.15 | 24  | 3.57  | 6  | 0.58 |   |
| 13601 | Slc16a14       | -6.24 | 14  | 0.95  | 3  | 0.15 |   |
| 13602 | Gstt1          | -6.35 | 20  | 7.26  | 5  | 1.14 |   |
| 13603 | Cyp19a1        | -6.37 | 278 | 27.7  | 58 | 4.35 |   |
| 13604 | Acsbg1         | -6.46 | 193 | 19.93 | 49 | 3.09 |   |
| 13605 | Ankrd54        | -6.52 | 39  | 6.41  | 8  | 0.98 |   |
| 13606 | Lrrc4b         | -6.54 | 45  | 5.9   | 10 | 0.9  |   |
| 13607 | AABR07043276.1 | -6.69 | 1   | 3.45  | 0  | 0.52 |   |
| 13608 | AC135400.1     | -6.69 | 5   | 6.49  | 1  | 0.97 |   |
| 13609 | Adamts12       | -6.69 | 5   | 0.49  | 2  | 0.07 |   |
| 13610 | Cyp4f1         | -6.69 | 6   | 0.81  | 1  | 0.12 |   |
| 13611 | Fsip1          | -6.69 | 11  | 1.09  | 5  | 0.16 |   |
| 13612 | G0s2           | -6.69 | 5   | 2.48  | 1  | 0.37 |   |
| 13613 | LOC100911393_2 | -6.69 | 0   | 4     | 0  | 0.6  |   |
| 13614 | LOC685431_1    | -6.69 | 2   | 1.05  | 0  | 0.16 |   |
| 13615 | Pard6a         | -6.69 | 12  | 1.52  | 3  | 0.23 |   |
| 13616 | Slc35g2        | -6.69 | 9   | 1.16  | 5  | 0.17 |   |
| 13617 | Slc5a2         | -6.69 | 3   | 0.76  | 2  | 0.11 |   |
| 13618 | Zpbp2          | -6.69 | 17  | 1.22  | 9  | 0.18 |   |
| 13619 | AABR07014855.1 | -6.69 | 4   | 2.8   | 1  | 0.42 |   |
| 13620 | AABR07031184.1 | -6.69 | 1   | 5.2   | 0  | 0.78 |   |
| 13621 | AABR07062344.2 | -6.69 | 6   | 4.3   | 0  | 0.64 |   |
| 13622 | LOC691921      | -6.69 | 20  | 4.83  | 10 | 0.72 |   |
| 13623 | RGD1563956     | -6.69 | 1   | 3.21  | 1  | 0.48 |   |
| 13624 | Ropn1l         | -6.69 | 5   | 1.75  | 1  | 0.26 |   |
| 13625 | Scn1b          | -6.69 | 14  | 2.22  | 3  | 0.33 |   |
| 13626 | Slc15a3        | -6.69 | 6   | 0.8   | 3  | 0.12 |   |
| 13627 | Tgfb3l         | -6.69 | 8   | 2.02  | 8  | 0.3  |   |
| 13628 | Trpc2          | -6.69 | 16  | 0.86  | 19 | 0.13 |   |
| 13629 | Hsd11b2        | -7.02 | 22  | 4.08  | 5  | 0.58 |   |
| 13630 | Nptx2          | -7.19 | 338 | 60.22 | 62 | 8.38 |   |
| 13631 | Slc25a43       | -7.22 | 53  | 4.49  | 19 | 0.62 |   |
| 13632 | Baiap3         | -7.36 | 11  | 0.71  | 3  | 0.1  |   |
| 13633 | Fam161b        | -8.03 | 6   | 1.23  | 3  | 0.15 |   |
| 13634 | Fmod           | -8.03 | 7   | 0.61  | 3  | 0.08 |   |
| 13635 | LOC100363048   | -8.03 | 3   | 9.05  | 1  | 1.13 |   |
| 13636 | Arhgap25       | -8.03 | 12  | 0.64  | 7  | 0.08 |   |
| 13637 | Cdh1           | -8.03 | 7   | 0.49  | 2  | 0.06 |   |
| 13638 | Cenpa          | -8.03 | 5   | 0.86  | 4  | 0.11 |   |
| 13639 | Chrne          | -8.03 | 8   | 1.22  | 4  | 0.15 |   |
| 13640 | Chst1          | -8.03 | 50  | 7.36  | 8  | 0.92 |   |
| 13641 | Degs2          | -8.03 | 9   | 1.69  | 2  | 0.21 |   |
| 13642 | Fgf22          | -8.03 | 24  | 4.44  | 33 | 0.55 |   |
| 13643 | Ftl1l1         | -8.03 | 1   | 3.94  | 0  | 0.49 |   |
| 13644 | Lrrc27         | -8.03 | 11  | 0.87  | 4  | 0.11 |   |
| 13645 | Mgarp          | -8.03 | 7   | 1.8   | 2  | 0.22 |   |

Supplemental Table 3  
 FSH + Ad-E versus FSH + Ad-FOXO1(A3), 24 hours

|       | A              | B      | C    | D      | E    | F     | G                                          |
|-------|----------------|--------|------|--------|------|-------|--------------------------------------------|
| 13646 | Myom3          | -8.03  | 7    | 0.5    | 4    | 0.06  |                                            |
| 13647 | Nlrc5          | -8.03  | 7    | 0.38   | 3    | 0.05  |                                            |
| 13648 | Rpl10l         | -8.03  | 6    | 3.38   | 1    | 0.42  |                                            |
| 13649 | Tbxa2r         | -8.03  | 6    | 1.15   | 1    | 0.14  |                                            |
| 13650 | Tmem184a       | -8.03  | 14   | 2.09   | 4    | 0.26  |                                            |
| 13651 | Tmem88         | -8.03  | 5    | 1.39   | 1    | 0.17  |                                            |
| 13652 | Tp63           | -8.03  | 14   | 0.39   | 7    | 0.05  |                                            |
| 13653 | Trpm8          | -8.03  | 9    | 0.52   | 2    | 0.07  |                                            |
| 13654 | Ttyh2          | -8.03  | 27   | 3.17   | 6    | 0.39  |                                            |
| 13655 | AABR07026311.1 | -8.29  | 10   | 13.94  | 1    | 1.68  |                                            |
| 13656 | AC126148.3     | -8.47  | 0    | 4.38   | 0    | 0.52  |                                            |
| 13657 | Slc2a3         | -9.2   | 52   | 5.05   | 24   | 0.55  |                                            |
| 13658 | 7SK_368        | -9.36  | 3    | 7.5    | 0    | 0.8   |                                            |
| 13659 | AY172581.17    | -9.36  | 7    | 42.24  | 1    | 4.51  |                                            |
| 13660 | Hist1h2bo      | -9.36  | 37   | 2.45   | 13   | 0.26  |                                            |
| 13661 | Lppr5          | -9.36  | 17   | 0.9    | 5    | 0.1   |                                            |
| 13662 | Sfrp1          | -9.36  | 7    | 0.65   | 3    | 0.07  |                                            |
| 13663 | AABR07030911.1 | -9.36  | 0    | 5.59   | 0    | 0.6   |                                            |
| 13664 | Cradd          | -9.36  | 15   | 3.2    | 18   | 0.34  |                                            |
| 13665 | Cubn           | -9.36  | 11   | 0.22   | 7    | 0.02  |                                            |
| 13666 | ENSRNOG0000005 | -9.36  | 7    | 8.12   | 1    | 0.87  |                                            |
| 13667 | Sema3f         | -9.36  | 7    | 0.42   | 2    | 0.04  |                                            |
| 13668 | Socs1          | -9.36  | 7    | 2.23   | 1    | 0.24  |                                            |
| 13669 | Tmem25         | -10.25 | 24   | 3.28   | 4    | 0.32  |                                            |
| 13670 | Nppc           | -10.55 | 41   | 25.2   | 7    | 2.39  |                                            |
| 13671 | Fam221a        | -10.7  | 20   | 1.93   | 12   | 0.18  |                                            |
| 13672 | Hist1h4b_3     | -10.7  | 8    | 9.28   | 1    | 0.87  |                                            |
| 13673 | Atf1           | -12.04 | 17   | 1.22   | 12   | 0.1   |                                            |
| 13674 | Lrrc24         | -12.04 | 14   | 1.62   | 5    | 0.13  |                                            |
| 13675 | Slc12a3        | -12.04 | 9    | 0.75   | 2    | 0.06  |                                            |
| 13676 | Hmg1l1_1       | -13.38 | 3    | 2.87   | 0    | 0.21  |                                            |
| 13677 | SNORD83_2      | -13.38 | 0    | 45.83  | 0    | 3.43  |                                            |
| 13678 | Tmem44         | -13.38 | 14   | 1.8    | 4    | 0.13  |                                            |
| 13679 | Mt1_2          | -13.82 | 10   | 32.25  | 2    | 2.33  |                                            |
| 13680 | P2rx6          | -14.71 | 19   | 1.74   | 4    | 0.12  |                                            |
| 13681 | Atp8b3         | -14.71 | 16   | 0.91   | 1    | 0.06  |                                            |
| 13682 | Tnfsf13b       | -14.71 | 15   | 1.85   | 6    | 0.13  |                                            |
| 13683 | RGD1565368     | -15.58 | 36   | 160.1  | 2    | 10.28 |                                            |
| 13684 | AABR07011951.1 | -18.06 | 24   | 66.83  | 1    | 3.7   |                                            |
| 13685 | AY172581.20    | -34.78 | 16   | 136.43 | 0    | 3.92  |                                            |
| 13686 | AABR07001519.1 | -∞     | 22   | 0.71   | 31   | 0     | Genes not used for Pathway Studio analysis |
| 13687 | AABR07002068.1 | -∞     | 824  | 0.09   | 1226 | 0     |                                            |
| 13688 | AABR07003001.2 | -∞     | 804  | 1.12   | 974  | 0     |                                            |
| 13689 | AABR07043564.1 | -∞     | 24   | 0.25   | 32   | 0     |                                            |
| 13690 | Cngb3          | -∞     | 20   | 0.12   | 22   | 0     |                                            |
| 13691 | Cntnap5a       | -∞     | 2569 | 0.09   | 3029 | 0     |                                            |
| 13692 | Fstl5          | -∞     | 24   | 0.1    | 18   | 0     |                                            |
| 13693 | Gpc6           | -∞     | 47   | 0.31   | 50   | 0     |                                            |
| 13694 | Grid2          | -∞     | 24   | 0.18   | 21   | 0     |                                            |
| 13695 | Lace1          | -∞     | 42   | 2.94   | 50   | 0     |                                            |
| 13696 | Mctp1          | -∞     | 24   | 0.16   | 36   | 0     |                                            |
| 13697 | Megf11         | -∞     | 26   | 0.21   | 20   | 0     |                                            |

Supplemental Table 3  
 FSH + Ad-E versus FSH + Ad-FOXO1(A3), 24 hours

|       | A             | B         | C   | D    | E   | F | G |
|-------|---------------|-----------|-----|------|-----|---|---|
| 13698 | Myo7b         | $-\infty$ | 292 | 0.11 | 832 | 0 |   |
| 13699 | Nos1          | $-\infty$ | 210 | 0.11 | 262 | 0 |   |
| 13700 | Nup210l       | $-\infty$ | 20  | 0.06 | 18  | 0 |   |
| 13701 | Ptpst         | $-\infty$ | 23  | 0.1  | 15  | 0 |   |
| 13702 | Rn60_X_0640.3 | $-\infty$ | 26  | 0.45 | 32  | 0 |   |
| 13703 | Rtp2          | $-\infty$ | 72  | 0.39 | 75  | 0 |   |
| 13704 | Smlr1         | $-\infty$ | 49  | 0.64 | 44  | 0 |   |
| 13705 | Tepp          | $-\infty$ | 23  | 1.15 | 22  | 0 |   |
| 13706 | Zbtb7c        | $-\infty$ | 22  | 0.45 | 18  | 0 |   |
