# Supplementary material
Source: PubMed Central journal article supplement (PMC4983523)
Supplement: NIHMS800666-supplement-7.pdf [file NIHMS800666-supplement-7.pdf]

Supplemental Table 4  
 Pathway Studio Analysis  
 Genes down-regulated  $\geq 2$ -fold by FSH + Ad-FOXO1(A3) versus FSH + Ad-E  
 (Genes repressed by FOXO1 in the absence of FSH)

|    | A                                          | B              | C                                                                                                                                                                                                                                                                                       |
|----|--------------------------------------------|----------------|-----------------------------------------------------------------------------------------------------------------------------------------------------------------------------------------------------------------------------------------------------------------------------------------|
| 1  | <b>Functional Groups/Pathways</b>          | <b>p-value</b> | <b>Overlapping Entities</b>                                                                                                                                                                                                                                                             |
| 2  | <b>Angiogenesis</b>                        |                |                                                                                                                                                                                                                                                                                         |
| 3  | angiogenesis                               | 0.0083         | EGFL7;SEMA4A;TGFB1;NOTCH1;NOS3;EPHB2;RBPJ;EPHB3;IL15;HMOX1;EPHA2;ADRA2B;ACVRL1;SOX18;FLT4;FGF18;GJA5;EFNA1                                                                                                                                                                              |
| 4  |                                            |                |                                                                                                                                                                                                                                                                                         |
| 5  | <b>Apoptosis</b>                           |                |                                                                                                                                                                                                                                                                                         |
| 6  | positive regulation of apoptotic process   | 0.0099         | GAL;ALDH1A3;NOTCH1;FGFR3;NOS3;PHLDA3;MAP2K6;WNT11;ARHGAP4;EFHC1;SFRP4;AGER;SAP18;INPP5D;NET1;S100B;APH1A;IFIT2;ARHGAP9;FAM72A;TSPO;IGFBP3;SFRP1;MELK                                                                                                                                    |
| 7  |                                            |                |                                                                                                                                                                                                                                                                                         |
| 8  | <b>Biosynthesis</b>                        |                |                                                                                                                                                                                                                                                                                         |
| 9  | steroid biosynthetic process               | 4.58E-07       | PRLR;MVD;SCARB1;HSD17B1;CYP11A1;FDX1;STAR;CYP19A1;HSD17B3;DHCR7;CYP17A1;FDXR;TSPO;STARD5                                                                                                                                                                                                |
| 10 | testosterone biosynthetic process          | 3.12E-05       | HSD17B1;CYP11A1;STAR;HSD17B3                                                                                                                                                                                                                                                            |
| 11 | regulation of steroid biosynthetic process | 5.37E-05       | DHH;STAR;LHCGR;TSPO;NR5A1                                                                                                                                                                                                                                                               |
| 12 | cellular amino acid biosynthetic process   | 5.54E-05       | GPT;CTH;PYCR1;PHGDH;MRI1;GOT1;PSAT1;CBS                                                                                                                                                                                                                                                 |
| 13 | hydrogen sulfide biosynthetic process      | 5.75E-05       | CTH;MPST;CBS                                                                                                                                                                                                                                                                            |
| 14 | estrogen biosynthetic process              | 0.00085        | HSD17B1;CYP11A1;STAR;CYP19A1                                                                                                                                                                                                                                                            |
| 15 | retinoic acid biosynthetic process         | 0.0017         | ALDH1A3;RBP1;CRABP2                                                                                                                                                                                                                                                                     |
| 16 |                                            |                |                                                                                                                                                                                                                                                                                         |
| 17 | <b>Catabolic</b>                           |                |                                                                                                                                                                                                                                                                                         |
| 18 | GTP catabolic process                      | 0.0024         | TUBD1;ATL1;RAB6B;GNA14;TUBG2;RAC3;RASL12;RAP2B;DNM1;ARF6;RAB3A;RASD1;TUBA4A;GNB5;MFN2;TBCC;MX2;TUBB3                                                                                                                                                                                    |
| 19 |                                            |                |                                                                                                                                                                                                                                                                                         |
| 20 | <b>Cell Growth</b>                         |                |                                                                                                                                                                                                                                                                                         |
| 21 |                                            |                |                                                                                                                                                                                                                                                                                         |
| 22 | <b>Cytoskeleton</b>                        |                |                                                                                                                                                                                                                                                                                         |
| 23 | cell adhesion                              | 0.00016        | PCDHB5;CDHR1;MUC4;PCDH10;SCARB1;TGFB1;CADM2;MSLN;TMEM8A;EMILIN1;CADM4;CELSR2;CDH8;PCDHB11;TENM2;ACHE;ATP1B1;ATP1B2;LAMC3;ACAN;EPHA2;LY6D;CD99L2;CDH24;HAPLN1;ARF6;KITLG;CDH18;CDH1;BCAM;PLXNC1;CLDN11;TROAP;LAMC2;PRKCE;F11R;SCN1B;SCARF1;CNTN1;PCDH8;ITGA9;CNTNAP1;NINJ1;CLSTN3;AMIGO2 |

## Supplemental Table 4

## Pathway Studio Analysis

Genes down-regulated  $\geq 2$ -fold by FSH + Ad-FOXO1(A3) versus FSH + Ad-E

(Genes repressed by FOXO1 in the absence of FSH)

|    | A                                       | B        | C                                                                                                                                                                                                                                                                                                                                                                                                                       |
|----|-----------------------------------------|----------|-------------------------------------------------------------------------------------------------------------------------------------------------------------------------------------------------------------------------------------------------------------------------------------------------------------------------------------------------------------------------------------------------------------------------|
| 24 | cell-cell junction organization         | 0.00117  | XIRP2;CADM2;CDH8;OCLN;CDH24;CDH18;CDH1;PARD6A;F11R                                                                                                                                                                                                                                                                                                                                                                      |
| 25 | axon guidance                           | 0.0018   | NTN3;DRGX;MATN2;SEMA4A;SLIT3;TENM2;EPHB2;EPHB3;SEMA7A;SEMA3F;GFRA1;ABLIM3;B3GNT1;UNC5D;ABLIM2;SCN8A;PLXNC1;SCN1B;EFNB3;CNTN1;ITGA9;CNTNAP1;SPTBN5;CACNA1D;TUBB3                                                                                                                                                                                                                                                         |
| 26 | cell junction assembly                  | 0.0023   | CADM2;CDH8;KRT14;CDH24;CDH18;CDH1;PARD6A;LAMC2;F11R                                                                                                                                                                                                                                                                                                                                                                     |
| 27 | regulation of secretion                 | 0.0043   | TMEM184A;POFUT2                                                                                                                                                                                                                                                                                                                                                                                                         |
| 28 |                                         |          |                                                                                                                                                                                                                                                                                                                                                                                                                         |
| 29 | <b>Development</b>                      |          |                                                                                                                                                                                                                                                                                                                                                                                                                         |
| 30 | cell differentiation                    | 0.00011  | TUBD1;RORC;DNER;TP63;EGFL7;TBATA;FGF22;SEMA4A;INHBA;SLIT3;NANOS3;NOTCH1;PRKCH;FGFR3;CEBPA;MDFI;TSSK6;PSMB8;SH3PXD2B;INHA;WNT11;NLRP14;SEMA7A;IHH;PAPPA;NAV1;SFRP4;TSSK3;EPHA2;SPATA18;PIWIL2;OSGIN1;ARF6;CDC20;SPATA25;CLGN;TRIP13;INHBB;KIT;DHCR7;F11R;CALR3;GLDN;CBFA2T3;NOTCH3;EFNB3;GPM6B;NR5A1;ADCYAP1R1;JAG2;CREB3L4;SFRP1                                                                                        |
| 31 | multicellular organismal development    | 0.000441 | TUBD1;RORC;DNER;ENC1;TP63;DHH;SPDYA;BST2;NANOS3;NOTCH1;CHURC1;IGF2;MDFI;TSSK6;EPHB2;EPHB3;WNT11;SEMA3F;IHH;SFRP4;MST1R;EPHA2;ID2;HMGB3;CLGN;PLXNC1;WNT6;SPRY3;GLDN;KIF26B;NOTCH3;ESRRG;TULP3;EMX2;ANGPTL2;ADCYAP1R1;HSPA2;CREB3L4;CHRD;GPX4;SFRP1;H2AFZ;TBATA;EGFL7;GAPDH;DRGX;SEMA4A;SLIT3;CELSR2;EBF3;NLRP14;SEMA7A;NAV1;TSSK3;SPATA18;PIWIL2;OSGIN1;NFE2;UNC5D;SMPD3;HOXD3;PLAC1;LMO2;TMEM107;EFNB3;MFN2;JAG2;TMEM88 |
| 32 | cell maturation                         | 0.0018   | CEBPA;SOX8;IHH;IL15;ID2;SOX18;POU2F2                                                                                                                                                                                                                                                                                                                                                                                    |
| 33 | positive regulation of synapse assembly | 0.0028   | LRRC4B;CBLN1;EPHB2;CBLN2;EPHB3                                                                                                                                                                                                                                                                                                                                                                                          |
| 34 | female gonad development                | 0.0046   | LHX8;FANCA;LHCGR;NR5A1;SFRP1                                                                                                                                                                                                                                                                                                                                                                                            |
| 35 | ovarian follicle development            | 0.008163 | INHBA;INHA;ADCYAP1;KITLG;INHBB;KIT;LHCGR                                                                                                                                                                                                                                                                                                                                                                                |
| 36 |                                         |          |                                                                                                                                                                                                                                                                                                                                                                                                                         |
| 37 | <b>DNA repair</b>                       |          |                                                                                                                                                                                                                                                                                                                                                                                                                         |
| 38 | response to ionizing radiation          | 0.0014   | CYP2R1;CYP11A1;KRT14;STAR;CYP19A1;CYP17A1;RAD54L;NHEJ1                                                                                                                                                                                                                                                                                                                                                                  |
| 39 |                                         |          |                                                                                                                                                                                                                                                                                                                                                                                                                         |
| 40 | <b>Metabolic</b>                        |          |                                                                                                                                                                                                                                                                                                                                                                                                                         |

## Supplemental Table 4

## Pathway Studio Analysis

Genes down-regulated  $\geq 2$ -fold by FSH + Ad-FOXO1(A3) versus FSH + Ad-E

(Genes repressed by FOXO1 in the absence of FSH)

|    | A                                            | B        | C                                                                                                                                                                                                                                                                                                                                                                                                                                                                                                                                                                                                                                                                           |
|----|----------------------------------------------|----------|-----------------------------------------------------------------------------------------------------------------------------------------------------------------------------------------------------------------------------------------------------------------------------------------------------------------------------------------------------------------------------------------------------------------------------------------------------------------------------------------------------------------------------------------------------------------------------------------------------------------------------------------------------------------------------|
| 41 | small molecule metabolic process             | 1.02E-11 | GPT;MTMR7;COX6A1;ELOVL7;CTH;SLC2A3;PRODH;PYCR1;IDH3G;HPRT1;ETNK2;SLC25A1;PHGDH;CYP2R1;CHST1;NOS3;ALAS1;GOS2;FMOD;GPD1;TPH1;B3GAT2;HMOX1;ACAN;SPHK1;B3GNT1;SLC22A3;PLA2G1B;STAR;SLC2A1;CHST7;CYP19A1;INPP5D;SLC25A21;NPAS2;ACP5;GSTA2;BCKDHA;SLC19A1;DHCR7;CYP17A1;PSMB3;PSAT1;ALOX5AP;SLC26A2;FDXR;STARD5;FADS2;CACNA1A;PTGDS;ADCY7;GPX4;SLC25A10;GNS;HS6ST2;GAPDH;MGAM;NDUFA7;MVD;SCARB1;PRELP;LIPE;EPHX2;GSR;DEGS2;ALDH2;CUBN;MRI1;HSD17B1;PSMB8;NDUFS7;PSMB9;CYP11A1;BTD;FDX1;GAMT;BLVRB;SLC16A3;ISYNA1;KCNS3;TST;ACHE;CERK;MMACHC;GOT1;NUDT5;GSTT1;PDXK;HSD17B3;SLC27A1;GLA;UQCR10;NAT1;KCNG2;PRKAR2B;AMPD1;SLC44A2;SMPD3;B3GNT7;MGST2;NAGLU;GSTA1;HADH;CACNA1D;GDA;CBS |
| 42 | oxidation-reduction process                  | 2.22E-07 | VKORC1;GAPDH;HSD11B2;NDUFA7;DHRS11;PRODH;SOD3;PYCR1;ALDH3B1;IDH3G;ALDH1A3;GSR;DEGS2;ALDH2;ALDH1L1;PHGDH;CYP2R1;NOS3;HSD17B1;NDUFS7;COX4I2;CYP11A1;DCXR;SEPW1;FDX1;GPD1;BLVRB;TPH1;ASPHD2;OGFOD2;PYROXD2;HMOX1;GSTT1;CYBB;P4HTM;GPX3;CYP19A1;RTN4IP1;HSD17B3;UQCR10;DHRS1;ALKBH6;DUOX2;BCKDHA;LOXL3;BCO2;MSRA;DHCR7;CYP17A1;RDH5;FDXR;FADS6;MGST2;FADS2;HADH;SORD;MECR;HAO2;GPX4                                                                                                                                                                                                                                                                                             |
| 43 | metabolic process                            | 1.34E-05 | GNS;PDXP;HSD11B2;MGAM;TNFAIP3;DHRS11;CHIT1;SCLY;LIPE;ALDH3B1;ALDH1A3;EPHX2;PM20D1;NDST3;ALDH2;ALDH1L1;PHGDH;RAG1;ALAS1;HSD17B1;DCXR;TPH1;ACAA2;CERK;ECHDC3;SPHK1;ACSM5;HSD17B3;SLC27A1;GLA;NAT1;NAGA;DHRS1;BCKDHA;ISOC1;DNPH1;PSAT1;RDH5;NAGLU;GSTA1;ACSBG1;OGG1                                                                                                                                                                                                                                                                                                                                                                                                            |
| 44 | steroid metabolic process                    | 3.16E-05 | MVD;LIPE;CYP2R1;CUBN;HSD17B1;CYP11A1;FDX1;STAR;CYP19A1;HSD17B3;DHCR7;CYP17A1;FDXR;TSPO;STARD5;UGT1A8                                                                                                                                                                                                                                                                                                                                                                                                                                                                                                                                                                        |
| 45 | carbohydrate metabolic process               | 4.93E-05 | SLC25A10;GNS;HS6ST2;GAPDH;MGAM;SLC2A3;CHIT1;PRELP;IDH3G;IGF2;ALDH2;SLC25A1;CHST1;ABO;FMOD;DCXR;GPD1;SLC5A2;B3GAT2;GOT1;ACAN;B3GNT1;SLC2A1;CHST7;GLA;NAGA;MGAT4A;FUT4;DPM3;B3GNT7;POFUT2;SLC26A2;NAGLU;CHST8                                                                                                                                                                                                                                                                                                                                                                                                                                                                 |
| 46 | cellular nitrogen compound metabolic process | 0.0003   | GPT;SLC25A10;CTH;PRODH;PYCR1;PHGDH;MRI1;PSMB8;PSMB9;GAMT;TPH1;TST;GOT1;SLC25A21;BCKDHA;PSMB3;PSAT1;CBS                                                                                                                                                                                                                                                                                                                                                                                                                                                                                                                                                                      |
| 47 | superoxide metabolic process                 | 0.001    | SOD3;SH3PXD2B;CYBB;PREX1;CBS                                                                                                                                                                                                                                                                                                                                                                                                                                                                                                                                                                                                                                                |

## Supplemental Table 4

## Pathway Studio Analysis

Genes down-regulated  $\geq 2$ -fold by FSH + Ad-FOXO1(A3) versus FSH + Ad-E

(Genes repressed by FOXO1 in the absence of FSH)

|    | A                                                             | B        | C                                                                                                                                                                                                                                                                      |
|----|---------------------------------------------------------------|----------|------------------------------------------------------------------------------------------------------------------------------------------------------------------------------------------------------------------------------------------------------------------------|
| 48 | cellular protein metabolic process                            | 0.0019   | VKORC1;DOLK;RPLP1;RPS27;MUC4;GALNT6;RPL8;RPS29;CGA;IGF2;RPL10A;TIMM8B;DOLPP1;RPL36;PAPPA;MAN1C1;SPHK1;TIMM13;RPS16;PIGC;RPL39;MGAT4A;DPM3;B3GNT7;TUBA4A;RPLP0;RPL38;TBCC;HERPUD1;RPS2;TIMM17B;IGFBP3;TUBB3;PLAUR                                                       |
| 49 | cellular amino acid metabolic process                         | 0.00293  | SCLY;SLC7A6;GOT1;BPHL;GCAT;SLC7A7;SLC7A4                                                                                                                                                                                                                               |
| 50 | inflammatory response                                         | 0.0045   | PRKCZ;NFKBID;TNFAIP3;TBXA2R;GAL;EPHX2;CHST1;SEMA7A;SCUBE1;IL15;TLR8;AGER;SPHK1;CYBB;C4A;PTX3;LIAS;NFAM1;CCL5;KIT;CCRL2;F11R;DDT;TNFRSF4;IL17RE                                                                                                                         |
| 51 | lipid metabolic process                                       | 0.0059   | THEM5;ELOVL7;MVD;LIPE;ALDH3B1;EPHX2;ETNK2;DEGS2;CUBN;HSD17B1;LIPG;CYP11A1;FDX1;ISYNA1;ACAA2;NR2F2;PLA2G1B;ACSM5;HSD17B3;SLC27A1;THEM4;SMPD3;DHCR7;NAP EPLD;FDXR;FADS6;FADS2;HADH;ACSBG1;PTGDS;MECR                                                                     |
| 52 | gluconeogenesis                                               | 0.009    | GPT;SLC25A10;GAPDH;SLC25A1;GPD1;GOT1                                                                                                                                                                                                                                   |
| 53 |                                                               |          |                                                                                                                                                                                                                                                                        |
| 54 | <b>Proliferation, Cell cycle</b>                              |          |                                                                                                                                                                                                                                                                        |
| 55 | positive regulation of cell proliferation                     | 0.00011  | PRKCZ;SPDYA;MVD;MAS1;CGA;NOTCH1;FGFR3;IGF2;EPCAM;GDF9;ABO;RBPJ;BNC1;CNTFR;IHH;ADCYAP1;MATK;MST1R;IL15;SPHK1;ID2;CHRNA7;PRAMEF8;CDC20;KITLG;CDC25B;ID4;EDNRB;S100B;KIT;FZR1;AREG;PDF;PTN;TNFSF13B;FLT4;FGF18;FNTB;SFRP1                                                 |
| 56 |                                                               |          |                                                                                                                                                                                                                                                                        |
| 57 | <b>Signaling</b>                                              |          |                                                                                                                                                                                                                                                                        |
| 58 | synaptic transmission                                         | 1.51E-07 | HCN2;ABCC9;PCDHB5;KCNCB3;BSN;NPTX2;ALDH2;CBLN1;CDH8;PCDHB11;KCNJ9;CHRNE;KCNS3;ACHE;DLG2;SLC6A1;SLC12A5;KCNC4;CHRNA7;KCNCB2;KCNG2;KCNN1;GRIA2;PRKCB;RAB3A;KCNH2;KCNQ1;SCN1B;ARHGEF9;SYN2;PCDH8;RAPSNG;RIN2D;TSPO;CNTNAP1;KCNN2;CACNA1A;CLSTN3;UNC13A;ADCY7;CHRNA5;KCNK1 |
| 59 | response to estradiol                                         | 0.00015  | DHH;MUC4;IGF2;ALDH2;NOS3;IHH;CCNE1;NR2F2;SFRP4;SOC S1;SLC6A1;CYP19A1;AREG;MMP15;ADCYAP1R1;OGG1;GPX4                                                                                                                                                                    |
| 60 | Notch signaling pathway                                       | 0.00019  | ARRB1;DNER;TP63;NOTCH1;RBPJ;CHAC1;MIB2;TLE2;APH1A;MOV10;HOXD3;DTX1;NOTCH3;CNTN1;JAG2                                                                                                                                                                                   |
| 61 | cell-cell signaling                                           | 0.00076  | HCN2;DHH;CGA;INHBA;BST2;FGFR3;INHA;WNT11;IHH;ADCYAP1;IL15;CD80;NFE2;WNT6;CCL5;ADRA2B;FGF11;EFNB3;PCDH8;NR5A1;FGF18;EFNA1                                                                                                                                               |
| 62 | cellular response to transforming growth factor beta stimulus | 0.002    | MUC4;NOS3;CYP11A1;STAR;CCL5;ACVRL1;SFRP1                                                                                                                                                                                                                               |

## Supplemental Table 4

## Pathway Studio Analysis

Genes down-regulated  $\geq 2$ -fold by FSH + Ad-FOXO1(A3) versus FSH + Ad-E

(Genes repressed by FOXO1 in the absence of FSH)

|    | A                                                                   | B       | C                                                                                                                                                                                                                             |
|----|---------------------------------------------------------------------|---------|-------------------------------------------------------------------------------------------------------------------------------------------------------------------------------------------------------------------------------|
| 63 | neurotrophin TRK receptor signaling pathway                         | 0.0026  | FGF22;MAPK12;FGFR3;ADCYAP1;ARHGAP4;CD80;THEM4;KITLG;PRKAR2B;NET1;KIT;APH1A;MOV10;PRKCE;SHC2;DDIT4;ARHGEF9;LINGO1;ADCYAP1R1;ADCY7;FGF18                                                                                        |
| 64 | positive regulation of tyrosine phosphorylation of Stat1 protein    | 0.00405 | FGFR3;HPX;KIT                                                                                                                                                                                                                 |
| 65 | cellular response to cAMP                                           | 0.0041  | CFTR;CYP11A1;GPD1;STAR;DMTN;KCNQ1;PDE4D                                                                                                                                                                                       |
| 66 | transmembrane receptor protein tyrosine kinase signaling pathway    | 0.0049  | ANGPTL1;EPHB2;EPHB3;ADCYAP1;GFRA1;MST1R;EPHA2;KIT;ADCYAP1R1;FLT4                                                                                                                                                              |
| 67 | protein phosphorylation                                             | 0.0065  | RORC;PRKCZ;TRIB2;MAPK12;SGK1;LIPE;NEK2;PRKCH;FGFR3;TSSK6;EPHB2;MAP2K6;EPHB3;KNDC1;WNT11;ULK4;CCNE1;HIPK4;MAPK4;MATK;MST1R;TSSK3;EPHA2;MOK;CDC25B;PRKAR2B;PRKCB;CCL5;ACVRL1;MAST4;KIT;ADCK1;PRKCE;CAMKV;CDKL4;FLT4;IGFBP3;MELK |
| 68 | protein kinase C signaling                                          | 0.0075  | PRKCZ;MAS1;PRKCH                                                                                                                                                                                                              |
| 69 | cellular response to hormone stimulus                               | 0.0081  | CFTR;CGA;SLIT3;ALDH2;HSD17B3;RXRG                                                                                                                                                                                             |
| 70 | ephrin receptor signaling pathway                                   | 0.0082  | EPHB2;EPHB3;EPHA2;EFNB3;EFNA1                                                                                                                                                                                                 |
| 71 | activin receptor signaling pathway                                  | 0.0097  | INHBA;INHBB;ACVRL1                                                                                                                                                                                                            |
| 72 |                                                                     |         |                                                                                                                                                                                                                               |
| 73 | <b>Translation, mRNA stability</b>                                  |         |                                                                                                                                                                                                                               |
| 74 | nuclear-transcribed mRNA catabolic process, nonsense-mediated decay | 0.0027  | RPLP1;RPS27;RPL8;RPS29;RPL10A;RPL36;DCP2;RPS16;RPL39;RPLP0;RPL38;RPS2                                                                                                                                                         |
| 75 |                                                                     |         |                                                                                                                                                                                                                               |
| 76 | <b>Transcription</b>                                                |         |                                                                                                                                                                                                                               |
| 77 | nucleosome assembly                                                 | 0.0031  | H2AFZ;CENPA;HMGB2;HIST1H2BO;HIST1H2BL;CENPK;CASC5;HIST1H1D;HIST1H3F;HJURP;MIS18A;CENPH;HIST1H2BG;H1FOO                                                                                                                        |
| 78 | positive regulation of gene expression                              | 0.0095  | EPHX2;SOX8;RBPJ;WNT11;SFRP4;GRHL3;AGER;STAR;ID2;WNT6;MAF;CCL5;KIT;HOXD3;CNTN1;PLAUR                                                                                                                                           |
| 79 |                                                                     |         |                                                                                                                                                                                                                               |
| 80 | <b>Transport</b>                                                    |         |                                                                                                                                                                                                                               |

## Supplemental Table 4

## Pathway Studio Analysis

Genes down-regulated  $\geq 2$ -fold by FSH + Ad-FOXO1(A3) versus FSH + Ad-E  
(Genes repressed by FOXO1 in the absence of FSH)

|    | A                       | B        | C                                                                                                                                                                                                                                                                                                                                                                                                                                                                                                                                                                                                                                                                                                                                                                                           |
|----|-------------------------|----------|---------------------------------------------------------------------------------------------------------------------------------------------------------------------------------------------------------------------------------------------------------------------------------------------------------------------------------------------------------------------------------------------------------------------------------------------------------------------------------------------------------------------------------------------------------------------------------------------------------------------------------------------------------------------------------------------------------------------------------------------------------------------------------------------|
| 81 | transmembrane transport | 1.62E-08 | HCN2;ABCC9;SLC25A10;CFTR;SLC2A3;SGK1;ABCG4;SLC50A1;SLC27A6;SLC12A3;TAP2;SLC7A11;SLC7A6;SLC39A11;SLC16A3;SLC5A2;KCNS3;ATP1B1;ATP1B2;HMOX1;TRPV4;HVCN1;SLC22A3;SLC2A1;SLC6A1;SLC25A43;FLVCR2;SLC12A5;KCNC4;SLC25A21;SLC27A1;ATP6V1C2;SCN8A;SLC25A30;SLC15A3;TRPM8;ABCC4;SLC16A14;PRKAR2B;SLC16A12;SFXN5;SLC44A2;SLC19A1;MFSD4;SLC16A6;KCNH2;SLC7A7;KCNQ1;ARHGEF9;SLC26A2;TMCO3;SPNS2;SLC6A7;CACNA1A;CACNA1D;ADCY7;SLC29A2;ABCB6;GJA5;CASQ1                                                                                                                                                                                                                                                                                                                                                    |
| 82 | transport               | 1.84E-07 | HCN2;ABCC9;CFTR;SLC2A3;SLC50A1;SLC25A1;SLC12A3;KCNT1;SLC7A11;NXT1;PITPNM3;RILP;ASNA1;ATP1B2;SLC26A11;TRPV4;HVCN1;PLLP;CYBB;SLC22A3;RBP1;STAR;SLC2A1;SLC6A1;FLVCR2;SLC12A5;TIMM13;AP5Z1;KCNC4;SLC25A21;CHRNA7;KCNAB2;SCN8A;KCNN1;TRPM8;GABRP;CRABP2;GRIA2;SLC16A12;SFXN5;SLC19A1;RAB3A;MYO7A;SLC16A6;SLC7A4;TTYH2;SLC26A2;FDXR;SLC6A7;GRIN2D;STARD5;FADS2;KCNN2;CACNA1A;FOLR1;SCARA5;PTGDS;TIMM17B;ASIC4;SLC29A2;ABCB6;RIMS4;ARRB1;SLC25A10;NDUFA7;KCTD14;RAB6B;KCNAB3;TAP2;CUBN;KCNJ9;NDUFS7;CHRNE;TIMM8B;HPX;SLC7A6;FDX1;SLC39A11;SLC16A3;SLC5A2;KCNS3;ATP1B1;P2RX5;MFSD2A;SEC14L2;SLC25A43;SLC27A1;UQCR10;SPIRE2;ARF6;KCNNG2;ATP6V1C2;SLC25A30;SLC15A3;SLC16A14;SLC44A2;MFSD4;KCNH2;SLC7A7;PKD2L2;KCNQ1;SCN1B;CLIC3;KCNK5;TMCO3;GPM6B;SPNS2;P2RX6;KIF17;RAB4B;CACNA1D;SORCS2;CHRNA5;KCNK1 |
| 83 | potassium ion transport | 1.24E-06 | HCN2;ABCC9;KCNAB3;KCNJ9;KCNT1;KCNS3;ATP1B1;ATP1B2;SLC12A5;KCNC4;KCNAB2;KCNNG2;KCNN1;KCNH2;KCNQ1;KCNK5;KCNN2;KCNK1;GJA5                                                                                                                                                                                                                                                                                                                                                                                                                                                                                                                                                                                                                                                                      |
